# Supplementary material
Source: PubMed Central journal article supplement (PMC7528407)
Supplement: hvaa177_supplementary_materials.pdf [file hvaa177_supplementary_materials.pdf]

## **Identifying optimal loci for the molecular diagnosis of microsatellite instability**

**Authors:** Dustin R. Long, Adam Waalkes, Varun P. Panicker, Ronald J. Hause Jr., and Stephen J. Salipante

### **Supplemental Information**

#### **Contents:**

**Page 2: Supplemental Figure 1. Flowchart summarizing process for cataloging microsatellite instability events.**

**Page 3: Supplemental Figure 2. Relative burden of microsatellite instability events across cancer types, inferred from whole genome sequence data.** Percentage of total microsatellite loci found to be mutated are reported per tumor specimen, as stratified by cancer type. Each point corresponds to an individual tumor, and its coloration indicates the corresponding MSI classification. TCGA abbreviations for cancer types are as described in the Table 1 footnote.

**Pages 4-185: Supplemental Table 1. Inferred MSI diagnosis for tumors from exome sequencing.**

**Pages 186-203: Supplemental Table 2. Inferred MSI diagnosis for tumors from whole genome sequencing**

**Pages 204: Supplemental Table 3. Summary of inferred MSI diagnoses from whole genome sequencing**

**Pages 205-242: Supplemental Table 4. Microsatellites most informative for MSI per cancer type (p value)**

**Page 243: Supplemental Table 5. Pairwise Euclidean dissimilarity matrix of tissue-specific informative microsatellite loci based on tissue-scaled p values**

**Page 244: Supplemental Table 6. Pairwise Cophenetic dissimilarity matrix of tissue-specific informative microsatellite loci based on tissue-scaled p values**

**Page 245: Supplemental Table 7. Coordinates and p values of cross-informative microsatellites for diagnosing MSI in endometrial, colon, rectal, and stomach cancers**

**Page 246: Supplemental Table 8. Covariates associated with instability of MSI-informative microsatellites**

# Supplementary Figure 1

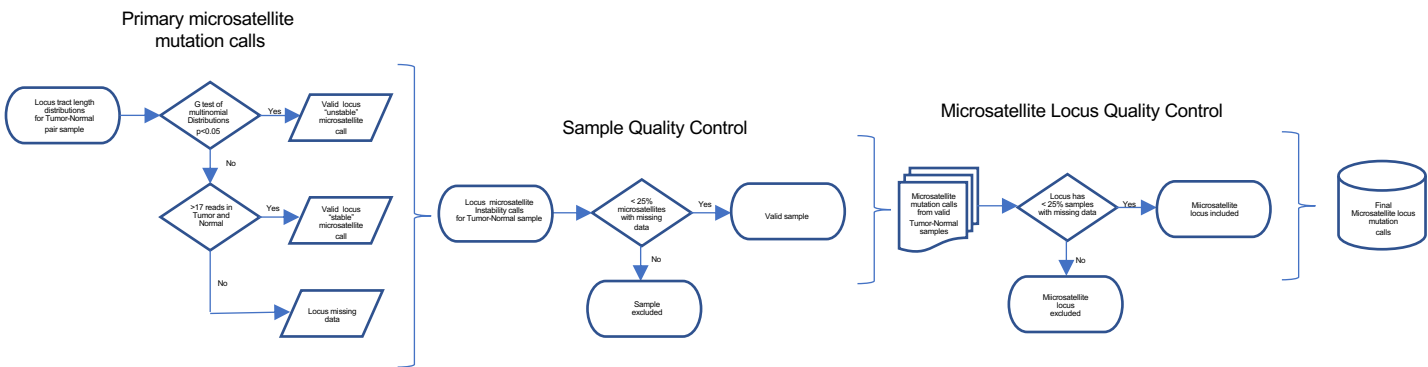

Supplementary Figure 2

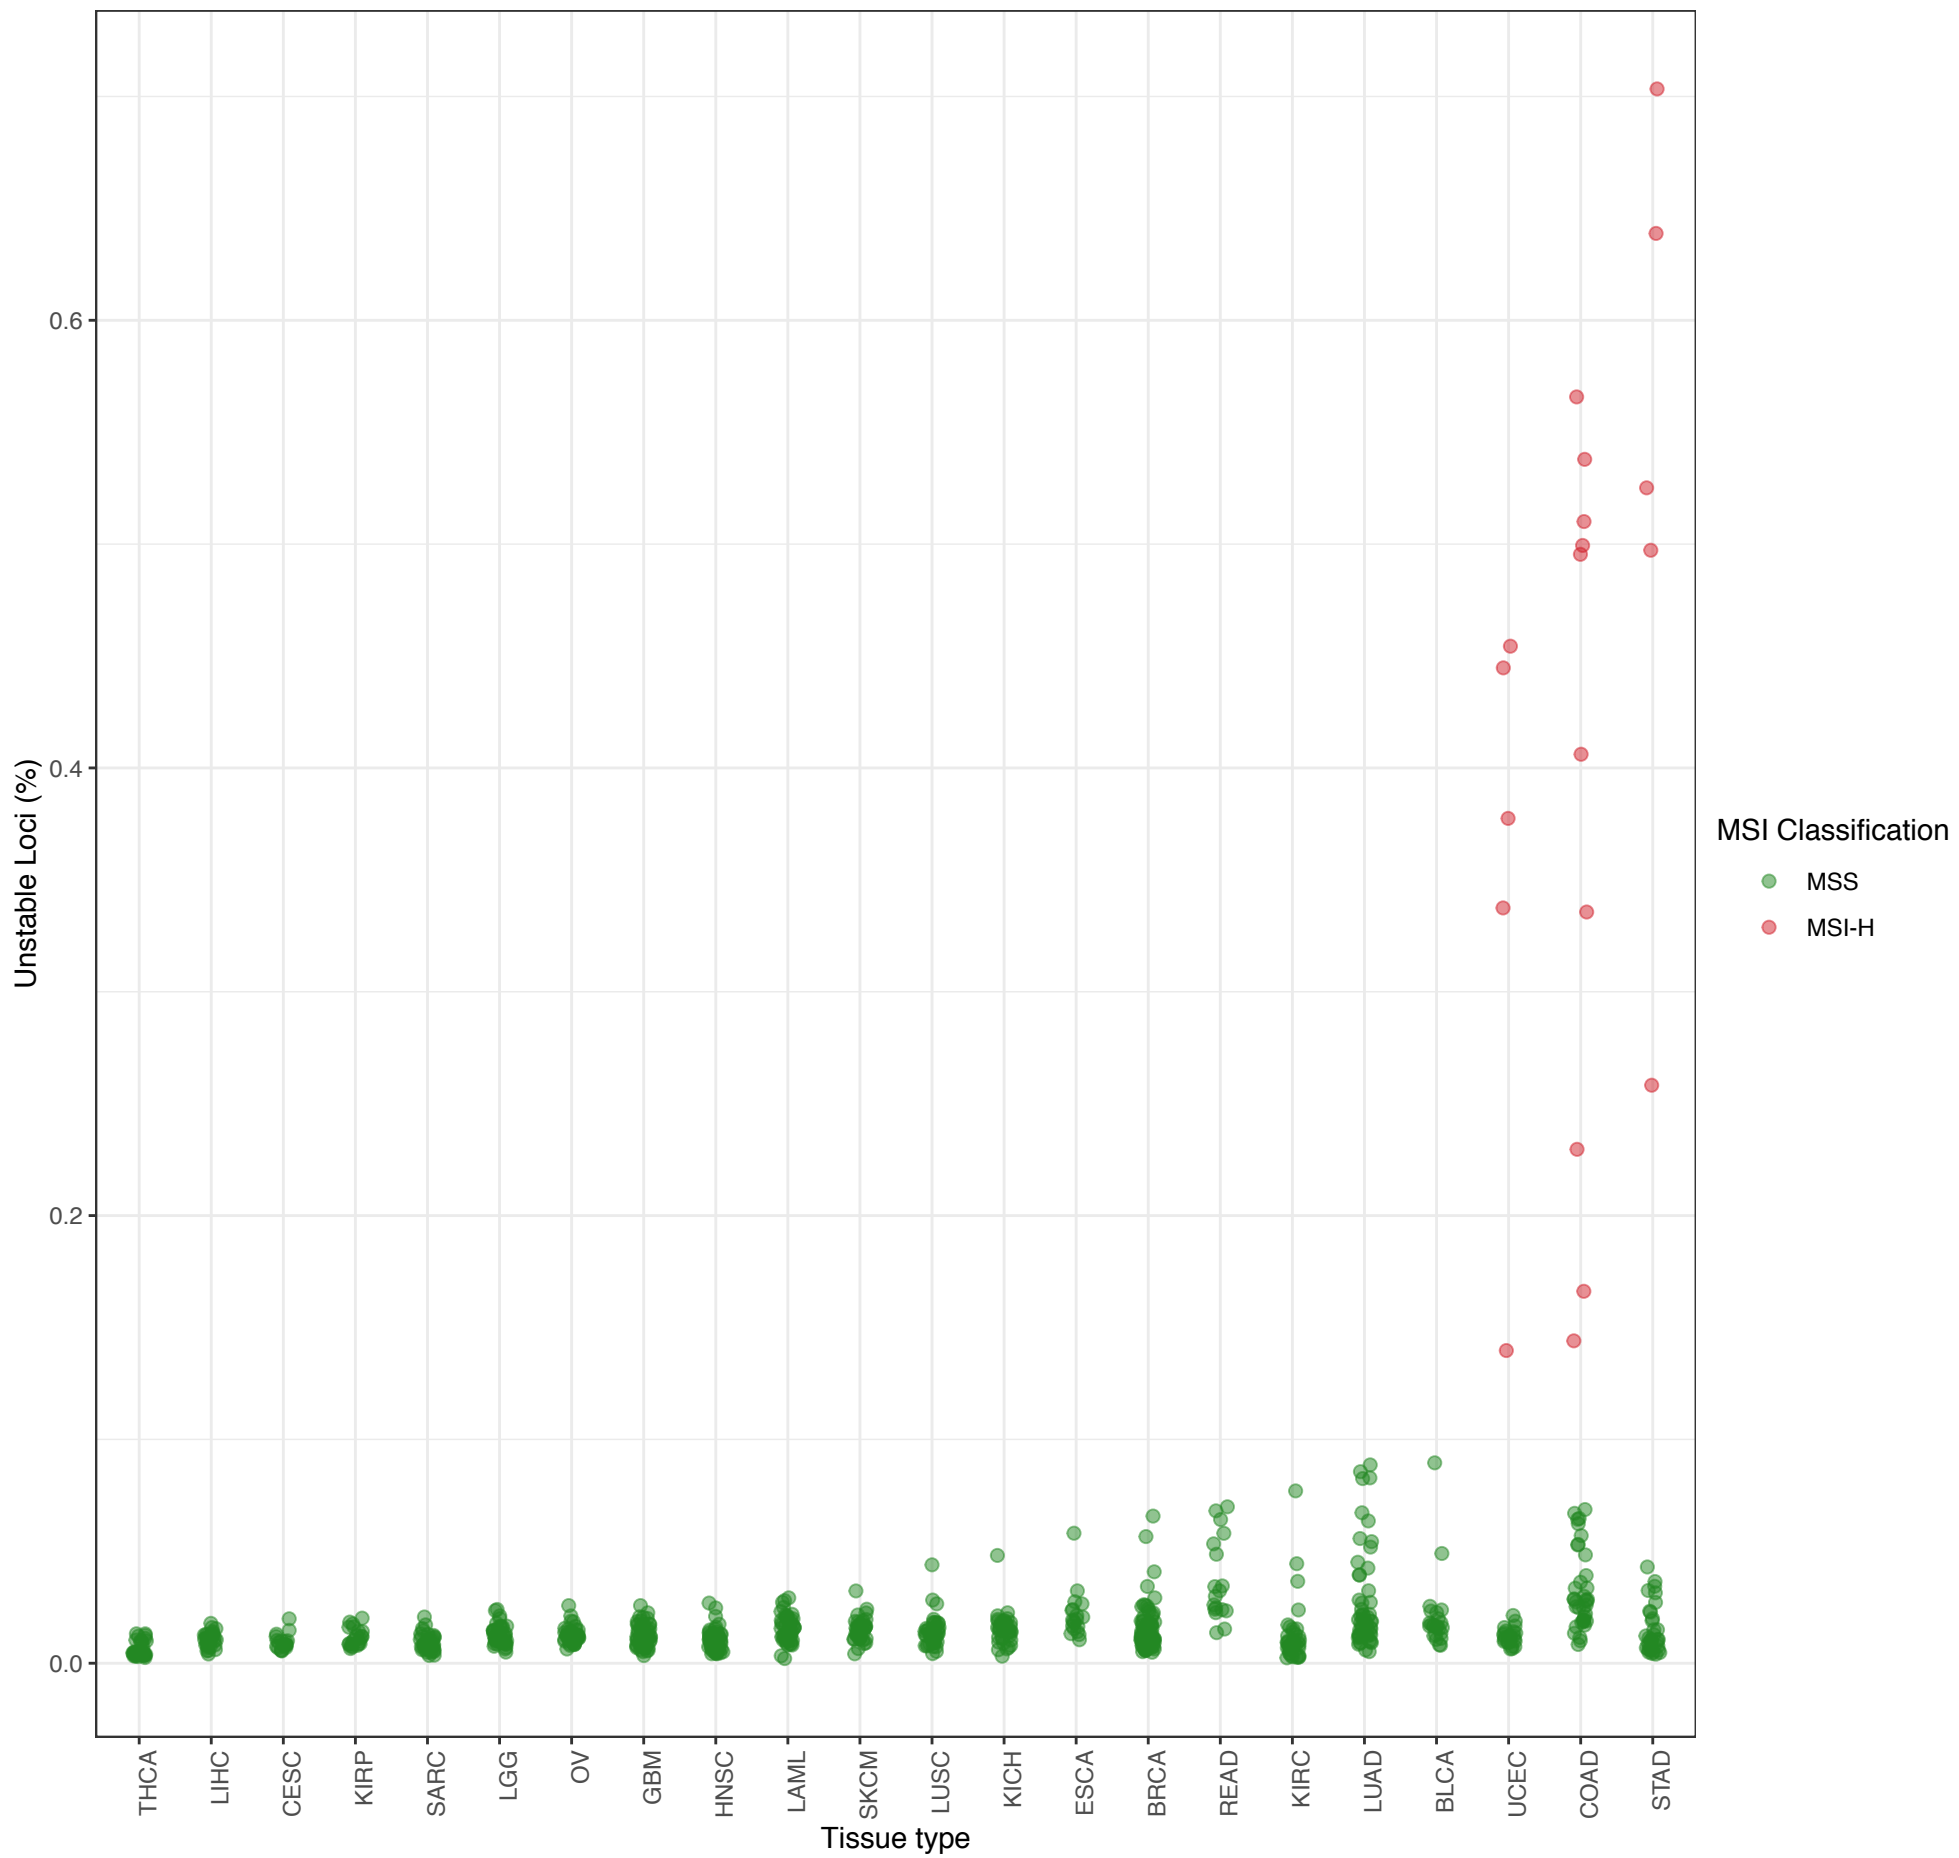

**Supplemental Table 1. Inferred MSI diagnosis for tumors from exome sequencing**

| <b>TCGA ID</b> | <b>MSI diagnosis</b> | <b>Cancer type</b> |
|----------------|----------------------|--------------------|
| TCGA-02-0003   | MSS                  | GBM                |
| TCGA-02-0033   | MSS                  | GBM                |
| TCGA-02-0047   | MSS                  | GBM                |
| TCGA-02-0055   | MSS                  | GBM                |
| TCGA-02-2466   | MSS                  | GBM                |
| TCGA-02-2470   | MSI-H                | GBM                |
| TCGA-02-2483   | MSS                  | GBM                |
| TCGA-02-2485   | MSS                  | GBM                |
| TCGA-02-2486   | MSS                  | GBM                |
| TCGA-04-1331   | MSS                  | OV                 |
| TCGA-04-1332   | MSS                  | OV                 |
| TCGA-04-1336   | MSS                  | OV                 |
| TCGA-04-1342   | Intermediate         | OV                 |
| TCGA-04-1343   | MSS                  | OV                 |
| TCGA-04-1346   | MSS                  | OV                 |
| TCGA-04-1347   | MSS                  | OV                 |
| TCGA-04-1348   | MSS                  | OV                 |
| TCGA-04-1349   | MSS                  | OV                 |
| TCGA-04-1353   | MSS                  | OV                 |
| TCGA-04-1356   | MSS                  | OV                 |
| TCGA-04-1357   | MSS                  | OV                 |
| TCGA-04-1361   | MSS                  | OV                 |
| TCGA-04-1362   | MSS                  | OV                 |
| TCGA-04-1367   | MSS                  | OV                 |
| TCGA-04-1369   | MSS                  | OV                 |
| TCGA-04-1516   | MSS                  | OV                 |
| TCGA-04-1542   | MSS                  | OV                 |
| TCGA-04-1638   | MSS                  | OV                 |
| TCGA-04-1644   | MSS                  | OV                 |
| TCGA-04-1646   | Intermediate         | OV                 |
| TCGA-04-1648   | MSS                  | OV                 |
| TCGA-04-1649   | MSS                  | OV                 |
| TCGA-04-1651   | MSS                  | OV                 |
| TCGA-04-1652   | Intermediate         | OV                 |
| TCGA-04-1655   | MSS                  | OV                 |
| TCGA-05-4244   | MSS                  | LUAD               |
| TCGA-05-4249   | MSS                  | LUAD               |
| TCGA-05-4250   | MSS                  | LUAD               |
| TCGA-05-4382   | MSS                  | LUAD               |
| TCGA-05-4384   | MSS                  | LUAD               |
| TCGA-05-4389   | MSS                  | LUAD               |
| TCGA-05-4390   | MSS                  | LUAD               |
| TCGA-05-4395   | MSS                  | LUAD               |
| TCGA-05-4396   | MSS                  | LUAD               |
| TCGA-05-4397   | MSS                  | LUAD               |
| TCGA-05-4398   | MSS                  | LUAD               |
| TCGA-05-4402   | MSS                  | LUAD               |
| TCGA-05-4403   | MSS                  | LUAD               |
| TCGA-05-4405   | MSS                  | LUAD               |
| TCGA-05-4410   | MSS                  | LUAD               |

|              |              |      |
|--------------|--------------|------|
| TCGA-05-4415 | MSS          | LUAD |
| TCGA-05-4417 | MSS          | LUAD |
| TCGA-05-4418 | MSS          | LUAD |
| TCGA-05-4420 | MSS          | LUAD |
| TCGA-05-4422 | MSS          | LUAD |
| TCGA-05-4424 | MSS          | LUAD |
| TCGA-05-4425 | MSS          | LUAD |
| TCGA-05-4426 | MSS          | LUAD |
| TCGA-05-4427 | MSS          | LUAD |
| TCGA-05-4430 | MSS          | LUAD |
| TCGA-05-4432 | MSS          | LUAD |
| TCGA-05-4433 | MSS          | LUAD |
| TCGA-05-4434 | MSS          | LUAD |
| TCGA-05-5420 | MSS          | LUAD |
| TCGA-05-5423 | MSS          | LUAD |
| TCGA-05-5425 | MSS          | LUAD |
| TCGA-05-5428 | MSS          | LUAD |
| TCGA-05-5429 | MSS          | LUAD |
| TCGA-05-5715 | MSS          | LUAD |
| TCGA-06-0119 | MSS          | GBM  |
| TCGA-06-0122 | MSS          | GBM  |
| TCGA-06-0124 | MSS          | GBM  |
| TCGA-06-0125 | MSI-H        | GBM  |
| TCGA-06-0125 | MSS          | GBM  |
| TCGA-06-0126 | MSS          | GBM  |
| TCGA-06-0128 | MSS          | GBM  |
| TCGA-06-0129 | MSS          | GBM  |
| TCGA-06-0130 | MSS          | GBM  |
| TCGA-06-0132 | MSS          | GBM  |
| TCGA-06-0137 | MSS          | GBM  |
| TCGA-06-0139 | MSS          | GBM  |
| TCGA-06-0140 | MSS          | GBM  |
| TCGA-06-0141 | MSS          | GBM  |
| TCGA-06-0142 | MSS          | GBM  |
| TCGA-06-0145 | MSS          | GBM  |
| TCGA-06-0151 | MSS          | GBM  |
| TCGA-06-0152 | MSS          | GBM  |
| TCGA-06-0154 | MSS          | GBM  |
| TCGA-06-0155 | MSS          | GBM  |
| TCGA-06-0156 | MSS          | GBM  |
| TCGA-06-0157 | MSS          | GBM  |
| TCGA-06-0158 | MSS          | GBM  |
| TCGA-06-0165 | MSS          | GBM  |
| TCGA-06-0166 | MSS          | GBM  |
| TCGA-06-0167 | MSS          | GBM  |
| TCGA-06-0168 | MSS          | GBM  |
| TCGA-06-0169 | MSS          | GBM  |
| TCGA-06-0171 | MSI-H        | GBM  |
| TCGA-06-0171 | MSS          | GBM  |
| TCGA-06-0173 | MSS          | GBM  |
| TCGA-06-0174 | Intermediate | GBM  |
| TCGA-06-0176 | MSS          | GBM  |

|              |       |     |
|--------------|-------|-----|
| TCGA-06-0178 | MSS   | GBM |
| TCGA-06-0184 | MSS   | GBM |
| TCGA-06-0185 | MSS   | GBM |
| TCGA-06-0187 | MSI-H | GBM |
| TCGA-06-0188 | MSS   | GBM |
| TCGA-06-0189 | MSS   | GBM |
| TCGA-06-0190 | MSS   | GBM |
| TCGA-06-0190 | MSI-H | GBM |
| TCGA-06-0192 | MSS   | GBM |
| TCGA-06-0195 | MSS   | GBM |
| TCGA-06-0209 | MSS   | GBM |
| TCGA-06-0210 | MSS   | GBM |
| TCGA-06-0210 | MSI-H | GBM |
| TCGA-06-0211 | MSS   | GBM |
| TCGA-06-0213 | MSS   | GBM |
| TCGA-06-0214 | MSS   | GBM |
| TCGA-06-0216 | MSS   | GBM |
| TCGA-06-0219 | MSS   | GBM |
| TCGA-06-0221 | MSI-H | GBM |
| TCGA-06-0221 | MSS   | GBM |
| TCGA-06-0237 | MSS   | GBM |
| TCGA-06-0238 | MSS   | GBM |
| TCGA-06-0240 | MSS   | GBM |
| TCGA-06-0241 | MSS   | GBM |
| TCGA-06-0644 | MSS   | GBM |
| TCGA-06-0645 | MSS   | GBM |
| TCGA-06-0646 | MSS   | GBM |
| TCGA-06-0648 | MSS   | GBM |
| TCGA-06-0649 | MSS   | GBM |
| TCGA-06-0650 | MSS   | GBM |
| TCGA-06-0686 | MSS   | GBM |
| TCGA-06-0743 | MSS   | GBM |
| TCGA-06-0744 | MSS   | GBM |
| TCGA-06-0745 | MSS   | GBM |
| TCGA-06-0747 | MSS   | GBM |
| TCGA-06-0749 | MSS   | GBM |
| TCGA-06-0750 | MSS   | GBM |
| TCGA-06-0875 | MSS   | GBM |
| TCGA-06-0876 | MSS   | GBM |
| TCGA-06-0877 | MSS   | GBM |
| TCGA-06-0878 | MSS   | GBM |
| TCGA-06-0879 | MSS   | GBM |
| TCGA-06-0881 | MSS   | GBM |
| TCGA-06-0882 | MSS   | GBM |
| TCGA-06-0939 | MSS   | GBM |
| TCGA-06-1084 | MSS   | GBM |
| TCGA-06-1087 | MSS   | GBM |
| TCGA-06-1800 | MSS   | GBM |
| TCGA-06-1804 | MSS   | GBM |
| TCGA-06-1806 | MSS   | GBM |
| TCGA-06-2557 | MSS   | GBM |
| TCGA-06-2558 | MSS   | GBM |

|              |              |     |
|--------------|--------------|-----|
| TCGA-06-2559 | MSS          | GBM |
| TCGA-06-2561 | Intermediate | GBM |
| TCGA-06-2562 | MSS          | GBM |
| TCGA-06-2563 | MSI-H        | GBM |
| TCGA-06-2564 | MSS          | GBM |
| TCGA-06-2565 | MSS          | GBM |
| TCGA-06-2566 | MSS          | GBM |
| TCGA-06-2567 | MSS          | GBM |
| TCGA-06-2569 | MSS          | GBM |
| TCGA-06-2570 | MSS          | GBM |
| TCGA-06-5408 | MSS          | GBM |
| TCGA-06-5410 | MSS          | GBM |
| TCGA-06-5411 | MSS          | GBM |
| TCGA-06-5412 | MSS          | GBM |
| TCGA-06-5413 | MSS          | GBM |
| TCGA-06-5414 | MSS          | GBM |
| TCGA-06-5415 | MSS          | GBM |
| TCGA-06-5416 | MSS          | GBM |
| TCGA-06-5417 | MSS          | GBM |
| TCGA-06-5418 | MSS          | GBM |
| TCGA-06-5856 | MSS          | GBM |
| TCGA-06-5858 | MSS          | GBM |
| TCGA-06-5859 | MSS          | GBM |
| TCGA-06-6388 | MSS          | GBM |
| TCGA-06-6389 | MSS          | GBM |
| TCGA-06-6390 | MSS          | GBM |
| TCGA-06-6391 | MSS          | GBM |
| TCGA-06-6693 | MSS          | GBM |
| TCGA-06-6694 | MSS          | GBM |
| TCGA-06-6695 | MSS          | GBM |
| TCGA-06-6697 | MSS          | GBM |
| TCGA-06-6698 | MSS          | GBM |
| TCGA-06-6699 | MSS          | GBM |
| TCGA-06-6700 | MSS          | GBM |
| TCGA-06-6701 | MSS          | GBM |
| TCGA-06-A5U0 | MSS          | GBM |
| TCGA-06-A5U1 | MSS          | GBM |
| TCGA-06-A6S0 | MSS          | GBM |
| TCGA-06-A6S1 | MSS          | GBM |
| TCGA-06-A7TK | MSS          | GBM |
| TCGA-06-A7TL | MSS          | GBM |
| TCGA-08-0386 | MSS          | GBM |
| TCGA-09-0365 | MSS          | OV  |
| TCGA-09-0366 | Intermediate | OV  |
| TCGA-09-0369 | MSS          | OV  |
| TCGA-09-1664 | Intermediate | OV  |
| TCGA-09-1670 | MSS          | OV  |
| TCGA-09-1672 | MSS          | OV  |
| TCGA-09-1673 | MSS          | OV  |
| TCGA-09-1674 | Intermediate | OV  |
| TCGA-09-1675 | MSS          | OV  |
| TCGA-09-2043 | MSS          | OV  |

|              |              |     |
|--------------|--------------|-----|
| TCGA-09-2044 | MSS          | OV  |
| TCGA-09-2045 | MSS          | OV  |
| TCGA-09-2049 | MSS          | OV  |
| TCGA-09-2050 | MSS          | OV  |
| TCGA-09-2051 | MSS          | OV  |
| TCGA-09-2053 | MSS          | OV  |
| TCGA-09-2055 | MSS          | OV  |
| TCGA-09-2056 | MSS          | OV  |
| TCGA-10-0930 | MSS          | OV  |
| TCGA-10-0931 | MSI-H        | OV  |
| TCGA-10-0933 | MSS          | OV  |
| TCGA-10-0934 | Intermediate | OV  |
| TCGA-10-0935 | Intermediate | OV  |
| TCGA-12-0615 | MSS          | GBM |
| TCGA-12-0616 | MSS          | GBM |
| TCGA-12-0618 | MSS          | GBM |
| TCGA-12-0619 | MSS          | GBM |
| TCGA-12-0656 | MSS          | GBM |
| TCGA-12-0657 | MSS          | GBM |
| TCGA-12-0662 | MSS          | GBM |
| TCGA-12-0670 | MSS          | GBM |
| TCGA-12-0688 | MSS          | GBM |
| TCGA-12-0691 | MSS          | GBM |
| TCGA-12-0692 | MSS          | GBM |
| TCGA-12-0707 | MSS          | GBM |
| TCGA-12-0773 | MSS          | GBM |
| TCGA-12-0775 | MSS          | GBM |
| TCGA-12-0778 | MSS          | GBM |
| TCGA-12-0818 | MSS          | GBM |
| TCGA-12-0819 | MSS          | GBM |
| TCGA-12-0820 | MSS          | GBM |
| TCGA-12-0821 | MSS          | GBM |
| TCGA-12-0822 | MSS          | GBM |
| TCGA-12-0826 | MSS          | GBM |
| TCGA-12-0827 | MSS          | GBM |
| TCGA-12-0828 | MSS          | GBM |
| TCGA-12-1088 | MSS          | GBM |
| TCGA-12-1089 | MSS          | GBM |
| TCGA-12-1092 | MSS          | GBM |
| TCGA-12-1093 | MSS          | GBM |
| TCGA-12-1598 | MSS          | GBM |
| TCGA-12-1599 | MSS          | GBM |
| TCGA-12-1600 | MSS          | GBM |
| TCGA-12-1602 | MSS          | GBM |
| TCGA-12-3646 | MSS          | GBM |
| TCGA-12-3648 | MSS          | GBM |
| TCGA-12-3649 | MSS          | GBM |
| TCGA-12-3650 | MSS          | GBM |
| TCGA-12-3651 | MSS          | GBM |
| TCGA-12-3652 | MSS          | GBM |
| TCGA-12-3653 | MSS          | GBM |
| TCGA-12-5295 | MSS          | GBM |



|              |              |     |
|--------------|--------------|-----|
| TCGA-12-5299 | MSS          | GBM |
| TCGA-12-5301 | MSS          | GBM |
| TCGA-13-0723 | MSS          | OV  |
| TCGA-13-0724 | Intermediate | OV  |
| TCGA-13-0726 | Intermediate | OV  |
| TCGA-13-0751 | Intermediate | OV  |
| TCGA-13-0755 | MSS          | OV  |
| TCGA-13-0760 | MSS          | OV  |
| TCGA-13-0765 | MSS          | OV  |
| TCGA-13-0791 | MSS          | OV  |
| TCGA-13-0795 | MSS          | OV  |
| TCGA-13-0800 | MSS          | OV  |
| TCGA-13-0804 | Intermediate | OV  |
| TCGA-13-0807 | MSS          | OV  |
| TCGA-13-0884 | MSS          | OV  |
| TCGA-13-0885 | Intermediate | OV  |
| TCGA-13-0887 | Intermediate | OV  |
| TCGA-13-0888 | MSS          | OV  |
| TCGA-13-0890 | MSS          | OV  |
| TCGA-13-0893 | MSS          | OV  |
| TCGA-13-0894 | MSS          | OV  |
| TCGA-13-0897 | MSS          | OV  |
| TCGA-13-0903 | MSS          | OV  |
| TCGA-13-0905 | MSS          | OV  |
| TCGA-13-0908 | MSS          | OV  |
| TCGA-13-0910 | MSS          | OV  |
| TCGA-13-0912 | MSS          | OV  |
| TCGA-13-0920 | MSS          | OV  |
| TCGA-13-0923 | MSS          | OV  |
| TCGA-13-0924 | Intermediate | OV  |
| TCGA-13-1403 | MSS          | OV  |
| TCGA-13-1404 | MSS          | OV  |
| TCGA-13-1405 | MSS          | OV  |
| TCGA-13-1409 | MSS          | OV  |
| TCGA-13-1411 | MSS          | OV  |
| TCGA-13-1412 | MSS          | OV  |
| TCGA-13-1481 | MSS          | OV  |
| TCGA-13-1482 | MSS          | OV  |
| TCGA-13-1483 | MSS          | OV  |
| TCGA-13-1484 | MSS          | OV  |
| TCGA-13-1488 | MSS          | OV  |
| TCGA-13-1491 | MSS          | OV  |
| TCGA-13-1494 | MSS          | OV  |
| TCGA-13-1495 | MSS          | OV  |
| TCGA-13-1496 | MSS          | OV  |
| TCGA-13-1497 | MSS          | OV  |
| TCGA-13-1498 | MSS          | OV  |
| TCGA-13-1499 | MSS          | OV  |
| TCGA-13-1500 | MSS          | OV  |
| TCGA-13-1501 | MSS          | OV  |
| TCGA-13-1504 | MSS          | OV  |
| TCGA-13-1506 | MSS          | OV  |

|              |       |     |
|--------------|-------|-----|
| TCGA-13-1507 | MSS   | OV  |
| TCGA-13-1509 | MSS   | OV  |
| TCGA-13-1512 | MSS   | OV  |
| TCGA-13-2057 | MSS   | OV  |
| TCGA-13-2059 | MSS   | OV  |
| TCGA-13-2060 | MSS   | OV  |
| TCGA-13-2061 | MSS   | OV  |
| TCGA-13-2065 | MSS   | OV  |
| TCGA-13-2066 | MSS   | OV  |
| TCGA-13-2071 | MSS   | OV  |
| TCGA-13-A5FT | MSS   | OV  |
| TCGA-13-A5FU | MSS   | OV  |
| TCGA-14-0736 | MSS   | GBM |
| TCGA-14-0740 | MSS   | GBM |
| TCGA-14-0781 | MSS   | GBM |
| TCGA-14-0786 | MSS   | GBM |
| TCGA-14-0787 | MSS   | GBM |
| TCGA-14-0789 | MSS   | GBM |
| TCGA-14-0790 | MSS   | GBM |
| TCGA-14-0812 | MSS   | GBM |
| TCGA-14-0813 | MSS   | GBM |
| TCGA-14-0817 | MSS   | GBM |
| TCGA-14-0862 | MSS   | GBM |
| TCGA-14-0865 | MSS   | GBM |
| TCGA-14-0866 | MSS   | GBM |
| TCGA-14-0867 | MSS   | GBM |
| TCGA-14-0871 | MSS   | GBM |
| TCGA-14-1034 | MSI-H | GBM |
| TCGA-14-1034 | MSS   | GBM |
| TCGA-14-1037 | MSS   | GBM |
| TCGA-14-1043 | MSS   | GBM |
| TCGA-14-1395 | MSS   | GBM |
| TCGA-14-1450 | MSS   | GBM |
| TCGA-14-1451 | MSS   | GBM |
| TCGA-14-1453 | MSS   | GBM |
| TCGA-14-1455 | MSS   | GBM |
| TCGA-14-1456 | MSS   | GBM |
| TCGA-14-1794 | MSS   | GBM |
| TCGA-14-1821 | MSS   | GBM |
| TCGA-14-1823 | MSS   | GBM |
| TCGA-14-1825 | MSS   | GBM |
| TCGA-14-1827 | MSS   | GBM |
| TCGA-14-1829 | MSS   | GBM |
| TCGA-14-2554 | MSS   | GBM |
| TCGA-14-3476 | MSS   | GBM |
| TCGA-14-4157 | MSS   | GBM |
| TCGA-15-0742 | MSS   | GBM |
| TCGA-15-1444 | MSS   | GBM |
| TCGA-16-0846 | MSS   | GBM |
| TCGA-16-0848 | MSS   | GBM |
| TCGA-16-0849 | MSS   | GBM |
| TCGA-16-0850 | MSS   | GBM |

|              |              |      |
|--------------|--------------|------|
| TCGA-16-0861 | MSS          | GBM  |
| TCGA-16-1045 | MSS          | GBM  |
| TCGA-16-1048 | MSS          | GBM  |
| TCGA-16-1460 | MSS          | GBM  |
| TCGA-17-Z000 | MSS          | LUAD |
| TCGA-17-Z001 | MSS          | LUAD |
| TCGA-17-Z002 | MSS          | LUAD |
| TCGA-17-Z003 | MSS          | LUAD |
| TCGA-17-Z004 | MSS          | LUAD |
| TCGA-17-Z005 | MSS          | LUAD |
| TCGA-17-Z007 | Intermediate | LUAD |
| TCGA-17-Z009 | MSS          | LUAD |
| TCGA-17-Z010 | MSS          | LUAD |
| TCGA-17-Z011 | MSS          | LUAD |
| TCGA-17-Z013 | MSS          | LUAD |
| TCGA-17-Z014 | MSS          | LUAD |
| TCGA-17-Z015 | MSS          | LUAD |
| TCGA-17-Z016 | Intermediate | LUAD |
| TCGA-17-Z017 | MSS          | LUAD |
| TCGA-17-Z018 | MSS          | LUAD |
| TCGA-17-Z019 | MSS          | LUAD |
| TCGA-17-Z020 | MSS          | LUAD |
| TCGA-17-Z022 | MSI-H        | LUAD |
| TCGA-17-Z023 | MSS          | LUAD |
| TCGA-17-Z025 | Intermediate | LUAD |
| TCGA-17-Z026 | MSS          | LUAD |
| TCGA-17-Z027 | MSS          | LUAD |
| TCGA-17-Z028 | MSS          | LUAD |
| TCGA-17-Z030 | MSS          | LUAD |
| TCGA-17-Z031 | MSS          | LUAD |
| TCGA-17-Z032 | Intermediate | LUAD |
| TCGA-17-Z033 | MSS          | LUAD |
| TCGA-17-Z036 | MSI-H        | LUAD |
| TCGA-17-Z037 | MSS          | LUAD |
| TCGA-17-Z041 | MSS          | LUAD |
| TCGA-17-Z042 | MSS          | LUAD |
| TCGA-17-Z043 | MSS          | LUAD |
| TCGA-17-Z044 | MSS          | LUAD |
| TCGA-17-Z045 | MSS          | LUAD |
| TCGA-17-Z047 | MSS          | LUAD |
| TCGA-17-Z048 | MSS          | LUAD |
| TCGA-17-Z049 | MSS          | LUAD |
| TCGA-17-Z050 | MSS          | LUAD |
| TCGA-17-Z051 | MSS          | LUAD |
| TCGA-17-Z052 | MSS          | LUAD |
| TCGA-17-Z053 | MSS          | LUAD |
| TCGA-17-Z054 | MSS          | LUAD |
| TCGA-17-Z055 | MSS          | LUAD |
| TCGA-17-Z056 | MSS          | LUAD |
| TCGA-17-Z057 | MSS          | LUAD |
| TCGA-17-Z058 | MSS          | LUAD |
| TCGA-17-Z059 | MSS          | LUAD |

|              |              |      |
|--------------|--------------|------|
| TCGA-17-Z060 | MSS          | LUAD |
| TCGA-17-Z061 | MSS          | LUAD |
| TCGA-17-Z062 | MSS          | LUAD |
| TCGA-18-3406 | MSS          | LUSC |
| TCGA-18-3407 | MSS          | LUSC |
| TCGA-18-3409 | MSS          | LUSC |
| TCGA-18-3410 | MSS          | LUSC |
| TCGA-18-3411 | MSS          | LUSC |
| TCGA-18-3412 | MSS          | LUSC |
| TCGA-18-3414 | MSS          | LUSC |
| TCGA-18-3415 | MSS          | LUSC |
| TCGA-18-3416 | MSS          | LUSC |
| TCGA-18-3417 | MSS          | LUSC |
| TCGA-18-3419 | MSS          | LUSC |
| TCGA-18-3421 | MSS          | LUSC |
| TCGA-18-4083 | MSS          | LUSC |
| TCGA-18-4086 | MSS          | LUSC |
| TCGA-18-4721 | MSS          | LUSC |
| TCGA-18-5592 | MSS          | LUSC |
| TCGA-18-5595 | MSS          | LUSC |
| TCGA-19-0957 | MSS          | GBM  |
| TCGA-19-0957 | MSI-H        | GBM  |
| TCGA-19-1387 | MSS          | GBM  |
| TCGA-19-1389 | Intermediate | GBM  |
| TCGA-19-1786 | MSS          | GBM  |
| TCGA-19-1787 | Intermediate | GBM  |
| TCGA-19-1789 | MSS          | GBM  |
| TCGA-19-1790 | MSS          | GBM  |
| TCGA-19-2620 | MSS          | GBM  |
| TCGA-19-2624 | MSS          | GBM  |
| TCGA-19-2629 | MSS          | GBM  |
| TCGA-19-2631 | MSS          | GBM  |
| TCGA-19-4065 | MSS          | GBM  |
| TCGA-19-4068 | MSS          | GBM  |
| TCGA-19-5947 | MSS          | GBM  |
| TCGA-19-5950 | MSS          | GBM  |
| TCGA-19-5951 | MSS          | GBM  |
| TCGA-19-5952 | MSS          | GBM  |
| TCGA-19-5953 | MSS          | GBM  |
| TCGA-19-5954 | MSS          | GBM  |
| TCGA-19-5955 | MSS          | GBM  |
| TCGA-19-5956 | MSS          | GBM  |
| TCGA-19-5958 | MSS          | GBM  |
| TCGA-19-5959 | MSS          | GBM  |
| TCGA-19-5960 | MSS          | GBM  |
| TCGA-19-A60I | MSS          | GBM  |
| TCGA-19-A6J4 | MSS          | GBM  |
| TCGA-19-A6J5 | MSS          | GBM  |
| TCGA-20-0987 | MSI-H        | OV   |
| TCGA-20-0990 | MSS          | OV   |
| TCGA-20-0991 | MSS          | OV   |
| TCGA-20-0996 | MSS          | OV   |

|              |              |      |
|--------------|--------------|------|
| TCGA-20-1682 | MSS          | OV   |
| TCGA-20-1683 | MSS          | OV   |
| TCGA-20-1684 | Intermediate | OV   |
| TCGA-20-1685 | MSS          | OV   |
| TCGA-20-1686 | MSS          | OV   |
| TCGA-20-1687 | MSS          | OV   |
| TCGA-21-1070 | MSS          | LUSC |
| TCGA-21-1071 | MSS          | LUSC |
| TCGA-21-1075 | MSS          | LUSC |
| TCGA-21-1076 | MSI-H        | LUSC |
| TCGA-21-1077 | MSS          | LUSC |
| TCGA-21-1078 | MSS          | LUSC |
| TCGA-21-1079 | MSS          | LUSC |
| TCGA-21-1080 | MSI-H        | LUSC |
| TCGA-21-1081 | MSI-H        | LUSC |
| TCGA-21-1082 | MSS          | LUSC |
| TCGA-21-1083 | MSS          | LUSC |
| TCGA-21-5782 | MSS          | LUSC |
| TCGA-21-5784 | MSS          | LUSC |
| TCGA-21-5786 | MSS          | LUSC |
| TCGA-21-5787 | MSS          | LUSC |
| TCGA-21-A5DI | MSS          | LUSC |
| TCGA-22-0940 | MSS          | LUSC |
| TCGA-22-0944 | MSS          | LUSC |
| TCGA-22-1000 | MSS          | LUSC |
| TCGA-22-1002 | MSS          | LUSC |
| TCGA-22-1005 | MSI-H        | LUSC |
| TCGA-22-1011 | MSI-H        | LUSC |
| TCGA-22-1012 | MSS          | LUSC |
| TCGA-22-1016 | MSS          | LUSC |
| TCGA-22-4591 | Intermediate | LUSC |
| TCGA-22-4593 | MSS          | LUSC |
| TCGA-22-4594 | MSS          | LUSC |
| TCGA-22-4595 | MSS          | LUSC |
| TCGA-22-4596 | MSS          | LUSC |
| TCGA-22-4599 | MSS          | LUSC |
| TCGA-22-4601 | MSS          | LUSC |
| TCGA-22-4604 | MSS          | LUSC |
| TCGA-22-4605 | MSS          | LUSC |
| TCGA-22-4607 | MSS          | LUSC |
| TCGA-22-4609 | Intermediate | LUSC |
| TCGA-22-4613 | MSS          | LUSC |
| TCGA-22-5471 | MSS          | LUSC |
| TCGA-22-5472 | MSS          | LUSC |
| TCGA-22-5473 | MSS          | LUSC |
| TCGA-22-5474 | MSS          | LUSC |
| TCGA-22-5477 | MSS          | LUSC |
| TCGA-22-5478 | MSS          | LUSC |
| TCGA-22-5479 | MSS          | LUSC |
| TCGA-22-5480 | MSS          | LUSC |
| TCGA-22-5481 | MSS          | LUSC |
| TCGA-22-5482 | MSS          | LUSC |

|              |              |      |
|--------------|--------------|------|
| TCGA-22-5483 | MSS          | LUSC |
| TCGA-22-5485 | MSS          | LUSC |
| TCGA-22-5489 | MSS          | LUSC |
| TCGA-22-5491 | MSS          | LUSC |
| TCGA-22-5492 | MSS          | LUSC |
| TCGA-22-A5C4 | MSS          | LUSC |
| TCGA-23-1021 | MSS          | OV   |
| TCGA-23-1022 | MSS          | OV   |
| TCGA-23-1027 | Intermediate | OV   |
| TCGA-23-1029 | MSS          | OV   |
| TCGA-23-1030 | MSS          | OV   |
| TCGA-23-1031 | MSS          | OV   |
| TCGA-23-1032 | MSS          | OV   |
| TCGA-23-1110 | MSS          | OV   |
| TCGA-23-1111 | MSS          | OV   |
| TCGA-23-1113 | MSS          | OV   |
| TCGA-23-1114 | MSS          | OV   |
| TCGA-23-1116 | MSS          | OV   |
| TCGA-23-1117 | MSS          | OV   |
| TCGA-23-1118 | MSS          | OV   |
| TCGA-23-1121 | MSS          | OV   |
| TCGA-23-1122 | MSS          | OV   |
| TCGA-23-1123 | MSS          | OV   |
| TCGA-23-1124 | MSS          | OV   |
| TCGA-23-1809 | MSS          | OV   |
| TCGA-23-2072 | MSS          | OV   |
| TCGA-23-2077 | MSS          | OV   |
| TCGA-23-2078 | MSS          | OV   |
| TCGA-23-2079 | MSS          | OV   |
| TCGA-23-2081 | MSI-H        | OV   |
| TCGA-23-2641 | MSS          | OV   |
| TCGA-23-2643 | MSS          | OV   |
| TCGA-23-2645 | MSS          | OV   |
| TCGA-23-2647 | MSS          | OV   |
| TCGA-23-2649 | MSS          | OV   |
| TCGA-24-0966 | MSS          | OV   |
| TCGA-24-0970 | MSS          | OV   |
| TCGA-24-0975 | MSS          | OV   |
| TCGA-24-0979 | Intermediate | OV   |
| TCGA-24-0980 | Intermediate | OV   |
| TCGA-24-0982 | Intermediate | OV   |
| TCGA-24-1103 | MSS          | OV   |
| TCGA-24-1104 | MSS          | OV   |
| TCGA-24-1413 | MSS          | OV   |
| TCGA-24-1416 | MSS          | OV   |
| TCGA-24-1417 | MSS          | OV   |
| TCGA-24-1418 | MSS          | OV   |
| TCGA-24-1419 | MSS          | OV   |
| TCGA-24-1422 | MSS          | OV   |
| TCGA-24-1423 | MSS          | OV   |
| TCGA-24-1424 | MSS          | OV   |
| TCGA-24-1425 | MSS          | OV   |

|              |              |    |
|--------------|--------------|----|
| TCGA-24-1426 | MSS          | OV |
| TCGA-24-1427 | MSS          | OV |
| TCGA-24-1428 | MSS          | OV |
| TCGA-24-1430 | MSS          | OV |
| TCGA-24-1431 | MSS          | OV |
| TCGA-24-1434 | MSS          | OV |
| TCGA-24-1435 | MSS          | OV |
| TCGA-24-1436 | MSS          | OV |
| TCGA-24-1463 | MSS          | OV |
| TCGA-24-1464 | MSS          | OV |
| TCGA-24-1469 | MSS          | OV |
| TCGA-24-1470 | MSS          | OV |
| TCGA-24-1471 | MSS          | OV |
| TCGA-24-1474 | MSS          | OV |
| TCGA-24-1549 | MSS          | OV |
| TCGA-24-1551 | MSS          | OV |
| TCGA-24-1552 | MSS          | OV |
| TCGA-24-1562 | MSS          | OV |
| TCGA-24-1563 | MSS          | OV |
| TCGA-24-1564 | MSS          | OV |
| TCGA-24-1565 | MSS          | OV |
| TCGA-24-1603 | MSS          | OV |
| TCGA-24-1616 | MSS          | OV |
| TCGA-24-1842 | MSS          | OV |
| TCGA-24-1843 | MSS          | OV |
| TCGA-24-1844 | MSS          | OV |
| TCGA-24-1845 | MSS          | OV |
| TCGA-24-1846 | MSS          | OV |
| TCGA-24-1847 | MSS          | OV |
| TCGA-24-1849 | MSS          | OV |
| TCGA-24-1850 | MSS          | OV |
| TCGA-24-1927 | MSI-H        | OV |
| TCGA-24-2019 | MSS          | OV |
| TCGA-24-2024 | Intermediate | OV |
| TCGA-24-2030 | Intermediate | OV |
| TCGA-24-2033 | MSS          | OV |
| TCGA-24-2035 | MSI-H        | OV |
| TCGA-24-2038 | MSS          | OV |
| TCGA-24-2254 | MSI-H        | OV |
| TCGA-24-2260 | MSS          | OV |
| TCGA-24-2261 | MSS          | OV |
| TCGA-24-2262 | MSS          | OV |
| TCGA-24-2267 | MSS          | OV |
| TCGA-24-2271 | MSS          | OV |
| TCGA-24-2280 | MSS          | OV |
| TCGA-24-2281 | MSS          | OV |
| TCGA-24-2288 | MSS          | OV |
| TCGA-24-2289 | MSS          | OV |
| TCGA-24-2290 | MSS          | OV |
| TCGA-24-2293 | MSS          | OV |
| TCGA-24-2295 | MSS          | OV |
| TCGA-24-2298 | MSS          | OV |

|              |              |     |
|--------------|--------------|-----|
| TCGA-25-1313 | Intermediate | OV  |
| TCGA-25-1314 | MSS          | OV  |
| TCGA-25-1315 | MSS          | OV  |
| TCGA-25-1316 | MSS          | OV  |
| TCGA-25-1319 | MSS          | OV  |
| TCGA-25-1320 | MSI-H        | OV  |
| TCGA-25-1321 | MSS          | OV  |
| TCGA-25-1322 | MSS          | OV  |
| TCGA-25-1323 | Intermediate | OV  |
| TCGA-25-1326 | Intermediate | OV  |
| TCGA-25-1328 | MSS          | OV  |
| TCGA-25-1329 | Intermediate | OV  |
| TCGA-25-2042 | MSS          | OV  |
| TCGA-25-2391 | MSS          | OV  |
| TCGA-25-2392 | MSS          | OV  |
| TCGA-25-2393 | MSS          | OV  |
| TCGA-25-2396 | MSS          | OV  |
| TCGA-25-2397 | MSS          | OV  |
| TCGA-25-2398 | MSS          | OV  |
| TCGA-25-2399 | MSS          | OV  |
| TCGA-25-2400 | MSS          | OV  |
| TCGA-25-2401 | MSS          | OV  |
| TCGA-25-2404 | MSS          | OV  |
| TCGA-25-2408 | MSS          | OV  |
| TCGA-25-2409 | MSS          | OV  |
| TCGA-26-1439 | MSS          | GBM |
| TCGA-26-1442 | MSS          | GBM |
| TCGA-26-5132 | MSS          | GBM |
| TCGA-26-5133 | MSS          | GBM |
| TCGA-26-5134 | MSS          | GBM |
| TCGA-26-5135 | MSS          | GBM |
| TCGA-26-5136 | MSS          | GBM |
| TCGA-26-5139 | MSS          | GBM |
| TCGA-26-6173 | MSS          | GBM |
| TCGA-26-6174 | MSS          | GBM |
| TCGA-26-A7UX | MSS          | GBM |
| TCGA-27-1830 | MSS          | GBM |
| TCGA-27-1831 | MSI-H        | GBM |
| TCGA-27-1832 | MSS          | GBM |
| TCGA-27-1833 | MSS          | GBM |
| TCGA-27-1834 | MSS          | GBM |
| TCGA-27-1835 | MSS          | GBM |
| TCGA-27-1836 | MSS          | GBM |
| TCGA-27-1837 | MSS          | GBM |
| TCGA-27-1838 | MSI-H        | GBM |
| TCGA-27-2518 | MSS          | GBM |
| TCGA-27-2519 | MSS          | GBM |
| TCGA-27-2521 | MSS          | GBM |
| TCGA-27-2523 | MSS          | GBM |
| TCGA-27-2524 | MSS          | GBM |
| TCGA-27-2526 | MSS          | GBM |
| TCGA-27-2527 | MSS          | GBM |



|              |              |     |
|--------------|--------------|-----|
| TCGA-27-2528 | MSS          | GBM |
| TCGA-28-1746 | MSS          | GBM |
| TCGA-28-1747 | MSS          | GBM |
| TCGA-28-1749 | MSS          | GBM |
| TCGA-28-1752 | MSS          | GBM |
| TCGA-28-1753 | MSI-H        | GBM |
| TCGA-28-1755 | MSS          | GBM |
| TCGA-28-2499 | MSS          | GBM |
| TCGA-28-2501 | MSS          | GBM |
| TCGA-28-2502 | MSS          | GBM |
| TCGA-28-2506 | MSS          | GBM |
| TCGA-28-2509 | MSS          | GBM |
| TCGA-28-2510 | MSS          | GBM |
| TCGA-28-2513 | MSI-H        | GBM |
| TCGA-28-2514 | MSS          | GBM |
| TCGA-28-5204 | MSS          | GBM |
| TCGA-28-5207 | MSS          | GBM |
| TCGA-28-5208 | MSS          | GBM |
| TCGA-28-5209 | MSS          | GBM |
| TCGA-28-5211 | MSS          | GBM |
| TCGA-28-5213 | MSS          | GBM |
| TCGA-28-5214 | MSS          | GBM |
| TCGA-28-5215 | MSS          | GBM |
| TCGA-28-5216 | MSS          | GBM |
| TCGA-28-5218 | MSS          | GBM |
| TCGA-28-5219 | MSS          | GBM |
| TCGA-28-5220 | MSS          | GBM |
| TCGA-28-6450 | MSS          | GBM |
| TCGA-29-1688 | MSI-H        | OV  |
| TCGA-29-1690 | MSI-H        | OV  |
| TCGA-29-1691 | MSS          | OV  |
| TCGA-29-1693 | Intermediate | OV  |
| TCGA-29-1694 | MSI-H        | OV  |
| TCGA-29-1695 | MSS          | OV  |
| TCGA-29-1696 | MSS          | OV  |
| TCGA-29-1697 | MSS          | OV  |
| TCGA-29-1698 | MSS          | OV  |
| TCGA-29-1699 | MSS          | OV  |
| TCGA-29-1701 | MSS          | OV  |
| TCGA-29-1702 | MSS          | OV  |
| TCGA-29-1703 | MSS          | OV  |
| TCGA-29-1705 | MSS          | OV  |
| TCGA-29-1707 | MSS          | OV  |
| TCGA-29-1710 | Intermediate | OV  |
| TCGA-29-1711 | MSS          | OV  |
| TCGA-29-1761 | MSS          | OV  |
| TCGA-29-1762 | MSS          | OV  |
| TCGA-29-1763 | MSS          | OV  |
| TCGA-29-1764 | MSS          | OV  |
| TCGA-29-1766 | Intermediate | OV  |
| TCGA-29-1768 | MSS          | OV  |
| TCGA-29-1769 | MSS          | OV  |

|              |              |      |
|--------------|--------------|------|
| TCGA-29-1770 | MSS          | OV   |
| TCGA-29-1771 | MSS          | OV   |
| TCGA-29-1774 | MSS          | OV   |
| TCGA-29-1775 | MSS          | OV   |
| TCGA-29-1776 | MSS          | OV   |
| TCGA-29-1777 | MSS          | OV   |
| TCGA-29-1778 | MSS          | OV   |
| TCGA-29-1781 | Intermediate | OV   |
| TCGA-29-1783 | MSS          | OV   |
| TCGA-29-1784 | MSS          | OV   |
| TCGA-29-1785 | MSS          | OV   |
| TCGA-29-2427 | MSS          | OV   |
| TCGA-29-2429 | MSS          | OV   |
| TCGA-29-2431 | MSS          | OV   |
| TCGA-29-2432 | MSS          | OV   |
| TCGA-29-2434 | MSS          | OV   |
| TCGA-29-2436 | MSS          | OV   |
| TCGA-29-A5NZ | MSS          | OV   |
| TCGA-2A-A8VL | MSS          | PRAD |
| TCGA-2A-A8VO | MSS          | PRAD |
| TCGA-2A-A8VT | MSS          | PRAD |
| TCGA-2A-A8VV | MSS          | PRAD |
| TCGA-2A-A8VX | MSS          | PRAD |
| TCGA-2A-A8W1 | MSS          | PRAD |
| TCGA-2A-A8W3 | MSS          | PRAD |
| TCGA-2A-AAYF | MSS          | PRAD |
| TCGA-2A-AAYO | MSS          | PRAD |
| TCGA-2A-AAYU | MSS          | PRAD |
| TCGA-2E-A9G8 | MSS          | UCEC |
| TCGA-2F-A9KO | MSS          | BLCA |
| TCGA-2F-A9KP | MSS          | BLCA |
| TCGA-2F-A9KQ | MSS          | BLCA |
| TCGA-2F-A9KR | MSS          | BLCA |
| TCGA-2F-A9KT | MSS          | BLCA |
| TCGA-2F-A9KW | MSS          | BLCA |
| TCGA-2G-AAEW | MSS          | TGCT |
| TCGA-2G-AAEX | MSS          | TGCT |
| TCGA-2G-AAF1 | MSS          | TGCT |
| TCGA-2G-AAF4 | MSS          | TGCT |
| TCGA-2G-AAF6 | MSS          | TGCT |
| TCGA-2G-AAF8 | MSS          | TGCT |
| TCGA-2G-AAFE | MSS          | TGCT |
| TCGA-2G-AAFG | MSS          | TGCT |
| TCGA-2G-AAFG | MSS          | TGCT |
| TCGA-2G-AAFH | MSS          | TGCT |
| TCGA-2G-AAFI | MSS          | TGCT |
| TCGA-2G-AAFJ | MSS          | TGCT |
| TCGA-2G-AAFL | MSS          | TGCT |
| TCGA-2G-AAFM | MSS          | TGCT |
| TCGA-2G-AAFN | MSS          | TGCT |
| TCGA-2G-AAFO | MSS          | TGCT |
| TCGA-2G-AAFV | MSS          | TGCT |

|              |     |      |
|--------------|-----|------|
| TCGA-2G-AAFY | MSS | TGCT |
| TCGA-2G-AAFZ | MSS | TGCT |
| TCGA-2G-AAG0 | MSS | TGCT |
| TCGA-2G-AAG3 | MSS | TGCT |
| TCGA-2G-AAG5 | MSS | TGCT |
| TCGA-2G-AAG6 | MSS | TGCT |
| TCGA-2G-AAG7 | MSS | TGCT |
| TCGA-2G-AAG8 | MSS | TGCT |
| TCGA-2G-AAG9 | MSS | TGCT |
| TCGA-2G-AAGA | MSS | TGCT |
| TCGA-2G-AAGC | MSS | TGCT |
| TCGA-2G-AAGE | MSS | TGCT |
| TCGA-2G-AAGF | MSS | TGCT |
| TCGA-2G-AAGG | MSS | TGCT |
| TCGA-2G-AAGI | MSS | TGCT |
| TCGA-2G-AAGI | MSS | TGCT |
| TCGA-2G-AAGJ | MSS | TGCT |
| TCGA-2G-AAGK | MSS | TGCT |
| TCGA-2G-AAGM | MSS | TGCT |
| TCGA-2G-AAGN | MSS | TGCT |
| TCGA-2G-AAGO | MSS | TGCT |
| TCGA-2G-AAGP | MSS | TGCT |
| TCGA-2G-AAGS | MSS | TGCT |
| TCGA-2G-AAGT | MSS | TGCT |
| TCGA-2G-AAGV | MSS | TGCT |
| TCGA-2G-AAGW | MSS | TGCT |
| TCGA-2G-AAGX | MSS | TGCT |
| TCGA-2G-AAGY | MSS | TGCT |
| TCGA-2G-AAGY | MSS | TGCT |
| TCGA-2G-AAGZ | MSS | TGCT |
| TCGA-2G-AAH0 | MSS | TGCT |
| TCGA-2G-AAH2 | MSS | TGCT |
| TCGA-2G-AAH3 | MSS | TGCT |
| TCGA-2G-AAH4 | MSS | TGCT |
| TCGA-2G-AAH8 | MSS | TGCT |
| TCGA-2G-AAHA | MSS | TGCT |
| TCGA-2G-AAHC | MSS | TGCT |
| TCGA-2G-AAHG | MSS | TGCT |
| TCGA-2G-AAHL | MSS | TGCT |
| TCGA-2G-AAHN | MSS | TGCT |
| TCGA-2G-AAHP | MSS | TGCT |
| TCGA-2G-AAHP | MSS | TGCT |
| TCGA-2G-AAHT | MSS | TGCT |
| TCGA-2G-AAKD | MSS | TGCT |
| TCGA-2G-AAKG | MSS | TGCT |
| TCGA-2G-AAKG | MSS | TGCT |
| TCGA-2G-AAKH | MSS | TGCT |
| TCGA-2G-AAKL | MSS | TGCT |
| TCGA-2G-AAKM | MSS | TGCT |
| TCGA-2G-AAKO | MSS | TGCT |
| TCGA-2G-AAKO | MSS | TGCT |
| TCGA-2G-AAL5 | MSS | TGCT |

|              |     |      |
|--------------|-----|------|
| TCGA-2G-AAL7 | MSS | TGCT |
| TCGA-2G-AALF | MSS | TGCT |
| TCGA-2G-AALG | MSS | TGCT |
| TCGA-2G-AALN | MSS | TGCT |
| TCGA-2G-AALO | MSS | TGCT |
| TCGA-2G-AALP | MSS | TGCT |
| TCGA-2G-AALQ | MSS | TGCT |
| TCGA-2G-AALR | MSS | TGCT |
| TCGA-2G-AALS | MSS | TGCT |
| TCGA-2G-AALT | MSS | TGCT |
| TCGA-2G-AALW | MSS | TGCT |
| TCGA-2G-AALX | MSS | TGCT |
| TCGA-2G-AALY | MSS | TGCT |
| TCGA-2G-AALZ | MSS | TGCT |
| TCGA-2G-AAM2 | MSS | TGCT |
| TCGA-2G-AAM3 | MSS | TGCT |
| TCGA-2G-AAM4 | MSS | TGCT |
| TCGA-2H-A9GF | MSS | ESCA |
| TCGA-2H-A9GH | MSS | ESCA |
| TCGA-2H-A9GI | MSS | ESCA |
| TCGA-2H-A9GJ | MSS | ESCA |
| TCGA-2H-A9GK | MSS | ESCA |
| TCGA-2H-A9GL | MSS | ESCA |
| TCGA-2H-A9GM | MSS | ESCA |
| TCGA-2H-A9GN | MSS | ESCA |
| TCGA-2H-A9GO | MSS | ESCA |
| TCGA-2H-A9GQ | MSS | ESCA |
| TCGA-2H-A9GR | MSS | ESCA |
| TCGA-2J-AAB1 | MSS | PAAD |
| TCGA-2J-AAB4 | MSS | PAAD |
| TCGA-2J-AAB6 | MSS | PAAD |
| TCGA-2J-AAB8 | MSS | PAAD |
| TCGA-2J-AAB9 | MSS | PAAD |
| TCGA-2J-AABA | MSS | PAAD |
| TCGA-2J-AABE | MSS | PAAD |
| TCGA-2J-AABF | MSS | PAAD |
| TCGA-2J-AABH | MSS | PAAD |
| TCGA-2J-AABI | MSS | PAAD |
| TCGA-2J-AABK | MSS | PAAD |
| TCGA-2J-AABO | MSS | PAAD |
| TCGA-2J-AABP | MSS | PAAD |
| TCGA-2J-AABR | MSS | PAAD |
| TCGA-2J-AABT | MSS | PAAD |
| TCGA-2J-AABV | MSS | PAAD |
| TCGA-2K-A9WE | MSS | KIRP |
| TCGA-2L-AAQA | MSS | PAAD |
| TCGA-2L-AAQE | MSS | PAAD |
| TCGA-2L-AAQI | MSS | PAAD |
| TCGA-2L-AAQJ | MSS | PAAD |
| TCGA-2L-AAQL | MSS | PAAD |
| TCGA-2L-AAQM | MSS | PAAD |
| TCGA-2V-A95S | MSS | LIHC |

|              |              |      |
|--------------|--------------|------|
| TCGA-2W-A8YY | MSI-H        | CESC |
| TCGA-2X-A9D5 | MSS          | TGCT |
| TCGA-2X-A9D6 | MSS          | TGCT |
| TCGA-2Y-A9G5 | MSS          | LIHC |
| TCGA-2Y-A9GT | MSS          | LIHC |
| TCGA-2Y-A9GU | MSS          | LIHC |
| TCGA-2Y-A9GV | MSS          | LIHC |
| TCGA-2Y-A9GW | MSS          | LIHC |
| TCGA-2Y-A9GX | MSS          | LIHC |
| TCGA-2Y-A9GY | MSS          | LIHC |
| TCGA-2Y-A9GZ | MSS          | LIHC |
| TCGA-2Y-A9H0 | MSS          | LIHC |
| TCGA-2Y-A9H1 | MSS          | LIHC |
| TCGA-2Y-A9H2 | MSS          | LIHC |
| TCGA-2Y-A9H3 | MSS          | LIHC |
| TCGA-2Y-A9H4 | MSS          | LIHC |
| TCGA-2Y-A9H5 | MSS          | LIHC |
| TCGA-2Y-A9H6 | MSS          | LIHC |
| TCGA-2Y-A9H7 | MSS          | LIHC |
| TCGA-2Y-A9H8 | MSS          | LIHC |
| TCGA-2Y-A9H9 | MSS          | LIHC |
| TCGA-2Y-A9HA | MSS          | LIHC |
| TCGA-2Y-A9HB | MSS          | LIHC |
| TCGA-2Z-A9J1 | MSS          | KIRP |
| TCGA-2Z-A9J2 | MSS          | KIRP |
| TCGA-2Z-A9J3 | MSS          | KIRP |
| TCGA-2Z-A9J5 | MSS          | KIRP |
| TCGA-2Z-A9J6 | MSS          | KIRP |
| TCGA-2Z-A9J7 | MSS          | KIRP |
| TCGA-2Z-A9J8 | MSS          | KIRP |
| TCGA-2Z-A9J9 | MSS          | KIRP |
| TCGA-2Z-A9JD | MSS          | KIRP |
| TCGA-2Z-A9JE | MSS          | KIRP |
| TCGA-2Z-A9JG | MSS          | KIRP |
| TCGA-2Z-A9JI | MSS          | KIRP |
| TCGA-2Z-A9JJ | MSS          | KIRP |
| TCGA-2Z-A9JK | MSS          | KIRP |
| TCGA-2Z-A9JL | MSS          | KIRP |
| TCGA-2Z-A9JM | MSS          | KIRP |
| TCGA-2Z-A9JN | MSS          | KIRP |
| TCGA-2Z-A9JO | MSS          | KIRP |
| TCGA-2Z-A9JP | MSS          | KIRP |
| TCGA-2Z-A9JQ | MSS          | KIRP |
| TCGA-2Z-A9JR | MSS          | KIRP |
| TCGA-2Z-A9JS | MSS          | KIRP |
| TCGA-2Z-A9JT | MSS          | KIRP |
| TCGA-30-1714 | MSS          | OV   |
| TCGA-30-1718 | MSS          | OV   |
| TCGA-30-1853 | Intermediate | OV   |
| TCGA-30-1855 | Intermediate | OV   |
| TCGA-30-1856 | MSS          | OV   |
| TCGA-30-1857 | MSS          | OV   |

|              |       |      |
|--------------|-------|------|
| TCGA-30-1862 | MSI-H | OV   |
| TCGA-30-1891 | MSS   | OV   |
| TCGA-31-1950 | MSI-H | OV   |
| TCGA-31-1953 | MSI-H | OV   |
| TCGA-31-1959 | MSI-H | OV   |
| TCGA-32-1970 | MSS   | GBM  |
| TCGA-32-1976 | MSS   | GBM  |
| TCGA-32-1977 | MSS   | GBM  |
| TCGA-32-1979 | MSS   | GBM  |
| TCGA-32-1980 | MSS   | GBM  |
| TCGA-32-1982 | MSS   | GBM  |
| TCGA-32-1986 | MSS   | GBM  |
| TCGA-32-1991 | MSS   | GBM  |
| TCGA-32-2491 | MSS   | GBM  |
| TCGA-32-2494 | MSS   | GBM  |
| TCGA-32-2495 | MSS   | GBM  |
| TCGA-32-2615 | MSS   | GBM  |
| TCGA-32-2616 | MSS   | GBM  |
| TCGA-32-2634 | MSS   | GBM  |
| TCGA-32-4208 | MSS   | GBM  |
| TCGA-32-4209 | MSS   | GBM  |
| TCGA-32-4210 | MSS   | GBM  |
| TCGA-32-4211 | MSS   | GBM  |
| TCGA-32-4213 | MSS   | GBM  |
| TCGA-32-4719 | MSS   | GBM  |
| TCGA-32-5222 | MSS   | GBM  |
| TCGA-33-4532 | MSS   | LUSC |
| TCGA-33-4533 | MSS   | LUSC |
| TCGA-33-4538 | MSS   | LUSC |
| TCGA-33-4547 | MSS   | LUSC |
| TCGA-33-4566 | MSS   | LUSC |
| TCGA-33-4582 | MSS   | LUSC |
| TCGA-33-4583 | MSS   | LUSC |
| TCGA-33-4586 | MSS   | LUSC |
| TCGA-33-4587 | MSS   | LUSC |
| TCGA-33-4589 | MSS   | LUSC |
| TCGA-33-6737 | MSS   | LUSC |
| TCGA-33-6738 | MSS   | LUSC |
| TCGA-33-A4WN | MSS   | LUSC |
| TCGA-33-A5GW | MSS   | LUSC |
| TCGA-33-AAS8 | MSS   | LUSC |
| TCGA-33-AASB | MSS   | LUSC |
| TCGA-33-AASD | MSS   | LUSC |
| TCGA-33-AASI | MSS   | LUSC |
| TCGA-33-AASJ | MSS   | LUSC |
| TCGA-33-AASL | MSS   | LUSC |
| TCGA-34-2596 | MSI-H | LUSC |
| TCGA-34-2600 | MSS   | LUSC |
| TCGA-34-2604 | MSS   | LUSC |
| TCGA-34-2605 | MSS   | LUSC |
| TCGA-34-2608 | MSS   | LUSC |
| TCGA-34-5231 | MSS   | LUSC |

|              |     |      |
|--------------|-----|------|
| TCGA-34-5232 | MSS | LUSC |
| TCGA-34-5234 | MSS | LUSC |
| TCGA-34-5236 | MSS | LUSC |
| TCGA-34-5239 | MSS | LUSC |
| TCGA-34-5240 | MSS | LUSC |
| TCGA-34-5241 | MSS | LUSC |
| TCGA-34-5927 | MSS | LUSC |
| TCGA-34-5928 | MSS | LUSC |
| TCGA-34-5929 | MSS | LUSC |
| TCGA-34-7107 | MSS | LUSC |
| TCGA-34-8454 | MSS | LUSC |
| TCGA-34-8455 | MSS | LUSC |
| TCGA-34-8456 | MSS | LUSC |
| TCGA-34-A5IX | MSS | LUSC |
| TCGA-35-3615 | MSS | LUAD |
| TCGA-35-4122 | MSS | LUAD |
| TCGA-35-4123 | MSS | LUAD |
| TCGA-35-5375 | MSS | LUAD |
| TCGA-36-2530 | MSS | OV   |
| TCGA-36-2532 | MSS | OV   |
| TCGA-36-2533 | MSS | OV   |
| TCGA-36-2534 | MSS | OV   |
| TCGA-36-2537 | MSS | OV   |
| TCGA-36-2538 | MSS | OV   |
| TCGA-36-2539 | MSS | OV   |
| TCGA-36-2540 | MSS | OV   |
| TCGA-36-2542 | MSS | OV   |
| TCGA-36-2543 | MSS | OV   |
| TCGA-36-2544 | MSS | OV   |
| TCGA-36-2545 | MSS | OV   |
| TCGA-36-2547 | MSS | OV   |
| TCGA-36-2548 | MSS | OV   |
| TCGA-36-2551 | MSS | OV   |
| TCGA-36-2552 | MSS | OV   |
| TCGA-37-3783 | MSS | LUSC |
| TCGA-37-3789 | MSS | LUSC |
| TCGA-37-3792 | MSS | LUSC |
| TCGA-37-4129 | MSS | LUSC |
| TCGA-37-4130 | MSS | LUSC |
| TCGA-37-4132 | MSS | LUSC |
| TCGA-37-4133 | MSS | LUSC |
| TCGA-37-4135 | MSS | LUSC |
| TCGA-37-4141 | MSS | LUSC |
| TCGA-37-5819 | MSS | LUSC |
| TCGA-37-A5EL | MSS | LUSC |
| TCGA-37-A5EM | MSS | LUSC |
| TCGA-37-A5EN | MSS | LUSC |
| TCGA-38-4625 | MSS | LUAD |
| TCGA-38-4626 | MSS | LUAD |
| TCGA-38-4627 | MSS | LUAD |
| TCGA-38-4628 | MSS | LUAD |
| TCGA-38-4629 | MSS | LUAD |

|              |              |      |
|--------------|--------------|------|
| TCGA-38-4630 | MSS          | LUAD |
| TCGA-38-4631 | MSS          | LUAD |
| TCGA-38-4632 | MSS          | LUAD |
| TCGA-38-6178 | MSS          | LUAD |
| TCGA-38-A44F | MSS          | LUAD |
| TCGA-39-5011 | MSS          | LUSC |
| TCGA-39-5016 | MSS          | LUSC |
| TCGA-39-5019 | MSS          | LUSC |
| TCGA-39-5021 | MSS          | LUSC |
| TCGA-39-5022 | MSS          | LUSC |
| TCGA-39-5024 | MSS          | LUSC |
| TCGA-39-5027 | MSS          | LUSC |
| TCGA-39-5028 | MSS          | LUSC |
| TCGA-39-5029 | MSS          | LUSC |
| TCGA-39-5030 | MSS          | LUSC |
| TCGA-39-5031 | MSS          | LUSC |
| TCGA-39-5034 | MSS          | LUSC |
| TCGA-39-5035 | MSS          | LUSC |
| TCGA-39-5036 | MSS          | LUSC |
| TCGA-39-5037 | MSS          | LUSC |
| TCGA-39-5039 | MSS          | LUSC |
| TCGA-39-5040 | MSS          | LUSC |
| TCGA-3A-A9I5 | MSS          | PAAD |
| TCGA-3A-A9I7 | MSS          | PAAD |
| TCGA-3A-A9I9 | MSS          | PAAD |
| TCGA-3A-A9IB | MSS          | PAAD |
| TCGA-3A-A9IC | MSS          | PAAD |
| TCGA-3A-A9IH | MSS          | PAAD |
| TCGA-3A-A9IJ | MSS          | PAAD |
| TCGA-3A-A9IL | MSS          | PAAD |
| TCGA-3A-A9IN | MSS          | PAAD |
| TCGA-3A-A9IO | MSS          | PAAD |
| TCGA-3A-A9IR | MSS          | PAAD |
| TCGA-3A-A9IS | MSS          | PAAD |
| TCGA-3A-A9IU | MSS          | PAAD |
| TCGA-3A-A9IV | MSS          | PAAD |
| TCGA-3A-A9IX | MSS          | PAAD |
| TCGA-3A-A9IZ | MSS          | PAAD |
| TCGA-3A-A9J0 | MSS          | PAAD |
| TCGA-3B-A9HI | MSS          | SARC |
| TCGA-3B-A9HJ | MSS          | SARC |
| TCGA-3B-A9HO | MSS          | SARC |
| TCGA-3B-A9HP | MSS          | SARC |
| TCGA-3B-A9HQ | MSS          | SARC |
| TCGA-3B-A9HR | MSS          | SARC |
| TCGA-3B-A9HS | MSS          | SARC |
| TCGA-3B-A9HT | Intermediate | SARC |
| TCGA-3B-A9HU | MSS          | SARC |
| TCGA-3B-A9HV | MSS          | SARC |
| TCGA-3B-A9HX | MSS          | SARC |
| TCGA-3B-A9HY | MSS          | SARC |
| TCGA-3B-A9HZ | MSS          | SARC |



|              |     |      |
|--------------|-----|------|
| TCGA-3B-A9I0 | MSS | SARC |
| TCGA-3B-A9I1 | MSS | SARC |
| TCGA-3B-A9I3 | MSS | SARC |
| TCGA-3C-AAAU | MSS | BRCA |
| TCGA-3C-AALI | MSS | BRCA |
| TCGA-3C-AALJ | MSS | BRCA |
| TCGA-3C-AALK | MSS | BRCA |
| TCGA-3E-AAAY | MSS | PAAD |
| TCGA-3E-AAAZ | MSS | PAAD |
| TCGA-3G-AB00 | MSS | THYM |
| TCGA-3G-AB0Q | MSS | THYM |
| TCGA-3G-AB0T | MSS | THYM |
| TCGA-3G-AB14 | MSS | THYM |
| TCGA-3G-AB19 | MSS | THYM |
| TCGA-3H-AB3M | MSS | MESO |
| TCGA-3H-AB3S | MSS | MESO |
| TCGA-3H-AB3T | MSS | MESO |
| TCGA-3K-AAZ8 | MSS | LIHC |
| TCGA-3L-AA1B | MSS | COAD |
| TCGA-3M-AB46 | MSS | STAD |
| TCGA-3M-AB47 | MSS | STAD |
| TCGA-3N-A9WB | MSS | SKCM |
| TCGA-3N-A9WC | MSS | SKCM |
| TCGA-3N-A9WD | MSS | SKCM |
| TCGA-3P-A9WA | MSS | OV   |
| TCGA-3Q-A9WF | MSS | THYM |
| TCGA-3R-A8YX | MSS | SARC |
| TCGA-3S-A8YW | MSS | THYM |
| TCGA-3S-AAYX | MSS | THYM |
| TCGA-3T-AA9L | MSS | THYM |
| TCGA-3U-A98D | MSS | MESO |
| TCGA-3U-A98G | MSS | MESO |
| TCGA-3U-A98I | MSS | MESO |
| TCGA-3X-AAV9 | MSS | CHOL |
| TCGA-3X-AAVA | MSS | CHOL |
| TCGA-3X-AAVB | MSS | CHOL |
| TCGA-3X-AAVC | MSS | CHOL |
| TCGA-3X-AAVE | MSS | CHOL |
| TCGA-3Z-A93Z | MSS | KIRC |
| TCGA-41-2571 | MSS | GBM  |
| TCGA-41-2572 | MSS | GBM  |
| TCGA-41-2573 | MSS | GBM  |
| TCGA-41-3392 | MSS | GBM  |
| TCGA-41-3393 | MSS | GBM  |
| TCGA-41-3915 | MSS | GBM  |
| TCGA-41-4097 | MSS | GBM  |
| TCGA-41-5651 | MSS | GBM  |
| TCGA-41-6646 | MSS | GBM  |
| TCGA-42-2582 | MSS | OV   |
| TCGA-42-2587 | MSS | OV   |
| TCGA-42-2588 | MSS | OV   |
| TCGA-42-2590 | MSS | OV   |

|              |              |      |
|--------------|--------------|------|
| TCGA-42-2591 | MSS          | OV   |
| TCGA-42-2593 | MSS          | OV   |
| TCGA-43-2576 | MSS          | LUSC |
| TCGA-43-2578 | MSI-H        | LUSC |
| TCGA-43-2581 | MSS          | LUSC |
| TCGA-43-3394 | MSS          | LUSC |
| TCGA-43-3920 | MSS          | LUSC |
| TCGA-43-5668 | MSS          | LUSC |
| TCGA-43-5670 | MSS          | LUSC |
| TCGA-43-6143 | MSS          | LUSC |
| TCGA-43-6647 | MSS          | LUSC |
| TCGA-43-6770 | MSS          | LUSC |
| TCGA-43-6771 | MSS          | LUSC |
| TCGA-43-6773 | MSS          | LUSC |
| TCGA-43-7656 | MSS          | LUSC |
| TCGA-43-7657 | MSS          | LUSC |
| TCGA-43-7658 | MSS          | LUSC |
| TCGA-43-8118 | MSS          | LUSC |
| TCGA-43-A474 | MSS          | LUSC |
| TCGA-43-A475 | MSS          | LUSC |
| TCGA-43-A56U | MSS          | LUSC |
| TCGA-43-A56V | MSS          | LUSC |
| TCGA-44-2655 | MSS          | LUAD |
| TCGA-44-2656 | MSS          | LUAD |
| TCGA-44-2656 | MSS          | LUAD |
| TCGA-44-2657 | MSS          | LUAD |
| TCGA-44-2659 | MSS          | LUAD |
| TCGA-44-2661 | MSS          | LUAD |
| TCGA-44-2662 | MSS          | LUAD |
| TCGA-44-2662 | Intermediate | LUAD |
| TCGA-44-2665 | Intermediate | LUAD |
| TCGA-44-2665 | MSI-H        | LUAD |
| TCGA-44-2666 | MSS          | LUAD |
| TCGA-44-2666 | MSS          | LUAD |
| TCGA-44-2668 | Intermediate | LUAD |
| TCGA-44-2668 | MSS          | LUAD |
| TCGA-44-3396 | MSS          | LUAD |
| TCGA-44-3398 | MSS          | LUAD |
| TCGA-44-3917 | MSS          | LUAD |
| TCGA-44-3917 | MSS          | LUAD |
| TCGA-44-3918 | MSS          | LUAD |
| TCGA-44-3918 | MSS          | LUAD |
| TCGA-44-3919 | MSS          | LUAD |
| TCGA-44-4112 | MSS          | LUAD |
| TCGA-44-4112 | MSI-H        | LUAD |
| TCGA-44-5643 | MSS          | LUAD |
| TCGA-44-5644 | MSS          | LUAD |
| TCGA-44-5645 | MSS          | LUAD |
| TCGA-44-5645 | MSS          | LUAD |
| TCGA-44-6144 | MSS          | LUAD |
| TCGA-44-6145 | MSS          | LUAD |
| TCGA-44-6146 | MSS          | LUAD |

|              |     |      |
|--------------|-----|------|
| TCGA-44-6146 | MSS | LUAD |
| TCGA-44-6147 | MSS | LUAD |
| TCGA-44-6147 | MSS | LUAD |
| TCGA-44-6148 | MSS | LUAD |
| TCGA-44-6774 | MSS | LUAD |
| TCGA-44-6775 | MSS | LUAD |
| TCGA-44-6775 | MSS | LUAD |
| TCGA-44-6776 | MSS | LUAD |
| TCGA-44-6777 | MSS | LUAD |
| TCGA-44-6778 | MSS | LUAD |
| TCGA-44-6779 | MSS | LUAD |
| TCGA-44-7659 | MSS | LUAD |
| TCGA-44-7660 | MSS | LUAD |
| TCGA-44-7661 | MSS | LUAD |
| TCGA-44-7662 | MSS | LUAD |
| TCGA-44-7667 | MSS | LUAD |
| TCGA-44-7669 | MSS | LUAD |
| TCGA-44-7670 | MSS | LUAD |
| TCGA-44-7671 | MSS | LUAD |
| TCGA-44-7672 | MSS | LUAD |
| TCGA-44-8117 | MSS | LUAD |
| TCGA-44-A479 | MSS | LUAD |
| TCGA-44-A47A | MSS | LUAD |
| TCGA-44-A47B | MSS | LUAD |
| TCGA-44-A47F | MSS | LUAD |
| TCGA-44-A47G | MSS | LUAD |
| TCGA-44-A4SS | MSS | LUAD |
| TCGA-44-A4SU | MSS | LUAD |
| TCGA-46-3765 | MSS | LUSC |
| TCGA-46-3766 | MSS | LUSC |
| TCGA-46-3767 | MSS | LUSC |
| TCGA-46-3768 | MSS | LUSC |
| TCGA-46-3769 | MSS | LUSC |
| TCGA-46-6025 | MSS | LUSC |
| TCGA-46-6026 | MSS | LUSC |
| TCGA-49-4486 | MSS | LUAD |
| TCGA-49-4487 | MSS | LUAD |
| TCGA-49-4488 | MSS | LUAD |
| TCGA-49-4490 | MSS | LUAD |
| TCGA-49-4494 | MSS | LUAD |
| TCGA-49-4501 | MSS | LUAD |
| TCGA-49-4505 | MSS | LUAD |
| TCGA-49-4506 | MSS | LUAD |
| TCGA-49-4507 | MSS | LUAD |
| TCGA-49-4510 | MSS | LUAD |
| TCGA-49-4512 | MSS | LUAD |
| TCGA-49-4514 | MSS | LUAD |
| TCGA-49-6742 | MSS | LUAD |
| TCGA-49-6743 | MSS | LUAD |
| TCGA-49-6744 | MSS | LUAD |
| TCGA-49-6745 | MSS | LUAD |
| TCGA-49-6761 | MSS | LUAD |

|              |       |      |
|--------------|-------|------|
| TCGA-49-6767 | MSS   | LUAD |
| TCGA-49-AAQV | MSS   | LUAD |
| TCGA-49-AAR0 | MSS   | LUAD |
| TCGA-49-AAR2 | MSS   | LUAD |
| TCGA-49-AAR3 | MSS   | LUAD |
| TCGA-49-AAR4 | MSS   | LUAD |
| TCGA-49-AAR9 | MSS   | LUAD |
| TCGA-49-AARE | MSS   | LUAD |
| TCGA-49-AARN | MSS   | LUAD |
| TCGA-49-AARO | MSS   | LUAD |
| TCGA-49-AARQ | MSS   | LUAD |
| TCGA-49-AARR | MSS   | LUAD |
| TCGA-4A-A93W | MSS   | KIRP |
| TCGA-4A-A93X | MSS   | KIRP |
| TCGA-4A-A93Y | MSS   | KIRP |
| TCGA-4B-A93V | MSS   | LUAD |
| TCGA-4C-A93U | MSS   | THCA |
| TCGA-4E-A92E | MSS   | UCEC |
| TCGA-4G-AAZF | MSS   | CHOL |
| TCGA-4G-AAZG | MSS   | CHOL |
| TCGA-4G-AAZO | MSS   | CHOL |
| TCGA-4G-AAZR | MSS   | CHOL |
| TCGA-4G-AAZT | MSS   | CHOL |
| TCGA-4H-AAAK | MSS   | BRCA |
| TCGA-4J-AA1J | MSS   | CESC |
| TCGA-4K-AA1G | MSS   | TGCT |
| TCGA-4K-AA1H | MSS   | TGCT |
| TCGA-4K-AA1I | MSS   | TGCT |
| TCGA-4K-AAAL | MSS   | TGCT |
| TCGA-4L-AA1F | MSS   | PRAD |
| TCGA-4N-A93T | MSS   | COAD |
| TCGA-4P-AA8J | MSS   | HNSC |
| TCGA-4R-AA8I | MSI-H | LIHC |
| TCGA-4T-AA8H | MSS   | COAD |
| TCGA-4V-A9QJ | MSS   | THYM |
| TCGA-4V-A9QJ | MSS   | THYM |
| TCGA-4V-A9QL | MSS   | THYM |
| TCGA-4V-A9QM | MSS   | THYM |
| TCGA-4V-A9QN | MSS   | THYM |
| TCGA-4V-A9QQ | MSS   | THYM |
| TCGA-4V-A9QR | MSS   | THYM |
| TCGA-4V-A9QS | MSS   | THYM |
| TCGA-4V-A9QT | MSS   | THYM |
| TCGA-4V-A9QU | MSS   | THYM |
| TCGA-4V-A9QW | MSS   | THYM |
| TCGA-4V-A9QX | MSS   | THYM |
| TCGA-4W-AA9R | MSS   | GBM  |
| TCGA-4W-AA9S | MSS   | GBM  |
| TCGA-4W-AA9T | MSS   | GBM  |
| TCGA-4X-A9F9 | MSS   | THYM |
| TCGA-4X-A9FA | MSS   | THYM |
| TCGA-4X-A9FB | MSS   | THYM |

|              |       |      |
|--------------|-------|------|
| TCGA-4X-A9FC | MSS   | THYM |
| TCGA-4X-A9FD | MSS   | THYM |
| TCGA-4Z-AA7M | MSS   | BLCA |
| TCGA-4Z-AA7N | MSS   | BLCA |
| TCGA-4Z-AA7O | MSS   | BLCA |
| TCGA-4Z-AA7Q | MSS   | BLCA |
| TCGA-4Z-AA7R | MSS   | BLCA |
| TCGA-4Z-AA7S | MSS   | BLCA |
| TCGA-4Z-AA7W | MSS   | BLCA |
| TCGA-4Z-AA7Y | MSS   | BLCA |
| TCGA-4Z-AA80 | MSS   | BLCA |
| TCGA-4Z-AA81 | MSS   | BLCA |
| TCGA-4Z-AA82 | MSS   | BLCA |
| TCGA-4Z-AA83 | MSS   | BLCA |
| TCGA-4Z-AA84 | MSS   | BLCA |
| TCGA-4Z-AA86 | MSS   | BLCA |
| TCGA-4Z-AA87 | MSS   | BLCA |
| TCGA-4Z-AA89 | MSS   | BLCA |
| TCGA-50-5044 | MSS   | LUAD |
| TCGA-50-5045 | MSS   | LUAD |
| TCGA-50-5049 | MSS   | LUAD |
| TCGA-50-5051 | MSS   | LUAD |
| TCGA-50-5055 | MSS   | LUAD |
| TCGA-50-5066 | MSS   | LUAD |
| TCGA-50-5068 | MSS   | LUAD |
| TCGA-50-5072 | MSS   | LUAD |
| TCGA-50-5930 | MSS   | LUAD |
| TCGA-50-5931 | MSS   | LUAD |
| TCGA-50-5932 | MSS   | LUAD |
| TCGA-50-5933 | MSS   | LUAD |
| TCGA-50-5935 | MSS   | LUAD |
| TCGA-50-5936 | MSS   | LUAD |
| TCGA-50-5939 | MSS   | LUAD |
| TCGA-50-5941 | MSS   | LUAD |
| TCGA-50-5942 | MSS   | LUAD |
| TCGA-50-5944 | MSS   | LUAD |
| TCGA-50-5946 | MSS   | LUAD |
| TCGA-50-5946 | MSI-H | LUAD |
| TCGA-50-6590 | MSS   | LUAD |
| TCGA-50-6591 | MSS   | LUAD |
| TCGA-50-6592 | MSS   | LUAD |
| TCGA-50-6593 | MSS   | LUAD |
| TCGA-50-6594 | MSS   | LUAD |
| TCGA-50-6595 | MSS   | LUAD |
| TCGA-50-6597 | MSS   | LUAD |
| TCGA-50-6673 | MSS   | LUAD |
| TCGA-50-7109 | MSS   | LUAD |
| TCGA-50-8457 | MSS   | LUAD |
| TCGA-50-8459 | MSS   | LUAD |
| TCGA-50-8460 | MSS   | LUAD |
| TCGA-51-4079 | MSS   | LUSC |
| TCGA-51-4080 | MSS   | LUSC |

|              |     |      |
|--------------|-----|------|
| TCGA-51-4081 | MSS | LUSC |
| TCGA-51-6867 | MSS | LUSC |
| TCGA-52-7622 | MSS | LUSC |
| TCGA-52-7809 | MSS | LUSC |
| TCGA-52-7810 | MSS | LUSC |
| TCGA-52-7811 | MSS | LUSC |
| TCGA-52-7812 | MSS | LUSC |
| TCGA-53-7624 | MSS | LUAD |
| TCGA-53-7626 | MSS | LUAD |
| TCGA-53-A4EZ | MSS | LUAD |
| TCGA-55-1592 | MSS | LUAD |
| TCGA-55-1594 | MSS | LUAD |
| TCGA-55-1595 | MSS | LUAD |
| TCGA-55-1596 | MSS | LUAD |
| TCGA-55-5899 | MSS | LUAD |
| TCGA-55-6543 | MSS | LUAD |
| TCGA-55-6642 | MSS | LUAD |
| TCGA-55-6712 | MSS | LUAD |
| TCGA-55-6968 | MSS | LUAD |
| TCGA-55-6969 | MSS | LUAD |
| TCGA-55-6970 | MSS | LUAD |
| TCGA-55-6971 | MSS | LUAD |
| TCGA-55-6972 | MSS | LUAD |
| TCGA-55-6975 | MSS | LUAD |
| TCGA-55-6978 | MSS | LUAD |
| TCGA-55-6979 | MSS | LUAD |
| TCGA-55-6980 | MSS | LUAD |
| TCGA-55-6981 | MSS | LUAD |
| TCGA-55-6982 | MSS | LUAD |
| TCGA-55-6983 | MSS | LUAD |
| TCGA-55-6984 | MSS | LUAD |
| TCGA-55-6985 | MSS | LUAD |
| TCGA-55-6986 | MSS | LUAD |
| TCGA-55-6987 | MSS | LUAD |
| TCGA-55-7227 | MSS | LUAD |
| TCGA-55-7281 | MSS | LUAD |
| TCGA-55-7283 | MSS | LUAD |
| TCGA-55-7284 | MSS | LUAD |
| TCGA-55-7570 | MSS | LUAD |
| TCGA-55-7573 | MSS | LUAD |
| TCGA-55-7574 | MSS | LUAD |
| TCGA-55-7576 | MSS | LUAD |
| TCGA-55-7724 | MSS | LUAD |
| TCGA-55-7728 | MSS | LUAD |
| TCGA-55-7815 | MSS | LUAD |
| TCGA-55-7994 | MSS | LUAD |
| TCGA-55-7995 | MSS | LUAD |
| TCGA-55-8089 | MSS | LUAD |
| TCGA-55-8091 | MSS | LUAD |
| TCGA-55-8092 | MSS | LUAD |
| TCGA-55-8096 | MSS | LUAD |
| TCGA-55-8097 | MSS | LUAD |

|              |       |      |
|--------------|-------|------|
| TCGA-55-8204 | MSS   | LUAD |
| TCGA-55-8205 | MSS   | LUAD |
| TCGA-55-8206 | MSS   | LUAD |
| TCGA-55-8207 | MSS   | LUAD |
| TCGA-55-8299 | MSS   | LUAD |
| TCGA-55-8301 | MSS   | LUAD |
| TCGA-55-8302 | MSS   | LUAD |
| TCGA-55-8505 | MSS   | LUAD |
| TCGA-55-8506 | MSI-H | LUAD |
| TCGA-55-8507 | MSS   | LUAD |
| TCGA-55-8508 | MSS   | LUAD |
| TCGA-55-8510 | MSS   | LUAD |
| TCGA-55-8511 | MSS   | LUAD |
| TCGA-55-8512 | MSS   | LUAD |
| TCGA-55-8513 | MSS   | LUAD |
| TCGA-55-8514 | MSS   | LUAD |
| TCGA-55-8614 | MSS   | LUAD |
| TCGA-55-8615 | MSS   | LUAD |
| TCGA-55-8616 | MSS   | LUAD |
| TCGA-55-8619 | MSS   | LUAD |
| TCGA-55-8620 | MSS   | LUAD |
| TCGA-55-8621 | MSS   | LUAD |
| TCGA-55-A48X | MSS   | LUAD |
| TCGA-55-A48Y | MSS   | LUAD |
| TCGA-55-A48Z | MSS   | LUAD |
| TCGA-55-A490 | MSS   | LUAD |
| TCGA-55-A491 | MSS   | LUAD |
| TCGA-55-A492 | MSS   | LUAD |
| TCGA-55-A493 | MSS   | LUAD |
| TCGA-55-A494 | MSS   | LUAD |
| TCGA-55-A4DF | MSS   | LUAD |
| TCGA-55-A4DG | MSS   | LUAD |
| TCGA-55-A57B | MSS   | LUAD |
| TCGA-56-1622 | MSS   | LUSC |
| TCGA-56-5897 | MSS   | LUSC |
| TCGA-56-5898 | MSS   | LUSC |
| TCGA-56-6545 | MSS   | LUSC |
| TCGA-56-6546 | MSS   | LUSC |
| TCGA-56-7221 | MSS   | LUSC |
| TCGA-56-7222 | MSS   | LUSC |
| TCGA-56-7223 | MSS   | LUSC |
| TCGA-56-7579 | MSS   | LUSC |
| TCGA-56-7580 | MSS   | LUSC |
| TCGA-56-7582 | MSS   | LUSC |
| TCGA-56-7730 | MSS   | LUSC |
| TCGA-56-7731 | MSS   | LUSC |
| TCGA-56-7822 | MSS   | LUSC |
| TCGA-56-8304 | MSS   | LUSC |
| TCGA-56-8305 | MSS   | LUSC |
| TCGA-56-8307 | MSS   | LUSC |
| TCGA-56-8308 | MSS   | LUSC |
| TCGA-56-8309 | MSS   | LUSC |

|              |              |      |
|--------------|--------------|------|
| TCGA-56-8503 | MSS          | LUSC |
| TCGA-56-8504 | MSS          | LUSC |
| TCGA-56-8622 | MSS          | LUSC |
| TCGA-56-8623 | MSS          | LUSC |
| TCGA-56-8624 | MSS          | LUSC |
| TCGA-56-8625 | MSS          | LUSC |
| TCGA-56-8626 | MSS          | LUSC |
| TCGA-56-8628 | MSS          | LUSC |
| TCGA-56-8629 | MSS          | LUSC |
| TCGA-56-A49D | MSS          | LUSC |
| TCGA-56-A4BW | MSS          | LUSC |
| TCGA-56-A4BX | MSS          | LUSC |
| TCGA-56-A4BY | MSS          | LUSC |
| TCGA-56-A4ZJ | MSS          | LUSC |
| TCGA-56-A4ZK | MSS          | LUSC |
| TCGA-56-A5DR | MSS          | LUSC |
| TCGA-56-A5DS | MSS          | LUSC |
| TCGA-56-A62T | MSS          | LUSC |
| TCGA-57-1586 | MSS          | OV   |
| TCGA-57-1992 | Intermediate | OV   |
| TCGA-57-1993 | MSS          | OV   |
| TCGA-58-8386 | MSS          | LUSC |
| TCGA-58-8387 | MSS          | LUSC |
| TCGA-58-8388 | MSS          | LUSC |
| TCGA-58-8390 | MSS          | LUSC |
| TCGA-58-8391 | MSS          | LUSC |
| TCGA-58-8392 | MSS          | LUSC |
| TCGA-58-8393 | MSS          | LUSC |
| TCGA-58-A46J | MSS          | LUSC |
| TCGA-58-A46K | MSS          | LUSC |
| TCGA-58-A46L | MSS          | LUSC |
| TCGA-58-A46M | MSS          | LUSC |
| TCGA-58-A46N | MSS          | LUSC |
| TCGA-59-2348 | MSS          | OV   |
| TCGA-59-2349 | MSI-H        | OV   |
| TCGA-59-2350 | MSS          | OV   |
| TCGA-59-2351 | MSS          | OV   |
| TCGA-59-2352 | MSS          | OV   |
| TCGA-59-2354 | MSS          | OV   |
| TCGA-59-2355 | MSS          | OV   |
| TCGA-59-2363 | MSS          | OV   |
| TCGA-59-2372 | MSS          | OV   |
| TCGA-59-A5PD | MSS          | OV   |
| TCGA-5A-A8ZF | MSS          | CHOL |
| TCGA-5A-A8ZG | MSS          | CHOL |
| TCGA-5B-A90C | MSS          | UCEC |
| TCGA-5C-A9VG | MSS          | LIHC |
| TCGA-5C-A9VH | MSS          | LIHC |
| TCGA-5C-AAPD | MSS          | LIHC |
| TCGA-5G-A9ZZ | MSS          | THYM |
| TCGA-5K-AAAP | MSS          | THYM |
| TCGA-5L-AATO | MSS          | BRCA |



|              |       |      |
|--------------|-------|------|
| TCGA-5L-AAT1 | MSS   | BRCA |
| TCGA-5M-AAT4 | MSS   | COAD |
| TCGA-5M-AAT5 | MSS   | COAD |
| TCGA-5M-AAT6 | MSI-H | COAD |
| TCGA-5M-AATA | MSS   | COAD |
| TCGA-5M-AATE | MSS   | COAD |
| TCGA-5N-A9KI | MSS   | BLCA |
| TCGA-5N-A9KM | MSS   | BLCA |
| TCGA-5P-A9JU | MSS   | KIRP |
| TCGA-5P-A9JV | MSS   | KIRP |
| TCGA-5P-A9JW | MSS   | KIRP |
| TCGA-5P-A9JY | MSS   | KIRP |
| TCGA-5P-A9JZ | MSS   | KIRP |
| TCGA-5P-A9K0 | MSS   | KIRP |
| TCGA-5P-A9K2 | MSS   | KIRP |
| TCGA-5P-A9K3 | MSS   | KIRP |
| TCGA-5P-A9K4 | MSS   | KIRP |
| TCGA-5P-A9K6 | MSS   | KIRP |
| TCGA-5P-A9K8 | MSS   | KIRP |
| TCGA-5P-A9K9 | MSS   | KIRP |
| TCGA-5P-A9KA | MSS   | KIRP |
| TCGA-5P-A9KC | MSS   | KIRP |
| TCGA-5P-A9KE | MSS   | KIRP |
| TCGA-5P-A9KH | MSS   | KIRP |
| TCGA-5R-AA1C | MSS   | LIHC |
| TCGA-5R-AA1D | MSS   | LIHC |
| TCGA-5R-AAAM | MSS   | LIHC |
| TCGA-5S-A9Q8 | MSS   | UCEC |
| TCGA-5T-A9QA | MSS   | BRCA |
| TCGA-5U-AB0D | MSS   | THYM |
| TCGA-5U-AB0E | MSS   | THYM |
| TCGA-5U-AB0F | MSS   | THYM |
| TCGA-5V-A9RR | MSS   | THYM |
| TCGA-5X-AA5U | MSS   | OV   |
| TCGA-60-2695 | MSS   | LUSC |
| TCGA-60-2697 | MSS   | LUSC |
| TCGA-60-2698 | MSS   | LUSC |
| TCGA-60-2703 | MSS   | LUSC |
| TCGA-60-2704 | MSS   | LUSC |
| TCGA-60-2707 | MSS   | LUSC |
| TCGA-60-2708 | MSS   | LUSC |
| TCGA-60-2709 | MSS   | LUSC |
| TCGA-60-2710 | MSS   | LUSC |
| TCGA-60-2711 | MSS   | LUSC |
| TCGA-60-2712 | MSS   | LUSC |
| TCGA-60-2713 | MSS   | LUSC |
| TCGA-60-2714 | MSS   | LUSC |
| TCGA-60-2715 | MSS   | LUSC |
| TCGA-60-2716 | MSS   | LUSC |
| TCGA-60-2719 | MSI-H | LUSC |
| TCGA-60-2720 | MSS   | LUSC |
| TCGA-60-2721 | MSS   | LUSC |

|              |              |      |
|--------------|--------------|------|
| TCGA-60-2722 | MSS          | LUSC |
| TCGA-60-2723 | MSS          | LUSC |
| TCGA-60-2724 | MSS          | LUSC |
| TCGA-60-2725 | MSS          | LUSC |
| TCGA-60-2726 | MSS          | LUSC |
| TCGA-61-1722 | MSS          | OV   |
| TCGA-61-1725 | Intermediate | OV   |
| TCGA-61-1727 | MSS          | OV   |
| TCGA-61-1728 | MSI-H        | OV   |
| TCGA-61-1730 | MSI-H        | OV   |
| TCGA-61-1733 | MSS          | OV   |
| TCGA-61-1734 | MSS          | OV   |
| TCGA-61-1736 | MSS          | OV   |
| TCGA-61-1737 | MSS          | OV   |
| TCGA-61-1738 | MSS          | OV   |
| TCGA-61-1740 | MSS          | OV   |
| TCGA-61-1741 | MSS          | OV   |
| TCGA-61-1895 | MSS          | OV   |
| TCGA-61-1899 | MSS          | OV   |
| TCGA-61-1900 | MSS          | OV   |
| TCGA-61-1901 | MSS          | OV   |
| TCGA-61-1903 | MSS          | OV   |
| TCGA-61-1904 | MSS          | OV   |
| TCGA-61-1906 | MSS          | OV   |
| TCGA-61-1907 | MSS          | OV   |
| TCGA-61-1910 | MSS          | OV   |
| TCGA-61-1911 | MSS          | OV   |
| TCGA-61-1913 | MSS          | OV   |
| TCGA-61-1914 | MSS          | OV   |
| TCGA-61-1915 | MSS          | OV   |
| TCGA-61-1919 | MSI-H        | OV   |
| TCGA-61-1995 | MSS          | OV   |
| TCGA-61-1998 | MSS          | OV   |
| TCGA-61-2000 | MSS          | OV   |
| TCGA-61-2002 | MSS          | OV   |
| TCGA-61-2003 | MSS          | OV   |
| TCGA-61-2012 | MSS          | OV   |
| TCGA-61-2016 | MSS          | OV   |
| TCGA-61-2018 | MSS          | OV   |
| TCGA-61-2087 | MSS          | OV   |
| TCGA-61-2088 | MSS          | OV   |
| TCGA-61-2092 | MSS          | OV   |
| TCGA-61-2094 | MSS          | OV   |
| TCGA-61-2095 | MSS          | OV   |
| TCGA-61-2096 | MSS          | OV   |
| TCGA-61-2097 | MSS          | OV   |
| TCGA-61-2101 | MSS          | OV   |
| TCGA-61-2102 | MSS          | OV   |
| TCGA-61-2104 | MSS          | OV   |
| TCGA-61-2109 | MSS          | OV   |
| TCGA-61-2110 | MSS          | OV   |
| TCGA-61-2111 | MSS          | OV   |

|              |       |      |
|--------------|-------|------|
| TCGA-61-2113 | MSS   | OV   |
| TCGA-61-2610 | MSS   | OV   |
| TCGA-61-2611 | MSS   | OV   |
| TCGA-61-2612 | MSS   | OV   |
| TCGA-61-2613 | MSS   | OV   |
| TCGA-61-2614 | MSS   | OV   |
| TCGA-62-8394 | MSS   | LUAD |
| TCGA-62-8395 | MSS   | LUAD |
| TCGA-62-8397 | MSS   | LUAD |
| TCGA-62-8398 | MSS   | LUAD |
| TCGA-62-8399 | MSS   | LUAD |
| TCGA-62-8402 | MSS   | LUAD |
| TCGA-62-A46O | MSS   | LUAD |
| TCGA-62-A46P | MSS   | LUAD |
| TCGA-62-A46R | MSS   | LUAD |
| TCGA-62-A46S | MSS   | LUAD |
| TCGA-62-A46U | MSS   | LUAD |
| TCGA-62-A46V | MSS   | LUAD |
| TCGA-62-A46Y | MSS   | LUAD |
| TCGA-62-A470 | MSS   | LUAD |
| TCGA-62-A471 | MSS   | LUAD |
| TCGA-62-A472 | MSS   | LUAD |
| TCGA-63-5128 | MSS   | LUSC |
| TCGA-63-5131 | MSS   | LUSC |
| TCGA-63-6202 | MSS   | LUSC |
| TCGA-63-7020 | MSS   | LUSC |
| TCGA-63-7021 | MSS   | LUSC |
| TCGA-63-7022 | MSS   | LUSC |
| TCGA-63-7023 | MSS   | LUSC |
| TCGA-63-A5M9 | MSS   | LUSC |
| TCGA-63-A5MB | MSS   | LUSC |
| TCGA-63-A5MG | MSS   | LUSC |
| TCGA-63-A5MH | MSS   | LUSC |
| TCGA-63-A5MI | MSS   | LUSC |
| TCGA-63-A5MJ | MSS   | LUSC |
| TCGA-63-A5ML | MSS   | LUSC |
| TCGA-63-A5MM | MSI-H | LUSC |
| TCGA-63-A5MN | MSS   | LUSC |
| TCGA-63-A5MP | MSS   | LUSC |
| TCGA-63-A5MR | MSS   | LUSC |
| TCGA-63-A5MS | MSS   | LUSC |
| TCGA-63-A5MT | MSS   | LUSC |
| TCGA-63-A5MU | MSS   | LUSC |
| TCGA-63-A5MV | MSS   | LUSC |
| TCGA-63-A5MW | MSS   | LUSC |
| TCGA-63-A5MY | MSS   | LUSC |
| TCGA-64-1676 | MSS   | LUAD |
| TCGA-64-1677 | MSS   | LUAD |
| TCGA-64-1678 | MSI-H | LUAD |
| TCGA-64-1679 | MSS   | LUAD |
| TCGA-64-1680 | MSS   | LUAD |
| TCGA-64-1681 | MSS   | LUAD |

|              |              |      |
|--------------|--------------|------|
| TCGA-64-5774 | MSS          | LUAD |
| TCGA-64-5775 | MSS          | LUAD |
| TCGA-64-5778 | MSS          | LUAD |
| TCGA-64-5779 | MSS          | LUAD |
| TCGA-64-5781 | MSS          | LUAD |
| TCGA-64-5815 | MSS          | LUAD |
| TCGA-66-2727 | MSS          | LUSC |
| TCGA-66-2734 | MSS          | LUSC |
| TCGA-66-2742 | MSS          | LUSC |
| TCGA-66-2744 | MSS          | LUSC |
| TCGA-66-2754 | MSS          | LUSC |
| TCGA-66-2755 | MSS          | LUSC |
| TCGA-66-2756 | MSS          | LUSC |
| TCGA-66-2757 | MSS          | LUSC |
| TCGA-66-2758 | MSS          | LUSC |
| TCGA-66-2759 | MSS          | LUSC |
| TCGA-66-2763 | MSI-H        | LUSC |
| TCGA-66-2765 | MSS          | LUSC |
| TCGA-66-2766 | MSS          | LUSC |
| TCGA-66-2767 | MSS          | LUSC |
| TCGA-66-2768 | MSI-H        | LUSC |
| TCGA-66-2769 | MSS          | LUSC |
| TCGA-66-2770 | MSS          | LUSC |
| TCGA-66-2771 | MSS          | LUSC |
| TCGA-66-2773 | MSS          | LUSC |
| TCGA-66-2777 | MSS          | LUSC |
| TCGA-66-2778 | MSS          | LUSC |
| TCGA-66-2780 | MSS          | LUSC |
| TCGA-66-2781 | MSS          | LUSC |
| TCGA-66-2782 | MSS          | LUSC |
| TCGA-66-2783 | MSS          | LUSC |
| TCGA-66-2785 | MSS          | LUSC |
| TCGA-66-2786 | MSS          | LUSC |
| TCGA-66-2787 | MSS          | LUSC |
| TCGA-66-2788 | MSS          | LUSC |
| TCGA-66-2789 | MSS          | LUSC |
| TCGA-66-2791 | MSS          | LUSC |
| TCGA-66-2792 | MSS          | LUSC |
| TCGA-66-2793 | Intermediate | LUSC |
| TCGA-66-2794 | MSS          | LUSC |
| TCGA-66-2795 | MSS          | LUSC |
| TCGA-66-2800 | MSS          | LUSC |
| TCGA-67-3770 | MSS          | LUAD |
| TCGA-67-3771 | MSI-H        | LUAD |
| TCGA-67-3772 | MSS          | LUAD |
| TCGA-67-3773 | MSS          | LUAD |
| TCGA-67-3774 | MSS          | LUAD |
| TCGA-67-4679 | MSS          | LUAD |
| TCGA-67-6215 | MSS          | LUAD |
| TCGA-67-6216 | MSS          | LUAD |
| TCGA-67-6217 | MSS          | LUAD |
| TCGA-68-7755 | MSS          | LUSC |

|              |     |      |
|--------------|-----|------|
| TCGA-68-7756 | MSS | LUSC |
| TCGA-68-7757 | MSS | LUSC |
| TCGA-68-8250 | MSS | LUSC |
| TCGA-68-8251 | MSS | LUSC |
| TCGA-68-A59J | MSS | LUSC |
| TCGA-69-7764 | MSS | LUAD |
| TCGA-69-7973 | MSS | LUAD |
| TCGA-69-7974 | MSS | LUAD |
| TCGA-69-7978 | MSS | LUAD |
| TCGA-69-7979 | MSS | LUAD |
| TCGA-69-7980 | MSS | LUAD |
| TCGA-69-8253 | MSS | LUAD |
| TCGA-69-8254 | MSS | LUAD |
| TCGA-69-8255 | MSS | LUAD |
| TCGA-69-A59K | MSS | LUAD |
| TCGA-6A-AB49 | MSS | LUSC |
| TCGA-6D-AA2E | MSS | KIRC |
| TCGA-70-6722 | MSS | LUSC |
| TCGA-70-6723 | MSS | LUSC |
| TCGA-71-6725 | MSS | LUAD |
| TCGA-71-8520 | MSS | LUAD |
| TCGA-73-4658 | MSS | LUAD |
| TCGA-73-4659 | MSS | LUAD |
| TCGA-73-4662 | MSS | LUAD |
| TCGA-73-4666 | MSS | LUAD |
| TCGA-73-4668 | MSS | LUAD |
| TCGA-73-4670 | MSS | LUAD |
| TCGA-73-4675 | MSS | LUAD |
| TCGA-73-4676 | MSS | LUAD |
| TCGA-73-4677 | MSS | LUAD |
| TCGA-73-7498 | MSS | LUAD |
| TCGA-73-7499 | MSS | LUAD |
| TCGA-73-A9RS | MSS | LUAD |
| TCGA-74-6573 | MSS | GBM  |
| TCGA-74-6575 | MSS | GBM  |
| TCGA-74-6577 | MSS | GBM  |
| TCGA-74-6578 | MSS | GBM  |
| TCGA-74-6581 | MSS | GBM  |
| TCGA-74-6584 | MSS | GBM  |
| TCGA-75-5122 | MSS | LUAD |
| TCGA-75-5125 | MSS | LUAD |
| TCGA-75-5126 | MSS | LUAD |
| TCGA-75-5146 | MSS | LUAD |
| TCGA-75-5147 | MSS | LUAD |
| TCGA-75-6203 | MSS | LUAD |
| TCGA-75-6205 | MSS | LUAD |
| TCGA-75-6206 | MSS | LUAD |
| TCGA-75-6207 | MSS | LUAD |
| TCGA-75-6211 | MSS | LUAD |
| TCGA-75-6212 | MSS | LUAD |
| TCGA-75-6214 | MSS | LUAD |
| TCGA-75-7025 | MSS | LUAD |

|              |              |      |
|--------------|--------------|------|
| TCGA-75-7027 | MSS          | LUAD |
| TCGA-75-7030 | MSS          | LUAD |
| TCGA-75-7031 | MSS          | LUAD |
| TCGA-76-4925 | MSS          | GBM  |
| TCGA-76-4926 | MSS          | GBM  |
| TCGA-76-4927 | MSS          | GBM  |
| TCGA-76-4928 | MSS          | GBM  |
| TCGA-76-4929 | MSS          | GBM  |
| TCGA-76-4931 | MSS          | GBM  |
| TCGA-76-4932 | MSS          | GBM  |
| TCGA-76-4934 | MSS          | GBM  |
| TCGA-76-4935 | MSS          | GBM  |
| TCGA-76-6191 | MSS          | GBM  |
| TCGA-76-6192 | MSS          | GBM  |
| TCGA-76-6193 | MSS          | GBM  |
| TCGA-76-6280 | MSS          | GBM  |
| TCGA-76-6282 | MSS          | GBM  |
| TCGA-76-6283 | MSS          | GBM  |
| TCGA-76-6285 | MSS          | GBM  |
| TCGA-76-6286 | MSS          | GBM  |
| TCGA-76-6656 | MSS          | GBM  |
| TCGA-76-6657 | MSS          | GBM  |
| TCGA-76-6660 | MSS          | GBM  |
| TCGA-76-6661 | MSS          | GBM  |
| TCGA-76-6662 | MSS          | GBM  |
| TCGA-76-6663 | MSS          | GBM  |
| TCGA-76-6664 | MSS          | GBM  |
| TCGA-77-6842 | MSS          | LUSC |
| TCGA-77-6843 | MSS          | LUSC |
| TCGA-77-6844 | MSS          | LUSC |
| TCGA-77-6845 | MSS          | LUSC |
| TCGA-77-7138 | MSS          | LUSC |
| TCGA-77-7139 | MSS          | LUSC |
| TCGA-77-7140 | MSS          | LUSC |
| TCGA-77-7141 | MSS          | LUSC |
| TCGA-77-7142 | MSS          | LUSC |
| TCGA-77-7335 | MSS          | LUSC |
| TCGA-77-7337 | MSS          | LUSC |
| TCGA-77-7338 | Intermediate | LUSC |
| TCGA-77-7463 | MSS          | LUSC |
| TCGA-77-7465 | MSS          | LUSC |
| TCGA-77-8008 | MSS          | LUSC |
| TCGA-77-8009 | MSS          | LUSC |
| TCGA-77-8153 | MSS          | LUSC |
| TCGA-77-A5FZ | MSS          | LUSC |
| TCGA-77-A5G1 | MSS          | LUSC |
| TCGA-77-A5G3 | MSS          | LUSC |
| TCGA-77-A5G6 | MSS          | LUSC |
| TCGA-77-A5G7 | MSS          | LUSC |
| TCGA-77-A5G8 | MSS          | LUSC |
| TCGA-77-A5GA | MSS          | LUSC |
| TCGA-77-A5GB | MSS          | LUSC |

|              |     |      |
|--------------|-----|------|
| TCGA-77-A5GF | MSS | LUSC |
| TCGA-77-A5GH | MSS | LUSC |
| TCGA-78-7145 | MSS | LUAD |
| TCGA-78-7146 | MSS | LUAD |
| TCGA-78-7147 | MSS | LUAD |
| TCGA-78-7148 | MSS | LUAD |
| TCGA-78-7149 | MSS | LUAD |
| TCGA-78-7150 | MSS | LUAD |
| TCGA-78-7152 | MSS | LUAD |
| TCGA-78-7153 | MSS | LUAD |
| TCGA-78-7154 | MSS | LUAD |
| TCGA-78-7155 | MSS | LUAD |
| TCGA-78-7156 | MSS | LUAD |
| TCGA-78-7158 | MSS | LUAD |
| TCGA-78-7159 | MSS | LUAD |
| TCGA-78-7160 | MSS | LUAD |
| TCGA-78-7161 | MSS | LUAD |
| TCGA-78-7162 | MSS | LUAD |
| TCGA-78-7163 | MSS | LUAD |
| TCGA-78-7166 | MSS | LUAD |
| TCGA-78-7167 | MSS | LUAD |
| TCGA-78-7220 | MSS | LUAD |
| TCGA-78-7535 | MSS | LUAD |
| TCGA-78-7536 | MSS | LUAD |
| TCGA-78-7537 | MSS | LUAD |
| TCGA-78-7539 | MSS | LUAD |
| TCGA-78-7540 | MSS | LUAD |
| TCGA-78-7542 | MSS | LUAD |
| TCGA-78-7633 | MSS | LUAD |
| TCGA-78-8640 | MSS | LUAD |
| TCGA-78-8648 | MSS | LUAD |
| TCGA-78-8655 | MSS | LUAD |
| TCGA-78-8660 | MSS | LUAD |
| TCGA-78-8662 | MSS | LUAD |
| TCGA-79-5596 | MSS | LUSC |
| TCGA-80-5607 | MSS | LUAD |
| TCGA-80-5608 | MSS | LUAD |
| TCGA-80-5611 | MSS | LUAD |
| TCGA-81-5910 | MSS | GBM  |
| TCGA-81-5911 | MSS | GBM  |
| TCGA-83-5908 | MSS | LUAD |
| TCGA-85-6175 | MSS | LUSC |
| TCGA-85-6560 | MSS | LUSC |
| TCGA-85-6561 | MSS | LUSC |
| TCGA-85-6798 | MSS | LUSC |
| TCGA-85-7696 | MSS | LUSC |
| TCGA-85-7697 | MSS | LUSC |
| TCGA-85-7698 | MSS | LUSC |
| TCGA-85-7699 | MSS | LUSC |
| TCGA-85-7710 | MSS | LUSC |
| TCGA-85-7843 | MSS | LUSC |
| TCGA-85-7844 | MSS | LUSC |

|              |     |      |
|--------------|-----|------|
| TCGA-85-8276 | MSS | LUSC |
| TCGA-85-8277 | MSS | LUSC |
| TCGA-85-8287 | MSS | LUSC |
| TCGA-85-8350 | MSS | LUSC |
| TCGA-85-8351 | MSS | LUSC |
| TCGA-85-8352 | MSS | LUSC |
| TCGA-85-8353 | MSS | LUSC |
| TCGA-85-8354 | MSS | LUSC |
| TCGA-85-8355 | MSS | LUSC |
| TCGA-85-8479 | MSS | LUSC |
| TCGA-85-8481 | MSS | LUSC |
| TCGA-85-8580 | MSS | LUSC |
| TCGA-85-8582 | MSS | LUSC |
| TCGA-85-8584 | MSS | LUSC |
| TCGA-85-8664 | MSS | LUSC |
| TCGA-85-8666 | MSS | LUSC |
| TCGA-85-A4CL | MSS | LUSC |
| TCGA-85-A4CN | MSS | LUSC |
| TCGA-85-A4JB | MSS | LUSC |
| TCGA-85-A4JC | MSS | LUSC |
| TCGA-85-A4PA | MSS | LUSC |
| TCGA-85-A4QQ | MSS | LUSC |
| TCGA-85-A4QR | MSS | LUSC |
| TCGA-85-A50M | MSS | LUSC |
| TCGA-85-A50Z | MSS | LUSC |
| TCGA-85-A510 | MSS | LUSC |
| TCGA-85-A511 | MSS | LUSC |
| TCGA-85-A512 | MSS | LUSC |
| TCGA-85-A513 | MSS | LUSC |
| TCGA-85-A53L | MSS | LUSC |
| TCGA-85-A5B5 | MSS | LUSC |
| TCGA-86-6562 | MSS | LUAD |
| TCGA-86-6851 | MSS | LUAD |
| TCGA-86-7711 | MSS | LUAD |
| TCGA-86-7713 | MSS | LUAD |
| TCGA-86-7953 | MSS | LUAD |
| TCGA-86-8055 | MSS | LUAD |
| TCGA-86-8056 | MSS | LUAD |
| TCGA-86-8076 | MSS | LUAD |
| TCGA-86-8278 | MSS | LUAD |
| TCGA-86-8279 | MSS | LUAD |
| TCGA-86-8280 | MSS | LUAD |
| TCGA-86-8281 | MSS | LUAD |
| TCGA-86-8358 | MSS | LUAD |
| TCGA-86-8359 | MSS | LUAD |
| TCGA-86-8585 | MSS | LUAD |
| TCGA-86-8668 | MSS | LUAD |
| TCGA-86-8669 | MSS | LUAD |
| TCGA-86-8671 | MSS | LUAD |
| TCGA-86-8672 | MSS | LUAD |
| TCGA-86-8673 | MSS | LUAD |
| TCGA-86-8674 | MSS | LUAD |



|              |       |      |
|--------------|-------|------|
| TCGA-86-A456 | MSS   | LUAD |
| TCGA-86-A4D0 | MSS   | LUAD |
| TCGA-86-A4JF | MSI-H | LUAD |
| TCGA-86-A4P7 | MSS   | LUAD |
| TCGA-86-A4P8 | MSS   | LUAD |
| TCGA-87-5896 | MSS   | GBM  |
| TCGA-90-6837 | MSS   | LUSC |
| TCGA-90-7766 | MSS   | LUSC |
| TCGA-90-7767 | MSS   | LUSC |
| TCGA-90-7769 | MSS   | LUSC |
| TCGA-90-7964 | MSS   | LUSC |
| TCGA-90-A4ED | MSS   | LUSC |
| TCGA-90-A4EE | MSS   | LUSC |
| TCGA-90-A59Q | MSS   | LUSC |
| TCGA-91-6828 | MSS   | LUAD |
| TCGA-91-6829 | MSS   | LUAD |
| TCGA-91-6830 | MSS   | LUAD |
| TCGA-91-6831 | MSS   | LUAD |
| TCGA-91-6835 | MSS   | LUAD |
| TCGA-91-6836 | MSS   | LUAD |
| TCGA-91-6840 | MSS   | LUAD |
| TCGA-91-6847 | MSS   | LUAD |
| TCGA-91-6848 | MSS   | LUAD |
| TCGA-91-6849 | MSS   | LUAD |
| TCGA-91-7771 | MSS   | LUAD |
| TCGA-91-8496 | MSS   | LUAD |
| TCGA-91-8497 | MSS   | LUAD |
| TCGA-91-8499 | MSS   | LUAD |
| TCGA-91-A4BC | MSS   | LUAD |
| TCGA-91-A4BD | MSS   | LUAD |
| TCGA-92-7340 | MSS   | LUSC |
| TCGA-92-7341 | MSS   | LUSC |
| TCGA-93-7347 | MSS   | LUAD |
| TCGA-93-7348 | MSS   | LUAD |
| TCGA-93-8067 | MSS   | LUAD |
| TCGA-93-A4JN | MSS   | LUAD |
| TCGA-93-A4JO | MSS   | LUAD |
| TCGA-93-A4JP | MSS   | LUAD |
| TCGA-93-A4JQ | MSS   | LUAD |
| TCGA-94-7033 | MSS   | LUSC |
| TCGA-94-7557 | MSS   | LUSC |
| TCGA-94-7943 | MSS   | LUSC |
| TCGA-94-8490 | MSI-H | LUSC |
| TCGA-94-8491 | MSS   | LUSC |
| TCGA-94-A4VJ | MSS   | LUSC |
| TCGA-94-A5I4 | MSS   | LUSC |
| TCGA-94-A5I6 | MSS   | LUSC |
| TCGA-95-7039 | MSS   | LUAD |
| TCGA-95-7567 | MSI-H | LUAD |
| TCGA-95-7944 | MSS   | LUAD |
| TCGA-95-7947 | MSS   | LUAD |
| TCGA-95-7948 | MSS   | LUAD |

|              |       |      |
|--------------|-------|------|
| TCGA-95-8039 | MSS   | LUAD |
| TCGA-95-8494 | MSS   | LUAD |
| TCGA-95-A4VK | MSS   | LUAD |
| TCGA-95-A4VN | MSS   | LUAD |
| TCGA-95-A4VP | MSS   | LUAD |
| TCGA-96-7544 | MSS   | LUSC |
| TCGA-96-7545 | MSS   | LUSC |
| TCGA-96-8169 | MSS   | LUSC |
| TCGA-96-8170 | MSS   | LUSC |
| TCGA-96-A4JK | MSS   | LUSC |
| TCGA-96-A4JL | MSS   | LUSC |
| TCGA-97-7546 | MSS   | LUAD |
| TCGA-97-7547 | MSS   | LUAD |
| TCGA-97-7552 | MSS   | LUAD |
| TCGA-97-7553 | MSS   | LUAD |
| TCGA-97-7554 | MSS   | LUAD |
| TCGA-97-8171 | MSS   | LUAD |
| TCGA-97-8172 | MSS   | LUAD |
| TCGA-97-8174 | MSS   | LUAD |
| TCGA-97-8175 | MSS   | LUAD |
| TCGA-97-8176 | MSS   | LUAD |
| TCGA-97-8177 | MSS   | LUAD |
| TCGA-97-8179 | MSS   | LUAD |
| TCGA-97-8547 | MSS   | LUAD |
| TCGA-97-8552 | MSS   | LUAD |
| TCGA-97-A4LX | MSS   | LUAD |
| TCGA-97-A4M0 | MSS   | LUAD |
| TCGA-97-A4M1 | MSS   | LUAD |
| TCGA-97-A4M2 | MSS   | LUAD |
| TCGA-97-A4M3 | MSS   | LUAD |
| TCGA-97-A4M5 | MSS   | LUAD |
| TCGA-97-A4M6 | MSS   | LUAD |
| TCGA-97-A4M7 | MSS   | LUAD |
| TCGA-98-7454 | MSS   | LUSC |
| TCGA-98-A538 | MSS   | LUSC |
| TCGA-98-A539 | MSS   | LUSC |
| TCGA-98-A53A | MSS   | LUSC |
| TCGA-98-A53B | MSS   | LUSC |
| TCGA-98-A53C | MSS   | LUSC |
| TCGA-98-A53H | MSS   | LUSC |
| TCGA-98-A53I | MSS   | LUSC |
| TCGA-98-A53J | MSS   | LUSC |
| TCGA-99-7458 | MSS   | LUAD |
| TCGA-99-8025 | MSS   | LUAD |
| TCGA-99-8028 | MSS   | LUAD |
| TCGA-99-8032 | MSS   | LUAD |
| TCGA-99-AA5R | MSS   | LUAD |
| TCGA-A1-A0SD | MSS   | BRCA |
| TCGA-A1-A0SE | MSS   | BRCA |
| TCGA-A1-A0SF | MSI-H | BRCA |
| TCGA-A1-A0SG | MSS   | BRCA |
| TCGA-A1-A0SH | MSS   | BRCA |

|              |              |      |
|--------------|--------------|------|
| TCGA-A1-A0SI | Intermediate | BRCA |
| TCGA-A1-A0SJ | MSS          | BRCA |
| TCGA-A1-A0SK | MSS          | BRCA |
| TCGA-A1-A0SM | MSS          | BRCA |
| TCGA-A1-A0SN | MSS          | BRCA |
| TCGA-A1-A0SO | MSS          | BRCA |
| TCGA-A1-A0SP | Intermediate | BRCA |
| TCGA-A2-A04N | MSS          | BRCA |
| TCGA-A2-A04P | MSS          | BRCA |
| TCGA-A2-A04Q | MSS          | BRCA |
| TCGA-A2-A04R | MSS          | BRCA |
| TCGA-A2-A04T | MSS          | BRCA |
| TCGA-A2-A04U | MSS          | BRCA |
| TCGA-A2-A04V | MSS          | BRCA |
| TCGA-A2-A04W | MSS          | BRCA |
| TCGA-A2-A04X | MSS          | BRCA |
| TCGA-A2-A04Y | MSS          | BRCA |
| TCGA-A2-A0CL | MSS          | BRCA |
| TCGA-A2-A0CM | MSS          | BRCA |
| TCGA-A2-A0CP | MSS          | BRCA |
| TCGA-A2-A0CQ | MSS          | BRCA |
| TCGA-A2-A0CS | MSS          | BRCA |
| TCGA-A2-A0CT | MSS          | BRCA |
| TCGA-A2-A0CU | MSS          | BRCA |
| TCGA-A2-A0CV | MSS          | BRCA |
| TCGA-A2-A0CW | MSS          | BRCA |
| TCGA-A2-A0CX | MSS          | BRCA |
| TCGA-A2-A0D0 | MSS          | BRCA |
| TCGA-A2-A0D1 | MSS          | BRCA |
| TCGA-A2-A0D2 | MSS          | BRCA |
| TCGA-A2-A0D3 | MSS          | BRCA |
| TCGA-A2-A0D4 | MSS          | BRCA |
| TCGA-A2-A0EM | MSS          | BRCA |
| TCGA-A2-A0EN | MSS          | BRCA |
| TCGA-A2-A0EO | MSS          | BRCA |
| TCGA-A2-A0EP | MSS          | BRCA |
| TCGA-A2-A0EQ | MSS          | BRCA |
| TCGA-A2-A0ER | MSS          | BRCA |
| TCGA-A2-A0ES | MSS          | BRCA |
| TCGA-A2-A0ET | MSS          | BRCA |
| TCGA-A2-A0EU | MSS          | BRCA |
| TCGA-A2-A0EV | MSS          | BRCA |
| TCGA-A2-A0EW | MSS          | BRCA |
| TCGA-A2-A0EX | MSS          | BRCA |
| TCGA-A2-A0EY | MSS          | BRCA |
| TCGA-A2-A0ST | MSS          | BRCA |
| TCGA-A2-A0SU | MSS          | BRCA |
| TCGA-A2-A0SV | MSS          | BRCA |
| TCGA-A2-A0SW | MSS          | BRCA |
| TCGA-A2-A0SX | MSS          | BRCA |
| TCGA-A2-A0SY | MSS          | BRCA |
| TCGA-A2-A0T0 | MSS          | BRCA |

|              |              |      |
|--------------|--------------|------|
| TCGA-A2-A0T1 | MSS          | BRCA |
| TCGA-A2-A0T2 | MSS          | BRCA |
| TCGA-A2-A0T3 | MSS          | BRCA |
| TCGA-A2-A0T4 | MSS          | BRCA |
| TCGA-A2-A0T5 | MSS          | BRCA |
| TCGA-A2-A0T6 | MSS          | BRCA |
| TCGA-A2-A0T7 | MSS          | BRCA |
| TCGA-A2-A0YC | MSS          | BRCA |
| TCGA-A2-A0YE | MSS          | BRCA |
| TCGA-A2-A0YF | MSS          | BRCA |
| TCGA-A2-A0YG | MSS          | BRCA |
| TCGA-A2-A0YH | MSS          | BRCA |
| TCGA-A2-A0YI | MSS          | BRCA |
| TCGA-A2-A0YJ | MSS          | BRCA |
| TCGA-A2-A0YK | MSS          | BRCA |
| TCGA-A2-A0YL | MSS          | BRCA |
| TCGA-A2-A0YM | MSS          | BRCA |
| TCGA-A2-A0YT | MSS          | BRCA |
| TCGA-A2-A1FV | MSS          | BRCA |
| TCGA-A2-A1FW | MSS          | BRCA |
| TCGA-A2-A1FX | Intermediate | BRCA |
| TCGA-A2-A1FZ | Intermediate | BRCA |
| TCGA-A2-A1G0 | MSS          | BRCA |
| TCGA-A2-A1G1 | MSS          | BRCA |
| TCGA-A2-A1G4 | MSS          | BRCA |
| TCGA-A2-A1G6 | MSS          | BRCA |
| TCGA-A2-A259 | Intermediate | BRCA |
| TCGA-A2-A25A | MSS          | BRCA |
| TCGA-A2-A25B | MSS          | BRCA |
| TCGA-A2-A25C | Intermediate | BRCA |
| TCGA-A2-A25D | MSS          | BRCA |
| TCGA-A2-A25E | Intermediate | BRCA |
| TCGA-A2-A25F | MSS          | BRCA |
| TCGA-A2-A3KD | MSS          | BRCA |
| TCGA-A2-A3XS | MSS          | BRCA |
| TCGA-A2-A3XT | MSS          | BRCA |
| TCGA-A2-A3XU | MSS          | BRCA |
| TCGA-A2-A3XV | MSS          | BRCA |
| TCGA-A2-A3XW | MSS          | BRCA |
| TCGA-A2-A3XX | MSS          | BRCA |
| TCGA-A2-A3XY | MSS          | BRCA |
| TCGA-A2-A3XZ | MSS          | BRCA |
| TCGA-A2-A3Y0 | MSS          | BRCA |
| TCGA-A2-A4RX | MSS          | BRCA |
| TCGA-A2-A4RY | MSS          | BRCA |
| TCGA-A2-A4S0 | MSS          | BRCA |
| TCGA-A2-A4S1 | MSS          | BRCA |
| TCGA-A2-A4S2 | MSS          | BRCA |
| TCGA-A3-3308 | MSS          | KIRC |
| TCGA-A3-3311 | MSS          | KIRC |
| TCGA-A3-3313 | MSS          | KIRC |
| TCGA-A3-3316 | MSS          | KIRC |

|              |              |      |
|--------------|--------------|------|
| TCGA-A3-3317 | MSS          | KIRC |
| TCGA-A3-3319 | MSS          | KIRC |
| TCGA-A3-3320 | MSS          | KIRC |
| TCGA-A3-3322 | MSI-H        | KIRC |
| TCGA-A3-3323 | MSS          | KIRC |
| TCGA-A3-3326 | MSS          | KIRC |
| TCGA-A3-3331 | MSS          | KIRC |
| TCGA-A3-3346 | MSS          | KIRC |
| TCGA-A3-3357 | MSS          | KIRC |
| TCGA-A3-3358 | MSS          | KIRC |
| TCGA-A3-3363 | MSI-H        | KIRC |
| TCGA-A3-3365 | MSS          | KIRC |
| TCGA-A3-3367 | MSS          | KIRC |
| TCGA-A3-3370 | Intermediate | KIRC |
| TCGA-A3-3372 | MSS          | KIRC |
| TCGA-A3-3373 | MSS          | KIRC |
| TCGA-A3-3374 | MSS          | KIRC |
| TCGA-A3-3376 | MSS          | KIRC |
| TCGA-A3-3378 | MSS          | KIRC |
| TCGA-A3-3380 | MSS          | KIRC |
| TCGA-A3-3382 | MSS          | KIRC |
| TCGA-A3-3383 | MSS          | KIRC |
| TCGA-A3-3385 | MSS          | KIRC |
| TCGA-A3-3387 | MSS          | KIRC |
| TCGA-A3-A6NI | MSS          | KIRC |
| TCGA-A3-A6NJ | MSS          | KIRC |
| TCGA-A3-A6NL | MSS          | KIRC |
| TCGA-A3-A6NN | MSS          | KIRC |
| TCGA-A3-A8CQ | MSS          | KIRC |
| TCGA-A3-A8OU | MSS          | KIRC |
| TCGA-A3-A8OV | MSS          | KIRC |
| TCGA-A3-A8OW | MSS          | KIRC |
| TCGA-A3-A8OX | MSS          | KIRC |
| TCGA-A4-7286 | MSS          | KIRP |
| TCGA-A4-7287 | MSS          | KIRP |
| TCGA-A4-7288 | MSS          | KIRP |
| TCGA-A4-7583 | MSS          | KIRP |
| TCGA-A4-7584 | MSS          | KIRP |
| TCGA-A4-7585 | MSS          | KIRP |
| TCGA-A4-7732 | MSS          | KIRP |
| TCGA-A4-7734 | MSS          | KIRP |
| TCGA-A4-7828 | MSS          | KIRP |
| TCGA-A4-7915 | MSS          | KIRP |
| TCGA-A4-7996 | MSS          | KIRP |
| TCGA-A4-7997 | MSS          | KIRP |
| TCGA-A4-8098 | MSS          | KIRP |
| TCGA-A4-8310 | MSS          | KIRP |
| TCGA-A4-8311 | MSS          | KIRP |
| TCGA-A4-8312 | MSS          | KIRP |
| TCGA-A4-8515 | MSS          | KIRP |
| TCGA-A4-8517 | MSS          | KIRP |
| TCGA-A4-8518 | MSS          | KIRP |

|              |              |      |
|--------------|--------------|------|
| TCGA-A4-8630 | MSS          | KIRP |
| TCGA-A4-A5XZ | MSS          | KIRP |
| TCGA-A4-A5Y0 | MSS          | KIRP |
| TCGA-A4-A6HP | MSS          | KIRP |
| TCGA-A4-A772 | MSS          | KIRP |
| TCGA-A4-A7UZ | MSS          | KIRP |
| TCGA-A5-A0G1 | Intermediate | UCEC |
| TCGA-A5-A0G2 | MSI-H        | UCEC |
| TCGA-A5-A0G3 | Intermediate | UCEC |
| TCGA-A5-A0G5 | MSS          | UCEC |
| TCGA-A5-A0G9 | MSI-H        | UCEC |
| TCGA-A5-A0GA | MSI-H        | UCEC |
| TCGA-A5-A0GB | MSI-H        | UCEC |
| TCGA-A5-A0GD | MSS          | UCEC |
| TCGA-A5-A0GE | MSS          | UCEC |
| TCGA-A5-A0GG | MSI-H        | UCEC |
| TCGA-A5-A0GH | MSI-H        | UCEC |
| TCGA-A5-A0GI | MSI-H        | UCEC |
| TCGA-A5-A0GJ | MSS          | UCEC |
| TCGA-A5-A0GM | MSS          | UCEC |
| TCGA-A5-A0GN | MSS          | UCEC |
| TCGA-A5-A0GP | MSS          | UCEC |
| TCGA-A5-A0GQ | MSS          | UCEC |
| TCGA-A5-A0GR | MSS          | UCEC |
| TCGA-A5-A0GU | MSS          | UCEC |
| TCGA-A5-A0GV | MSS          | UCEC |
| TCGA-A5-A0GW | MSI-H        | UCEC |
| TCGA-A5-A0GX | MSS          | UCEC |
| TCGA-A5-A0R6 | MSS          | UCEC |
| TCGA-A5-A0R7 | MSS          | UCEC |
| TCGA-A5-A0R8 | MSS          | UCEC |
| TCGA-A5-A0R9 | MSS          | UCEC |
| TCGA-A5-A0RA | MSS          | UCEC |
| TCGA-A5-A0VO | MSS          | UCEC |
| TCGA-A5-A0VP | MSI-H        | UCEC |
| TCGA-A5-A0VQ | MSI-H        | UCEC |
| TCGA-A5-A1OF | MSI-H        | UCEC |
| TCGA-A5-A1OG | MSS          | UCEC |
| TCGA-A5-A1OH | MSS          | UCEC |
| TCGA-A5-A2K2 | MSS          | UCEC |
| TCGA-A5-A2K3 | MSI-H        | UCEC |
| TCGA-A5-A2K5 | MSS          | UCEC |
| TCGA-A5-A2K7 | MSI-H        | UCEC |
| TCGA-A5-A3LO | MSS          | UCEC |
| TCGA-A5-A7WJ | MSI-H        | UCEC |
| TCGA-A5-A7WK | MSS          | UCEC |
| TCGA-A5-AB3J | MSS          | UCEC |
| TCGA-A6-2671 | MSS          | COAD |
| TCGA-A6-2672 | MSI-H        | COAD |
| TCGA-A6-2674 | MSS          | COAD |
| TCGA-A6-2674 | MSS          | COAD |
| TCGA-A6-2675 | MSS          | COAD |

|              |              |      |
|--------------|--------------|------|
| TCGA-A6-2677 | MSS          | COAD |
| TCGA-A6-2677 | MSS          | COAD |
| TCGA-A6-2679 | MSS          | COAD |
| TCGA-A6-2680 | MSS          | COAD |
| TCGA-A6-2681 | MSS          | COAD |
| TCGA-A6-2682 | MSS          | COAD |
| TCGA-A6-2684 | MSS          | COAD |
| TCGA-A6-2684 | MSS          | COAD |
| TCGA-A6-2685 | MSS          | COAD |
| TCGA-A6-2686 | MSI-H        | COAD |
| TCGA-A6-3807 | MSS          | COAD |
| TCGA-A6-3809 | MSI-H        | COAD |
| TCGA-A6-3809 | MSI-H        | COAD |
| TCGA-A6-3810 | MSS          | COAD |
| TCGA-A6-3810 | MSS          | COAD |
| TCGA-A6-4105 | MSS          | COAD |
| TCGA-A6-4107 | MSS          | COAD |
| TCGA-A6-5656 | MSS          | COAD |
| TCGA-A6-5656 | MSI-H        | COAD |
| TCGA-A6-5657 | Intermediate | COAD |
| TCGA-A6-5659 | MSS          | COAD |
| TCGA-A6-5659 | Intermediate | COAD |
| TCGA-A6-5660 | MSS          | COAD |
| TCGA-A6-5661 | MSI-H        | COAD |
| TCGA-A6-5662 | MSS          | COAD |
| TCGA-A6-5665 | MSI-H        | COAD |
| TCGA-A6-5665 | MSI-H        | COAD |
| TCGA-A6-5666 | MSS          | COAD |
| TCGA-A6-5667 | MSS          | COAD |
| TCGA-A6-6137 | MSS          | COAD |
| TCGA-A6-6138 | MSS          | COAD |
| TCGA-A6-6140 | MSS          | COAD |
| TCGA-A6-6141 | MSS          | COAD |
| TCGA-A6-6142 | MSS          | COAD |
| TCGA-A6-6648 | MSS          | COAD |
| TCGA-A6-6649 | MSS          | COAD |
| TCGA-A6-6650 | MSS          | COAD |
| TCGA-A6-6651 | MSS          | COAD |
| TCGA-A6-6652 | MSS          | COAD |
| TCGA-A6-6653 | MSI-H        | COAD |
| TCGA-A6-6654 | MSS          | COAD |
| TCGA-A6-6780 | MSI-H        | COAD |
| TCGA-A6-6780 | MSI-H        | COAD |
| TCGA-A6-6781 | MSI-H        | COAD |
| TCGA-A6-6781 | MSI-H        | COAD |
| TCGA-A6-A565 | MSS          | COAD |
| TCGA-A7-A0CD | MSS          | BRCA |
| TCGA-A7-A0CE | MSS          | BRCA |
| TCGA-A7-A0CG | MSS          | BRCA |
| TCGA-A7-A0CJ | MSS          | BRCA |
| TCGA-A7-A0D9 | MSS          | BRCA |
| TCGA-A7-A0DA | MSS          | BRCA |

|              |              |      |
|--------------|--------------|------|
| TCGA-A7-A0DB | MSI-H        | BRCA |
| TCGA-A7-A0DB | MSS          | BRCA |
| TCGA-A7-A13D | MSS          | BRCA |
| TCGA-A7-A13D | MSI-H        | BRCA |
| TCGA-A7-A13E | MSS          | BRCA |
| TCGA-A7-A13E | MSI-H        | BRCA |
| TCGA-A7-A13F | MSS          | BRCA |
| TCGA-A7-A13G | MSS          | BRCA |
| TCGA-A7-A13H | MSS          | BRCA |
| TCGA-A7-A26E | MSI-H        | BRCA |
| TCGA-A7-A26E | MSS          | BRCA |
| TCGA-A7-A26F | MSI-H        | BRCA |
| TCGA-A7-A26F | Intermediate | BRCA |
| TCGA-A7-A26G | MSS          | BRCA |
| TCGA-A7-A26H | MSS          | BRCA |
| TCGA-A7-A26I | MSS          | BRCA |
| TCGA-A7-A26I | MSS          | BRCA |
| TCGA-A7-A26J | MSS          | BRCA |
| TCGA-A7-A26J | MSS          | BRCA |
| TCGA-A7-A3IY | MSS          | BRCA |
| TCGA-A7-A3RF | MSS          | BRCA |
| TCGA-A7-A4SA | MSS          | BRCA |
| TCGA-A7-A4SB | MSS          | BRCA |
| TCGA-A7-A4SC | MSS          | BRCA |
| TCGA-A7-A4SD | MSS          | BRCA |
| TCGA-A7-A4SE | MSS          | BRCA |
| TCGA-A7-A5ZX | MSS          | BRCA |
| TCGA-A7-A6VV | MSS          | BRCA |
| TCGA-A7-A6VW | MSS          | BRCA |
| TCGA-A7-A6VX | MSS          | BRCA |
| TCGA-A7-A6VY | MSS          | BRCA |
| TCGA-A8-A06O | MSS          | BRCA |
| TCGA-A8-A06P | MSS          | BRCA |
| TCGA-A8-A06Q | MSS          | BRCA |
| TCGA-A8-A06R | MSS          | BRCA |
| TCGA-A8-A06T | MSS          | BRCA |
| TCGA-A8-A06U | MSS          | BRCA |
| TCGA-A8-A06X | MSS          | BRCA |
| TCGA-A8-A06Y | MSS          | BRCA |
| TCGA-A8-A06Z | MSS          | BRCA |
| TCGA-A8-A075 | MSS          | BRCA |
| TCGA-A8-A076 | MSS          | BRCA |
| TCGA-A8-A079 | MSS          | BRCA |
| TCGA-A8-A07B | MSS          | BRCA |
| TCGA-A8-A07F | MSS          | BRCA |
| TCGA-A8-A07G | MSS          | BRCA |
| TCGA-A8-A07I | MSS          | BRCA |
| TCGA-A8-A07J | MSS          | BRCA |
| TCGA-A8-A07L | MSS          | BRCA |
| TCGA-A8-A07O | MSS          | BRCA |
| TCGA-A8-A07P | Intermediate | BRCA |
| TCGA-A8-A07R | MSS          | BRCA |



|              |       |      |
|--------------|-------|------|
| TCGA-A8-A07U | MSS   | BRCA |
| TCGA-A8-A07W | MSS   | BRCA |
| TCGA-A8-A07Z | MSS   | BRCA |
| TCGA-A8-A081 | MSS   | BRCA |
| TCGA-A8-A082 | MSS   | BRCA |
| TCGA-A8-A083 | MSS   | BRCA |
| TCGA-A8-A085 | MSS   | BRCA |
| TCGA-A8-A08B | MSS   | BRCA |
| TCGA-A8-A08C | MSS   | BRCA |
| TCGA-A8-A08F | MSS   | BRCA |
| TCGA-A8-A08G | MSS   | BRCA |
| TCGA-A8-A08H | MSS   | BRCA |
| TCGA-A8-A08J | MSS   | BRCA |
| TCGA-A8-A08L | MSS   | BRCA |
| TCGA-A8-A08O | MSS   | BRCA |
| TCGA-A8-A08P | MSS   | BRCA |
| TCGA-A8-A08R | MSS   | BRCA |
| TCGA-A8-A08S | MSS   | BRCA |
| TCGA-A8-A08T | MSS   | BRCA |
| TCGA-A8-A08X | MSS   | BRCA |
| TCGA-A8-A08Z | MSS   | BRCA |
| TCGA-A8-A090 | MSS   | BRCA |
| TCGA-A8-A091 | MSS   | BRCA |
| TCGA-A8-A092 | MSS   | BRCA |
| TCGA-A8-A093 | MSS   | BRCA |
| TCGA-A8-A094 | MSS   | BRCA |
| TCGA-A8-A095 | MSS   | BRCA |
| TCGA-A8-A096 | MSS   | BRCA |
| TCGA-A8-A097 | MSS   | BRCA |
| TCGA-A8-A099 | MSS   | BRCA |
| TCGA-A8-A09A | MSS   | BRCA |
| TCGA-A8-A09B | MSS   | BRCA |
| TCGA-A8-A09C | MSS   | BRCA |
| TCGA-A8-A09D | MSS   | BRCA |
| TCGA-A8-A09E | MSS   | BRCA |
| TCGA-A8-A09G | MSS   | BRCA |
| TCGA-A8-A09I | MSS   | BRCA |
| TCGA-A8-A09K | MSS   | BRCA |
| TCGA-A8-A09M | MSS   | BRCA |
| TCGA-A8-A09N | MSS   | BRCA |
| TCGA-A8-A09Q | MSS   | BRCA |
| TCGA-A8-A09T | MSS   | BRCA |
| TCGA-A8-A09V | MSS   | BRCA |
| TCGA-A8-A09W | MSS   | BRCA |
| TCGA-A8-A09X | MSS   | BRCA |
| TCGA-A8-A09Z | MSI-H | BRCA |
| TCGA-A8-A0A1 | MSS   | BRCA |
| TCGA-A8-A0A2 | MSS   | BRCA |
| TCGA-A8-A0A4 | MSS   | BRCA |
| TCGA-A8-A0A6 | MSS   | BRCA |
| TCGA-A8-A0A7 | MSS   | BRCA |
| TCGA-A8-A0A9 | MSS   | BRCA |

|              |       |      |
|--------------|-------|------|
| TCGA-A8-A0AB | MSS   | BRCA |
| TCGA-A8-A0AD | MSS   | BRCA |
| TCGA-AA-3488 | MSS   | COAD |
| TCGA-AA-3489 | MSS   | COAD |
| TCGA-AA-3492 | MSI-H | COAD |
| TCGA-AA-3494 | MSS   | COAD |
| TCGA-AA-3495 | MSS   | COAD |
| TCGA-AA-3502 | MSS   | COAD |
| TCGA-AA-3506 | MSS   | COAD |
| TCGA-AA-3509 | MSS   | COAD |
| TCGA-AA-3510 | MSS   | COAD |
| TCGA-AA-3511 | MSS   | COAD |
| TCGA-AA-3530 | MSS   | COAD |
| TCGA-AA-3655 | MSS   | COAD |
| TCGA-AA-3660 | MSS   | COAD |
| TCGA-AA-3662 | MSS   | COAD |
| TCGA-AA-3663 | MSI-H | COAD |
| TCGA-AA-3664 | MSS   | COAD |
| TCGA-AA-3666 | MSS   | COAD |
| TCGA-AA-3667 | MSS   | COAD |
| TCGA-AA-3672 | MSI-H | COAD |
| TCGA-AA-3673 | MSS   | COAD |
| TCGA-AA-3675 | MSS   | COAD |
| TCGA-AA-3678 | MSS   | COAD |
| TCGA-AA-3679 | MSS   | COAD |
| TCGA-AA-3680 | MSS   | COAD |
| TCGA-AA-3681 | MSS   | COAD |
| TCGA-AA-3684 | MSS   | COAD |
| TCGA-AA-3685 | MSS   | COAD |
| TCGA-AA-3688 | MSS   | COAD |
| TCGA-AA-3692 | MSS   | COAD |
| TCGA-AA-3693 | MSS   | COAD |
| TCGA-AA-3695 | MSS   | COAD |
| TCGA-AA-3696 | MSS   | COAD |
| TCGA-AA-3697 | MSS   | COAD |
| TCGA-AA-3710 | MSI-H | COAD |
| TCGA-AA-3712 | MSS   | COAD |
| TCGA-AA-3713 | MSI-H | COAD |
| TCGA-AA-3715 | MSI-H | COAD |
| TCGA-AA-3811 | MSI-H | COAD |
| TCGA-AA-3812 | MSS   | COAD |
| TCGA-AA-3814 | MSS   | COAD |
| TCGA-AA-3815 | MSI-H | COAD |
| TCGA-AA-3818 | MSS   | COAD |
| TCGA-AA-3819 | MSS   | COAD |
| TCGA-AA-3821 | MSI-H | COAD |
| TCGA-AA-3831 | MSS   | COAD |
| TCGA-AA-3833 | MSI-H | COAD |
| TCGA-AA-3837 | MSS   | COAD |
| TCGA-AA-3841 | MSS   | COAD |
| TCGA-AA-3842 | MSS   | COAD |
| TCGA-AA-3844 | MSS   | COAD |

|              |       |      |
|--------------|-------|------|
| TCGA-AA-3845 | MSI-H | COAD |
| TCGA-AA-3846 | MSS   | COAD |
| TCGA-AA-3848 | MSS   | COAD |
| TCGA-AA-3850 | MSS   | COAD |
| TCGA-AA-3851 | MSS   | COAD |
| TCGA-AA-3852 | MSS   | COAD |
| TCGA-AA-3854 | MSS   | COAD |
| TCGA-AA-3855 | MSS   | COAD |
| TCGA-AA-3856 | MSS   | COAD |
| TCGA-AA-3858 | MSS   | COAD |
| TCGA-AA-3860 | MSS   | COAD |
| TCGA-AA-3864 | MSI-H | COAD |
| TCGA-AA-3866 | MSS   | COAD |
| TCGA-AA-3867 | MSS   | COAD |
| TCGA-AA-3869 | MSS   | COAD |
| TCGA-AA-3870 | MSS   | COAD |
| TCGA-AA-3872 | MSS   | COAD |
| TCGA-AA-3875 | MSS   | COAD |
| TCGA-AA-3877 | MSI-H | COAD |
| TCGA-AA-3930 | MSS   | COAD |
| TCGA-AA-3939 | MSS   | COAD |
| TCGA-AA-3941 | MSS   | COAD |
| TCGA-AA-3947 | MSI-H | COAD |
| TCGA-AA-3949 | MSI-H | COAD |
| TCGA-AA-3950 | MSI-H | COAD |
| TCGA-AA-3952 | MSS   | COAD |
| TCGA-AA-3955 | MSS   | COAD |
| TCGA-AA-3956 | MSS   | COAD |
| TCGA-AA-3966 | MSI-H | COAD |
| TCGA-AA-3967 | MSS   | COAD |
| TCGA-AA-3968 | MSS   | COAD |
| TCGA-AA-3971 | MSS   | COAD |
| TCGA-AA-3973 | MSS   | COAD |
| TCGA-AA-3975 | MSS   | COAD |
| TCGA-AA-3976 | MSS   | COAD |
| TCGA-AA-3980 | MSS   | COAD |
| TCGA-AA-3982 | MSS   | COAD |
| TCGA-AA-3984 | MSS   | COAD |
| TCGA-AA-3986 | MSS   | COAD |
| TCGA-AA-3989 | MSS   | COAD |
| TCGA-AA-3994 | MSS   | COAD |
| TCGA-AA-A004 | MSS   | COAD |
| TCGA-AA-A00N | MSS   | COAD |
| TCGA-AA-A00O | MSS   | COAD |
| TCGA-AA-A010 | MSI-H | COAD |
| TCGA-AA-A017 | MSS   | COAD |
| TCGA-AA-A01C | MSS   | COAD |
| TCGA-AA-A01D | MSS   | COAD |
| TCGA-AA-A01I | MSS   | COAD |
| TCGA-AA-A01K | MSS   | COAD |
| TCGA-AA-A01P | MSI-H | COAD |
| TCGA-AA-A01R | MSI-H | COAD |

|              |              |      |
|--------------|--------------|------|
| TCGA-AA-A01S | MSS          | COAD |
| TCGA-AA-A01T | MSS          | COAD |
| TCGA-AA-A01V | MSS          | COAD |
| TCGA-AA-A01X | MSS          | COAD |
| TCGA-AA-A01Z | MSS          | COAD |
| TCGA-AA-A022 | MSI-H        | COAD |
| TCGA-AA-A024 | Intermediate | COAD |
| TCGA-AA-A029 | MSS          | COAD |
| TCGA-AA-A02E | MSS          | COAD |
| TCGA-AA-A02F | MSS          | COAD |
| TCGA-AA-A02H | MSS          | COAD |
| TCGA-AA-A02J | Intermediate | COAD |
| TCGA-AA-A02K | MSS          | COAD |
| TCGA-AA-A02O | MSS          | COAD |
| TCGA-AA-A02R | MSI-H        | COAD |
| TCGA-AA-A02W | MSS          | COAD |
| TCGA-AA-A02Y | MSS          | COAD |
| TCGA-AA-A03F | MSS          | COAD |
| TCGA-AA-A03J | MSS          | COAD |
| TCGA-AB-2802 | MSS          | LAML |
| TCGA-AB-2803 | MSS          | LAML |
| TCGA-AB-2804 | MSS          | LAML |
| TCGA-AB-2805 | MSS          | LAML |
| TCGA-AB-2806 | MSS          | LAML |
| TCGA-AB-2807 | MSS          | LAML |
| TCGA-AB-2807 | MSS          | LAML |
| TCGA-AB-2808 | MSS          | LAML |
| TCGA-AB-2808 | MSI-H        | LAML |
| TCGA-AB-2809 | MSS          | LAML |
| TCGA-AB-2810 | MSS          | LAML |
| TCGA-AB-2811 | MSS          | LAML |
| TCGA-AB-2812 | MSS          | LAML |
| TCGA-AB-2813 | MSS          | LAML |
| TCGA-AB-2814 | MSS          | LAML |
| TCGA-AB-2815 | MSS          | LAML |
| TCGA-AB-2816 | MSS          | LAML |
| TCGA-AB-2817 | MSS          | LAML |
| TCGA-AB-2818 | MSS          | LAML |
| TCGA-AB-2819 | MSS          | LAML |
| TCGA-AB-2820 | MSS          | LAML |
| TCGA-AB-2821 | MSS          | LAML |
| TCGA-AB-2822 | MSS          | LAML |
| TCGA-AB-2823 | MSS          | LAML |
| TCGA-AB-2824 | MSS          | LAML |
| TCGA-AB-2825 | MSS          | LAML |
| TCGA-AB-2825 | MSS          | LAML |
| TCGA-AB-2826 | MSS          | LAML |
| TCGA-AB-2827 | MSS          | LAML |
| TCGA-AB-2828 | MSS          | LAML |
| TCGA-AB-2830 | MSS          | LAML |
| TCGA-AB-2831 | MSS          | LAML |
| TCGA-AB-2832 | MSS          | LAML |

|              |              |      |
|--------------|--------------|------|
| TCGA-AB-2833 | MSS          | LAML |
| TCGA-AB-2835 | MSS          | LAML |
| TCGA-AB-2836 | MSS          | LAML |
| TCGA-AB-2838 | MSS          | LAML |
| TCGA-AB-2839 | MSS          | LAML |
| TCGA-AB-2840 | Intermediate | LAML |
| TCGA-AB-2840 | MSS          | LAML |
| TCGA-AB-2842 | MSS          | LAML |
| TCGA-AB-2843 | MSS          | LAML |
| TCGA-AB-2844 | MSS          | LAML |
| TCGA-AB-2845 | MSS          | LAML |
| TCGA-AB-2850 | MSS          | LAML |
| TCGA-AB-2851 | MSS          | LAML |
| TCGA-AB-2853 | MSS          | LAML |
| TCGA-AB-2854 | MSS          | LAML |
| TCGA-AB-2856 | MSS          | LAML |
| TCGA-AB-2857 | MSS          | LAML |
| TCGA-AB-2858 | MSS          | LAML |
| TCGA-AB-2859 | MSS          | LAML |
| TCGA-AB-2860 | MSS          | LAML |
| TCGA-AB-2861 | MSS          | LAML |
| TCGA-AB-2863 | MSS          | LAML |
| TCGA-AB-2864 | MSS          | LAML |
| TCGA-AB-2864 | Intermediate | LAML |
| TCGA-AB-2865 | MSS          | LAML |
| TCGA-AB-2866 | MSS          | LAML |
| TCGA-AB-2867 | MSS          | LAML |
| TCGA-AB-2868 | MSS          | LAML |
| TCGA-AB-2869 | MSS          | LAML |
| TCGA-AB-2870 | MSS          | LAML |
| TCGA-AB-2871 | MSS          | LAML |
| TCGA-AB-2872 | MSS          | LAML |
| TCGA-AB-2873 | MSS          | LAML |
| TCGA-AB-2874 | MSS          | LAML |
| TCGA-AB-2875 | MSS          | LAML |
| TCGA-AB-2876 | MSS          | LAML |
| TCGA-AB-2877 | MSS          | LAML |
| TCGA-AB-2878 | MSS          | LAML |
| TCGA-AB-2879 | MSS          | LAML |
| TCGA-AB-2880 | MSS          | LAML |
| TCGA-AB-2881 | MSS          | LAML |
| TCGA-AB-2882 | MSS          | LAML |
| TCGA-AB-2887 | MSS          | LAML |
| TCGA-AB-2888 | MSS          | LAML |
| TCGA-AB-2889 | MSS          | LAML |
| TCGA-AB-2890 | MSS          | LAML |
| TCGA-AB-2895 | MSS          | LAML |
| TCGA-AB-2896 | MSS          | LAML |
| TCGA-AB-2898 | MSS          | LAML |
| TCGA-AB-2899 | MSS          | LAML |
| TCGA-AB-2900 | MSS          | LAML |
| TCGA-AB-2901 | MSS          | LAML |

|              |              |      |
|--------------|--------------|------|
| TCGA-AB-2903 | MSS          | LAML |
| TCGA-AB-2908 | MSS          | LAML |
| TCGA-AB-2909 | MSS          | LAML |
| TCGA-AB-2910 | MSS          | LAML |
| TCGA-AB-2915 | MSS          | LAML |
| TCGA-AB-2918 | Intermediate | LAML |
| TCGA-AB-2919 | MSS          | LAML |
| TCGA-AB-2921 | MSS          | LAML |
| TCGA-AB-2922 | MSS          | LAML |
| TCGA-AB-2923 | MSS          | LAML |
| TCGA-AB-2924 | MSS          | LAML |
| TCGA-AB-2925 | MSS          | LAML |
| TCGA-AB-2926 | MSS          | LAML |
| TCGA-AB-2927 | MSS          | LAML |
| TCGA-AB-2928 | MSS          | LAML |
| TCGA-AB-2930 | MSS          | LAML |
| TCGA-AB-2931 | MSS          | LAML |
| TCGA-AB-2932 | MSI-H        | LAML |
| TCGA-AB-2933 | MSS          | LAML |
| TCGA-AB-2934 | Intermediate | LAML |
| TCGA-AB-2935 | Intermediate | LAML |
| TCGA-AB-2936 | MSS          | LAML |
| TCGA-AB-2937 | MSS          | LAML |
| TCGA-AB-2938 | MSS          | LAML |
| TCGA-AB-2939 | Intermediate | LAML |
| TCGA-AB-2941 | Intermediate | LAML |
| TCGA-AB-2943 | Intermediate | LAML |
| TCGA-AB-2945 | MSS          | LAML |
| TCGA-AB-2946 | MSS          | LAML |
| TCGA-AB-2947 | MSS          | LAML |
| TCGA-AB-2948 | MSS          | LAML |
| TCGA-AB-2949 | MSS          | LAML |
| TCGA-AB-2950 | MSS          | LAML |
| TCGA-AB-2954 | MSS          | LAML |
| TCGA-AB-2955 | MSS          | LAML |
| TCGA-AB-2956 | MSS          | LAML |
| TCGA-AB-2957 | MSS          | LAML |
| TCGA-AB-2959 | MSS          | LAML |
| TCGA-AC-A23C | MSS          | BRCA |
| TCGA-AC-A23E | MSS          | BRCA |
| TCGA-AC-A23G | MSS          | BRCA |
| TCGA-AC-A23H | MSS          | BRCA |
| TCGA-AC-A2B8 | MSS          | BRCA |
| TCGA-AC-A2BM | MSS          | BRCA |
| TCGA-AC-A2FB | MSS          | BRCA |
| TCGA-AC-A2FF | MSS          | BRCA |
| TCGA-AC-A2FG | Intermediate | BRCA |
| TCGA-AC-A2FK | MSS          | BRCA |
| TCGA-AC-A2FM | MSS          | BRCA |
| TCGA-AC-A2FO | MSS          | BRCA |
| TCGA-AC-A2QH | MSS          | BRCA |
| TCGA-AC-A2QH | MSS          | BRCA |

|              |              |      |
|--------------|--------------|------|
| TCGA-AC-A2QJ | MSS          | BRCA |
| TCGA-AC-A2QJ | MSS          | BRCA |
| TCGA-AC-A3BB | MSS          | BRCA |
| TCGA-AC-A3OD | MSS          | BRCA |
| TCGA-AC-A3OD | MSS          | BRCA |
| TCGA-AC-A3QQ | Intermediate | BRCA |
| TCGA-AC-A3QQ | MSS          | BRCA |
| TCGA-AC-A3W5 | MSS          | BRCA |
| TCGA-AC-A3W6 | MSS          | BRCA |
| TCGA-AC-A3W7 | MSS          | BRCA |
| TCGA-AC-A3YJ | MSS          | BRCA |
| TCGA-AC-A4ZE | MSS          | BRCA |
| TCGA-AC-A5XS | MSS          | BRCA |
| TCGA-AC-A62V | MSS          | BRCA |
| TCGA-AC-A62Y | MSS          | BRCA |
| TCGA-AC-A6IV | MSS          | BRCA |
| TCGA-AC-A6IW | MSS          | BRCA |
| TCGA-AC-A6IX | MSS          | BRCA |
| TCGA-AC-A6IX | MSS          | BRCA |
| TCGA-AC-A6NO | MSS          | BRCA |
| TCGA-AC-A7VB | MSS          | BRCA |
| TCGA-AC-A7VC | MSS          | BRCA |
| TCGA-AC-A8OP | MSS          | BRCA |
| TCGA-AC-A8OQ | MSS          | BRCA |
| TCGA-AC-A8OR | MSS          | BRCA |
| TCGA-AC-A8OS | MSS          | BRCA |
| TCGA-AD-5900 | MSI-H        | COAD |
| TCGA-AD-6888 | MSS          | COAD |
| TCGA-AD-6889 | MSI-H        | COAD |
| TCGA-AD-6890 | MSS          | COAD |
| TCGA-AD-6895 | MSI-H        | COAD |
| TCGA-AD-6899 | MSS          | COAD |
| TCGA-AD-6901 | MSS          | COAD |
| TCGA-AD-6963 | MSS          | COAD |
| TCGA-AD-6964 | MSI-H        | COAD |
| TCGA-AD-6965 | MSS          | COAD |
| TCGA-AD-A5EJ | MSI-H        | COAD |
| TCGA-AF-2687 | MSS          | READ |
| TCGA-AF-2690 | MSS          | READ |
| TCGA-AF-2693 | MSS          | READ |
| TCGA-AF-3911 | MSS          | READ |
| TCGA-AF-3913 | MSS          | READ |
| TCGA-AF-3914 | MSS          | READ |
| TCGA-AF-4110 | MSS          | READ |
| TCGA-AF-5654 | MSS          | READ |
| TCGA-AF-6136 | MSS          | READ |
| TCGA-AF-6655 | MSS          | READ |
| TCGA-AF-6672 | MSS          | READ |
| TCGA-AF-A56K | MSS          | READ |
| TCGA-AF-A56L | MSS          | READ |
| TCGA-AF-A56N | MSS          | READ |
| TCGA-AG-3591 | MSS          | READ |

|              |              |      |
|--------------|--------------|------|
| TCGA-AG-3592 | MSS          | READ |
| TCGA-AG-3725 | MSS          | READ |
| TCGA-AG-3726 | MSS          | READ |
| TCGA-AG-3727 | MSS          | READ |
| TCGA-AG-3728 | MSS          | READ |
| TCGA-AG-3731 | MSS          | READ |
| TCGA-AG-3732 | MSS          | READ |
| TCGA-AG-3742 | MSS          | READ |
| TCGA-AG-3878 | MSS          | READ |
| TCGA-AG-3881 | MSS          | READ |
| TCGA-AG-3882 | MSS          | READ |
| TCGA-AG-3883 | MSS          | READ |
| TCGA-AG-3885 | MSS          | READ |
| TCGA-AG-3887 | MSS          | READ |
| TCGA-AG-3890 | MSS          | READ |
| TCGA-AG-3891 | MSI-H        | READ |
| TCGA-AG-3892 | MSS          | READ |
| TCGA-AG-3893 | MSS          | READ |
| TCGA-AG-3894 | MSS          | READ |
| TCGA-AG-3896 | MSS          | READ |
| TCGA-AG-3898 | MSS          | READ |
| TCGA-AG-3901 | MSS          | READ |
| TCGA-AG-3902 | MSS          | READ |
| TCGA-AG-3906 | MSI-H        | READ |
| TCGA-AG-3909 | MSS          | READ |
| TCGA-AG-3999 | Intermediate | READ |
| TCGA-AG-4001 | MSI-H        | READ |
| TCGA-AG-4005 | MSS          | READ |
| TCGA-AG-4007 | MSS          | READ |
| TCGA-AG-4008 | MSS          | READ |
| TCGA-AG-4009 | MSS          | READ |
| TCGA-AG-4015 | Intermediate | READ |
| TCGA-AG-4021 | MSS          | READ |
| TCGA-AG-4022 | MSS          | READ |
| TCGA-AG-A002 | MSI-H        | READ |
| TCGA-AG-A008 | MSS          | READ |
| TCGA-AG-A00C | MSS          | READ |
| TCGA-AG-A00H | MSS          | READ |
| TCGA-AG-A00Y | MSS          | READ |
| TCGA-AG-A011 | MSS          | READ |
| TCGA-AG-A014 | MSS          | READ |
| TCGA-AG-A015 | MSS          | READ |
| TCGA-AG-A016 | MSS          | READ |
| TCGA-AG-A01J | MSS          | READ |
| TCGA-AG-A01L | MSS          | READ |
| TCGA-AG-A01N | MSS          | READ |
| TCGA-AG-A01W | MSS          | READ |
| TCGA-AG-A01Y | MSS          | READ |
| TCGA-AG-A020 | MSS          | READ |
| TCGA-AG-A023 | MSS          | READ |
| TCGA-AG-A025 | MSS          | READ |
| TCGA-AG-A026 | MSS          | READ |



|              |       |      |
|--------------|-------|------|
| TCGA-AG-A02G | MSS   | READ |
| TCGA-AG-A02N | MSI-H | READ |
| TCGA-AG-A02X | MSS   | READ |
| TCGA-AG-A032 | MSS   | READ |
| TCGA-AG-A036 | MSS   | READ |
| TCGA-AH-6544 | MSS   | READ |
| TCGA-AH-6547 | MSS   | READ |
| TCGA-AH-6549 | MSS   | READ |
| TCGA-AH-6643 | MSS   | READ |
| TCGA-AH-6644 | MSS   | READ |
| TCGA-AH-6897 | MSS   | READ |
| TCGA-AH-6903 | MSS   | READ |
| TCGA-AJ-A23M | MSS   | UCEC |
| TCGA-AJ-A23N | MSS   | UCEC |
| TCGA-AJ-A23O | MSI-H | UCEC |
| TCGA-AJ-A2QL | MSS   | UCEC |
| TCGA-AJ-A2QM | MSS   | UCEC |
| TCGA-AJ-A2QN | MSS   | UCEC |
| TCGA-AJ-A2QO | MSI-H | UCEC |
| TCGA-AJ-A3BD | MSS   | UCEC |
| TCGA-AJ-A3BF | MSS   | UCEC |
| TCGA-AJ-A3BG | MSI-H | UCEC |
| TCGA-AJ-A3BH | MSI-H | UCEC |
| TCGA-AJ-A3BK | MSS   | UCEC |
| TCGA-AJ-A3EJ | MSS   | UCEC |
| TCGA-AJ-A3EK | MSI-H | UCEC |
| TCGA-AJ-A3EL | MSI-H | UCEC |
| TCGA-AJ-A3IA | MSS   | UCEC |
| TCGA-AJ-A3NC | MSS   | UCEC |
| TCGA-AJ-A3NE | MSI-H | UCEC |
| TCGA-AJ-A3NG | MSS   | UCEC |
| TCGA-AJ-A3OJ | MSI-H | UCEC |
| TCGA-AJ-A3OK | MSI-H | UCEC |
| TCGA-AJ-A3QS | MSS   | UCEC |
| TCGA-AJ-A3TW | MSS   | UCEC |
| TCGA-AJ-A5DV | MSS   | UCEC |
| TCGA-AJ-A5DW | MSS   | UCEC |
| TCGA-AJ-A6NU | MSS   | UCEC |
| TCGA-AJ-A8CT | MSI-H | UCEC |
| TCGA-AJ-A8CV | MSI-H | UCEC |
| TCGA-AJ-A8CW | MSI-H | UCEC |
| TCGA-AK-3427 | MSI-H | KIRC |
| TCGA-AK-3440 | MSS   | KIRC |
| TCGA-AK-3443 | MSS   | KIRC |
| TCGA-AK-3444 | MSS   | KIRC |
| TCGA-AK-3447 | MSS   | KIRC |
| TCGA-AK-3453 | MSS   | KIRC |
| TCGA-AK-3455 | MSS   | KIRC |
| TCGA-AK-3465 | MSS   | KIRC |
| TCGA-AL-3466 | MSS   | KIRP |
| TCGA-AL-3467 | MSS   | KIRP |
| TCGA-AL-3468 | MSS   | KIRP |

|              |       |      |
|--------------|-------|------|
| TCGA-AL-3472 | MSS   | KIRP |
| TCGA-AL-3473 | MSS   | KIRP |
| TCGA-AL-7173 | MSS   | KIRP |
| TCGA-AM-5820 | MSS   | COAD |
| TCGA-AM-5821 | MSI-H | COAD |
| TCGA-AN-A03X | MSS   | BRCA |
| TCGA-AN-A03Y | MSS   | BRCA |
| TCGA-AN-A041 | MSS   | BRCA |
| TCGA-AN-A046 | MSS   | BRCA |
| TCGA-AN-A049 | MSS   | BRCA |
| TCGA-AN-A04A | MSS   | BRCA |
| TCGA-AN-A04C | MSS   | BRCA |
| TCGA-AN-A04D | MSS   | BRCA |
| TCGA-AN-A0AJ | MSS   | BRCA |
| TCGA-AN-A0AK | MSI-H | BRCA |
| TCGA-AN-A0AL | MSS   | BRCA |
| TCGA-AN-A0AM | MSS   | BRCA |
| TCGA-AN-A0AR | MSS   | BRCA |
| TCGA-AN-A0AS | MSS   | BRCA |
| TCGA-AN-A0AT | MSS   | BRCA |
| TCGA-AN-A0FD | MSS   | BRCA |
| TCGA-AN-A0FF | MSS   | BRCA |
| TCGA-AN-A0FJ | MSS   | BRCA |
| TCGA-AN-A0FK | MSS   | BRCA |
| TCGA-AN-A0FL | MSS   | BRCA |
| TCGA-AN-A0FN | MSS   | BRCA |
| TCGA-AN-A0FS | MSS   | BRCA |
| TCGA-AN-A0FT | MSS   | BRCA |
| TCGA-AN-A0FV | MSS   | BRCA |
| TCGA-AN-A0FW | MSS   | BRCA |
| TCGA-AN-A0FX | MSS   | BRCA |
| TCGA-AN-A0FY | MSS   | BRCA |
| TCGA-AN-A0FZ | MSS   | BRCA |
| TCGA-AN-A0G0 | MSS   | BRCA |
| TCGA-AN-A0XN | MSS   | BRCA |
| TCGA-AN-A0XP | MSS   | BRCA |
| TCGA-AN-A0XR | MSS   | BRCA |
| TCGA-AN-A0XS | MSS   | BRCA |
| TCGA-AN-A0XT | MSS   | BRCA |
| TCGA-AN-A0XU | MSS   | BRCA |
| TCGA-AN-A0XV | MSS   | BRCA |
| TCGA-AN-A0XW | MSS   | BRCA |
| TCGA-AO-A03L | MSS   | BRCA |
| TCGA-AO-A03O | MSS   | BRCA |
| TCGA-AO-A03P | MSS   | BRCA |
| TCGA-AO-A03R | MSS   | BRCA |
| TCGA-AO-A03T | MSS   | BRCA |
| TCGA-AO-A03V | MSS   | BRCA |
| TCGA-AO-A0J2 | MSS   | BRCA |
| TCGA-AO-A0J3 | MSS   | BRCA |
| TCGA-AO-A0J4 | MSS   | BRCA |
| TCGA-AO-A0J5 | MSS   | BRCA |

|              |              |      |
|--------------|--------------|------|
| TCGA-AO-A0J6 | MSS          | BRCA |
| TCGA-AO-A0J7 | MSS          | BRCA |
| TCGA-AO-A0J8 | MSS          | BRCA |
| TCGA-AO-A0J9 | MSS          | BRCA |
| TCGA-AO-A0JA | MSS          | BRCA |
| TCGA-AO-A0JB | MSS          | BRCA |
| TCGA-AO-A0JC | MSS          | BRCA |
| TCGA-AO-A0JD | MSS          | BRCA |
| TCGA-AO-A0JE | MSS          | BRCA |
| TCGA-AO-A0JF | MSS          | BRCA |
| TCGA-AO-A0JG | MSS          | BRCA |
| TCGA-AO-A0JI | MSS          | BRCA |
| TCGA-AO-A0JJ | MSS          | BRCA |
| TCGA-AO-A0JM | MSS          | BRCA |
| TCGA-AO-A124 | MSS          | BRCA |
| TCGA-AO-A12A | MSS          | BRCA |
| TCGA-AO-A12D | MSS          | BRCA |
| TCGA-AO-A12F | MSS          | BRCA |
| TCGA-AO-A12H | MSS          | BRCA |
| TCGA-AO-A1KO | MSS          | BRCA |
| TCGA-AO-A1KP | MSS          | BRCA |
| TCGA-AO-A1KR | MSS          | BRCA |
| TCGA-AO-A1KS | MSS          | BRCA |
| TCGA-AO-A1KT | MSI-H        | BRCA |
| TCGA-AP-A051 | MSI-H        | UCEC |
| TCGA-AP-A052 | MSS          | UCEC |
| TCGA-AP-A053 | MSS          | UCEC |
| TCGA-AP-A054 | MSI-H        | UCEC |
| TCGA-AP-A056 | Intermediate | UCEC |
| TCGA-AP-A059 | MSI-H        | UCEC |
| TCGA-AP-A05A | MSS          | UCEC |
| TCGA-AP-A05D | MSS          | UCEC |
| TCGA-AP-A05H | MSS          | UCEC |
| TCGA-AP-A05J | MSS          | UCEC |
| TCGA-AP-A05N | MSI-H        | UCEC |
| TCGA-AP-A05O | MSI-H        | UCEC |
| TCGA-AP-A05P | MSS          | UCEC |
| TCGA-AP-A0L8 | MSS          | UCEC |
| TCGA-AP-A0L9 | MSS          | UCEC |
| TCGA-AP-A0LD | MSI-H        | UCEC |
| TCGA-AP-A0LE | MSI-H        | UCEC |
| TCGA-AP-A0LF | MSS          | UCEC |
| TCGA-AP-A0LG | MSI-H        | UCEC |
| TCGA-AP-A0LH | MSS          | UCEC |
| TCGA-AP-A0LI | MSS          | UCEC |
| TCGA-AP-A0LJ | MSS          | UCEC |
| TCGA-AP-A0LL | MSS          | UCEC |
| TCGA-AP-A0LM | MSI-H        | UCEC |
| TCGA-AP-A0LN | MSS          | UCEC |
| TCGA-AP-A0LO | MSS          | UCEC |
| TCGA-AP-A0LP | MSI-H        | UCEC |
| TCGA-AP-A0LQ | MSS          | UCEC |

|              |              |      |
|--------------|--------------|------|
| TCGA-AP-A0LS | MSI-H        | UCEC |
| TCGA-AP-A0LT | MSI-H        | UCEC |
| TCGA-AP-A0LV | MSS          | UCEC |
| TCGA-AP-A1DK | MSI-H        | UCEC |
| TCGA-AP-A1DM | MSI-H        | UCEC |
| TCGA-AP-A1DO | MSI-H        | UCEC |
| TCGA-AP-A1DP | MSI-H        | UCEC |
| TCGA-AP-A1DQ | MSS          | UCEC |
| TCGA-AP-A1DR | MSI-H        | UCEC |
| TCGA-AP-A1E4 | MSS          | UCEC |
| TCGA-AP-A3K1 | MSS          | UCEC |
| TCGA-AP-A5FX | Intermediate | UCEC |
| TCGA-AQ-A04H | MSS          | BRCA |
| TCGA-AQ-A04J | MSS          | BRCA |
| TCGA-AQ-A1H2 | MSS          | BRCA |
| TCGA-AQ-A1H3 | Intermediate | BRCA |
| TCGA-AQ-A7U7 | MSS          | BRCA |
| TCGA-AR-A0TP | MSS          | BRCA |
| TCGA-AR-A0TQ | MSS          | BRCA |
| TCGA-AR-A0TR | MSS          | BRCA |
| TCGA-AR-A0TS | MSS          | BRCA |
| TCGA-AR-A0TT | MSS          | BRCA |
| TCGA-AR-A0TU | MSS          | BRCA |
| TCGA-AR-A0TV | MSS          | BRCA |
| TCGA-AR-A0TW | MSS          | BRCA |
| TCGA-AR-A0TX | MSS          | BRCA |
| TCGA-AR-A0TY | MSI-H        | BRCA |
| TCGA-AR-A0TZ | MSS          | BRCA |
| TCGA-AR-A0U0 | MSS          | BRCA |
| TCGA-AR-A0U1 | MSS          | BRCA |
| TCGA-AR-A0U2 | MSS          | BRCA |
| TCGA-AR-A0U3 | MSS          | BRCA |
| TCGA-AR-A1AH | MSS          | BRCA |
| TCGA-AR-A1AI | Intermediate | BRCA |
| TCGA-AR-A1AJ | MSS          | BRCA |
| TCGA-AR-A1AK | MSS          | BRCA |
| TCGA-AR-A1AL | MSS          | BRCA |
| TCGA-AR-A1AN | MSS          | BRCA |
| TCGA-AR-A1AO | MSS          | BRCA |
| TCGA-AR-A1AP | MSS          | BRCA |
| TCGA-AR-A1AQ | MSS          | BRCA |
| TCGA-AR-A1AR | MSS          | BRCA |
| TCGA-AR-A1AS | MSS          | BRCA |
| TCGA-AR-A1AT | MSS          | BRCA |
| TCGA-AR-A1AU | MSS          | BRCA |
| TCGA-AR-A1AV | MSS          | BRCA |
| TCGA-AR-A1AW | MSS          | BRCA |
| TCGA-AR-A1AX | MSS          | BRCA |
| TCGA-AR-A1AY | MSS          | BRCA |
| TCGA-AR-A24H | Intermediate | BRCA |
| TCGA-AR-A24K | MSS          | BRCA |
| TCGA-AR-A24L | MSS          | BRCA |

|              |              |      |
|--------------|--------------|------|
| TCGA-AR-A24M | MSS          | BRCA |
| TCGA-AR-A24N | MSS          | BRCA |
| TCGA-AR-A24O | MSS          | BRCA |
| TCGA-AR-A24P | MSS          | BRCA |
| TCGA-AR-A24Q | MSS          | BRCA |
| TCGA-AR-A24R | MSS          | BRCA |
| TCGA-AR-A24S | MSS          | BRCA |
| TCGA-AR-A24T | MSS          | BRCA |
| TCGA-AR-A24U | Intermediate | BRCA |
| TCGA-AR-A24V | Intermediate | BRCA |
| TCGA-AR-A24W | MSS          | BRCA |
| TCGA-AR-A24X | MSS          | BRCA |
| TCGA-AR-A24Z | MSS          | BRCA |
| TCGA-AR-A250 | MSS          | BRCA |
| TCGA-AR-A251 | Intermediate | BRCA |
| TCGA-AR-A252 | MSS          | BRCA |
| TCGA-AR-A254 | Intermediate | BRCA |
| TCGA-AR-A255 | MSI-H        | BRCA |
| TCGA-AR-A256 | MSI-H        | BRCA |
| TCGA-AR-A2LE | MSS          | BRCA |
| TCGA-AR-A2LH | MSS          | BRCA |
| TCGA-AR-A2LK | MSS          | BRCA |
| TCGA-AR-A2LL | MSS          | BRCA |
| TCGA-AR-A2LM | MSS          | BRCA |
| TCGA-AR-A2LN | MSS          | BRCA |
| TCGA-AR-A2LO | MSS          | BRCA |
| TCGA-AR-A2LQ | MSS          | BRCA |
| TCGA-AR-A2LR | MSS          | BRCA |
| TCGA-AR-A5QP | MSS          | BRCA |
| TCGA-AR-A5QQ | MSS          | BRCA |
| TCGA-AS-3777 | MSS          | KIRC |
| TCGA-AS-3778 | MSS          | KIRC |
| TCGA-AU-3779 | MSS          | COAD |
| TCGA-AU-6004 | MSI-H        | COAD |
| TCGA-AX-A05S | MSI-H        | UCEC |
| TCGA-AX-A05T | MSS          | UCEC |
| TCGA-AX-A05U | MSS          | UCEC |
| TCGA-AX-A05W | MSS          | UCEC |
| TCGA-AX-A05Y | MSI-H        | UCEC |
| TCGA-AX-A05Z | MSS          | UCEC |
| TCGA-AX-A062 | MSS          | UCEC |
| TCGA-AX-A063 | MSI-H        | UCEC |
| TCGA-AX-A064 | MSI-H        | UCEC |
| TCGA-AX-A06B | MSS          | UCEC |
| TCGA-AX-A06D | MSI-H        | UCEC |
| TCGA-AX-A06F | Intermediate | UCEC |
| TCGA-AX-A06H | MSI-H        | UCEC |
| TCGA-AX-A06J | MSS          | UCEC |
| TCGA-AX-A06L | MSS          | UCEC |
| TCGA-AX-A0IS | MSS          | UCEC |
| TCGA-AX-A0IU | MSS          | UCEC |
| TCGA-AX-A0IW | MSS          | UCEC |

|              |              |      |
|--------------|--------------|------|
| TCGA-AX-A0IZ | MSI-H        | UCEC |
| TCGA-AX-A0J0 | Intermediate | UCEC |
| TCGA-AX-A0J1 | MSI-H        | UCEC |
| TCGA-AX-A1C4 | MSI-H        | UCEC |
| TCGA-AX-A1C5 | MSI-H        | UCEC |
| TCGA-AX-A1C7 | MSS          | UCEC |
| TCGA-AX-A1C8 | MSS          | UCEC |
| TCGA-AX-A1C9 | MSI-H        | UCEC |
| TCGA-AX-A1CA | MSI-H        | UCEC |
| TCGA-AX-A1CC | MSI-H        | UCEC |
| TCGA-AX-A1CE | MSI-H        | UCEC |
| TCGA-AX-A1CF | MSS          | UCEC |
| TCGA-AX-A1CI | MSI-H        | UCEC |
| TCGA-AX-A1CK | MSS          | UCEC |
| TCGA-AX-A1CP | MSS          | UCEC |
| TCGA-AX-A1CR | MSS          | UCEC |
| TCGA-AX-A2H5 | MSS          | UCEC |
| TCGA-AX-A2H7 | MSS          | UCEC |
| TCGA-AX-A2HA | MSI-H        | UCEC |
| TCGA-AX-A2HC | MSI-H        | UCEC |
| TCGA-AX-A2HD | MSI-H        | UCEC |
| TCGA-AX-A2HF | MSS          | UCEC |
| TCGA-AX-A2HG | MSI-H        | UCEC |
| TCGA-AX-A2HJ | MSI-H        | UCEC |
| TCGA-AX-A2IO | MSS          | UCEC |
| TCGA-AX-A3FS | MSI-H        | UCEC |
| TCGA-AX-A3FT | MSI-H        | UCEC |
| TCGA-AX-A3FW | MSS          | UCEC |
| TCGA-AX-A3FX | MSS          | UCEC |
| TCGA-AX-A3FZ | MSS          | UCEC |
| TCGA-AX-A3G4 | MSS          | UCEC |
| TCGA-AX-A3G7 | MSS          | UCEC |
| TCGA-AX-A3G8 | MSI-H        | UCEC |
| TCGA-AX-A3G9 | MSI-H        | UCEC |
| TCGA-AX-A3GB | MSS          | UCEC |
| TCGA-AY-4070 | MSS          | COAD |
| TCGA-AY-4071 | MSS          | COAD |
| TCGA-AY-5543 | MSS          | COAD |
| TCGA-AY-6196 | MSS          | COAD |
| TCGA-AY-6197 | MSI-H        | COAD |
| TCGA-AY-6386 | MSS          | COAD |
| TCGA-AY-A69D | MSS          | COAD |
| TCGA-AY-A71X | MSS          | COAD |
| TCGA-AY-A8YK | MSS          | COAD |
| TCGA-AZ-4308 | Intermediate | COAD |
| TCGA-AZ-4313 | MSI-H        | COAD |
| TCGA-AZ-4315 | Intermediate | COAD |
| TCGA-AZ-4614 | Intermediate | COAD |
| TCGA-AZ-4615 | MSI-H        | COAD |
| TCGA-AZ-4681 | MSS          | COAD |
| TCGA-AZ-4682 | MSS          | COAD |
| TCGA-AZ-4684 | MSS          | COAD |

|              |       |      |
|--------------|-------|------|
| TCGA-AZ-5403 | MSS   | COAD |
| TCGA-AZ-5407 | MSS   | COAD |
| TCGA-AZ-6598 | MSI-H | COAD |
| TCGA-AZ-6599 | MSS   | COAD |
| TCGA-AZ-6600 | MSS   | COAD |
| TCGA-AZ-6601 | MSI-H | COAD |
| TCGA-AZ-6606 | MSS   | COAD |
| TCGA-AZ-6607 | MSS   | COAD |
| TCGA-AZ-6608 | MSS   | COAD |
| TCGA-B0-4700 | MSS   | KIRC |
| TCGA-B0-4823 | MSS   | KIRC |
| TCGA-B0-4827 | MSS   | KIRC |
| TCGA-B0-4842 | MSS   | KIRC |
| TCGA-B0-4945 | MSS   | KIRC |
| TCGA-B0-5075 | MSS   | KIRC |
| TCGA-B0-5077 | MSS   | KIRC |
| TCGA-B0-5081 | MSS   | KIRC |
| TCGA-B0-5083 | MSS   | KIRC |
| TCGA-B0-5084 | MSS   | KIRC |
| TCGA-B0-5085 | MSS   | KIRC |
| TCGA-B0-5088 | MSS   | KIRC |
| TCGA-B0-5092 | MSS   | KIRC |
| TCGA-B0-5094 | MSS   | KIRC |
| TCGA-B0-5095 | MSS   | KIRC |
| TCGA-B0-5096 | MSS   | KIRC |
| TCGA-B0-5097 | MSS   | KIRC |
| TCGA-B0-5098 | MSI-H | KIRC |
| TCGA-B0-5099 | MSS   | KIRC |
| TCGA-B0-5100 | MSS   | KIRC |
| TCGA-B0-5102 | MSS   | KIRC |
| TCGA-B0-5104 | MSS   | KIRC |
| TCGA-B0-5106 | MSS   | KIRC |
| TCGA-B0-5107 | MSS   | KIRC |
| TCGA-B0-5108 | MSS   | KIRC |
| TCGA-B0-5109 | MSS   | KIRC |
| TCGA-B0-5110 | MSS   | KIRC |
| TCGA-B0-5113 | MSS   | KIRC |
| TCGA-B0-5115 | MSS   | KIRC |
| TCGA-B0-5116 | MSS   | KIRC |
| TCGA-B0-5117 | MSS   | KIRC |
| TCGA-B0-5119 | MSS   | KIRC |
| TCGA-B0-5120 | MSS   | KIRC |
| TCGA-B0-5121 | MSS   | KIRC |
| TCGA-B0-5399 | MSS   | KIRC |
| TCGA-B0-5400 | MSS   | KIRC |
| TCGA-B0-5402 | MSS   | KIRC |
| TCGA-B0-5690 | MSS   | KIRC |
| TCGA-B0-5691 | MSS   | KIRC |
| TCGA-B0-5692 | MSS   | KIRC |
| TCGA-B0-5693 | MSS   | KIRC |
| TCGA-B0-5694 | MSS   | KIRC |
| TCGA-B0-5695 | MSS   | KIRC |

|              |       |      |
|--------------|-------|------|
| TCGA-B0-5696 | MSS   | KIRC |
| TCGA-B0-5697 | MSS   | KIRC |
| TCGA-B0-5698 | MSS   | KIRC |
| TCGA-B0-5699 | MSS   | KIRC |
| TCGA-B0-5700 | MSS   | KIRC |
| TCGA-B0-5701 | MSS   | KIRC |
| TCGA-B0-5702 | MSS   | KIRC |
| TCGA-B0-5703 | MSS   | KIRC |
| TCGA-B0-5705 | MSS   | KIRC |
| TCGA-B0-5706 | MSS   | KIRC |
| TCGA-B0-5707 | MSS   | KIRC |
| TCGA-B0-5709 | MSS   | KIRC |
| TCGA-B0-5710 | MSS   | KIRC |
| TCGA-B0-5711 | MSS   | KIRC |
| TCGA-B0-5712 | MSS   | KIRC |
| TCGA-B0-5713 | MSS   | KIRC |
| TCGA-B0-5812 | MSS   | KIRC |
| TCGA-B1-5398 | MSS   | KIRP |
| TCGA-B1-7332 | MSS   | KIRP |
| TCGA-B1-A654 | MSS   | KIRP |
| TCGA-B1-A655 | MSS   | KIRP |
| TCGA-B1-A656 | MSS   | KIRP |
| TCGA-B1-A657 | MSS   | KIRP |
| TCGA-B2-4101 | MSS   | KIRC |
| TCGA-B2-4102 | MSS   | KIRC |
| TCGA-B2-5633 | MSS   | KIRC |
| TCGA-B2-5633 | MSS   | KIRC |
| TCGA-B2-5635 | MSS   | KIRC |
| TCGA-B2-5636 | MSS   | KIRC |
| TCGA-B2-5639 | MSS   | KIRC |
| TCGA-B2-5641 | MSS   | KIRC |
| TCGA-B2-A4SR | MSS   | KIRC |
| TCGA-B3-3925 | MSS   | KIRP |
| TCGA-B3-3926 | MSS   | KIRP |
| TCGA-B3-4103 | MSS   | KIRP |
| TCGA-B3-4104 | MSS   | KIRP |
| TCGA-B3-8121 | MSS   | KIRP |
| TCGA-B3-A6W5 | MSS   | KIRP |
| TCGA-B4-5377 | MSS   | KIRC |
| TCGA-B4-5378 | MSS   | KIRC |
| TCGA-B4-5832 | MSS   | KIRC |
| TCGA-B4-5834 | MSS   | KIRC |
| TCGA-B4-5835 | MSS   | KIRC |
| TCGA-B4-5836 | MSS   | KIRC |
| TCGA-B4-5838 | MSS   | KIRC |
| TCGA-B4-5843 | MSS   | KIRC |
| TCGA-B4-5844 | MSS   | KIRC |
| TCGA-B5-A0JN | MSS   | UCEC |
| TCGA-B5-A0JR | MSI-H | UCEC |
| TCGA-B5-A0JS | MSS   | UCEC |
| TCGA-B5-A0JT | MSS   | UCEC |
| TCGA-B5-A0JU | MSI-H | UCEC |



|              |              |      |
|--------------|--------------|------|
| TCGA-B5-A0JV | MSI-H        | UCEC |
| TCGA-B5-A0JY | Intermediate | UCEC |
| TCGA-B5-A0JZ | MSI-H        | UCEC |
| TCGA-B5-A0K0 | MSS          | UCEC |
| TCGA-B5-A0K1 | MSS          | UCEC |
| TCGA-B5-A0K2 | MSI-H        | UCEC |
| TCGA-B5-A0K3 | MSS          | UCEC |
| TCGA-B5-A0K4 | MSS          | UCEC |
| TCGA-B5-A0K6 | MSI-H        | UCEC |
| TCGA-B5-A0K7 | MSS          | UCEC |
| TCGA-B5-A0K8 | MSS          | UCEC |
| TCGA-B5-A0K9 | MSI-H        | UCEC |
| TCGA-B5-A11E | MSI-H        | UCEC |
| TCGA-B5-A11F | MSS          | UCEC |
| TCGA-B5-A11G | MSI-H        | UCEC |
| TCGA-B5-A11H | MSI-H        | UCEC |
| TCGA-B5-A11I | Intermediate | UCEC |
| TCGA-B5-A11J | MSI-H        | UCEC |
| TCGA-B5-A11M | MSS          | UCEC |
| TCGA-B5-A11N | MSS          | UCEC |
| TCGA-B5-A11O | MSS          | UCEC |
| TCGA-B5-A11Q | MSS          | UCEC |
| TCGA-B5-A11R | MSS          | UCEC |
| TCGA-B5-A11S | MSS          | UCEC |
| TCGA-B5-A11U | MSI-H        | UCEC |
| TCGA-B5-A11V | MSS          | UCEC |
| TCGA-B5-A11W | MSS          | UCEC |
| TCGA-B5-A11X | MSS          | UCEC |
| TCGA-B5-A11Y | MSI-H        | UCEC |
| TCGA-B5-A11Z | MSS          | UCEC |
| TCGA-B5-A121 | MSS          | UCEC |
| TCGA-B5-A1MR | MSS          | UCEC |
| TCGA-B5-A1MS | MSS          | UCEC |
| TCGA-B5-A1MU | MSS          | UCEC |
| TCGA-B5-A1MV | MSS          | UCEC |
| TCGA-B5-A1MW | MSI-H        | UCEC |
| TCGA-B5-A1MX | MSI-H        | UCEC |
| TCGA-B5-A1MY | MSS          | UCEC |
| TCGA-B5-A1N2 | MSI-H        | UCEC |
| TCGA-B5-A3F9 | MSS          | UCEC |
| TCGA-B5-A3FA | MSI-H        | UCEC |
| TCGA-B5-A3FC | MSI-H        | UCEC |
| TCGA-B5-A5OC | MSI-H        | UCEC |
| TCGA-B5-A5OD | MSS          | UCEC |
| TCGA-B5-A5OE | MSS          | UCEC |
| TCGA-B6-A0I1 | MSS          | BRCA |
| TCGA-B6-A0I2 | MSS          | BRCA |
| TCGA-B6-A0I5 | MSS          | BRCA |
| TCGA-B6-A0I6 | MSS          | BRCA |
| TCGA-B6-A0I6 | MSS          | BRCA |
| TCGA-B6-A0I8 | MSS          | BRCA |
| TCGA-B6-A0I9 | MSS          | BRCA |

|              |       |      |
|--------------|-------|------|
| TCGA-B6-A0IA | MSS   | BRCA |
| TCGA-B6-A0IB | MSS   | BRCA |
| TCGA-B6-A0IC | MSS   | BRCA |
| TCGA-B6-A0IE | MSS   | BRCA |
| TCGA-B6-A0IH | MSS   | BRCA |
| TCGA-B6-A0IJ | MSS   | BRCA |
| TCGA-B6-A0IK | MSS   | BRCA |
| TCGA-B6-A0IM | MSS   | BRCA |
| TCGA-B6-A0IN | MSS   | BRCA |
| TCGA-B6-A0RE | MSS   | BRCA |
| TCGA-B6-A0RG | MSS   | BRCA |
| TCGA-B6-A0RH | MSS   | BRCA |
| TCGA-B6-A0RI | MSS   | BRCA |
| TCGA-B6-A0RL | MSS   | BRCA |
| TCGA-B6-A0RM | MSS   | BRCA |
| TCGA-B6-A0RN | MSS   | BRCA |
| TCGA-B6-A0RO | MSS   | BRCA |
| TCGA-B6-A0RP | MSS   | BRCA |
| TCGA-B6-A0RQ | MSS   | BRCA |
| TCGA-B6-A0RS | MSS   | BRCA |
| TCGA-B6-A0RT | MSS   | BRCA |
| TCGA-B6-A0RU | MSS   | BRCA |
| TCGA-B6-A0RV | MSS   | BRCA |
| TCGA-B6-A0WS | MSS   | BRCA |
| TCGA-B6-A0WT | MSS   | BRCA |
| TCGA-B6-A0WV | MSS   | BRCA |
| TCGA-B6-A0WW | MSS   | BRCA |
| TCGA-B6-A0WX | MSS   | BRCA |
| TCGA-B6-A0WY | MSS   | BRCA |
| TCGA-B6-A0WZ | MSS   | BRCA |
| TCGA-B6-A0X0 | MSS   | BRCA |
| TCGA-B6-A0X1 | MSS   | BRCA |
| TCGA-B6-A0X4 | MSS   | BRCA |
| TCGA-B6-A0X5 | MSS   | BRCA |
| TCGA-B6-A1KC | MSS   | BRCA |
| TCGA-B6-A1KF | MSS   | BRCA |
| TCGA-B6-A1KI | MSS   | BRCA |
| TCGA-B6-A1KN | MSS   | BRCA |
| TCGA-B6-A2IU | MSS   | BRCA |
| TCGA-B6-A400 | MSS   | BRCA |
| TCGA-B6-A401 | MSS   | BRCA |
| TCGA-B6-A402 | MSS   | BRCA |
| TCGA-B6-A409 | MSS   | BRCA |
| TCGA-B6-A40B | MSS   | BRCA |
| TCGA-B7-5816 | MSI-H | STAD |
| TCGA-B7-5818 | MSS   | STAD |
| TCGA-B7-A5TI | MSI-H | STAD |
| TCGA-B7-A5TJ | MSS   | STAD |
| TCGA-B7-A5TK | MSS   | STAD |
| TCGA-B7-A5TN | MSS   | STAD |
| TCGA-B8-4143 | MSS   | KIRC |
| TCGA-B8-4146 | MSS   | KIRC |

|              |     |      |
|--------------|-----|------|
| TCGA-B8-4148 | MSS | KIRC |
| TCGA-B8-4151 | MSS | KIRC |
| TCGA-B8-4153 | MSS | KIRC |
| TCGA-B8-4621 | MSS | KIRC |
| TCGA-B8-4622 | MSS | KIRC |
| TCGA-B8-5158 | MSS | KIRC |
| TCGA-B8-5159 | MSS | KIRC |
| TCGA-B8-5162 | MSS | KIRC |
| TCGA-B8-5163 | MSS | KIRC |
| TCGA-B8-5164 | MSS | KIRC |
| TCGA-B8-5165 | MSS | KIRC |
| TCGA-B8-5545 | MSS | KIRC |
| TCGA-B8-5546 | MSS | KIRC |
| TCGA-B8-5549 | MSS | KIRC |
| TCGA-B8-5550 | MSS | KIRC |
| TCGA-B8-5551 | MSS | KIRC |
| TCGA-B8-5552 | MSS | KIRC |
| TCGA-B8-5553 | MSS | KIRC |
| TCGA-B8-A54H | MSS | KIRC |
| TCGA-B8-A54I | MSS | KIRC |
| TCGA-B8-A54J | MSS | KIRC |
| TCGA-B8-A54K | MSS | KIRC |
| TCGA-B8-A7U6 | MSS | KIRC |
| TCGA-B8-A8YJ | MSS | KIRC |
| TCGA-B9-4113 | MSS | KIRP |
| TCGA-B9-4114 | MSS | KIRP |
| TCGA-B9-4115 | MSS | KIRP |
| TCGA-B9-4116 | MSS | KIRP |
| TCGA-B9-4117 | MSS | KIRP |
| TCGA-B9-4617 | MSS | KIRP |
| TCGA-B9-5155 | MSS | KIRP |
| TCGA-B9-5156 | MSS | KIRP |
| TCGA-B9-7268 | MSS | KIRP |
| TCGA-B9-A5W7 | MSS | KIRP |
| TCGA-B9-A69E | MSS | KIRP |
| TCGA-B9-A8YH | MSS | KIRP |
| TCGA-B9-A8YI | MSS | KIRP |
| TCGA-BA-4074 | MSS | HNSC |
| TCGA-BA-4075 | MSS | HNSC |
| TCGA-BA-4076 | MSS | HNSC |
| TCGA-BA-4077 | MSS | HNSC |
| TCGA-BA-4078 | MSS | HNSC |
| TCGA-BA-5149 | MSS | HNSC |
| TCGA-BA-5151 | MSS | HNSC |
| TCGA-BA-5152 | MSS | HNSC |
| TCGA-BA-5153 | MSS | HNSC |
| TCGA-BA-5555 | MSS | HNSC |
| TCGA-BA-5556 | MSS | HNSC |
| TCGA-BA-5557 | MSS | HNSC |
| TCGA-BA-5558 | MSS | HNSC |
| TCGA-BA-5559 | MSS | HNSC |
| TCGA-BA-6868 | MSS | HNSC |

|              |       |      |
|--------------|-------|------|
| TCGA-BA-6869 | MSS   | HNSC |
| TCGA-BA-6870 | MSS   | HNSC |
| TCGA-BA-6871 | MSS   | HNSC |
| TCGA-BA-6872 | MSS   | HNSC |
| TCGA-BA-6873 | MSS   | HNSC |
| TCGA-BA-7269 | MSS   | HNSC |
| TCGA-BA-A4IF | MSS   | HNSC |
| TCGA-BA-A4IG | MSS   | HNSC |
| TCGA-BA-A4IH | MSS   | HNSC |
| TCGA-BA-A4II | MSS   | HNSC |
| TCGA-BA-A6D8 | MSS   | HNSC |
| TCGA-BA-A6DA | MSS   | HNSC |
| TCGA-BA-A6DB | MSS   | HNSC |
| TCGA-BA-A6DD | MSS   | HNSC |
| TCGA-BA-A6DE | MSS   | HNSC |
| TCGA-BA-A6DF | MSS   | HNSC |
| TCGA-BA-A6DG | MSS   | HNSC |
| TCGA-BA-A6DI | MSS   | HNSC |
| TCGA-BA-A6DJ | MSS   | HNSC |
| TCGA-BA-A6DL | MSS   | HNSC |
| TCGA-BA-A8YP | MSS   | HNSC |
| TCGA-BB-4217 | MSS   | HNSC |
| TCGA-BB-4223 | MSS   | HNSC |
| TCGA-BB-4224 | MSS   | HNSC |
| TCGA-BB-4225 | MSS   | HNSC |
| TCGA-BB-4227 | MSS   | HNSC |
| TCGA-BB-4228 | MSS   | HNSC |
| TCGA-BB-7870 | MSS   | HNSC |
| TCGA-BB-8596 | MSS   | HNSC |
| TCGA-BB-8601 | MSS   | HNSC |
| TCGA-BB-A5HU | MSS   | HNSC |
| TCGA-BB-A5HY | MSS   | HNSC |
| TCGA-BB-A5HZ | MSS   | HNSC |
| TCGA-BB-A6UM | MSS   | HNSC |
| TCGA-BB-A6UO | MSS   | HNSC |
| TCGA-BC-4073 | MSS   | LIHC |
| TCGA-BC-A10Q | MSS   | LIHC |
| TCGA-BC-A10R | MSS   | LIHC |
| TCGA-BC-A10S | MSS   | LIHC |
| TCGA-BC-A10T | MSS   | LIHC |
| TCGA-BC-A10U | MSS   | LIHC |
| TCGA-BC-A10W | MSS   | LIHC |
| TCGA-BC-A10X | MSS   | LIHC |
| TCGA-BC-A10Y | MSS   | LIHC |
| TCGA-BC-A10Z | MSS   | LIHC |
| TCGA-BC-A110 | MSS   | LIHC |
| TCGA-BC-A112 | MSI-H | LIHC |
| TCGA-BC-A216 | MSS   | LIHC |
| TCGA-BC-A217 | MSS   | LIHC |
| TCGA-BC-A3KG | MSS   | LIHC |
| TCGA-BC-A69H | MSS   | LIHC |
| TCGA-BC-A69I | MSS   | LIHC |

|              |              |      |
|--------------|--------------|------|
| TCGA-BC-A8YO | MSS          | LIHC |
| TCGA-BD-A3EP | MSS          | LIHC |
| TCGA-BD-A3ER | MSS          | LIHC |
| TCGA-BF-A1PU | MSS          | SKCM |
| TCGA-BF-A1PX | MSS          | SKCM |
| TCGA-BF-A1PZ | MSS          | SKCM |
| TCGA-BF-A1Q0 | MSS          | SKCM |
| TCGA-BF-A3DL | MSS          | SKCM |
| TCGA-BF-A5EO | MSS          | SKCM |
| TCGA-BF-A5EP | MSS          | SKCM |
| TCGA-BF-A5EQ | MSS          | SKCM |
| TCGA-BF-A5ER | MSS          | SKCM |
| TCGA-BF-A5ES | MSS          | SKCM |
| TCGA-BF-A9VF | MSS          | SKCM |
| TCGA-BF-AAOU | MSS          | SKCM |
| TCGA-BF-AAOX | MSS          | SKCM |
| TCGA-BF-AAP0 | MSS          | SKCM |
| TCGA-BF-AAP1 | MSS          | SKCM |
| TCGA-BF-AAP2 | MSS          | SKCM |
| TCGA-BF-AAP4 | MSS          | SKCM |
| TCGA-BF-AAP6 | MSS          | SKCM |
| TCGA-BF-AAP7 | MSS          | SKCM |
| TCGA-BF-AAP8 | MSS          | SKCM |
| TCGA-BG-A0LW | MSS          | UCEC |
| TCGA-BG-A0LX | MSI-H        | UCEC |
| TCGA-BG-A0M0 | MSI-H        | UCEC |
| TCGA-BG-A0M2 | MSS          | UCEC |
| TCGA-BG-A0M3 | MSS          | UCEC |
| TCGA-BG-A0M4 | MSI-H        | UCEC |
| TCGA-BG-A0M6 | Intermediate | UCEC |
| TCGA-BG-A0M7 | MSS          | UCEC |
| TCGA-BG-A0M8 | MSS          | UCEC |
| TCGA-BG-A0M9 | MSS          | UCEC |
| TCGA-BG-A0MC | MSS          | UCEC |
| TCGA-BG-A0MG | MSS          | UCEC |
| TCGA-BG-A0MI | MSS          | UCEC |
| TCGA-BG-A0MK | MSS          | UCEC |
| TCGA-BG-A0MO | MSS          | UCEC |
| TCGA-BG-A0MQ | MSI-H        | UCEC |
| TCGA-BG-A0MS | Intermediate | UCEC |
| TCGA-BG-A0MT | MSS          | UCEC |
| TCGA-BG-A0MU | MSS          | UCEC |
| TCGA-BG-A0RY | MSS          | UCEC |
| TCGA-BG-A0VT | MSS          | UCEC |
| TCGA-BG-A0VV | MSS          | UCEC |
| TCGA-BG-A0VW | MSI-H        | UCEC |
| TCGA-BG-A0VX | MSS          | UCEC |
| TCGA-BG-A0VZ | MSI-H        | UCEC |
| TCGA-BG-A0W1 | MSS          | UCEC |
| TCGA-BG-A0W2 | MSS          | UCEC |
| TCGA-BG-A0YU | MSS          | UCEC |
| TCGA-BG-A0YV | MSS          | UCEC |

|              |       |      |
|--------------|-------|------|
| TCGA-BG-A186 | MSS   | UCEC |
| TCGA-BG-A187 | MSS   | UCEC |
| TCGA-BG-A18A | MSS   | UCEC |
| TCGA-BG-A18B | MSI-H | UCEC |
| TCGA-BG-A18C | MSS   | UCEC |
| TCGA-BG-A220 | MSI-H | UCEC |
| TCGA-BG-A221 | MSI-H | UCEC |
| TCGA-BG-A222 | MSI-H | UCEC |
| TCGA-BG-A2AE | MSS   | UCEC |
| TCGA-BG-A2L7 | MSI-H | UCEC |
| TCGA-BG-A3EW | MSI-H | UCEC |
| TCGA-BH-A0AU | MSS   | BRCA |
| TCGA-BH-A0AV | MSS   | BRCA |
| TCGA-BH-A0AW | MSS   | BRCA |
| TCGA-BH-A0AY | MSS   | BRCA |
| TCGA-BH-A0AZ | MSS   | BRCA |
| TCGA-BH-A0B0 | MSS   | BRCA |
| TCGA-BH-A0B3 | MSS   | BRCA |
| TCGA-BH-A0B4 | MSS   | BRCA |
| TCGA-BH-A0B5 | MSS   | BRCA |
| TCGA-BH-A0B6 | MSS   | BRCA |
| TCGA-BH-A0B7 | MSS   | BRCA |
| TCGA-BH-A0B8 | MSS   | BRCA |
| TCGA-BH-A0B9 | MSS   | BRCA |
| TCGA-BH-A0BA | MSS   | BRCA |
| TCGA-BH-A0BC | MSS   | BRCA |
| TCGA-BH-A0BD | MSS   | BRCA |
| TCGA-BH-A0BF | MSS   | BRCA |
| TCGA-BH-A0BG | MSS   | BRCA |
| TCGA-BH-A0BJ | MSS   | BRCA |
| TCGA-BH-A0BL | MSS   | BRCA |
| TCGA-BH-A0BM | MSS   | BRCA |
| TCGA-BH-A0BO | MSS   | BRCA |
| TCGA-BH-A0BP | MSS   | BRCA |
| TCGA-BH-A0BQ | MSS   | BRCA |
| TCGA-BH-A0BR | MSS   | BRCA |
| TCGA-BH-A0BS | MSS   | BRCA |
| TCGA-BH-A0BT | MSS   | BRCA |
| TCGA-BH-A0BV | MSS   | BRCA |
| TCGA-BH-A0BW | MSS   | BRCA |
| TCGA-BH-A0BZ | MSS   | BRCA |
| TCGA-BH-A0C0 | MSS   | BRCA |
| TCGA-BH-A0C1 | MSS   | BRCA |
| TCGA-BH-A0C3 | MSS   | BRCA |
| TCGA-BH-A0C7 | MSS   | BRCA |
| TCGA-BH-A0DD | MSS   | BRCA |
| TCGA-BH-A0DE | MSS   | BRCA |
| TCGA-BH-A0DG | MSS   | BRCA |
| TCGA-BH-A0DH | MSS   | BRCA |
| TCGA-BH-A0DI | MSS   | BRCA |
| TCGA-BH-A0DK | MSS   | BRCA |
| TCGA-BH-A0DL | MSS   | BRCA |

|              |       |      |
|--------------|-------|------|
| TCGA-BH-A0DO | MSS   | BRCA |
| TCGA-BH-A0DP | MSS   | BRCA |
| TCGA-BH-A0DQ | MSS   | BRCA |
| TCGA-BH-A0DS | MSS   | BRCA |
| TCGA-BH-A0DT | MSS   | BRCA |
| TCGA-BH-A0DV | MSS   | BRCA |
| TCGA-BH-A0DX | MSS   | BRCA |
| TCGA-BH-A0DZ | MSS   | BRCA |
| TCGA-BH-A0E0 | MSS   | BRCA |
| TCGA-BH-A0E1 | MSS   | BRCA |
| TCGA-BH-A0E2 | MSS   | BRCA |
| TCGA-BH-A0E7 | MSS   | BRCA |
| TCGA-BH-A0E9 | MSS   | BRCA |
| TCGA-BH-A0EA | MSS   | BRCA |
| TCGA-BH-A0EB | MSS   | BRCA |
| TCGA-BH-A0EE | MSS   | BRCA |
| TCGA-BH-A0EI | MSS   | BRCA |
| TCGA-BH-A0GY | MSS   | BRCA |
| TCGA-BH-A0GZ | MSS   | BRCA |
| TCGA-BH-A0H0 | MSS   | BRCA |
| TCGA-BH-A0H3 | MSS   | BRCA |
| TCGA-BH-A0H5 | MSS   | BRCA |
| TCGA-BH-A0H6 | MSS   | BRCA |
| TCGA-BH-A0H7 | MSS   | BRCA |
| TCGA-BH-A0H9 | MSS   | BRCA |
| TCGA-BH-A0HA | MSI-H | BRCA |
| TCGA-BH-A0HB | MSS   | BRCA |
| TCGA-BH-A0HF | MSS   | BRCA |
| TCGA-BH-A0HI | MSS   | BRCA |
| TCGA-BH-A0HK | MSS   | BRCA |
| TCGA-BH-A0HL | MSS   | BRCA |
| TCGA-BH-A0HN | MSS   | BRCA |
| TCGA-BH-A0HO | MSS   | BRCA |
| TCGA-BH-A0HP | MSS   | BRCA |
| TCGA-BH-A0HQ | MSS   | BRCA |
| TCGA-BH-A0HU | MSS   | BRCA |
| TCGA-BH-A0HW | MSS   | BRCA |
| TCGA-BH-A0HX | MSS   | BRCA |
| TCGA-BH-A0HY | MSS   | BRCA |
| TCGA-BH-A0RX | MSS   | BRCA |
| TCGA-BH-A0W3 | MSS   | BRCA |
| TCGA-BH-A0W4 | MSS   | BRCA |
| TCGA-BH-A0W5 | MSS   | BRCA |
| TCGA-BH-A0W7 | MSS   | BRCA |
| TCGA-BH-A0WA | MSS   | BRCA |
| TCGA-BH-A18F | MSS   | BRCA |
| TCGA-BH-A18G | MSI-H | BRCA |
| TCGA-BH-A18H | MSS   | BRCA |
| TCGA-BH-A18I | MSS   | BRCA |
| TCGA-BH-A18J | MSS   | BRCA |
| TCGA-BH-A18K | MSS   | BRCA |
| TCGA-BH-A18L | MSS   | BRCA |

|              |              |      |
|--------------|--------------|------|
| TCGA-BH-A18M | MSS          | BRCA |
| TCGA-BH-A18N | MSS          | BRCA |
| TCGA-BH-A18P | MSS          | BRCA |
| TCGA-BH-A18Q | MSS          | BRCA |
| TCGA-BH-A18R | MSS          | BRCA |
| TCGA-BH-A18S | MSS          | BRCA |
| TCGA-BH-A18T | MSS          | BRCA |
| TCGA-BH-A18U | MSS          | BRCA |
| TCGA-BH-A18V | MSS          | BRCA |
| TCGA-BH-A18V | MSS          | BRCA |
| TCGA-BH-A1EN | MSS          | BRCA |
| TCGA-BH-A1EO | MSS          | BRCA |
| TCGA-BH-A1ES | MSS          | BRCA |
| TCGA-BH-A1ES | Intermediate | BRCA |
| TCGA-BH-A1ET | MSS          | BRCA |
| TCGA-BH-A1EU | MSS          | BRCA |
| TCGA-BH-A1EV | MSS          | BRCA |
| TCGA-BH-A1EW | MSS          | BRCA |
| TCGA-BH-A1EX | MSS          | BRCA |
| TCGA-BH-A1EY | MSS          | BRCA |
| TCGA-BH-A1F0 | MSS          | BRCA |
| TCGA-BH-A1F2 | MSS          | BRCA |
| TCGA-BH-A1F5 | MSS          | BRCA |
| TCGA-BH-A1F6 | Intermediate | BRCA |
| TCGA-BH-A1F8 | MSS          | BRCA |
| TCGA-BH-A1FC | Intermediate | BRCA |
| TCGA-BH-A1FE | MSS          | BRCA |
| TCGA-BH-A1FE | MSS          | BRCA |
| TCGA-BH-A1FG | MSS          | BRCA |
| TCGA-BH-A1FH | MSS          | BRCA |
| TCGA-BH-A1FJ | MSI-H        | BRCA |
| TCGA-BH-A1FL | MSS          | BRCA |
| TCGA-BH-A1FM | MSI-H        | BRCA |
| TCGA-BH-A1FN | MSS          | BRCA |
| TCGA-BH-A1FR | MSS          | BRCA |
| TCGA-BH-A1FU | MSS          | BRCA |
| TCGA-BH-A201 | MSS          | BRCA |
| TCGA-BH-A202 | MSS          | BRCA |
| TCGA-BH-A203 | MSS          | BRCA |
| TCGA-BH-A204 | MSS          | BRCA |
| TCGA-BH-A208 | Intermediate | BRCA |
| TCGA-BH-A209 | MSS          | BRCA |
| TCGA-BH-A28O | MSS          | BRCA |
| TCGA-BH-A28Q | MSS          | BRCA |
| TCGA-BH-A2L8 | MSS          | BRCA |
| TCGA-BH-A5J0 | MSS          | BRCA |
| TCGA-BH-A6R8 | MSS          | BRCA |
| TCGA-BH-A6R9 | MSS          | BRCA |
| TCGA-BH-A8FY | MSS          | BRCA |
| TCGA-BH-A8FZ | MSS          | BRCA |
| TCGA-BH-A8G0 | MSS          | BRCA |
| TCGA-BH-AB28 | MSS          | BRCA |



|              |       |      |
|--------------|-------|------|
| TCGA-BI-A0VR | MSS   | CESC |
| TCGA-BI-A0VS | MSS   | CESC |
| TCGA-BJ-A0YZ | MSS   | THCA |
| TCGA-BJ-A0Z0 | MSS   | THCA |
| TCGA-BJ-A0Z2 | MSS   | THCA |
| TCGA-BJ-A0Z3 | MSS   | THCA |
| TCGA-BJ-A0Z9 | MSS   | THCA |
| TCGA-BJ-A0ZA | MSS   | THCA |
| TCGA-BJ-A0ZB | MSS   | THCA |
| TCGA-BJ-A0ZC | MSS   | THCA |
| TCGA-BJ-A0ZE | MSS   | THCA |
| TCGA-BJ-A0ZF | MSS   | THCA |
| TCGA-BJ-A0ZG | MSS   | THCA |
| TCGA-BJ-A0ZH | MSS   | THCA |
| TCGA-BJ-A0ZJ | MSS   | THCA |
| TCGA-BJ-A18Y | MSS   | THCA |
| TCGA-BJ-A18Z | MSS   | THCA |
| TCGA-BJ-A191 | MSS   | THCA |
| TCGA-BJ-A192 | MSS   | THCA |
| TCGA-BJ-A28R | MSS   | THCA |
| TCGA-BJ-A28S | MSS   | THCA |
| TCGA-BJ-A28T | MSS   | THCA |
| TCGA-BJ-A28V | MSS   | THCA |
| TCGA-BJ-A28Z | MSS   | THCA |
| TCGA-BJ-A290 | MSS   | THCA |
| TCGA-BJ-A2N7 | MSS   | THCA |
| TCGA-BJ-A2N8 | MSS   | THCA |
| TCGA-BJ-A2N9 | MSS   | THCA |
| TCGA-BJ-A2NA | MSS   | THCA |
| TCGA-BJ-A2P4 | MSS   | THCA |
| TCGA-BJ-A3EZ | MSS   | THCA |
| TCGA-BJ-A3F0 | MSS   | THCA |
| TCGA-BJ-A3PR | MSS   | THCA |
| TCGA-BJ-A3PT | MSS   | THCA |
| TCGA-BJ-A3PU | MSS   | THCA |
| TCGA-BJ-A45D | MSS   | THCA |
| TCGA-BJ-A45G | MSS   | THCA |
| TCGA-BJ-A45H | MSS   | THCA |
| TCGA-BJ-A45I | MSS   | THCA |
| TCGA-BJ-A45J | MSS   | THCA |
| TCGA-BJ-A408 | MSS   | THCA |
| TCGA-BK-A0C9 | MSI-H | UCEC |
| TCGA-BK-A0CA | MSS   | UCEC |
| TCGA-BK-A0CA | MSI-H | UCEC |
| TCGA-BK-A0CB | MSS   | UCEC |
| TCGA-BK-A0CC | MSS   | UCEC |
| TCGA-BK-A0CC | MSI-H | UCEC |
| TCGA-BK-A139 | MSI-H | UCEC |
| TCGA-BK-A139 | MSI-H | UCEC |
| TCGA-BK-A139 | MSI-H | UCEC |
| TCGA-BK-A13B | MSI-H | UCEC |
| TCGA-BK-A13C | MSS   | UCEC |

|              |              |      |
|--------------|--------------|------|
| TCGA-BK-A26L | MSS          | UCEC |
| TCGA-BK-A26L | MSI-H        | UCEC |
| TCGA-BK-A6W3 | MSS          | UCEC |
| TCGA-BK-A6W4 | MSS          | UCEC |
| TCGA-BL-A0C8 | MSS          | BLCA |
| TCGA-BL-A0C8 | Intermediate | BLCA |
| TCGA-BL-A13I | MSS          | BLCA |
| TCGA-BL-A13I | MSS          | BLCA |
| TCGA-BL-A13J | MSS          | BLCA |
| TCGA-BL-A13J | MSS          | BLCA |
| TCGA-BL-A5ZZ | MSS          | BLCA |
| TCGA-BM-6198 | MSS          | READ |
| TCGA-BP-4177 | MSS          | KIRC |
| TCGA-BP-4760 | MSS          | KIRC |
| TCGA-BP-4770 | MSS          | KIRC |
| TCGA-BP-4782 | MSS          | KIRC |
| TCGA-BP-4795 | MSS          | KIRC |
| TCGA-BP-4801 | MSS          | KIRC |
| TCGA-BP-4960 | MSS          | KIRC |
| TCGA-BP-4961 | MSS          | KIRC |
| TCGA-BP-4962 | MSS          | KIRC |
| TCGA-BP-4963 | MSS          | KIRC |
| TCGA-BP-4964 | MSS          | KIRC |
| TCGA-BP-4965 | MSS          | KIRC |
| TCGA-BP-4967 | MSS          | KIRC |
| TCGA-BP-4968 | MSS          | KIRC |
| TCGA-BP-4970 | MSS          | KIRC |
| TCGA-BP-4971 | MSS          | KIRC |
| TCGA-BP-4972 | MSS          | KIRC |
| TCGA-BP-4973 | MSS          | KIRC |
| TCGA-BP-4974 | MSS          | KIRC |
| TCGA-BP-4975 | MSS          | KIRC |
| TCGA-BP-4976 | MSS          | KIRC |
| TCGA-BP-4977 | Intermediate | KIRC |
| TCGA-BP-4981 | MSS          | KIRC |
| TCGA-BP-4982 | MSS          | KIRC |
| TCGA-BP-4983 | MSS          | KIRC |
| TCGA-BP-4985 | MSS          | KIRC |
| TCGA-BP-4986 | MSS          | KIRC |
| TCGA-BP-4987 | MSS          | KIRC |
| TCGA-BP-4988 | MSS          | KIRC |
| TCGA-BP-4989 | MSS          | KIRC |
| TCGA-BP-4991 | MSS          | KIRC |
| TCGA-BP-4992 | MSS          | KIRC |
| TCGA-BP-4993 | MSS          | KIRC |
| TCGA-BP-4995 | MSS          | KIRC |
| TCGA-BP-4998 | MSS          | KIRC |
| TCGA-BP-4999 | MSS          | KIRC |
| TCGA-BP-5000 | MSS          | KIRC |
| TCGA-BP-5001 | MSS          | KIRC |
| TCGA-BP-5004 | MSS          | KIRC |
| TCGA-BP-5006 | MSS          | KIRC |

|              |              |      |
|--------------|--------------|------|
| TCGA-BP-5007 | MSS          | KIRC |
| TCGA-BP-5008 | MSS          | KIRC |
| TCGA-BP-5009 | MSS          | KIRC |
| TCGA-BP-5010 | MSS          | KIRC |
| TCGA-BP-5168 | MSS          | KIRC |
| TCGA-BP-5169 | MSS          | KIRC |
| TCGA-BP-5170 | MSS          | KIRC |
| TCGA-BP-5173 | Intermediate | KIRC |
| TCGA-BP-5174 | MSS          | KIRC |
| TCGA-BP-5175 | MSS          | KIRC |
| TCGA-BP-5176 | Intermediate | KIRC |
| TCGA-BP-5177 | MSS          | KIRC |
| TCGA-BP-5178 | MSS          | KIRC |
| TCGA-BP-5180 | MSS          | KIRC |
| TCGA-BP-5181 | MSS          | KIRC |
| TCGA-BP-5182 | MSS          | KIRC |
| TCGA-BP-5183 | MSS          | KIRC |
| TCGA-BP-5184 | MSS          | KIRC |
| TCGA-BP-5185 | MSS          | KIRC |
| TCGA-BP-5186 | MSS          | KIRC |
| TCGA-BP-5187 | MSS          | KIRC |
| TCGA-BP-5189 | MSS          | KIRC |
| TCGA-BP-5190 | MSS          | KIRC |
| TCGA-BP-5191 | MSS          | KIRC |
| TCGA-BP-5192 | MSS          | KIRC |
| TCGA-BP-5194 | MSS          | KIRC |
| TCGA-BP-5195 | MSS          | KIRC |
| TCGA-BP-5196 | MSS          | KIRC |
| TCGA-BP-5198 | MSS          | KIRC |
| TCGA-BP-5199 | MSS          | KIRC |
| TCGA-BP-5200 | MSS          | KIRC |
| TCGA-BP-5201 | MSS          | KIRC |
| TCGA-BP-5202 | MSS          | KIRC |
| TCGA-BQ-5875 | MSS          | KIRP |
| TCGA-BQ-5876 | MSS          | KIRP |
| TCGA-BQ-5877 | MSS          | KIRP |
| TCGA-BQ-5878 | MSS          | KIRP |
| TCGA-BQ-5879 | MSS          | KIRP |
| TCGA-BQ-5880 | MSS          | KIRP |
| TCGA-BQ-5881 | MSS          | KIRP |
| TCGA-BQ-5882 | MSS          | KIRP |
| TCGA-BQ-5883 | MSS          | KIRP |
| TCGA-BQ-5884 | MSS          | KIRP |
| TCGA-BQ-5885 | MSS          | KIRP |
| TCGA-BQ-5886 | MSS          | KIRP |
| TCGA-BQ-5887 | MSS          | KIRP |
| TCGA-BQ-5888 | MSS          | KIRP |
| TCGA-BQ-5889 | MSS          | KIRP |
| TCGA-BQ-5890 | MSS          | KIRP |
| TCGA-BQ-5891 | MSS          | KIRP |
| TCGA-BQ-5892 | MSS          | KIRP |
| TCGA-BQ-5893 | MSS          | KIRP |

|              |       |      |
|--------------|-------|------|
| TCGA-BQ-5894 | MSS   | KIRP |
| TCGA-BQ-7044 | MSS   | KIRP |
| TCGA-BQ-7045 | MSS   | KIRP |
| TCGA-BQ-7046 | MSS   | KIRP |
| TCGA-BQ-7048 | MSS   | KIRP |
| TCGA-BQ-7049 | MSS   | KIRP |
| TCGA-BQ-7050 | MSS   | KIRP |
| TCGA-BQ-7051 | MSS   | KIRP |
| TCGA-BQ-7053 | MSS   | KIRP |
| TCGA-BQ-7055 | MSS   | KIRP |
| TCGA-BQ-7056 | MSS   | KIRP |
| TCGA-BQ-7058 | MSS   | KIRP |
| TCGA-BQ-7059 | MSS   | KIRP |
| TCGA-BQ-7060 | MSS   | KIRP |
| TCGA-BQ-7061 | MSS   | KIRP |
| TCGA-BQ-7062 | MSS   | KIRP |
| TCGA-BR-4183 | MSS   | STAD |
| TCGA-BR-4184 | MSI-H | STAD |
| TCGA-BR-4187 | MSS   | STAD |
| TCGA-BR-4188 | MSS   | STAD |
| TCGA-BR-4191 | MSS   | STAD |
| TCGA-BR-4201 | MSI-H | STAD |
| TCGA-BR-4253 | MSS   | STAD |
| TCGA-BR-4255 | MSS   | STAD |
| TCGA-BR-4256 | MSI-H | STAD |
| TCGA-BR-4257 | MSI-H | STAD |
| TCGA-BR-4267 | MSS   | STAD |
| TCGA-BR-4279 | MSS   | STAD |
| TCGA-BR-4280 | MSI-H | STAD |
| TCGA-BR-4292 | MSI-H | STAD |
| TCGA-BR-4294 | MSS   | STAD |
| TCGA-BR-4357 | MSS   | STAD |
| TCGA-BR-4361 | MSI-H | STAD |
| TCGA-BR-4362 | MSI-H | STAD |
| TCGA-BR-4363 | MSI-H | STAD |
| TCGA-BR-4366 | MSS   | STAD |
| TCGA-BR-4368 | MSI-H | STAD |
| TCGA-BR-4369 | MSS   | STAD |
| TCGA-BR-4370 | MSI-H | STAD |
| TCGA-BR-4371 | MSS   | STAD |
| TCGA-BR-6452 | MSI-H | STAD |
| TCGA-BR-6453 | MSS   | STAD |
| TCGA-BR-6454 | MSS   | STAD |
| TCGA-BR-6455 | MSS   | STAD |
| TCGA-BR-6456 | MSS   | STAD |
| TCGA-BR-6457 | MSS   | STAD |
| TCGA-BR-6458 | MSS   | STAD |
| TCGA-BR-6563 | MSS   | STAD |
| TCGA-BR-6564 | MSS   | STAD |
| TCGA-BR-6565 | MSS   | STAD |
| TCGA-BR-6566 | MSI-H | STAD |
| TCGA-BR-6705 | MSS   | STAD |

|              |       |      |
|--------------|-------|------|
| TCGA-BR-6706 | MSS   | STAD |
| TCGA-BR-6707 | MSS   | STAD |
| TCGA-BR-6709 | MSS   | STAD |
| TCGA-BR-6710 | MSS   | STAD |
| TCGA-BR-6801 | MSS   | STAD |
| TCGA-BR-6802 | MSI-H | STAD |
| TCGA-BR-6803 | MSS   | STAD |
| TCGA-BR-6852 | MSI-H | STAD |
| TCGA-BR-7196 | MSS   | STAD |
| TCGA-BR-7197 | MSI-H | STAD |
| TCGA-BR-7703 | MSI-H | STAD |
| TCGA-BR-7704 | MSS   | STAD |
| TCGA-BR-7707 | MSI-H | STAD |
| TCGA-BR-7722 | MSS   | STAD |
| TCGA-BR-7851 | MSI-H | STAD |
| TCGA-BR-7901 | MSS   | STAD |
| TCGA-BR-7958 | MSS   | STAD |
| TCGA-BR-7959 | MSS   | STAD |
| TCGA-BR-8059 | MSI-H | STAD |
| TCGA-BR-8060 | MSS   | STAD |
| TCGA-BR-8077 | MSS   | STAD |
| TCGA-BR-8078 | MSI-H | STAD |
| TCGA-BR-8080 | MSS   | STAD |
| TCGA-BR-8081 | MSI-H | STAD |
| TCGA-BR-8284 | MSI-H | STAD |
| TCGA-BR-8285 | MSS   | STAD |
| TCGA-BR-8286 | MSS   | STAD |
| TCGA-BR-8289 | MSS   | STAD |
| TCGA-BR-8295 | MSS   | STAD |
| TCGA-BR-8296 | MSS   | STAD |
| TCGA-BR-8360 | MSI-H | STAD |
| TCGA-BR-8361 | MSI-H | STAD |
| TCGA-BR-8362 | MSS   | STAD |
| TCGA-BR-8363 | MSI-H | STAD |
| TCGA-BR-8365 | MSS   | STAD |
| TCGA-BR-8366 | MSS   | STAD |
| TCGA-BR-8367 | MSS   | STAD |
| TCGA-BR-8368 | MSI-H | STAD |
| TCGA-BR-8369 | MSS   | STAD |
| TCGA-BR-8370 | MSS   | STAD |
| TCGA-BR-8371 | MSS   | STAD |
| TCGA-BR-8372 | MSI-H | STAD |
| TCGA-BR-8373 | MSS   | STAD |
| TCGA-BR-8381 | MSS   | STAD |
| TCGA-BR-8382 | MSI-H | STAD |
| TCGA-BR-8384 | MSS   | STAD |
| TCGA-BR-8483 | MSS   | STAD |
| TCGA-BR-8484 | MSS   | STAD |
| TCGA-BR-8485 | MSS   | STAD |
| TCGA-BR-8486 | MSS   | STAD |
| TCGA-BR-8487 | MSI-H | STAD |
| TCGA-BR-8588 | MSS   | STAD |

|              |              |      |
|--------------|--------------|------|
| TCGA-BR-8589 | MSS          | STAD |
| TCGA-BR-8590 | MSS          | STAD |
| TCGA-BR-8591 | MSI-H        | STAD |
| TCGA-BR-8676 | MSS          | STAD |
| TCGA-BR-8677 | MSS          | STAD |
| TCGA-BR-8678 | MSS          | STAD |
| TCGA-BR-8679 | MSS          | STAD |
| TCGA-BR-8680 | MSS          | STAD |
| TCGA-BR-8682 | MSS          | STAD |
| TCGA-BR-8683 | MSS          | STAD |
| TCGA-BR-8687 | MSS          | STAD |
| TCGA-BR-8690 | MSS          | STAD |
| TCGA-BR-A44T | MSS          | STAD |
| TCGA-BR-A44U | MSS          | STAD |
| TCGA-BR-A452 | MSS          | STAD |
| TCGA-BR-A453 | MSS          | STAD |
| TCGA-BR-A4CQ | MSS          | STAD |
| TCGA-BR-A4CR | MSS          | STAD |
| TCGA-BR-A4CS | MSS          | STAD |
| TCGA-BR-A4IV | MSS          | STAD |
| TCGA-BR-A4IY | MSS          | STAD |
| TCGA-BR-A4IZ | MSS          | STAD |
| TCGA-BR-A4J1 | MSS          | STAD |
| TCGA-BR-A4J2 | MSS          | STAD |
| TCGA-BR-A4J4 | MSS          | STAD |
| TCGA-BR-A4J5 | MSS          | STAD |
| TCGA-BR-A4J6 | MSS          | STAD |
| TCGA-BR-A4J7 | MSS          | STAD |
| TCGA-BR-A4J8 | MSS          | STAD |
| TCGA-BR-A4J9 | MSS          | STAD |
| TCGA-BR-A4PD | MSS          | STAD |
| TCGA-BR-A4PE | MSS          | STAD |
| TCGA-BR-A4PF | MSS          | STAD |
| TCGA-BR-A4QI | MSS          | STAD |
| TCGA-BR-A4QL | MSI-H        | STAD |
| TCGA-BS-A0T9 | MSS          | UCEC |
| TCGA-BS-A0TA | MSI-H        | UCEC |
| TCGA-BS-A0TC | Intermediate | UCEC |
| TCGA-BS-A0TD | MSS          | UCEC |
| TCGA-BS-A0TE | MSI-H        | UCEC |
| TCGA-BS-A0TG | MSS          | UCEC |
| TCGA-BS-A0TI | MSS          | UCEC |
| TCGA-BS-A0TJ | MSI-H        | UCEC |
| TCGA-BS-A0U5 | MSS          | UCEC |
| TCGA-BS-A0U7 | MSI-H        | UCEC |
| TCGA-BS-A0U8 | MSI-H        | UCEC |
| TCGA-BS-A0UA | MSI-H        | UCEC |
| TCGA-BS-A0UF | Intermediate | UCEC |
| TCGA-BS-A0UJ | MSI-H        | UCEC |
| TCGA-BS-A0UL | MSI-H        | UCEC |
| TCGA-BS-A0UM | MSI-H        | UCEC |
| TCGA-BS-A0UT | MSS          | UCEC |

|              |              |      |
|--------------|--------------|------|
| TCGA-BS-A0UV | Intermediate | UCEC |
| TCGA-BS-A0V6 | MSS          | UCEC |
| TCGA-BS-A0V7 | MSS          | UCEC |
| TCGA-BS-A0V8 | MSS          | UCEC |
| TCGA-BS-A0VI | MSI-H        | UCEC |
| TCGA-BS-A0WQ | MSS          | UCEC |
| TCGA-BT-A0S7 | MSS          | BLCA |
| TCGA-BT-A0YX | MSS          | BLCA |
| TCGA-BT-A20J | MSS          | BLCA |
| TCGA-BT-A20N | MSS          | BLCA |
| TCGA-BT-A20O | MSS          | BLCA |
| TCGA-BT-A20P | MSS          | BLCA |
| TCGA-BT-A20Q | MSS          | BLCA |
| TCGA-BT-A20R | MSS          | BLCA |
| TCGA-BT-A20T | MSS          | BLCA |
| TCGA-BT-A20U | MSS          | BLCA |
| TCGA-BT-A20V | MSS          | BLCA |
| TCGA-BT-A20W | MSS          | BLCA |
| TCGA-BT-A20X | MSS          | BLCA |
| TCGA-BT-A2LA | MSS          | BLCA |
| TCGA-BT-A2LB | MSS          | BLCA |
| TCGA-BT-A2LD | MSS          | BLCA |
| TCGA-BT-A3PH | MSS          | BLCA |
| TCGA-BT-A3PJ | MSS          | BLCA |
| TCGA-BT-A3PK | MSS          | BLCA |
| TCGA-BT-A42B | MSS          | BLCA |
| TCGA-BT-A42C | MSS          | BLCA |
| TCGA-BT-A42E | MSS          | BLCA |
| TCGA-BT-A42F | MSS          | BLCA |
| TCGA-C4-A0EZ | MSS          | BLCA |
| TCGA-C4-A0F0 | MSS          | BLCA |
| TCGA-C4-A0F1 | MSS          | BLCA |
| TCGA-C4-A0F6 | MSS          | BLCA |
| TCGA-C4-A0F7 | MSS          | BLCA |
| TCGA-C5-A0TN | MSS          | CESC |
| TCGA-C5-A1BE | MSS          | CESC |
| TCGA-C5-A1BF | MSS          | CESC |
| TCGA-C5-A1BI | MSS          | CESC |
| TCGA-C5-A1BJ | MSS          | CESC |
| TCGA-C5-A1BK | MSS          | CESC |
| TCGA-C5-A1BL | MSS          | CESC |
| TCGA-C5-A1BM | MSS          | CESC |
| TCGA-C5-A1BN | MSS          | CESC |
| TCGA-C5-A1BQ | MSS          | CESC |
| TCGA-C5-A1M5 | MSS          | CESC |
| TCGA-C5-A1M6 | MSS          | CESC |
| TCGA-C5-A1M7 | MSS          | CESC |
| TCGA-C5-A1M8 | MSS          | CESC |
| TCGA-C5-A1M9 | MSS          | CESC |
| TCGA-C5-A1ME | MSS          | CESC |
| TCGA-C5-A1MF | MSS          | CESC |
| TCGA-C5-A1MH | MSS          | CESC |

|              |     |      |
|--------------|-----|------|
| TCGA-C5-A1MI | MSS | CEC  |
| TCGA-C5-A1MJ | MSS | CEC  |
| TCGA-C5-A1MK | MSS | CEC  |
| TCGA-C5-A1ML | MSS | CEC  |
| TCGA-C5-A1MN | MSS | CEC  |
| TCGA-C5-A1MP | MSS | CEC  |
| TCGA-C5-A1MQ | MSS | CEC  |
| TCGA-C5-A2LS | MSS | CEC  |
| TCGA-C5-A2LZ | MSS | CEC  |
| TCGA-C5-A3HD | MSS | CEC  |
| TCGA-C5-A3HE | MSS | CEC  |
| TCGA-C5-A3HF | MSS | CEC  |
| TCGA-C5-A3HL | MSS | CEC  |
| TCGA-C5-A7CG | MSS | CEC  |
| TCGA-C5-A7CH | MSS | CEC  |
| TCGA-C5-A7CJ | MSS | CEC  |
| TCGA-C5-A7CK | MSS | CEC  |
| TCGA-C5-A7CL | MSS | CEC  |
| TCGA-C5-A7CM | MSS | CEC  |
| TCGA-C5-A7CO | MSS | CEC  |
| TCGA-C5-A7UC | MSS | CEC  |
| TCGA-C5-A7UE | MSS | CEC  |
| TCGA-C5-A7UH | MSS | CEC  |
| TCGA-C5-A7UI | MSS | CEC  |
| TCGA-C5-A7X3 | MSS | CEC  |
| TCGA-C5-A7X5 | MSS | CEC  |
| TCGA-C5-A7X8 | MSS | CEC  |
| TCGA-C5-A8XH | MSS | CEC  |
| TCGA-C5-A8XI | MSS | CEC  |
| TCGA-C5-A8XJ | MSS | CEC  |
| TCGA-C5-A8XK | MSS | CEC  |
| TCGA-C5-A8YQ | MSS | CEC  |
| TCGA-C5-A8YR | MSS | CEC  |
| TCGA-C5-A8YT | MSS | CEC  |
| TCGA-C5-A8ZZ | MSS | CEC  |
| TCGA-C5-A901 | MSS | CEC  |
| TCGA-C5-A902 | MSS | CEC  |
| TCGA-C5-A905 | MSS | CEC  |
| TCGA-C5-A907 | MSS | CEC  |
| TCGA-C8-A12K | MSS | BRCA |
| TCGA-C8-A12L | MSS | BRCA |
| TCGA-C8-A12M | MSS | BRCA |
| TCGA-C8-A12N | MSS | BRCA |
| TCGA-C8-A12O | MSS | BRCA |
| TCGA-C8-A12P | MSS | BRCA |
| TCGA-C8-A12Q | MSS | BRCA |
| TCGA-C8-A12T | MSS | BRCA |
| TCGA-C8-A12U | MSS | BRCA |
| TCGA-C8-A12V | MSS | BRCA |
| TCGA-C8-A12W | MSS | BRCA |
| TCGA-C8-A12X | MSS | BRCA |
| TCGA-C8-A12Y | MSS | BRCA |



|              |              |      |
|--------------|--------------|------|
| TCGA-C8-A12Z | MSS          | BRCA |
| TCGA-C8-A130 | MSS          | BRCA |
| TCGA-C8-A131 | MSS          | BRCA |
| TCGA-C8-A132 | MSS          | BRCA |
| TCGA-C8-A133 | MSS          | BRCA |
| TCGA-C8-A134 | MSS          | BRCA |
| TCGA-C8-A135 | MSS          | BRCA |
| TCGA-C8-A137 | MSS          | BRCA |
| TCGA-C8-A138 | MSS          | BRCA |
| TCGA-C8-A1HE | Intermediate | BRCA |
| TCGA-C8-A1HF | MSS          | BRCA |
| TCGA-C8-A1HG | MSS          | BRCA |
| TCGA-C8-A1HJ | MSI-H        | BRCA |
| TCGA-C8-A1HK | Intermediate | BRCA |
| TCGA-C8-A1HL | MSS          | BRCA |
| TCGA-C8-A1HM | MSS          | BRCA |
| TCGA-C8-A1HN | MSS          | BRCA |
| TCGA-C8-A1HO | Intermediate | BRCA |
| TCGA-C8-A26V | MSS          | BRCA |
| TCGA-C8-A26W | MSS          | BRCA |
| TCGA-C8-A26X | MSS          | BRCA |
| TCGA-C8-A26Y | MSS          | BRCA |
| TCGA-C8-A26Z | MSS          | BRCA |
| TCGA-C8-A273 | MSS          | BRCA |
| TCGA-C8-A274 | MSS          | BRCA |
| TCGA-C8-A275 | MSS          | BRCA |
| TCGA-C8-A278 | MSS          | BRCA |
| TCGA-C8-A27A | MSS          | BRCA |
| TCGA-C8-A27B | MSI-H        | BRCA |
| TCGA-C8-A8HP | MSS          | BRCA |
| TCGA-C8-A8HQ | MSS          | BRCA |
| TCGA-C8-A8HR | MSS          | BRCA |
| TCGA-C8-A9FZ | MSS          | BRCA |
| TCGA-C9-A47Z | MSS          | HNSC |
| TCGA-C9-A480 | MSS          | HNSC |
| TCGA-CA-5254 | MSS          | COAD |
| TCGA-CA-5255 | MSS          | COAD |
| TCGA-CA-5256 | MSS          | COAD |
| TCGA-CA-5796 | MSS          | COAD |
| TCGA-CA-5797 | MSS          | COAD |
| TCGA-CA-6715 | MSS          | COAD |
| TCGA-CA-6716 | MSS          | COAD |
| TCGA-CA-6717 | MSS          | COAD |
| TCGA-CA-6718 | MSS          | COAD |
| TCGA-CA-6719 | MSS          | COAD |
| TCGA-CC-5258 | MSS          | LIHC |
| TCGA-CC-5259 | MSS          | LIHC |
| TCGA-CC-5260 | MSS          | LIHC |
| TCGA-CC-5261 | MSS          | LIHC |
| TCGA-CC-5262 | MSS          | LIHC |
| TCGA-CC-5263 | MSS          | LIHC |
| TCGA-CC-5264 | MSS          | LIHC |

|              |              |      |
|--------------|--------------|------|
| TCGA-CC-A123 | MSS          | LIHC |
| TCGA-CC-A1HT | MSS          | LIHC |
| TCGA-CC-A3M9 | MSS          | LIHC |
| TCGA-CC-A3MA | MSS          | LIHC |
| TCGA-CC-A3MC | MSS          | LIHC |
| TCGA-CC-A7IE | MSS          | LIHC |
| TCGA-CC-A7IF | MSS          | LIHC |
| TCGA-CC-A7IG | MSS          | LIHC |
| TCGA-CC-A7IH | MSS          | LIHC |
| TCGA-CC-A7II | MSS          | LIHC |
| TCGA-CC-A7IJ | MSS          | LIHC |
| TCGA-CC-A7IK | MSS          | LIHC |
| TCGA-CC-A7IL | MSS          | LIHC |
| TCGA-CC-A8HS | MSS          | LIHC |
| TCGA-CC-A8HT | MSS          | LIHC |
| TCGA-CC-A8HU | MSS          | LIHC |
| TCGA-CC-A8HV | MSS          | LIHC |
| TCGA-CC-A9FS | MSS          | LIHC |
| TCGA-CC-A9FU | MSS          | LIHC |
| TCGA-CC-A9FV | MSS          | LIHC |
| TCGA-CC-A9FW | MSS          | LIHC |
| TCGA-CD-5798 | MSS          | STAD |
| TCGA-CD-5799 | MSS          | STAD |
| TCGA-CD-5800 | MSS          | STAD |
| TCGA-CD-5801 | MSS          | STAD |
| TCGA-CD-5802 | MSS          | STAD |
| TCGA-CD-5803 | MSS          | STAD |
| TCGA-CD-5813 | MSS          | STAD |
| TCGA-CD-8524 | MSS          | STAD |
| TCGA-CD-8525 | MSS          | STAD |
| TCGA-CD-8526 | MSS          | STAD |
| TCGA-CD-8527 | Intermediate | STAD |
| TCGA-CD-8528 | MSS          | STAD |
| TCGA-CD-8529 | MSS          | STAD |
| TCGA-CD-8530 | MSS          | STAD |
| TCGA-CD-8531 | MSS          | STAD |
| TCGA-CD-8532 | MSS          | STAD |
| TCGA-CD-8534 | MSS          | STAD |
| TCGA-CD-8535 | MSS          | STAD |
| TCGA-CD-8536 | MSI-H        | STAD |
| TCGA-CD-A486 | MSS          | STAD |
| TCGA-CD-A487 | MSS          | STAD |
| TCGA-CD-A489 | MSS          | STAD |
| TCGA-CD-A48A | MSS          | STAD |
| TCGA-CD-A48C | MSS          | STAD |
| TCGA-CD-A4MG | MSI-H        | STAD |
| TCGA-CD-A4MH | MSS          | STAD |
| TCGA-CD-A4MI | MSI-H        | STAD |
| TCGA-CD-A4MJ | MSI-H        | STAD |
| TCGA-CE-A13K | MSS          | THCA |
| TCGA-CE-A27D | MSS          | THCA |
| TCGA-CE-A3MD | MSS          | THCA |

|              |              |      |
|--------------|--------------|------|
| TCGA-CE-A3ME | MSS          | THCA |
| TCGA-CE-A482 | MSS          | THCA |
| TCGA-CE-A483 | MSS          | THCA |
| TCGA-CE-A484 | MSS          | THCA |
| TCGA-CF-A1HR | MSS          | BLCA |
| TCGA-CF-A1HS | MSS          | BLCA |
| TCGA-CF-A27C | MSS          | BLCA |
| TCGA-CF-A3MH | MSS          | BLCA |
| TCGA-CF-A47S | MSS          | BLCA |
| TCGA-CF-A47T | MSS          | BLCA |
| TCGA-CF-A47V | MSS          | BLCA |
| TCGA-CF-A47W | MSS          | BLCA |
| TCGA-CF-A47X | MSS          | BLCA |
| TCGA-CF-A47Y | MSS          | BLCA |
| TCGA-CF-A5U8 | MSS          | BLCA |
| TCGA-CF-A5UA | MSS          | BLCA |
| TCGA-CF-A7I0 | MSS          | BLCA |
| TCGA-CF-A8HX | MSS          | BLCA |
| TCGA-CF-A8HY | MSS          | BLCA |
| TCGA-CF-A9FF | MSS          | BLCA |
| TCGA-CF-A9FH | MSS          | BLCA |
| TCGA-CF-A9FL | MSS          | BLCA |
| TCGA-CF-A9FM | MSS          | BLCA |
| TCGA-CG-4300 | MSS          | STAD |
| TCGA-CG-4301 | MSS          | STAD |
| TCGA-CG-4304 | MSS          | STAD |
| TCGA-CG-4305 | MSI-H        | STAD |
| TCGA-CG-4306 | MSI-H        | STAD |
| TCGA-CG-4436 | MSS          | STAD |
| TCGA-CG-4437 | MSS          | STAD |
| TCGA-CG-4438 | MSS          | STAD |
| TCGA-CG-4440 | MSS          | STAD |
| TCGA-CG-4441 | MSS          | STAD |
| TCGA-CG-4442 | MSI-H        | STAD |
| TCGA-CG-4443 | MSS          | STAD |
| TCGA-CG-4444 | MSS          | STAD |
| TCGA-CG-4449 | MSS          | STAD |
| TCGA-CG-4455 | MSS          | STAD |
| TCGA-CG-4460 | MSI-H        | STAD |
| TCGA-CG-4462 | MSS          | STAD |
| TCGA-CG-4465 | MSI-H        | STAD |
| TCGA-CG-4466 | MSS          | STAD |
| TCGA-CG-4469 | MSS          | STAD |
| TCGA-CG-4474 | Intermediate | STAD |
| TCGA-CG-4475 | MSS          | STAD |
| TCGA-CG-4476 | MSS          | STAD |
| TCGA-CG-4477 | MSS          | STAD |
| TCGA-CG-5716 | MSS          | STAD |
| TCGA-CG-5717 | MSS          | STAD |
| TCGA-CG-5718 | MSS          | STAD |
| TCGA-CG-5719 | MSS          | STAD |
| TCGA-CG-5720 | MSS          | STAD |

|              |       |      |
|--------------|-------|------|
| TCGA-CG-5721 | MSI-H | STAD |
| TCGA-CG-5722 | MSS   | STAD |
| TCGA-CG-5723 | MSI-H | STAD |
| TCGA-CG-5724 | MSS   | STAD |
| TCGA-CG-5725 | MSS   | STAD |
| TCGA-CG-5726 | MSI-H | STAD |
| TCGA-CG-5727 | MSS   | STAD |
| TCGA-CG-5728 | MSI-H | STAD |
| TCGA-CG-5730 | MSS   | STAD |
| TCGA-CG-5732 | MSS   | STAD |
| TCGA-CG-5733 | MSI-H | STAD |
| TCGA-CG-5734 | MSS   | STAD |
| TCGA-CH-5737 | MSS   | PRAD |
| TCGA-CH-5738 | MSS   | PRAD |
| TCGA-CH-5739 | MSS   | PRAD |
| TCGA-CH-5740 | MSS   | PRAD |
| TCGA-CH-5741 | MSS   | PRAD |
| TCGA-CH-5743 | MSS   | PRAD |
| TCGA-CH-5744 | MSS   | PRAD |
| TCGA-CH-5745 | MSS   | PRAD |
| TCGA-CH-5746 | MSS   | PRAD |
| TCGA-CH-5748 | MSS   | PRAD |
| TCGA-CH-5750 | MSS   | PRAD |
| TCGA-CH-5751 | MSS   | PRAD |
| TCGA-CH-5752 | MSS   | PRAD |
| TCGA-CH-5753 | MSS   | PRAD |
| TCGA-CH-5754 | MSS   | PRAD |
| TCGA-CH-5761 | MSS   | PRAD |
| TCGA-CH-5762 | MSS   | PRAD |
| TCGA-CH-5763 | MSS   | PRAD |
| TCGA-CH-5764 | MSS   | PRAD |
| TCGA-CH-5765 | MSS   | PRAD |
| TCGA-CH-5766 | MSS   | PRAD |
| TCGA-CH-5767 | MSS   | PRAD |
| TCGA-CH-5768 | MSS   | PRAD |
| TCGA-CH-5769 | MSS   | PRAD |
| TCGA-CH-5771 | MSS   | PRAD |
| TCGA-CH-5772 | MSS   | PRAD |
| TCGA-CH-5788 | MSS   | PRAD |
| TCGA-CH-5789 | MSS   | PRAD |
| TCGA-CH-5790 | MSS   | PRAD |
| TCGA-CH-5791 | MSS   | PRAD |
| TCGA-CH-5792 | MSS   | PRAD |
| TCGA-CH-5794 | MSS   | PRAD |
| TCGA-CI-6619 | MSS   | READ |
| TCGA-CI-6620 | MSS   | READ |
| TCGA-CI-6621 | MSS   | READ |
| TCGA-CI-6622 | MSS   | READ |
| TCGA-CI-6623 | MSS   | READ |
| TCGA-CI-6624 | MSS   | READ |
| TCGA-CJ-4869 | MSS   | KIRC |
| TCGA-CJ-4882 | MSS   | KIRC |

|              |       |      |
|--------------|-------|------|
| TCGA-CJ-4899 | MSS   | KIRC |
| TCGA-CJ-4900 | MSS   | KIRC |
| TCGA-CJ-4901 | MSS   | KIRC |
| TCGA-CJ-4902 | MSS   | KIRC |
| TCGA-CJ-4903 | MSS   | KIRC |
| TCGA-CJ-4904 | MSS   | KIRC |
| TCGA-CJ-4905 | MSS   | KIRC |
| TCGA-CJ-4907 | MSS   | KIRC |
| TCGA-CJ-4908 | MSS   | KIRC |
| TCGA-CJ-4912 | MSS   | KIRC |
| TCGA-CJ-4913 | MSS   | KIRC |
| TCGA-CJ-4916 | MSS   | KIRC |
| TCGA-CJ-4918 | MSS   | KIRC |
| TCGA-CJ-4920 | MSS   | KIRC |
| TCGA-CJ-4923 | MSS   | KIRC |
| TCGA-CJ-5671 | MSS   | KIRC |
| TCGA-CJ-5672 | MSS   | KIRC |
| TCGA-CJ-5675 | MSS   | KIRC |
| TCGA-CJ-5676 | MSS   | KIRC |
| TCGA-CJ-5677 | MSS   | KIRC |
| TCGA-CJ-5678 | MSS   | KIRC |
| TCGA-CJ-5679 | MSS   | KIRC |
| TCGA-CJ-5680 | MSS   | KIRC |
| TCGA-CJ-5681 | MSS   | KIRC |
| TCGA-CJ-5682 | MSS   | KIRC |
| TCGA-CJ-5683 | MSS   | KIRC |
| TCGA-CJ-5684 | MSS   | KIRC |
| TCGA-CJ-5686 | MSS   | KIRC |
| TCGA-CJ-5689 | MSS   | KIRC |
| TCGA-CJ-6027 | MSS   | KIRC |
| TCGA-CJ-6028 | MSS   | KIRC |
| TCGA-CJ-6030 | MSS   | KIRC |
| TCGA-CJ-6031 | MSS   | KIRC |
| TCGA-CJ-6032 | MSS   | KIRC |
| TCGA-CJ-6033 | MSS   | KIRC |
| TCGA-CK-4947 | MSS   | COAD |
| TCGA-CK-4948 | MSS   | COAD |
| TCGA-CK-4950 | MSS   | COAD |
| TCGA-CK-4951 | MSI-H | COAD |
| TCGA-CK-4952 | MSS   | COAD |
| TCGA-CK-5912 | MSS   | COAD |
| TCGA-CK-5913 | MSI-H | COAD |
| TCGA-CK-5914 | MSS   | COAD |
| TCGA-CK-5915 | MSS   | COAD |
| TCGA-CK-5916 | MSI-H | COAD |
| TCGA-CK-6746 | MSI-H | COAD |
| TCGA-CK-6747 | MSS   | COAD |
| TCGA-CK-6748 | MSS   | COAD |
| TCGA-CK-6751 | MSS   | COAD |
| TCGA-CL-4957 | MSS   | READ |
| TCGA-CL-5917 | MSS   | READ |
| TCGA-CL-5918 | MSS   | READ |

|              |       |      |
|--------------|-------|------|
| TCGA-CM-4743 | MSI-H | COAD |
| TCGA-CM-4744 | MSS   | COAD |
| TCGA-CM-4746 | MSI-H | COAD |
| TCGA-CM-4747 | MSS   | COAD |
| TCGA-CM-4748 | MSS   | COAD |
| TCGA-CM-4750 | MSS   | COAD |
| TCGA-CM-4751 | MSS   | COAD |
| TCGA-CM-4752 | MSS   | COAD |
| TCGA-CM-5341 | MSS   | COAD |
| TCGA-CM-5344 | MSS   | COAD |
| TCGA-CM-5348 | MSS   | COAD |
| TCGA-CM-5349 | MSS   | COAD |
| TCGA-CM-5860 | MSS   | COAD |
| TCGA-CM-5861 | MSI-H | COAD |
| TCGA-CM-5862 | MSS   | COAD |
| TCGA-CM-5863 | MSS   | COAD |
| TCGA-CM-5864 | MSS   | COAD |
| TCGA-CM-6161 | MSS   | COAD |
| TCGA-CM-6162 | MSI-H | COAD |
| TCGA-CM-6163 | MSS   | COAD |
| TCGA-CM-6164 | MSS   | COAD |
| TCGA-CM-6165 | MSS   | COAD |
| TCGA-CM-6166 | MSS   | COAD |
| TCGA-CM-6167 | MSS   | COAD |
| TCGA-CM-6168 | MSS   | COAD |
| TCGA-CM-6169 | MSS   | COAD |
| TCGA-CM-6170 | MSS   | COAD |
| TCGA-CM-6171 | MSI-H | COAD |
| TCGA-CM-6172 | MSS   | COAD |
| TCGA-CM-6674 | MSI-H | COAD |
| TCGA-CM-6675 | MSS   | COAD |
| TCGA-CM-6676 | MSS   | COAD |
| TCGA-CM-6677 | MSS   | COAD |
| TCGA-CM-6678 | MSS   | COAD |
| TCGA-CN-4723 | MSS   | HNSC |
| TCGA-CN-4725 | MSS   | HNSC |
| TCGA-CN-4726 | MSS   | HNSC |
| TCGA-CN-4727 | MSS   | HNSC |
| TCGA-CN-4728 | MSS   | HNSC |
| TCGA-CN-4729 | MSS   | HNSC |
| TCGA-CN-4730 | MSS   | HNSC |
| TCGA-CN-4731 | MSS   | HNSC |
| TCGA-CN-4733 | MSS   | HNSC |
| TCGA-CN-4734 | MSS   | HNSC |
| TCGA-CN-4735 | MSS   | HNSC |
| TCGA-CN-4736 | MSS   | HNSC |
| TCGA-CN-4737 | MSS   | HNSC |
| TCGA-CN-4738 | MSS   | HNSC |
| TCGA-CN-4739 | MSS   | HNSC |
| TCGA-CN-4740 | MSS   | HNSC |
| TCGA-CN-4741 | MSS   | HNSC |
| TCGA-CN-4742 | MSS   | HNSC |

|              |              |      |
|--------------|--------------|------|
| TCGA-CN-5355 | MSS          | HNSC |
| TCGA-CN-5356 | MSS          | HNSC |
| TCGA-CN-5358 | MSS          | HNSC |
| TCGA-CN-5359 | MSS          | HNSC |
| TCGA-CN-5360 | MSS          | HNSC |
| TCGA-CN-5361 | MSS          | HNSC |
| TCGA-CN-5363 | MSS          | HNSC |
| TCGA-CN-5364 | MSS          | HNSC |
| TCGA-CN-5365 | Intermediate | HNSC |
| TCGA-CN-5366 | MSS          | HNSC |
| TCGA-CN-5367 | MSS          | HNSC |
| TCGA-CN-5369 | MSI-H        | HNSC |
| TCGA-CN-5370 | MSS          | HNSC |
| TCGA-CN-5373 | MSS          | HNSC |
| TCGA-CN-5374 | MSS          | HNSC |
| TCGA-CN-6010 | MSS          | HNSC |
| TCGA-CN-6011 | MSS          | HNSC |
| TCGA-CN-6012 | MSS          | HNSC |
| TCGA-CN-6013 | MSS          | HNSC |
| TCGA-CN-6016 | MSS          | HNSC |
| TCGA-CN-6017 | MSS          | HNSC |
| TCGA-CN-6018 | MSS          | HNSC |
| TCGA-CN-6019 | MSS          | HNSC |
| TCGA-CN-6020 | MSS          | HNSC |
| TCGA-CN-6021 | MSS          | HNSC |
| TCGA-CN-6022 | MSS          | HNSC |
| TCGA-CN-6023 | MSS          | HNSC |
| TCGA-CN-6024 | MSS          | HNSC |
| TCGA-CN-6988 | MSS          | HNSC |
| TCGA-CN-6989 | MSS          | HNSC |
| TCGA-CN-6992 | MSS          | HNSC |
| TCGA-CN-6994 | MSS          | HNSC |
| TCGA-CN-6995 | MSS          | HNSC |
| TCGA-CN-6996 | MSS          | HNSC |
| TCGA-CN-6997 | MSS          | HNSC |
| TCGA-CN-6998 | MSS          | HNSC |
| TCGA-CN-A497 | MSS          | HNSC |
| TCGA-CN-A498 | MSS          | HNSC |
| TCGA-CN-A499 | MSS          | HNSC |
| TCGA-CN-A49A | MSS          | HNSC |
| TCGA-CN-A49B | MSS          | HNSC |
| TCGA-CN-A49C | MSS          | HNSC |
| TCGA-CN-A63T | MSS          | HNSC |
| TCGA-CN-A63U | MSS          | HNSC |
| TCGA-CN-A63V | MSS          | HNSC |
| TCGA-CN-A63W | MSS          | HNSC |
| TCGA-CN-A63Y | MSS          | HNSC |
| TCGA-CN-A640 | MSS          | HNSC |
| TCGA-CN-A641 | MSS          | HNSC |
| TCGA-CN-A642 | MSS          | HNSC |
| TCGA-CN-A6UY | MSS          | HNSC |
| TCGA-CN-A6V1 | MSS          | HNSC |

|              |     |      |
|--------------|-----|------|
| TCGA-CN-A6V3 | MSS | HNSC |
| TCGA-CN-A6V6 | MSS | HNSC |
| TCGA-CN-A6V7 | MSS | HNSC |
| TCGA-CQ-5323 | MSS | HNSC |
| TCGA-CQ-5324 | MSS | HNSC |
| TCGA-CQ-5325 | MSS | HNSC |
| TCGA-CQ-5326 | MSS | HNSC |
| TCGA-CQ-5327 | MSS | HNSC |
| TCGA-CQ-5329 | MSS | HNSC |
| TCGA-CQ-5330 | MSS | HNSC |
| TCGA-CQ-5331 | MSS | HNSC |
| TCGA-CQ-5332 | MSS | HNSC |
| TCGA-CQ-5333 | MSS | HNSC |
| TCGA-CQ-5334 | MSS | HNSC |
| TCGA-CQ-6218 | MSS | HNSC |
| TCGA-CQ-6219 | MSS | HNSC |
| TCGA-CQ-6220 | MSS | HNSC |
| TCGA-CQ-6221 | MSS | HNSC |
| TCGA-CQ-6222 | MSS | HNSC |
| TCGA-CQ-6223 | MSS | HNSC |
| TCGA-CQ-6224 | MSS | HNSC |
| TCGA-CQ-6225 | MSS | HNSC |
| TCGA-CQ-6227 | MSS | HNSC |
| TCGA-CQ-6228 | MSS | HNSC |
| TCGA-CQ-6229 | MSS | HNSC |
| TCGA-CQ-7063 | MSS | HNSC |
| TCGA-CQ-7064 | MSS | HNSC |
| TCGA-CQ-7065 | MSS | HNSC |
| TCGA-CQ-7068 | MSS | HNSC |
| TCGA-CQ-7069 | MSS | HNSC |
| TCGA-CQ-7071 | MSS | HNSC |
| TCGA-CQ-7072 | MSS | HNSC |
| TCGA-CQ-A4C6 | MSS | HNSC |
| TCGA-CQ-A4C7 | MSS | HNSC |
| TCGA-CQ-A4C9 | MSS | HNSC |
| TCGA-CQ-A4CA | MSS | HNSC |
| TCGA-CQ-A4CB | MSS | HNSC |
| TCGA-CQ-A4CD | MSS | HNSC |
| TCGA-CQ-A4CE | MSS | HNSC |
| TCGA-CQ-A4CG | MSS | HNSC |
| TCGA-CQ-A4CH | MSS | HNSC |
| TCGA-CQ-A4CI | MSS | HNSC |
| TCGA-CR-5243 | MSS | HNSC |
| TCGA-CR-5247 | MSS | HNSC |
| TCGA-CR-5248 | MSS | HNSC |
| TCGA-CR-5249 | MSS | HNSC |
| TCGA-CR-5250 | MSS | HNSC |
| TCGA-CR-6467 | MSS | HNSC |
| TCGA-CR-6470 | MSS | HNSC |
| TCGA-CR-6471 | MSS | HNSC |
| TCGA-CR-6472 | MSS | HNSC |
| TCGA-CR-6473 | MSS | HNSC |



|              |     |      |
|--------------|-----|------|
| TCGA-CR-6474 | MSS | HNSC |
| TCGA-CR-6477 | MSS | HNSC |
| TCGA-CR-6478 | MSS | HNSC |
| TCGA-CR-6480 | MSS | HNSC |
| TCGA-CR-6481 | MSS | HNSC |
| TCGA-CR-6482 | MSS | HNSC |
| TCGA-CR-6484 | MSS | HNSC |
| TCGA-CR-6487 | MSS | HNSC |
| TCGA-CR-6488 | MSS | HNSC |
| TCGA-CR-6491 | MSS | HNSC |
| TCGA-CR-6492 | MSS | HNSC |
| TCGA-CR-6493 | MSS | HNSC |
| TCGA-CR-7364 | MSS | HNSC |
| TCGA-CR-7365 | MSS | HNSC |
| TCGA-CR-7367 | MSS | HNSC |
| TCGA-CR-7368 | MSS | HNSC |
| TCGA-CR-7369 | MSS | HNSC |
| TCGA-CR-7370 | MSS | HNSC |
| TCGA-CR-7371 | MSS | HNSC |
| TCGA-CR-7372 | MSS | HNSC |
| TCGA-CR-7373 | MSS | HNSC |
| TCGA-CR-7374 | MSS | HNSC |
| TCGA-CR-7376 | MSS | HNSC |
| TCGA-CR-7377 | MSS | HNSC |
| TCGA-CR-7379 | MSS | HNSC |
| TCGA-CR-7380 | MSS | HNSC |
| TCGA-CR-7382 | MSS | HNSC |
| TCGA-CR-7383 | MSS | HNSC |
| TCGA-CR-7385 | MSS | HNSC |
| TCGA-CR-7386 | MSS | HNSC |
| TCGA-CR-7388 | MSS | HNSC |
| TCGA-CR-7389 | MSS | HNSC |
| TCGA-CR-7390 | MSS | HNSC |
| TCGA-CR-7391 | MSS | HNSC |
| TCGA-CR-7392 | MSS | HNSC |
| TCGA-CR-7393 | MSS | HNSC |
| TCGA-CR-7394 | MSS | HNSC |
| TCGA-CR-7395 | MSS | HNSC |
| TCGA-CR-7397 | MSS | HNSC |
| TCGA-CR-7398 | MSS | HNSC |
| TCGA-CR-7399 | MSS | HNSC |
| TCGA-CR-7401 | MSS | HNSC |
| TCGA-CR-7402 | MSS | HNSC |
| TCGA-CR-7404 | MSS | HNSC |
| TCGA-CS-4938 | MSS | LGG  |
| TCGA-CS-4941 | MSS | LGG  |
| TCGA-CS-4942 | MSS | LGG  |
| TCGA-CS-4943 | MSS | LGG  |
| TCGA-CS-4944 | MSS | LGG  |
| TCGA-CS-5390 | MSS | LGG  |
| TCGA-CS-5393 | MSS | LGG  |
| TCGA-CS-5394 | MSS | LGG  |

|              |              |      |
|--------------|--------------|------|
| TCGA-CS-5395 | MSS          | LGG  |
| TCGA-CS-5396 | MSS          | LGG  |
| TCGA-CS-5397 | MSS          | LGG  |
| TCGA-CS-6186 | MSS          | LGG  |
| TCGA-CS-6188 | MSS          | LGG  |
| TCGA-CS-6290 | MSS          | LGG  |
| TCGA-CS-6665 | MSS          | LGG  |
| TCGA-CS-6666 | MSS          | LGG  |
| TCGA-CS-6667 | MSS          | LGG  |
| TCGA-CS-6668 | MSS          | LGG  |
| TCGA-CS-6669 | MSS          | LGG  |
| TCGA-CS-6670 | MSS          | LGG  |
| TCGA-CU-A0YN | MSS          | BLCA |
| TCGA-CU-A0YO | MSS          | BLCA |
| TCGA-CU-A0YR | MSS          | BLCA |
| TCGA-CU-A3QU | MSS          | BLCA |
| TCGA-CU-A3YL | MSS          | BLCA |
| TCGA-CU-A5W6 | MSS          | BLCA |
| TCGA-CU-A72E | MSS          | BLCA |
| TCGA-CV-5430 | MSS          | HNSC |
| TCGA-CV-5432 | MSS          | HNSC |
| TCGA-CV-5434 | MSS          | HNSC |
| TCGA-CV-5435 | MSS          | HNSC |
| TCGA-CV-5436 | MSS          | HNSC |
| TCGA-CV-5439 | MSS          | HNSC |
| TCGA-CV-5440 | Intermediate | HNSC |
| TCGA-CV-5441 | MSS          | HNSC |
| TCGA-CV-5442 | MSS          | HNSC |
| TCGA-CV-5443 | MSS          | HNSC |
| TCGA-CV-5444 | MSS          | HNSC |
| TCGA-CV-5966 | MSS          | HNSC |
| TCGA-CV-5970 | MSS          | HNSC |
| TCGA-CV-5971 | MSS          | HNSC |
| TCGA-CV-5973 | MSS          | HNSC |
| TCGA-CV-5976 | MSS          | HNSC |
| TCGA-CV-5977 | MSS          | HNSC |
| TCGA-CV-5978 | MSS          | HNSC |
| TCGA-CV-5979 | MSS          | HNSC |
| TCGA-CV-6003 | MSS          | HNSC |
| TCGA-CV-6433 | MSS          | HNSC |
| TCGA-CV-6436 | MSS          | HNSC |
| TCGA-CV-6441 | MSS          | HNSC |
| TCGA-CV-6933 | MSS          | HNSC |
| TCGA-CV-6934 | MSS          | HNSC |
| TCGA-CV-6935 | MSS          | HNSC |
| TCGA-CV-6936 | MSS          | HNSC |
| TCGA-CV-6937 | MSS          | HNSC |
| TCGA-CV-6938 | MSS          | HNSC |
| TCGA-CV-6939 | MSS          | HNSC |
| TCGA-CV-6940 | MSS          | HNSC |
| TCGA-CV-6941 | MSS          | HNSC |
| TCGA-CV-6942 | MSS          | HNSC |

|              |     |      |
|--------------|-----|------|
| TCGA-CV-6943 | MSS | HNSC |
| TCGA-CV-6945 | MSS | HNSC |
| TCGA-CV-6948 | MSS | HNSC |
| TCGA-CV-6950 | MSS | HNSC |
| TCGA-CV-6951 | MSS | HNSC |
| TCGA-CV-6952 | MSS | HNSC |
| TCGA-CV-6953 | MSS | HNSC |
| TCGA-CV-6954 | MSS | HNSC |
| TCGA-CV-6955 | MSS | HNSC |
| TCGA-CV-6956 | MSS | HNSC |
| TCGA-CV-6959 | MSS | HNSC |
| TCGA-CV-6960 | MSS | HNSC |
| TCGA-CV-6961 | MSS | HNSC |
| TCGA-CV-6962 | MSS | HNSC |
| TCGA-CV-7089 | MSS | HNSC |
| TCGA-CV-7090 | MSS | HNSC |
| TCGA-CV-7091 | MSS | HNSC |
| TCGA-CV-7095 | MSS | HNSC |
| TCGA-CV-7097 | MSS | HNSC |
| TCGA-CV-7099 | MSS | HNSC |
| TCGA-CV-7100 | MSS | HNSC |
| TCGA-CV-7101 | MSS | HNSC |
| TCGA-CV-7102 | MSS | HNSC |
| TCGA-CV-7103 | MSS | HNSC |
| TCGA-CV-7104 | MSS | HNSC |
| TCGA-CV-7177 | MSS | HNSC |
| TCGA-CV-7178 | MSS | HNSC |
| TCGA-CV-7180 | MSS | HNSC |
| TCGA-CV-7183 | MSS | HNSC |
| TCGA-CV-7235 | MSS | HNSC |
| TCGA-CV-7236 | MSS | HNSC |
| TCGA-CV-7238 | MSS | HNSC |
| TCGA-CV-7242 | MSS | HNSC |
| TCGA-CV-7243 | MSS | HNSC |
| TCGA-CV-7245 | MSS | HNSC |
| TCGA-CV-7247 | MSS | HNSC |
| TCGA-CV-7248 | MSS | HNSC |
| TCGA-CV-7250 | MSS | HNSC |
| TCGA-CV-7252 | MSS | HNSC |
| TCGA-CV-7253 | MSS | HNSC |
| TCGA-CV-7254 | MSS | HNSC |
| TCGA-CV-7255 | MSS | HNSC |
| TCGA-CV-7261 | MSS | HNSC |
| TCGA-CV-7263 | MSS | HNSC |
| TCGA-CV-7406 | MSS | HNSC |
| TCGA-CV-7407 | MSS | HNSC |
| TCGA-CV-7410 | MSS | HNSC |
| TCGA-CV-7411 | MSS | HNSC |
| TCGA-CV-7413 | MSS | HNSC |
| TCGA-CV-7414 | MSS | HNSC |
| TCGA-CV-7415 | MSS | HNSC |
| TCGA-CV-7416 | MSS | HNSC |

|              |       |      |
|--------------|-------|------|
| TCGA-CV-7418 | MSS   | HNSC |
| TCGA-CV-7421 | MSS   | HNSC |
| TCGA-CV-7422 | MSS   | HNSC |
| TCGA-CV-7423 | MSS   | HNSC |
| TCGA-CV-7424 | MSS   | HNSC |
| TCGA-CV-7425 | MSS   | HNSC |
| TCGA-CV-7427 | MSS   | HNSC |
| TCGA-CV-7429 | MSS   | HNSC |
| TCGA-CV-7430 | MSS   | HNSC |
| TCGA-CV-7432 | MSS   | HNSC |
| TCGA-CV-7433 | MSS   | HNSC |
| TCGA-CV-7434 | MSS   | HNSC |
| TCGA-CV-7435 | MSS   | HNSC |
| TCGA-CV-7437 | MSS   | HNSC |
| TCGA-CV-7438 | MSS   | HNSC |
| TCGA-CV-7440 | MSS   | HNSC |
| TCGA-CV-7446 | MSS   | HNSC |
| TCGA-CV-7568 | MSS   | HNSC |
| TCGA-CV-A45O | MSS   | HNSC |
| TCGA-CV-A45P | MSS   | HNSC |
| TCGA-CV-A45Q | MSS   | HNSC |
| TCGA-CV-A45R | MSS   | HNSC |
| TCGA-CV-A45T | MSS   | HNSC |
| TCGA-CV-A45U | MSS   | HNSC |
| TCGA-CV-A45V | MSS   | HNSC |
| TCGA-CV-A45W | MSS   | HNSC |
| TCGA-CV-A45X | MSS   | HNSC |
| TCGA-CV-A45Y | MSS   | HNSC |
| TCGA-CV-A45Z | MSS   | HNSC |
| TCGA-CV-A460 | MSS   | HNSC |
| TCGA-CV-A461 | MSS   | HNSC |
| TCGA-CV-A463 | MSS   | HNSC |
| TCGA-CV-A464 | MSS   | HNSC |
| TCGA-CV-A465 | MSS   | HNSC |
| TCGA-CV-A468 | MSS   | HNSC |
| TCGA-CV-A6JD | MSS   | HNSC |
| TCGA-CV-A6JE | MSS   | HNSC |
| TCGA-CV-A6JM | MSS   | HNSC |
| TCGA-CV-A6JN | MSS   | HNSC |
| TCGA-CV-A6JO | MSS   | HNSC |
| TCGA-CV-A6JT | MSS   | HNSC |
| TCGA-CV-A6JU | MSS   | HNSC |
| TCGA-CV-A6JY | MSS   | HNSC |
| TCGA-CV-A6JZ | MSS   | HNSC |
| TCGA-CV-A6K0 | MSS   | HNSC |
| TCGA-CV-A6K1 | MSI-H | HNSC |
| TCGA-CV-A6K2 | MSS   | HNSC |
| TCGA-CW-5580 | MSS   | KIRC |
| TCGA-CW-5581 | MSS   | KIRC |
| TCGA-CW-5583 | MSS   | KIRC |
| TCGA-CW-5584 | MSS   | KIRC |
| TCGA-CW-5585 | MSS   | KIRC |

|              |              |      |
|--------------|--------------|------|
| TCGA-CW-5587 | MSS          | KIRC |
| TCGA-CW-5588 | MSS          | KIRC |
| TCGA-CW-5589 | Intermediate | KIRC |
| TCGA-CW-5591 | MSS          | KIRC |
| TCGA-CW-6087 | MSI-H        | KIRC |
| TCGA-CW-6090 | MSS          | KIRC |
| TCGA-CW-6093 | MSS          | KIRC |
| TCGA-CW-6097 | MSS          | KIRC |
| TCGA-CX-7082 | MSS          | HNSC |
| TCGA-CX-7085 | MSS          | HNSC |
| TCGA-CX-7086 | MSS          | HNSC |
| TCGA-CX-7219 | MSS          | HNSC |
| TCGA-CX-A4AQ | MSS          | HNSC |
| TCGA-CZ-4853 | MSS          | KIRC |
| TCGA-CZ-4856 | MSS          | KIRC |
| TCGA-CZ-4859 | MSS          | KIRC |
| TCGA-CZ-4863 | MSS          | KIRC |
| TCGA-CZ-4864 | MSS          | KIRC |
| TCGA-CZ-4865 | MSS          | KIRC |
| TCGA-CZ-4866 | MSS          | KIRC |
| TCGA-CZ-5451 | MSS          | KIRC |
| TCGA-CZ-5452 | MSS          | KIRC |
| TCGA-CZ-5453 | MSS          | KIRC |
| TCGA-CZ-5454 | MSS          | KIRC |
| TCGA-CZ-5455 | MSS          | KIRC |
| TCGA-CZ-5456 | MSS          | KIRC |
| TCGA-CZ-5457 | MSS          | KIRC |
| TCGA-CZ-5458 | MSS          | KIRC |
| TCGA-CZ-5459 | MSS          | KIRC |
| TCGA-CZ-5460 | MSS          | KIRC |
| TCGA-CZ-5461 | MSS          | KIRC |
| TCGA-CZ-5462 | MSS          | KIRC |
| TCGA-CZ-5463 | MSS          | KIRC |
| TCGA-CZ-5464 | MSS          | KIRC |
| TCGA-CZ-5465 | MSS          | KIRC |
| TCGA-CZ-5466 | MSS          | KIRC |
| TCGA-CZ-5467 | MSS          | KIRC |
| TCGA-CZ-5468 | MSS          | KIRC |
| TCGA-CZ-5469 | MSS          | KIRC |
| TCGA-CZ-5470 | MSS          | KIRC |
| TCGA-CZ-5982 | MSS          | KIRC |
| TCGA-CZ-5984 | MSS          | KIRC |
| TCGA-CZ-5985 | MSS          | KIRC |
| TCGA-CZ-5986 | MSS          | KIRC |
| TCGA-CZ-5987 | MSS          | KIRC |
| TCGA-CZ-5988 | MSS          | KIRC |
| TCGA-CZ-5989 | MSS          | KIRC |
| TCGA-D1-A0ZN | MSS          | UCEC |
| TCGA-D1-A0ZO | MSI-H        | UCEC |
| TCGA-D1-A0ZP | MSS          | UCEC |
| TCGA-D1-A0ZQ | MSS          | UCEC |
| TCGA-D1-A0ZR | MSS          | UCEC |

|              |              |      |
|--------------|--------------|------|
| TCGA-D1-A0ZS | MSI-H        | UCEC |
| TCGA-D1-A0ZU | MSS          | UCEC |
| TCGA-D1-A0ZV | MSS          | UCEC |
| TCGA-D1-A0ZZ | MSS          | UCEC |
| TCGA-D1-A101 | MSI-H        | UCEC |
| TCGA-D1-A102 | MSS          | UCEC |
| TCGA-D1-A103 | MSI-H        | UCEC |
| TCGA-D1-A15V | MSS          | UCEC |
| TCGA-D1-A15W | MSS          | UCEC |
| TCGA-D1-A15X | MSI-H        | UCEC |
| TCGA-D1-A15Z | MSS          | UCEC |
| TCGA-D1-A160 | MSI-H        | UCEC |
| TCGA-D1-A161 | MSS          | UCEC |
| TCGA-D1-A163 | MSI-H        | UCEC |
| TCGA-D1-A165 | MSS          | UCEC |
| TCGA-D1-A167 | MSI-H        | UCEC |
| TCGA-D1-A168 | MSS          | UCEC |
| TCGA-D1-A169 | MSS          | UCEC |
| TCGA-D1-A16B | MSS          | UCEC |
| TCGA-D1-A16D | MSS          | UCEC |
| TCGA-D1-A16E | MSS          | UCEC |
| TCGA-D1-A16F | MSI-H        | UCEC |
| TCGA-D1-A16G | MSS          | UCEC |
| TCGA-D1-A16I | MSS          | UCEC |
| TCGA-D1-A16J | MSS          | UCEC |
| TCGA-D1-A16N | Intermediate | UCEC |
| TCGA-D1-A16O | MSS          | UCEC |
| TCGA-D1-A16Q | MSS          | UCEC |
| TCGA-D1-A16R | MSS          | UCEC |
| TCGA-D1-A16S | MSS          | UCEC |
| TCGA-D1-A16V | MSS          | UCEC |
| TCGA-D1-A16X | MSS          | UCEC |
| TCGA-D1-A16Y | MSS          | UCEC |
| TCGA-D1-A174 | MSI-H        | UCEC |
| TCGA-D1-A175 | MSI-H        | UCEC |
| TCGA-D1-A176 | MSI-H        | UCEC |
| TCGA-D1-A177 | MSI-H        | UCEC |
| TCGA-D1-A179 | MSS          | UCEC |
| TCGA-D1-A17A | MSI-H        | UCEC |
| TCGA-D1-A17B | MSI-H        | UCEC |
| TCGA-D1-A17C | MSS          | UCEC |
| TCGA-D1-A17D | MSI-H        | UCEC |
| TCGA-D1-A17F | MSI-H        | UCEC |
| TCGA-D1-A17H | MSI-H        | UCEC |
| TCGA-D1-A17K | MSS          | UCEC |
| TCGA-D1-A17L | MSS          | UCEC |
| TCGA-D1-A17M | MSI-H        | UCEC |
| TCGA-D1-A17N | MSS          | UCEC |
| TCGA-D1-A17Q | MSS          | UCEC |
| TCGA-D1-A17R | MSI-H        | UCEC |
| TCGA-D1-A17S | MSS          | UCEC |
| TCGA-D1-A17T | MSS          | UCEC |

|              |              |      |
|--------------|--------------|------|
| TCGA-D1-A17U | MSI-H        | UCEC |
| TCGA-D1-A1NS | MSI-H        | UCEC |
| TCGA-D1-A1NU | MSS          | UCEC |
| TCGA-D1-A1NW | MSS          | UCEC |
| TCGA-D1-A1NX | MSS          | UCEC |
| TCGA-D1-A1NY | MSI-H        | UCEC |
| TCGA-D1-A1NZ | MSI-H        | UCEC |
| TCGA-D1-A1O0 | MSS          | UCEC |
| TCGA-D1-A1O7 | MSI-H        | UCEC |
| TCGA-D1-A2G0 | MSI-H        | UCEC |
| TCGA-D1-A2G5 | Intermediate | UCEC |
| TCGA-D1-A3DA | MSS          | UCEC |
| TCGA-D1-A3DG | MSS          | UCEC |
| TCGA-D1-A3DH | MSS          | UCEC |
| TCGA-D1-A3JQ | MSS          | UCEC |
| TCGA-D3-A1Q1 | MSS          | SKCM |
| TCGA-D3-A1Q7 | MSS          | SKCM |
| TCGA-D3-A1Q8 | MSS          | SKCM |
| TCGA-D3-A1QA | MSS          | SKCM |
| TCGA-D3-A1QB | MSS          | SKCM |
| TCGA-D3-A2J6 | MSS          | SKCM |
| TCGA-D3-A2J7 | MSS          | SKCM |
| TCGA-D3-A2J8 | MSS          | SKCM |
| TCGA-D3-A2JA | MSS          | SKCM |
| TCGA-D3-A2JC | MSS          | SKCM |
| TCGA-D3-A2JD | MSS          | SKCM |
| TCGA-D3-A2JE | MSS          | SKCM |
| TCGA-D3-A2JF | MSS          | SKCM |
| TCGA-D3-A2JG | MSS          | SKCM |
| TCGA-D3-A2JH | MSS          | SKCM |
| TCGA-D3-A2JK | MSS          | SKCM |
| TCGA-D3-A2JL | MSS          | SKCM |
| TCGA-D3-A2JN | MSS          | SKCM |
| TCGA-D3-A2JO | MSS          | SKCM |
| TCGA-D3-A2JP | MSS          | SKCM |
| TCGA-D3-A3BZ | MSS          | SKCM |
| TCGA-D3-A3C1 | MSS          | SKCM |
| TCGA-D3-A3C3 | MSS          | SKCM |
| TCGA-D3-A3C6 | MSS          | SKCM |
| TCGA-D3-A3C7 | MSS          | SKCM |
| TCGA-D3-A3C8 | MSS          | SKCM |
| TCGA-D3-A3CB | MSS          | SKCM |
| TCGA-D3-A3CC | MSS          | SKCM |
| TCGA-D3-A3CE | MSS          | SKCM |
| TCGA-D3-A3CF | MSS          | SKCM |
| TCGA-D3-A3MO | MSS          | SKCM |
| TCGA-D3-A3MR | MSS          | SKCM |
| TCGA-D3-A3MU | MSS          | SKCM |
| TCGA-D3-A51E | MSS          | SKCM |
| TCGA-D3-A51G | MSS          | SKCM |
| TCGA-D3-A51H | MSS          | SKCM |
| TCGA-D3-A51J | MSS          | SKCM |

|              |       |      |
|--------------|-------|------|
| TCGA-D3-A51K | MSS   | SKCM |
| TCGA-D3-A51N | MSS   | SKCM |
| TCGA-D3-A51T | MSS   | SKCM |
| TCGA-D3-A5GL | MSS   | SKCM |
| TCGA-D3-A5GN | MSS   | SKCM |
| TCGA-D3-A5GO | MSS   | SKCM |
| TCGA-D3-A5GR | MSS   | SKCM |
| TCGA-D3-A5GS | MSS   | SKCM |
| TCGA-D3-A5GT | MSS   | SKCM |
| TCGA-D3-A5GU | MSS   | SKCM |
| TCGA-D3-A8GB | MSS   | SKCM |
| TCGA-D3-A8GC | MSS   | SKCM |
| TCGA-D3-A8GD | MSS   | SKCM |
| TCGA-D3-A8GE | MSS   | SKCM |
| TCGA-D3-A8GI | MSS   | SKCM |
| TCGA-D3-A8GJ | MSS   | SKCM |
| TCGA-D3-A8GK | MSS   | SKCM |
| TCGA-D3-A8GL | MSS   | SKCM |
| TCGA-D3-A8GM | MSI-H | SKCM |
| TCGA-D3-A8GN | MSS   | SKCM |
| TCGA-D3-A8GO | MSS   | SKCM |
| TCGA-D3-A8GP | MSS   | SKCM |
| TCGA-D3-A8GQ | MSS   | SKCM |
| TCGA-D3-A8GR | MSS   | SKCM |
| TCGA-D3-A8GS | MSS   | SKCM |
| TCGA-D3-A8GV | MSS   | SKCM |
| TCGA-D5-5537 | MSS   | COAD |
| TCGA-D5-5538 | MSS   | COAD |
| TCGA-D5-5539 | MSS   | COAD |
| TCGA-D5-5540 | MSS   | COAD |
| TCGA-D5-5541 | MSS   | COAD |
| TCGA-D5-6529 | MSS   | COAD |
| TCGA-D5-6530 | MSI-H | COAD |
| TCGA-D5-6531 | MSS   | COAD |
| TCGA-D5-6532 | MSS   | COAD |
| TCGA-D5-6533 | MSS   | COAD |
| TCGA-D5-6534 | MSS   | COAD |
| TCGA-D5-6535 | MSS   | COAD |
| TCGA-D5-6537 | MSS   | COAD |
| TCGA-D5-6538 | MSS   | COAD |
| TCGA-D5-6539 | MSS   | COAD |
| TCGA-D5-6540 | MSI-H | COAD |
| TCGA-D5-6541 | MSS   | COAD |
| TCGA-D5-6898 | MSS   | COAD |
| TCGA-D5-6920 | MSS   | COAD |
| TCGA-D5-6922 | MSS   | COAD |
| TCGA-D5-6923 | MSS   | COAD |
| TCGA-D5-6924 | MSS   | COAD |
| TCGA-D5-6926 | MSS   | COAD |
| TCGA-D5-6927 | MSI-H | COAD |
| TCGA-D5-6928 | MSI-H | COAD |
| TCGA-D5-6929 | MSS   | COAD |



|              |       |      |
|--------------|-------|------|
| TCGA-D5-6930 | MSI-H | COAD |
| TCGA-D5-6931 | MSS   | COAD |
| TCGA-D5-6932 | MSS   | COAD |
| TCGA-D5-7000 | MSS   | COAD |
| TCGA-D6-6515 | MSS   | HNSC |
| TCGA-D6-6516 | MSS   | HNSC |
| TCGA-D6-6517 | MSS   | HNSC |
| TCGA-D6-6823 | MSS   | HNSC |
| TCGA-D6-6824 | MSS   | HNSC |
| TCGA-D6-6825 | MSS   | HNSC |
| TCGA-D6-6826 | MSS   | HNSC |
| TCGA-D6-6827 | MSS   | HNSC |
| TCGA-D6-8568 | MSS   | HNSC |
| TCGA-D6-8569 | MSS   | HNSC |
| TCGA-D6-A4Z9 | MSS   | HNSC |
| TCGA-D6-A4ZB | MSS   | HNSC |
| TCGA-D6-A6EK | MSS   | HNSC |
| TCGA-D6-A6EM | MSS   | HNSC |
| TCGA-D6-A6EN | MSS   | HNSC |
| TCGA-D6-A6EO | MSS   | HNSC |
| TCGA-D6-A6EP | MSS   | HNSC |
| TCGA-D6-A6EQ | MSS   | HNSC |
| TCGA-D6-A6ES | MSS   | HNSC |
| TCGA-D6-A74Q | MSS   | HNSC |
| TCGA-D7-5577 | MSS   | STAD |
| TCGA-D7-5578 | MSS   | STAD |
| TCGA-D7-5579 | MSS   | STAD |
| TCGA-D7-6518 | MSS   | STAD |
| TCGA-D7-6519 | MSS   | STAD |
| TCGA-D7-6520 | MSS   | STAD |
| TCGA-D7-6521 | MSS   | STAD |
| TCGA-D7-6522 | MSS   | STAD |
| TCGA-D7-6524 | MSS   | STAD |
| TCGA-D7-6525 | MSS   | STAD |
| TCGA-D7-6526 | MSS   | STAD |
| TCGA-D7-6527 | MSS   | STAD |
| TCGA-D7-6528 | MSS   | STAD |
| TCGA-D7-6815 | MSS   | STAD |
| TCGA-D7-6817 | MSS   | STAD |
| TCGA-D7-6818 | MSS   | STAD |
| TCGA-D7-6820 | MSS   | STAD |
| TCGA-D7-6822 | MSS   | STAD |
| TCGA-D7-8570 | MSS   | STAD |
| TCGA-D7-8572 | MSS   | STAD |
| TCGA-D7-8573 | MSS   | STAD |
| TCGA-D7-8574 | MSS   | STAD |
| TCGA-D7-8575 | MSS   | STAD |
| TCGA-D7-8576 | MSS   | STAD |
| TCGA-D7-8578 | MSS   | STAD |
| TCGA-D7-8579 | MSS   | STAD |
| TCGA-D7-A4YT | MSS   | STAD |
| TCGA-D7-A4YU | MSS   | STAD |

|              |              |      |
|--------------|--------------|------|
| TCGA-D7-A4YV | MSI-H        | STAD |
| TCGA-D7-A4YX | MSS          | STAD |
| TCGA-D7-A4YY | MSI-H        | STAD |
| TCGA-D7-A4Z0 | MSS          | STAD |
| TCGA-D7-A6ET | MSS          | STAD |
| TCGA-D7-A6EV | MSS          | STAD |
| TCGA-D7-A6EX | MSS          | STAD |
| TCGA-D7-A6EY | MSI-H        | STAD |
| TCGA-D7-A6EZ | MSS          | STAD |
| TCGA-D7-A6F0 | MSS          | STAD |
| TCGA-D7-A6F2 | MSS          | STAD |
| TCGA-D7-A747 | MSS          | STAD |
| TCGA-D7-A748 | MSS          | STAD |
| TCGA-D7-A74A | MSS          | STAD |
| TCGA-D7-A74B | MSS          | STAD |
| TCGA-D8-A13Y | MSS          | BRCA |
| TCGA-D8-A13Z | MSS          | BRCA |
| TCGA-D8-A140 | MSS          | BRCA |
| TCGA-D8-A141 | MSS          | BRCA |
| TCGA-D8-A142 | MSS          | BRCA |
| TCGA-D8-A143 | MSS          | BRCA |
| TCGA-D8-A145 | MSS          | BRCA |
| TCGA-D8-A146 | MSS          | BRCA |
| TCGA-D8-A147 | MSS          | BRCA |
| TCGA-D8-A1J8 | MSI-H        | BRCA |
| TCGA-D8-A1J9 | MSS          | BRCA |
| TCGA-D8-A1JA | MSS          | BRCA |
| TCGA-D8-A1JB | MSS          | BRCA |
| TCGA-D8-A1JC | MSS          | BRCA |
| TCGA-D8-A1JD | MSS          | BRCA |
| TCGA-D8-A1JE | MSI-H        | BRCA |
| TCGA-D8-A1JF | MSS          | BRCA |
| TCGA-D8-A1JG | MSS          | BRCA |
| TCGA-D8-A1JH | MSS          | BRCA |
| TCGA-D8-A1JI | MSS          | BRCA |
| TCGA-D8-A1JJ | MSS          | BRCA |
| TCGA-D8-A1JK | MSS          | BRCA |
| TCGA-D8-A1JL | MSS          | BRCA |
| TCGA-D8-A1JM | Intermediate | BRCA |
| TCGA-D8-A1JN | MSS          | BRCA |
| TCGA-D8-A1JP | MSS          | BRCA |
| TCGA-D8-A1JS | MSS          | BRCA |
| TCGA-D8-A1JT | MSS          | BRCA |
| TCGA-D8-A1JU | MSI-H        | BRCA |
| TCGA-D8-A1X5 | MSS          | BRCA |
| TCGA-D8-A1X7 | MSS          | BRCA |
| TCGA-D8-A1X8 | MSS          | BRCA |
| TCGA-D8-A1X9 | MSI-H        | BRCA |
| TCGA-D8-A1XA | MSS          | BRCA |
| TCGA-D8-A1XB | MSS          | BRCA |
| TCGA-D8-A1XC | MSS          | BRCA |
| TCGA-D8-A1XF | MSS          | BRCA |

|              |       |      |
|--------------|-------|------|
| TCGA-D8-A1XG | MSI-H | BRCA |
| TCGA-D8-A1XJ | MSS   | BRCA |
| TCGA-D8-A1XK | MSI-H | BRCA |
| TCGA-D8-A1XL | MSS   | BRCA |
| TCGA-D8-A1XM | MSS   | BRCA |
| TCGA-D8-A1XO | MSS   | BRCA |
| TCGA-D8-A1XQ | MSI-H | BRCA |
| TCGA-D8-A1XR | MSS   | BRCA |
| TCGA-D8-A1XS | MSS   | BRCA |
| TCGA-D8-A1XT | MSS   | BRCA |
| TCGA-D8-A1XU | MSS   | BRCA |
| TCGA-D8-A1XV | MSS   | BRCA |
| TCGA-D8-A1XW | MSS   | BRCA |
| TCGA-D8-A1XY | MSS   | BRCA |
| TCGA-D8-A1XZ | MSS   | BRCA |
| TCGA-D8-A1Y0 | MSI-H | BRCA |
| TCGA-D8-A1Y1 | MSI-H | BRCA |
| TCGA-D8-A1Y2 | MSI-H | BRCA |
| TCGA-D8-A1Y3 | MSS   | BRCA |
| TCGA-D8-A27E | MSS   | BRCA |
| TCGA-D8-A27F | MSS   | BRCA |
| TCGA-D8-A27G | MSS   | BRCA |
| TCGA-D8-A27I | MSS   | BRCA |
| TCGA-D8-A27K | MSS   | BRCA |
| TCGA-D8-A27L | MSS   | BRCA |
| TCGA-D8-A27M | MSS   | BRCA |
| TCGA-D8-A27N | MSS   | BRCA |
| TCGA-D8-A27P | MSS   | BRCA |
| TCGA-D8-A27R | MSS   | BRCA |
| TCGA-D8-A27T | MSS   | BRCA |
| TCGA-D8-A27V | MSS   | BRCA |
| TCGA-D8-A27W | MSS   | BRCA |
| TCGA-D8-A73U | MSS   | BRCA |
| TCGA-D8-A73W | MSS   | BRCA |
| TCGA-D8-A73X | MSS   | BRCA |
| TCGA-D9-A148 | MSS   | SKCM |
| TCGA-D9-A149 | MSS   | SKCM |
| TCGA-D9-A1JW | MSS   | SKCM |
| TCGA-D9-A1JX | MSS   | SKCM |
| TCGA-D9-A1X3 | MSS   | SKCM |
| TCGA-D9-A3Z1 | MSS   | SKCM |
| TCGA-D9-A3Z3 | MSS   | SKCM |
| TCGA-D9-A3Z4 | MSS   | SKCM |
| TCGA-D9-A4Z2 | MSS   | SKCM |
| TCGA-D9-A4Z3 | MSS   | SKCM |
| TCGA-D9-A4Z5 | MSS   | SKCM |
| TCGA-D9-A4Z6 | MSS   | SKCM |
| TCGA-D9-A6E9 | MSS   | SKCM |
| TCGA-D9-A6EA | MSS   | SKCM |
| TCGA-D9-A6EC | MSS   | SKCM |
| TCGA-D9-A6EG | MSS   | SKCM |
| TCGA-DA-A1HV | MSS   | SKCM |

|              |     |      |
|--------------|-----|------|
| TCGA-DA-A1HW | MSS | SKCM |
| TCGA-DA-A1HY | MSS | SKCM |
| TCGA-DA-A1I0 | MSS | SKCM |
| TCGA-DA-A1I1 | MSS | SKCM |
| TCGA-DA-A1I2 | MSS | SKCM |
| TCGA-DA-A1I4 | MSS | SKCM |
| TCGA-DA-A1I5 | MSS | SKCM |
| TCGA-DA-A1I7 | MSS | SKCM |
| TCGA-DA-A1I8 | MSS | SKCM |
| TCGA-DA-A1IA | MSS | SKCM |
| TCGA-DA-A1IB | MSS | SKCM |
| TCGA-DA-A1IC | MSS | SKCM |
| TCGA-DA-A3F2 | MSS | SKCM |
| TCGA-DA-A3F5 | MSS | SKCM |
| TCGA-DA-A3F8 | MSS | SKCM |
| TCGA-DA-A95V | MSS | SKCM |
| TCGA-DA-A95W | MSS | SKCM |
| TCGA-DA-A95X | MSS | SKCM |
| TCGA-DA-A95Y | MSS | SKCM |
| TCGA-DA-A95Z | MSS | SKCM |
| TCGA-DA-A960 | MSS | SKCM |
| TCGA-DB-5270 | MSS | LGG  |
| TCGA-DB-5273 | MSS | LGG  |
| TCGA-DB-5274 | MSS | LGG  |
| TCGA-DB-5275 | MSS | LGG  |
| TCGA-DB-5276 | MSS | LGG  |
| TCGA-DB-5277 | MSS | LGG  |
| TCGA-DB-5278 | MSS | LGG  |
| TCGA-DB-5279 | MSS | LGG  |
| TCGA-DB-5280 | MSS | LGG  |
| TCGA-DB-5281 | MSS | LGG  |
| TCGA-DB-A4XD | MSS | LGG  |
| TCGA-DB-A4XE | MSS | LGG  |
| TCGA-DB-A4XF | MSS | LGG  |
| TCGA-DB-A4XG | MSS | LGG  |
| TCGA-DB-A4XH | MSS | LGG  |
| TCGA-DB-A64L | MSS | LGG  |
| TCGA-DB-A64O | MSS | LGG  |
| TCGA-DB-A64P | MSS | LGG  |
| TCGA-DB-A64Q | MSS | LGG  |
| TCGA-DB-A64R | MSS | LGG  |
| TCGA-DB-A64S | MSS | LGG  |
| TCGA-DB-A64U | MSS | LGG  |
| TCGA-DB-A64V | MSS | LGG  |
| TCGA-DB-A64W | MSS | LGG  |
| TCGA-DB-A64X | MSS | LGG  |
| TCGA-DB-A75K | MSS | LGG  |
| TCGA-DB-A75L | MSS | LGG  |
| TCGA-DB-A75M | MSS | LGG  |
| TCGA-DB-A75O | MSS | LGG  |
| TCGA-DB-A75P | MSS | LGG  |
| TCGA-DC-4745 | MSS | READ |

|              |              |      |
|--------------|--------------|------|
| TCGA-DC-4749 | MSS          | READ |
| TCGA-DC-5337 | MSS          | READ |
| TCGA-DC-5869 | MSS          | READ |
| TCGA-DC-6155 | MSS          | READ |
| TCGA-DC-6157 | MSS          | READ |
| TCGA-DC-6158 | MSS          | READ |
| TCGA-DC-6160 | MSS          | READ |
| TCGA-DC-6681 | MSS          | READ |
| TCGA-DC-6682 | MSS          | READ |
| TCGA-DC-6683 | MSS          | READ |
| TCGA-DD-A113 | MSS          | LIHC |
| TCGA-DD-A114 | MSS          | LIHC |
| TCGA-DD-A115 | MSS          | LIHC |
| TCGA-DD-A116 | MSS          | LIHC |
| TCGA-DD-A118 | MSS          | LIHC |
| TCGA-DD-A119 | MSS          | LIHC |
| TCGA-DD-A11A | MSS          | LIHC |
| TCGA-DD-A11B | MSS          | LIHC |
| TCGA-DD-A11C | MSS          | LIHC |
| TCGA-DD-A11D | MSS          | LIHC |
| TCGA-DD-A1E9 | MSS          | LIHC |
| TCGA-DD-A1EA | MSS          | LIHC |
| TCGA-DD-A1EB | MSS          | LIHC |
| TCGA-DD-A1EC | MSS          | LIHC |
| TCGA-DD-A1ED | MSS          | LIHC |
| TCGA-DD-A1EE | MSS          | LIHC |
| TCGA-DD-A1EF | MSS          | LIHC |
| TCGA-DD-A1EG | MSS          | LIHC |
| TCGA-DD-A1EH | MSS          | LIHC |
| TCGA-DD-A1EI | MSS          | LIHC |
| TCGA-DD-A1EJ | MSS          | LIHC |
| TCGA-DD-A1EK | MSS          | LIHC |
| TCGA-DD-A1EL | MSS          | LIHC |
| TCGA-DD-A39V | MSS          | LIHC |
| TCGA-DD-A39W | MSS          | LIHC |
| TCGA-DD-A39X | MSS          | LIHC |
| TCGA-DD-A39Y | MSS          | LIHC |
| TCGA-DD-A39Z | MSS          | LIHC |
| TCGA-DD-A3A0 | Intermediate | LIHC |
| TCGA-DD-A3A1 | MSS          | LIHC |
| TCGA-DD-A3A2 | MSS          | LIHC |
| TCGA-DD-A3A3 | MSS          | LIHC |
| TCGA-DD-A3A4 | MSS          | LIHC |
| TCGA-DD-A3A5 | MSS          | LIHC |
| TCGA-DD-A3A6 | MSS          | LIHC |
| TCGA-DD-A3A7 | MSS          | LIHC |
| TCGA-DD-A3A8 | MSS          | LIHC |
| TCGA-DD-A3A9 | MSS          | LIHC |
| TCGA-DD-A4NB | MSS          | LIHC |
| TCGA-DD-A4ND | MSS          | LIHC |
| TCGA-DD-A4NR | MSS          | LIHC |
| TCGA-DD-A4NS | MSS          | LIHC |

|              |     |      |
|--------------|-----|------|
| TCGA-DD-A4NV | MSS | LIHC |
| TCGA-DD-A73A | MSS | LIHC |
| TCGA-DD-A73B | MSS | LIHC |
| TCGA-DD-A73C | MSS | LIHC |
| TCGA-DD-A73D | MSS | LIHC |
| TCGA-DD-A73E | MSS | LIHC |
| TCGA-DD-A73F | MSS | LIHC |
| TCGA-DD-A73G | MSS | LIHC |
| TCGA-DD-AA3A | MSS | LIHC |
| TCGA-DD-AAC8 | MSS | LIHC |
| TCGA-DD-AAC9 | MSS | LIHC |
| TCGA-DD-AACA | MSS | LIHC |
| TCGA-DD-AACA | MSS | LIHC |
| TCGA-DD-AACA | MSS | LIHC |
| TCGA-DD-AACB | MSS | LIHC |
| TCGA-DD-AACC | MSS | LIHC |
| TCGA-DD-AACD | MSS | LIHC |
| TCGA-DD-AACE | MSS | LIHC |
| TCGA-DD-AACF | MSS | LIHC |
| TCGA-DD-AACG | MSS | LIHC |
| TCGA-DD-AACH | MSS | LIHC |
| TCGA-DD-AACI | MSS | LIHC |
| TCGA-DD-AACJ | MSS | LIHC |
| TCGA-DD-AACK | MSS | LIHC |
| TCGA-DD-AACL | MSS | LIHC |
| TCGA-DD-AACM | MSS | LIHC |
| TCGA-DD-AACN | MSS | LIHC |
| TCGA-DD-AACO | MSS | LIHC |
| TCGA-DD-AACP | MSS | LIHC |
| TCGA-DD-AACQ | MSS | LIHC |
| TCGA-DD-AACS | MSS | LIHC |
| TCGA-DD-AACT | MSS | LIHC |
| TCGA-DD-AACU | MSS | LIHC |
| TCGA-DD-AACV | MSS | LIHC |
| TCGA-DD-AACW | MSS | LIHC |
| TCGA-DD-AACX | MSS | LIHC |
| TCGA-DD-AACY | MSS | LIHC |
| TCGA-DD-AACZ | MSS | LIHC |
| TCGA-DD-AAD0 | MSS | LIHC |
| TCGA-DD-AAD1 | MSS | LIHC |
| TCGA-DD-AAD2 | MSS | LIHC |
| TCGA-DD-AAD3 | MSS | LIHC |
| TCGA-DD-AAD5 | MSS | LIHC |
| TCGA-DD-AAD6 | MSS | LIHC |
| TCGA-DD-AAD8 | MSS | LIHC |
| TCGA-DD-AADA | MSS | LIHC |
| TCGA-DD-AADB | MSS | LIHC |
| TCGA-DD-AADC | MSS | LIHC |
| TCGA-DD-AADD | MSS | LIHC |
| TCGA-DD-AADE | MSS | LIHC |
| TCGA-DD-AADF | MSS | LIHC |
| TCGA-DD-AADG | MSS | LIHC |

|              |     |      |
|--------------|-----|------|
| TCGA-DD-AADI | MSS | LIHC |
| TCGA-DD-AADJ | MSS | LIHC |
| TCGA-DD-AADK | MSS | LIHC |
| TCGA-DD-AADL | MSS | LIHC |
| TCGA-DD-AADM | MSS | LIHC |
| TCGA-DD-AADN | MSS | LIHC |
| TCGA-DD-AADO | MSS | LIHC |
| TCGA-DD-AADP | MSS | LIHC |
| TCGA-DD-AADQ | MSS | LIHC |
| TCGA-DD-AADR | MSS | LIHC |
| TCGA-DD-AADS | MSS | LIHC |
| TCGA-DD-AADU | MSS | LIHC |
| TCGA-DD-AADV | MSS | LIHC |
| TCGA-DD-AADW | MSS | LIHC |
| TCGA-DD-AADY | MSS | LIHC |
| TCGA-DD-AAE0 | MSS | LIHC |
| TCGA-DD-AAE1 | MSS | LIHC |
| TCGA-DD-AAE2 | MSS | LIHC |
| TCGA-DD-AAE3 | MSS | LIHC |
| TCGA-DD-AAE4 | MSS | LIHC |
| TCGA-DD-AAE6 | MSS | LIHC |
| TCGA-DD-AAE7 | MSS | LIHC |
| TCGA-DD-AAE8 | MSS | LIHC |
| TCGA-DD-AAE9 | MSS | LIHC |
| TCGA-DD-AAEA | MSS | LIHC |
| TCGA-DD-AAEB | MSS | LIHC |
| TCGA-DD-AAED | MSS | LIHC |
| TCGA-DD-AAEE | MSS | LIHC |
| TCGA-DD-AAEG | MSS | LIHC |
| TCGA-DD-AAEH | MSS | LIHC |
| TCGA-DD-AAEI | MSS | LIHC |
| TCGA-DD-AAEK | MSS | LIHC |
| TCGA-DD-AAVP | MSS | LIHC |
| TCGA-DD-AAVQ | MSS | LIHC |
| TCGA-DD-AAVR | MSS | LIHC |
| TCGA-DD-AAVS | MSS | LIHC |
| TCGA-DD-AAVU | MSS | LIHC |
| TCGA-DD-AAVV | MSS | LIHC |
| TCGA-DD-AAVW | MSS | LIHC |
| TCGA-DD-AAVX | MSS | LIHC |
| TCGA-DD-AAVY | MSS | LIHC |
| TCGA-DD-AAVZ | MSS | LIHC |
| TCGA-DD-AAW0 | MSS | LIHC |
| TCGA-DD-AAW1 | MSS | LIHC |
| TCGA-DD-AAW2 | MSS | LIHC |
| TCGA-DD-AAW3 | MSS | LIHC |
| TCGA-DE-A0XZ | MSS | THCA |
| TCGA-DE-A0Y2 | MSS | THCA |
| TCGA-DE-A0Y3 | MSS | THCA |
| TCGA-DE-A2OL | MSS | THCA |
| TCGA-DE-A3KN | MSS | THCA |
| TCGA-DE-A4M8 | MSS | THCA |

|              |       |      |
|--------------|-------|------|
| TCGA-DE-A4M9 | MSS   | THCA |
| TCGA-DE-A4MA | MSS   | THCA |
| TCGA-DE-A4MB | MSS   | THCA |
| TCGA-DE-A4MC | MSS   | THCA |
| TCGA-DE-A4MD | MSS   | THCA |
| TCGA-DE-A4MD | MSS   | THCA |
| TCGA-DE-A69J | MSS   | THCA |
| TCGA-DE-A69K | MSS   | THCA |
| TCGA-DE-A7U5 | MSS   | THCA |
| TCGA-DF-A2KN | MSI-H | UCEC |
| TCGA-DF-A2KY | MSI-H | UCEC |
| TCGA-DF-A2KZ | MSI-H | UCEC |
| TCGA-DH-5140 | MSS   | LGG  |
| TCGA-DH-5141 | MSS   | LGG  |
| TCGA-DH-5142 | MSS   | LGG  |
| TCGA-DH-5143 | MSS   | LGG  |
| TCGA-DH-5144 | MSS   | LGG  |
| TCGA-DH-A669 | MSS   | LGG  |
| TCGA-DH-A669 | MSS   | LGG  |
| TCGA-DH-A66B | MSS   | LGG  |
| TCGA-DH-A66D | MSS   | LGG  |
| TCGA-DH-A66F | MSS   | LGG  |
| TCGA-DH-A66G | MSS   | LGG  |
| TCGA-DH-A7UR | MSS   | LGG  |
| TCGA-DH-A7US | MSS   | LGG  |
| TCGA-DH-A7UT | MSS   | LGG  |
| TCGA-DH-A7UU | MSS   | LGG  |
| TCGA-DH-A7UV | MSS   | LGG  |
| TCGA-DI-A0WH | MSI-H | UCEC |
| TCGA-DI-A1BU | MSI-H | UCEC |
| TCGA-DI-A1BY | MSS   | UCEC |
| TCGA-DI-A1C3 | MSS   | UCEC |
| TCGA-DI-A1NN | MSS   | UCEC |
| TCGA-DI-A1NO | MSS   | UCEC |
| TCGA-DI-A2QT | MSS   | UCEC |
| TCGA-DJ-A13L | MSS   | THCA |
| TCGA-DJ-A13M | MSS   | THCA |
| TCGA-DJ-A13O | MSS   | THCA |
| TCGA-DJ-A13P | MSS   | THCA |
| TCGA-DJ-A13R | MSS   | THCA |
| TCGA-DJ-A13S | MSS   | THCA |
| TCGA-DJ-A13T | MSS   | THCA |
| TCGA-DJ-A13U | MSS   | THCA |
| TCGA-DJ-A13V | MSS   | THCA |
| TCGA-DJ-A13W | MSS   | THCA |
| TCGA-DJ-A13X | MSS   | THCA |
| TCGA-DJ-A1QD | MSS   | THCA |
| TCGA-DJ-A1QE | MSS   | THCA |
| TCGA-DJ-A1QF | MSS   | THCA |
| TCGA-DJ-A1QG | MSS   | THCA |
| TCGA-DJ-A1QH | MSS   | THCA |
| TCGA-DJ-A1QI | MSS   | THCA |



|              |     |      |
|--------------|-----|------|
| TCGA-DJ-A1QL | MSS | THCA |
| TCGA-DJ-A1QM | MSS | THCA |
| TCGA-DJ-A1QN | MSS | THCA |
| TCGA-DJ-A1QO | MSS | THCA |
| TCGA-DJ-A1QQ | MSS | THCA |
| TCGA-DJ-A2PN | MSS | THCA |
| TCGA-DJ-A2PO | MSS | THCA |
| TCGA-DJ-A2PP | MSS | THCA |
| TCGA-DJ-A2PQ | MSS | THCA |
| TCGA-DJ-A2PR | MSS | THCA |
| TCGA-DJ-A2PS | MSS | THCA |
| TCGA-DJ-A2PT | MSS | THCA |
| TCGA-DJ-A2PU | MSS | THCA |
| TCGA-DJ-A2PV | MSS | THCA |
| TCGA-DJ-A2PW | MSS | THCA |
| TCGA-DJ-A2PX | MSS | THCA |
| TCGA-DJ-A2PY | MSS | THCA |
| TCGA-DJ-A2PZ | MSS | THCA |
| TCGA-DJ-A2Q0 | MSS | THCA |
| TCGA-DJ-A2Q1 | MSS | THCA |
| TCGA-DJ-A2Q2 | MSS | THCA |
| TCGA-DJ-A2Q3 | MSS | THCA |
| TCGA-DJ-A2Q4 | MSS | THCA |
| TCGA-DJ-A2Q5 | MSS | THCA |
| TCGA-DJ-A2Q6 | MSS | THCA |
| TCGA-DJ-A2Q7 | MSS | THCA |
| TCGA-DJ-A2Q8 | MSS | THCA |
| TCGA-DJ-A2Q9 | MSS | THCA |
| TCGA-DJ-A2QA | MSS | THCA |
| TCGA-DJ-A2QB | MSS | THCA |
| TCGA-DJ-A2QC | MSS | THCA |
| TCGA-DJ-A3UK | MSS | THCA |
| TCGA-DJ-A3UM | MSS | THCA |
| TCGA-DJ-A3UN | MSS | THCA |
| TCGA-DJ-A3UP | MSS | THCA |
| TCGA-DJ-A3UR | MSS | THCA |
| TCGA-DJ-A3US | MSS | THCA |
| TCGA-DJ-A3UT | MSS | THCA |
| TCGA-DJ-A3UU | MSS | THCA |
| TCGA-DJ-A3UW | MSS | THCA |
| TCGA-DJ-A3UX | MSS | THCA |
| TCGA-DJ-A3UZ | MSS | THCA |
| TCGA-DJ-A3V0 | MSS | THCA |
| TCGA-DJ-A3V2 | MSS | THCA |
| TCGA-DJ-A3V4 | MSS | THCA |
| TCGA-DJ-A3V5 | MSS | THCA |
| TCGA-DJ-A3V6 | MSS | THCA |
| TCGA-DJ-A3V7 | MSS | THCA |
| TCGA-DJ-A3V8 | MSS | THCA |
| TCGA-DJ-A3V9 | MSS | THCA |
| TCGA-DJ-A3VA | MSS | THCA |
| TCGA-DJ-A3VB | MSS | THCA |

|              |              |      |
|--------------|--------------|------|
| TCGA-DJ-A3VD | MSS          | THCA |
| TCGA-DJ-A3VE | MSS          | THCA |
| TCGA-DJ-A3VF | MSS          | THCA |
| TCGA-DJ-A3VG | MSS          | THCA |
| TCGA-DJ-A3VI | MSS          | THCA |
| TCGA-DJ-A3VJ | MSS          | THCA |
| TCGA-DJ-A3VK | MSS          | THCA |
| TCGA-DJ-A3VL | MSS          | THCA |
| TCGA-DJ-A3VM | MSS          | THCA |
| TCGA-DJ-A4UL | MSS          | THCA |
| TCGA-DJ-A4UP | MSS          | THCA |
| TCGA-DJ-A4UQ | MSS          | THCA |
| TCGA-DJ-A4UR | MSS          | THCA |
| TCGA-DJ-A4UT | MSS          | THCA |
| TCGA-DJ-A4UW | MSS          | THCA |
| TCGA-DJ-A4V0 | MSS          | THCA |
| TCGA-DJ-A4V2 | MSS          | THCA |
| TCGA-DJ-A4V4 | MSS          | THCA |
| TCGA-DJ-A4V5 | MSS          | THCA |
| TCGA-DK-A1A3 | MSS          | BLCA |
| TCGA-DK-A1A5 | MSS          | BLCA |
| TCGA-DK-A1A6 | Intermediate | BLCA |
| TCGA-DK-A1A6 | MSS          | BLCA |
| TCGA-DK-A1A7 | MSS          | BLCA |
| TCGA-DK-A1AA | MSS          | BLCA |
| TCGA-DK-A1AB | MSS          | BLCA |
| TCGA-DK-A1AC | MSS          | BLCA |
| TCGA-DK-A1AD | MSS          | BLCA |
| TCGA-DK-A1AE | MSS          | BLCA |
| TCGA-DK-A1AF | MSS          | BLCA |
| TCGA-DK-A1AG | MSS          | BLCA |
| TCGA-DK-A2HX | MSS          | BLCA |
| TCGA-DK-A2I1 | MSS          | BLCA |
| TCGA-DK-A2I2 | MSS          | BLCA |
| TCGA-DK-A2I6 | MSS          | BLCA |
| TCGA-DK-A3IM | MSS          | BLCA |
| TCGA-DK-A3IN | MSS          | BLCA |
| TCGA-DK-A3IT | MSS          | BLCA |
| TCGA-DK-A3IU | MSS          | BLCA |
| TCGA-DK-A3WW | MSS          | BLCA |
| TCGA-DK-A3WX | MSS          | BLCA |
| TCGA-DK-A3WY | MSS          | BLCA |
| TCGA-DK-A3X1 | MSS          | BLCA |
| TCGA-DK-A3X2 | MSS          | BLCA |
| TCGA-DK-A6AV | MSS          | BLCA |
| TCGA-DK-A6AW | MSS          | BLCA |
| TCGA-DK-A6B0 | MSS          | BLCA |
| TCGA-DK-A6B1 | MSS          | BLCA |
| TCGA-DK-A6B2 | MSS          | BLCA |
| TCGA-DK-A6B5 | MSS          | BLCA |
| TCGA-DK-A6B6 | MSS          | BLCA |
| TCGA-DK-AA6L | MSS          | BLCA |

|              |       |      |
|--------------|-------|------|
| TCGA-DK-AA6M | MSS   | BLCA |
| TCGA-DK-AA6P | MSS   | BLCA |
| TCGA-DK-AA6Q | MSS   | BLCA |
| TCGA-DK-AA6R | MSS   | BLCA |
| TCGA-DK-AA6S | MSS   | BLCA |
| TCGA-DK-AA6T | MSS   | BLCA |
| TCGA-DK-AA6U | MSS   | BLCA |
| TCGA-DK-AA6W | MSS   | BLCA |
| TCGA-DK-AA6X | MSS   | BLCA |
| TCGA-DK-AA71 | MSS   | BLCA |
| TCGA-DK-AA74 | MSS   | BLCA |
| TCGA-DK-AA75 | MSS   | BLCA |
| TCGA-DK-AA76 | MSS   | BLCA |
| TCGA-DK-AA77 | MSS   | BLCA |
| TCGA-DM-A0X9 | MSS   | COAD |
| TCGA-DM-A0XD | MSS   | COAD |
| TCGA-DM-A0XF | MSS   | COAD |
| TCGA-DM-A1D0 | MSS   | COAD |
| TCGA-DM-A1D4 | MSS   | COAD |
| TCGA-DM-A1D6 | MSS   | COAD |
| TCGA-DM-A1D7 | MSS   | COAD |
| TCGA-DM-A1D8 | MSS   | COAD |
| TCGA-DM-A1D9 | MSS   | COAD |
| TCGA-DM-A1DA | MSS   | COAD |
| TCGA-DM-A1DB | MSS   | COAD |
| TCGA-DM-A1HA | MSS   | COAD |
| TCGA-DM-A1HB | MSI-H | COAD |
| TCGA-DM-A280 | MSS   | COAD |
| TCGA-DM-A282 | MSS   | COAD |
| TCGA-DM-A285 | MSS   | COAD |
| TCGA-DM-A288 | MSS   | COAD |
| TCGA-DM-A28A | MSS   | COAD |
| TCGA-DM-A28C | MSS   | COAD |
| TCGA-DM-A28E | MSS   | COAD |
| TCGA-DM-A28F | MSS   | COAD |
| TCGA-DM-A28G | MSS   | COAD |
| TCGA-DM-A28H | MSS   | COAD |
| TCGA-DM-A28K | MSS   | COAD |
| TCGA-DM-A28M | MSS   | COAD |
| TCGA-DO-A1JZ | MSS   | THCA |
| TCGA-DO-A1K0 | MSS   | THCA |
| TCGA-DQ-5624 | MSS   | HNSC |
| TCGA-DQ-5625 | MSS   | HNSC |
| TCGA-DQ-5629 | MSS   | HNSC |
| TCGA-DQ-5630 | MSS   | HNSC |
| TCGA-DQ-5631 | MSS   | HNSC |
| TCGA-DQ-7588 | MSS   | HNSC |
| TCGA-DQ-7591 | MSS   | HNSC |
| TCGA-DQ-7592 | MSS   | HNSC |
| TCGA-DQ-7593 | MSS   | HNSC |
| TCGA-DQ-7596 | MSS   | HNSC |
| TCGA-DR-A0ZL | MSS   | CESC |

|              |       |      |
|--------------|-------|------|
| TCGA-DR-A0ZM | MSS   | CESC |
| TCGA-DS-A0VK | MSS   | CESC |
| TCGA-DS-A0VL | MSS   | CESC |
| TCGA-DS-A0VM | MSS   | CESC |
| TCGA-DS-A0VN | MSS   | CESC |
| TCGA-DS-A1OB | MSS   | CESC |
| TCGA-DS-A1OC | MSS   | CESC |
| TCGA-DS-A1OD | MSS   | CESC |
| TCGA-DS-A7WF | MSS   | CESC |
| TCGA-DS-A7WH | MSS   | CESC |
| TCGA-DS-A7WI | MSS   | CESC |
| TCGA-DT-5265 | MSS   | READ |
| TCGA-DU-5847 | MSS   | LGG  |
| TCGA-DU-5849 | MSS   | LGG  |
| TCGA-DU-5851 | MSS   | LGG  |
| TCGA-DU-5852 | MSS   | LGG  |
| TCGA-DU-5853 | MSS   | LGG  |
| TCGA-DU-5854 | MSS   | LGG  |
| TCGA-DU-5855 | MSS   | LGG  |
| TCGA-DU-5870 | MSS   | LGG  |
| TCGA-DU-5870 | MSS   | LGG  |
| TCGA-DU-5871 | MSS   | LGG  |
| TCGA-DU-5872 | MSS   | LGG  |
| TCGA-DU-5872 | MSS   | LGG  |
| TCGA-DU-5874 | MSS   | LGG  |
| TCGA-DU-6392 | MSI-H | LGG  |
| TCGA-DU-6393 | MSS   | LGG  |
| TCGA-DU-6394 | MSS   | LGG  |
| TCGA-DU-6395 | MSS   | LGG  |
| TCGA-DU-6396 | MSS   | LGG  |
| TCGA-DU-6397 | MSS   | LGG  |
| TCGA-DU-6397 | MSS   | LGG  |
| TCGA-DU-6399 | MSS   | LGG  |
| TCGA-DU-6400 | MSS   | LGG  |
| TCGA-DU-6401 | MSS   | LGG  |
| TCGA-DU-6402 | MSS   | LGG  |
| TCGA-DU-6403 | MSS   | LGG  |
| TCGA-DU-6404 | MSS   | LGG  |
| TCGA-DU-6405 | MSS   | LGG  |
| TCGA-DU-6406 | MSS   | LGG  |
| TCGA-DU-6407 | MSS   | LGG  |
| TCGA-DU-6407 | MSS   | LGG  |
| TCGA-DU-6407 | MSS   | LGG  |
| TCGA-DU-6408 | MSS   | LGG  |
| TCGA-DU-6410 | MSS   | LGG  |
| TCGA-DU-6542 | MSS   | LGG  |
| TCGA-DU-7006 | MSS   | LGG  |
| TCGA-DU-7007 | MSS   | LGG  |
| TCGA-DU-7008 | MSS   | LGG  |
| TCGA-DU-7009 | MSS   | LGG  |

|              |     |      |
|--------------|-----|------|
| TCGA-DU-7010 | MSS | LGG  |
| TCGA-DU-7011 | MSS | LGG  |
| TCGA-DU-7012 | MSS | LGG  |
| TCGA-DU-7013 | MSS | LGG  |
| TCGA-DU-7014 | MSS | LGG  |
| TCGA-DU-7015 | MSS | LGG  |
| TCGA-DU-7018 | MSS | LGG  |
| TCGA-DU-7019 | MSS | LGG  |
| TCGA-DU-7290 | MSS | LGG  |
| TCGA-DU-7292 | MSS | LGG  |
| TCGA-DU-7294 | MSS | LGG  |
| TCGA-DU-7298 | MSS | LGG  |
| TCGA-DU-7299 | MSS | LGG  |
| TCGA-DU-7300 | MSS | LGG  |
| TCGA-DU-7301 | MSS | LGG  |
| TCGA-DU-7302 | MSS | LGG  |
| TCGA-DU-7304 | MSS | LGG  |
| TCGA-DU-7304 | MSS | LGG  |
| TCGA-DU-7306 | MSS | LGG  |
| TCGA-DU-7309 | MSS | LGG  |
| TCGA-DU-8158 | MSS | LGG  |
| TCGA-DU-8161 | MSS | LGG  |
| TCGA-DU-8166 | MSS | LGG  |
| TCGA-DU-8167 | MSS | LGG  |
| TCGA-DU-8168 | MSS | LGG  |
| TCGA-DU-A5TP | MSS | LGG  |
| TCGA-DU-A5TR | MSS | LGG  |
| TCGA-DU-A5TS | MSS | LGG  |
| TCGA-DU-A5TT | MSS | LGG  |
| TCGA-DU-A5TU | MSS | LGG  |
| TCGA-DU-A5TW | MSS | LGG  |
| TCGA-DU-A5TY | MSS | LGG  |
| TCGA-DU-A6S2 | MSS | LGG  |
| TCGA-DU-A6S3 | MSS | LGG  |
| TCGA-DU-A6S6 | MSS | LGG  |
| TCGA-DU-A6S7 | MSS | LGG  |
| TCGA-DU-A6S8 | MSS | LGG  |
| TCGA-DU-A76K | MSS | LGG  |
| TCGA-DU-A76L | MSS | LGG  |
| TCGA-DU-A76R | MSS | LGG  |
| TCGA-DU-A7T6 | MSS | LGG  |
| TCGA-DU-A7T8 | MSS | LGG  |
| TCGA-DU-A7TA | MSS | LGG  |
| TCGA-DU-A7TB | MSS | LGG  |
| TCGA-DU-A7TC | MSS | LGG  |
| TCGA-DU-A7TD | MSS | LGG  |
| TCGA-DU-A7TG | MSS | LGG  |
| TCGA-DU-A7TI | MSS | LGG  |
| TCGA-DU-A7TJ | MSS | LGG  |
| TCGA-DV-5565 | MSS | KIRC |
| TCGA-DV-5566 | MSS | KIRC |
| TCGA-DV-5567 | MSS | KIRC |

|              |              |      |
|--------------|--------------|------|
| TCGA-DV-5568 | MSS          | KIRC |
| TCGA-DV-5569 | MSS          | KIRC |
| TCGA-DV-5573 | MSS          | KIRC |
| TCGA-DV-5574 | MSS          | KIRC |
| TCGA-DV-5575 | MSS          | KIRC |
| TCGA-DV-5576 | MSS          | KIRC |
| TCGA-DV-A4VZ | MSS          | KIRC |
| TCGA-DW-5560 | MSS          | KIRP |
| TCGA-DW-5561 | MSS          | KIRP |
| TCGA-DW-7834 | MSS          | KIRP |
| TCGA-DW-7836 | Intermediate | KIRP |
| TCGA-DW-7837 | MSS          | KIRP |
| TCGA-DW-7838 | MSS          | KIRP |
| TCGA-DW-7839 | MSS          | KIRP |
| TCGA-DW-7840 | MSS          | KIRP |
| TCGA-DW-7841 | MSS          | KIRP |
| TCGA-DW-7842 | MSS          | KIRP |
| TCGA-DX-A1KX | MSS          | SARC |
| TCGA-DX-A1KY | MSS          | SARC |
| TCGA-DX-A1L3 | MSS          | SARC |
| TCGA-DX-A23U | MSS          | SARC |
| TCGA-DX-A3M2 | MSS          | SARC |
| TCGA-DX-A3U6 | MSS          | SARC |
| TCGA-DX-A3U9 | MSS          | SARC |
| TCGA-DX-A3UA | MSS          | SARC |
| TCGA-DX-A3UB | MSS          | SARC |
| TCGA-DX-A3UC | MSS          | SARC |
| TCGA-DX-A3UD | MSS          | SARC |
| TCGA-DX-A3UE | MSS          | SARC |
| TCGA-DX-A3UF | MSS          | SARC |
| TCGA-DX-A48J | MSS          | SARC |
| TCGA-DX-A48K | MSS          | SARC |
| TCGA-DX-A48L | MSS          | SARC |
| TCGA-DX-A48N | MSS          | SARC |
| TCGA-DX-A48O | MSS          | SARC |
| TCGA-DX-A48P | MSS          | SARC |
| TCGA-DX-A48R | MSS          | SARC |
| TCGA-DX-A48U | MSS          | SARC |
| TCGA-DX-A48V | MSS          | SARC |
| TCGA-DX-A6B7 | MSS          | SARC |
| TCGA-DX-A6B8 | MSS          | SARC |
| TCGA-DX-A6B9 | MSS          | SARC |
| TCGA-DX-A6BA | MSS          | SARC |
| TCGA-DX-A6BB | MSS          | SARC |
| TCGA-DX-A6BE | MSS          | SARC |
| TCGA-DX-A6BF | MSS          | SARC |
| TCGA-DX-A6BG | MSS          | SARC |
| TCGA-DX-A6BH | MSS          | SARC |
| TCGA-DX-A6BK | MSS          | SARC |
| TCGA-DX-A6YQ | MSS          | SARC |
| TCGA-DX-A6YR | MSS          | SARC |
| TCGA-DX-A6YS | MSS          | SARC |

|              |     |      |
|--------------|-----|------|
| TCGA-DX-A6YU | MSS | SARC |
| TCGA-DX-A6YV | MSS | SARC |
| TCGA-DX-A6YX | MSS | SARC |
| TCGA-DX-A6YZ | MSS | SARC |
| TCGA-DX-A6Z0 | MSS | SARC |
| TCGA-DX-A6Z2 | MSS | SARC |
| TCGA-DX-A7EF | MSS | SARC |
| TCGA-DX-A7EI | MSS | SARC |
| TCGA-DX-A7EL | MSS | SARC |
| TCGA-DX-A7EM | MSS | SARC |
| TCGA-DX-A7EN | MSS | SARC |
| TCGA-DX-A7EO | MSS | SARC |
| TCGA-DX-A7EQ | MSS | SARC |
| TCGA-DX-A7ER | MSS | SARC |
| TCGA-DX-A7ES | MSS | SARC |
| TCGA-DX-A7ET | MSS | SARC |
| TCGA-DX-A7EU | MSS | SARC |
| TCGA-DX-A8BG | MSS | SARC |
| TCGA-DX-A8BJ | MSS | SARC |
| TCGA-DX-A8BL | MSS | SARC |
| TCGA-DX-A8BM | MSS | SARC |
| TCGA-DX-A8BN | MSS | SARC |
| TCGA-DX-A8BO | MSS | SARC |
| TCGA-DX-A8BP | MSS | SARC |
| TCGA-DX-A8BR | MSS | SARC |
| TCGA-DX-A8BT | MSS | SARC |
| TCGA-DX-A8BU | MSS | SARC |
| TCGA-DX-A8BV | MSS | SARC |
| TCGA-DX-A8BX | MSS | SARC |
| TCGA-DX-A8BZ | MSS | SARC |
| TCGA-DX-AATS | MSS | SARC |
| TCGA-DX-AB2E | MSS | SARC |
| TCGA-DX-AB2F | MSS | SARC |
| TCGA-DX-AB2G | MSS | SARC |
| TCGA-DX-AB2H | MSS | SARC |
| TCGA-DX-AB2J | MSS | SARC |
| TCGA-DX-AB2L | MSS | SARC |
| TCGA-DX-AB2O | MSS | SARC |
| TCGA-DX-AB2P | MSS | SARC |
| TCGA-DX-AB2Q | MSS | SARC |
| TCGA-DX-AB2S | MSS | SARC |
| TCGA-DX-AB2T | MSS | SARC |
| TCGA-DX-AB2V | MSS | SARC |
| TCGA-DX-AB2W | MSS | SARC |
| TCGA-DX-AB2X | MSS | SARC |
| TCGA-DX-AB2Z | MSS | SARC |
| TCGA-DX-AB30 | MSS | SARC |
| TCGA-DX-AB32 | MSS | SARC |
| TCGA-DX-AB35 | MSS | SARC |
| TCGA-DX-AB36 | MSS | SARC |
| TCGA-DX-AB37 | MSS | SARC |
| TCGA-DX-AB3A | MSS | SARC |

|              |     |      |
|--------------|-----|------|
| TCGA-DX-AB3B | MSS | SARC |
| TCGA-DX-AB3C | MSS | SARC |
| TCGA-DY-A0XA | MSS | READ |
| TCGA-DY-A1DC | MSS | READ |
| TCGA-DY-A1DD | MSS | READ |
| TCGA-DY-A1DF | MSS | READ |
| TCGA-DY-A1DG | MSS | READ |
| TCGA-DY-A1H8 | MSS | READ |
| TCGA-DZ-6131 | MSS | KIRP |
| TCGA-DZ-6132 | MSS | KIRP |
| TCGA-DZ-6133 | MSS | KIRP |
| TCGA-DZ-6134 | MSS | KIRP |
| TCGA-DZ-6135 | MSS | KIRP |
| TCGA-E1-5302 | MSS | LGG  |
| TCGA-E1-5303 | MSS | LGG  |
| TCGA-E1-5304 | MSS | LGG  |
| TCGA-E1-5305 | MSS | LGG  |
| TCGA-E1-5307 | MSS | LGG  |
| TCGA-E1-5311 | MSS | LGG  |
| TCGA-E1-5318 | MSS | LGG  |
| TCGA-E1-5319 | MSS | LGG  |
| TCGA-E1-5322 | MSS | LGG  |
| TCGA-E1-A7YD | MSS | LGG  |
| TCGA-E1-A7YE | MSS | LGG  |
| TCGA-E1-A7YH | MSS | LGG  |
| TCGA-E1-A7YI | MSS | LGG  |
| TCGA-E1-A7YJ | MSS | LGG  |
| TCGA-E1-A7YK | MSS | LGG  |
| TCGA-E1-A7YL | MSS | LGG  |
| TCGA-E1-A7YM | MSS | LGG  |
| TCGA-E1-A7YN | MSS | LGG  |
| TCGA-E1-A7YO | MSS | LGG  |
| TCGA-E1-A7YQ | MSS | LGG  |
| TCGA-E1-A7YS | MSS | LGG  |
| TCGA-E1-A7YU | MSS | LGG  |
| TCGA-E1-A7YV | MSS | LGG  |
| TCGA-E1-A7YW | MSS | LGG  |
| TCGA-E1-A7YY | MSS | LGG  |
| TCGA-E1-A7Z2 | MSS | LGG  |
| TCGA-E1-A7Z3 | MSS | LGG  |
| TCGA-E1-A7Z4 | MSS | LGG  |
| TCGA-E1-A7Z6 | MSS | LGG  |
| TCGA-E2-A10A | MSS | BRCA |
| TCGA-E2-A10C | MSS | BRCA |
| TCGA-E2-A14N | MSS | BRCA |
| TCGA-E2-A14P | MSS | BRCA |
| TCGA-E2-A14Q | MSS | BRCA |
| TCGA-E2-A14R | MSS | BRCA |
| TCGA-E2-A14S | MSS | BRCA |
| TCGA-E2-A14T | MSS | BRCA |
| TCGA-E2-A14V | MSS | BRCA |
| TCGA-E2-A14W | MSS | BRCA |



|              |              |      |
|--------------|--------------|------|
| TCGA-E2-A14X | MSS          | BRCA |
| TCGA-E2-A14Y | MSS          | BRCA |
| TCGA-E2-A14Z | MSS          | BRCA |
| TCGA-E2-A150 | MSS          | BRCA |
| TCGA-E2-A152 | MSS          | BRCA |
| TCGA-E2-A153 | MSS          | BRCA |
| TCGA-E2-A154 | MSS          | BRCA |
| TCGA-E2-A155 | MSS          | BRCA |
| TCGA-E2-A156 | MSS          | BRCA |
| TCGA-E2-A158 | MSS          | BRCA |
| TCGA-E2-A159 | MSS          | BRCA |
| TCGA-E2-A15A | MSS          | BRCA |
| TCGA-E2-A15A | MSS          | BRCA |
| TCGA-E2-A15C | MSS          | BRCA |
| TCGA-E2-A15D | MSS          | BRCA |
| TCGA-E2-A15E | MSS          | BRCA |
| TCGA-E2-A15E | MSS          | BRCA |
| TCGA-E2-A15G | MSS          | BRCA |
| TCGA-E2-A15H | MSS          | BRCA |
| TCGA-E2-A15I | MSS          | BRCA |
| TCGA-E2-A15J | MSS          | BRCA |
| TCGA-E2-A15K | MSS          | BRCA |
| TCGA-E2-A15K | MSS          | BRCA |
| TCGA-E2-A15L | MSS          | BRCA |
| TCGA-E2-A15M | MSS          | BRCA |
| TCGA-E2-A15O | MSS          | BRCA |
| TCGA-E2-A15P | MSS          | BRCA |
| TCGA-E2-A15R | MSS          | BRCA |
| TCGA-E2-A15S | Intermediate | BRCA |
| TCGA-E2-A15T | MSS          | BRCA |
| TCGA-E2-A1AZ | MSS          | BRCA |
| TCGA-E2-A1B0 | MSS          | BRCA |
| TCGA-E2-A1B1 | MSS          | BRCA |
| TCGA-E2-A1B4 | MSS          | BRCA |
| TCGA-E2-A1B5 | MSS          | BRCA |
| TCGA-E2-A1B6 | MSS          | BRCA |
| TCGA-E2-A1BC | MSS          | BRCA |
| TCGA-E2-A1BD | MSS          | BRCA |
| TCGA-E2-A1IE | MSS          | BRCA |
| TCGA-E2-A1IF | Intermediate | BRCA |
| TCGA-E2-A1IG | MSS          | BRCA |
| TCGA-E2-A1IH | MSS          | BRCA |
| TCGA-E2-A1II | MSI-H        | BRCA |
| TCGA-E2-A1IJ | MSI-H        | BRCA |
| TCGA-E2-A1IK | MSS          | BRCA |
| TCGA-E2-A1IL | MSI-H        | BRCA |
| TCGA-E2-A1IN | MSI-H        | BRCA |
| TCGA-E2-A1IO | MSI-H        | BRCA |
| TCGA-E2-A1IU | MSI-H        | BRCA |
| TCGA-E2-A1L6 | MSS          | BRCA |
| TCGA-E2-A1L7 | MSS          | BRCA |
| TCGA-E2-A1L8 | MSS          | BRCA |

|              |              |      |
|--------------|--------------|------|
| TCGA-E2-A1L9 | MSI-H        | BRCA |
| TCGA-E2-A1LB | Intermediate | BRCA |
| TCGA-E2-A1LG | MSS          | BRCA |
| TCGA-E2-A1LH | MSS          | BRCA |
| TCGA-E2-A1LI | Intermediate | BRCA |
| TCGA-E2-A1LK | MSI-H        | BRCA |
| TCGA-E2-A1LL | Intermediate | BRCA |
| TCGA-E2-A1LS | MSI-H        | BRCA |
| TCGA-E2-A56Z | MSS          | BRCA |
| TCGA-E2-A570 | MSS          | BRCA |
| TCGA-E2-A572 | MSS          | BRCA |
| TCGA-E2-A573 | MSS          | BRCA |
| TCGA-E2-A576 | MSS          | BRCA |
| TCGA-E2-A9RU | MSS          | BRCA |
| TCGA-E3-A3DY | MSS          | THCA |
| TCGA-E3-A3DZ | MSS          | THCA |
| TCGA-E3-A3E0 | MSS          | THCA |
| TCGA-E3-A3E1 | MSS          | THCA |
| TCGA-E3-A3E5 | MSS          | THCA |
| TCGA-E5-A2PC | MSS          | BLCA |
| TCGA-E5-A4TZ | MSS          | BLCA |
| TCGA-E5-A4U1 | MSS          | BLCA |
| TCGA-E6-A1LX | Intermediate | UCEC |
| TCGA-E6-A1LZ | MSS          | UCEC |
| TCGA-E6-A2P8 | MSI-H        | UCEC |
| TCGA-E6-A2P9 | MSI-H        | UCEC |
| TCGA-E6-A8L9 | MSS          | UCEC |
| TCGA-E7-A3X6 | MSS          | BLCA |
| TCGA-E7-A3Y1 | MSS          | BLCA |
| TCGA-E7-A4XJ | MSS          | BLCA |
| TCGA-E7-A5KE | MSS          | BLCA |
| TCGA-E7-A5KF | MSS          | BLCA |
| TCGA-E7-A677 | MSS          | BLCA |
| TCGA-E7-A678 | MSS          | BLCA |
| TCGA-E7-A6MD | MSS          | BLCA |
| TCGA-E7-A6ME | MSS          | BLCA |
| TCGA-E7-A6MF | MSS          | BLCA |
| TCGA-E7-A7DU | MSS          | BLCA |
| TCGA-E7-A7DV | MSS          | BLCA |
| TCGA-E7-A7PW | MSS          | BLCA |
| TCGA-E7-A7XN | MSS          | BLCA |
| TCGA-E7-A85H | MSS          | BLCA |
| TCGA-E7-A8O7 | MSS          | BLCA |
| TCGA-E7-A8O8 | MSS          | BLCA |
| TCGA-E7-A97P | MSS          | BLCA |
| TCGA-E7-A97Q | MSS          | BLCA |
| TCGA-E8-A242 | MSS          | THCA |
| TCGA-E8-A2EA | MSS          | THCA |
| TCGA-E8-A2JQ | MSS          | THCA |
| TCGA-E8-A3X7 | MSS          | THCA |
| TCGA-E8-A413 | MSS          | THCA |
| TCGA-E8-A414 | MSS          | THCA |

|              |              |      |
|--------------|--------------|------|
| TCGA-E8-A415 | MSS          | THCA |
| TCGA-E8-A416 | MSS          | THCA |
| TCGA-E8-A417 | MSS          | THCA |
| TCGA-E8-A418 | MSS          | THCA |
| TCGA-E8-A419 | MSS          | THCA |
| TCGA-E8-A432 | MSS          | THCA |
| TCGA-E8-A433 | MSS          | THCA |
| TCGA-E8-A434 | MSS          | THCA |
| TCGA-E8-A44K | MSS          | THCA |
| TCGA-E8-A44M | MSS          | THCA |
| TCGA-E9-A1N3 | MSS          | BRCA |
| TCGA-E9-A1N4 | MSS          | BRCA |
| TCGA-E9-A1N5 | Intermediate | BRCA |
| TCGA-E9-A1N8 | MSI-H        | BRCA |
| TCGA-E9-A1N9 | MSS          | BRCA |
| TCGA-E9-A1NA | MSI-H        | BRCA |
| TCGA-E9-A1NC | MSS          | BRCA |
| TCGA-E9-A1ND | MSS          | BRCA |
| TCGA-E9-A1NE | MSS          | BRCA |
| TCGA-E9-A1NF | MSI-H        | BRCA |
| TCGA-E9-A1NG | MSS          | BRCA |
| TCGA-E9-A1NH | MSS          | BRCA |
| TCGA-E9-A1NI | MSI-H        | BRCA |
| TCGA-E9-A1QZ | MSS          | BRCA |
| TCGA-E9-A1R0 | MSS          | BRCA |
| TCGA-E9-A1R2 | MSS          | BRCA |
| TCGA-E9-A1R3 | MSS          | BRCA |
| TCGA-E9-A1R4 | MSS          | BRCA |
| TCGA-E9-A1R5 | MSS          | BRCA |
| TCGA-E9-A1R6 | MSS          | BRCA |
| TCGA-E9-A1R7 | MSI-H        | BRCA |
| TCGA-E9-A1RA | MSS          | BRCA |
| TCGA-E9-A1RB | MSS          | BRCA |
| TCGA-E9-A1RC | MSS          | BRCA |
| TCGA-E9-A1RD | MSS          | BRCA |
| TCGA-E9-A1RE | MSI-H        | BRCA |
| TCGA-E9-A1RF | Intermediate | BRCA |
| TCGA-E9-A1RG | MSS          | BRCA |
| TCGA-E9-A1RH | MSS          | BRCA |
| TCGA-E9-A1RI | MSS          | BRCA |
| TCGA-E9-A226 | MSS          | BRCA |
| TCGA-E9-A227 | MSS          | BRCA |
| TCGA-E9-A228 | Intermediate | BRCA |
| TCGA-E9-A229 | MSS          | BRCA |
| TCGA-E9-A22A | MSS          | BRCA |
| TCGA-E9-A22B | MSS          | BRCA |
| TCGA-E9-A22D | MSS          | BRCA |
| TCGA-E9-A22E | MSI-H        | BRCA |
| TCGA-E9-A22G | MSS          | BRCA |
| TCGA-E9-A22H | MSS          | BRCA |
| TCGA-E9-A243 | MSS          | BRCA |
| TCGA-E9-A244 | Intermediate | BRCA |

|              |              |      |
|--------------|--------------|------|
| TCGA-E9-A245 | MSS          | BRCA |
| TCGA-E9-A247 | MSI-H        | BRCA |
| TCGA-E9-A248 | MSS          | BRCA |
| TCGA-E9-A249 | Intermediate | BRCA |
| TCGA-E9-A24A | MSS          | BRCA |
| TCGA-E9-A295 | MSS          | BRCA |
| TCGA-E9-A2JS | MSS          | BRCA |
| TCGA-E9-A2JT | MSS          | BRCA |
| TCGA-E9-A3Q9 | MSS          | BRCA |
| TCGA-E9-A3X8 | MSS          | BRCA |
| TCGA-E9-A5FL | MSS          | BRCA |
| TCGA-E9-A6HE | MSS          | BRCA |
| TCGA-EA-A1QS | MSS          | CESC |
| TCGA-EA-A1QT | MSS          | CESC |
| TCGA-EA-A3Y4 | MSS          | CESC |
| TCGA-EA-A410 | MSI-H        | CESC |
| TCGA-EA-A44S | MSS          | CESC |
| TCGA-EA-A556 | MSS          | CESC |
| TCGA-EA-A6QX | MSS          | CESC |
| TCGA-EA-A78R | MSS          | CESC |
| TCGA-EA-A97N | MSS          | CESC |
| TCGA-EB-A1NK | MSS          | SKCM |
| TCGA-EB-A24C | MSS          | SKCM |
| TCGA-EB-A24D | MSS          | SKCM |
| TCGA-EB-A299 | MSS          | SKCM |
| TCGA-EB-A3HV | MSS          | SKCM |
| TCGA-EB-A3XB | MSS          | SKCM |
| TCGA-EB-A3XC | MSS          | SKCM |
| TCGA-EB-A3XD | MSS          | SKCM |
| TCGA-EB-A3XE | MSS          | SKCM |
| TCGA-EB-A3XF | MSS          | SKCM |
| TCGA-EB-A3Y6 | MSS          | SKCM |
| TCGA-EB-A3Y7 | MSS          | SKCM |
| TCGA-EB-A41A | MSS          | SKCM |
| TCGA-EB-A41B | MSS          | SKCM |
| TCGA-EB-A42Y | MSS          | SKCM |
| TCGA-EB-A42Z | MSS          | SKCM |
| TCGA-EB-A430 | MSS          | SKCM |
| TCGA-EB-A431 | MSS          | SKCM |
| TCGA-EB-A44N | MSS          | SKCM |
| TCGA-EB-A44O | MSS          | SKCM |
| TCGA-EB-A44P | Intermediate | SKCM |
| TCGA-EB-A44Q | MSS          | SKCM |
| TCGA-EB-A4IQ | MSS          | SKCM |
| TCGA-EB-A4IS | MSS          | SKCM |
| TCGA-EB-A4OY | MSS          | SKCM |
| TCGA-EB-A4P0 | MSS          | SKCM |
| TCGA-EB-A4XL | MSS          | SKCM |
| TCGA-EB-A51B | MSS          | SKCM |
| TCGA-EB-A550 | MSS          | SKCM |
| TCGA-EB-A551 | MSS          | SKCM |
| TCGA-EB-A553 | MSS          | SKCM |

|              |       |      |
|--------------|-------|------|
| TCGA-EB-A57M | MSS   | SKCM |
| TCGA-EB-A5FP | MSS   | SKCM |
| TCGA-EB-A5KH | MSS   | SKCM |
| TCGA-EB-A5SE | MSS   | SKCM |
| TCGA-EB-A5SF | MSS   | SKCM |
| TCGA-EB-A5SG | MSS   | SKCM |
| TCGA-EB-A5SH | MSS   | SKCM |
| TCGA-EB-A5UL | MSS   | SKCM |
| TCGA-EB-A5UM | MSS   | SKCM |
| TCGA-EB-A5UN | MSS   | SKCM |
| TCGA-EB-A5VU | MSS   | SKCM |
| TCGA-EB-A5VV | MSS   | SKCM |
| TCGA-EB-A6L9 | MSS   | SKCM |
| TCGA-EB-A6QY | MSS   | SKCM |
| TCGA-EB-A6QZ | MSS   | SKCM |
| TCGA-EB-A6R0 | MSS   | SKCM |
| TCGA-EB-A82B | MSS   | SKCM |
| TCGA-EB-A82C | MSS   | SKCM |
| TCGA-EB-A85I | MSS   | SKCM |
| TCGA-EB-A85J | MSS   | SKCM |
| TCGA-EB-A97M | MSS   | SKCM |
| TCGA-EC-A1QX | MSI-H | UCEC |
| TCGA-EC-A24G | MSI-H | UCEC |
| TCGA-ED-A627 | MSS   | LIHC |
| TCGA-ED-A66X | MSS   | LIHC |
| TCGA-ED-A66Y | MSS   | LIHC |
| TCGA-ED-A7PX | MSS   | LIHC |
| TCGA-ED-A7PY | MSS   | LIHC |
| TCGA-ED-A7PZ | MSS   | LIHC |
| TCGA-ED-A7XO | MSS   | LIHC |
| TCGA-ED-A7XP | MSS   | LIHC |
| TCGA-ED-A82E | MSS   | LIHC |
| TCGA-ED-A805 | MSS   | LIHC |
| TCGA-ED-A806 | MSS   | LIHC |
| TCGA-ED-A97K | MSS   | LIHC |
| TCGA-EE-A17X | MSS   | SKCM |
| TCGA-EE-A17Y | MSS   | SKCM |
| TCGA-EE-A17Z | MSS   | SKCM |
| TCGA-EE-A180 | MSS   | SKCM |
| TCGA-EE-A181 | MSS   | SKCM |
| TCGA-EE-A182 | MSS   | SKCM |
| TCGA-EE-A183 | MSS   | SKCM |
| TCGA-EE-A184 | MSS   | SKCM |
| TCGA-EE-A185 | MSS   | SKCM |
| TCGA-EE-A20B | MSS   | SKCM |
| TCGA-EE-A20C | MSS   | SKCM |
| TCGA-EE-A20F | MSS   | SKCM |
| TCGA-EE-A20H | MSS   | SKCM |
| TCGA-EE-A20I | MSS   | SKCM |
| TCGA-EE-A29A | MSS   | SKCM |
| TCGA-EE-A29B | MSS   | SKCM |
| TCGA-EE-A29C | MSS   | SKCM |

|              |     |      |
|--------------|-----|------|
| TCGA-EE-A29D | MSS | SKCM |
| TCGA-EE-A29E | MSS | SKCM |
| TCGA-EE-A29G | MSS | SKCM |
| TCGA-EE-A29H | MSS | SKCM |
| TCGA-EE-A29L | MSS | SKCM |
| TCGA-EE-A29M | MSS | SKCM |
| TCGA-EE-A29N | MSS | SKCM |
| TCGA-EE-A29P | MSS | SKCM |
| TCGA-EE-A29Q | MSS | SKCM |
| TCGA-EE-A29R | MSS | SKCM |
| TCGA-EE-A29S | MSS | SKCM |
| TCGA-EE-A29T | MSS | SKCM |
| TCGA-EE-A29V | MSS | SKCM |
| TCGA-EE-A29W | MSS | SKCM |
| TCGA-EE-A29X | MSS | SKCM |
| TCGA-EE-A2A0 | MSS | SKCM |
| TCGA-EE-A2A1 | MSS | SKCM |
| TCGA-EE-A2A2 | MSS | SKCM |
| TCGA-EE-A2A5 | MSS | SKCM |
| TCGA-EE-A2A6 | MSS | SKCM |
| TCGA-EE-A2GB | MSS | SKCM |
| TCGA-EE-A2GC | MSS | SKCM |
| TCGA-EE-A2GD | MSS | SKCM |
| TCGA-EE-A2GE | MSS | SKCM |
| TCGA-EE-A2GH | MSS | SKCM |
| TCGA-EE-A2GI | MSS | SKCM |
| TCGA-EE-A2GJ | MSS | SKCM |
| TCGA-EE-A2GK | MSS | SKCM |
| TCGA-EE-A2GL | MSS | SKCM |
| TCGA-EE-A2GM | MSS | SKCM |
| TCGA-EE-A2GN | MSS | SKCM |
| TCGA-EE-A2GO | MSS | SKCM |
| TCGA-EE-A2GP | MSS | SKCM |
| TCGA-EE-A2GR | MSS | SKCM |
| TCGA-EE-A2GS | MSS | SKCM |
| TCGA-EE-A2GT | MSS | SKCM |
| TCGA-EE-A2GU | MSS | SKCM |
| TCGA-EE-A2M5 | MSS | SKCM |
| TCGA-EE-A2M6 | MSS | SKCM |
| TCGA-EE-A2M7 | MSS | SKCM |
| TCGA-EE-A2M8 | MSS | SKCM |
| TCGA-EE-A2MC | MSS | SKCM |
| TCGA-EE-A2MD | MSS | SKCM |
| TCGA-EE-A2ME | MSS | SKCM |
| TCGA-EE-A2MG | MSS | SKCM |
| TCGA-EE-A2MH | MSS | SKCM |
| TCGA-EE-A2MJ | MSS | SKCM |
| TCGA-EE-A2MK | MSS | SKCM |
| TCGA-EE-A2ML | MSS | SKCM |
| TCGA-EE-A2MM | MSS | SKCM |
| TCGA-EE-A2MN | MSS | SKCM |
| TCGA-EE-A2MP | MSS | SKCM |

|              |       |      |
|--------------|-------|------|
| TCGA-EE-A2MQ | MSS   | SKCM |
| TCGA-EE-A2MS | MSS   | SKCM |
| TCGA-EE-A2MT | MSS   | SKCM |
| TCGA-EE-A2MU | MSS   | SKCM |
| TCGA-EE-A3AA | MSS   | SKCM |
| TCGA-EE-A3AB | MSS   | SKCM |
| TCGA-EE-A3AC | MSS   | SKCM |
| TCGA-EE-A3AD | MSS   | SKCM |
| TCGA-EE-A3AE | MSS   | SKCM |
| TCGA-EE-A3AF | MSS   | SKCM |
| TCGA-EE-A3AH | MSS   | SKCM |
| TCGA-EE-A3J3 | MSS   | SKCM |
| TCGA-EE-A3J4 | MSS   | SKCM |
| TCGA-EE-A3J5 | MSS   | SKCM |
| TCGA-EE-A3J8 | MSS   | SKCM |
| TCGA-EE-A3JB | MSS   | SKCM |
| TCGA-EE-A3JD | MSS   | SKCM |
| TCGA-EE-A3JE | MSS   | SKCM |
| TCGA-EE-A3JI | MSS   | SKCM |
| TCGA-EF-5830 | MSS   | READ |
| TCGA-EI-6506 | MSS   | READ |
| TCGA-EI-6507 | MSI-H | READ |
| TCGA-EI-6508 | MSS   | READ |
| TCGA-EI-6509 | MSS   | READ |
| TCGA-EI-6510 | MSS   | READ |
| TCGA-EI-6511 | MSS   | READ |
| TCGA-EI-6512 | MSS   | READ |
| TCGA-EI-6513 | MSS   | READ |
| TCGA-EI-6514 | MSS   | READ |
| TCGA-EI-6881 | MSS   | READ |
| TCGA-EI-6882 | MSI-H | READ |
| TCGA-EI-6883 | MSS   | READ |
| TCGA-EI-6884 | MSS   | READ |
| TCGA-EI-6885 | MSS   | READ |
| TCGA-EI-6917 | MSS   | READ |
| TCGA-EI-7002 | MSS   | READ |
| TCGA-EI-7004 | MSS   | READ |
| TCGA-EJ-5494 | MSS   | PRAD |
| TCGA-EJ-5495 | MSS   | PRAD |
| TCGA-EJ-5496 | MSS   | PRAD |
| TCGA-EJ-5497 | MSS   | PRAD |
| TCGA-EJ-5498 | MSS   | PRAD |
| TCGA-EJ-5499 | MSS   | PRAD |
| TCGA-EJ-5501 | MSS   | PRAD |
| TCGA-EJ-5502 | MSS   | PRAD |
| TCGA-EJ-5503 | MSS   | PRAD |
| TCGA-EJ-5504 | MSS   | PRAD |
| TCGA-EJ-5505 | MSS   | PRAD |
| TCGA-EJ-5506 | MSS   | PRAD |
| TCGA-EJ-5507 | MSS   | PRAD |
| TCGA-EJ-5508 | MSS   | PRAD |
| TCGA-EJ-5509 | MSS   | PRAD |

|              |       |      |
|--------------|-------|------|
| TCGA-EJ-5510 | MSS   | PRAD |
| TCGA-EJ-5511 | MSS   | PRAD |
| TCGA-EJ-5512 | MSS   | PRAD |
| TCGA-EJ-5514 | MSS   | PRAD |
| TCGA-EJ-5515 | MSS   | PRAD |
| TCGA-EJ-5516 | MSS   | PRAD |
| TCGA-EJ-5517 | MSS   | PRAD |
| TCGA-EJ-5518 | MSS   | PRAD |
| TCGA-EJ-5519 | MSS   | PRAD |
| TCGA-EJ-5521 | MSS   | PRAD |
| TCGA-EJ-5522 | MSS   | PRAD |
| TCGA-EJ-5524 | MSS   | PRAD |
| TCGA-EJ-5525 | MSS   | PRAD |
| TCGA-EJ-5526 | MSS   | PRAD |
| TCGA-EJ-5527 | MSS   | PRAD |
| TCGA-EJ-5530 | MSS   | PRAD |
| TCGA-EJ-5531 | MSS   | PRAD |
| TCGA-EJ-5532 | MSS   | PRAD |
| TCGA-EJ-5542 | MSS   | PRAD |
| TCGA-EJ-7115 | MSS   | PRAD |
| TCGA-EJ-7123 | MSS   | PRAD |
| TCGA-EJ-7125 | MSS   | PRAD |
| TCGA-EJ-7218 | MSS   | PRAD |
| TCGA-EJ-7312 | MSS   | PRAD |
| TCGA-EJ-7314 | MSS   | PRAD |
| TCGA-EJ-7315 | MSS   | PRAD |
| TCGA-EJ-7318 | MSS   | PRAD |
| TCGA-EJ-7325 | MSS   | PRAD |
| TCGA-EJ-7327 | MSS   | PRAD |
| TCGA-EJ-7328 | MSS   | PRAD |
| TCGA-EJ-7330 | MSS   | PRAD |
| TCGA-EJ-7331 | MSS   | PRAD |
| TCGA-EJ-7781 | MSS   | PRAD |
| TCGA-EJ-7782 | MSI-H | PRAD |
| TCGA-EJ-7783 | MSS   | PRAD |
| TCGA-EJ-7784 | MSS   | PRAD |
| TCGA-EJ-7785 | MSS   | PRAD |
| TCGA-EJ-7786 | MSS   | PRAD |
| TCGA-EJ-7789 | MSS   | PRAD |
| TCGA-EJ-7791 | MSS   | PRAD |
| TCGA-EJ-7792 | MSS   | PRAD |
| TCGA-EJ-8468 | MSS   | PRAD |
| TCGA-EJ-8469 | MSS   | PRAD |
| TCGA-EJ-8470 | MSS   | PRAD |
| TCGA-EJ-8472 | MSS   | PRAD |
| TCGA-EJ-8474 | MSS   | PRAD |
| TCGA-EJ-A46B | MSS   | PRAD |
| TCGA-EJ-A46D | MSS   | PRAD |
| TCGA-EJ-A46E | MSS   | PRAD |
| TCGA-EJ-A46F | MSS   | PRAD |
| TCGA-EJ-A65B | MSS   | PRAD |
| TCGA-EJ-A65D | MSS   | PRAD |



|              |     |      |
|--------------|-----|------|
| TCGA-EJ-A65E | MSS | PRAD |
| TCGA-EJ-A65F | MSS | PRAD |
| TCGA-EJ-A65G | MSS | PRAD |
| TCGA-EJ-A65J | MSS | PRAD |
| TCGA-EJ-A65M | MSS | PRAD |
| TCGA-EJ-A6RA | MSS | PRAD |
| TCGA-EJ-A6RC | MSS | PRAD |
| TCGA-EJ-A7NF | MSS | PRAD |
| TCGA-EJ-A7NG | MSS | PRAD |
| TCGA-EJ-A7NH | MSS | PRAD |
| TCGA-EJ-A7NJ | MSS | PRAD |
| TCGA-EJ-A7NK | MSS | PRAD |
| TCGA-EJ-A7NM | MSS | PRAD |
| TCGA-EJ-A7NN | MSS | PRAD |
| TCGA-EJ-A8FN | MSS | PRAD |
| TCGA-EJ-A8FO | MSS | PRAD |
| TCGA-EJ-A8FP | MSS | PRAD |
| TCGA-EJ-A8FS | MSS | PRAD |
| TCGA-EJ-A8FU | MSS | PRAD |
| TCGA-EJ-AB20 | MSS | PRAD |
| TCGA-EJ-AB27 | MSS | PRAD |
| TCGA-EK-A2H1 | MSS | CESC |
| TCGA-EK-A2RC | MSS | CESC |
| TCGA-EK-A2RM | MSS | CESC |
| TCGA-EL-A3CL | MSS | THCA |
| TCGA-EL-A3CM | MSS | THCA |
| TCGA-EL-A3CN | MSS | THCA |
| TCGA-EL-A3CO | MSS | THCA |
| TCGA-EL-A3CP | MSS | THCA |
| TCGA-EL-A3CR | MSS | THCA |
| TCGA-EL-A3CS | MSS | THCA |
| TCGA-EL-A3CT | MSS | THCA |
| TCGA-EL-A3CU | MSS | THCA |
| TCGA-EL-A3CV | MSS | THCA |
| TCGA-EL-A3CW | MSS | THCA |
| TCGA-EL-A3CX | MSS | THCA |
| TCGA-EL-A3CY | MSS | THCA |
| TCGA-EL-A3CZ | MSS | THCA |
| TCGA-EL-A3D0 | MSS | THCA |
| TCGA-EL-A3D1 | MSS | THCA |
| TCGA-EL-A3D4 | MSS | THCA |
| TCGA-EL-A3D5 | MSS | THCA |
| TCGA-EL-A3D6 | MSS | THCA |
| TCGA-EL-A3GO | MSS | THCA |
| TCGA-EL-A3GP | MSS | THCA |
| TCGA-EL-A3GQ | MSS | THCA |
| TCGA-EL-A3GR | MSS | THCA |
| TCGA-EL-A3GS | MSS | THCA |
| TCGA-EL-A3GW | MSS | THCA |
| TCGA-EL-A3GX | MSS | THCA |
| TCGA-EL-A3GY | MSS | THCA |
| TCGA-EL-A3GZ | MSS | THCA |

|              |     |      |
|--------------|-----|------|
| TCGA-EL-A3H2 | MSS | THCA |
| TCGA-EL-A3H3 | MSS | THCA |
| TCGA-EL-A3H4 | MSS | THCA |
| TCGA-EL-A3H5 | MSS | THCA |
| TCGA-EL-A3H7 | MSS | THCA |
| TCGA-EL-A3H8 | MSS | THCA |
| TCGA-EL-A3MW | MSS | THCA |
| TCGA-EL-A3N3 | MSS | THCA |
| TCGA-EL-A3T0 | MSS | THCA |
| TCGA-EL-A3T1 | MSS | THCA |
| TCGA-EL-A3T3 | MSS | THCA |
| TCGA-EL-A3T6 | MSS | THCA |
| TCGA-EL-A3T7 | MSS | THCA |
| TCGA-EL-A3T8 | MSS | THCA |
| TCGA-EL-A3T9 | MSS | THCA |
| TCGA-EL-A3TB | MSS | THCA |
| TCGA-EL-A3ZG | MSS | THCA |
| TCGA-EL-A3ZH | MSS | THCA |
| TCGA-EL-A3ZK | MSS | THCA |
| TCGA-EL-A3ZL | MSS | THCA |
| TCGA-EL-A3ZM | MSS | THCA |
| TCGA-EL-A3ZN | MSS | THCA |
| TCGA-EL-A3ZO | MSS | THCA |
| TCGA-EL-A3ZP | MSS | THCA |
| TCGA-EL-A3ZQ | MSS | THCA |
| TCGA-EL-A3ZR | MSS | THCA |
| TCGA-EL-A3ZS | MSS | THCA |
| TCGA-EL-A3ZT | MSS | THCA |
| TCGA-EL-A4JV | MSS | THCA |
| TCGA-EL-A4JW | MSS | THCA |
| TCGA-EL-A4JX | MSS | THCA |
| TCGA-EL-A4JZ | MSS | THCA |
| TCGA-EL-A4K0 | MSS | THCA |
| TCGA-EL-A4K1 | MSS | THCA |
| TCGA-EL-A4K2 | MSS | THCA |
| TCGA-EL-A4K4 | MSS | THCA |
| TCGA-EL-A4K6 | MSS | THCA |
| TCGA-EL-A4K7 | MSS | THCA |
| TCGA-EL-A4K9 | MSS | THCA |
| TCGA-EL-A4KD | MSS | THCA |
| TCGA-EL-A4KG | MSS | THCA |
| TCGA-EL-A4KH | MSS | THCA |
| TCGA-EL-A4KI | MSS | THCA |
| TCGA-EM-A1CS | MSS | THCA |
| TCGA-EM-A1CT | MSS | THCA |
| TCGA-EM-A1CU | MSS | THCA |
| TCGA-EM-A1CV | MSS | THCA |
| TCGA-EM-A1CW | MSS | THCA |
| TCGA-EM-A1YA | MSS | THCA |
| TCGA-EM-A1YB | MSS | THCA |
| TCGA-EM-A1YC | MSS | THCA |
| TCGA-EM-A1YD | MSS | THCA |

|              |     |      |
|--------------|-----|------|
| TCGA-EM-A1YE | MSS | THCA |
| TCGA-EM-A22I | MSS | THCA |
| TCGA-EM-A22J | MSS | THCA |
| TCGA-EM-A22K | MSS | THCA |
| TCGA-EM-A22L | MSS | THCA |
| TCGA-EM-A22M | MSS | THCA |
| TCGA-EM-A22N | MSS | THCA |
| TCGA-EM-A22O | MSS | THCA |
| TCGA-EM-A22P | MSS | THCA |
| TCGA-EM-A22Q | MSS | THCA |
| TCGA-EM-A2CJ | MSS | THCA |
| TCGA-EM-A2CK | MSS | THCA |
| TCGA-EM-A2CL | MSS | THCA |
| TCGA-EM-A2CM | MSS | THCA |
| TCGA-EM-A2CN | MSS | THCA |
| TCGA-EM-A2CO | MSS | THCA |
| TCGA-EM-A2CP | MSS | THCA |
| TCGA-EM-A2CQ | MSS | THCA |
| TCGA-EM-A2CR | MSS | THCA |
| TCGA-EM-A2CS | MSS | THCA |
| TCGA-EM-A2CS | MSS | THCA |
| TCGA-EM-A2CT | MSS | THCA |
| TCGA-EM-A2CU | MSS | THCA |
| TCGA-EM-A2OV | MSS | THCA |
| TCGA-EM-A2OW | MSS | THCA |
| TCGA-EM-A2OX | MSS | THCA |
| TCGA-EM-A2OY | MSS | THCA |
| TCGA-EM-A2OZ | MSS | THCA |
| TCGA-EM-A2P0 | MSS | THCA |
| TCGA-EM-A2P1 | MSS | THCA |
| TCGA-EM-A2P1 | MSS | THCA |
| TCGA-EM-A2P2 | MSS | THCA |
| TCGA-EM-A2P3 | MSS | THCA |
| TCGA-EM-A3AI | MSS | THCA |
| TCGA-EM-A3AJ | MSS | THCA |
| TCGA-EM-A3AK | MSS | THCA |
| TCGA-EM-A3AL | MSS | THCA |
| TCGA-EM-A3AN | MSS | THCA |
| TCGA-EM-A3AO | MSS | THCA |
| TCGA-EM-A3AQ | MSS | THCA |
| TCGA-EM-A3AR | MSS | THCA |
| TCGA-EM-A3FR | MSS | THCA |
| TCGA-EM-A3O3 | MSS | THCA |
| TCGA-EM-A3O6 | MSS | THCA |
| TCGA-EM-A3O7 | MSS | THCA |
| TCGA-EM-A3O8 | MSS | THCA |
| TCGA-EM-A3O9 | MSS | THCA |
| TCGA-EM-A3OA | MSS | THCA |
| TCGA-EM-A3OB | MSS | THCA |
| TCGA-EM-A3ST | MSS | THCA |
| TCGA-EM-A3SU | MSS | THCA |
| TCGA-EM-A3SU | MSS | THCA |

|              |       |      |
|--------------|-------|------|
| TCGA-EM-A3SX | MSS   | THCA |
| TCGA-EM-A3SY | MSS   | THCA |
| TCGA-EM-A3SZ | MSS   | THCA |
| TCGA-EM-A4FF | MSS   | THCA |
| TCGA-EM-A4FH | MSS   | THCA |
| TCGA-EM-A4FK | MSS   | THCA |
| TCGA-EM-A4FM | MSS   | THCA |
| TCGA-EM-A4FN | MSS   | THCA |
| TCGA-EM-A4FO | MSS   | THCA |
| TCGA-EM-A4FQ | MSS   | THCA |
| TCGA-EM-A4FR | MSS   | THCA |
| TCGA-EM-A4FU | MSS   | THCA |
| TCGA-EM-A4FV | MSS   | THCA |
| TCGA-EM-A4G1 | MSS   | THCA |
| TCGA-EO-A1Y5 | MSS   | UCEC |
| TCGA-EO-A1Y7 | MSS   | UCEC |
| TCGA-EO-A1Y8 | MSS   | UCEC |
| TCGA-EO-A22R | MSI-H | UCEC |
| TCGA-EO-A22S | MSI-H | UCEC |
| TCGA-EO-A22T | MSI-H | UCEC |
| TCGA-EO-A2CG | MSS   | UCEC |
| TCGA-EO-A3AU | MSI-H | UCEC |
| TCGA-EO-A3AV | MSS   | UCEC |
| TCGA-EO-A3AY | MSS   | UCEC |
| TCGA-EO-A3AZ | MSI-H | UCEC |
| TCGA-EO-A3B1 | MSS   | UCEC |
| TCGA-EO-A3KU | MSS   | UCEC |
| TCGA-EO-A3KX | MSI-H | UCEC |
| TCGA-EP-A12J | MSS   | LIHC |
| TCGA-EP-A26S | MSS   | LIHC |
| TCGA-EP-A2KA | MSS   | LIHC |
| TCGA-EP-A2KB | MSS   | LIHC |
| TCGA-EP-A3RK | MSS   | LIHC |
| TCGA-EQ-5647 | MSS   | STAD |
| TCGA-EQ-8122 | MSS   | STAD |
| TCGA-EQ-A4SO | MSS   | STAD |
| TCGA-ER-A193 | MSS   | SKCM |
| TCGA-ER-A194 | MSS   | SKCM |
| TCGA-ER-A195 | MSS   | SKCM |
| TCGA-ER-A196 | MSS   | SKCM |
| TCGA-ER-A197 | MSS   | SKCM |
| TCGA-ER-A198 | MSS   | SKCM |
| TCGA-ER-A199 | MSS   | SKCM |
| TCGA-ER-A19A | MSS   | SKCM |
| TCGA-ER-A19B | MSS   | SKCM |
| TCGA-ER-A19C | MSS   | SKCM |
| TCGA-ER-A19D | MSS   | SKCM |
| TCGA-ER-A19E | MSS   | SKCM |
| TCGA-ER-A19F | MSS   | SKCM |
| TCGA-ER-A19G | MSS   | SKCM |
| TCGA-ER-A19H | MSS   | SKCM |
| TCGA-ER-A19K | MSS   | SKCM |

|              |     |      |
|--------------|-----|------|
| TCGA-ER-A19L | MSS | SKCM |
| TCGA-ER-A19M | MSS | SKCM |
| TCGA-ER-A19N | MSS | SKCM |
| TCGA-ER-A19O | MSS | SKCM |
| TCGA-ER-A19P | MSS | SKCM |
| TCGA-ER-A19Q | MSS | SKCM |
| TCGA-ER-A19S | MSS | SKCM |
| TCGA-ER-A19T | MSS | SKCM |
| TCGA-ER-A19T | MSS | SKCM |
| TCGA-ER-A19W | MSS | SKCM |
| TCGA-ER-A1A1 | MSS | SKCM |
| TCGA-ER-A2NB | MSS | SKCM |
| TCGA-ER-A2NC | MSS | SKCM |
| TCGA-ER-A2ND | MSS | SKCM |
| TCGA-ER-A2NE | MSS | SKCM |
| TCGA-ER-A2NF | MSS | SKCM |
| TCGA-ER-A2NF | MSS | SKCM |
| TCGA-ER-A2NG | MSS | SKCM |
| TCGA-ER-A2NH | MSS | SKCM |
| TCGA-ER-A3ES | MSS | SKCM |
| TCGA-ER-A3ET | MSS | SKCM |
| TCGA-ER-A3EV | MSS | SKCM |
| TCGA-ER-A3PL | MSS | SKCM |
| TCGA-ER-A42H | MSS | SKCM |
| TCGA-ER-A42K | MSS | SKCM |
| TCGA-ER-A42L | MSS | SKCM |
| TCGA-ES-A2HS | MSS | LIHC |
| TCGA-ES-A2HT | MSS | LIHC |
| TCGA-ET-A25G | MSS | THCA |
| TCGA-ET-A25I | MSS | THCA |
| TCGA-ET-A25J | MSS | THCA |
| TCGA-ET-A25K | MSS | THCA |
| TCGA-ET-A25O | MSS | THCA |
| TCGA-ET-A25R | MSS | THCA |
| TCGA-ET-A2MX | MSS | THCA |
| TCGA-ET-A2MY | MSS | THCA |
| TCGA-ET-A2MZ | MSS | THCA |
| TCGA-ET-A2N0 | MSS | THCA |
| TCGA-ET-A2N1 | MSS | THCA |
| TCGA-ET-A2N3 | MSS | THCA |
| TCGA-ET-A2N4 | MSS | THCA |
| TCGA-ET-A2N5 | MSS | THCA |
| TCGA-ET-A39I | MSS | THCA |
| TCGA-ET-A39J | MSS | THCA |
| TCGA-ET-A39K | MSS | THCA |
| TCGA-ET-A39L | MSS | THCA |
| TCGA-ET-A39M | MSS | THCA |
| TCGA-ET-A39N | MSS | THCA |
| TCGA-ET-A39O | MSS | THCA |
| TCGA-ET-A39P | MSS | THCA |
| TCGA-ET-A39R | MSS | THCA |
| TCGA-ET-A39S | MSS | THCA |

|              |              |      |
|--------------|--------------|------|
| TCGA-ET-A39T | MSS          | THCA |
| TCGA-ET-A3BN | MSS          | THCA |
| TCGA-ET-A3BO | MSS          | THCA |
| TCGA-ET-A3BP | MSS          | THCA |
| TCGA-ET-A3BQ | MSS          | THCA |
| TCGA-ET-A3BS | MSS          | THCA |
| TCGA-ET-A3BT | MSS          | THCA |
| TCGA-ET-A3BU | MSS          | THCA |
| TCGA-ET-A3BV | MSS          | THCA |
| TCGA-ET-A3BW | MSS          | THCA |
| TCGA-ET-A3BX | MSS          | THCA |
| TCGA-ET-A3DO | MSS          | THCA |
| TCGA-ET-A3DQ | MSS          | THCA |
| TCGA-ET-A3DR | MSS          | THCA |
| TCGA-ET-A3DS | MSS          | THCA |
| TCGA-ET-A3DT | MSS          | THCA |
| TCGA-ET-A3DU | MSS          | THCA |
| TCGA-ET-A3DV | MSS          | THCA |
| TCGA-ET-A3DW | MSS          | THCA |
| TCGA-ET-A40P | MSS          | THCA |
| TCGA-ET-A40Q | MSS          | THCA |
| TCGA-ET-A40R | MSS          | THCA |
| TCGA-ET-A40S | MSS          | THCA |
| TCGA-ET-A40T | MSS          | THCA |
| TCGA-ET-A4KN | MSS          | THCA |
| TCGA-ET-A4KQ | MSS          | THCA |
| TCGA-EU-5904 | MSS          | KIRC |
| TCGA-EU-5905 | MSS          | KIRC |
| TCGA-EU-5906 | MSS          | KIRC |
| TCGA-EU-5907 | MSS          | KIRC |
| TCGA-EV-5901 | MSS          | KIRP |
| TCGA-EV-5902 | MSS          | KIRP |
| TCGA-EV-5903 | MSS          | KIRP |
| TCGA-EW-A1IW | MSS          | BRCA |
| TCGA-EW-A1IX | MSS          | BRCA |
| TCGA-EW-A1IY | MSS          | BRCA |
| TCGA-EW-A1IZ | MSI-H        | BRCA |
| TCGA-EW-A1J1 | MSS          | BRCA |
| TCGA-EW-A1J2 | MSS          | BRCA |
| TCGA-EW-A1J3 | MSS          | BRCA |
| TCGA-EW-A1J5 | MSS          | BRCA |
| TCGA-EW-A1J6 | MSS          | BRCA |
| TCGA-EW-A1OV | MSI-H        | BRCA |
| TCGA-EW-A1OX | MSI-H        | BRCA |
| TCGA-EW-A1OY | MSS          | BRCA |
| TCGA-EW-A1OZ | MSI-H        | BRCA |
| TCGA-EW-A1P0 | MSS          | BRCA |
| TCGA-EW-A1P1 | MSI-H        | BRCA |
| TCGA-EW-A1P3 | MSS          | BRCA |
| TCGA-EW-A1P4 | Intermediate | BRCA |
| TCGA-EW-A1P5 | MSS          | BRCA |
| TCGA-EW-A1P6 | MSS          | BRCA |

|              |              |      |
|--------------|--------------|------|
| TCGA-EW-A1P7 | Intermediate | BRCA |
| TCGA-EW-A1P8 | MSS          | BRCA |
| TCGA-EW-A1PA | Intermediate | BRCA |
| TCGA-EW-A1PB | MSI-H        | BRCA |
| TCGA-EW-A1PD | MSI-H        | BRCA |
| TCGA-EW-A1PE | Intermediate | BRCA |
| TCGA-EW-A1PG | MSS          | BRCA |
| TCGA-EW-A2FS | Intermediate | BRCA |
| TCGA-EW-A2FV | MSI-H        | BRCA |
| TCGA-EW-A2FW | MSS          | BRCA |
| TCGA-EW-A6SA | MSS          | BRCA |
| TCGA-EW-A6SB | MSS          | BRCA |
| TCGA-EW-A6SC | MSS          | BRCA |
| TCGA-EW-A6SD | MSS          | BRCA |
| TCGA-EX-A1H5 | MSS          | CESC |
| TCGA-EX-A69L | MSS          | CESC |
| TCGA-EX-A69M | MSS          | CESC |
| TCGA-EX-A8YF | MSS          | CESC |
| TCGA-EY-A1GC | MSS          | UCEC |
| TCGA-EY-A1GF | MSI-H        | UCEC |
| TCGA-EY-A1GJ | MSS          | UCEC |
| TCGA-EY-A1GK | MSI-H        | UCEC |
| TCGA-EY-A1GO | MSI-H        | UCEC |
| TCGA-EY-A1GQ | MSI-H        | UCEC |
| TCGA-EY-A1GS | MSS          | UCEC |
| TCGA-EY-A1GU | MSI-H        | UCEC |
| TCGA-EY-A1H0 | MSI-H        | UCEC |
| TCGA-EY-A212 | MSS          | UCEC |
| TCGA-EY-A215 | MSI-H        | UCEC |
| TCGA-EY-A2OM | MSI-H        | UCEC |
| TCGA-EY-A2OO | MSS          | UCEC |
| TCGA-EY-A2OP | MSI-H        | UCEC |
| TCGA-EY-A2OQ | MSS          | UCEC |
| TCGA-EY-A4KR | MSS          | UCEC |
| TCGA-EY-A547 | MSI-H        | UCEC |
| TCGA-EY-A548 | MSI-H        | UCEC |
| TCGA-EY-A549 | MSI-H        | UCEC |
| TCGA-EY-A5W2 | MSI-H        | UCEC |
| TCGA-EY-A72D | MSS          | UCEC |
| TCGA-EZ-7264 | MSS          | LGG  |
| TCGA-F1-6177 | MSI-H        | STAD |
| TCGA-F1-6874 | MSI-H        | STAD |
| TCGA-F1-A448 | MSI-H        | STAD |
| TCGA-F1-A72C | MSS          | STAD |
| TCGA-F2-6880 | MSS          | PAAD |
| TCGA-F2-7273 | MSS          | PAAD |
| TCGA-F2-7276 | MSS          | PAAD |
| TCGA-F2-A44G | MSS          | PAAD |
| TCGA-F2-A7TX | MSS          | PAAD |
| TCGA-F2-A8YN | MSS          | PAAD |
| TCGA-F4-6459 | MSS          | COAD |
| TCGA-F4-6460 | MSS          | COAD |

|              |       |      |
|--------------|-------|------|
| TCGA-F4-6461 | MSS   | COAD |
| TCGA-F4-6463 | MSS   | COAD |
| TCGA-F4-6569 | MSS   | COAD |
| TCGA-F4-6570 | MSI-H | COAD |
| TCGA-F4-6703 | MSS   | COAD |
| TCGA-F4-6704 | MSS   | COAD |
| TCGA-F4-6806 | MSS   | COAD |
| TCGA-F4-6807 | MSS   | COAD |
| TCGA-F4-6808 | MSS   | COAD |
| TCGA-F4-6809 | MSS   | COAD |
| TCGA-F4-6854 | MSS   | COAD |
| TCGA-F4-6855 | MSS   | COAD |
| TCGA-F4-6856 | MSI-H | COAD |
| TCGA-F5-6464 | MSS   | READ |
| TCGA-F5-6465 | MSS   | READ |
| TCGA-F5-6571 | MSS   | READ |
| TCGA-F5-6702 | MSS   | READ |
| TCGA-F5-6810 | MSS   | READ |
| TCGA-F5-6811 | MSS   | READ |
| TCGA-F5-6812 | MSS   | READ |
| TCGA-F5-6813 | MSS   | READ |
| TCGA-F5-6814 | MSS   | READ |
| TCGA-F5-6861 | MSS   | READ |
| TCGA-F5-6863 | MSS   | READ |
| TCGA-F5-6864 | MSS   | READ |
| TCGA-F6-A8O3 | MSS   | LGG  |
| TCGA-F6-A8O4 | MSS   | LGG  |
| TCGA-F7-7848 | MSS   | HNSC |
| TCGA-F7-8298 | MSS   | HNSC |
| TCGA-F7-8489 | MSS   | HNSC |
| TCGA-F7-A50G | MSS   | HNSC |
| TCGA-F7-A50I | MSS   | HNSC |
| TCGA-F7-A50J | MSS   | HNSC |
| TCGA-F7-A61S | MSS   | HNSC |
| TCGA-F7-A61V | MSS   | HNSC |
| TCGA-F7-A61W | MSS   | HNSC |
| TCGA-F7-A620 | MSS   | HNSC |
| TCGA-F7-A622 | MSS   | HNSC |
| TCGA-F7-A623 | MSS   | HNSC |
| TCGA-F7-A624 | MSI-H | HNSC |
| TCGA-F9-A7Q0 | MSS   | KIRP |
| TCGA-F9-A7VF | MSS   | KIRP |
| TCGA-F9-A8NY | MSS   | KIRP |
| TCGA-F9-A97G | MSS   | KIRP |
| TCGA-FA-A4BB | MSS   | DLBC |
| TCGA-FA-A4XK | MSS   | DLBC |
| TCGA-FA-A6HN | MSS   | DLBC |
| TCGA-FA-A6HO | MSS   | DLBC |
| TCGA-FA-A7DS | MSS   | DLBC |
| TCGA-FA-A7Q1 | MSS   | DLBC |
| TCGA-FA-A82F | MSS   | DLBC |
| TCGA-FA-A86F | MSS   | DLBC |



|              |     |      |
|--------------|-----|------|
| TCGA-FB-A4P6 | MSS | PAAD |
| TCGA-FB-A5VM | MSS | PAAD |
| TCGA-FB-A78T | MSS | PAAD |
| TCGA-FB-A7DR | MSS | PAAD |
| TCGA-FB-AAPP | MSS | PAAD |
| TCGA-FB-AAPQ | MSS | PAAD |
| TCGA-FB-AAPS | MSS | PAAD |
| TCGA-FB-AAPU | MSS | PAAD |
| TCGA-FB-AAPY | MSS | PAAD |
| TCGA-FB-AAPZ | MSS | PAAD |
| TCGA-FB-AAQ0 | MSS | PAAD |
| TCGA-FB-AAQ1 | MSS | PAAD |
| TCGA-FB-AAQ2 | MSS | PAAD |
| TCGA-FB-AAQ3 | MSS | PAAD |
| TCGA-FB-AAQ6 | MSS | PAAD |
| TCGA-FC-7708 | MSS | PRAD |
| TCGA-FC-7961 | MSS | PRAD |
| TCGA-FC-A4JI | MSS | PRAD |
| TCGA-FC-A5OB | MSS | PRAD |
| TCGA-FC-A66V | MSS | PRAD |
| TCGA-FC-A6HD | MSS | PRAD |
| TCGA-FC-A8O0 | MSS | PRAD |
| TCGA-FD-A3B3 | MSS | BLCA |
| TCGA-FD-A3B4 | MSS | BLCA |
| TCGA-FD-A3B6 | MSS | BLCA |
| TCGA-FD-A3B8 | MSS | BLCA |
| TCGA-FD-A3SJ | MSS | BLCA |
| TCGA-FD-A3SL | MSS | BLCA |
| TCGA-FD-A3SM | MSS | BLCA |
| TCGA-FD-A3SN | MSS | BLCA |
| TCGA-FD-A3SO | MSS | BLCA |
| TCGA-FD-A3SP | MSS | BLCA |
| TCGA-FD-A3SQ | MSS | BLCA |
| TCGA-FD-A3SR | MSS | BLCA |
| TCGA-FD-A3SS | MSS | BLCA |
| TCGA-FD-A43N | MSS | BLCA |
| TCGA-FD-A43P | MSS | BLCA |
| TCGA-FD-A43S | MSS | BLCA |
| TCGA-FD-A43U | MSS | BLCA |
| TCGA-FD-A43X | MSS | BLCA |
| TCGA-FD-A5BY | MSS | BLCA |
| TCGA-FD-A5BZ | MSS | BLCA |
| TCGA-FD-A5C0 | MSS | BLCA |
| TCGA-FD-A5C1 | MSS | BLCA |
| TCGA-FD-A62N | MSS | BLCA |
| TCGA-FD-A62O | MSS | BLCA |
| TCGA-FD-A62P | MSS | BLCA |
| TCGA-FD-A62S | MSS | BLCA |
| TCGA-FD-A6TA | MSS | BLCA |
| TCGA-FD-A6TB | MSS | BLCA |
| TCGA-FD-A6TC | MSS | BLCA |
| TCGA-FD-A6TD | MSS | BLCA |

|              |       |      |
|--------------|-------|------|
| TCGA-FD-A6TE | MSS   | BLCA |
| TCGA-FD-A6TF | MSS   | BLCA |
| TCGA-FD-A6TG | MSS   | BLCA |
| TCGA-FD-A6TH | MSS   | BLCA |
| TCGA-FD-A6TI | MSS   | BLCA |
| TCGA-FD-A6TK | MSS   | BLCA |
| TCGA-FE-A22Z | MSS   | THCA |
| TCGA-FE-A230 | MSS   | THCA |
| TCGA-FE-A231 | MSS   | THCA |
| TCGA-FE-A232 | MSS   | THCA |
| TCGA-FE-A233 | MSS   | THCA |
| TCGA-FE-A234 | MSS   | THCA |
| TCGA-FE-A235 | MSS   | THCA |
| TCGA-FE-A236 | MSS   | THCA |
| TCGA-FE-A237 | MSS   | THCA |
| TCGA-FE-A23A | MSS   | THCA |
| TCGA-FE-A3PA | MSS   | THCA |
| TCGA-FE-A3PB | MSS   | THCA |
| TCGA-FE-A3PC | MSS   | THCA |
| TCGA-FE-A3PD | MSS   | THCA |
| TCGA-FF-8041 | MSS   | DLBC |
| TCGA-FF-8042 | MSS   | DLBC |
| TCGA-FF-8043 | MSS   | DLBC |
| TCGA-FF-8046 | MSS   | DLBC |
| TCGA-FF-8047 | MSS   | DLBC |
| TCGA-FF-8061 | MSS   | DLBC |
| TCGA-FF-8062 | MSI-H | DLBC |
| TCGA-FF-A7CQ | MSS   | DLBC |
| TCGA-FF-A7CR | MSS   | DLBC |
| TCGA-FF-A7CW | MSS   | DLBC |
| TCGA-FF-A7CX | MSS   | DLBC |
| TCGA-FG-5962 | MSS   | LGG  |
| TCGA-FG-5963 | MSS   | LGG  |
| TCGA-FG-5963 | MSS   | LGG  |
| TCGA-FG-5964 | MSS   | LGG  |
| TCGA-FG-5965 | MSS   | LGG  |
| TCGA-FG-5965 | MSS   | LGG  |
| TCGA-FG-5965 | MSS   | LGG  |
| TCGA-FG-6688 | MSS   | LGG  |
| TCGA-FG-6689 | MSS   | LGG  |
| TCGA-FG-6690 | MSS   | LGG  |
| TCGA-FG-6691 | MSS   | LGG  |
| TCGA-FG-6692 | MSS   | LGG  |
| TCGA-FG-7636 | MSS   | LGG  |
| TCGA-FG-7637 | MSS   | LGG  |
| TCGA-FG-7638 | MSS   | LGG  |
| TCGA-FG-7641 | MSS   | LGG  |
| TCGA-FG-7643 | MSS   | LGG  |
| TCGA-FG-8186 | MSS   | LGG  |
| TCGA-FG-8187 | MSS   | LGG  |
| TCGA-FG-8188 | MSS   | LGG  |
| TCGA-FG-8189 | MSS   | LGG  |

|              |              |      |
|--------------|--------------|------|
| TCGA-FG-A4MU | MSS          | LGG  |
| TCGA-FG-A60J | MSS          | LGG  |
| TCGA-FG-A60K | MSS          | LGG  |
| TCGA-FG-A60L | MSS          | LGG  |
| TCGA-FG-A6IZ | MSS          | LGG  |
| TCGA-FG-A6J1 | MSS          | LGG  |
| TCGA-FG-A6J3 | MSS          | LGG  |
| TCGA-FG-A70Y | MSS          | LGG  |
| TCGA-FG-A70Z | MSS          | LGG  |
| TCGA-FG-A710 | MSS          | LGG  |
| TCGA-FG-A711 | MSS          | LGG  |
| TCGA-FG-A713 | MSS          | LGG  |
| TCGA-FG-A87N | MSS          | LGG  |
| TCGA-FG-A87Q | MSS          | LGG  |
| TCGA-FI-A2CY | MSS          | UCEC |
| TCGA-FI-A2D0 | MSI-H        | UCEC |
| TCGA-FI-A2D2 | Intermediate | UCEC |
| TCGA-FI-A2D4 | MSI-H        | UCEC |
| TCGA-FI-A2D6 | MSI-H        | UCEC |
| TCGA-FI-A2EU | MSS          | UCEC |
| TCGA-FI-A2EW | MSS          | UCEC |
| TCGA-FI-A2EX | MSS          | UCEC |
| TCGA-FI-A2EY | MSS          | UCEC |
| TCGA-FI-A2F4 | MSI-H        | UCEC |
| TCGA-FI-A2F8 | MSS          | UCEC |
| TCGA-FI-A3PX | MSS          | UCEC |
| TCGA-FJ-A3Z7 | MSS          | BLCA |
| TCGA-FJ-A3Z9 | MSS          | BLCA |
| TCGA-FJ-A3ZE | MSS          | BLCA |
| TCGA-FJ-A3ZF | MSS          | BLCA |
| TCGA-FJ-A871 | MSS          | BLCA |
| TCGA-FK-A3S3 | MSS          | THCA |
| TCGA-FK-A3SB | MSS          | THCA |
| TCGA-FK-A3SD | MSS          | THCA |
| TCGA-FK-A3SE | MSS          | THCA |
| TCGA-FK-A3SG | MSS          | THCA |
| TCGA-FK-A3SH | MSS          | THCA |
| TCGA-FK-A4UB | MSS          | THCA |
| TCGA-FM-8000 | MSI-H        | DLBC |
| TCGA-FN-7833 | MSS          | LGG  |
| TCGA-FP-7829 | MSS          | STAD |
| TCGA-FP-8099 | MSS          | STAD |
| TCGA-FP-8209 | MSS          | STAD |
| TCGA-FP-8211 | MSS          | STAD |
| TCGA-FP-8631 | MSS          | STAD |
| TCGA-FP-A4BE | MSI-H        | STAD |
| TCGA-FP-A4BF | MSS          | STAD |
| TCGA-FP-A8CX | MSS          | STAD |
| TCGA-FP-A9TM | MSS          | STAD |
| TCGA-FR-A2OS | MSS          | SKCM |
| TCGA-FR-A3R1 | MSS          | SKCM |
| TCGA-FR-A3YN | MSS          | SKCM |

|              |     |      |
|--------------|-----|------|
| TCGA-FR-A3YO | MSS | SKCM |
| TCGA-FR-A44A | MSS | SKCM |
| TCGA-FR-A69P | MSS | SKCM |
| TCGA-FR-A726 | MSS | SKCM |
| TCGA-FR-A728 | MSS | SKCM |
| TCGA-FR-A729 | MSS | SKCM |
| TCGA-FR-A7U8 | MSS | SKCM |
| TCGA-FR-A7U9 | MSS | SKCM |
| TCGA-FR-A7UA | MSS | SKCM |
| TCGA-FR-A8YC | MSS | SKCM |
| TCGA-FR-A8YD | MSS | SKCM |
| TCGA-FR-A8YE | MSS | SKCM |
| TCGA-FS-A1YW | MSS | SKCM |
| TCGA-FS-A1YX | MSS | SKCM |
| TCGA-FS-A1YY | MSS | SKCM |
| TCGA-FS-A1Z0 | MSS | SKCM |
| TCGA-FS-A1Z3 | MSS | SKCM |
| TCGA-FS-A1Z4 | MSS | SKCM |
| TCGA-FS-A1Z7 | MSS | SKCM |
| TCGA-FS-A1ZA | MSS | SKCM |
| TCGA-FS-A1ZB | MSS | SKCM |
| TCGA-FS-A1ZC | MSS | SKCM |
| TCGA-FS-A1ZD | MSS | SKCM |
| TCGA-FS-A1ZE | MSS | SKCM |
| TCGA-FS-A1ZF | MSS | SKCM |
| TCGA-FS-A1ZG | MSS | SKCM |
| TCGA-FS-A1ZH | MSS | SKCM |
| TCGA-FS-A1ZJ | MSS | SKCM |
| TCGA-FS-A1ZK | MSS | SKCM |
| TCGA-FS-A1ZM | MSS | SKCM |
| TCGA-FS-A1ZN | MSS | SKCM |
| TCGA-FS-A1ZP | MSS | SKCM |
| TCGA-FS-A1ZQ | MSS | SKCM |
| TCGA-FS-A1ZR | MSS | SKCM |
| TCGA-FS-A1ZS | MSS | SKCM |
| TCGA-FS-A1ZT | MSS | SKCM |
| TCGA-FS-A1ZU | MSS | SKCM |
| TCGA-FS-A1ZW | MSS | SKCM |
| TCGA-FS-A1ZY | MSS | SKCM |
| TCGA-FS-A1ZZ | MSS | SKCM |
| TCGA-FS-A4F0 | MSS | SKCM |
| TCGA-FS-A4F2 | MSS | SKCM |
| TCGA-FS-A4F4 | MSS | SKCM |
| TCGA-FS-A4F8 | MSS | SKCM |
| TCGA-FS-A4F9 | MSS | SKCM |
| TCGA-FS-A4FC | MSS | SKCM |
| TCGA-FS-A4FD | MSS | SKCM |
| TCGA-FT-A3EE | MSS | BLCA |
| TCGA-FT-A61P | MSS | BLCA |
| TCGA-FU-A23K | MSS | CESC |
| TCGA-FU-A23L | MSS | CESC |
| TCGA-FU-A3TQ | MSS | CESC |

|              |     |      |
|--------------|-----|------|
| TCGA-FU-A3TX | MSS | CESC |
| TCGA-FU-A3WB | MSS | CESC |
| TCGA-FU-A3YQ | MSS | CESC |
| TCGA-FU-A57G | MSS | CESC |
| TCGA-FU-A770 | MSS | CESC |
| TCGA-FV-A23B | MSS | LIHC |
| TCGA-FV-A2QQ | MSS | LIHC |
| TCGA-FV-A2QR | MSS | LIHC |
| TCGA-FV-A3I0 | MSS | LIHC |
| TCGA-FV-A3I1 | MSS | LIHC |
| TCGA-FV-A3R2 | MSS | LIHC |
| TCGA-FV-A3R3 | MSS | LIHC |
| TCGA-FW-A3I3 | MSS | SKCM |
| TCGA-FW-A3R5 | MSS | SKCM |
| TCGA-FW-A3TU | MSS | SKCM |
| TCGA-FW-A3TV | MSS | SKCM |
| TCGA-FW-A5DX | MSS | SKCM |
| TCGA-FW-A5DY | MSS | SKCM |
| TCGA-FX-A76Y | MSS | SARC |
| TCGA-FX-A800 | MSS | SARC |
| TCGA-FY-A2QD | MSS | THCA |
| TCGA-FY-A3BL | MSS | THCA |
| TCGA-FY-A3I5 | MSS | THCA |
| TCGA-FY-A3ON | MSS | THCA |
| TCGA-FY-A3R6 | MSS | THCA |
| TCGA-FY-A3R7 | MSS | THCA |
| TCGA-FY-A3R8 | MSS | THCA |
| TCGA-FY-A3R9 | MSS | THCA |
| TCGA-FY-A3RA | MSS | THCA |
| TCGA-FY-A3TY | MSS | THCA |
| TCGA-FY-A3W9 | MSS | THCA |
| TCGA-FY-A3WA | MSS | THCA |
| TCGA-FY-A3YR | MSS | THCA |
| TCGA-FY-A40K | MSS | THCA |
| TCGA-FY-A40L | MSS | THCA |
| TCGA-FY-A40M | MSS | THCA |
| TCGA-FY-A40N | MSS | THCA |
| TCGA-FY-A4B0 | MSS | THCA |
| TCGA-FY-A4B3 | MSS | THCA |
| TCGA-FY-A4B4 | MSS | THCA |
| TCGA-FY-A76V | MSS | THCA |
| TCGA-FZ-5919 | MSS | PAAD |
| TCGA-FZ-5920 | MSS | PAAD |
| TCGA-FZ-5921 | MSS | PAAD |
| TCGA-FZ-5922 | MSS | PAAD |
| TCGA-FZ-5923 | MSS | PAAD |
| TCGA-FZ-5924 | MSS | PAAD |
| TCGA-FZ-5926 | MSS | PAAD |
| TCGA-G2-A2EC | MSS | BLCA |
| TCGA-G2-A2EF | MSS | BLCA |
| TCGA-G2-A2EJ | MSS | BLCA |
| TCGA-G2-A2EK | MSS | BLCA |

|              |              |      |
|--------------|--------------|------|
| TCGA-G2-A2EL | MSS          | BLCA |
| TCGA-G2-A2EO | MSS          | BLCA |
| TCGA-G2-A2ES | MSS          | BLCA |
| TCGA-G2-A3VY | MSS          | BLCA |
| TCGA-G2-AA3B | MSS          | BLCA |
| TCGA-G2-AA3C | MSS          | BLCA |
| TCGA-G2-AA3D | MSS          | BLCA |
| TCGA-G2-AA3F | MSS          | BLCA |
| TCGA-G3-A25S | MSS          | LIHC |
| TCGA-G3-A25T | MSS          | LIHC |
| TCGA-G3-A25U | MSS          | LIHC |
| TCGA-G3-A25V | MSS          | LIHC |
| TCGA-G3-A25W | MSS          | LIHC |
| TCGA-G3-A25Y | MSS          | LIHC |
| TCGA-G3-A25Z | MSS          | LIHC |
| TCGA-G3-A3CG | MSS          | LIHC |
| TCGA-G3-A3CH | MSS          | LIHC |
| TCGA-G3-A3CJ | MSI-H        | LIHC |
| TCGA-G3-A3CK | MSS          | LIHC |
| TCGA-G3-A6UC | MSS          | LIHC |
| TCGA-G3-A7M5 | MSS          | LIHC |
| TCGA-G3-A7M6 | MSS          | LIHC |
| TCGA-G3-A7M7 | MSS          | LIHC |
| TCGA-G3-A7M8 | MSS          | LIHC |
| TCGA-G3-A7M9 | MSS          | LIHC |
| TCGA-G3-AAUZ | MSS          | LIHC |
| TCGA-G3-AAV0 | MSS          | LIHC |
| TCGA-G3-AAV1 | MSS          | LIHC |
| TCGA-G3-AAV2 | MSS          | LIHC |
| TCGA-G3-AAV3 | MSS          | LIHC |
| TCGA-G3-AAV4 | MSS          | LIHC |
| TCGA-G3-AAV5 | MSS          | LIHC |
| TCGA-G3-AAV6 | MSS          | LIHC |
| TCGA-G3-AAV7 | MSS          | LIHC |
| TCGA-G4-6293 | MSS          | COAD |
| TCGA-G4-6294 | MSS          | COAD |
| TCGA-G4-6295 | MSS          | COAD |
| TCGA-G4-6297 | MSS          | COAD |
| TCGA-G4-6298 | MSS          | COAD |
| TCGA-G4-6299 | MSS          | COAD |
| TCGA-G4-6302 | MSS          | COAD |
| TCGA-G4-6303 | MSS          | COAD |
| TCGA-G4-6304 | Intermediate | COAD |
| TCGA-G4-6306 | MSS          | COAD |
| TCGA-G4-6307 | MSS          | COAD |
| TCGA-G4-6309 | MSI-H        | COAD |
| TCGA-G4-6310 | MSS          | COAD |
| TCGA-G4-6311 | MSS          | COAD |
| TCGA-G4-6314 | MSS          | COAD |
| TCGA-G4-6315 | MSS          | COAD |
| TCGA-G4-6317 | MSS          | COAD |
| TCGA-G4-6317 | MSS          | COAD |

|              |       |      |
|--------------|-------|------|
| TCGA-G4-6320 | MSI-H | COAD |
| TCGA-G4-6321 | MSS   | COAD |
| TCGA-G4-6322 | MSS   | COAD |
| TCGA-G4-6323 | MSS   | COAD |
| TCGA-G4-6586 | MSI-H | COAD |
| TCGA-G4-6588 | MSI-H | COAD |
| TCGA-G4-6625 | MSS   | COAD |
| TCGA-G4-6626 | MSS   | COAD |
| TCGA-G4-6627 | MSS   | COAD |
| TCGA-G4-6628 | MSI-H | COAD |
| TCGA-G5-6233 | MSS   | READ |
| TCGA-G5-6235 | MSS   | READ |
| TCGA-G5-6572 | MSS   | READ |
| TCGA-G5-6572 | MSS   | READ |
| TCGA-G5-6641 | MSS   | READ |
| TCGA-G6-A5PC | MSS   | KIRC |
| TCGA-G6-A8L6 | MSS   | KIRC |
| TCGA-G6-A8L7 | MSS   | KIRC |
| TCGA-G6-A8L8 | MSS   | KIRC |
| TCGA-G7-6789 | MSS   | KIRP |
| TCGA-G7-6790 | MSS   | KIRP |
| TCGA-G7-6792 | MSS   | KIRP |
| TCGA-G7-6793 | MSS   | KIRP |
| TCGA-G7-6795 | MSS   | KIRP |
| TCGA-G7-6796 | MSS   | KIRP |
| TCGA-G7-6797 | MSS   | KIRP |
| TCGA-G7-7501 | MSS   | KIRP |
| TCGA-G7-7502 | MSS   | KIRP |
| TCGA-G7-A4TM | MSS   | KIRP |
| TCGA-G7-A8LB | MSS   | KIRP |
| TCGA-G7-A8LC | MSS   | KIRP |
| TCGA-G7-A8LD | MSS   | KIRP |
| TCGA-G7-A8LE | MSS   | KIRP |
| TCGA-G8-6324 | MSI-H | DLBC |
| TCGA-G8-6325 | MSI-H | DLBC |
| TCGA-G8-6326 | MSI-H | DLBC |
| TCGA-G8-6906 | MSI-H | DLBC |
| TCGA-G8-6907 | MSI-H | DLBC |
| TCGA-G8-6909 | MSI-H | DLBC |
| TCGA-G8-6914 | MSI-H | DLBC |
| TCGA-G9-6329 | MSS   | PRAD |
| TCGA-G9-6332 | MSS   | PRAD |
| TCGA-G9-6333 | MSS   | PRAD |
| TCGA-G9-6336 | MSS   | PRAD |
| TCGA-G9-6338 | MSS   | PRAD |
| TCGA-G9-6339 | MSS   | PRAD |
| TCGA-G9-6342 | MSS   | PRAD |
| TCGA-G9-6343 | MSS   | PRAD |
| TCGA-G9-6347 | MSS   | PRAD |
| TCGA-G9-6348 | MSS   | PRAD |
| TCGA-G9-6351 | MSS   | PRAD |
| TCGA-G9-6353 | MSS   | PRAD |

|              |              |      |
|--------------|--------------|------|
| TCGA-G9-6354 | MSS          | PRAD |
| TCGA-G9-6356 | MSS          | PRAD |
| TCGA-G9-6361 | MSS          | PRAD |
| TCGA-G9-6362 | MSS          | PRAD |
| TCGA-G9-6363 | MSS          | PRAD |
| TCGA-G9-6364 | MSS          | PRAD |
| TCGA-G9-6365 | MSS          | PRAD |
| TCGA-G9-6367 | MSS          | PRAD |
| TCGA-G9-6369 | MSS          | PRAD |
| TCGA-G9-6370 | MSS          | PRAD |
| TCGA-G9-6371 | MSS          | PRAD |
| TCGA-G9-6373 | MSS          | PRAD |
| TCGA-G9-6377 | MSS          | PRAD |
| TCGA-G9-6378 | MSS          | PRAD |
| TCGA-G9-6379 | MSS          | PRAD |
| TCGA-G9-6384 | MSS          | PRAD |
| TCGA-G9-6385 | MSS          | PRAD |
| TCGA-G9-6494 | MSS          | PRAD |
| TCGA-G9-6496 | MSS          | PRAD |
| TCGA-G9-6498 | MSS          | PRAD |
| TCGA-G9-6499 | MSS          | PRAD |
| TCGA-G9-7509 | MSS          | PRAD |
| TCGA-G9-7522 | MSS          | PRAD |
| TCGA-G9-A9S0 | MSS          | PRAD |
| TCGA-G9-A9S4 | MSS          | PRAD |
| TCGA-G9-A9S7 | MSS          | PRAD |
| TCGA-GC-A3BM | MSS          | BLCA |
| TCGA-GC-A3I6 | MSS          | BLCA |
| TCGA-GC-A3O0 | MSS          | BLCA |
| TCGA-GC-A3RC | MSS          | BLCA |
| TCGA-GC-A3RD | MSS          | BLCA |
| TCGA-GC-A3WC | MSS          | BLCA |
| TCGA-GC-A3YS | MSS          | BLCA |
| TCGA-GC-A6I1 | MSS          | BLCA |
| TCGA-GC-A6I3 | MSS          | BLCA |
| TCGA-GD-A2C5 | MSS          | BLCA |
| TCGA-GD-A3OP | MSS          | BLCA |
| TCGA-GD-A3OQ | MSS          | BLCA |
| TCGA-GD-A3OS | MSS          | BLCA |
| TCGA-GD-A6C6 | MSS          | BLCA |
| TCGA-GD-A76B | MSS          | BLCA |
| TCGA-GE-A2C6 | MSS          | THCA |
| TCGA-GF-A2C7 | MSS          | SKCM |
| TCGA-GF-A3OT | MSS          | SKCM |
| TCGA-GF-A4EO | MSS          | SKCM |
| TCGA-GF-A6C8 | MSS          | SKCM |
| TCGA-GF-A6C9 | MSS          | SKCM |
| TCGA-GF-A769 | MSS          | SKCM |
| TCGA-GH-A9DA | MSS          | CESC |
| TCGA-GI-A2C8 | Intermediate | BRCA |
| TCGA-GJ-A3OU | MSS          | LIHC |
| TCGA-GJ-A6C0 | MSS          | LIHC |



|              |              |      |
|--------------|--------------|------|
| TCGA-GJ-A9DB | MSS          | LIHC |
| TCGA-GK-A6C7 | MSS          | KIRC |
| TCGA-GL-6846 | MSS          | KIRP |
| TCGA-GL-7773 | MSS          | KIRP |
| TCGA-GL-7966 | MSS          | KIRP |
| TCGA-GL-8500 | MSS          | KIRP |
| TCGA-GL-A9DC | MSS          | KIRP |
| TCGA-GL-A9DD | MSS          | KIRP |
| TCGA-GL-A9DE | MSS          | KIRP |
| TCGA-GM-A2D9 | MSS          | BRCA |
| TCGA-GM-A2DB | MSS          | BRCA |
| TCGA-GM-A2DC | MSS          | BRCA |
| TCGA-GM-A2DD | MSS          | BRCA |
| TCGA-GM-A2DF | MSS          | BRCA |
| TCGA-GM-A2DH | MSS          | BRCA |
| TCGA-GM-A2DI | MSS          | BRCA |
| TCGA-GM-A2DK | MSS          | BRCA |
| TCGA-GM-A2DL | MSS          | BRCA |
| TCGA-GM-A2DM | MSS          | BRCA |
| TCGA-GM-A2DN | Intermediate | BRCA |
| TCGA-GM-A2DO | MSS          | BRCA |
| TCGA-GM-A3NY | MSS          | BRCA |
| TCGA-GM-A3XN | MSS          | BRCA |
| TCGA-GM-A4E0 | MSS          | BRCA |
| TCGA-GM-A5PX | MSS          | BRCA |
| TCGA-GN-A262 | MSS          | SKCM |
| TCGA-GN-A263 | MSS          | SKCM |
| TCGA-GN-A264 | MSS          | SKCM |
| TCGA-GN-A265 | MSS          | SKCM |
| TCGA-GN-A266 | MSS          | SKCM |
| TCGA-GN-A267 | MSS          | SKCM |
| TCGA-GN-A268 | MSS          | SKCM |
| TCGA-GN-A269 | MSS          | SKCM |
| TCGA-GN-A26A | MSS          | SKCM |
| TCGA-GN-A26C | MSS          | SKCM |
| TCGA-GN-A4U3 | MSS          | SKCM |
| TCGA-GN-A4U4 | MSS          | SKCM |
| TCGA-GN-A4U5 | MSS          | SKCM |
| TCGA-GN-A4U7 | MSS          | SKCM |
| TCGA-GN-A4U8 | MSS          | SKCM |
| TCGA-GN-A4U9 | MSS          | SKCM |
| TCGA-GN-A8LK | MSS          | SKCM |
| TCGA-GN-A8LL | MSS          | SKCM |
| TCGA-GN-A8LN | MSS          | SKCM |
| TCGA-GN-A9SD | MSS          | SKCM |
| TCGA-GR-7351 | MSI-H        | DLBC |
| TCGA-GR-7353 | MSI-H        | DLBC |
| TCGA-GR-A4D4 | MSS          | DLBC |
| TCGA-GR-A4D5 | MSS          | DLBC |
| TCGA-GR-A4D6 | MSS          | DLBC |
| TCGA-GR-A4D9 | MSS          | DLBC |
| TCGA-GS-A9TQ | MSS          | DLBC |

|              |     |      |
|--------------|-----|------|
| TCGA-GS-A9TT | MSS | DLBC |
| TCGA-GS-A9TU | MSS | DLBC |
| TCGA-GS-A9TV | MSS | DLBC |
| TCGA-GS-A9TW | MSS | DLBC |
| TCGA-GS-A9TX | MSS | DLBC |
| TCGA-GS-A9TY | MSS | DLBC |
| TCGA-GS-A9TZ | MSS | DLBC |
| TCGA-GS-A9U3 | MSS | DLBC |
| TCGA-GS-A9U4 | MSS | DLBC |
| TCGA-GU-A42Q | MSS | BLCA |
| TCGA-GU-A42R | MSS | BLCA |
| TCGA-GU-A762 | MSS | BLCA |
| TCGA-GU-A763 | MSS | BLCA |
| TCGA-GU-A764 | MSS | BLCA |
| TCGA-GU-A766 | MSS | BLCA |
| TCGA-GU-A767 | MSS | BLCA |
| TCGA-GU-AATO | MSS | BLCA |
| TCGA-GU-AATP | MSS | BLCA |
| TCGA-GU-AATQ | MSS | BLCA |
| TCGA-GV-A3JV | MSS | BLCA |
| TCGA-GV-A3JX | MSS | BLCA |
| TCGA-GV-A3QF | MSS | BLCA |
| TCGA-GV-A3QG | MSS | BLCA |
| TCGA-GV-A3QH | MSS | BLCA |
| TCGA-GV-A3QK | MSS | BLCA |
| TCGA-GV-A40E | MSS | BLCA |
| TCGA-GV-A40G | MSS | BLCA |
| TCGA-GV-A6ZA | MSS | BLCA |
| TCGA-H2-A26U | MSS | THCA |
| TCGA-H2-A2K9 | MSS | THCA |
| TCGA-H2-A3RH | MSS | THCA |
| TCGA-H2-A3RI | MSS | THCA |
| TCGA-H2-A421 | MSS | THCA |
| TCGA-H2-A422 | MSS | THCA |
| TCGA-H4-A2HO | MSS | BLCA |
| TCGA-H4-A2HQ | MSS | BLCA |
| TCGA-H6-8124 | MSS | PAAD |
| TCGA-H6-A45N | MSS | PAAD |
| TCGA-H7-7774 | MSS | HNSC |
| TCGA-H7-8501 | MSS | HNSC |
| TCGA-H7-8502 | MSS | HNSC |
| TCGA-H7-A6C4 | MSS | HNSC |
| TCGA-H7-A6C5 | MSS | HNSC |
| TCGA-H7-A76A | MSS | HNSC |
| TCGA-H8-A6C1 | MSS | PAAD |
| TCGA-H9-A6BX | MSS | PRAD |
| TCGA-H9-A6BY | MSS | PRAD |
| TCGA-HC-7075 | MSS | PRAD |
| TCGA-HC-7077 | MSS | PRAD |
| TCGA-HC-7079 | MSS | PRAD |
| TCGA-HC-7080 | MSS | PRAD |
| TCGA-HC-7081 | MSS | PRAD |

|              |     |      |
|--------------|-----|------|
| TCGA-HC-7209 | MSS | PRAD |
| TCGA-HC-7210 | MSS | PRAD |
| TCGA-HC-7213 | MSS | PRAD |
| TCGA-HC-7231 | MSS | PRAD |
| TCGA-HC-7232 | MSS | PRAD |
| TCGA-HC-7233 | MSS | PRAD |
| TCGA-HC-7736 | MSS | PRAD |
| TCGA-HC-7740 | MSS | PRAD |
| TCGA-HC-7740 | MSS | PRAD |
| TCGA-HC-7742 | MSS | PRAD |
| TCGA-HC-7747 | MSS | PRAD |
| TCGA-HC-7748 | MSS | PRAD |
| TCGA-HC-7817 | MSS | PRAD |
| TCGA-HC-7818 | MSS | PRAD |
| TCGA-HC-7819 | MSS | PRAD |
| TCGA-HC-7820 | MSS | PRAD |
| TCGA-HC-7821 | MSS | PRAD |
| TCGA-HC-8213 | MSS | PRAD |
| TCGA-HC-8216 | MSS | PRAD |
| TCGA-HC-8264 | MSS | PRAD |
| TCGA-HC-8265 | MSS | PRAD |
| TCGA-HC-A48F | MSS | PRAD |
| TCGA-HC-A4ZV | MSS | PRAD |
| TCGA-HC-A631 | MSS | PRAD |
| TCGA-HC-A632 | MSS | PRAD |
| TCGA-HC-A6AL | MSS | PRAD |
| TCGA-HC-A6AN | MSS | PRAD |
| TCGA-HC-A6AO | MSS | PRAD |
| TCGA-HC-A6AP | MSS | PRAD |
| TCGA-HC-A6AQ | MSS | PRAD |
| TCGA-HC-A6AS | MSS | PRAD |
| TCGA-HC-A6HX | MSS | PRAD |
| TCGA-HC-A6HY | MSS | PRAD |
| TCGA-HC-A76W | MSS | PRAD |
| TCGA-HC-A76X | MSS | PRAD |
| TCGA-HC-A8CY | MSS | PRAD |
| TCGA-HC-A8D0 | MSS | PRAD |
| TCGA-HC-A8D1 | MSS | PRAD |
| TCGA-HC-A9TE | MSS | PRAD |
| TCGA-HC-A9TH | MSS | PRAD |
| TCGA-HD-7229 | MSS | HNSC |
| TCGA-HD-7753 | MSS | HNSC |
| TCGA-HD-7754 | MSS | HNSC |
| TCGA-HD-7831 | MSS | HNSC |
| TCGA-HD-7832 | MSS | HNSC |
| TCGA-HD-8224 | MSS | HNSC |
| TCGA-HD-8314 | MSS | HNSC |
| TCGA-HD-8634 | MSS | HNSC |
| TCGA-HD-8635 | MSS | HNSC |
| TCGA-HD-A4C1 | MSS | HNSC |
| TCGA-HD-A633 | MSS | HNSC |
| TCGA-HD-A634 | MSS | HNSC |

|              |       |      |
|--------------|-------|------|
| TCGA-HD-A6HZ | MSS   | HNSC |
| TCGA-HD-A6IO | MSS   | HNSC |
| TCGA-HE-7128 | MSS   | KIRP |
| TCGA-HE-7129 | MSS   | KIRP |
| TCGA-HE-7130 | MSS   | KIRP |
| TCGA-HE-A5NK | MSS   | KIRP |
| TCGA-HF-7131 | MSS   | STAD |
| TCGA-HF-7132 | MSI-H | STAD |
| TCGA-HF-7133 | MSS   | STAD |
| TCGA-HF-A5NB | MSI-H | STAD |
| TCGA-HG-A2PA | MSS   | CESC |
| TCGA-HG-A9SC | MSS   | CESC |
| TCGA-HI-7168 | MSS   | PRAD |
| TCGA-HI-7169 | MSS   | PRAD |
| TCGA-HI-7171 | MSS   | PRAD |
| TCGA-HM-A4S6 | MSS   | CESC |
| TCGA-HM-A6W2 | MSS   | CESC |
| TCGA-HM-A6W2 | MSS   | CESC |
| TCGA-HN-A2NL | MSS   | BRCA |
| TCGA-HN-A2OB | MSS   | BRCA |
| TCGA-HQ-A2OE | MSS   | BLCA |
| TCGA-HQ-A5ND | MSS   | BLCA |
| TCGA-HQ-A5NE | MSS   | BLCA |
| TCGA-HR-A2OG | MSS   | SKCM |
| TCGA-HR-A2OH | MSS   | SKCM |
| TCGA-HR-A5NC | MSS   | SKCM |
| TCGA-HS-A5N8 | MSS   | SARC |
| TCGA-HS-A5N9 | MSS   | SARC |
| TCGA-HT-7467 | MSS   | LGG  |
| TCGA-HT-7468 | MSS   | LGG  |
| TCGA-HT-7470 | MSS   | LGG  |
| TCGA-HT-7472 | MSS   | LGG  |
| TCGA-HT-7473 | MSS   | LGG  |
| TCGA-HT-7474 | MSS   | LGG  |
| TCGA-HT-7475 | MSS   | LGG  |
| TCGA-HT-7476 | MSS   | LGG  |
| TCGA-HT-7477 | MSS   | LGG  |
| TCGA-HT-7478 | MSS   | LGG  |
| TCGA-HT-7479 | MSS   | LGG  |
| TCGA-HT-7480 | MSS   | LGG  |
| TCGA-HT-7481 | MSS   | LGG  |
| TCGA-HT-7483 | MSS   | LGG  |
| TCGA-HT-7485 | MSS   | LGG  |
| TCGA-HT-7601 | MSS   | LGG  |
| TCGA-HT-7602 | MSS   | LGG  |
| TCGA-HT-7604 | MSS   | LGG  |
| TCGA-HT-7605 | MSS   | LGG  |
| TCGA-HT-7607 | MSS   | LGG  |
| TCGA-HT-7608 | MSS   | LGG  |
| TCGA-HT-7609 | MSS   | LGG  |
| TCGA-HT-7611 | MSS   | LGG  |
| TCGA-HT-7616 | MSS   | LGG  |

|              |       |     |
|--------------|-------|-----|
| TCGA-HT-7676 | MSS   | LGG |
| TCGA-HT-7677 | MSS   | LGG |
| TCGA-HT-7680 | MSS   | LGG |
| TCGA-HT-7681 | MSS   | LGG |
| TCGA-HT-7686 | MSS   | LGG |
| TCGA-HT-7691 | MSS   | LGG |
| TCGA-HT-7693 | MSS   | LGG |
| TCGA-HT-7694 | MSS   | LGG |
| TCGA-HT-7695 | MSS   | LGG |
| TCGA-HT-7855 | MSS   | LGG |
| TCGA-HT-7856 | MSS   | LGG |
| TCGA-HT-7857 | MSS   | LGG |
| TCGA-HT-7858 | MSS   | LGG |
| TCGA-HT-7860 | MSS   | LGG |
| TCGA-HT-7873 | MSS   | LGG |
| TCGA-HT-7874 | MSS   | LGG |
| TCGA-HT-7875 | MSS   | LGG |
| TCGA-HT-7877 | MSS   | LGG |
| TCGA-HT-7879 | MSS   | LGG |
| TCGA-HT-7880 | MSS   | LGG |
| TCGA-HT-7881 | MSS   | LGG |
| TCGA-HT-7882 | MSS   | LGG |
| TCGA-HT-7884 | MSS   | LGG |
| TCGA-HT-7902 | MSS   | LGG |
| TCGA-HT-8010 | MSS   | LGG |
| TCGA-HT-8011 | MSS   | LGG |
| TCGA-HT-8012 | MSS   | LGG |
| TCGA-HT-8013 | MSS   | LGG |
| TCGA-HT-8015 | MSS   | LGG |
| TCGA-HT-8018 | MSS   | LGG |
| TCGA-HT-8019 | MSS   | LGG |
| TCGA-HT-8104 | MSS   | LGG |
| TCGA-HT-8105 | MSS   | LGG |
| TCGA-HT-8106 | MSS   | LGG |
| TCGA-HT-8107 | MSS   | LGG |
| TCGA-HT-8108 | MSS   | LGG |
| TCGA-HT-8109 | MSS   | LGG |
| TCGA-HT-8110 | MSS   | LGG |
| TCGA-HT-8111 | MSS   | LGG |
| TCGA-HT-8113 | MSS   | LGG |
| TCGA-HT-8114 | MSS   | LGG |
| TCGA-HT-8558 | MSS   | LGG |
| TCGA-HT-8563 | MSS   | LGG |
| TCGA-HT-8564 | MSI-H | LGG |
| TCGA-HT-A5R5 | MSS   | LGG |
| TCGA-HT-A5R7 | MSS   | LGG |
| TCGA-HT-A5R9 | MSS   | LGG |
| TCGA-HT-A5RA | MSS   | LGG |
| TCGA-HT-A5RB | MSS   | LGG |
| TCGA-HT-A5RC | MSS   | LGG |
| TCGA-HT-A614 | MSS   | LGG |
| TCGA-HT-A615 | MSS   | LGG |

|              |       |      |
|--------------|-------|------|
| TCGA-HT-A616 | MSS   | LGG  |
| TCGA-HT-A617 | MSS   | LGG  |
| TCGA-HT-A618 | MSS   | LGG  |
| TCGA-HT-A619 | MSS   | LGG  |
| TCGA-HT-A61A | MSS   | LGG  |
| TCGA-HT-A61B | MSS   | LGG  |
| TCGA-HT-A61C | MSS   | LGG  |
| TCGA-HT-A74H | MSS   | LGG  |
| TCGA-HT-A74J | MSS   | LGG  |
| TCGA-HT-A74K | MSS   | LGG  |
| TCGA-HT-A74L | MSS   | LGG  |
| TCGA-HT-A74O | MSS   | LGG  |
| TCGA-HU-8238 | MSS   | STAD |
| TCGA-HU-8243 | MSS   | STAD |
| TCGA-HU-8244 | MSS   | STAD |
| TCGA-HU-8245 | MSS   | STAD |
| TCGA-HU-8249 | MSS   | STAD |
| TCGA-HU-8602 | MSI-H | STAD |
| TCGA-HU-8604 | MSS   | STAD |
| TCGA-HU-8608 | MSS   | STAD |
| TCGA-HU-8610 | MSS   | STAD |
| TCGA-HU-A4G2 | MSS   | STAD |
| TCGA-HU-A4G3 | MSS   | STAD |
| TCGA-HU-A4G6 | MSS   | STAD |
| TCGA-HU-A4G8 | MSI-H | STAD |
| TCGA-HU-A4G9 | MSI-H | STAD |
| TCGA-HU-A4GC | MSS   | STAD |
| TCGA-HU-A4GD | MSS   | STAD |
| TCGA-HU-A4GF | MSS   | STAD |
| TCGA-HU-A4GH | MSS   | STAD |
| TCGA-HU-A4GJ | MSS   | STAD |
| TCGA-HU-A4GN | MSI-H | STAD |
| TCGA-HU-A4GP | MSS   | STAD |
| TCGA-HU-A4GQ | MSI-H | STAD |
| TCGA-HU-A4GT | MSI-H | STAD |
| TCGA-HU-A4GU | MSI-H | STAD |
| TCGA-HU-A4GX | MSI-H | STAD |
| TCGA-HU-A4GY | MSS   | STAD |
| TCGA-HU-A4H2 | MSS   | STAD |
| TCGA-HU-A4H3 | MSI-H | STAD |
| TCGA-HU-A4H4 | MSI-H | STAD |
| TCGA-HU-A4H5 | MSS   | STAD |
| TCGA-HU-A4H6 | MSS   | STAD |
| TCGA-HU-A4H8 | MSI-H | STAD |
| TCGA-HU-A4HB | MSS   | STAD |
| TCGA-HU-A4HD | MSS   | STAD |
| TCGA-HV-A7OL | MSS   | PAAD |
| TCGA-HV-A7OP | MSS   | PAAD |
| TCGA-HV-AA8V | MSS   | PAAD |
| TCGA-HV-AA8X | MSS   | PAAD |
| TCGA-HW-7486 | MSS   | LGG  |
| TCGA-HW-7487 | MSS   | LGG  |

|              |     |      |
|--------------|-----|------|
| TCGA-HW-7489 | MSS | LGG  |
| TCGA-HW-7490 | MSS | LGG  |
| TCGA-HW-7491 | MSS | LGG  |
| TCGA-HW-7493 | MSS | LGG  |
| TCGA-HW-7495 | MSS | LGG  |
| TCGA-HW-8319 | MSS | LGG  |
| TCGA-HW-8320 | MSS | LGG  |
| TCGA-HW-8321 | MSS | LGG  |
| TCGA-HW-8322 | MSS | LGG  |
| TCGA-HW-A5KJ | MSS | LGG  |
| TCGA-HW-A5KK | MSS | LGG  |
| TCGA-HW-A5KL | MSS | LGG  |
| TCGA-HW-A5KM | MSS | LGG  |
| TCGA-HZ-7289 | MSS | PAAD |
| TCGA-HZ-7918 | MSS | PAAD |
| TCGA-HZ-7919 | MSS | PAAD |
| TCGA-HZ-7920 | MSS | PAAD |
| TCGA-HZ-7922 | MSS | PAAD |
| TCGA-HZ-7923 | MSS | PAAD |
| TCGA-HZ-7924 | MSS | PAAD |
| TCGA-HZ-7925 | MSS | PAAD |
| TCGA-HZ-7926 | MSS | PAAD |
| TCGA-HZ-8001 | MSS | PAAD |
| TCGA-HZ-8002 | MSS | PAAD |
| TCGA-HZ-8003 | MSS | PAAD |
| TCGA-HZ-8005 | MSS | PAAD |
| TCGA-HZ-8315 | MSS | PAAD |
| TCGA-HZ-8317 | MSS | PAAD |
| TCGA-HZ-8519 | MSS | PAAD |
| TCGA-HZ-8636 | MSS | PAAD |
| TCGA-HZ-8637 | MSS | PAAD |
| TCGA-HZ-8638 | MSS | PAAD |
| TCGA-HZ-A49H | MSS | PAAD |
| TCGA-HZ-A49I | MSS | PAAD |
| TCGA-HZ-A4BH | MSS | PAAD |
| TCGA-HZ-A4BK | MSS | PAAD |
| TCGA-HZ-A77O | MSS | PAAD |
| TCGA-HZ-A77P | MSS | PAAD |
| TCGA-HZ-A77Q | MSS | PAAD |
| TCGA-HZ-A8P0 | MSS | PAAD |
| TCGA-HZ-A8P1 | MSS | PAAD |
| TCGA-HZ-A9TJ | MSS | PAAD |
| TCGA-HZ-A9TJ | MSS | PAAD |
| TCGA-IA-A83S | MSS | KIRP |
| TCGA-IA-A83T | MSS | KIRP |
| TCGA-IA-A83V | MSS | KIRP |
| TCGA-IA-A83W | MSS | KIRP |
| TCGA-IB-7644 | MSS | PAAD |
| TCGA-IB-7645 | MSS | PAAD |
| TCGA-IB-7646 | MSS | PAAD |
| TCGA-IB-7647 | MSS | PAAD |
| TCGA-IB-7649 | MSS | PAAD |

|              |     |      |
|--------------|-----|------|
| TCGA-IB-7651 | MSS | PAAD |
| TCGA-IB-7652 | MSS | PAAD |
| TCGA-IB-7654 | MSS | PAAD |
| TCGA-IB-7885 | MSS | PAAD |
| TCGA-IB-7886 | MSS | PAAD |
| TCGA-IB-7887 | MSS | PAAD |
| TCGA-IB-7889 | MSS | PAAD |
| TCGA-IB-7890 | MSS | PAAD |
| TCGA-IB-7891 | MSS | PAAD |
| TCGA-IB-7893 | MSS | PAAD |
| TCGA-IB-7897 | MSS | PAAD |
| TCGA-IB-8126 | MSS | PAAD |
| TCGA-IB-8127 | MSS | PAAD |
| TCGA-IB-A5SO | MSS | PAAD |
| TCGA-IB-A5SP | MSS | PAAD |
| TCGA-IB-A5SQ | MSS | PAAD |
| TCGA-IB-A5SS | MSS | PAAD |
| TCGA-IB-A5ST | MSS | PAAD |
| TCGA-IB-A6UF | MSS | PAAD |
| TCGA-IB-A6UG | MSS | PAAD |
| TCGA-IB-A7LX | MSS | PAAD |
| TCGA-IB-A7M4 | MSS | PAAD |
| TCGA-IB-AAUM | MSS | PAAD |
| TCGA-IB-AAUN | MSS | PAAD |
| TCGA-IB-AAUO | MSS | PAAD |
| TCGA-IB-AAUP | MSS | PAAD |
| TCGA-IB-AAUQ | MSS | PAAD |
| TCGA-IB-AAUR | MSS | PAAD |
| TCGA-IB-AAUS | MSS | PAAD |
| TCGA-IB-AAUT | MSS | PAAD |
| TCGA-IB-AAUU | MSS | PAAD |
| TCGA-IB-AAUV | MSS | PAAD |
| TCGA-IB-AAUW | MSS | PAAD |
| TCGA-IC-A6RE | MSS | ESCA |
| TCGA-IC-A6RF | MSS | ESCA |
| TCGA-IE-A4EH | MSS | SARC |
| TCGA-IE-A6BZ | MSS | SARC |
| TCGA-IF-A4AK | MSS | SARC |
| TCGA-IG-A3YA | MSS | ESCA |
| TCGA-IG-A4P3 | MSS | ESCA |
| TCGA-IG-A4QT | MSS | ESCA |
| TCGA-IG-A51D | MSS | ESCA |
| TCGA-IG-A5S3 | MSS | ESCA |
| TCGA-IG-A625 | MSS | ESCA |
| TCGA-IG-A6QS | MSS | ESCA |
| TCGA-IG-A7DP | MSS | ESCA |
| TCGA-IG-A8O2 | MSS | ESCA |
| TCGA-IG-A97H | MSS | ESCA |
| TCGA-IG-A97I | MSS | ESCA |
| TCGA-IH-A3EA | MSS | SKCM |
| TCGA-IK-7675 | MSS | LGG  |
| TCGA-IM-A3EB | MSS | THCA |



|              |              |      |
|--------------|--------------|------|
| TCGA-IM-A3ED | MSS          | THCA |
| TCGA-IM-A3U2 | MSS          | THCA |
| TCGA-IM-A41Y | MSS          | THCA |
| TCGA-IM-A41Z | MSS          | THCA |
| TCGA-IM-A420 | Intermediate | THCA |
| TCGA-IM-A4EB | MSS          | THCA |
| TCGA-IN-7808 | MSS          | STAD |
| TCGA-IN-8462 | MSS          | STAD |
| TCGA-IN-8663 | MSS          | STAD |
| TCGA-IN-A6RI | MSS          | STAD |
| TCGA-IN-A6RJ | MSS          | STAD |
| TCGA-IN-A6RL | MSS          | STAD |
| TCGA-IN-A6RN | MSS          | STAD |
| TCGA-IN-A6RO | MSS          | STAD |
| TCGA-IN-A6RP | MSS          | STAD |
| TCGA-IN-A6RR | MSS          | STAD |
| TCGA-IN-A6RS | MSS          | STAD |
| TCGA-IN-A7NR | MSS          | STAD |
| TCGA-IN-A7NT | MSS          | STAD |
| TCGA-IN-A7NU | MSS          | STAD |
| TCGA-IN-AB1V | MSS          | STAD |
| TCGA-IN-AB1X | MSS          | STAD |
| TCGA-IQ-7630 | MSS          | HNSC |
| TCGA-IQ-7631 | MSS          | HNSC |
| TCGA-IQ-7632 | MSS          | HNSC |
| TCGA-IQ-A61E | MSS          | HNSC |
| TCGA-IQ-A61G | MSS          | HNSC |
| TCGA-IQ-A61H | MSS          | HNSC |
| TCGA-IQ-A61I | MSS          | HNSC |
| TCGA-IQ-A61J | MSS          | HNSC |
| TCGA-IQ-A61K | MSS          | HNSC |
| TCGA-IQ-A61L | MSS          | HNSC |
| TCGA-IQ-A61O | MSS          | HNSC |
| TCGA-IQ-A6SG | MSS          | HNSC |
| TCGA-IQ-A6SH | MSS          | HNSC |
| TCGA-IR-A3LF | MSS          | CESC |
| TCGA-IR-A3LK | MSS          | CESC |
| TCGA-IW-A3M6 | MSS          | SARC |
| TCGA-IZ-8195 | MSS          | KIRP |
| TCGA-IZ-8195 | MSI-H        | KIRP |
| TCGA-IZ-8196 | MSS          | KIRP |
| TCGA-IZ-A6M8 | MSS          | KIRP |
| TCGA-IZ-A6M9 | MSS          | KIRP |
| TCGA-J1-A4AH | MSS          | LUSC |
| TCGA-J2-8192 | MSS          | LUAD |
| TCGA-J2-A4AD | MSS          | LUAD |
| TCGA-J2-A4AE | MSS          | LUAD |
| TCGA-J2-A4AG | MSS          | LUAD |
| TCGA-J4-8200 | MSS          | PRAD |
| TCGA-J4-A67K | MSS          | PRAD |
| TCGA-J4-A67L | MSS          | PRAD |
| TCGA-J4-A67M | MSS          | PRAD |

|              |     |      |
|--------------|-----|------|
| TCGA-J4-A67N | MSS | PRAD |
| TCGA-J4-A67O | MSS | PRAD |
| TCGA-J4-A67Q | MSS | PRAD |
| TCGA-J4-A67R | MSS | PRAD |
| TCGA-J4-A67S | MSS | PRAD |
| TCGA-J4-A67T | MSS | PRAD |
| TCGA-J4-A6G1 | MSS | PRAD |
| TCGA-J4-A6G3 | MSS | PRAD |
| TCGA-J4-A6M7 | MSS | PRAD |
| TCGA-J4-A83I | MSS | PRAD |
| TCGA-J4-A83J | MSS | PRAD |
| TCGA-J4-A83K | MSS | PRAD |
| TCGA-J4-A83L | MSS | PRAD |
| TCGA-J4-A83M | MSS | PRAD |
| TCGA-J4-A83N | MSS | PRAD |
| TCGA-J4-AATV | MSS | PRAD |
| TCGA-J4-AATZ | MSS | PRAD |
| TCGA-J4-AAU2 | MSS | PRAD |
| TCGA-J7-6720 | MSS | KIRP |
| TCGA-J7-8537 | MSS | KIRP |
| TCGA-J7-A8I2 | MSS | KIRP |
| TCGA-J8-A3O2 | MSS | THCA |
| TCGA-J8-A3O2 | MSS | THCA |
| TCGA-J8-A3YD | MSS | THCA |
| TCGA-J8-A3YE | MSS | THCA |
| TCGA-J8-A3YF | MSS | THCA |
| TCGA-J8-A3YH | MSS | THCA |
| TCGA-J8-A3YH | MSS | THCA |
| TCGA-J8-A42S | MSS | THCA |
| TCGA-J8-A4HW | MSS | THCA |
| TCGA-J8-A4HW | MSS | THCA |
| TCGA-J8-A4HY | MSS | THCA |
| TCGA-J9-A52D | MSS | PRAD |
| TCGA-J9-A8CK | MSS | PRAD |
| TCGA-J9-A8CL | MSS | PRAD |
| TCGA-J9-A8CM | MSS | PRAD |
| TCGA-J9-A8CN | MSS | PRAD |
| TCGA-J9-A8CP | MSS | PRAD |
| TCGA-JL-A3YW | MSS | BRCA |
| TCGA-JL-A3YX | MSS | BRCA |
| TCGA-JU-AAVI | MSS | UCEC |
| TCGA-JV-A75J | MSS | SARC |
| TCGA-JW-A5VK | MSS | CESC |
| TCGA-JW-A852 | MSS | CESC |
| TCGA-JW-AAVH | MSS | CESC |
| TCGA-JY-A6FA | MSS | ESCA |
| TCGA-JY-A6FB | MSS | ESCA |
| TCGA-JY-A6FD | MSS | ESCA |
| TCGA-JY-A6FE | MSS | ESCA |
| TCGA-JY-A6FG | MSS | ESCA |
| TCGA-JY-A6FH | MSS | ESCA |
| TCGA-JY-A938 | MSS | ESCA |

|              |       |      |
|--------------|-------|------|
| TCGA-JY-A939 | MSS   | ESCA |
| TCGA-JY-A93C | MSS   | ESCA |
| TCGA-JY-A93D | MSS   | ESCA |
| TCGA-JY-A93E | MSS   | ESCA |
| TCGA-JY-A93F | MSS   | ESCA |
| TCGA-K1-A6RT | MSS   | SARC |
| TCGA-K1-A6RU | MSS   | SARC |
| TCGA-K1-A6RV | MSS   | SARC |
| TCGA-K4-A3WS | MSS   | BLCA |
| TCGA-K4-A3WU | MSS   | BLCA |
| TCGA-K4-A3WV | MSS   | BLCA |
| TCGA-K4-A4AB | MSS   | BLCA |
| TCGA-K4-A54R | MSS   | BLCA |
| TCGA-K4-A5RH | MSS   | BLCA |
| TCGA-K4-A5RI | MSS   | BLCA |
| TCGA-K4-A5RJ | MSS   | BLCA |
| TCGA-K4-A6FZ | MSS   | BLCA |
| TCGA-K4-A6MB | MSS   | BLCA |
| TCGA-K4-A83P | MSS   | BLCA |
| TCGA-K4-AAQO | MSS   | BLCA |
| TCGA-K7-A6G5 | MSS   | LIHC |
| TCGA-K7-AAU7 | MSS   | LIHC |
| TCGA-KB-A6F5 | MSS   | STAD |
| TCGA-KB-A6F7 | MSS   | STAD |
| TCGA-KB-A93G | MSS   | STAD |
| TCGA-KB-A93H | MSS   | STAD |
| TCGA-KB-A93J | MSS   | STAD |
| TCGA-KC-A4BL | MSS   | PRAD |
| TCGA-KC-A4BN | MSS   | PRAD |
| TCGA-KC-A4BO | MSS   | PRAD |
| TCGA-KC-A4BR | MSS   | PRAD |
| TCGA-KC-A7F3 | MSS   | PRAD |
| TCGA-KC-A7F5 | MSS   | PRAD |
| TCGA-KC-A7F6 | MSS   | PRAD |
| TCGA-KC-A7FA | MSS   | PRAD |
| TCGA-KC-A7FD | MSS   | PRAD |
| TCGA-KC-A7FE | MSS   | PRAD |
| TCGA-KH-A6WC | MSS   | ESCA |
| TCGA-KJ-A3U4 | MSS   | UCEC |
| TCGA-KK-A59V | MSI-H | PRAD |
| TCGA-KK-A59X | MSS   | PRAD |
| TCGA-KK-A59Z | MSS   | PRAD |
| TCGA-KK-A5A1 | MSS   | PRAD |
| TCGA-KK-A6DY | MSS   | PRAD |
| TCGA-KK-A6E0 | MSS   | PRAD |
| TCGA-KK-A6E1 | MSS   | PRAD |
| TCGA-KK-A6E2 | MSS   | PRAD |
| TCGA-KK-A6E3 | MSS   | PRAD |
| TCGA-KK-A6E4 | MSS   | PRAD |
| TCGA-KK-A6E5 | MSS   | PRAD |
| TCGA-KK-A6E6 | MSS   | PRAD |
| TCGA-KK-A6E7 | MSS   | PRAD |

|              |     |      |
|--------------|-----|------|
| TCGA-KK-A6E8 | MSS | PRAD |
| TCGA-KK-A7AP | MSS | PRAD |
| TCGA-KK-A7AQ | MSS | PRAD |
| TCGA-KK-A7AU | MSS | PRAD |
| TCGA-KK-A7AV | MSS | PRAD |
| TCGA-KK-A7AW | MSS | PRAD |
| TCGA-KK-A7AY | MSS | PRAD |
| TCGA-KK-A7AZ | MSS | PRAD |
| TCGA-KK-A7B0 | MSS | PRAD |
| TCGA-KK-A7B1 | MSS | PRAD |
| TCGA-KK-A7B2 | MSS | PRAD |
| TCGA-KK-A7B3 | MSS | PRAD |
| TCGA-KK-A7B4 | MSS | PRAD |
| TCGA-KK-A8I4 | MSS | PRAD |
| TCGA-KK-A8I5 | MSS | PRAD |
| TCGA-KK-A8I6 | MSS | PRAD |
| TCGA-KK-A8I7 | MSS | PRAD |
| TCGA-KK-A8I8 | MSS | PRAD |
| TCGA-KK-A8I9 | MSS | PRAD |
| TCGA-KK-A8IA | MSS | PRAD |
| TCGA-KK-A8IB | MSS | PRAD |
| TCGA-KK-A8IC | MSS | PRAD |
| TCGA-KK-A8ID | MSS | PRAD |
| TCGA-KK-A8IF | MSS | PRAD |
| TCGA-KK-A8IG | MSS | PRAD |
| TCGA-KK-A8IH | MSS | PRAD |
| TCGA-KK-A8II | MSS | PRAD |
| TCGA-KK-A8IJ | MSS | PRAD |
| TCGA-KK-A8IK | MSS | PRAD |
| TCGA-KK-A8IL | MSS | PRAD |
| TCGA-KK-A8IM | MSS | PRAD |
| TCGA-KL-8323 | MSS | KICH |
| TCGA-KL-8324 | MSS | KICH |
| TCGA-KL-8325 | MSS | KICH |
| TCGA-KL-8326 | MSS | KICH |
| TCGA-KL-8327 | MSS | KICH |
| TCGA-KL-8328 | MSS | KICH |
| TCGA-KL-8329 | MSS | KICH |
| TCGA-KL-8330 | MSS | KICH |
| TCGA-KL-8331 | MSS | KICH |
| TCGA-KL-8332 | MSS | KICH |
| TCGA-KL-8333 | MSS | KICH |
| TCGA-KL-8334 | MSS | KICH |
| TCGA-KL-8335 | MSS | KICH |
| TCGA-KL-8336 | MSS | KICH |
| TCGA-KL-8337 | MSS | KICH |
| TCGA-KL-8338 | MSS | KICH |
| TCGA-KL-8339 | MSS | KICH |
| TCGA-KL-8340 | MSS | KICH |
| TCGA-KL-8341 | MSS | KICH |
| TCGA-KL-8342 | MSS | KICH |
| TCGA-KL-8343 | MSS | KICH |

|              |     |      |
|--------------|-----|------|
| TCGA-KL-8344 | MSS | KICH |
| TCGA-KL-8345 | MSS | KICH |
| TCGA-KL-8346 | MSS | KICH |
| TCGA-KM-8438 | MSS | KICH |
| TCGA-KM-8439 | MSS | KICH |
| TCGA-KM-8440 | MSS | KICH |
| TCGA-KM-8441 | MSS | KICH |
| TCGA-KM-8442 | MSS | KICH |
| TCGA-KM-8443 | MSS | KICH |
| TCGA-KM-8476 | MSS | KICH |
| TCGA-KM-8477 | MSS | KICH |
| TCGA-KN-8418 | MSS | KICH |
| TCGA-KN-8419 | MSS | KICH |
| TCGA-KN-8421 | MSS | KICH |
| TCGA-KN-8422 | MSS | KICH |
| TCGA-KN-8423 | MSS | KICH |
| TCGA-KN-8424 | MSS | KICH |
| TCGA-KN-8425 | MSS | KICH |
| TCGA-KN-8426 | MSS | KICH |
| TCGA-KN-8427 | MSS | KICH |
| TCGA-KN-8428 | MSS | KICH |
| TCGA-KN-8429 | MSS | KICH |
| TCGA-KN-8430 | MSS | KICH |
| TCGA-KN-8431 | MSS | KICH |
| TCGA-KN-8432 | MSS | KICH |
| TCGA-KN-8433 | MSS | KICH |
| TCGA-KN-8434 | MSS | KICH |
| TCGA-KN-8435 | MSS | KICH |
| TCGA-KN-8436 | MSS | KICH |
| TCGA-KN-8437 | MSS | KICH |
| TCGA-KO-8403 | MSS | KICH |
| TCGA-KO-8404 | MSS | KICH |
| TCGA-KO-8405 | MSS | KICH |
| TCGA-KO-8406 | MSS | KICH |
| TCGA-KO-8407 | MSS | KICH |
| TCGA-KO-8408 | MSS | KICH |
| TCGA-KO-8409 | MSS | KICH |
| TCGA-KO-8410 | MSS | KICH |
| TCGA-KO-8411 | MSS | KICH |
| TCGA-KO-8413 | MSS | KICH |
| TCGA-KO-8414 | MSS | KICH |
| TCGA-KO-8415 | MSS | KICH |
| TCGA-KO-8416 | MSS | KICH |
| TCGA-KP-A3W3 | MSS | UCEC |
| TCGA-KP-A3W4 | MSS | UCEC |
| TCGA-KQ-A41N | MSS | BLCA |
| TCGA-KQ-A41O | MSS | BLCA |
| TCGA-KQ-A41P | MSS | BLCA |
| TCGA-KQ-A41Q | MSS | BLCA |
| TCGA-KQ-A41R | MSS | BLCA |
| TCGA-KQ-A41S | MSS | BLCA |
| TCGA-KR-A7K0 | MSS | LIHC |

|              |       |      |
|--------------|-------|------|
| TCGA-KR-A7K2 | MSS   | LIHC |
| TCGA-KR-A7K7 | MSS   | LIHC |
| TCGA-KR-A7K8 | MSS   | LIHC |
| TCGA-KS-A41F | MSS   | THCA |
| TCGA-KS-A41I | MSS   | THCA |
| TCGA-KS-A41J | MSS   | THCA |
| TCGA-KS-A41L | MSS   | THCA |
| TCGA-KS-A41I | MSS   | THCA |
| TCGA-KS-A413 | MSS   | THCA |
| TCGA-KS-A415 | MSS   | THCA |
| TCGA-KS-A417 | MSS   | THCA |
| TCGA-KS-A419 | MSS   | THCA |
| TCGA-KS-A41B | MSS   | THCA |
| TCGA-KS-A41C | MSS   | THCA |
| TCGA-KS-A41D | MSS   | THCA |
| TCGA-KT-A74X | MSS   | LGG  |
| TCGA-KT-A7W1 | MSS   | LGG  |
| TCGA-KU-A66S | MSS   | HNSC |
| TCGA-KU-A66T | MSS   | HNSC |
| TCGA-KU-A6H7 | MSS   | HNSC |
| TCGA-KU-A6H7 | MSS   | HNSC |
| TCGA-KU-A6H8 | MSS   | HNSC |
| TCGA-KV-A6GD | MSS   | KIRP |
| TCGA-KV-A6GE | MSS   | KIRP |
| TCGA-KV-A74V | MSS   | KIRP |
| TCGA-L1-A7W4 | MSS   | PAAD |
| TCGA-L3-A4E7 | MSS   | LUSC |
| TCGA-L3-A524 | MSS   | LUSC |
| TCGA-L4-A4E5 | MSS   | LUAD |
| TCGA-L4-A4E6 | MSS   | LUAD |
| TCGA-L5-A43J | MSI-H | ESCA |
| TCGA-L5-A4OE | MSS   | ESCA |
| TCGA-L5-A4OF | MSS   | ESCA |
| TCGA-L5-A4OG | MSS   | ESCA |
| TCGA-L5-A4OH | MSS   | ESCA |
| TCGA-L5-A4OI | MSI-H | ESCA |
| TCGA-L5-A4OM | MSS   | ESCA |
| TCGA-L5-A4ON | MSS   | ESCA |
| TCGA-L5-A4OO | MSS   | ESCA |
| TCGA-L5-A4OP | MSS   | ESCA |
| TCGA-L5-A4OS | MSS   | ESCA |
| TCGA-L5-A4OU | MSS   | ESCA |
| TCGA-L5-A4OX | MSS   | ESCA |
| TCGA-L5-A88S | MSS   | ESCA |
| TCGA-L5-A88T | MSS   | ESCA |
| TCGA-L5-A88V | MSS   | ESCA |
| TCGA-L5-A88W | MSS   | ESCA |
| TCGA-L5-A88Y | MSS   | ESCA |
| TCGA-L5-A88Z | MSS   | ESCA |
| TCGA-L5-A891 | MSS   | ESCA |
| TCGA-L5-A893 | MSS   | ESCA |
| TCGA-L5-A8NE | MSS   | ESCA |

|              |       |      |
|--------------|-------|------|
| TCGA-L5-A8NF | MSS   | ESCA |
| TCGA-L5-A8NG | MSS   | ESCA |
| TCGA-L5-A8NH | MSS   | ESCA |
| TCGA-L5-A8NI | MSS   | ESCA |
| TCGA-L5-A8NJ | MSS   | ESCA |
| TCGA-L5-A8NK | MSS   | ESCA |
| TCGA-L5-A8NL | MSS   | ESCA |
| TCGA-L5-A8NM | MSI-H | ESCA |
| TCGA-L5-A8NN | MSS   | ESCA |
| TCGA-L5-A8NQ | MSS   | ESCA |
| TCGA-L5-A8NR | MSS   | ESCA |
| TCGA-L5-A8NS | MSS   | ESCA |
| TCGA-L5-A8NT | MSS   | ESCA |
| TCGA-L5-A8NU | MSS   | ESCA |
| TCGA-L5-A8NV | MSS   | ESCA |
| TCGA-L5-A8NW | MSS   | ESCA |
| TCGA-L6-A4EQ | MSS   | THCA |
| TCGA-L6-A4ET | MSS   | THCA |
| TCGA-L6-A4EU | MSS   | THCA |
| TCGA-L7-A6VZ | MSS   | ESCA |
| TCGA-L9-A443 | MSS   | LUAD |
| TCGA-L9-A444 | MSS   | LUAD |
| TCGA-L9-A50W | MSS   | LUAD |
| TCGA-L9-A5IP | MSS   | LUAD |
| TCGA-L9-A743 | MSS   | LUAD |
| TCGA-L9-A7SV | MSS   | LUAD |
| TCGA-L9-A8F4 | MSS   | LUAD |
| TCGA-LA-A446 | MSS   | LUSC |
| TCGA-LA-A7SW | MSS   | LUSC |
| TCGA-LB-A7SX | MSS   | PAAD |
| TCGA-LB-A8F3 | MSS   | PAAD |
| TCGA-LB-A9Q5 | MSS   | PAAD |
| TCGA-LC-A66R | MSS   | BLCA |
| TCGA-LD-A66U | MSS   | BRCA |
| TCGA-LD-A74U | MSS   | BRCA |
| TCGA-LD-A7W5 | MSS   | BRCA |
| TCGA-LD-A7W6 | MSS   | BRCA |
| TCGA-LD-A9QF | MSS   | BRCA |
| TCGA-LG-A6GG | MSS   | LIHC |
| TCGA-LG-A9QC | MSS   | LIHC |
| TCGA-LG-A9QD | MSS   | LIHC |
| TCGA-LH-A9QB | MSS   | SKCM |
| TCGA-LI-A67I | MSS   | SARC |
| TCGA-LK-A4NW | MSS   | MESO |
| TCGA-LK-A4NY | MSS   | MESO |
| TCGA-LK-A4NZ | MSS   | MESO |
| TCGA-LK-A4O0 | MSS   | MESO |
| TCGA-LK-A4O2 | MSS   | MESO |
| TCGA-LK-A4O4 | MSS   | MESO |
| TCGA-LK-A4O5 | MSS   | MESO |
| TCGA-LK-A4O6 | MSS   | MESO |
| TCGA-LK-A4O7 | MSS   | MESO |

|              |     |      |
|--------------|-----|------|
| TCGA-LL-A5YL | MSS | BRCA |
| TCGA-LL-A5YM | MSS | BRCA |
| TCGA-LL-A5YN | MSS | BRCA |
| TCGA-LL-A6FP | MSS | BRCA |
| TCGA-LL-A6FQ | MSS | BRCA |
| TCGA-LL-A6FR | MSS | BRCA |
| TCGA-LL-A73Y | MSS | BRCA |
| TCGA-LL-A73Z | MSS | BRCA |
| TCGA-LL-A740 | MSS | BRCA |
| TCGA-LL-A7SZ | MSS | BRCA |
| TCGA-LL-A7T0 | MSS | BRCA |
| TCGA-LL-A8F5 | MSS | BRCA |
| TCGA-LL-A9Q3 | MSS | BRCA |
| TCGA-LN-A49P | MSS | ESCA |
| TCGA-LN-A49U | MSS | ESCA |
| TCGA-LN-A49X | MSS | ESCA |
| TCGA-LN-A4A2 | MSS | ESCA |
| TCGA-LN-A4A3 | MSS | ESCA |
| TCGA-LN-A4A4 | MSS | ESCA |
| TCGA-LN-A4A8 | MSS | ESCA |
| TCGA-LN-A4A9 | MSS | ESCA |
| TCGA-LN-A4MQ | MSS | ESCA |
| TCGA-LN-A5U5 | MSS | ESCA |
| TCGA-LN-A5U6 | MSS | ESCA |
| TCGA-LN-A5U7 | MSS | ESCA |
| TCGA-LN-A7HV | MSS | ESCA |
| TCGA-LN-A7HW | MSS | ESCA |
| TCGA-LN-A7HX | MSS | ESCA |
| TCGA-LN-A7HY | MSS | ESCA |
| TCGA-LN-A7HZ | MSS | ESCA |
| TCGA-LN-A8HZ | MSS | ESCA |
| TCGA-LN-A8I0 | MSS | ESCA |
| TCGA-LN-A8I1 | MSS | ESCA |
| TCGA-LN-A9FO | MSS | ESCA |
| TCGA-LN-A9FP | MSS | ESCA |
| TCGA-LN-A9FQ | MSS | ESCA |
| TCGA-LP-A7HU | MSS | CESC |
| TCGA-LQ-A4E4 | MSS | BRCA |
| TCGA-LT-A5Z6 | MSS | BLCA |
| TCGA-LT-A8JT | MSS | BLCA |
| TCGA-M7-A71Y | MSS | PRAD |
| TCGA-M7-A71Z | MSS | PRAD |
| TCGA-M7-A720 | MSS | PRAD |
| TCGA-M7-A721 | MSS | PRAD |
| TCGA-M7-A722 | MSS | PRAD |
| TCGA-M7-A723 | MSS | PRAD |
| TCGA-M7-A724 | MSS | PRAD |
| TCGA-M7-A725 | MSS | PRAD |
| TCGA-MA-AA3W | MSS | CESC |
| TCGA-MA-AA3X | MSS | CESC |
| TCGA-MA-AA3Y | MSS | CESC |
| TCGA-MA-AA3Z | MSS | CESC |



|              |              |      |
|--------------|--------------|------|
| TCGA-MA-AA41 | MSS          | CESC |
| TCGA-MA-AA42 | Intermediate | CESC |
| TCGA-MA-AA43 | MSS          | CESC |
| TCGA-MB-A5Y8 | MSS          | SARC |
| TCGA-MB-A8JK | MSS          | SARC |
| TCGA-MB-A8JL | MSS          | SARC |
| TCGA-MF-A522 | MSS          | LUSC |
| TCGA-MG-AAMC | MSS          | PRAD |
| TCGA-MH-A854 | MSS          | KIRP |
| TCGA-MH-A855 | MSS          | KIRP |
| TCGA-MH-A856 | MSS          | KIRP |
| TCGA-MH-A857 | MSS          | KIRP |
| TCGA-MI-A75C | MSS          | LIHC |
| TCGA-MI-A75E | MSS          | LIHC |
| TCGA-MI-A75G | MSS          | LIHC |
| TCGA-MI-A75H | MSS          | LIHC |
| TCGA-MI-A75I | MSS          | LIHC |
| TCGA-MJ-A68H | MSS          | SARC |
| TCGA-MJ-A68J | MSS          | SARC |
| TCGA-MJ-A850 | MSS          | SARC |
| TCGA-MK-A4N7 | MSS          | THCA |
| TCGA-MK-A4N9 | MSS          | THCA |
| TCGA-MK-A84Z | MSS          | THCA |
| TCGA-MM-A84U | MSS          | KIRC |
| TCGA-MN-A4N1 | MSS          | LUAD |
| TCGA-MN-A4N4 | MSS          | LUAD |
| TCGA-MN-A4N5 | MSS          | LUAD |
| TCGA-MO-A47P | MSS          | SARC |
| TCGA-MP-A4SV | MSS          | LUAD |
| TCGA-MP-A4SW | MSS          | LUAD |
| TCGA-MP-A4SY | MSS          | LUAD |
| TCGA-MP-A4T2 | MSS          | LUAD |
| TCGA-MP-A4T4 | MSS          | LUAD |
| TCGA-MP-A4T6 | MSS          | LUAD |
| TCGA-MP-A4T7 | MSS          | LUAD |
| TCGA-MP-A4T8 | MSS          | LUAD |
| TCGA-MP-A4T9 | MSS          | LUAD |
| TCGA-MP-A4TA | MSS          | LUAD |
| TCGA-MP-A4TC | MSS          | LUAD |
| TCGA-MP-A4TD | MSS          | LUAD |
| TCGA-MP-A4TE | MSS          | LUAD |
| TCGA-MP-A4TF | MSS          | LUAD |
| TCGA-MP-A4TH | MSS          | LUAD |
| TCGA-MP-A4TI | MSS          | LUAD |
| TCGA-MP-A4TJ | MSS          | LUAD |
| TCGA-MP-A4TK | MSS          | LUAD |
| TCGA-MP-A5C7 | MSS          | LUAD |
| TCGA-MQ-A4KX | MSS          | MESO |
| TCGA-MQ-A4LC | MSS          | MESO |
| TCGA-MQ-A4LI | MSS          | MESO |
| TCGA-MQ-A4LJ | MSS          | MESO |
| TCGA-MQ-A4LM | MSS          | MESO |

|              |       |      |
|--------------|-------|------|
| TCGA-MQ-A4LP | MSS   | MESO |
| TCGA-MQ-A4LV | MSS   | MESO |
| TCGA-MQ-A6BL | MSS   | MESO |
| TCGA-MQ-A6BQ | MSS   | MESO |
| TCGA-MQ-A6BR | MSS   | MESO |
| TCGA-MQ-A6BS | MSS   | MESO |
| TCGA-MR-A520 | MSS   | LIHC |
| TCGA-MR-A8JO | MSS   | LIHC |
| TCGA-MS-A51U | MSS   | BRCA |
| TCGA-MT-A51W | MSS   | HNSC |
| TCGA-MT-A51X | MSS   | HNSC |
| TCGA-MT-A67A | MSS   | HNSC |
| TCGA-MT-A67D | MSS   | HNSC |
| TCGA-MT-A67F | MSS   | HNSC |
| TCGA-MT-A67G | MSS   | HNSC |
| TCGA-MT-A7BN | MSS   | HNSC |
| TCGA-MU-A51Y | MSS   | CESC |
| TCGA-MU-A5YI | MSS   | CESC |
| TCGA-MU-A8JM | MSS   | CESC |
| TCGA-MX-A5UG | MSS   | STAD |
| TCGA-MX-A5UJ | MSI-H | STAD |
| TCGA-MX-A663 | MSS   | STAD |
| TCGA-MX-A666 | MSS   | STAD |
| TCGA-MY-A5BD | MSS   | CESC |
| TCGA-MY-A5BE | MSS   | CESC |
| TCGA-MY-A5BF | MSS   | CESC |
| TCGA-MY-A913 | MSS   | CESC |
| TCGA-MZ-A5BI | MSS   | HNSC |
| TCGA-MZ-A6I9 | MSS   | HNSC |
| TCGA-MZ-A7D7 | MSS   | HNSC |
| TCGA-N1-A6IA | MSS   | SARC |
| TCGA-N5-A4R8 | MSS   | UCS  |
| TCGA-N5-A4RA | MSS   | UCS  |
| TCGA-N5-A4RD | MSS   | UCS  |
| TCGA-N5-A4RF | MSS   | UCS  |
| TCGA-N5-A4RJ | MSS   | UCS  |
| TCGA-N5-A4RM | MSS   | UCS  |
| TCGA-N5-A4RN | MSS   | UCS  |
| TCGA-N5-A4RO | MSS   | UCS  |
| TCGA-N5-A4RS | MSS   | UCS  |
| TCGA-N5-A4RT | MSS   | UCS  |
| TCGA-N5-A4RU | MSS   | UCS  |
| TCGA-N5-A4RV | MSS   | UCS  |
| TCGA-N5-A59E | MSS   | UCS  |
| TCGA-N5-A59F | MSS   | UCS  |
| TCGA-N6-A4V9 | MSS   | UCS  |
| TCGA-N6-A4VC | MSS   | UCS  |
| TCGA-N6-A4VD | MSS   | UCS  |
| TCGA-N6-A4VE | MSS   | UCS  |
| TCGA-N6-A4VF | MSS   | UCS  |
| TCGA-N6-A4VG | MSS   | UCS  |
| TCGA-N7-A4Y0 | MSI-H | UCS  |

|              |              |      |
|--------------|--------------|------|
| TCGA-N7-A4Y5 | MSS          | UCS  |
| TCGA-N7-A4Y8 | MSS          | UCS  |
| TCGA-N7-A59B | MSS          | UCS  |
| TCGA-N8-A4PI | MSS          | UCS  |
| TCGA-N8-A4PL | MSS          | UCS  |
| TCGA-N8-A4PM | MSS          | UCS  |
| TCGA-N8-A4PN | MSS          | UCS  |
| TCGA-N8-A4PO | MSS          | UCS  |
| TCGA-N8-A4PP | MSS          | UCS  |
| TCGA-N8-A4PQ | MSS          | UCS  |
| TCGA-N8-A56S | MSS          | UCS  |
| TCGA-N9-A4PZ | MSS          | UCS  |
| TCGA-N9-A4Q1 | MSS          | UCS  |
| TCGA-N9-A4Q3 | MSS          | UCS  |
| TCGA-N9-A4Q4 | MSS          | UCS  |
| TCGA-N9-A4Q7 | MSS          | UCS  |
| TCGA-N9-A4Q8 | MSS          | UCS  |
| TCGA-NA-A4QV | MSS          | UCS  |
| TCGA-NA-A4QW | MSS          | UCS  |
| TCGA-NA-A4QX | MSS          | UCS  |
| TCGA-NA-A4QY | MSS          | UCS  |
| TCGA-NA-A4R0 | MSS          | UCS  |
| TCGA-NA-A4R1 | Intermediate | UCS  |
| TCGA-NA-A5I1 | MSS          | UCS  |
| TCGA-NC-A5HD | MSS          | LUSC |
| TCGA-NC-A5HE | MSS          | LUSC |
| TCGA-NC-A5HF | MSS          | LUSC |
| TCGA-NC-A5HG | MSS          | LUSC |
| TCGA-NC-A5HH | MSS          | LUSC |
| TCGA-NC-A5HI | MSS          | LUSC |
| TCGA-NC-A5HJ | MSS          | LUSC |
| TCGA-NC-A5HK | MSS          | LUSC |
| TCGA-NC-A5HL | MSS          | LUSC |
| TCGA-NC-A5HM | MSS          | LUSC |
| TCGA-NC-A5HN | MSS          | LUSC |
| TCGA-NC-A5HO | MSS          | LUSC |
| TCGA-NC-A5HP | MSS          | LUSC |
| TCGA-NC-A5HQ | MSS          | LUSC |
| TCGA-NC-A5HR | MSS          | LUSC |
| TCGA-NC-A5HT | MSS          | LUSC |
| TCGA-ND-A4W6 | MSS          | UCS  |
| TCGA-ND-A4WA | MSS          | UCS  |
| TCGA-ND-A4WC | MSS          | UCS  |
| TCGA-ND-A4WF | MSS          | UCS  |
| TCGA-NF-A4WU | MSS          | UCS  |
| TCGA-NF-A4WX | MSS          | UCS  |
| TCGA-NF-A4X2 | MSS          | UCS  |
| TCGA-NF-A5CP | MSS          | UCS  |
| TCGA-NG-A4VU | MSS          | UCS  |
| TCGA-NG-A4VW | MSS          | UCS  |
| TCGA-NH-A50U | MSS          | COAD |
| TCGA-NH-A5IV | MSI-H        | COAD |

|              |     |      |
|--------------|-----|------|
| TCGA-NH-A6GA | MSS | COAD |
| TCGA-NH-A6GB | MSS | COAD |
| TCGA-NH-A6GC | MSS | COAD |
| TCGA-NH-A8F7 | MSS | COAD |
| TCGA-NH-A8F7 | MSS | COAD |
| TCGA-NH-A8F8 | MSS | COAD |
| TCGA-NI-A8LF | MSS | LIHC |
| TCGA-NJ-A4YF | MSS | LUAD |
| TCGA-NJ-A4YG | MSS | LUAD |
| TCGA-NJ-A4YI | MSS | LUAD |
| TCGA-NJ-A4YP | MSS | LUAD |
| TCGA-NJ-A4YQ | MSS | LUAD |
| TCGA-NJ-A55A | MSS | LUAD |
| TCGA-NJ-A55O | MSS | LUAD |
| TCGA-NJ-A55R | MSS | LUAD |
| TCGA-NJ-A7XG | MSS | LUAD |
| TCGA-NK-A5CR | MSS | LUSC |
| TCGA-NK-A5CT | MSS | LUSC |
| TCGA-NK-A5CX | MSS | LUSC |
| TCGA-NK-A5D1 | MSS | LUSC |
| TCGA-NK-A7XE | MSS | LUSC |
| TCGA-NQ-A57I | MSS | MESO |
| TCGA-NQ-A638 | MSS | MESO |
| TCGA-O1-A52J | MSS | LUAD |
| TCGA-O2-A52N | MSS | LUSC |
| TCGA-O2-A52Q | MSS | LUSC |
| TCGA-O2-A52S | MSS | LUSC |
| TCGA-O2-A52V | MSS | LUSC |
| TCGA-O2-A5IB | MSS | LUSC |
| TCGA-O8-A75V | MSS | LIHC |
| TCGA-O9-A75Z | MSS | KIRP |
| TCGA-OD-A75X | MSS | SKCM |
| TCGA-OE-A75W | MSS | PAAD |
| TCGA-OL-A5RZ | MSS | BRCA |
| TCGA-OL-A66H | MSS | BRCA |
| TCGA-OL-A66I | MSS | BRCA |
| TCGA-OL-A66J | MSS | BRCA |
| TCGA-OL-A66K | MSS | BRCA |
| TCGA-OL-A66L | MSS | BRCA |
| TCGA-OL-A66N | MSS | BRCA |
| TCGA-OL-A66O | MSS | BRCA |
| TCGA-OL-A66P | MSS | BRCA |
| TCGA-OL-A6VO | MSS | BRCA |
| TCGA-OL-A6VQ | MSS | BRCA |
| TCGA-OL-A6VR | MSS | BRCA |
| TCGA-OL-A97C | MSS | BRCA |
| TCGA-OX-A56R | MSS | GBM  |
| TCGA-OY-A56P | MSS | OV   |
| TCGA-OY-A56Q | MSS | OV   |
| TCGA-P3-A5Q5 | MSS | HNSC |
| TCGA-P3-A5Q6 | MSS | HNSC |
| TCGA-P3-A5QA | MSS | HNSC |

|              |     |      |
|--------------|-----|------|
| TCGA-P3-A5QE | MSS | HNSC |
| TCGA-P3-A5QF | MSS | HNSC |
| TCGA-P3-A6SW | MSS | HNSC |
| TCGA-P3-A6SX | MSS | HNSC |
| TCGA-P3-A6T0 | MSS | HNSC |
| TCGA-P3-A6T2 | MSS | HNSC |
| TCGA-P3-A6T3 | MSS | HNSC |
| TCGA-P3-A6T4 | MSS | HNSC |
| TCGA-P3-A6T5 | MSS | HNSC |
| TCGA-P3-A6T6 | MSS | HNSC |
| TCGA-P3-A6T7 | MSS | HNSC |
| TCGA-P3-A6T8 | MSS | HNSC |
| TCGA-P4-AAVK | MSS | KIRP |
| TCGA-P4-AAVL | MSS | KIRP |
| TCGA-P4-AAVM | MSS | KIRP |
| TCGA-P4-AAVO | MSS | KIRP |
| TCGA-P5-A5ET | MSS | LGG  |
| TCGA-P5-A5EU | MSS | LGG  |
| TCGA-P5-A5EV | MSS | LGG  |
| TCGA-P5-A5EW | MSS | LGG  |
| TCGA-P5-A5EX | MSS | LGG  |
| TCGA-P5-A5EY | MSS | LGG  |
| TCGA-P5-A5EZ | MSS | LGG  |
| TCGA-P5-A5F0 | MSS | LGG  |
| TCGA-P5-A5F1 | MSS | LGG  |
| TCGA-P5-A5F2 | MSS | LGG  |
| TCGA-P5-A5F4 | MSS | LGG  |
| TCGA-P5-A5F6 | MSS | LGG  |
| TCGA-P5-A72U | MSS | LGG  |
| TCGA-P5-A72W | MSS | LGG  |
| TCGA-P5-A72X | MSS | LGG  |
| TCGA-P5-A72Z | MSS | LGG  |
| TCGA-P5-A730 | MSS | LGG  |
| TCGA-P5-A731 | MSS | LGG  |
| TCGA-P5-A733 | MSS | LGG  |
| TCGA-P5-A735 | MSS | LGG  |
| TCGA-P5-A736 | MSS | LGG  |
| TCGA-P5-A737 | MSS | LGG  |
| TCGA-P5-A77W | MSS | LGG  |
| TCGA-P5-A77X | MSS | LGG  |
| TCGA-P5-A780 | MSS | LGG  |
| TCGA-P5-A781 | MSS | LGG  |
| TCGA-P7-A5NX | MSS | PCPG |
| TCGA-P7-A5NY | MSS | PCPG |
| TCGA-P7-A5NY | MSS | PCPG |
| TCGA-P8-A5KC | MSS | PCPG |
| TCGA-P8-A5KD | MSS | PCPG |
| TCGA-P8-A6RX | MSS | PCPG |
| TCGA-P8-A6RY | MSS | PCPG |
| TCGA-PC-A5DK | MSS | SARC |
| TCGA-PC-A5DL | MSS | SARC |
| TCGA-PC-A5DM | MSS | SARC |

|              |       |      |
|--------------|-------|------|
| TCGA-PC-A5DN | MSS   | SARC |
| TCGA-PC-A5DP | MSS   | SARC |
| TCGA-PE-A5DD | MSS   | BRCA |
| TCGA-PG-A5BC | MSS   | UCEC |
| TCGA-PG-A6IB | MSI-H | UCEC |
| TCGA-PG-A7D5 | MSS   | UCEC |
| TCGA-PG-A914 | MSS   | UCEC |
| TCGA-PG-A915 | MSS   | UCEC |
| TCGA-PG-A916 | MSS   | UCEC |
| TCGA-PG-A917 | MSI-H | UCEC |
| TCGA-PJ-A8JU | MSS   | KIRP |
| TCGA-PL-A8LV | MSS   | BRCA |
| TCGA-PL-A8LX | MSS   | BRCA |
| TCGA-PL-A8LY | MSS   | BRCA |
| TCGA-PL-A8LZ | MSS   | BRCA |
| TCGA-PN-A8MA | MSS   | CESC |
| TCGA-PQ-A6FI | MSS   | BLCA |
| TCGA-PQ-A6FN | MSS   | BLCA |
| TCGA-PR-A5PF | MSS   | PCPG |
| TCGA-PR-A5PG | MSS   | PCPG |
| TCGA-PR-A5PH | MSS   | PCPG |
| TCGA-PZ-A5RE | MSS   | PAAD |
| TCGA-Q1-A6DT | MSS   | CESC |
| TCGA-Q1-A6DV | MSS   | CESC |
| TCGA-Q1-A6DW | MSS   | CESC |
| TCGA-Q1-A73O | MSS   | CESC |
| TCGA-Q1-A73P | MSS   | CESC |
| TCGA-Q1-A73Q | MSS   | CESC |
| TCGA-Q1-A73R | MSS   | CESC |
| TCGA-Q1-A73S | MSS   | CESC |
| TCGA-Q3-A5QY | MSS   | PAAD |
| TCGA-Q3-AA2A | MSS   | PAAD |
| TCGA-Q9-A6FU | MSS   | ESCA |
| TCGA-Q9-A6FW | MSS   | ESCA |
| TCGA-QA-A7B7 | MSS   | LIHC |
| TCGA-QB-A6FS | MSS   | SKCM |
| TCGA-QB-AA9O | MSS   | SKCM |
| TCGA-QC-A6FX | MSS   | SARC |
| TCGA-QC-A7B5 | MSS   | SARC |
| TCGA-QC-AA9N | MSS   | SARC |
| TCGA-QD-A8IV | MSS   | THCA |
| TCGA-QF-A5YS | MSS   | UCEC |
| TCGA-QF-A5YT | MSS   | UCEC |
| TCGA-QG-A5Z2 | MSI-H | COAD |
| TCGA-QH-A65R | MSS   | LGG  |
| TCGA-QH-A65S | MSS   | LGG  |
| TCGA-QH-A65V | MSS   | LGG  |
| TCGA-QH-A65X | MSS   | LGG  |
| TCGA-QH-A65Z | MSS   | LGG  |
| TCGA-QH-A6CS | MSS   | LGG  |
| TCGA-QH-A6CU | MSS   | LGG  |
| TCGA-QH-A6CV | MSS   | LGG  |

|              |       |      |
|--------------|-------|------|
| TCGA-QH-A6CW | MSS   | LGG  |
| TCGA-QH-A6CX | MSS   | LGG  |
| TCGA-QH-A6CY | MSS   | LGG  |
| TCGA-QH-A6CZ | MSS   | LGG  |
| TCGA-QH-A6X3 | MSS   | LGG  |
| TCGA-QH-A6X4 | MSS   | LGG  |
| TCGA-QH-A6X5 | MSS   | LGG  |
| TCGA-QH-A6X8 | MSS   | LGG  |
| TCGA-QH-A6X9 | MSS   | LGG  |
| TCGA-QH-A6XA | MSS   | LGG  |
| TCGA-QH-A6XC | MSS   | LGG  |
| TCGA-QH-A86X | MSS   | LGG  |
| TCGA-QH-A870 | MSS   | LGG  |
| TCGA-QK-A64Z | MSS   | HNSC |
| TCGA-QK-A652 | MSS   | HNSC |
| TCGA-QK-A61F | MSS   | HNSC |
| TCGA-QK-A61G | MSS   | HNSC |
| TCGA-QK-A61H | MSS   | HNSC |
| TCGA-QK-A61I | MSS   | HNSC |
| TCGA-QK-A61J | MSS   | HNSC |
| TCGA-QK-A6V9 | MSS   | HNSC |
| TCGA-QK-A6VB | MSI-H | HNSC |
| TCGA-QK-A6VC | MSS   | HNSC |
| TCGA-QK-A8Z7 | MSS   | HNSC |
| TCGA-QK-A8Z8 | MSS   | HNSC |
| TCGA-QK-A8Z9 | MSS   | HNSC |
| TCGA-QK-A8ZA | MSS   | HNSC |
| TCGA-QK-A8ZB | MSS   | HNSC |
| TCGA-QK-AA3J | MSS   | HNSC |
| TCGA-QK-AA3K | MSS   | HNSC |
| TCGA-QL-A97D | MSS   | COAD |
| TCGA-QM-A5NM | MSS   | UCS  |
| TCGA-QN-A5NN | MSS   | UCS  |
| TCGA-QQ-A5V2 | MSS   | SARC |
| TCGA-QQ-A5V9 | MSS   | SARC |
| TCGA-QQ-A5VA | MSS   | SARC |
| TCGA-QQ-A5VB | MSS   | SARC |
| TCGA-QQ-A5VC | MSS   | SARC |
| TCGA-QQ-A5VD | MSS   | SARC |
| TCGA-QQ-A8VB | MSS   | SARC |
| TCGA-QQ-A8VD | MSS   | SARC |
| TCGA-QQ-A8VF | MSI-H | SARC |
| TCGA-QQ-A8VG | MSS   | SARC |
| TCGA-QQ-A8VH | MSS   | SARC |
| TCGA-QR-A6GO | MSS   | PCPG |
| TCGA-QR-A6GR | MSS   | PCPG |
| TCGA-QR-A6GS | MSS   | PCPG |
| TCGA-QR-A6GT | MSS   | PCPG |
| TCGA-QR-A6GU | MSS   | PCPG |
| TCGA-QR-A6GW | MSS   | PCPG |
| TCGA-QR-A6GX | MSS   | PCPG |
| TCGA-QR-A6GY | MSS   | PCPG |

|              |       |      |
|--------------|-------|------|
| TCGA-QR-A6GZ | MSS   | PCPG |
| TCGA-QR-A6GZ | MSS   | PCPG |
| TCGA-QR-A6H0 | MSS   | PCPG |
| TCGA-QR-A6H1 | MSS   | PCPG |
| TCGA-QR-A6H2 | MSS   | PCPG |
| TCGA-QR-A6H3 | MSS   | PCPG |
| TCGA-QR-A6H4 | MSS   | PCPG |
| TCGA-QR-A6H5 | MSS   | PCPG |
| TCGA-QR-A6H6 | MSS   | PCPG |
| TCGA-QR-A6ZZ | MSS   | PCPG |
| TCGA-QR-A700 | MSS   | PCPG |
| TCGA-QR-A702 | MSS   | PCPG |
| TCGA-QR-A703 | MSS   | PCPG |
| TCGA-QR-A705 | MSS   | PCPG |
| TCGA-QR-A706 | MSS   | PCPG |
| TCGA-QR-A707 | MSS   | PCPG |
| TCGA-QR-A708 | MSS   | PCPG |
| TCGA-QR-A70A | MSS   | PCPG |
| TCGA-QR-A70C | MSS   | PCPG |
| TCGA-QR-A70D | MSS   | PCPG |
| TCGA-QR-A70E | MSS   | PCPG |
| TCGA-QR-A70G | MSS   | PCPG |
| TCGA-QR-A70H | MSS   | PCPG |
| TCGA-QR-A70I | MSS   | PCPG |
| TCGA-QR-A70J | MSS   | PCPG |
| TCGA-QR-A70K | MSS   | PCPG |
| TCGA-QR-A70M | MSS   | PCPG |
| TCGA-QR-A70N | MSS   | PCPG |
| TCGA-QR-A70O | MSS   | PCPG |
| TCGA-QR-A70P | MSS   | PCPG |
| TCGA-QR-A70Q | MSS   | PCPG |
| TCGA-QR-A70R | MSS   | PCPG |
| TCGA-QR-A70T | MSS   | PCPG |
| TCGA-QR-A70U | MSS   | PCPG |
| TCGA-QR-A70V | MSS   | PCPG |
| TCGA-QR-A70W | MSS   | PCPG |
| TCGA-QR-A70X | MSS   | PCPG |
| TCGA-QR-A7IN | MSS   | PCPG |
| TCGA-QR-A7IP | MSS   | PCPG |
| TCGA-QS-A5YR | MSI-H | UCEC |
| TCGA-QS-A744 | MSS   | UCEC |
| TCGA-QS-A8F1 | MSS   | UCEC |
| TCGA-QT-A5XJ | MSS   | PCPG |
| TCGA-QT-A5XK | MSS   | PCPG |
| TCGA-QT-A5XL | MSS   | PCPG |
| TCGA-QT-A5XM | MSS   | PCPG |
| TCGA-QT-A5XN | MSS   | PCPG |
| TCGA-QT-A5XO | MSS   | PCPG |
| TCGA-QT-A5XP | MSS   | PCPG |
| TCGA-QT-A69Q | MSS   | PCPG |
| TCGA-QT-A7U0 | MSS   | PCPG |
| TCGA-QU-A6IL | MSS   | PRAD |



|              |       |      |
|--------------|-------|------|
| TCGA-QU-A6IM | MSS   | PRAD |
| TCGA-QU-A6IN | MSS   | PRAD |
| TCGA-QU-A6IO | MSS   | PRAD |
| TCGA-QU-A6IP | MSS   | PRAD |
| TCGA-R2-A69V | MSS   | CESC |
| TCGA-R3-A69X | MSS   | BLCA |
| TCGA-R5-A7O7 | MSS   | STAD |
| TCGA-R5-A7ZE | MSS   | STAD |
| TCGA-R5-A7ZF | MSS   | STAD |
| TCGA-R5-A7ZI | MSI-H | STAD |
| TCGA-R5-A7ZR | MSS   | STAD |
| TCGA-R5-A804 | MSS   | STAD |
| TCGA-R5-A805 | MSS   | STAD |
| TCGA-R6-A6DN | MSS   | ESCA |
| TCGA-R6-A6DQ | MSS   | ESCA |
| TCGA-R6-A6KZ | MSS   | ESCA |
| TCGA-R6-A6L4 | MSS   | ESCA |
| TCGA-R6-A6L6 | MSS   | ESCA |
| TCGA-R6-A6XG | MSS   | ESCA |
| TCGA-R6-A6Y0 | MSS   | ESCA |
| TCGA-R6-A6Y2 | MSS   | ESCA |
| TCGA-R6-A8W5 | MSS   | ESCA |
| TCGA-R6-A8W8 | MSS   | ESCA |
| TCGA-R6-A8WC | MSS   | ESCA |
| TCGA-R6-A8WG | MSS   | ESCA |
| TCGA-R8-A6MK | MSS   | LGG  |
| TCGA-R8-A6ML | MSS   | LGG  |
| TCGA-R8-A6MO | MSS   | LGG  |
| TCGA-R8-A6YH | MSS   | LGG  |
| TCGA-R8-A73M | MSS   | LGG  |
| TCGA-RA-A741 | MSS   | CESC |
| TCGA-RB-A7B8 | MSS   | PAAD |
| TCGA-RB-AA9M | MSS   | PAAD |
| TCGA-RC-A6M3 | MSS   | LIHC |
| TCGA-RC-A6M4 | MSS   | LIHC |
| TCGA-RC-A6M5 | MSS   | LIHC |
| TCGA-RC-A6M6 | MSS   | LIHC |
| TCGA-RC-A7S9 | MSS   | LIHC |
| TCGA-RC-A7SB | MSS   | LIHC |
| TCGA-RC-A7SF | MSS   | LIHC |
| TCGA-RC-A7SH | MSS   | LIHC |
| TCGA-RC-A7SK | MSS   | LIHC |
| TCGA-RD-A7BS | MSS   | STAD |
| TCGA-RD-A7BT | MSS   | STAD |
| TCGA-RD-A7BW | MSS   | STAD |
| TCGA-RD-A7C1 | MSS   | STAD |
| TCGA-RD-A8MV | MSS   | STAD |
| TCGA-RD-A8MW | MSS   | STAD |
| TCGA-RD-A8N0 | MSS   | STAD |
| TCGA-RD-A8N1 | MSS   | STAD |
| TCGA-RD-A8N2 | MSS   | STAD |
| TCGA-RD-A8N4 | MSS   | STAD |

|              |       |      |
|--------------|-------|------|
| TCGA-RD-A8N5 | MSS   | STAD |
| TCGA-RD-A8N6 | MSS   | STAD |
| TCGA-RD-A8N9 | MSS   | STAD |
| TCGA-RD-A8NB | MSI-H | STAD |
| TCGA-RE-A7BO | MSS   | ESCA |
| TCGA-RG-A7D4 | MSS   | LIHC |
| TCGA-RL-AAAS | MSS   | PAAD |
| TCGA-RM-A68T | MSS   | PCPG |
| TCGA-RM-A68W | MSS   | PCPG |
| TCGA-RN-A68Q | MSS   | SARC |
| TCGA-RN-AAAQ | MSS   | SARC |
| TCGA-RP-A690 | MSS   | SKCM |
| TCGA-RP-A693 | MSS   | SKCM |
| TCGA-RP-A694 | MSS   | SKCM |
| TCGA-RP-A695 | MSS   | SKCM |
| TCGA-RP-A6K9 | MSS   | SKCM |
| TCGA-RQ-A68N | MSS   | DLBC |
| TCGA-RQ-A6JB | MSS   | DLBC |
| TCGA-RQ-AAAT | MSS   | DLBC |
| TCGA-RR-A6KA | MSS   | GBM  |
| TCGA-RR-A6KB | MSS   | GBM  |
| TCGA-RR-A6KC | MSS   | GBM  |
| TCGA-RS-A6TO | MSS   | HNSC |
| TCGA-RS-A6TP | MSS   | HNSC |
| TCGA-RT-A6Y9 | MSS   | PCPG |
| TCGA-RT-A6YA | MSS   | PCPG |
| TCGA-RT-A6YC | MSS   | PCPG |
| TCGA-RU-A8FL | MSS   | COAD |
| TCGA-RW-A67V | MSS   | PCPG |
| TCGA-RW-A67W | MSS   | PCPG |
| TCGA-RW-A67X | MSS   | PCPG |
| TCGA-RW-A67Y | MSS   | PCPG |
| TCGA-RW-A680 | MSS   | PCPG |
| TCGA-RW-A681 | MSS   | PCPG |
| TCGA-RW-A684 | MSS   | PCPG |
| TCGA-RW-A685 | MSS   | PCPG |
| TCGA-RW-A686 | MSS   | PCPG |
| TCGA-RW-A686 | MSS   | PCPG |
| TCGA-RW-A688 | MSS   | PCPG |
| TCGA-RW-A689 | MSS   | PCPG |
| TCGA-RW-A68A | MSS   | PCPG |
| TCGA-RW-A68B | MSS   | PCPG |
| TCGA-RW-A68C | MSS   | PCPG |
| TCGA-RW-A68D | MSS   | PCPG |
| TCGA-RW-A68F | MSS   | PCPG |
| TCGA-RW-A68G | MSS   | PCPG |
| TCGA-RW-A7CZ | MSS   | PCPG |
| TCGA-RW-A7D0 | MSS   | PCPG |
| TCGA-RW-A8AZ | MSS   | PCPG |
| TCGA-RX-A8JQ | MSS   | PCPG |
| TCGA-RY-A83X | MSS   | LGG  |
| TCGA-RY-A83Y | MSS   | LGG  |

|              |     |      |
|--------------|-----|------|
| TCGA-RY-A83Z | MSS | LGG  |
| TCGA-RY-A840 | MSS | LGG  |
| TCGA-RY-A843 | MSS | LGG  |
| TCGA-RY-A845 | MSS | LGG  |
| TCGA-RY-A847 | MSS | LGG  |
| TCGA-RZ-AB0B | MSS | UVM  |
| TCGA-S2-AA1A | MSS | LUAD |
| TCGA-S3-A6ZF | MSS | BRCA |
| TCGA-S3-A6ZG | MSS | BRCA |
| TCGA-S3-A6ZH | MSS | BRCA |
| TCGA-S3-AA0Z | MSS | BRCA |
| TCGA-S3-AA10 | MSS | BRCA |
| TCGA-S3-AA11 | MSS | BRCA |
| TCGA-S3-AA12 | MSS | BRCA |
| TCGA-S3-AA14 | MSS | BRCA |
| TCGA-S3-AA15 | MSS | BRCA |
| TCGA-S3-AA17 | MSS | BRCA |
| TCGA-S4-A8RM | MSS | PAAD |
| TCGA-S4-A8RO | MSS | PAAD |
| TCGA-S4-A8RP | MSS | PAAD |
| TCGA-S5-A6DX | MSS | BLCA |
| TCGA-S5-AA26 | MSS | BLCA |
| TCGA-S6-A8JW | MSS | TGCT |
| TCGA-S6-A8JX | MSS | TGCT |
| TCGA-S6-A8JY | MSS | TGCT |
| TCGA-S7-A7WL | MSS | PCPG |
| TCGA-S7-A7WM | MSS | PCPG |
| TCGA-S7-A7WN | MSS | PCPG |
| TCGA-S7-A7WO | MSS | PCPG |
| TCGA-S7-A7WP | MSS | PCPG |
| TCGA-S7-A7WQ | MSS | PCPG |
| TCGA-S7-A7WR | MSS | PCPG |
| TCGA-S7-A7WT | MSS | PCPG |
| TCGA-S7-A7WU | MSS | PCPG |
| TCGA-S7-A7WV | MSS | PCPG |
| TCGA-S7-A7WW | MSS | PCPG |
| TCGA-S7-A7WX | MSS | PCPG |
| TCGA-S7-A7X0 | MSS | PCPG |
| TCGA-S7-A7X1 | MSS | PCPG |
| TCGA-S7-A7X2 | MSS | PCPG |
| TCGA-S8-A6BV | MSS | ESCA |
| TCGA-S8-A6BW | MSS | ESCA |
| TCGA-S9-A6TS | MSS | LGG  |
| TCGA-S9-A6TU | MSS | LGG  |
| TCGA-S9-A6TV | MSS | LGG  |
| TCGA-S9-A6TW | MSS | LGG  |
| TCGA-S9-A6TX | MSS | LGG  |
| TCGA-S9-A6TY | MSS | LGG  |
| TCGA-S9-A6TZ | MSS | LGG  |
| TCGA-S9-A6U0 | MSS | LGG  |
| TCGA-S9-A6U1 | MSS | LGG  |
| TCGA-S9-A6U2 | MSS | LGG  |

|              |     |      |
|--------------|-----|------|
| TCGA-S9-A6U5 | MSS | LGG  |
| TCGA-S9-A6U6 | MSS | LGG  |
| TCGA-S9-A6U8 | MSS | LGG  |
| TCGA-S9-A6U9 | MSS | LGG  |
| TCGA-S9-A6UA | MSS | LGG  |
| TCGA-S9-A6UB | MSS | LGG  |
| TCGA-S9-A6WE | MSS | LGG  |
| TCGA-S9-A6WG | MSS | LGG  |
| TCGA-S9-A6WH | MSS | LGG  |
| TCGA-S9-A6WI | MSS | LGG  |
| TCGA-S9-A6WL | MSS | LGG  |
| TCGA-S9-A6WM | MSS | LGG  |
| TCGA-S9-A6WN | MSS | LGG  |
| TCGA-S9-A6WO | MSS | LGG  |
| TCGA-S9-A6WP | MSS | LGG  |
| TCGA-S9-A6WQ | MSS | LGG  |
| TCGA-S9-A7IQ | MSS | LGG  |
| TCGA-S9-A7IS | MSS | LGG  |
| TCGA-S9-A7IX | MSS | LGG  |
| TCGA-S9-A7IY | MSS | LGG  |
| TCGA-S9-A7IZ | MSS | LGG  |
| TCGA-S9-A7J0 | MSS | LGG  |
| TCGA-S9-A7J1 | MSS | LGG  |
| TCGA-S9-A7J2 | MSS | LGG  |
| TCGA-S9-A7J3 | MSS | LGG  |
| TCGA-S9-A7QW | MSS | LGG  |
| TCGA-S9-A7QX | MSS | LGG  |
| TCGA-S9-A7QY | MSS | LGG  |
| TCGA-S9-A7QZ | MSS | LGG  |
| TCGA-S9-A7R1 | MSS | LGG  |
| TCGA-S9-A7R2 | MSS | LGG  |
| TCGA-S9-A7R3 | MSS | LGG  |
| TCGA-S9-A7R4 | MSS | LGG  |
| TCGA-S9-A7R7 | MSS | LGG  |
| TCGA-S9-A7R8 | MSS | LGG  |
| TCGA-S9-A89V | MSS | LGG  |
| TCGA-S9-A89Z | MSS | LGG  |
| TCGA-SA-A6C2 | MSS | PCPG |
| TCGA-SB-A6J6 | MSS | TGCT |
| TCGA-SB-A76C | MSS | TGCT |
| TCGA-SC-A6LM | MSS | MESO |
| TCGA-SC-A6LN | MSS | MESO |
| TCGA-SC-A6LP | MSS | MESO |
| TCGA-SC-A6LQ | MSS | MESO |
| TCGA-SC-A6LR | MSS | MESO |
| TCGA-SC-AA5Z | MSS | MESO |
| TCGA-SG-A6Z4 | MSS | SARC |
| TCGA-SG-A6Z7 | MSS | SARC |
| TCGA-SG-A849 | MSS | SARC |
| TCGA-SH-A7BC | MSS | MESO |
| TCGA-SH-A7BD | MSS | MESO |
| TCGA-SH-A7BH | MSS | MESO |

|              |       |      |
|--------------|-------|------|
| TCGA-SI-A71O | MSS   | SARC |
| TCGA-SI-A71O | MSS   | SARC |
| TCGA-SI-A71P | MSS   | SARC |
| TCGA-SI-A71Q | MSS   | SARC |
| TCGA-SI-AA8B | MSS   | SARC |
| TCGA-SI-AA8C | MSS   | SARC |
| TCGA-SJ-A6ZI | MSI-H | UCEC |
| TCGA-SJ-A6ZJ | MSS   | UCEC |
| TCGA-SL-A6J9 | MSS   | UCEC |
| TCGA-SL-A6JA | MSI-H | UCEC |
| TCGA-SN-A6IS | MSS   | TGCT |
| TCGA-SN-A84W | MSS   | TGCT |
| TCGA-SN-A84X | MSS   | TGCT |
| TCGA-SN-A84Y | MSS   | TGCT |
| TCGA-SO-A8JP | MSS   | TGCT |
| TCGA-SP-A6QC | MSS   | PCPG |
| TCGA-SP-A6QD | MSS   | PCPG |
| TCGA-SP-A6QF | MSS   | PCPG |
| TCGA-SP-A6QG | MSS   | PCPG |
| TCGA-SP-A6QH | MSS   | PCPG |
| TCGA-SP-A6QI | MSS   | PCPG |
| TCGA-SP-A6QJ | MSS   | PCPG |
| TCGA-SP-A6QK | MSS   | PCPG |
| TCGA-SQ-A6I4 | MSS   | PCPG |
| TCGA-SQ-A6I6 | MSS   | PCPG |
| TCGA-SR-A6MP | MSS   | PCPG |
| TCGA-SR-A6MQ | MSS   | PCPG |
| TCGA-SR-A6MR | MSS   | PCPG |
| TCGA-SR-A6MS | MSS   | PCPG |
| TCGA-SR-A6MT | MSS   | PCPG |
| TCGA-SR-A6MU | MSS   | PCPG |
| TCGA-SR-A6MV | MSS   | PCPG |
| TCGA-SR-A6MX | MSS   | PCPG |
| TCGA-SR-A6MX | MSS   | PCPG |
| TCGA-SR-A6MX | MSS   | PCPG |
| TCGA-SR-A6MY | MSS   | PCPG |
| TCGA-SR-A6MZ | MSS   | PCPG |
| TCGA-SR-A6N0 | MSS   | PCPG |
| TCGA-SS-A7HO | MSS   | COAD |
| TCGA-SU-A7E7 | MSS   | PRAD |
| TCGA-SW-A7EA | MSI-H | STAD |
| TCGA-SW-A7EB | MSS   | STAD |
| TCGA-SX-A71R | MSS   | KIRP |
| TCGA-SX-A71S | MSS   | KIRP |
| TCGA-SX-A71U | MSS   | KIRP |
| TCGA-SX-A71V | MSS   | KIRP |
| TCGA-SX-A71W | MSS   | KIRP |
| TCGA-SX-A7SL | MSS   | KIRP |
| TCGA-SX-A7SM | MSS   | KIRP |
| TCGA-SX-A7SN | MSS   | KIRP |
| TCGA-SX-A7SO | MSS   | KIRP |
| TCGA-SX-A7SP | MSS   | KIRP |

|              |     |      |
|--------------|-----|------|
| TCGA-SX-A7SQ | MSS | KIRP |
| TCGA-SX-A7SR | MSS | KIRP |
| TCGA-SX-A7SS | MSS | KIRP |
| TCGA-SX-A7SU | MSS | KIRP |
| TCGA-SY-A9G0 | MSS | BLCA |
| TCGA-SY-A9G5 | MSS | BLCA |
| TCGA-T1-A6J8 | MSS | LIHC |
| TCGA-T2-A6WX | MSS | HNSC |
| TCGA-T2-A6WZ | MSS | HNSC |
| TCGA-T2-A6X0 | MSS | HNSC |
| TCGA-T2-A6X2 | MSS | HNSC |
| TCGA-T3-A92M | MSS | HNSC |
| TCGA-T3-A92N | MSS | HNSC |
| TCGA-T7-A92I | MSS | KIRC |
| TCGA-T9-A92H | MSS | COAD |
| TCGA-TK-A8OK | MSS | PRAD |
| TCGA-TM-A7C3 | MSS | LGG  |
| TCGA-TM-A7C4 | MSS | LGG  |
| TCGA-TM-A7C5 | MSS | LGG  |
| TCGA-TM-A7CA | MSS | LGG  |
| TCGA-TM-A7CF | MSS | LGG  |
| TCGA-TM-A7CF | MSS | LGG  |
| TCGA-TM-A84B | MSS | LGG  |
| TCGA-TM-A84C | MSS | LGG  |
| TCGA-TM-A84F | MSS | LGG  |
| TCGA-TM-A84G | MSS | LGG  |
| TCGA-TM-A84H | MSS | LGG  |
| TCGA-TM-A84I | MSS | LGG  |
| TCGA-TM-A84J | MSS | LGG  |
| TCGA-TM-A84L | MSS | LGG  |
| TCGA-TM-A84M | MSS | LGG  |
| TCGA-TM-A84O | MSS | LGG  |
| TCGA-TM-A84Q | MSS | LGG  |
| TCGA-TM-A84R | MSS | LGG  |
| TCGA-TM-A84S | MSS | LGG  |
| TCGA-TM-A84T | MSS | LGG  |
| TCGA-TN-A7HI | MSS | HNSC |
| TCGA-TN-A7HJ | MSS | HNSC |
| TCGA-TN-A7HL | MSS | HNSC |
| TCGA-TP-A8TT | MSS | PRAD |
| TCGA-TP-A8TV | MSS | PRAD |
| TCGA-TQ-A7RF | MSS | LGG  |
| TCGA-TQ-A7RG | MSS | LGG  |
| TCGA-TQ-A7RH | MSS | LGG  |
| TCGA-TQ-A7RI | MSS | LGG  |
| TCGA-TQ-A7RJ | MSS | LGG  |
| TCGA-TQ-A7RK | MSS | LGG  |
| TCGA-TQ-A7RK | MSS | LGG  |
| TCGA-TQ-A7RM | MSS | LGG  |
| TCGA-TQ-A7RN | MSS | LGG  |
| TCGA-TQ-A7RO | MSS | LGG  |
| TCGA-TQ-A7RP | MSS | LGG  |

|              |     |      |
|--------------|-----|------|
| TCGA-TQ-A7RQ | MSS | LGG  |
| TCGA-TQ-A7RR | MSS | LGG  |
| TCGA-TQ-A7RS | MSS | LGG  |
| TCGA-TQ-A7RU | MSS | LGG  |
| TCGA-TQ-A7RV | MSS | LGG  |
| TCGA-TQ-A7RV | MSS | LGG  |
| TCGA-TQ-A7RW | MSS | LGG  |
| TCGA-TQ-A8XE | MSS | LGG  |
| TCGA-TQ-A8XE | MSS | LGG  |
| TCGA-TS-A7OY | MSS | MESO |
| TCGA-TS-A7P0 | MSS | MESO |
| TCGA-TS-A7P3 | MSS | MESO |
| TCGA-TS-A7P6 | MSS | MESO |
| TCGA-TS-A7P8 | MSS | MESO |
| TCGA-TS-A7PB | MSS | MESO |
| TCGA-TS-A8AI | MSS | MESO |
| TCGA-TS-A8AS | MSS | MESO |
| TCGA-TS-A8AV | MSS | MESO |
| TCGA-TS-A8AY | MSS | MESO |
| TCGA-TT-A6YJ | MSS | PCPG |
| TCGA-TT-A6YK | MSS | PCPG |
| TCGA-TT-A6YN | MSS | PCPG |
| TCGA-TT-A6YO | MSS | PCPG |
| TCGA-TT-A6YP | MSS | PCPG |
| TCGA-UB-A7MA | MSS | LIHC |
| TCGA-UB-A7MB | MSS | LIHC |
| TCGA-UB-A7MC | MSS | LIHC |
| TCGA-UB-A7MD | MSS | LIHC |
| TCGA-UB-A7ME | MSS | LIHC |
| TCGA-UB-A7MF | MSS | LIHC |
| TCGA-UB-AA0U | MSS | LIHC |
| TCGA-UB-AA0V | MSS | LIHC |
| TCGA-UC-A7PD | MSS | CESC |
| TCGA-UC-A7PF | MSS | CESC |
| TCGA-UC-A7PG | MSS | CESC |
| TCGA-UC-A7PG | MSS | CESC |
| TCGA-UC-A7PI | MSS | CESC |
| TCGA-UD-AAC5 | MSS | MESO |
| TCGA-UD-AAC7 | MSS | MESO |
| TCGA-UE-A6QT | MSS | SARC |
| TCGA-UE-A6QU | MSS | SARC |
| TCGA-UF-A718 | MSS | HNSC |
| TCGA-UF-A719 | MSS | HNSC |
| TCGA-UF-A71A | MSS | HNSC |
| TCGA-UF-A71A | MSS | HNSC |
| TCGA-UF-A71B | MSS | HNSC |
| TCGA-UF-A71D | MSS | HNSC |
| TCGA-UF-A71E | MSS | HNSC |
| TCGA-UF-A7J9 | MSS | HNSC |
| TCGA-UF-A7JA | MSS | HNSC |
| TCGA-UF-A7JC | MSS | HNSC |
| TCGA-UF-A7JD | MSS | HNSC |

|              |     |      |
|--------------|-----|------|
| TCGA-UF-A7JF | MSS | HNSC |
| TCGA-UF-A7JH | MSS | HNSC |
| TCGA-UF-A7JJ | MSS | HNSC |
| TCGA-UF-A7JK | MSS | HNSC |
| TCGA-UF-A7JO | MSS | HNSC |
| TCGA-UF-A7JS | MSS | HNSC |
| TCGA-UF-A7JT | MSS | HNSC |
| TCGA-UF-A7JV | MSS | HNSC |
| TCGA-UL-AAZ6 | MSS | BRCA |
| TCGA-UN-AAZ9 | MSS | KIRP |
| TCGA-UP-A6WW | MSS | HNSC |
| TCGA-US-A774 | MSS | PAAD |
| TCGA-US-A776 | MSS | PAAD |
| TCGA-US-A779 | MSS | PAAD |
| TCGA-US-A77E | MSS | PAAD |
| TCGA-US-A77G | MSS | PAAD |
| TCGA-US-A77J | MSS | PAAD |
| TCGA-UT-A88C | MSS | MESO |
| TCGA-UT-A88D | MSS | MESO |
| TCGA-UT-A88E | MSS | MESO |
| TCGA-UT-A88G | MSS | MESO |
| TCGA-UT-A97Y | MSS | MESO |
| TCGA-UU-A93S | MSS | BRCA |
| TCGA-UY-A78K | MSS | BLCA |
| TCGA-UY-A78L | MSS | BLCA |
| TCGA-UY-A78M | MSS | BLCA |
| TCGA-UY-A78N | MSS | BLCA |
| TCGA-UY-A78O | MSS | BLCA |
| TCGA-UY-A78P | MSS | BLCA |
| TCGA-UY-A8OB | MSS | BLCA |
| TCGA-UY-A8OC | MSS | BLCA |
| TCGA-UY-A8OD | MSS | BLCA |
| TCGA-UY-A9PA | MSS | BLCA |
| TCGA-UY-A9PB | MSS | BLCA |
| TCGA-UY-A9PD | MSS | BLCA |
| TCGA-UY-A9PE | MSS | BLCA |
| TCGA-UY-A9PF | MSS | BLCA |
| TCGA-UY-A9PH | MSS | BLCA |
| TCGA-UZ-A9PJ | MSS | KIRP |
| TCGA-UZ-A9PK | MSS | KIRP |
| TCGA-UZ-A9PL | MSS | KIRP |
| TCGA-UZ-A9PM | MSS | KIRP |
| TCGA-UZ-A9PN | MSS | KIRP |
| TCGA-UZ-A9PO | MSS | KIRP |
| TCGA-UZ-A9PP | MSS | KIRP |
| TCGA-UZ-A9PQ | MSS | KIRP |
| TCGA-UZ-A9PR | MSS | KIRP |
| TCGA-UZ-A9PS | MSS | KIRP |
| TCGA-UZ-A9PS | MSS | KIRP |
| TCGA-UZ-A9PU | MSS | KIRP |
| TCGA-UZ-A9PV | MSS | KIRP |
| TCGA-UZ-A9PX | MSS | KIRP |



|              |     |      |
|--------------|-----|------|
| TCGA-UZ-A9PZ | MSS | KIRP |
| TCGA-UZ-A9Q0 | MSS | KIRP |
| TCGA-UZ-A9Q1 | MSS | KIRP |
| TCGA-V1-A8MF | MSS | PRAD |
| TCGA-V1-A8MG | MSS | PRAD |
| TCGA-V1-A8MJ | MSS | PRAD |
| TCGA-V1-A8MK | MSS | PRAD |
| TCGA-V1-A8ML | MSS | PRAD |
| TCGA-V1-A8MM | MSS | PRAD |
| TCGA-V1-A8MU | MSS | PRAD |
| TCGA-V1-A8WL | MSS | PRAD |
| TCGA-V1-A8WN | MSS | PRAD |
| TCGA-V1-A8WS | MSS | PRAD |
| TCGA-V1-A8WV | MSS | PRAD |
| TCGA-V1-A8WW | MSS | PRAD |
| TCGA-V1-A8X3 | MSS | PRAD |
| TCGA-V1-A9O5 | MSS | PRAD |
| TCGA-V1-A9O5 | MSS | PRAD |
| TCGA-V1-A9O7 | MSS | PRAD |
| TCGA-V1-A9O9 | MSS | PRAD |
| TCGA-V1-A9OA | MSS | PRAD |
| TCGA-V1-A9OF | MSS | PRAD |
| TCGA-V1-A9OH | MSS | PRAD |
| TCGA-V1-A9OL | MSS | PRAD |
| TCGA-V1-A9OQ | MSS | PRAD |
| TCGA-V1-A9OT | MSS | PRAD |
| TCGA-V1-A9OX | MSS | PRAD |
| TCGA-V1-A9OY | MSS | PRAD |
| TCGA-V1-A9Z7 | MSS | PRAD |
| TCGA-V1-A9Z8 | MSS | PRAD |
| TCGA-V1-A9Z9 | MSS | PRAD |
| TCGA-V1-A9ZG | MSS | PRAD |
| TCGA-V1-A9ZI | MSS | PRAD |
| TCGA-V1-A9ZK | MSS | PRAD |
| TCGA-V1-A9ZR | MSS | PRAD |
| TCGA-V3-A9ZX | MSS | UVM  |
| TCGA-V3-A9ZY | MSS | UVM  |
| TCGA-V4-A9E5 | MSS | UVM  |
| TCGA-V4-A9E7 | MSS | UVM  |
| TCGA-V4-A9E8 | MSS | UVM  |
| TCGA-V4-A9E9 | MSS | UVM  |
| TCGA-V4-A9EA | MSS | UVM  |
| TCGA-V4-A9EC | MSS | UVM  |
| TCGA-V4-A9ED | MSS | UVM  |
| TCGA-V4-A9EE | MSS | UVM  |
| TCGA-V4-A9EF | MSS | UVM  |
| TCGA-V4-A9EH | MSS | UVM  |
| TCGA-V4-A9EI | MSS | UVM  |
| TCGA-V4-A9EJ | MSS | UVM  |
| TCGA-V4-A9EK | MSS | UVM  |
| TCGA-V4-A9EL | MSS | UVM  |
| TCGA-V4-A9EM | MSS | UVM  |

|              |     |      |
|--------------|-----|------|
| TCGA-V4-A9EO | MSS | UVM  |
| TCGA-V4-A9EQ | MSS | UVM  |
| TCGA-V4-A9ES | MSS | UVM  |
| TCGA-V4-A9ET | MSS | UVM  |
| TCGA-V4-A9EU | MSS | UVM  |
| TCGA-V4-A9EV | MSS | UVM  |
| TCGA-V4-A9EW | MSS | UVM  |
| TCGA-V4-A9EX | MSS | UVM  |
| TCGA-V4-A9EY | MSS | UVM  |
| TCGA-V4-A9EZ | MSS | UVM  |
| TCGA-V4-A9F0 | MSS | UVM  |
| TCGA-V4-A9F1 | MSS | UVM  |
| TCGA-V4-A9F2 | MSS | UVM  |
| TCGA-V4-A9F3 | MSS | UVM  |
| TCGA-V4-A9F4 | MSS | UVM  |
| TCGA-V4-A9F5 | MSS | UVM  |
| TCGA-V4-A9F7 | MSS | UVM  |
| TCGA-V4-A9F8 | MSS | UVM  |
| TCGA-V5-A7RB | MSS | ESCA |
| TCGA-V5-A7RC | MSS | ESCA |
| TCGA-V5-A7RC | MSS | ESCA |
| TCGA-V5-A7RE | MSS | ESCA |
| TCGA-V5-AASV | MSS | ESCA |
| TCGA-V5-AASW | MSS | ESCA |
| TCGA-V5-AASX | MSS | ESCA |
| TCGA-V7-A7HQ | MSS | BRCA |
| TCGA-V9-A7HT | MSS | KIRP |
| TCGA-VB-A8QN | MSS | DLBC |
| TCGA-VD-A8K7 | MSS | UVM  |
| TCGA-VD-A8K8 | MSS | UVM  |
| TCGA-VD-A8K9 | MSS | UVM  |
| TCGA-VD-A8KA | MSS | UVM  |
| TCGA-VD-A8KB | MSS | UVM  |
| TCGA-VD-A8KD | MSS | UVM  |
| TCGA-VD-A8KE | MSS | UVM  |
| TCGA-VD-A8KF | MSS | UVM  |
| TCGA-VD-A8KG | MSS | UVM  |
| TCGA-VD-A8KH | MSS | UVM  |
| TCGA-VD-A8KI | MSS | UVM  |
| TCGA-VD-A8KJ | MSS | UVM  |
| TCGA-VD-A8KK | MSS | UVM  |
| TCGA-VD-A8KL | MSS | UVM  |
| TCGA-VD-A8KM | MSS | UVM  |
| TCGA-VD-A8KN | MSS | UVM  |
| TCGA-VD-A8KO | MSS | UVM  |
| TCGA-VD-AA8M | MSS | UVM  |
| TCGA-VD-AA8N | MSS | UVM  |
| TCGA-VD-AA8O | MSS | UVM  |
| TCGA-VD-AA8P | MSS | UVM  |
| TCGA-VD-AA8Q | MSS | UVM  |
| TCGA-VD-AA8R | MSS | UVM  |
| TCGA-VD-AA8S | MSS | UVM  |

|              |       |      |
|--------------|-------|------|
| TCGA-VD-AA8T | MSS   | UVM  |
| TCGA-VF-A8A8 | MSS   | TGCT |
| TCGA-VF-A8A9 | MSS   | TGCT |
| TCGA-VF-A8AA | MSS   | TGCT |
| TCGA-VF-A8AB | MSS   | TGCT |
| TCGA-VF-A8AC | MSS   | TGCT |
| TCGA-VF-A8AD | MSS   | TGCT |
| TCGA-VF-A8AE | MSS   | TGCT |
| TCGA-VG-A8LO | MSS   | OV   |
| TCGA-VM-A8C8 | MSS   | LGG  |
| TCGA-VM-A8C9 | MSS   | LGG  |
| TCGA-VM-A8CA | MSS   | LGG  |
| TCGA-VM-A8CB | MSS   | LGG  |
| TCGA-VM-A8CD | MSS   | LGG  |
| TCGA-VM-A8CE | MSS   | LGG  |
| TCGA-VM-A8CF | MSS   | LGG  |
| TCGA-VM-A8CH | MSS   | LGG  |
| TCGA-VN-A88I | MSS   | PRAD |
| TCGA-VN-A88K | MSS   | PRAD |
| TCGA-VN-A88L | MSS   | PRAD |
| TCGA-VN-A88M | MSS   | PRAD |
| TCGA-VN-A88N | MSS   | PRAD |
| TCGA-VN-A88O | MSS   | PRAD |
| TCGA-VN-A88P | MSS   | PRAD |
| TCGA-VN-A88Q | MSS   | PRAD |
| TCGA-VN-A88R | MSS   | PRAD |
| TCGA-VN-A943 | MSS   | PRAD |
| TCGA-VP-A872 | MSS   | PRAD |
| TCGA-VP-A875 | MSS   | PRAD |
| TCGA-VP-A876 | MSS   | PRAD |
| TCGA-VP-A878 | MSS   | PRAD |
| TCGA-VP-A879 | MSS   | PRAD |
| TCGA-VP-A87B | MSS   | PRAD |
| TCGA-VP-A87C | MSS   | PRAD |
| TCGA-VP-A87D | MSS   | PRAD |
| TCGA-VP-A87E | MSS   | PRAD |
| TCGA-VP-A87H | MSS   | PRAD |
| TCGA-VP-A87J | MSS   | PRAD |
| TCGA-VP-A87K | MSS   | PRAD |
| TCGA-VP-AA1N | MSS   | PRAD |
| TCGA-VQ-A8DL | MSS   | STAD |
| TCGA-VQ-A8DT | MSS   | STAD |
| TCGA-VQ-A8DU | MSS   | STAD |
| TCGA-VQ-A8DV | MSS   | STAD |
| TCGA-VQ-A8DZ | MSS   | STAD |
| TCGA-VQ-A8E0 | MSS   | STAD |
| TCGA-VQ-A8E2 | MSS   | STAD |
| TCGA-VQ-A8E3 | MSI-H | STAD |
| TCGA-VQ-A8E7 | MSS   | STAD |
| TCGA-VQ-A8P2 | MSI-H | STAD |
| TCGA-VQ-A8P3 | MSS   | STAD |
| TCGA-VQ-A8P5 | MSS   | STAD |

|              |       |      |
|--------------|-------|------|
| TCGA-VQ-A8P8 | MSS   | STAD |
| TCGA-VQ-A8PB | MSI-H | STAD |
| TCGA-VQ-A8PC | MSS   | STAD |
| TCGA-VQ-A8PD | MSS   | STAD |
| TCGA-VQ-A8PE | MSS   | STAD |
| TCGA-VQ-A8PF | MSS   | STAD |
| TCGA-VQ-A8PH | MSS   | STAD |
| TCGA-VQ-A8PJ | MSS   | STAD |
| TCGA-VQ-A8PK | MSS   | STAD |
| TCGA-VQ-A8PM | MSS   | STAD |
| TCGA-VQ-A8PO | MSI-H | STAD |
| TCGA-VQ-A8PP | MSI-H | STAD |
| TCGA-VQ-A8PQ | MSS   | STAD |
| TCGA-VQ-A8PS | MSS   | STAD |
| TCGA-VQ-A8PT | MSI-H | STAD |
| TCGA-VQ-A8PU | MSS   | STAD |
| TCGA-VQ-A8PX | MSI-H | STAD |
| TCGA-VQ-A8PY | MSS   | STAD |
| TCGA-VQ-A8PZ | MSS   | STAD |
| TCGA-VQ-A91A | MSS   | STAD |
| TCGA-VQ-A91D | MSI-H | STAD |
| TCGA-VQ-A91E | MSI-H | STAD |
| TCGA-VQ-A91K | MSI-H | STAD |
| TCGA-VQ-A91N | MSS   | STAD |
| TCGA-VQ-A91Q | MSS   | STAD |
| TCGA-VQ-A91S | MSS   | STAD |
| TCGA-VQ-A91U | MSS   | STAD |
| TCGA-VQ-A91V | MSS   | STAD |
| TCGA-VQ-A91W | MSS   | STAD |
| TCGA-VQ-A91X | MSS   | STAD |
| TCGA-VQ-A91Y | MSS   | STAD |
| TCGA-VQ-A91Z | MSS   | STAD |
| TCGA-VQ-A922 | MSS   | STAD |
| TCGA-VQ-A923 | MSS   | STAD |
| TCGA-VQ-A924 | MSI-H | STAD |
| TCGA-VQ-A925 | MSS   | STAD |
| TCGA-VQ-A927 | MSS   | STAD |
| TCGA-VQ-A928 | MSS   | STAD |
| TCGA-VQ-A92D | MSS   | STAD |
| TCGA-VQ-A94O | MSS   | STAD |
| TCGA-VQ-A94P | MSS   | STAD |
| TCGA-VQ-A94R | MSS   | STAD |
| TCGA-VQ-A94T | MSS   | STAD |
| TCGA-VQ-A94U | MSS   | STAD |
| TCGA-VQ-AA64 | MSS   | STAD |
| TCGA-VQ-AA68 | MSS   | STAD |
| TCGA-VQ-AA69 | MSS   | STAD |
| TCGA-VQ-AA6A | MSS   | STAD |
| TCGA-VQ-AA6B | MSS   | STAD |
| TCGA-VQ-AA6D | MSI-H | STAD |
| TCGA-VQ-AA6F | MSS   | STAD |
| TCGA-VQ-AA6G | MSS   | STAD |

|              |       |      |
|--------------|-------|------|
| TCGA-VQ-AA6I | MSS   | STAD |
| TCGA-VQ-AA6J | MSS   | STAD |
| TCGA-VQ-AA6K | MSS   | STAD |
| TCGA-VR-A8EO | MSS   | ESCA |
| TCGA-VR-A8EP | MSS   | ESCA |
| TCGA-VR-A8EQ | MSS   | ESCA |
| TCGA-VR-A8ER | MSS   | ESCA |
| TCGA-VR-A8ET | MSS   | ESCA |
| TCGA-VR-A8EU | MSS   | ESCA |
| TCGA-VR-A8EW | MSS   | ESCA |
| TCGA-VR-A8EX | MSS   | ESCA |
| TCGA-VR-A8EY | MSS   | ESCA |
| TCGA-VR-A8EZ | MSS   | ESCA |
| TCGA-VR-A8Q7 | MSS   | ESCA |
| TCGA-VR-AA4D | MSS   | ESCA |
| TCGA-VR-AA4G | MSS   | ESCA |
| TCGA-VR-AA7B | MSS   | ESCA |
| TCGA-VR-AA7D | MSS   | ESCA |
| TCGA-VR-AA7I | MSS   | ESCA |
| TCGA-VS-A8EB | MSS   | CESC |
| TCGA-VS-A8EC | MSS   | CESC |
| TCGA-VS-A8EG | MSS   | CESC |
| TCGA-VS-A8EH | MSS   | CESC |
| TCGA-VS-A8EI | MSS   | CESC |
| TCGA-VS-A8EJ | MSS   | CESC |
| TCGA-VS-A8EK | MSS   | CESC |
| TCGA-VS-A8EL | MSS   | CESC |
| TCGA-VS-A8Q8 | MSS   | CESC |
| TCGA-VS-A8Q9 | MSS   | CESC |
| TCGA-VS-A8QA | MSS   | CESC |
| TCGA-VS-A8QC | MSS   | CESC |
| TCGA-VS-A8QF | MSS   | CESC |
| TCGA-VS-A8QH | MSS   | CESC |
| TCGA-VS-A8QM | MSS   | CESC |
| TCGA-VS-A94W | MSS   | CESC |
| TCGA-VS-A94X | MSS   | CESC |
| TCGA-VS-A94Y | MSS   | CESC |
| TCGA-VS-A94Z | MSI-H | CESC |
| TCGA-VS-A950 | MSS   | CESC |
| TCGA-VS-A952 | MSS   | CESC |
| TCGA-VS-A953 | MSS   | CESC |
| TCGA-VS-A954 | MSS   | CESC |
| TCGA-VS-A957 | MSS   | CESC |
| TCGA-VS-A958 | MSS   | CESC |
| TCGA-VS-A959 | MSS   | CESC |
| TCGA-VS-A9U5 | MSS   | CESC |
| TCGA-VS-A9U6 | MSI-H | CESC |
| TCGA-VS-A9U7 | MSS   | CESC |
| TCGA-VS-A9UA | MSS   | CESC |
| TCGA-VS-A9UB | MSS   | CESC |
| TCGA-VS-A9UC | MSS   | CESC |
| TCGA-VS-A9UD | MSS   | CESC |

|              |              |      |
|--------------|--------------|------|
| TCGA-VS-A9UH | MSS          | CESC |
| TCGA-VS-A9UI | MSS          | CESC |
| TCGA-VS-A9UJ | MSI-H        | CESC |
| TCGA-VS-A9UL | MSS          | CESC |
| TCGA-VS-A9UM | MSS          | CESC |
| TCGA-VS-A9UO | MSS          | CESC |
| TCGA-VS-A9UP | MSS          | CESC |
| TCGA-VS-A9UQ | MSS          | CESC |
| TCGA-VS-A9UR | MSS          | CESC |
| TCGA-VS-A9UT | MSS          | CESC |
| TCGA-VS-A9UU | MSS          | CESC |
| TCGA-VS-A9UV | MSS          | CESC |
| TCGA-VS-A9UY | MSS          | CESC |
| TCGA-VS-A9UZ | MSS          | CESC |
| TCGA-VS-A9V0 | MSS          | CESC |
| TCGA-VS-A9V1 | MSS          | CESC |
| TCGA-VS-A9V2 | MSS          | CESC |
| TCGA-VS-A9V3 | MSS          | CESC |
| TCGA-VS-A9V4 | MSS          | CESC |
| TCGA-VS-A9V5 | MSS          | CESC |
| TCGA-VS-AA62 | MSS          | CESC |
| TCGA-VT-A80G | MSS          | SARC |
| TCGA-VT-A80J | MSS          | SARC |
| TCGA-VT-A80J | MSS          | SARC |
| TCGA-VT-AB3D | MSS          | SARC |
| TCGA-VV-A829 | MSS          | LGG  |
| TCGA-VV-A86M | MSS          | LGG  |
| TCGA-VW-A7QS | MSS          | LGG  |
| TCGA-VW-A8FI | MSS          | LGG  |
| TCGA-W2-A7H5 | MSS          | PCPG |
| TCGA-W2-A7H7 | MSS          | PCPG |
| TCGA-W2-A7HA | MSS          | PCPG |
| TCGA-W2-A7HB | MSS          | PCPG |
| TCGA-W2-A7HC | MSS          | PCPG |
| TCGA-W2-A7HD | MSS          | PCPG |
| TCGA-W2-A7HE | MSS          | PCPG |
| TCGA-W2-A7HF | MSS          | PCPG |
| TCGA-W2-A7HH | MSS          | PCPG |
| TCGA-W2-A7UY | MSS          | PCPG |
| TCGA-W3-A824 | Intermediate | SKCM |
| TCGA-W3-A825 | MSS          | SKCM |
| TCGA-W3-A828 | MSS          | SKCM |
| TCGA-W3-AA1O | MSS          | SKCM |
| TCGA-W3-AA1Q | MSS          | SKCM |
| TCGA-W3-AA1R | MSS          | SKCM |
| TCGA-W3-AA1V | MSS          | SKCM |
| TCGA-W3-AA1W | MSS          | SKCM |
| TCGA-W3-AA21 | MSS          | SKCM |
| TCGA-W4-A7U2 | MSS          | TGCT |
| TCGA-W4-A7U3 | MSS          | TGCT |
| TCGA-W4-A7U4 | MSS          | TGCT |
| TCGA-W5-AA2G | MSS          | CHOL |

|              |     |      |
|--------------|-----|------|
| TCGA-W5-AA2H | MSS | CHOL |
| TCGA-W5-AA2I | MSS | CHOL |
| TCGA-W5-AA2J | MSS | CHOL |
| TCGA-W5-AA2M | MSS | CHOL |
| TCGA-W5-AA2O | MSS | CHOL |
| TCGA-W5-AA2Q | MSS | CHOL |
| TCGA-W5-AA2R | MSS | CHOL |
| TCGA-W5-AA2T | MSS | CHOL |
| TCGA-W5-AA2U | MSS | CHOL |
| TCGA-W5-AA2W | MSS | CHOL |
| TCGA-W5-AA2X | MSS | CHOL |
| TCGA-W5-AA2Z | MSS | CHOL |
| TCGA-W5-AA30 | MSS | CHOL |
| TCGA-W5-AA31 | MSS | CHOL |
| TCGA-W5-AA33 | MSS | CHOL |
| TCGA-W5-AA34 | MSS | CHOL |
| TCGA-W5-AA36 | MSS | CHOL |
| TCGA-W5-AA38 | MSS | CHOL |
| TCGA-W5-AA39 | MSS | CHOL |
| TCGA-W6-AA0S | MSS | CHOL |
| TCGA-W6-AA0T | MSS | CHOL |
| TCGA-W7-A93N | MSS | CHOL |
| TCGA-W7-A93O | MSS | CHOL |
| TCGA-W7-A93P | MSS | CHOL |
| TCGA-W8-A86G | MSS | BRCA |
| TCGA-W9-A837 | MSS | LGG  |
| TCGA-WA-A7GZ | MSS | HNSC |
| TCGA-WA-A7H4 | MSS | HNSC |
| TCGA-WB-A80K | MSS | PCPG |
| TCGA-WB-A80L | MSS | PCPG |
| TCGA-WB-A80M | MSS | PCPG |
| TCGA-WB-A80N | MSS | PCPG |
| TCGA-WB-A80O | MSS | PCPG |
| TCGA-WB-A80P | MSS | PCPG |
| TCGA-WB-A80Q | MSS | PCPG |
| TCGA-WB-A80V | MSS | PCPG |
| TCGA-WB-A80Y | MSS | PCPG |
| TCGA-WB-A814 | MSS | PCPG |
| TCGA-WB-A815 | MSS | PCPG |
| TCGA-WB-A816 | MSS | PCPG |
| TCGA-WB-A817 | MSS | PCPG |
| TCGA-WB-A818 | MSS | PCPG |
| TCGA-WB-A819 | MSS | PCPG |
| TCGA-WB-A81A | MSS | PCPG |
| TCGA-WB-A81D | MSS | PCPG |
| TCGA-WB-A81E | MSS | PCPG |
| TCGA-WB-A81F | MSS | PCPG |
| TCGA-WB-A81G | MSS | PCPG |
| TCGA-WB-A81H | MSS | PCPG |
| TCGA-WB-A81I | MSS | PCPG |
| TCGA-WB-A81J | MSS | PCPG |
| TCGA-WB-A81K | MSS | PCPG |

|              |     |      |
|--------------|-----|------|
| TCGA-WB-A81M | MSS | PCPG |
| TCGA-WB-A81N | MSS | PCPG |
| TCGA-WB-A81P | MSS | PCPG |
| TCGA-WB-A81Q | MSS | PCPG |
| TCGA-WB-A81R | MSS | PCPG |
| TCGA-WB-A81S | MSS | PCPG |
| TCGA-WB-A81T | MSS | PCPG |
| TCGA-WB-A81V | MSS | PCPG |
| TCGA-WB-A81W | MSS | PCPG |
| TCGA-WB-A820 | MSS | PCPG |
| TCGA-WB-A821 | MSS | PCPG |
| TCGA-WB-A822 | MSS | PCPG |
| TCGA-WC-A87T | MSS | UVM  |
| TCGA-WC-A87U | MSS | UVM  |
| TCGA-WC-A87W | MSS | UVM  |
| TCGA-WC-A87Y | MSS | UVM  |
| TCGA-WC-A880 | MSS | UVM  |
| TCGA-WC-A881 | MSS | UVM  |
| TCGA-WC-A882 | MSS | UVM  |
| TCGA-WC-A883 | MSS | UVM  |
| TCGA-WC-A884 | MSS | UVM  |
| TCGA-WC-A885 | MSS | UVM  |
| TCGA-WC-A888 | MSS | UVM  |
| TCGA-WC-A88A | MSS | UVM  |
| TCGA-WC-AA9A | MSS | UVM  |
| TCGA-WC-AA9E | MSS | UVM  |
| TCGA-WD-A7RX | MSS | CHOL |
| TCGA-WE-A8K1 | MSS | SKCM |
| TCGA-WE-A8K4 | MSS | SKCM |
| TCGA-WE-A8K5 | MSS | SKCM |
| TCGA-WE-A8K6 | MSS | SKCM |
| TCGA-WE-A8ZM | MSS | SKCM |
| TCGA-WE-A8ZN | MSS | SKCM |
| TCGA-WE-A8ZO | MSS | SKCM |
| TCGA-WE-A8ZQ | MSS | SKCM |
| TCGA-WE-A8ZR | MSS | SKCM |
| TCGA-WE-A8ZT | MSS | SKCM |
| TCGA-WE-A8ZX | MSS | SKCM |
| TCGA-WE-A8ZY | MSS | SKCM |
| TCGA-WE-AA9Y | MSS | SKCM |
| TCGA-WE-AAA0 | MSS | SKCM |
| TCGA-WE-AAA3 | MSS | SKCM |
| TCGA-WE-AAA4 | MSS | SKCM |
| TCGA-WH-A86K | MSS | LGG  |
| TCGA-WJ-A86L | MSS | LIHC |
| TCGA-WK-A8XQ | MSS | SARC |
| TCGA-WK-A8XS | MSS | SARC |
| TCGA-WK-A8XT | MSS | SARC |
| TCGA-WK-A8XY | MSS | SARC |
| TCGA-WK-A8XZ | MSS | SARC |
| TCGA-WK-A8Y0 | MSS | SARC |
| TCGA-WL-A834 | MSS | CESC |



|              |       |      |
|--------------|-------|------|
| TCGA-WN-A9G9 | MSS   | KIRP |
| TCGA-WN-AB4C | MSS   | KIRP |
| TCGA-WP-A9GB | MSS   | SARC |
| TCGA-WQ-A9G7 | MSI-H | LIHC |
| TCGA-WQ-AB4B | MSS   | LIHC |
| TCGA-WR-A838 | MSS   | OV   |
| TCGA-WS-AB45 | MSI-H | COAD |
| TCGA-WT-AB41 | MSS   | BRCA |
| TCGA-WT-AB44 | MSS   | BRCA |
| TCGA-WW-A8ZI | MSS   | PRAD |
| TCGA-WX-AA44 | MSS   | LIHC |
| TCGA-WX-AA46 | MSS   | LIHC |
| TCGA-WX-AA47 | MSS   | LIHC |
| TCGA-WY-A858 | MSS   | LGG  |
| TCGA-WY-A859 | MSS   | LGG  |
| TCGA-WY-A85A | MSS   | LGG  |
| TCGA-WY-A85B | MSS   | LGG  |
| TCGA-WY-A85C | MSS   | LGG  |
| TCGA-WY-A85D | MSS   | LGG  |
| TCGA-WY-A85E | MSS   | LGG  |
| TCGA-WZ-A7V3 | MSS   | TGCT |
| TCGA-WZ-A7V4 | MSS   | TGCT |
| TCGA-WZ-A7V5 | MSS   | TGCT |
| TCGA-WZ-A8D5 | MSS   | TGCT |
| TCGA-X2-A95T | MSS   | SARC |
| TCGA-X3-A8G4 | MSS   | TGCT |
| TCGA-X4-A8KQ | MSS   | PRAD |
| TCGA-X4-A8KS | MSS   | PRAD |
| TCGA-X6-A7W8 | MSS   | SARC |
| TCGA-X6-A7WA | MSS   | SARC |
| TCGA-X6-A7WB | MSS   | SARC |
| TCGA-X6-A7WC | MSS   | SARC |
| TCGA-X6-A7WD | MSS   | SARC |
| TCGA-X6-A8C2 | MSS   | SARC |
| TCGA-X6-A8C3 | MSS   | SARC |
| TCGA-X6-A8C4 | MSS   | SARC |
| TCGA-X6-A8C5 | MSS   | SARC |
| TCGA-X6-A8C6 | MSS   | SARC |
| TCGA-X6-A8C7 | MSS   | SARC |
| TCGA-X7-A8D6 | MSS   | THYM |
| TCGA-X7-A8D8 | MSS   | THYM |
| TCGA-X7-A8D9 | MSS   | THYM |
| TCGA-X7-A8DB | MSS   | THYM |
| TCGA-X7-A8DC | MSS   | THYM |
| TCGA-X7-A8DD | MSS   | THYM |
| TCGA-X7-A8DE | MSS   | THYM |
| TCGA-X7-A8DF | MSS   | THYM |
| TCGA-X7-A8DG | MSS   | THYM |
| TCGA-X7-A8DI | MSS   | THYM |
| TCGA-X7-A8DJ | MSS   | THYM |
| TCGA-X7-A8M0 | MSS   | THYM |
| TCGA-X7-A8M1 | MSS   | THYM |

|              |     |      |
|--------------|-----|------|
| TCGA-X7-A8M3 | MSS | THYM |
| TCGA-X7-A8M4 | MSS | THYM |
| TCGA-X7-A8M5 | MSS | THYM |
| TCGA-X7-A8M6 | MSS | THYM |
| TCGA-X7-A8M7 | MSS | THYM |
| TCGA-X7-A8M8 | MSS | THYM |
| TCGA-X8-AAAR | MSS | ESCA |
| TCGA-X9-A971 | MSS | SARC |
| TCGA-X9-A973 | MSS | SARC |
| TCGA-XA-A8JR | MSS | PRAD |
| TCGA-XC-AA0X | MSS | LUSC |
| TCGA-XD-AAUG | MSS | PAAD |
| TCGA-XD-AAUH | MSS | PAAD |
| TCGA-XD-AAUI | MSS | PAAD |
| TCGA-XD-AAUL | MSS | PAAD |
| TCGA-XE-A8H1 | MSS | TGCT |
| TCGA-XE-A8H4 | MSS | TGCT |
| TCGA-XE-A8H5 | MSS | TGCT |
| TCGA-XE-A9SE | MSS | TGCT |
| TCGA-XE-AANI | MSS | TGCT |
| TCGA-XE-AANJ | MSS | TGCT |
| TCGA-XE-AANR | MSS | TGCT |
| TCGA-XE-AANV | MSS | TGCT |
| TCGA-XE-AAO3 | MSS | TGCT |
| TCGA-XE-AAO4 | MSS | TGCT |
| TCGA-XE-AAO6 | MSS | TGCT |
| TCGA-XE-AAOB | MSS | TGCT |
| TCGA-XE-AAOC | MSS | TGCT |
| TCGA-XE-AAOD | MSS | TGCT |
| TCGA-XE-AAOF | MSS | TGCT |
| TCGA-XE-AAOJ | MSS | TGCT |
| TCGA-XE-AAOL | MSS | TGCT |
| TCGA-XF-A8HB | MSS | BLCA |
| TCGA-XF-A8HC | MSS | BLCA |
| TCGA-XF-A8HD | MSS | BLCA |
| TCGA-XF-A8HE | MSS | BLCA |
| TCGA-XF-A8HF | MSS | BLCA |
| TCGA-XF-A8HG | MSS | BLCA |
| TCGA-XF-A8HH | MSS | BLCA |
| TCGA-XF-A8HI | MSS | BLCA |
| TCGA-XF-A9SG | MSS | BLCA |
| TCGA-XF-A9SH | MSS | BLCA |
| TCGA-XF-A9SI | MSS | BLCA |
| TCGA-XF-A9SJ | MSS | BLCA |
| TCGA-XF-A9SK | MSS | BLCA |
| TCGA-XF-A9SL | MSS | BLCA |
| TCGA-XF-A9SM | MSS | BLCA |
| TCGA-XF-A9SP | MSS | BLCA |
| TCGA-XF-A9ST | MSS | BLCA |
| TCGA-XF-A9SU | MSS | BLCA |
| TCGA-XF-A9SV | MSS | BLCA |
| TCGA-XF-A9SW | MSS | BLCA |

|              |              |      |
|--------------|--------------|------|
| TCGA-XF-A9SX | MSS          | BLCA |
| TCGA-XF-A9SY | MSS          | BLCA |
| TCGA-XF-A9SZ | MSS          | BLCA |
| TCGA-XF-A9T0 | MSS          | BLCA |
| TCGA-XF-A9T2 | Intermediate | BLCA |
| TCGA-XF-A9T3 | MSS          | BLCA |
| TCGA-XF-A9T4 | MSS          | BLCA |
| TCGA-XF-A9T5 | MSS          | BLCA |
| TCGA-XF-A9T6 | MSS          | BLCA |
| TCGA-XF-A9T8 | MSS          | BLCA |
| TCGA-XF-AAME | MSS          | BLCA |
| TCGA-XF-AAMF | MSS          | BLCA |
| TCGA-XF-AAMG | MSS          | BLCA |
| TCGA-XF-AAMH | MSS          | BLCA |
| TCGA-XF-AAMJ | MSS          | BLCA |
| TCGA-XF-AAML | MSS          | BLCA |
| TCGA-XF-AAMQ | MSS          | BLCA |
| TCGA-XF-AAMR | MSS          | BLCA |
| TCGA-XF-AAMT | MSS          | BLCA |
| TCGA-XF-AAMW | MSS          | BLCA |
| TCGA-XF-AAMX | MSS          | BLCA |
| TCGA-XF-AAMY | MSS          | BLCA |
| TCGA-XF-AAMZ | MSS          | BLCA |
| TCGA-XF-AAN0 | MSS          | BLCA |
| TCGA-XF-AAN1 | MSS          | BLCA |
| TCGA-XF-AAN2 | MSS          | BLCA |
| TCGA-XF-AAN3 | MSS          | BLCA |
| TCGA-XF-AAN4 | MSS          | BLCA |
| TCGA-XF-AAN5 | MSS          | BLCA |
| TCGA-XF-AAN7 | MSS          | BLCA |
| TCGA-XF-AAN8 | MSS          | BLCA |
| TCGA-XG-A823 | MSS          | PCPG |
| TCGA-XH-A853 | MSS          | THYM |
| TCGA-XJ-A83F | MSS          | PRAD |
| TCGA-XJ-A83G | MSS          | PRAD |
| TCGA-XJ-A83H | MSS          | PRAD |
| TCGA-XJ-A9DI | MSS          | PRAD |
| TCGA-XJ-A9DK | MSS          | PRAD |
| TCGA-XJ-A9DQ | MSS          | PRAD |
| TCGA-XJ-A9DX | MSS          | PRAD |
| TCGA-XK-AAIR | MSS          | PRAD |
| TCGA-XK-AAIV | MSS          | PRAD |
| TCGA-XK-AAIW | MSI-H        | PRAD |
| TCGA-XK-AAJ3 | MSS          | PRAD |
| TCGA-XK-AAJA | MSS          | PRAD |
| TCGA-XK-AAJP | MSS          | PRAD |
| TCGA-XK-AAJR | MSS          | PRAD |
| TCGA-XK-AAJT | MSS          | PRAD |
| TCGA-XK-AAJU | MSS          | PRAD |
| TCGA-XK-AAK1 | MSS          | PRAD |
| TCGA-XM-A8R8 | MSS          | THYM |
| TCGA-XM-A8R9 | MSS          | THYM |

|              |     |      |
|--------------|-----|------|
| TCGA-XM-A8RB | MSS | THYM |
| TCGA-XM-A8RC | MSS | THYM |
| TCGA-XM-A8RD | MSS | THYM |
| TCGA-XM-A8RE | MSS | THYM |
| TCGA-XM-A8RF | MSS | THYM |
| TCGA-XM-A8RG | MSS | THYM |
| TCGA-XM-A8RH | MSS | THYM |
| TCGA-XM-A8RI | MSS | THYM |
| TCGA-XM-A8RL | MSS | THYM |
| TCGA-XM-AAZ1 | MSS | THYM |
| TCGA-XM-AAZ2 | MSS | THYM |
| TCGA-XN-A8T3 | MSS | PAAD |
| TCGA-XN-A8T5 | MSS | PAAD |
| TCGA-XP-A8T6 | MSS | ESCA |
| TCGA-XP-A8T7 | MSS | ESCA |
| TCGA-XP-A8T8 | MSS | ESCA |
| TCGA-XQ-A8TA | MSS | PRAD |
| TCGA-XQ-A8TB | MSS | PRAD |
| TCGA-XR-A8TC | MSS | LIHC |
| TCGA-XR-A8TD | MSS | LIHC |
| TCGA-XR-A8TE | MSS | LIHC |
| TCGA-XR-A8TF | MSS | LIHC |
| TCGA-XR-A8TG | MSS | LIHC |
| TCGA-XS-A8TJ | MSS | CESC |
| TCGA-XT-AASU | MSS | MESO |
| TCGA-XU-A92O | MSS | THYM |
| TCGA-XU-A92Q | MSS | THYM |
| TCGA-XU-A92R | MSS | THYM |
| TCGA-XU-A92T | MSS | THYM |
| TCGA-XU-A92U | MSS | THYM |
| TCGA-XU-A92V | MSS | THYM |
| TCGA-XU-A92W | MSS | THYM |
| TCGA-XU-A92X | MSS | THYM |
| TCGA-XU-A92Y | MSS | THYM |
| TCGA-XU-A92Z | MSS | THYM |
| TCGA-XU-A931 | MSS | THYM |
| TCGA-XU-A932 | MSS | THYM |
| TCGA-XU-A933 | MSS | THYM |
| TCGA-XU-A936 | MSS | THYM |
| TCGA-XU-AAXW | MSS | THYM |
| TCGA-XU-AAXX | MSS | THYM |
| TCGA-XU-AAXY | MSS | THYM |
| TCGA-XU-AAXZ | MSS | THYM |
| TCGA-XU-AAZ0 | MSS | THYM |
| TCGA-XV-A9VZ | MSS | SKCM |
| TCGA-XV-A9W2 | MSS | SKCM |
| TCGA-XV-A9W5 | MSS | SKCM |
| TCGA-XV-AAZV | MSS | SKCM |
| TCGA-XV-AAZW | MSS | SKCM |
| TCGA-XV-AAZY | MSS | SKCM |
| TCGA-XV-AB01 | MSS | SKCM |
| TCGA-XX-A899 | MSS | BRCA |

|              |     |      |
|--------------|-----|------|
| TCGA-XX-A89A | MSS | BRCA |
| TCGA-XY-A89B | MSS | TGCT |
| TCGA-XY-A8S2 | MSS | TGCT |
| TCGA-XY-A8S3 | MSS | TGCT |
| TCGA-XY-A9T9 | MSS | TGCT |
| TCGA-Y6-A8TL | MSS | PRAD |
| TCGA-Y6-A9XI | MSS | PRAD |
| TCGA-Y8-A894 | MSS | KIRP |
| TCGA-Y8-A895 | MSS | KIRP |
| TCGA-Y8-A896 | MSS | KIRP |
| TCGA-Y8-A897 | MSS | KIRP |
| TCGA-Y8-A898 | MSS | KIRP |
| TCGA-Y8-A8RY | MSS | KIRP |
| TCGA-Y8-A8RZ | MSS | KIRP |
| TCGA-Y8-A8S0 | MSS | KIRP |
| TCGA-Y8-A8S1 | MSS | KIRP |
| TCGA-YA-A8S7 | MSS | LIHC |
| TCGA-YB-A89D | MSS | PAAD |
| TCGA-YC-A89H | MSS | BLCA |
| TCGA-YC-A8S6 | MSS | BLCA |
| TCGA-YC-A9TC | MSS | BLCA |
| TCGA-YD-A89C | MSS | SKCM |
| TCGA-YD-A9TA | MSS | SKCM |
| TCGA-YD-A9TB | MSS | SKCM |
| TCGA-YF-AA3L | MSS | BLCA |
| TCGA-YF-AA3M | MSS | BLCA |
| TCGA-YG-AA3N | MSS | SKCM |
| TCGA-YG-AA3O | MSS | SKCM |
| TCGA-YG-AA3P | MSS | SKCM |
| TCGA-YH-A8SY | MSS | PAAD |
| TCGA-YJ-A8SW | MSS | PRAD |
| TCGA-YL-A8HJ | MSS | PRAD |
| TCGA-YL-A8HK | MSS | PRAD |
| TCGA-YL-A8HL | MSS | PRAD |
| TCGA-YL-A8HM | MSS | PRAD |
| TCGA-YL-A8HO | MSS | PRAD |
| TCGA-YL-A8S8 | MSS | PRAD |
| TCGA-YL-A8S9 | MSS | PRAD |
| TCGA-YL-A8SA | MSS | PRAD |
| TCGA-YL-A8SB | MSS | PRAD |
| TCGA-YL-A8SC | MSS | PRAD |
| TCGA-YL-A8SF | MSS | PRAD |
| TCGA-YL-A8SH | MSS | PRAD |
| TCGA-YL-A8SI | MSS | PRAD |
| TCGA-YL-A8SJ | MSS | PRAD |
| TCGA-YL-A8SK | MSS | PRAD |
| TCGA-YL-A8SL | MSS | PRAD |
| TCGA-YL-A8SO | MSS | PRAD |
| TCGA-YL-A8SP | MSS | PRAD |
| TCGA-YL-A8SQ | MSS | PRAD |
| TCGA-YL-A8SR | MSS | PRAD |
| TCGA-YL-A9WH | MSS | PRAD |

|              |       |      |
|--------------|-------|------|
| TCGA-YL-A9WI | MSS   | PRAD |
| TCGA-YL-A9WJ | MSS   | PRAD |
| TCGA-YL-A9WK | MSS   | PRAD |
| TCGA-YL-A9WL | MSS   | PRAD |
| TCGA-YL-A9WX | MSS   | PRAD |
| TCGA-YL-A9WY | MSS   | PRAD |
| TCGA-YR-A95A | MSS   | CHOL |
| TCGA-YS-A95B | MSS   | MESO |
| TCGA-YS-A95C | MSS   | MESO |
| TCGA-YT-A95D | MSS   | THYM |
| TCGA-YT-A95E | MSS   | THYM |
| TCGA-YT-A95F | MSS   | THYM |
| TCGA-YT-A95G | MSS   | THYM |
| TCGA-YT-A95H | MSS   | THYM |
| TCGA-YU-A90P | MSS   | TGCT |
| TCGA-YU-A90Q | MSS   | TGCT |
| TCGA-YU-A90S | MSS   | TGCT |
| TCGA-YU-A90W | MSS   | TGCT |
| TCGA-YU-A90Y | MSS   | TGCT |
| TCGA-YU-A912 | MSS   | TGCT |
| TCGA-YU-A94D | MSS   | TGCT |
| TCGA-YU-A94I | MSS   | TGCT |
| TCGA-YU-AA4L | MSS   | TGCT |
| TCGA-YU-AA61 | MSS   | TGCT |
| TCGA-YY-A8LH | MSS   | PAAD |
| TCGA-YZ-A980 | MSS   | UVM  |
| TCGA-YZ-A982 | MSS   | UVM  |
| TCGA-YZ-A983 | MSS   | UVM  |
| TCGA-YZ-A984 | MSS   | UVM  |
| TCGA-YZ-A985 | MSS   | UVM  |
| TCGA-Z2-A8RT | MSS   | SKCM |
| TCGA-Z2-AA3S | MSS   | SKCM |
| TCGA-Z2-AA3V | MSS   | SKCM |
| TCGA-Z4-A8JB | MSS   | SARC |
| TCGA-Z4-A9VC | MSS   | SARC |
| TCGA-Z4-AAPF | MSS   | SARC |
| TCGA-Z4-AAPG | MSS   | SARC |
| TCGA-Z5-AAPL | MSS   | PAAD |
| TCGA-Z6-A8JD | MSS   | ESCA |
| TCGA-Z6-A8JE | MSS   | ESCA |
| TCGA-Z6-A9VB | MSS   | ESCA |
| TCGA-Z6-AAPN | MSS   | ESCA |
| TCGA-Z7-A8R5 | MSS   | BRCA |
| TCGA-Z7-A8R6 | MSS   | BRCA |
| TCGA-ZA-A8F6 | MSS   | STAD |
| TCGA-ZB-A961 | MSS   | THYM |
| TCGA-ZB-A962 | MSS   | THYM |
| TCGA-ZB-A963 | MSS   | THYM |
| TCGA-ZB-A964 | MSS   | THYM |
| TCGA-ZB-A965 | MSS   | THYM |
| TCGA-ZB-A966 | MSI-H | THYM |
| TCGA-ZB-A969 | MSS   | THYM |

|              |              |      |
|--------------|--------------|------|
| TCGA-ZB-A96A | MSS          | THYM |
| TCGA-ZB-A96B | MSS          | THYM |
| TCGA-ZB-A96C | MSS          | THYM |
| TCGA-ZB-A96D | MSS          | THYM |
| TCGA-ZB-A96E | MSS          | THYM |
| TCGA-ZB-A96F | MSS          | THYM |
| TCGA-ZB-A96G | MSS          | THYM |
| TCGA-ZB-A96H | MSS          | THYM |
| TCGA-ZB-A96I | MSS          | THYM |
| TCGA-ZB-A96K | MSS          | THYM |
| TCGA-ZB-A96L | MSS          | THYM |
| TCGA-ZB-A96M | MSS          | THYM |
| TCGA-ZB-A96O | MSS          | THYM |
| TCGA-ZB-A96P | MSS          | THYM |
| TCGA-ZB-A96Q | MSS          | THYM |
| TCGA-ZB-A96R | MSS          | THYM |
| TCGA-ZB-A96V | MSS          | THYM |
| TCGA-ZC-AAA7 | MSS          | THYM |
| TCGA-ZC-AAAA | MSS          | THYM |
| TCGA-ZC-AAAF | MSS          | THYM |
| TCGA-ZC-AAAH | MSS          | THYM |
| TCGA-ZD-A8I3 | MSS          | CHOL |
| TCGA-ZF-A9R0 | MSS          | BLCA |
| TCGA-ZF-A9R1 | MSS          | BLCA |
| TCGA-ZF-A9R2 | MSS          | BLCA |
| TCGA-ZF-A9R3 | MSS          | BLCA |
| TCGA-ZF-A9R4 | MSS          | BLCA |
| TCGA-ZF-A9R5 | MSS          | BLCA |
| TCGA-ZF-A9R7 | MSS          | BLCA |
| TCGA-ZF-A9R9 | MSS          | BLCA |
| TCGA-ZF-A9RC | MSS          | BLCA |
| TCGA-ZF-A9RD | MSS          | BLCA |
| TCGA-ZF-A9RE | MSS          | BLCA |
| TCGA-ZF-A9RF | MSS          | BLCA |
| TCGA-ZF-A9RG | MSS          | BLCA |
| TCGA-ZF-A9RL | MSS          | BLCA |
| TCGA-ZF-A9RM | MSS          | BLCA |
| TCGA-ZF-A9RN | MSS          | BLCA |
| TCGA-ZF-AA4N | MSS          | BLCA |
| TCGA-ZF-AA4R | MSS          | BLCA |
| TCGA-ZF-AA4T | MSS          | BLCA |
| TCGA-ZF-AA4U | MSS          | BLCA |
| TCGA-ZF-AA4V | MSS          | BLCA |
| TCGA-ZF-AA4W | Intermediate | BLCA |
| TCGA-ZF-AA4X | MSS          | BLCA |
| TCGA-ZF-AA51 | MSS          | BLCA |
| TCGA-ZF-AA52 | MSS          | BLCA |
| TCGA-ZF-AA53 | MSS          | BLCA |
| TCGA-ZF-AA54 | MSS          | BLCA |
| TCGA-ZF-AA56 | MSS          | BLCA |
| TCGA-ZF-AA58 | MSS          | BLCA |
| TCGA-ZF-AA5H | MSS          | BLCA |

|              |       |      |
|--------------|-------|------|
| TCGA-ZF-AA5N | MSS   | BLCA |
| TCGA-ZF-AA5P | MSS   | BLCA |
| TCGA-ZG-A8QW | MSS   | PRAD |
| TCGA-ZG-A8QX | MSS   | PRAD |
| TCGA-ZG-A8QY | MSS   | PRAD |
| TCGA-ZG-A8QZ | MSS   | PRAD |
| TCGA-ZG-A9KY | MSS   | PRAD |
| TCGA-ZG-A9L0 | MSS   | PRAD |
| TCGA-ZG-A9L1 | MSS   | PRAD |
| TCGA-ZG-A9L2 | MSS   | PRAD |
| TCGA-ZG-A9L4 | MSS   | PRAD |
| TCGA-ZG-A9L5 | MSS   | PRAD |
| TCGA-ZG-A9L6 | MSS   | PRAD |
| TCGA-ZG-A9L9 | MSS   | PRAD |
| TCGA-ZG-A9LB | MSS   | PRAD |
| TCGA-ZG-A9LM | MSS   | PRAD |
| TCGA-ZG-A9LN | MSS   | PRAD |
| TCGA-ZG-A9LS | MSS   | PRAD |
| TCGA-ZG-A9LU | MSS   | PRAD |
| TCGA-ZG-A9LY | MSS   | PRAD |
| TCGA-ZG-A9LZ | MSS   | PRAD |
| TCGA-ZG-A9M4 | MSS   | PRAD |
| TCGA-ZG-A9MC | MSS   | PRAD |
| TCGA-ZG-A9N3 | MSS   | PRAD |
| TCGA-ZG-A9ND | MSS   | PRAD |
| TCGA-ZG-A9NI | MSS   | PRAD |
| TCGA-ZH-A8Y1 | MSS   | CHOL |
| TCGA-ZH-A8Y2 | MSS   | CHOL |
| TCGA-ZH-A8Y3 | MSS   | CHOL |
| TCGA-ZH-A8Y4 | MSS   | CHOL |
| TCGA-ZH-A8Y5 | MSS   | CHOL |
| TCGA-ZH-A8Y6 | MSS   | CHOL |
| TCGA-ZH-A8Y7 | MSI-H | CHOL |
| TCGA-ZH-A8Y8 | MSS   | CHOL |
| TCGA-ZJ-A8QO | MSS   | CESC |
| TCGA-ZJ-A8QQ | MSS   | CESC |
| TCGA-ZJ-A8QR | MSS   | CESC |
| TCGA-ZJ-AAX4 | MSS   | CESC |
| TCGA-ZJ-AAX8 | MSS   | CESC |
| TCGA-ZJ-AAXA | MSS   | CESC |
| TCGA-ZJ-AAXB | MSS   | CESC |
| TCGA-ZJ-AAXD | MSS   | CESC |
| TCGA-ZJ-AAXF | MSS   | CESC |
| TCGA-ZJ-AAXI | MSS   | CESC |
| TCGA-ZJ-AAXJ | MSS   | CESC |
| TCGA-ZJ-AAXN | MSS   | CESC |
| TCGA-ZJ-AAXT | MSS   | CESC |
| TCGA-ZJ-AAXU | MSS   | CESC |
| TCGA-ZJ-AB0H | MSS   | CESC |
| TCGA-ZJ-AB0I | MSS   | CESC |
| TCGA-ZK-AAYZ | MSS   | CHOL |
| TCGA-ZL-A9V6 | MSS   | THYM |



|              |              |      |
|--------------|--------------|------|
| TCGA-ZM-AA05 | MSS          | TGCT |
| TCGA-ZM-AA06 | MSS          | TGCT |
| TCGA-ZM-AA0B | MSS          | TGCT |
| TCGA-ZM-AA0D | MSS          | TGCT |
| TCGA-ZM-AA0E | MSS          | TGCT |
| TCGA-ZM-AA0F | MSS          | TGCT |
| TCGA-ZM-AA0H | MSS          | TGCT |
| TCGA-ZM-AA0N | MSS          | TGCT |
| TCGA-ZN-A9VQ | Intermediate | MESO |
| TCGA-ZN-A9VS | MSS          | MESO |
| TCGA-ZN-A9VU | MSS          | MESO |
| TCGA-ZP-A9CV | MSS          | LIHC |
| TCGA-ZP-A9CY | MSS          | LIHC |
| TCGA-ZP-A9CZ | MSS          | LIHC |
| TCGA-ZP-A9D0 | MSS          | LIHC |
| TCGA-ZP-A9D1 | MSS          | LIHC |
| TCGA-ZP-A9D2 | MSS          | LIHC |
| TCGA-ZP-A9D4 | MSS          | LIHC |
| TCGA-ZQ-A9CR | MSS          | STAD |
| TCGA-ZR-A9CJ | MSS          | ESCA |
| TCGA-ZS-A9CD | MSS          | LIHC |
| TCGA-ZS-A9CE | MSS          | LIHC |
| TCGA-ZS-A9CF | MSS          | LIHC |
| TCGA-ZS-A9CF | MSS          | LIHC |
| TCGA-ZS-A9CG | MSS          | LIHC |
| TCGA-ZT-A8OM | MSS          | THYM |
| TCGA-ZU-A8S4 | MSS          | CHOL |
| TCGA-ZX-AA5X | MSS          | CESC |

**Supplemental Table 2. Inferred MSI diagnosis for tumors from whole genome sequencing**

| <b>TCGA ID</b> | <b>MSI diagnosis</b> | <b>Cancer type</b> |
|----------------|----------------------|--------------------|
| TCGA-02-2483   | MSS                  | GBM                |
| TCGA-02-2485   | MSS                  | GBM                |
| TCGA-04-1331   | MSS                  | OV                 |
| TCGA-04-1347   | MSS                  | OV                 |
| TCGA-04-1349   | MSS                  | OV                 |
| TCGA-04-1367   | MSS                  | OV                 |
| TCGA-04-1371   | MSS                  | OV                 |
| TCGA-04-1514   | MSS                  | OV                 |
| TCGA-04-1542   | MSS                  | OV                 |
| TCGA-05-4389   | MSS                  | LUAD               |
| TCGA-05-4395   | MSS                  | LUAD               |
| TCGA-05-4396   | MSS                  | LUAD               |
| TCGA-05-4397   | MSS                  | LUAD               |
| TCGA-05-5429   | MSS                  | LUAD               |
| TCGA-06-0124   | MSS                  | GBM                |
| TCGA-06-0125   | MSS                  | GBM                |
| TCGA-06-0125   | MSS                  | GBM                |
| TCGA-06-0128   | MSS                  | GBM                |
| TCGA-06-0145   | MSS                  | GBM                |
| TCGA-06-0152   | MSS                  | GBM                |
| TCGA-06-0152   | MSS                  | GBM                |
| TCGA-06-0155   | MSS                  | GBM                |
| TCGA-06-0157   | MSS                  | GBM                |
| TCGA-06-0171   | MSS                  | GBM                |
| TCGA-06-0171   | MSS                  | GBM                |
| TCGA-06-0185   | MSS                  | GBM                |
| TCGA-06-0188   | MSS                  | GBM                |
| TCGA-06-0190   | MSS                  | GBM                |
| TCGA-06-0190   | MSS                  | GBM                |
| TCGA-06-0210   | MSS                  | GBM                |
| TCGA-06-0210   | MSS                  | GBM                |
| TCGA-06-0211   | MSS                  | GBM                |
| TCGA-06-0211   | MSS                  | GBM                |
| TCGA-06-0214   | MSS                  | GBM                |
| TCGA-06-0221   | MSS                  | GBM                |
| TCGA-06-0221   | MSS                  | GBM                |
| TCGA-06-0648   | MSS                  | GBM                |
| TCGA-06-0686   | MSS                  | GBM                |
| TCGA-06-0744   | MSS                  | GBM                |
| TCGA-06-0745   | MSS                  | GBM                |
| TCGA-06-0877   | MSS                  | GBM                |
| TCGA-06-0881   | MSS                  | GBM                |
| TCGA-06-1086   | MSS                  | GBM                |
| TCGA-06-2557   | MSS                  | GBM                |
| TCGA-06-2570   | MSS                  | GBM                |
| TCGA-06-5411   | MSS                  | GBM                |
| TCGA-06-5415   | MSS                  | GBM                |
| TCGA-09-1666   | MSS                  | OV                 |
| TCGA-09-2045   | MSS                  | OV                 |
| TCGA-09-2050   | MSS                  | OV                 |

|              |     |      |
|--------------|-----|------|
| TCGA-10-0934 | MSS | OV   |
| TCGA-10-0937 | MSS | OV   |
| TCGA-10-0938 | MSS | OV   |
| TCGA-13-0723 | MSS | OV   |
| TCGA-13-0725 | MSS | OV   |
| TCGA-13-0727 | MSS | OV   |
| TCGA-13-0751 | MSS | OV   |
| TCGA-13-0890 | MSS | OV   |
| TCGA-13-0906 | MSS | OV   |
| TCGA-13-0912 | MSS | OV   |
| TCGA-13-1411 | MSS | OV   |
| TCGA-13-1477 | MSS | OV   |
| TCGA-13-1487 | MSS | OV   |
| TCGA-13-1491 | MSS | OV   |
| TCGA-14-0786 | MSS | GBM  |
| TCGA-14-1034 | MSS | GBM  |
| TCGA-14-1034 | MSS | GBM  |
| TCGA-14-1401 | MSS | GBM  |
| TCGA-14-1402 | MSS | GBM  |
| TCGA-14-1402 | MSS | GBM  |
| TCGA-14-1454 | MSS | GBM  |
| TCGA-14-1459 | MSS | GBM  |
| TCGA-14-1823 | MSS | GBM  |
| TCGA-14-2554 | MSS | GBM  |
| TCGA-15-1444 | MSS | GBM  |
| TCGA-16-1063 | MSS | GBM  |
| TCGA-16-1460 | MSS | GBM  |
| TCGA-18-3408 | MSS | LUSC |
| TCGA-18-4721 | MSS | LUSC |
| TCGA-19-1389 | MSS | GBM  |
| TCGA-19-1389 | MSS | GBM  |
| TCGA-19-2620 | MSS | GBM  |
| TCGA-19-2624 | MSS | GBM  |
| TCGA-19-2629 | MSS | GBM  |
| TCGA-19-5960 | MSS | GBM  |
| TCGA-21-1076 | MSS | LUSC |
| TCGA-21-1078 | MSS | LUSC |
| TCGA-21-1082 | MSS | LUSC |
| TCGA-21-1083 | MSS | LUSC |
| TCGA-22-1016 | MSS | LUSC |
| TCGA-22-5477 | MSS | LUSC |
| TCGA-22-5485 | MSS | LUSC |
| TCGA-22-5492 | MSS | LUSC |
| TCGA-23-1110 | MSS | OV   |
| TCGA-23-1118 | MSS | OV   |
| TCGA-23-1124 | MSS | OV   |
| TCGA-24-0980 | MSS | OV   |
| TCGA-24-0982 | MSS | OV   |
| TCGA-24-1103 | MSS | OV   |
| TCGA-24-1419 | MSS | OV   |
| TCGA-24-1466 | MSS | OV   |
| TCGA-24-1544 | MSS | OV   |

|              |     |      |
|--------------|-----|------|
| TCGA-24-1548 | MSS | OV   |
| TCGA-24-1552 | MSS | OV   |
| TCGA-24-1557 | MSS | OV   |
| TCGA-24-1558 | MSS | OV   |
| TCGA-24-1562 | MSS | OV   |
| TCGA-24-1614 | MSS | OV   |
| TCGA-24-2024 | MSS | OV   |
| TCGA-24-2290 | MSS | OV   |
| TCGA-25-1319 | MSS | OV   |
| TCGA-25-1632 | MSS | OV   |
| TCGA-25-1634 | MSS | OV   |
| TCGA-25-2391 | MSS | OV   |
| TCGA-25-2400 | MSS | OV   |
| TCGA-26-1438 | MSS | GBM  |
| TCGA-26-5132 | MSS | GBM  |
| TCGA-26-5135 | MSS | GBM  |
| TCGA-27-1831 | MSS | GBM  |
| TCGA-27-2523 | MSS | GBM  |
| TCGA-27-2528 | MSS | GBM  |
| TCGA-29-1710 | MSS | OV   |
| TCGA-32-1970 | MSS | GBM  |
| TCGA-33-4586 | MSS | LUSC |
| TCGA-34-2596 | MSS | LUSC |
| TCGA-34-2600 | MSS | LUSC |
| TCGA-34-5240 | MSS | LUSC |
| TCGA-36-1570 | MSS | OV   |
| TCGA-36-1571 | MSS | OV   |
| TCGA-36-1574 | MSS | OV   |
| TCGA-37-4135 | MSS | LUSC |
| TCGA-38-4628 | MSS | LUAD |
| TCGA-38-4630 | MSS | LUAD |
| TCGA-43-3920 | MSS | LUSC |
| TCGA-44-2656 | MSS | LUAD |
| TCGA-44-2656 | MSS | LUAD |
| TCGA-44-2666 | MSS | LUAD |
| TCGA-44-2668 | MSS | LUAD |
| TCGA-44-2668 | MSS | LUAD |
| TCGA-44-3917 | MSS | LUAD |
| TCGA-44-3917 | MSS | LUAD |
| TCGA-44-3918 | MSS | LUAD |
| TCGA-44-4112 | MSS | LUAD |
| TCGA-44-4112 | MSS | LUAD |
| TCGA-44-5645 | MSS | LUAD |
| TCGA-44-5645 | MSS | LUAD |
| TCGA-44-6146 | MSS | LUAD |
| TCGA-44-6147 | MSS | LUAD |
| TCGA-44-6147 | MSS | LUAD |
| TCGA-44-6148 | MSS | LUAD |
| TCGA-44-6775 | MSS | LUAD |
| TCGA-49-4486 | MSS | LUAD |
| TCGA-49-6742 | MSS | LUAD |
| TCGA-50-5066 | MSS | LUAD |

|              |     |      |
|--------------|-----|------|
| TCGA-50-5930 | MSS | LUAD |
| TCGA-50-5932 | MSS | LUAD |
| TCGA-50-6591 | MSS | LUAD |
| TCGA-50-6597 | MSS | LUAD |
| TCGA-52-7812 | MSS | LUSC |
| TCGA-55-1594 | MSS | LUAD |
| TCGA-55-1596 | MSS | LUAD |
| TCGA-55-6972 | MSS | LUAD |
| TCGA-55-6982 | MSS | LUAD |
| TCGA-55-6984 | MSS | LUAD |
| TCGA-55-6986 | MSS | LUAD |
| TCGA-55-7281 | MSS | LUAD |
| TCGA-56-1622 | MSS | LUSC |
| TCGA-56-7582 | MSS | LUSC |
| TCGA-60-2695 | MSS | LUSC |
| TCGA-60-2698 | MSS | LUSC |
| TCGA-60-2711 | MSS | LUSC |
| TCGA-60-2713 | MSS | LUSC |
| TCGA-60-2719 | MSS | LUSC |
| TCGA-60-2726 | MSS | LUSC |
| TCGA-61-2000 | MSS | OV   |
| TCGA-61-2095 | MSS | OV   |
| TCGA-64-1678 | MSS | LUAD |
| TCGA-64-1680 | MSS | LUAD |
| TCGA-66-2744 | MSS | LUSC |
| TCGA-66-2756 | MSS | LUSC |
| TCGA-66-2757 | MSS | LUSC |
| TCGA-66-2759 | MSS | LUSC |
| TCGA-66-2766 | MSS | LUSC |
| TCGA-66-2789 | MSS | LUSC |
| TCGA-66-2793 | MSS | LUSC |
| TCGA-66-2795 | MSS | LUSC |
| TCGA-67-3771 | MSS | LUAD |
| TCGA-67-6215 | MSS | LUAD |
| TCGA-73-4659 | MSS | LUAD |
| TCGA-73-4666 | MSS | LUAD |
| TCGA-75-5147 | MSS | LUAD |
| TCGA-75-6203 | MSS | LUAD |
| TCGA-75-7030 | MSS | LUAD |
| TCGA-77-6843 | MSS | LUSC |
| TCGA-77-7139 | MSS | LUSC |
| TCGA-78-7143 | MSS | LUAD |
| TCGA-78-7146 | MSS | LUAD |
| TCGA-78-7156 | MSS | LUAD |
| TCGA-78-7158 | MSS | LUAD |
| TCGA-78-7535 | MSS | LUAD |
| TCGA-85-8052 | MSS | LUSC |
| TCGA-85-8277 | MSS | LUSC |
| TCGA-90-7767 | MSS | LUSC |
| TCGA-91-6840 | MSS | LUAD |
| TCGA-91-6847 | MSS | LUAD |
| TCGA-92-8064 | MSS | LUSC |

|              |       |      |
|--------------|-------|------|
| TCGA-94-7943 | MSS   | LUSC |
| TCGA-97-8171 | MSS   | LUAD |
| TCGA-98-8022 | MSS   | LUSC |
| TCGA-A1-A0SM | MSS   | BRCA |
| TCGA-A2-A04P | MSS   | BRCA |
| TCGA-A2-A04Q | MSS   | BRCA |
| TCGA-A2-A04T | MSS   | BRCA |
| TCGA-A2-A04X | MSS   | BRCA |
| TCGA-A2-A0CM | MSS   | BRCA |
| TCGA-A2-A0D0 | MSS   | BRCA |
| TCGA-A2-A0D1 | MSS   | BRCA |
| TCGA-A2-A0D2 | MSS   | BRCA |
| TCGA-A2-A0D4 | MSS   | BRCA |
| TCGA-A2-A0EY | MSS   | BRCA |
| TCGA-A2-A0YG | MSS   | BRCA |
| TCGA-A2-A259 | MSS   | BRCA |
| TCGA-A2-A25B | MSS   | BRCA |
| TCGA-A2-A3XX | MSS   | BRCA |
| TCGA-A2-A3Y0 | MSS   | BRCA |
| TCGA-A3-3308 | MSS   | KIRC |
| TCGA-A3-3324 | MSS   | KIRC |
| TCGA-A3-3363 | MSS   | KIRC |
| TCGA-A3-3370 | MSS   | KIRC |
| TCGA-A3-3372 | MSS   | KIRC |
| TCGA-A3-3387 | MSS   | KIRC |
| TCGA-A4-A48D | MSS   | KIRP |
| TCGA-A4-A4ZT | MSS   | KIRP |
| TCGA-A5-A0GA | MSI-H | UCEC |
| TCGA-A6-2680 | MSS   | COAD |
| TCGA-A6-2681 | MSS   | COAD |
| TCGA-A6-2683 | MSS   | COAD |
| TCGA-A6-3807 | MSS   | COAD |
| TCGA-A6-6141 | MSS   | COAD |
| TCGA-A6-6781 | MSI-H | COAD |
| TCGA-A6-A565 | MSS   | COAD |
| TCGA-A6-A566 | MSS   | COAD |
| TCGA-A6-A567 | MSS   | COAD |
| TCGA-A6-A56B | MSS   | COAD |
| TCGA-A7-A0CE | MSS   | BRCA |
| TCGA-A7-A26G | MSS   | BRCA |
| TCGA-A7-A26J | MSS   | BRCA |
| TCGA-A7-A26J | MSS   | BRCA |
| TCGA-A8-A075 | MSS   | BRCA |
| TCGA-A8-A07B | MSS   | BRCA |
| TCGA-A8-A07I | MSS   | BRCA |
| TCGA-A8-A08B | MSS   | BRCA |
| TCGA-A8-A08L | MSS   | BRCA |
| TCGA-A8-A08S | MSS   | BRCA |
| TCGA-A8-A092 | MSS   | BRCA |
| TCGA-A8-A094 | MSS   | BRCA |
| TCGA-A8-A09I | MSS   | BRCA |
| TCGA-A8-A09X | MSS   | BRCA |

|              |       |      |
|--------------|-------|------|
| TCGA-AA-3514 | MSS   | COAD |
| TCGA-AA-3516 | MSI-H | COAD |
| TCGA-AA-3518 | MSI-H | COAD |
| TCGA-AA-3529 | MSS   | COAD |
| TCGA-AA-3534 | MSS   | COAD |
| TCGA-AA-3555 | MSS   | COAD |
| TCGA-AA-3664 | MSS   | COAD |
| TCGA-AA-3666 | MSS   | COAD |
| TCGA-AA-3685 | MSS   | COAD |
| TCGA-AA-3956 | MSS   | COAD |
| TCGA-AA-3977 | MSS   | COAD |
| TCGA-AA-3994 | MSS   | COAD |
| TCGA-AA-A00N | MSS   | COAD |
| TCGA-AA-A00R | MSI-H | COAD |
| TCGA-AA-A01R | MSI-H | COAD |
| TCGA-AA-A01S | MSS   | COAD |
| TCGA-AA-A01T | MSS   | COAD |
| TCGA-AA-A01V | MSS   | COAD |
| TCGA-AA-A01X | MSS   | COAD |
| TCGA-AA-A02O | MSS   | COAD |
| TCGA-AA-A02Y | MSS   | COAD |
| TCGA-AA-A03F | MSS   | COAD |
| TCGA-AB-2905 | MSS   | LAML |
| TCGA-AB-2906 | MSS   | LAML |
| TCGA-AB-2907 | MSS   | LAML |
| TCGA-AB-2963 | MSS   | LAML |
| TCGA-AB-2964 | MSS   | LAML |
| TCGA-AB-2965 | MSS   | LAML |
| TCGA-AB-2966 | MSS   | LAML |
| TCGA-AB-2967 | MSS   | LAML |
| TCGA-AB-2968 | MSS   | LAML |
| TCGA-AB-2970 | MSS   | LAML |
| TCGA-AB-2971 | MSS   | LAML |
| TCGA-AB-2972 | MSS   | LAML |
| TCGA-AB-2973 | MSS   | LAML |
| TCGA-AB-2974 | MSS   | LAML |
| TCGA-AB-2975 | MSS   | LAML |
| TCGA-AB-2976 | MSS   | LAML |
| TCGA-AB-2977 | MSS   | LAML |
| TCGA-AB-2978 | MSS   | LAML |
| TCGA-AB-2979 | MSS   | LAML |
| TCGA-AB-2980 | MSS   | LAML |
| TCGA-AB-2981 | MSS   | LAML |
| TCGA-AB-2982 | MSS   | LAML |
| TCGA-AB-2983 | MSS   | LAML |
| TCGA-AB-2985 | MSS   | LAML |
| TCGA-AB-2986 | MSS   | LAML |
| TCGA-AB-2987 | MSS   | LAML |
| TCGA-AB-2988 | MSS   | LAML |
| TCGA-AB-2990 | MSS   | LAML |
| TCGA-AB-2991 | MSS   | LAML |
| TCGA-AB-2992 | MSS   | LAML |

|              |       |      |
|--------------|-------|------|
| TCGA-AB-2993 | MSS   | LAML |
| TCGA-AB-2994 | MSS   | LAML |
| TCGA-AB-2995 | MSS   | LAML |
| TCGA-AB-2996 | MSS   | LAML |
| TCGA-AB-2997 | MSS   | LAML |
| TCGA-AB-2998 | MSS   | LAML |
| TCGA-AB-2999 | MSS   | LAML |
| TCGA-AB-3000 | MSS   | LAML |
| TCGA-AB-3001 | MSS   | LAML |
| TCGA-AB-3002 | MSS   | LAML |
| TCGA-AB-3005 | MSS   | LAML |
| TCGA-AB-3007 | MSS   | LAML |
| TCGA-AB-3008 | MSS   | LAML |
| TCGA-AB-3009 | MSS   | LAML |
| TCGA-AB-3011 | MSS   | LAML |
| TCGA-AB-3012 | MSS   | LAML |
| TCGA-AC-A2BK | MSS   | BRCA |
| TCGA-AD-6964 | MSI-H | COAD |
| TCGA-AD-A5EJ | MSI-H | COAD |
| TCGA-AD-A5EK | MSS   | COAD |
| TCGA-AF-2689 | MSS   | READ |
| TCGA-AF-2691 | MSS   | READ |
| TCGA-AF-3913 | MSS   | READ |
| TCGA-AG-3574 | MSS   | READ |
| TCGA-AG-3582 | MSS   | READ |
| TCGA-AG-3593 | MSS   | READ |
| TCGA-AG-3727 | MSS   | READ |
| TCGA-AG-3885 | MSS   | READ |
| TCGA-AG-3890 | MSS   | READ |
| TCGA-AG-3896 | MSS   | READ |
| TCGA-AG-3901 | MSS   | READ |
| TCGA-AG-4007 | MSS   | READ |
| TCGA-AG-4008 | MSS   | READ |
| TCGA-AG-4015 | MSS   | READ |
| TCGA-AG-A002 | MSS   | READ |
| TCGA-AG-A032 | MSS   | READ |
| TCGA-AJ-A23M | MSS   | UCEC |
| TCGA-AK-3428 | MSS   | KIRC |
| TCGA-AK-3454 | MSS   | KIRC |
| TCGA-AK-3455 | MSS   | KIRC |
| TCGA-AL-3467 | MSS   | KIRP |
| TCGA-AL-3468 | MSS   | KIRP |
| TCGA-AL-3472 | MSS   | KIRP |
| TCGA-AN-A04D | MSS   | BRCA |
| TCGA-AN-A0AT | MSS   | BRCA |
| TCGA-AN-A0G0 | MSS   | BRCA |
| TCGA-AN-A0XR | MSS   | BRCA |
| TCGA-AO-A03L | MSS   | BRCA |
| TCGA-AO-A03N | MSS   | BRCA |
| TCGA-AO-A0J2 | MSS   | BRCA |
| TCGA-AO-A0J4 | MSS   | BRCA |
| TCGA-AO-A0J6 | MSS   | BRCA |



|              |       |      |
|--------------|-------|------|
| TCGA-AO-A0JM | MSS   | BRCA |
| TCGA-AO-A124 | MSS   | BRCA |
| TCGA-AO-A12H | MSS   | BRCA |
| TCGA-AP-A051 | MSI-H | UCEC |
| TCGA-AP-A052 | MSS   | UCEC |
| TCGA-AP-A05A | MSS   | UCEC |
| TCGA-AP-A05D | MSS   | UCEC |
| TCGA-AP-A0LE | MSI-H | UCEC |
| TCGA-AP-A0LF | MSS   | UCEC |
| TCGA-AQ-A04J | MSS   | BRCA |
| TCGA-AR-A0TX | MSS   | BRCA |
| TCGA-AR-A1AY | MSS   | BRCA |
| TCGA-AR-A24Z | MSS   | BRCA |
| TCGA-AR-A256 | MSS   | BRCA |
| TCGA-AR-A2LK | MSS   | BRCA |
| TCGA-AX-A05S | MSI-H | UCEC |
| TCGA-AX-A06B | MSS   | UCEC |
| TCGA-AX-A1C8 | MSS   | UCEC |
| TCGA-AX-A1CI | MSS   | UCEC |
| TCGA-AX-A2H5 | MSS   | UCEC |
| TCGA-AY-A54L | MSS   | COAD |
| TCGA-AZ-4315 | MSS   | COAD |
| TCGA-AZ-6601 | MSI-H | COAD |
| TCGA-B0-5094 | MSS   | KIRC |
| TCGA-B0-5695 | MSS   | KIRC |
| TCGA-B1-A47N | MSS   | KIRP |
| TCGA-B1-A47O | MSS   | KIRP |
| TCGA-B2-3924 | MSS   | KIRC |
| TCGA-B2-4099 | MSS   | KIRC |
| TCGA-B2-4101 | MSS   | KIRC |
| TCGA-B2-4102 | MSS   | KIRC |
| TCGA-B2-5633 | MSS   | KIRC |
| TCGA-B2-5635 | MSS   | KIRC |
| TCGA-B3-3925 | MSS   | KIRP |
| TCGA-B3-3926 | MSS   | KIRP |
| TCGA-B3-4103 | MSS   | KIRP |
| TCGA-B3-4104 | MSS   | KIRP |
| TCGA-B5-A0K3 | MSS   | UCEC |
| TCGA-B5-A0K8 | MSS   | UCEC |
| TCGA-B5-A11H | MSI-H | UCEC |
| TCGA-B5-A11I | MSS   | UCEC |
| TCGA-B5-A1MY | MSS   | UCEC |
| TCGA-B6-A0I1 | MSS   | BRCA |
| TCGA-B6-A0I2 | MSS   | BRCA |
| TCGA-B6-A0I6 | MSS   | BRCA |
| TCGA-B6-A0IJ | MSS   | BRCA |
| TCGA-B6-A0IQ | MSS   | BRCA |
| TCGA-B6-A0RE | MSS   | BRCA |
| TCGA-B6-A0RT | MSS   | BRCA |
| TCGA-B6-A0RU | MSS   | BRCA |
| TCGA-B6-A0WX | MSS   | BRCA |
| TCGA-B6-A0X5 | MSS   | BRCA |

|              |       |      |
|--------------|-------|------|
| TCGA-B9-4115 | MSS   | KIRP |
| TCGA-B9-4116 | MSS   | KIRP |
| TCGA-B9-4617 | MSS   | KIRP |
| TCGA-B9-A44B | MSS   | KIRP |
| TCGA-BA-4076 | MSS   | HNSC |
| TCGA-BA-4077 | MSS   | HNSC |
| TCGA-BA-5149 | MSS   | HNSC |
| TCGA-BA-5153 | MSS   | HNSC |
| TCGA-BA-5556 | MSS   | HNSC |
| TCGA-BA-6869 | MSS   | HNSC |
| TCGA-BA-6872 | MSS   | HNSC |
| TCGA-BA-6873 | MSS   | HNSC |
| TCGA-BA-A4IH | MSS   | HNSC |
| TCGA-BB-4225 | MSS   | HNSC |
| TCGA-BC-A216 | MSS   | LIHC |
| TCGA-BC-A217 | MSS   | LIHC |
| TCGA-BG-A18C | MSS   | UCEC |
| TCGA-BH-A0AV | MSS   | BRCA |
| TCGA-BH-A0B3 | MSS   | BRCA |
| TCGA-BH-A0B9 | MSS   | BRCA |
| TCGA-BH-A0BW | MSS   | BRCA |
| TCGA-BH-A0DG | MSS   | BRCA |
| TCGA-BH-A0DT | MSS   | BRCA |
| TCGA-BH-A0E0 | MSS   | BRCA |
| TCGA-BH-A0EA | MSS   | BRCA |
| TCGA-BH-A0H0 | MSS   | BRCA |
| TCGA-BH-A0H6 | MSS   | BRCA |
| TCGA-BH-A0WA | MSS   | BRCA |
| TCGA-BH-A18R | MSS   | BRCA |
| TCGA-BH-A18U | MSS   | BRCA |
| TCGA-BH-A1FC | MSS   | BRCA |
| TCGA-BJ-A0Z2 | MSS   | THCA |
| TCGA-BJ-A0ZB | MSS   | THCA |
| TCGA-BJ-A191 | MSS   | THCA |
| TCGA-BJ-A28V | MSS   | THCA |
| TCGA-BJ-A45K | MSS   | THCA |
| TCGA-BK-A0CC | MSS   | UCEC |
| TCGA-BK-A139 | MSS   | UCEC |
| TCGA-BL-A0C8 | MSS   | BLCA |
| TCGA-BL-A13J | MSS   | BLCA |
| TCGA-BL-A13J | MSS   | BLCA |
| TCGA-BP-4326 | MSS   | KIRC |
| TCGA-BP-4327 | MSS   | KIRC |
| TCGA-BP-4781 | MSS   | KIRC |
| TCGA-BP-4807 | MSS   | KIRC |
| TCGA-BP-4968 | MSS   | KIRC |
| TCGA-BP-5010 | MSS   | KIRC |
| TCGA-BP-5168 | MSS   | KIRC |
| TCGA-BR-4255 | MSS   | STAD |
| TCGA-BR-4280 | MSI-H | STAD |
| TCGA-BR-6452 | MSI-H | STAD |
| TCGA-BR-6456 | MSS   | STAD |

|              |       |      |
|--------------|-------|------|
| TCGA-BR-6564 | MSS   | STAD |
| TCGA-BR-7722 | MSS   | STAD |
| TCGA-BR-8373 | MSS   | STAD |
| TCGA-BR-8381 | MSS   | STAD |
| TCGA-BR-8486 | MSS   | STAD |
| TCGA-BR-8682 | MSS   | STAD |
| TCGA-BR-8690 | MSS   | STAD |
| TCGA-BR-A4J4 | MSS   | STAD |
| TCGA-BS-A0U9 | MSS   | UCEC |
| TCGA-BT-A20Q | MSS   | BLCA |
| TCGA-BT-A20T | MSS   | BLCA |
| TCGA-BT-A20V | MSS   | BLCA |
| TCGA-BT-A2LA | MSS   | BLCA |
| TCGA-BT-A3PH | MSS   | BLCA |
| TCGA-BT-A3PJ | MSS   | BLCA |
| TCGA-BW-A5NP | MSS   | LIHC |
| TCGA-C4-A0F7 | MSS   | BLCA |
| TCGA-C5-A0TN | MSS   | CESC |
| TCGA-C5-A1BF | MSS   | CESC |
| TCGA-C5-A1BJ | MSS   | CESC |
| TCGA-C5-A1BN | MSS   | CESC |
| TCGA-C5-A1M8 | MSS   | CESC |
| TCGA-C5-A1M9 | MSS   | CESC |
| TCGA-C5-A1MI | MSS   | CESC |
| TCGA-C5-A1ML | MSS   | CESC |
| TCGA-C5-A1MQ | MSS   | CESC |
| TCGA-C5-A2LT | MSS   | CESC |
| TCGA-C5-A2LV | MSS   | CESC |
| TCGA-C5-A2LY | MSS   | CESC |
| TCGA-C8-A12L | MSS   | BRCA |
| TCGA-C8-A12Q | MSS   | BRCA |
| TCGA-C8-A130 | MSS   | BRCA |
| TCGA-CA-6717 | MSS   | COAD |
| TCGA-CA-6718 | MSS   | COAD |
| TCGA-CC-5260 | MSS   | LIHC |
| TCGA-CC-5261 | MSS   | LIHC |
| TCGA-CD-5799 | MSS   | STAD |
| TCGA-CD-5802 | MSS   | STAD |
| TCGA-CD-8529 | MSS   | STAD |
| TCGA-CF-A27C | MSS   | BLCA |
| TCGA-CF-A3MF | MSS   | BLCA |
| TCGA-CG-4442 | MSI-H | STAD |
| TCGA-CG-4443 | MSS   | STAD |
| TCGA-CG-4474 | MSS   | STAD |
| TCGA-CG-5723 | MSI-H | STAD |
| TCGA-CG-5724 | MSS   | STAD |
| TCGA-CG-5730 | MSS   | STAD |
| TCGA-CJ-4639 | MSS   | KIRC |
| TCGA-CJ-4870 | MSS   | KIRC |
| TCGA-CJ-4878 | MSS   | KIRC |
| TCGA-CJ-4885 | MSS   | KIRC |
| TCGA-CJ-4899 | MSS   | KIRC |

|              |     |      |
|--------------|-----|------|
| TCGA-CJ-4918 | MSS | KIRC |
| TCGA-CJ-5681 | MSS | KIRC |
| TCGA-CJ-5682 | MSS | KIRC |
| TCGA-CJ-6033 | MSS | KIRC |
| TCGA-CN-4737 | MSS | HNSC |
| TCGA-CN-4741 | MSS | HNSC |
| TCGA-CN-5365 | MSS | HNSC |
| TCGA-CN-5374 | MSS | HNSC |
| TCGA-CN-6011 | MSS | HNSC |
| TCGA-CN-6989 | MSS | HNSC |
| TCGA-CN-6994 | MSS | HNSC |
| TCGA-CQ-6225 | MSS | HNSC |
| TCGA-CQ-6228 | MSS | HNSC |
| TCGA-CR-5249 | MSS | HNSC |
| TCGA-CR-5250 | MSS | HNSC |
| TCGA-CR-6467 | MSS | HNSC |
| TCGA-CR-6470 | MSS | HNSC |
| TCGA-CR-6472 | MSS | HNSC |
| TCGA-CR-6480 | MSS | HNSC |
| TCGA-CR-6482 | MSS | HNSC |
| TCGA-CR-6487 | MSS | HNSC |
| TCGA-CR-6491 | MSS | HNSC |
| TCGA-CR-7382 | MSS | HNSC |
| TCGA-CR-7385 | MSS | HNSC |
| TCGA-CR-7391 | MSS | HNSC |
| TCGA-CR-7404 | MSS | HNSC |
| TCGA-CS-5395 | MSS | LGG  |
| TCGA-CS-6186 | MSS | LGG  |
| TCGA-CS-6665 | MSS | LGG  |
| TCGA-CS-6668 | MSS | LGG  |
| TCGA-CS-6669 | MSS | LGG  |
| TCGA-CV-5431 | MSS | HNSC |
| TCGA-CV-5432 | MSS | HNSC |
| TCGA-CV-5442 | MSS | HNSC |
| TCGA-CV-5443 | MSS | HNSC |
| TCGA-CV-5973 | MSS | HNSC |
| TCGA-CV-6433 | MSS | HNSC |
| TCGA-CV-6956 | MSS | HNSC |
| TCGA-CV-6961 | MSS | HNSC |
| TCGA-CV-7090 | MSS | HNSC |
| TCGA-CV-7100 | MSS | HNSC |
| TCGA-CV-7180 | MSS | HNSC |
| TCGA-CV-7255 | MSS | HNSC |
| TCGA-CV-7416 | MSS | HNSC |
| TCGA-CV-7432 | MSS | HNSC |
| TCGA-CW-5585 | MSS | KIRC |
| TCGA-CW-6087 | MSS | KIRC |
| TCGA-CW-6093 | MSS | KIRC |
| TCGA-CX-7086 | MSS | HNSC |
| TCGA-CZ-4856 | MSS | KIRC |
| TCGA-CZ-5453 | MSS | KIRC |
| TCGA-CZ-5454 | MSS | KIRC |

|              |       |      |
|--------------|-------|------|
| TCGA-CZ-5987 | MSS   | KIRC |
| TCGA-D1-A16G | MSS   | UCEC |
| TCGA-D1-A1NU | MSS   | UCEC |
| TCGA-D3-A1Q1 | MSS   | SKCM |
| TCGA-D3-A1Q5 | MSS   | SKCM |
| TCGA-D3-A3MO | MSS   | SKCM |
| TCGA-D5-6540 | MSI-H | COAD |
| TCGA-D7-5579 | MSS   | STAD |
| TCGA-D7-6519 | MSS   | STAD |
| TCGA-D7-6527 | MSS   | STAD |
| TCGA-D7-6528 | MSS   | STAD |
| TCGA-D7-6815 | MSS   | STAD |
| TCGA-D7-6822 | MSS   | STAD |
| TCGA-D7-8570 | MSS   | STAD |
| TCGA-D7-A4YX | MSS   | STAD |
| TCGA-D8-A27F | MSS   | BRCA |
| TCGA-D8-A27H | MSS   | BRCA |
| TCGA-D9-A148 | MSS   | SKCM |
| TCGA-DA-A1HV | MSS   | SKCM |
| TCGA-DA-A1HW | MSS   | SKCM |
| TCGA-DA-A1HY | MSS   | SKCM |
| TCGA-DA-A1I0 | MSS   | SKCM |
| TCGA-DA-A1I2 | MSS   | SKCM |
| TCGA-DA-A1I8 | MSS   | SKCM |
| TCGA-DA-A1IC | MSS   | SKCM |
| TCGA-DA-A3F3 | MSS   | SKCM |
| TCGA-DA-A3F5 | MSS   | SKCM |
| TCGA-DA-A3F8 | MSS   | SKCM |
| TCGA-DB-5278 | MSS   | LGG  |
| TCGA-DD-A1EB | MSS   | LIHC |
| TCGA-DD-A1EJ | MSS   | LIHC |
| TCGA-DD-A3A6 | MSS   | LIHC |
| TCGA-DD-A3A8 | MSS   | LIHC |
| TCGA-DD-A3A9 | MSS   | LIHC |
| TCGA-DD-A4NA | MSS   | LIHC |
| TCGA-DD-A4NB | MSS   | LIHC |
| TCGA-DD-A4NE | MSS   | LIHC |
| TCGA-DD-A4NG | MSS   | LIHC |
| TCGA-DE-A0Y3 | MSS   | THCA |
| TCGA-DE-A2OL | MSS   | THCA |
| TCGA-DE-A3KN | MSS   | THCA |
| TCGA-DG-A2KJ | MSS   | CESC |
| TCGA-DH-A669 | MSS   | LGG  |
| TCGA-DI-A1NN | MSS   | UCEC |
| TCGA-DJ-A13L | MSS   | THCA |
| TCGA-DJ-A13R | MSS   | THCA |
| TCGA-DJ-A13W | MSS   | THCA |
| TCGA-DJ-A1QL | MSS   | THCA |
| TCGA-DJ-A2Q1 | MSS   | THCA |
| TCGA-DJ-A2Q2 | MSS   | THCA |
| TCGA-DJ-A3US | MSS   | THCA |
| TCGA-DK-A1A5 | MSS   | BLCA |

|              |     |      |
|--------------|-----|------|
| TCGA-DK-A1A6 | MSS | BLCA |
| TCGA-DK-A1A7 | MSS | BLCA |
| TCGA-DK-A1AA | MSS | BLCA |
| TCGA-DK-A1AE | MSS | BLCA |
| TCGA-DK-A1AG | MSS | BLCA |
| TCGA-DK-A3IL | MSS | BLCA |
| TCGA-DQ-5625 | MSS | HNSC |
| TCGA-DQ-5629 | MSS | HNSC |
| TCGA-DS-A0VL | MSS | CESC |
| TCGA-DU-5870 | MSS | LGG  |
| TCGA-DU-5870 | MSS | LGG  |
| TCGA-DU-5872 | MSS | LGG  |
| TCGA-DU-5872 | MSS | LGG  |
| TCGA-DU-5874 | MSS | LGG  |
| TCGA-DU-6397 | MSS | LGG  |
| TCGA-DU-6401 | MSS | LGG  |
| TCGA-DU-6404 | MSS | LGG  |
| TCGA-DU-6404 | MSS | LGG  |
| TCGA-DU-6407 | MSS | LGG  |
| TCGA-DU-6407 | MSS | LGG  |
| TCGA-DU-7009 | MSS | LGG  |
| TCGA-DU-7013 | MSS | LGG  |
| TCGA-DU-7301 | MSS | LGG  |
| TCGA-DV-5566 | MSS | KIRC |
| TCGA-DX-A1KU | MSS | SARC |
| TCGA-DX-A1KW | MSS | SARC |
| TCGA-DX-A1L0 | MSS | SARC |
| TCGA-DX-A1L2 | MSS | SARC |
| TCGA-DX-A1L3 | MSS | SARC |
| TCGA-DX-A23R | MSS | SARC |
| TCGA-DX-A240 | MSS | SARC |
| TCGA-DX-A2IZ | MSS | SARC |
| TCGA-DX-A2J0 | MSS | SARC |
| TCGA-DX-A2J4 | MSS | SARC |
| TCGA-DX-A3LS | MSS | SARC |
| TCGA-DX-A3LT | MSS | SARC |
| TCGA-DX-A3LU | MSS | SARC |
| TCGA-DX-A3LW | MSS | SARC |
| TCGA-DX-A3LY | MSS | SARC |
| TCGA-DX-A3M1 | MSS | SARC |
| TCGA-DX-A3U5 | MSS | SARC |
| TCGA-DX-A3U6 | MSS | SARC |
| TCGA-DX-A3U7 | MSS | SARC |
| TCGA-DX-A3U8 | MSS | SARC |
| TCGA-DX-A48U | MSS | SARC |
| TCGA-DX-A6Z2 | MSS | SARC |
| TCGA-E1-5318 | MSS | LGG  |
| TCGA-E1-5319 | MSS | LGG  |
| TCGA-E2-A109 | MSS | BRCA |
| TCGA-E2-A14P | MSS | BRCA |
| TCGA-E2-A14X | MSS | BRCA |
| TCGA-E2-A152 | MSS | BRCA |

|              |     |      |
|--------------|-----|------|
| TCGA-E2-A15E | MSS | BRCA |
| TCGA-E2-A15H | MSS | BRCA |
| TCGA-E2-A15K | MSS | BRCA |
| TCGA-E2-A15K | MSS | BRCA |
| TCGA-E2-A1LG | MSS | BRCA |
| TCGA-E2-A1LK | MSS | BRCA |
| TCGA-E2-A1LL | MSS | BRCA |
| TCGA-E6-A1LZ | MSS | UCEC |
| TCGA-E8-A418 | MSS | THCA |
| TCGA-E9-A1NH | MSS | BRCA |
| TCGA-EB-A24D | MSS | SKCM |
| TCGA-ED-A459 | MSS | LIHC |
| TCGA-ED-A4XI | MSS | LIHC |
| TCGA-EE-A185 | MSS | SKCM |
| TCGA-EE-A29B | MSS | SKCM |
| TCGA-EE-A2A0 | MSS | SKCM |
| TCGA-EE-A2GN | MSS | SKCM |
| TCGA-EE-A2GT | MSS | SKCM |
| TCGA-EE-A2M5 | MSS | SKCM |
| TCGA-EE-A2MI | MSS | SKCM |
| TCGA-EE-A3J5 | MSS | SKCM |
| TCGA-EE-A3JI | MSS | SKCM |
| TCGA-EI-6917 | MSS | READ |
| TCGA-EK-A2PK | MSS | CESC |
| TCGA-EK-A2R9 | MSS | CESC |
| TCGA-EK-A2RE | MSS | CESC |
| TCGA-EK-A2RL | MSS | CESC |
| TCGA-EK-A2RM | MSS | CESC |
| TCGA-EL-A3CV | MSS | THCA |
| TCGA-EL-A3CX | MSS | THCA |
| TCGA-EL-A3MY | MSS | THCA |
| TCGA-EL-A3T0 | MSS | THCA |
| TCGA-EL-A3TB | MSS | THCA |
| TCGA-EL-A4K6 | MSS | THCA |
| TCGA-EM-A220 | MSS | THCA |
| TCGA-EM-A2CN | MSS | THCA |
| TCGA-EM-A2CP | MSS | THCA |
| TCGA-EM-A2CU | MSS | THCA |
| TCGA-EM-A2OV | MSS | THCA |
| TCGA-EM-A2OW | MSS | THCA |
| TCGA-EM-A3AL | MSS | THCA |
| TCGA-EM-A3AQ | MSS | THCA |
| TCGA-EM-A3FL | MSS | THCA |
| TCGA-EM-A3FR | MSS | THCA |
| TCGA-EO-A1Y8 | MSS | UCEC |
| TCGA-EP-A26S | MSS | LIHC |
| TCGA-EP-A2KB | MSS | LIHC |
| TCGA-EP-A3RK | MSS | LIHC |
| TCGA-EQ-5647 | MSS | STAD |
| TCGA-ER-A19D | MSS | SKCM |
| TCGA-ER-A19E | MSS | SKCM |
| TCGA-ER-A19J | MSS | SKCM |

|              |       |      |
|--------------|-------|------|
| TCGA-ER-A19L | MSS   | SKCM |
| TCGA-ER-A19T | MSS   | SKCM |
| TCGA-ER-A19T | MSS   | SKCM |
| TCGA-ER-A2NF | MSS   | SKCM |
| TCGA-ER-A2NF | MSS   | SKCM |
| TCGA-ER-A3ES | MSS   | SKCM |
| TCGA-ES-A2HS | MSS   | LIHC |
| TCGA-ES-A2HT | MSS   | LIHC |
| TCGA-ET-A2N1 | MSS   | THCA |
| TCGA-ET-A3DV | MSS   | THCA |
| TCGA-EW-A1P8 | MSS   | BRCA |
| TCGA-EW-A1PB | MSS   | BRCA |
| TCGA-EW-A1PC | MSS   | BRCA |
| TCGA-EW-A1PH | MSS   | BRCA |
| TCGA-EW-A3U0 | MSS   | BRCA |
| TCGA-EX-A1H5 | MSS   | CESC |
| TCGA-EY-A1GS | MSS   | UCEC |
| TCGA-EY-A1GW | MSS   | UCEC |
| TCGA-EZ-7264 | MSS   | LGG  |
| TCGA-F1-6177 | MSI-H | STAD |
| TCGA-F1-6875 | MSS   | STAD |
| TCGA-F5-6814 | MSS   | READ |
| TCGA-FD-A3N5 | MSS   | BLCA |
| TCGA-FD-A3N6 | MSS   | BLCA |
| TCGA-FE-A22Z | MSS   | THCA |
| TCGA-FG-5964 | MSS   | LGG  |
| TCGA-FG-5965 | MSS   | LGG  |
| TCGA-FG-7643 | MSS   | LGG  |
| TCGA-FG-8182 | MSS   | LGG  |
| TCGA-FG-A4MT | MSS   | LGG  |
| TCGA-FG-A4MT | MSS   | LGG  |
| TCGA-FK-A3S3 | MSS   | THCA |
| TCGA-FK-A3SD | MSS   | THCA |
| TCGA-FK-A3SE | MSS   | THCA |
| TCGA-FP-7998 | MSS   | STAD |
| TCGA-FS-A1ZD | MSS   | SKCM |
| TCGA-FS-A1ZK | MSS   | SKCM |
| TCGA-FS-A1ZP | MSS   | SKCM |
| TCGA-FS-A1ZU | MSS   | SKCM |
| TCGA-FT-A3EE | MSS   | BLCA |
| TCGA-FV-A2QQ | MSS   | LIHC |
| TCGA-FV-A3R2 | MSS   | LIHC |
| TCGA-FV-A3R3 | MSS   | LIHC |
| TCGA-FV-A495 | MSS   | LIHC |
| TCGA-FV-A496 | MSS   | LIHC |
| TCGA-FV-A4ZQ | MSS   | LIHC |
| TCGA-FX-A2QS | MSS   | SARC |
| TCGA-FX-A3NJ | MSS   | SARC |
| TCGA-FX-A3RE | MSS   | SARC |
| TCGA-FX-A48G | MSS   | SARC |
| TCGA-FY-A2QD | MSS   | THCA |
| TCGA-G3-A25S | MSS   | LIHC |



|              |     |      |
|--------------|-----|------|
| TCGA-G3-A25T | MSS | LIHC |
| TCGA-G3-A25Y | MSS | LIHC |
| TCGA-G3-A5SL | MSS | LIHC |
| TCGA-GD-A2C5 | MSS | BLCA |
| TCGA-GI-A2C9 | MSS | BRCA |
| TCGA-GL-A4EM | MSS | KIRP |
| TCGA-GM-A2DF | MSS | BRCA |
| TCGA-GM-A3XL | MSS | BRCA |
| TCGA-GN-A262 | MSS | SKCM |
| TCGA-GN-A264 | MSS | SKCM |
| TCGA-GN-A266 | MSS | SKCM |
| TCGA-GN-A26A | MSS | SKCM |
| TCGA-GN-A26C | MSS | SKCM |
| TCGA-H4-A2HQ | MSS | BLCA |
| TCGA-HB-A43Z | MSS | SARC |
| TCGA-HB-A5W3 | MSS | SARC |
| TCGA-HD-7753 | MSS | HNSC |
| TCGA-HE-A5NI | MSS | KIRP |
| TCGA-HE-A5NK | MSS | KIRP |
| TCGA-HE-A5NL | MSS | KIRP |
| TCGA-HF-7136 | MSS | STAD |
| TCGA-HT-7695 | MSS | LGG  |
| TCGA-HT-8104 | MSS | LGG  |
| TCGA-HT-A5R7 | MSS | LGG  |
| TCGA-HT-A61B | MSS | LGG  |
| TCGA-HU-8245 | MSS | STAD |
| TCGA-HU-8608 | MSS | STAD |
| TCGA-HU-A4G6 | MSS | STAD |
| TCGA-HU-A4H0 | MSS | STAD |
| TCGA-HW-7486 | MSS | LGG  |
| TCGA-IA-A40Y | MSS | KIRP |
| TCGA-IE-A4EI | MSS | SARC |
| TCGA-IE-A4EK | MSS | SARC |
| TCGA-IF-A4AJ | MSS | SARC |
| TCGA-IG-A3YB | MSS | ESCA |
| TCGA-IG-A97I | MSS | ESCA |
| TCGA-IK-7675 | MSS | LGG  |
| TCGA-IN-7806 | MSS | STAD |
| TCGA-IS-A3K7 | MSS | SARC |
| TCGA-IS-A3KA | MSS | SARC |
| TCGA-IW-A3M4 | MSS | SARC |
| TCGA-IW-A3M5 | MSS | SARC |
| TCGA-JY-A93C | MSS | ESCA |
| TCGA-K1-A3PN | MSS | SARC |
| TCGA-K1-A3PN | MSS | SARC |
| TCGA-KL-8325 | MSS | KICH |
| TCGA-KL-8328 | MSS | KICH |
| TCGA-KL-8330 | MSS | KICH |
| TCGA-KL-8331 | MSS | KICH |
| TCGA-KL-8332 | MSS | KICH |
| TCGA-KL-8333 | MSS | KICH |
| TCGA-KL-8334 | MSS | KICH |

|              |     |      |
|--------------|-----|------|
| TCGA-KL-8337 | MSS | KICH |
| TCGA-KL-8341 | MSS | KICH |
| TCGA-KL-8342 | MSS | KICH |
| TCGA-KL-8343 | MSS | KICH |
| TCGA-KL-8344 | MSS | KICH |
| TCGA-KL-8346 | MSS | KICH |
| TCGA-KM-8438 | MSS | KICH |
| TCGA-KM-8439 | MSS | KICH |
| TCGA-KM-8443 | MSS | KICH |
| TCGA-KM-8476 | MSS | KICH |
| TCGA-KM-8477 | MSS | KICH |
| TCGA-KN-8418 | MSS | KICH |
| TCGA-KN-8419 | MSS | KICH |
| TCGA-KN-8421 | MSS | KICH |
| TCGA-KN-8422 | MSS | KICH |
| TCGA-KN-8424 | MSS | KICH |
| TCGA-KN-8425 | MSS | KICH |
| TCGA-KN-8426 | MSS | KICH |
| TCGA-KN-8428 | MSS | KICH |
| TCGA-KN-8429 | MSS | KICH |
| TCGA-KN-8430 | MSS | KICH |
| TCGA-KN-8431 | MSS | KICH |
| TCGA-KN-8432 | MSS | KICH |
| TCGA-KN-8434 | MSS | KICH |
| TCGA-KN-8435 | MSS | KICH |
| TCGA-KN-8437 | MSS | KICH |
| TCGA-KO-8405 | MSS | KICH |
| TCGA-KO-8406 | MSS | KICH |
| TCGA-KO-8407 | MSS | KICH |
| TCGA-KO-8409 | MSS | KICH |
| TCGA-KO-8410 | MSS | KICH |
| TCGA-KO-8416 | MSS | KICH |
| TCGA-KO-8417 | MSS | KICH |
| TCGA-L5-A4OF | MSS | ESCA |
| TCGA-L5-A4OJ | MSS | ESCA |
| TCGA-L5-A4OR | MSS | ESCA |
| TCGA-L5-A891 | MSS | ESCA |
| TCGA-L5-A8NE | MSS | ESCA |
| TCGA-L5-A8NN | MSS | ESCA |
| TCGA-L6-A4ET | MSS | THCA |
| TCGA-L7-A6VZ | MSS | ESCA |
| TCGA-LN-A49L | MSS | ESCA |
| TCGA-LN-A49M | MSS | ESCA |
| TCGA-LN-A49Y | MSS | ESCA |
| TCGA-LN-A4A1 | MSS | ESCA |
| TCGA-LN-A4A4 | MSS | ESCA |
| TCGA-LN-A5U5 | MSS | ESCA |
| TCGA-LN-A811 | MSS | ESCA |
| TCGA-MH-A55W | MSS | KIRP |
| TCGA-MH-A560 | MSS | KIRP |
| TCGA-MH-A561 | MSS | KIRP |
| TCGA-MO-A47R | MSS | SARC |

|              |       |      |
|--------------|-------|------|
| TCGA-N1-A6IA | MSS   | SARC |
| TCGA-NH-A50T | MSS   | COAD |
| TCGA-NH-A50V | MSS   | COAD |
| TCGA-PD-A5DF | MSS   | LIHC |
| TCGA-QG-A5YW | MSS   | COAD |
| TCGA-QG-A5YX | MSS   | COAD |
| TCGA-QG-A5Z1 | MSS   | COAD |
| TCGA-QG-A5Z2 | MSI-H | COAD |
| TCGA-TM-A7CF | MSS   | LGG  |
| TCGA-TM-A7CF | MSS   | LGG  |
| TCGA-TQ-A7RK | MSS   | LGG  |
| TCGA-TQ-A7RK | MSS   | LGG  |
| TCGA-TQ-A7RV | MSS   | LGG  |
| TCGA-TQ-A7RV | MSS   | LGG  |
| TCGA-TQ-A8XE | MSS   | LGG  |
| TCGA-V5-A7RC | MSS   | ESCA |
| TCGA-V5-A7RC | MSS   | ESCA |
| TCGA-WP-A9GB | MSS   | SARC |
| TCGA-X2-A95T | MSS   | SARC |

**Supplemental Table 3. Summary of inferred MSI diagnoses from whole genome sequencing**

| Cancer Type (TCGA Code) | Fraction of Cases (Count) |           |
|-------------------------|---------------------------|-----------|
|                         | MSS                       | MSI-H     |
| BLCA                    | 1 (24)                    | 0 (0)     |
| BRCA                    | 1 (98)                    | 0 (0)     |
| CESC                    | 1 (20)                    | 0 (0)     |
| COAD                    | 0.79 (37)                 | 0.21 (10) |
| ESCA                    | 1 (19)                    | 0 (0)     |
| GBM                     | 1 (61)                    | 0 (0)     |
| HNSC                    | 1 (50)                    | 0 (0)     |
| KICH                    | 1 (40)                    | 0 (0)     |
| KIRC                    | 1 (41)                    | 0 (0)     |
| KIRP                    | 1 (23)                    | 0 (0)     |
| LAML                    | 1 (46)                    | 0 (0)     |
| LGG                     | 1 (43)                    | 0 (0)     |
| LIHC                    | 1 (32)                    | 0 (0)     |
| LUAD                    | 1 (55)                    | 0 (0)     |
| LUSC                    | 1 (41)                    | 0 (0)     |
| OV                      | 1 (52)                    | 0 (0)     |
| READ                    | 1 (18)                    | 0 (0)     |
| SARC                    | 1 (41)                    | 0 (0)     |
| SKCM                    | 1 (42)                    | 0 (0)     |
| STAD                    | 0.87 (34)                 | 0.13 (5)  |
| THCA                    | 1 (40)                    | 0 (0)     |
| UCEC                    | 0.83 (24)                 | 0.17 (5)  |

Supplemental Table 4. Microsatellites most informative for MSI per cancer type (p value)

| Chromosome | Start Position | End Position | Gene(s) or distance to closest genes (dist) | UCEC     | STAD     | READ     | PRAD     | OV       | LUSC      | LUAD     | LGG | KIRC      | GBM      | ESCA     | DLBC      | COAD     | CESC     | BRCA     |          |
|------------|----------------|--------------|---------------------------------------------|----------|----------|----------|----------|----------|-----------|----------|-----|-----------|----------|----------|-----------|----------|----------|----------|----------|
| 15         | 65744267       | 65747043     | DPH8                                        | 1.51E-10 | 1.78E-22 | 0.020209 |          | 0.057143 | 0.070613  |          |     | 0.02027   |          |          |           | 5.27E-13 |          | 0.167646 |          |
| 20         | 3409165        | 3409913      | CEP350                                      | 1.33E-09 | 4.86E-09 | 1        | 1        | 1        | 1         | 1        | 1   | 0.0270327 | 1        | 1        | 0.4       | 1.34E-08 |          | 0.184968 |          |
| 17         | 12145683       | 12145699     | SIXN2                                       | 2.17E-17 | 1.11E-20 | 1        | 0.03013  |          | 1         | 1        | 1   | 0.034881  | 1        | 1        |           | 1.83E-11 | 0.000187 | 0.00086  |          |
| 16         | 107575782      | 107575819    | LAMB1                                       | 7.63E-06 | 0.002792 | 1        |          | 0.405542 | 0.0321647 | 1        |     | 1         | 1        | 0.071429 | 3.11E-05  | 1        | 0.086303 | 1        |          |
| 16         | 56718015       | 56718036     | MTX1                                        | 1.04E-08 | 3.34E-15 | 1        | 1        | 1        | 1         | 1        | 1   | 0.020833  | 1        | 1        |           | 2.86E-09 | 0.041096 | 0.36351  |          |
| 16         | 75674252       | 75674271     | KARS                                        | 7.94E-23 | 2.87E-36 | 1.03E-05 | 0.023621 | 0.146337 | 0.002021  | 0.049991 |     | 0.025889  | 0.035294 | 0.027027 |           | 1.57E-35 | 7.05E-05 | 0.007429 |          |
| 18         | 649879         | 649895       | TYMSOS                                      | 2.63E-36 | 1.03E-33 | 0.001053 | 0.000127 | 0.105188 | 0.002963  | 0.000358 |     | 0.024194  | 0.000566 | 0.030303 |           | 1.18E-38 | 0.000618 | 1.51E-07 |          |
| 2          | 128770731      | 128770743    | SAP30                                       | 2.48E-13 | 5.53E-22 | 1        | 1        | 1        | 1         | 1        | 1   | 1         | 1        | 1        |           | 1.12E-12 | 1        | 0.017313 |          |
| 1          | 472577864      | 472577919    | LRWD1                                       | 1.23E-09 | 4.16E-21 | 0.002302 | 1        | 1        | 1         | 1        | 1   | 0.059353  | 1        | 1        | 1.67E-05  | 1        | 2.41E-06 | 0.024008 |          |
| 1          | 52403174       | 52403187     | RARB3                                       | 3.5E-07  | 8.45E-16 | 0.166667 |          |          | 0.007143  |          |     |           |          | 0.025    |           | 0.002048 |          | 0.000705 |          |
| 1          | 92763091       | 92763128     | GLMN                                        | 7.19E-11 | 3.89E-26 | 0.000111 |          |          | 0.082651  | 0.078702 |     |           |          | 1        | 1         | 1.05263  | 1        | 1.37E-25 |          |
| 10         | 74690437       | 74690455     | OHIT3                                       | 1.15E-15 | 5.03E-13 | 0.003659 | 1        | 1        | 1         | 1        | 1   | 1         | 1        | 1        | 1         | 5.97E-14 | 1        | 0.169852 |          |
| 11         | 118885668      | 118885701    | CCDC84                                      | 3.57E-10 | 1.68E-16 | 9.19E-07 | 1        | 1        | 1         | 1        | 1   | 1         | 1        | 0.006803 | 0.016393  | 1        | 1.36E-17 | 1        | 0.048247 |
| 2          | 17940773       | 17940779     | MIRS48N,TTN-AS1                             | 1.47E-29 | 2.98E-33 | 0.000247 | 0.009346 | 0.089579 | 0.066834  | 1        |     |           |          | 0.077586 | 1         | 1        | 7.61E-14 | 1        | 0.003514 |
| 8          | 134125650      | 134125662    | TG                                          | 3.49E-17 | 1.1E-23  | 0.047619 | 0.008734 | 0.07519  | 0.025773  | 0.000474 |     | 0.021898  | 0.000229 | 0.000529 |           | 1.52E-06 | 0.000244 | 0.000126 |          |
| 1          | 444905992      | 444906020    | F20,NBPFS,PD4ADIP                           | 3.57E-11 | 0.00887  | 0.000802 |          |          |           | 1        | 1   | 1         | 1        | 1        | 1         | 2.7E-07  | 1        | 0.014315 |          |
| 1          | 154562637      | 154562636    | NDR                                         | 2.76E-18 | 1.1E-33  | 0.003759 |          |          |           | 0.017778 |     |           |          | 1        | 1         | 5.77E-09 | 0.044195 | 0.004985 |          |
| 1          | 220284112      | 220284124    | RNU5F1                                      | 6.42E-20 | 1.24E-25 | 0.01012  | 0.008547 | 1        | 1         | 1        | 1   | 1         | 1        | 0.134034 | 0.014706  | 1        | 1        | 0.000688 | 7.2E-05  |
| 1          | 46597496       | 46597508     | PIK3R3                                      | 1.83E-09 | 3.6E-17  | 0.065027 | 1        | 0.110342 | 1         | 1        | 1   | 1         | 1        | 1        | 1         | 8.7E-11  | 1        | 0.07598  |          |
| 1          | 94497662       | 94497673     | ABCA4                                       | 3.14E-06 | 6.91E-14 | 1        | 1        | 1        | 0.017241  | 1        | 1   | 1         | 1        | 1        | 1         | 6.13E-05 | 0.070779 | 0.012658 |          |
| 11         | 65273547       | 65273562     | MALAT1                                      | 3.49E-11 | 3.59E-16 | 1        | 1        | 1        | 0.092248  | 1        | 1   | 1         | 1        | 1        | 1         | 0.009015 | 1        | 1        |          |
| 17         | 36477914       | 36477929     | MRPL45                                      | 9.96E-14 | 2.21E-21 | 0.164048 | 1        | 1        | 1         | 1        | 1   | 1         | 1        | 0.003319 | 1         | 1        | 5.03E-09 | 0.001681 | 1        |
| 17         | 66038979       | 66038999     | KPNA2                                       | 2.17E-09 | 1.19E-29 | 1        | 1        | 1        | 1         | 1        | 1   | 0.075472  | 1        | 1        | 1         | 1        | 1.11E-16 | 0.004141 | 0.007284 |
| 16         | 78431193       | 78431204     | LINC01242(dist=280633),AC01(dist=1695497)   | 0.721021 | 4.76E-21 | 0.041667 | 1        | 1        | 1         | 1        | 1   | 0.286466  | 1        | 1        | 0.01681   | 1        | 1        | 1        | 1        |
| 19         | 14827076       | 14827089     | ZNF333                                      | 9.91E-18 | 6.49E-34 | 1        | 0.033317 | 1        | 0.02765   | 1        | 1   | 1         | 1        | 1        | 0.015625  | 1        | 1        | 1        | 1        |
| 2          | 152424933      | 152424962    | NEB                                         | 1.15E-14 | 6.96E-17 | 1        | 0.010417 | 1        | 0.013043  | 1        | 1   | 0.015625  | 0.086915 | 0.028986 | 0.263158  | 1.75E-26 | 0.094622 | 0.176705 |          |
| 2          | 33500751       | 33500763     | LTP1                                        | 8.49E-06 | 3.68E-09 | 0.079699 | 1        | 1        | 0.020161  | 1        | 1   | 1         | 1        | 1        | 0.054795  | 1        | 1        | 0.004416 | 0.002837 |
| 2          | 70456452       | 70456465     | TIAL                                        | 9.68E-26 | 2.25E-28 | 0.017544 | 1        | 0.066116 | 1         | 0.013889 | 1   | 0.011628  | 0.114551 | 1        | 1         | 8.79E-27 | 1        | 1.32E-07 |          |
| 22         | 29879265       | 29879302     | NEFH                                        | 0.109645 | 3.75E-08 | 1        | 0.004975 | 1        | 0.015564  | 1        | 1   | 1         | 1        | 1        | 1         | 0.015883 | 1        | 1        |          |
| 3          | 172052897      | 172052934    | FNDX3B                                      | 2.9E-28  | 4.2E-36  | 0.000846 | 0.004566 | 0.060811 |           |          |     | 0.007143  | 1        | 1        | 1         | 9.06E-17 | 1        | 0.01286  |          |
| 3          | 36542637       | 36542646     | NDR                                         | 1.94E-28 | 8.39E-39 | 0.003759 |          | 0.1264   | 0.000845  | 1        | 1   | 0.00181   | 1        | 1        | 1         | 1        | 0.000974 | 0.000974 |          |
| 9          | 30689085       | 30689104     | LINC01242(dist=280633),AC01(dist=1695497)   | 1.47E-18 | 3.86E-34 | 0.000611 |          | 0.041667 | 1         | 1        | 1   | 1         | 1        | 0.041771 | 1         | 1        | 1        | 1        |          |
| 1          | 215914883      | 215914896    | USHA                                        | 5.51E-08 | 1.85E-16 | 0.023256 | 1        | 1        | 0.005225  | 0.03661  | 1   | 0.014286  | 0.005746 | 1        | 1         | 5.2E-07  | 1        | 1.96E-05 |          |
| 1          | 225707271      | 225707295    | ENAH                                        | 8.51E-25 | 7.88E-21 | 0.003507 | 1        | 1        | 0.029412  | 1        | 1   | 1         | 1        | 1        | 1         | 3E-18    | 0.022002 | 0.00139  |          |
| 10         | 99198507       | 99198528     | EXOC1                                       | 5.94E-07 | 9.01E-17 | 0.021005 | 1        | 1        | 1         | 1        | 1   | 0.019481  | 1        | 1        | 1         | 3.82E-12 | 0.057681 | 0.095574 |          |
| 11         | 9878320        | 9878353      | LOC101928008                                | 0.004335 | 2.01E-06 | 1        | 1        | 1        | 1         | 1        | 1   | 1         | 1        | 1        | 1         | 0.255814 | 1        | 0.113112 |          |
| 12         | 51053873       | 51053889     | DIP2B                                       | 1.34E-12 | 6.99E-19 | 0.005848 | 1        | 1        | 0.08899   | 0.035209 | 1   | 1         | 1        | 1        | 1         | 1        | 1        | 0.06405  |          |
| 19         | 5501348        | 5501355      | PIRBP                                       | 1.04E-08 | 8.29E-38 | 0.12704  | 1        | 0.429063 | 0.033981  | 0.058973 | 1   | 1         | 0.028369 | 1        | 1         | 1        | 1        | 0.014606 |          |
| 19         | 9558905        | 9558924      | LINC01891                                   | 3.37E-23 | 2.42E-24 | 0.065789 | 0.008771 | 1        | 0.058428  | 1        | 1   | 0.058428  | 1        | 1        | 1         | 1        | 1        | 1        |          |
| 20         | 30818497       | 30818514     | POU1T1                                      | 5.72E-14 | 7.99E-24 | 1        | 0.000129 | 1        | 1         | 1        | 1   | 0.053684  | 1        | 1        | 1         | 0.015789 | 0.001403 | 1        |          |
| 20         | 31954819       | 31954834     | CKSRAP1                                     | 3.77E-24 | 1.66E-24 | 0.076923 | 0.015968 | 1        | 1         | 1        | 1   | 1         | 1        | 1        | 0.589E-06 | 0.02     | 1        | 2.94E-26 |          |
| 21         | 34907636       | 34907654     | GART                                        | 2.36E-21 | 5.55E-29 | 0.003279 | 0.012097 | 1        | 0.03913   | 1        | 1   | 0.019231  | 1        | 1        | 0.021739  | 1        | 1        | 9.36E-19 |          |
| 3          | 37360696       | 37360708     | GOLGA4                                      | 1.03E-16 | 2.47E-19 | 0.004525 | 1        | 1        | 1         | 1        | 1   | 1         | 1        | 0.02439  | 1         | 1        | 0.012146 | 0.010863 |          |
| 6          | 36019285       | 36019302     | CGorf136                                    | 3.76E-07 | 1.86E-26 | 1        | 1        | 1        | 0.051054  | 1        | 1   | 0.078947  | 1        | 1        | 1         | 1        | 0.008422 | 1        |          |
| 10         | 100843869      | 100843913    | SATG3                                       | 1.08E-12 | 6.35E-25 | 1        | 1        | 1        | 1         | 1        | 1   | 0.021739  | 0.037207 | 1        | 1         | 1        | 1        | 6.79E-05 |          |
| 8          | 13307406       | 13307408     | DLG2                                        | 3.42E-07 | 1.33E-20 | 1        | 0.249265 | 1        | 1         | 1        | 1   | 1         | 1        | 1        | 1         | 2.43E-08 | 1        | 0.116097 |          |
| 1          | 181714466      | 181714481    | CACNA1E                                     | 3.7E-08  | 1.19E-18 | 1        | 0.071942 | 0.004906 | 1         | 1        | 1   | 1         | 1        | 1        | 1         | 0.167048 | 1        | 0.003077 |          |
| 1          | 237060945      | 237060970    | MTR                                         | 1.8E-15  | 4.17E-21 | 0.002211 | 1        | 1        | 0.000471  | 1        | 1   | 1         | 1        | 0.014925 | 1         | 1        | 7.45E-19 | 1        |          |
| 1          | 3697538        | 3697576      | LRR4C2                                      | 0.003244 | 1.41E-09 | 1        | 1        | 1        | 1         | 1        | 1   | 1         | 1        | 0.114656 | 0.027027  | 0.142857 | 0.004926 | 0.021505 |          |
| 1          | 67292737       | 67292748     | WDR78                                       | 0.005608 | 6.19E-10 | 1        | 1        | 1        | 0.022222  | 1        | 1   | 1         | 1        | 1        | 1         | 3.32E-09 | 1        | 0.086915 |          |
| 10         | 116196143      | 116196156    | ABLIM1                                      | 8.4E-19  | 8.05E-14 | 0.047619 | 1        | 1        | 0.042556  | 1        | 1   | 1         | 1        | 1        | 0.000784  | 1        | 1        | 9.25E-10 |          |
| 12         | 4645161        | 4645173      | MRP1                                        | 6.4E-23  | 3.4E-38  | 0.12704  | 0.008696 | 0.065888 | 0.033981  | 0.015873 | 1   | 0.025862  | 1        | 1        | 1         | 1        | 1        | 6.41E-06 |          |
| 13         | 39594136       | 39594152     | GENM3                                       | 1.79E-15 | 4.66E-24 | 0.008737 | 0.017737 | 1        | 0.22948   | 0.052174 | 1   | 0.050505  | 0.12069  | 0.017857 | 1         | 1        | 1        | 1        |          |
| 14         | 57101560       | 57101576     | TMEM260                                     | 2.55E-20 | 1.93E-24 | 0.006721 | 0.008511 | 1        | 1         | 0.032191 | 1   | 0.103824  | 0.133746 | 1        | 1         | 1        | 1        | 9.96E-11 |          |
| 15         | 52561891       | 52561907     | MYO5C                                       | 1.79E-24 | 1.36E-18 | 0.093702 | 1        | 0.093906 | 1         | 0.001449 | 1   | 1         | 1        | 1        | 0.000512  | 1        | 1        | 1        |          |
| 15         | 65739356       | 65739384     | DPH8                                        | 2.53E-13 | 1.81E-16 | 0.087719 | 0.01956  | 1        | 1         | 1        | 1   | 1         | 1        | 1        | 1         | 7.8E-12  | 1        | 0.117071 |          |
| 15         | 94841981       | 94842010     | MYO27C1                                     | 0.002721 | 3.66E-11 | 1        | 1        | 1        | 1         | 1        | 1   | 1         | 1        | 0.012177 | 1         | 1        | 1        | 0.028714 |          |
| 16         | 15159027       | 15159039     | PDXDC1,RRN3                                 | 2.71E-14 | 5.76E-25 | 0.000398 | 1        | 0.114551 | 1         | 1        | 1   | 1         | 1        | 0.024691 | 1         | 1        | 1        | 1.07E-28 |          |
| 17         | 15022787       | 15022793     | WRP8                                        | 5.94E-17 | 4.6E-11  | 0.008865 | 0.008368 | 1        | 0.064499  | 1        | 1   | 0.017857  | 1        | 1        | 1         | 0.003629 | 0.000618 | 0.005055 |          |
| 17         | 37155781       | 37155795     | FAM41                                       | 1        |          |          |          |          |           |          |     |           |          |          |           |          |          |          |          |

|    |           |           |                                         |  |          |          |          |          |          |          |          |          |          |          |           |          |           |          |          |          |          |          |          |          |   |
|----|-----------|-----------|-----------------------------------------|--|----------|----------|----------|----------|----------|----------|----------|----------|----------|----------|-----------|----------|-----------|----------|----------|----------|----------|----------|----------|----------|---|
| 20 | 52675132  | 52675153  | BCAS1                                   |  | 5.8E-08  | 5.4E-15  | 0.049383 | 1        | 1        | 1        | 1        | 1        | 1        | 1        | 1         | 1        | 1         | 1        | 1        | 1.56E-12 | 1        | 0.198933 | 1        |          |   |
| 3  | 160134195 | 160134221 | SMC4                                    |  | 4.18E-06 | 7.1E-27  | 0.0625   | 0.01173  | 0.0625   | 0.033333 | 0.019737 | 1        | 0.035714 | 0.013158 | 1         | 1        | 1         | 1        | 1        | 1        | 2.05E-19 | 1        | 1        | 1        |   |
| 3  | 180680880 | 180680908 | FXR1                                    |  | 6.35E-10 | 6.06E-08 | 0.181422 | 1        | 1        | 1        | 1        | 1        | 1        | 1        | 1         | 1        | 1         | 1        | 1        | 1        | 2.66E-06 | 1        | 1        | 1        |   |
| 3  | 194159705 | 194159731 | NR1L3A3                                 |  | 1.34E-05 | 3.93E-05 | 0.019828 | 0.06944  | 0.026549 | 1        | 1        | 1        | 0.015323 | 0.02994  | 1         | 1        | 1         | 1        | 1        | 1        | 3.02E-09 | 0.040541 | 0.000447 | 1        |   |
| 3  | 194982211 | 194982513 | KCNH2                                   |  | 6.97E-17 | 2.5E-12  | 0.000925 | 0.009217 | 1        | 1        | 1        | 0.011944 | 0.004523 | 1        | 1         | 1        | 1         | 1        | 1        | 1        | 6.74E-13 | 0.001368 | 1        | 1        |   |
| 3  | 33725824  | 33725828  | CLASP2                                  |  | 8.63E-20 | 3.5E-26  | 0.097561 | 0.009479 | 1        | 1        | 0.03     | 0.000987 | 1        | 0.034041 | 0.016129  | 0.238095 | 0.936E-13 | 0.021505 | 0.000278 | 1        | 1        | 1        | 1        | 1        |   |
| 4  | 128621144 | 128621158 | INTU                                    |  | 3.6E-18  | 2.7E-25  | 1        | 1        | 1        | 0.023609 | 1        | 1        | 1        | 3.4E-06  | 0.015625  | 1        | 1         | 1        | 1        | 1        | 7.95E-19 | 1        | 0.009935 | 1        |   |
| 4  | 16362275  | 16362287  | TAP1-AS1(dist=102465),LDB2(dist=140878) |  | 1.36E-12 | 8.03E-19 | 0.151636 | 0.166298 | 0.035358 | 0.074042 | 1        | 1        | 0.00234  | 1        | 0.368421  | 4.27E-11 | 1         | 1        | 1        | 1        | 4.27E-11 | 1        | 0.11845  | 1        |   |
| 4  | 25315637  | 25315653  | ZCCHC4                                  |  | 7.89E-25 | 7.52E-28 | 0.000594 | 0.040646 | 1        | 0.022141 | 1        | 1        | 0.001832 | 0.001395 | 1         | 0.066667 | 2.47E-19  | 1        | 1        | 1        | 8.07E-08 | 1        | 0.13533  | 1        |   |
| 4  | 7881527   | 78815284  | MRF1L2                                  |  | 2.2E-21  | 3.45E-47 | 0.041667 | 1        | 1        | 1        | 0.043592 | 1        | 0.060241 | 0.017544 | 1         | 1        | 1         | 1        | 1        | 1        | 2E-34    | 1        | 0.164331 | 1        |   |
| 4  | 31433975  | 31433975  | DROSHA                                  |  | 1.14E-04 | 2.93E-03 | 0.019828 | 0.009132 | 0.081301 | 0.010309 | 1        | 1        | 1        | 0.045138 | 1         | 1        | 1         | 1        | 1        | 1        | 3.35E-10 | 1        | 0.065574 | 1        |   |
| 6  | 10926517  | 10926528  | SYT2L                                   |  | 2.36E-17 | 6.47E-36 | 0.08     | 1        | 1        | 0.025723 | 0.084067 | 1        | 1        | 3.3E-05  | 0.035088  | 1        | 1         | 1        | 1        | 1        | 3.51E-08 | 0.007103 | 0.036238 | 1        |   |
| 6  | 15651642  | 15651652  | DTNBP1                                  |  | 1.64E-32 | 3.1E-30  | 0.001329 | 1        | 1        | 0.064891 | 1        | 0.00813  | 1        | 0.015152 | 1         | 1        | 1         | 1        | 1        | 1        | 4.1E-23  | 0.014129 | 1.11E-07 | 1        |   |
| 7  | 100319680 | 100319696 | EPO                                     |  | 5.87E-48 | 1.51E-23 | 0.057545 | 1        | 1        | 0.000419 | 0.031518 | 1        | 0.012346 | 1        | 0.056729  | 1        | 1         | 1        | 1        | 1        | 7.69E-18 | 4.51E-06 | 0.017851 | 1        |   |
| 7  | 86522420  | 86522432  | KIAA1324L                               |  | 8.04E-09 | 9.68E-23 | 0.00439  | 1        | 0.098704 | 0.02439  | 0.022831 | 1        | 0.022989 | 0.93E-08 | 0.166667  | 0.296296 | 2.63E-14  | 0.034483 | 0.021585 | 1        | 1        | 1        | 1        | 1        |   |
| 7  | 95818864  | 95818897  | SLC25A13                                |  | 3.2E-12  | 4.26E-11 | 0.007541 | 1        | 1        | 0.004592 | 1        | 1        | 0.013889 | 1        | 1         | 1        | 1         | 1        | 1        | 1        | 8.07E-08 | 1        | 0.211483 | 1        |   |
| 8  | 63948170  | 63948202  | GGH                                     |  | 6.69E-12 | 1.38E-18 | 0.268571 | 0.03661  | 1        | 1        | 1        | 1        | 1        | 1        | 0.052632  | 0.2      | 3.24E-21  | 1        | 1        | 1        | 3.24E-21 | 1        | 0.00031  | 1        |   |
| 8  | 102730807 | 102730712 | STK16                                   |  | 1.59E-30 | 4.73E-30 | 0.000515 | 1        | 1        | 0.040541 | 0.040979 | 1        | 1        | 6.84E-05 | 0.018519  | 1        | 1         | 1        | 1        | 1        | 1.35E-19 | 1        | 0.000551 | 1        |   |
| 9  | 131743701 | 131743715 | NR1H8                                   |  | 4.55E-17 | 7.2E-39  | 0.039999 | 0.009091 | 1        | 0.043689 | 1        | 1        | 1        | 9.28E-05 | 1         | 1        | 1         | 1        | 1        | 1        | 3.36E-16 | 0.024843 | 5.67E-07 | 1        |   |
| 9  | 33062183  | 33062195  | SMU1                                    |  | 4.57E-08 | 8.69E-17 | 1        | 1        | 0.042855 | 0.008299 | 0.125196 | 1        | 0.440717 | 0.020408 | 0.066667  | 4.51E-06 | 0.06014   | 0.001678 | 1        | 1        | 1        | 1        | 1        | 1        |   |
| 9  | 80343587  | 80343612  | GNAX                                    |  | 4.29E-14 | 4.97E-27 | 0.014401 | 0.009132 | 1        | 1        | 0.001091 | 1        | 0.188619 | 0.002558 | 0.2       | 1.52E-19 | 0.091783  | 0.009664 | 1        | 1        | 1        | 1        | 1        | 1        |   |
| 9  | 90343456  | 90343467  | CTSL                                    |  | 9.21E-10 | 2.03E-09 | 1        | 1        | 1        | 1        | 1        | 1        | 1        | 1        | 1         | 0.000123 | 1         | 1        | 1        | 1        | 0.000123 | 1        | 0.001926 | 1        |   |
| 1  | 109839063 | 109839079 | MYBP3L                                  |  | 3.34E-08 | 8.38E-08 | 1        | 1        | 1        | 1        | 1        | 1        | 1        | 1        | 1         | 1        | 0.000642  | 1        | 1        | 1        | 1        | 0.000642 | 1        | 0.105348 | 1 |
| 1  | 12398426  | 12398437  | VPF13D                                  |  | 0.000903 | 1.16E-09 | 1        | 1        | 1        | 1        | 1        | 1        | 1        | 0.003342 | 0.016393  | 1        | 1         | 1        | 1        | 1        | 1        | 7.97E-07 | 1        | 0.002338 | 1 |
| 1  | 150793125 | 150793138 | ARMT                                    |  | 2.98E-09 | 2.38E-26 | 0.002885 | 0.010811 | 1        | 1        | 0.000478 | 1        | 1        | 1        | 1         | 1        | 1         | 1        | 1        | 1        | 1.56E-19 | 1        | 0.001173 | 1        |   |
| 1  | 16036824  | 16036848  | SRFA                                    |  | 1.30E-07 | 3.06E-13 | 0.0712   | 1        | 1        | 0.043478 | 1        | 1        | 0.016529 | 0.050824 | 1         | 1        | 1         | 1        | 1        | 1        | 1        | 1        | 1        | 1        |   |
| 1  | 222904869 | 222904881 | BRX3                                    |  | 6.01E-27 | 5.06E-33 | 4.59E-06 | 0.008621 | 1        | 1        | 6.75E-06 | 1        | 1        | 0.037733 | 1         | 1        | 1         | 1        | 1        | 1        | 1        | 4.84E-29 | 0.157939 | 1        |   |
| 1  | 57349140  | 57349151  | C8A                                     |  | 5.13E-10 | 2.64E-14 | 0.00363  | 1        | 1        | 0.040201 | 1        | 0.004016 | 1        | 1        | 0.263158  | 1.86E-09 | 1         | 1        | 1        | 1        | 1        | 0.032806 | 1        | 1        |   |
| 1  | 67154730  | 67154748  | SGIP1                                   |  | 1.73E-11 | 3.2E-23  | 0.146154 | 0.001326 | 0.309696 | 1        | 0.048673 | 0.170399 | 0.001823 | 1        | 0.293E-10 | 0.020161 | 0.031043  | 1        | 1        | 1        | 1        | 1        | 1        | 1        |   |
| 1  | 84956161  | 84956173  | RPF1                                    |  | 1.68E-21 | 7.07E-31 | 0.003279 | 0.000141 | 1        | 1        | 0.080281 | 1        | 0.022556 | 0.00136  | 0.038988  | 0.464286 | 9.52E-19  | 1        | 1        | 1        | 1        | 1        | 0.00168  | 1        |   |
| 10 | 112044559 | 112044572 | MXI1                                    |  | 1.41E-20 | 8.85E-13 | 0.008865 | 0.008929 | 0.125196 | 1        | 0.012552 | 1        | 1        | 0.096039 | 0.055556  | 1        | 0.202E-05 | 1        | 1        | 1        | 1        | 0.078431 | 1        | 1        |   |
| 10 | 7576885   | 7576896   | MFK2G                                   |  | 7.32E-06 | 7.75E-10 | 0.019285 | 0.005556 | 1        | 0.038462 | 0.010989 | 1        | 0.115013 | 1        | 1         | 1        | 1         | 1        | 1        | 1        | 4.23E-05 | 1        | 0.118717 | 1        |   |
| 11 | 11862015  | 11862017  | DDX4                                    |  | 3.08E-11 | 3.08E-11 | 0.022713 | 1        | 1        | 0.025478 | 1        | 0.032787 | 1        | 0.000546 | 1         | 1        | 1         | 1        | 1        | 1        | 1        | 1        | 1        | 1        |   |
| 11 | 46703002  | 46703014  | ARRGAP1                                 |  | 4.7E-12  | 1.65E-34 | 1        | 1        | 0.000141 | 1        | 1        | 1        | 1        | 1        | 1         | 1        | 1         | 1        | 1        | 1        | 7.03E-15 | 1        | 0.00377  | 1        |   |
| 11 | 73429947  | 73429972  | RAB6A                                   |  | 1.32E-10 | 1.02E-20 | 0.059701 | 1        | 1        | 0.039773 | 1        | 1        | 1        | 1        | 0.028986  | 1        | 1         | 1        | 1        | 1        | 1        | 7.32E-11 | 1        | 0.00026  | 1 |
| 12 | 90005161  | 90005173  | ATP2B1                                  |  | 2.31E-20 | 5.49E-26 | 0.004    | 1        | 1        | 0.007067 | 0.000493 | 1        | 0.034333 | 0.000739 | 0.038988  | 1        | 1         | 1        | 1        | 1        | 5.13E-16 | 1        | 0.007961 | 1        |   |
| 14 | 76349004  | 76349024  | TLL5                                    |  | 3.23E-12 | 2.62E-07 | 1        | 1        | 1        | 1        | 1        | 1        | 1        | 1        | 1         | 1        | 0.003186  | 0.028169 | 1        | 1        | 1        | 1        | 1        | 1        |   |
| 15 | 30010328  | 30010349  | TFPI                                    |  | 3.41E-24 | 7.29E-32 | 6.17E-05 | 1        | 1        | 0.07374  | 1        | 0.021898 | 1        | 0.024691 | 1         | 1        | 1         | 1        | 1        | 1        | 1        | 1.78E-20 | 1        | 0.183042 | 1 |
| 15 | 36910962  | 36910982  | C15orf41                                |  | 1.84E-17 | 1.96E-47 | 0.010881 | 1        | 1        | 0.201255 | 1        | 1        | 1        | 1        | 1         | 1        | 1         | 1        | 1        | 1        | 1.98E-07 | 1        | 1        | 1        |   |
| 15 | 45947111  | 45947113  | PYH14D1                                 |  | 4.35E-16 | 1.08E-43 | 1        | 1        | 1        | 1        | 1        | 1        | 0.027314 | 0.041667 | 1         | 1        | 1         | 1        | 1        | 1        | 4.96E-13 | 1        | 0.001668 | 1        |   |
| 2  | 102785158 | 102785171 | ILR1                                    |  | 1.1E-13  | 2.48E-07 | 0.006974 | 0.075242 | 1        | 1        | 0.009479 | 0.052623 | 0.038095 | 1        | 0.296296  | 0.42E-22 | 1         | 1        | 1        | 1        | 0.005512 | 1        | 1        | 1        |   |
| 2  | 102959146 | 102959427 | ILR1L1                                  |  | 7.43E-09 | 3.03E-22 | 1        | 1        | 0.080645 | 1        | 1        | 1        | 1        | 1        | 1         | 1        | 1         | 1        | 1        | 1        | 2E-12    | 0.030769 | 0.000138 | 1        |   |
| 2  | 166018764 | 166018775 | SCN3A                                   |  | 0.094209 | 0.000247 | 1        | 1        | 1        | 1        | 1        | 1        | 1        | 1        | 1         | 1        | 0.235294  | 0.000605 | 1        | 1        | 1        | 1        | 1        | 1        |   |
| 2  | 179595571 | 179595589 | ITN                                     |  | 0.000139 | 3.78E-17 | 0.000111 | 1        | 1        | 0.029126 | 0.097194 | 0.013889 | 1        | 0.041203 | 1         | 1        | 0.000827  | 1        | 1        | 1        | 1        | 1        | 1        | 1        |   |
| 2  | 183960133 | 183960155 | DUSP19                                  |  | 2.11E-10 | 3.93E-23 | 0.08951  | 0.018735 | 0.132264 | 0.066332 | 0.001796 | 0.004663 | 0.020548 | 0.042424 | 1         | 1        | 0.273E-11 | 1        | 1        | 1        | 1        | 1        | 1        | 1        |   |
| 2  | 188225486 | 188225497 | CALCR1                                  |  | 2.58E-07 | 3.28E-12 | 1        | 1        | 0.081967 | 0.027027 | 1        | 1        | 1        | 1        | 1         | 1        | 1         | 1        | 1        | 1        | 1.4E-08  | 1        | 0.113615 | 1        |   |
| 21 | 34117067  | 34117080  | SNRPB                                   |  | 4.11E-22 | 3.93E-38 | 0.036364 | 1        | 1        | 0.039896 | 0.000604 | 1        | 0.027273 | 1        | 0.016949  | 1        | 1         | 1        | 1        | 1        | 6.56E-21 | 2.71E-05 | 0.088267 | 1        |   |
| 21 | 34635068  | 34635085  | FNBR2                                   |  | 8.15E-03 | 1.04E-52 | 1        | 1        | 0.080773 | 0.11059  | 1        | 0.037513 | 1        | 1        | 0.001531  | 1        | 1         | 1        | 1        | 1        | 0.001531 | 1        | 0.001595 | 1        |   |
| 21 | 47821449  | 47821460  | PCNT                                    |  | 0.001334 | 9.86E-11 | 1        | 0.013605 | 0.019417 | 0.031746 | 1        | 1        | 0.014225 | 1        | 1         | 1        | 1         | 1        | 1        | 1        | 7.15E-08 | 1        | 0.017391 | 1        |   |
| 22 | 39482241  | 39482254  | APOBEC3G                                |  | 4.41E-11 | 3.94E-15 | 0.03693  | 1        | 1        | 1        | 1        | 1        | 1        | 1        | 1         | 1        | 1         | 1        | 1        | 1        | 1        | 3.78E-08 | 1        | 0.004318 | 1 |
| 3  | 179481971 | 179482004 | USP13                                   |  | 2.2E-07  | 0.160421 | 0.01063  | 1        | 1        | 1        | 1        | 1        | 1        | 1        | 1         | 0.087719 | 0.000418  | 0.08     | 0.000286 | 1        | 1        | 1        | 1        | 1        |   |
| 3  | 33877500  | 33877534  | PDCD6IP                                 |  | 2.39E-11 | 2.46E-09 | 1        | 1        | 1        | 1        | 1        | 1        | 1        | 1        | 1         | 1        | 1         | 1        | 1        | 1        | 6.45E-07 | 1        | 0.001597 | 1        |   |
| 3  | 9730522   | 97305243  | MTMR14                                  |  | 8.51E-10 | 7.13E-11 | 1        | 1        | 1        | 0.004695 | 1        | 1        | 1        | 1        | 1         | 1        | 1         | 1        | 1        | 1        | 1        | 1        | 1        | 1        |   |
| 4  | 4924869   | 4924866   | ITGA7                                   |  | 3.26E-16 | 1.06E-23 | 0.001095 | 0.069093 | 0.146556 | 0.000274 | 0.079507 | 1        | 0.056236 | 0.157325 | 1         | 1        | 1         | 1        | 1        | 1        | 3.37E-05 | 0.001947 | 4.75E-02 | 1        |   |
| 4  | 5218976   | 5218978   | ITGA7                                   |  | 1.59E-09 | 4.31E-24 | 0.030209 | 0.06408  | 0.000268 | 1        | 1        | 1        | 0.174754 | 1        | 1         | 1        |           |          |          |          |          |          |          |          |   |



|    |           |           |                                       |          |          |          |           |          |          |          |          |          |          |          |          |           |          |          |          |
|----|-----------|-----------|---------------------------------------|----------|----------|----------|-----------|----------|----------|----------|----------|----------|----------|----------|----------|-----------|----------|----------|----------|
| 9  | 132838831 | 132838842 | GPR107                                | 4.86E-07 | 2.34E-12 | 1        | 1         | 1        | 1        | 1        | 1        | 1        | 0.028986 | 1        | 1        | 1.79E05   | 1        | 0.085293 |          |
| X  | 101409243 | 101409271 | BEXS                                  | 6.01E-23 | 1.73E-11 | 0.000161 | 0.067227  | 1        | 0.015326 | 1        | 1        | 1        | 0.028571 | 1        | 1        | 5.26E17   | 0.081186 | 0.022574 |          |
| X  | 111090289 | 111090311 | RFRCS                                 | 3.99E-09 | 2.69E-12 | 1        | 0.142665  | 1        | 0.016736 | 1        | 1        | 1        | 0.055556 | 1        | 1        | 2.32E05   | 0.012346 | 0.036645 |          |
| X  | 117348212 | 117348233 | WDRK4                                 | 3.12E-08 | 1.95E-17 | 1        | 0.005     | 1        | 0.044242 | 1        | 1        | 1        | 0.021277 | 1        | 1        | 0.037377  | 0.037377 | 0.001616 |          |
| X  | 15607586  | 15607598  | ACE2                                  | 7.63E-15 | 2.35E-15 | 0.076169 | 0.027523  | 0.052109 | 1        | 1        | 1        | 1        | 1.56E-06 | 0.037057 | 1        | 1         | 2.12E-14 | 0.003455 |          |
| X  | 153955601 | 153955614 | RAB13                                 | 9.95E-14 | 5.12E-18 | 0.074627 | 1         | 0.000807 | 1        | 1        | 1        | 1        | 0.000323 | 1        | 1        | 5.93E-10  | 1        | 1        |          |
| 1  | 183176970 | 183176986 | LAMC2                                 | 1.98E-15 | 1.88E-16 | 0.044878 | 0.039502  | 1        | 0.235644 | 1        | 1        | 1        | 0.090909 | 1        | 1        | 9.12E-15  | 1        | 0.056804 |          |
| 1  | 230798864 | 230798876 | COG2                                  | 2.45E-21 | 2.32E-12 | 0.001442 | 1         | 0.040201 | 0.016461 | 1        | 1        | 1        | 0.045449 | 0.058065 | 1        | 1         | 3.75E-17 | 0.000084 |          |
| 1  | 235316088 | 235316100 | RBM8A                                 | 9.59E-08 | 4E-07    | 1        | 1         | 0.054598 | 1        | 1        | 1        | 1        | 0.033333 | 1        | 1        | 2.74E09   | 1        | 0.059673 |          |
| 1  | 236737874 | 236737886 | HEATR1                                | 1.51E-13 | 2.56E-15 | 0.153627 | 0.0625    | 0.000433 | 0.045633 | 0.021978 | 0.071429 | 1        | 1        | 1        | 1        | 1.65E-08  | 1        | 0.007703 |          |
| 10 | 102293143 | 102293157 | HNR1A3,SEMAMG                         | 0.002728 | 3.06E-17 | 0.073708 | 0.068164  | 0.034483 | 1        | 1        | 1        | 1        | 1        | 0.028751 | 1        | 1         | 5.30E-17 | 1        |          |
| 10 | 114297930 | 114297954 | VTG1A                                 | 3.02E-06 | 4.6E-08  | 1        | 1         | 1        | 1        | 1        | 1        | 1        | 1        | 0.028751 | 1        | 1         | 5.74E09  | 0.033333 |          |
| 10 | 32575773  | 32575785  | EPLC1                                 | 8.52E-15 | 2.71E-28 | 1        | 0.081633  | 0.035503 | 1        | 1        | 1        | 1        | 0.027273 | 0.045113 | 0.028571 | 1         | 0.20721  | 0.020022 |          |
| 10 | 69716602  | 69716614  | HERC4                                 | 6.84E-16 | 8.6E-24  | 0.158163 | 1         | 1        | 1        | 0.012448 | 1        | 1        | 0.149736 | 0.033898 | 0.384615 | 4.81E-15  | 0.021978 | 0.000482 |          |
| 10 | 7747034   | 7747047   | ITH2                                  | 2.4E-13  | 2.76E-12 | 0.006452 | 1         | 1        | 0.07     | 1        | 1        | 1        | 0.016807 | 0.016807 | 0.023811 | 1         | 1        | 6.04E-08 |          |
| 11 | 75316787  | 75316823  | HPC2                                  | 2.19E-09 | 1.14E-09 | 1        | 1         | 1        | 1        | 0.016807 | 0.061856 | 0.023811 | 1        | 1        | 1        | 9.02E09   | 1        | 1        |          |
| 12 | 104461711 | 104461723 | MARF1                                 | 3.75E-23 | 1.67E-29 | 0.032651 | 1         | 0.030303 | 0.042662 | 0.133181 | 0.96E-08 | 0.019231 | 1        | 1        | 1        | 3.32E-16  | 0.039216 | 9.39E-06 |          |
| 12 | 107398862 | 107398876 | CRY1                                  | 9.28E-22 | 3.65E-26 | 1        | 0.003368  | 0.018868 | 0.058125 | 0.03947  | 0.000108 | 1        | 1        | 1        | 1        | 7.39E-08  | 1        | 4.04E-08 |          |
| 12 | 40716097  | 40716093  | LRM2                                  | 2.69E-20 | 5.69E-17 | 0.009307 | 0.070204  | 1        | 1        | 1        | 1        | 1        | 0.152585 | 1        | 1        | 5.63E-15  | 0.118688 | 0.002671 |          |
| 13 | 113527868 | 113527879 | PTF11A                                | 2.46E-10 | 2.44E-16 | 0.005571 | 0.051095  | 1        | 0.021739 | 1        | 1        | 1        | 1        | 1        | 1        | 8.22E-16  | 0.000529 | 8.33E-05 |          |
| 13 | 28609813  | 28609824  | FLT3                                  | 0.000154 | 7.83E-11 | 1        | 1         | 1        | 1        | 1        | 1        | 1        | 1        | 1        | 1        | 1.64E-08  | 1        | 0.020528 |          |
| 14 | 35899480  | 35899493  | NFKB1A(dist=25520),INSM2(dist=103755) | 2.41E-23 | 1.96E-20 | 0.073915 | 1         | 0.003412 | 0.044242 | 1        | 1        | 0.021739 | 1        | 1        | 4.39E-25 | 0.021739  | 0.000341 |          |          |
| 14 | 73079138  | 73079150  | RGSD(dist=45900),DPF3(dist=6854)      | 9.28E-07 | 1.37E-23 | 0.000116 | 0.044248  | 0.038213 | 0.000152 | 0.00578  | 1        | 1        | 1        | 0.006348 | 1        | 1         | 0.010989 | 1        |          |
| 14 | 91467510  | 91467532  | RSP6KA5                               | 3.2E-05  | 3.73E-09 | 1        | 1         | 1        | 1        | 1        | 1        | 1        | 1        | 1        | 1        | 7.77E-08  | 0.036585 | 0.086207 |          |
| 15 | 75099933  | 75099947  | SNUP1                                 | 2.77E-12 | 1.56E-13 | 1        | 1         | 1        | 1        | 1        | 1        | 0.015267 | 0.015748 | 0.333333 | 1        | 1         | 5.48E-14 | 0.003257 |          |
| 15 | 30757313  | 30757328  | USP1A                                 | 1.32E-08 | 1.16E-11 | 1        | 1         | 1        | 1        | 1        | 1        | 1        | 1        | 0.026786 | 1        | 1         | 2.03E-11 | 0.000174 |          |
| 17 | 17931884  | 17931902  | ATPAF2                                | 6.66E-07 | 4.13E-11 | 0.042254 | 1         | 1        | 1        | 1        | 1        | 1        | 1        | 1        | 1        | 0.020833  | 0.290323 | 0.080817 |          |
| 17 | 33445416  | 33445427  | RADS113-RFFL                          | 1.29E-05 | 4.09E-14 | 0.026549 | 1         | 1        | 1        | 1        | 1        | 1        | 1        | 0.03125  | 1        | 1         | 0.001739 | 1        |          |
| 18 | 24039893  | 24039904  | KCTD1                                 | 3.62E-08 | 8.02E-25 | 1        | 1         | 1        | 1        | 1        | 1        | 1        | 0.05036  | 1        | 1        | 0.000983  | 1        | 1        |          |
| 18 | 77377174  | 7737726   | TNXL4A                                | 4E-12    | 3.09E-19 | 0.009661 | 1         | 0.00023  | 1        | 0.032609 | 0.081395 | 1        | 1        | 1        | 1        | 2.28E-13  | 1        | 1        |          |
| 2  | 100079130 | 100079164 | REV1                                  | 7.03E-05 | 3.59E-06 | 1        | 1         | 0.055556 | 1        | 1        | 1        | 1        | 1        | 1        | 1        | 0.001534  | 1        | 0.066667 |          |
| 2  | 14127360  | 14127372  | CE1B                                  | 5.21E-14 | 3.65E-13 | 0.007103 | 0.013423  | 0.133986 | 0.118312 | 1        | 1        | 1        | 0.044113 | 1        | 1        | 0.113636  | 1        | 0.067606 |          |
| 2  | 14332736  | 14332743  | NKG6P15                               | 0.026528 | 5.76E-19 | 0.011527 | 0.070084  | 1        | 1        | 1        | 1        | 1        | 0.015038 | 1        | 1        | 1         | 1        | 1        |          |
| 2  | 167138320 | 167138331 | SCN9A                                 | 4.45E-10 | 3.6E-22  | 0.00895  | 0.01227   | 1        | 1        | 0.010935 | 0.016949 | 1        | 0.115385 | 0.001639 | 0.231304 | 2.71E-14  | 0.025316 | 0.012795 |          |
| 2  | 174094381 | 174094392 | MLK7-AS1                              | 1.06E-08 | 6.07E-14 | 1        | 0.140784  | 1        | 1        | 1        | 1        | 1        | 1        | 1        | 1        | 3.4E-08   | 1        | 0.07837  |          |
| 20 | 37191391  | 37191408  | RALGFAPB                              | 2.2E-21  | 4.33E-23 | 0.000111 | 0.219261  | 0.032967 | 0.047707 | 1        | 0.014184 | 1        | 1        | 0.000426 | 1        | 1         | 3.22E-24 | 0.026169 | 0.105841 |
| 20 | 60861505  | 60861519  | OSBP2                                 | 5.09E-05 | 9.03E-23 | 0.013575 | 1         | 1        | 1        | 0.008889 | 0.021053 | 1        | 0.027778 | 1        | 1        | 5.45E-06  | 0.051282 | 0.018939 |          |
| 21 | 34878454  | 34878468  | GART                                  | 2.32E-08 | 1.02E-08 | 1        | 0.02381   | 0.020202 | 1        | 1        | 0.089127 | 1        | 1        | 1        | 1        | 3E-06     | 1        | 1        |          |
| 21 | 36080444  | 36080459  | CLIC6                                 | 1        | 1        | 1        | 0.096154  | 1        | 1        | 1        | 1        | 1        | 1        | 1        | 1        | 0.158416  | 1        | 1        |          |
| 21 | 46602483  | 46602497  | ADORA1                                | 9.23E-16 | 2.16E-23 | 1        | 1         | 1        | 0.001162 | 1        | 1        | 1        | 1        | 0.106023 | 1        | 1         | 5.33E-16 | 0.002501 | 0.100735 |
| 21 | 113166840 | 113166859 | SPIC9                                 | 1.41E-06 | 1.39E-08 | 0.000689 | 1         | 1        | 1        | 1        | 1        | 1        | 1        | 1        | 1        | 2.39E-10  | 1        | 1        |          |
| 3  | 132166148 | 132166162 | DNAC13                                | 1.39E-23 | 3.52E-23 | 0.001639 | 0.019184  | 1        | 1        | 1        | 1        | 1        | 0.056928 | 0.009066 | 1        | 2.49E-16  | 0.001279 | 0.000383 |          |
| 3  | 179333753 | 179333764 | NDUF85                                | 8.31E-07 | 1.47E-10 | 0.130303 | 1         | 0.024631 | 1        | 1        | 1        | 1        | 1        | 1        | 1        | 0.030407  | 1        | 0.149436 |          |
| 3  | 186522293 | 186522308 | RFC4                                  | 5.42E-21 | 1.1E-20  | 0.065574 | 1         | 1        | 1        | 1        | 0.014925 | 0.012331 | 0.014925 | 1        | 1        | 2.71E-21  | 0.021739 | 0.000609 |          |
| 3  | 19959770  | 19959719  | EFHB                                  | 3.75E-08 | 7.11E-29 | 0.046512 | 0.02      | 0.0625   | 0.049074 | 0.059874 | 0.083333 | 8.74E-05 | 1        | 1        | 1        | 3.04E-14  | 0.002096 | 4.34E-06 |          |
| 3  | 28304768  | 28304779  | CMC1                                  | 3.27E-07 | 3.1E-06  | 0.069737 | 1         | 1        | 1        | 1        | 1        | 1        | 1        | 0.033988 | 1        | 5.79E-08  | 1        | 0.009829 |          |
| 4  | 44506467  | 44506478  | HNHP7                                 | 4.46E-09 | 3.76E-08 | 0.010325 | 1         | 1        | 1        | 1        | 0.085734 | 0.015152 | 1        | 1        | 1        | 1         | 1        | 0.145817 | 0.000928 |
| 4  | 455180652 | 455180651 | DNDP                                  | 0.000189 | 0.000536 | 0.040538 | 1         | 0.399064 | 1        | 1        | 1        | 0.015385 | 0.231486 | 1        | 1        | 0.000514  | 1        | 0.000284 |          |
| 4  | 54265883  | 54265894  | FIP1L1                                | 2.3E-10  | 3.65E-17 | 0.00202  | 1         | 1        | 1        | 1        | 1        | 1        | 0.213481 | 0.0125   | 1        | 2.35E-10  | 0.043956 | 0.126371 |          |
| 4  | 137763868 | 137763912 | KDM3B                                 | 8.39E-07 | 1.19E-08 | 0.088235 | 0.005405  | 1        | 0.037234 | 1        | 1        | 1        | 1        | 1        | 1        | 7.34E-05  | 0.027397 | 0.118831 |          |
| 5  | 14388797  | 14388816  | TRIO                                  | 4.59E-18 | 1.3E-20  | 0.004354 | 1         | 0.077844 | 0.04     | 1        | 1        | 1        | 1        | 1        | 1        | 5.8E-24   | 1        | 0.020425 |          |
| 5  | 413428    | 413452    | AHR                                   | 2E-09    | 0.001034 | 1        | 0.207196  | 0.00061  | 1        | 1        | 1        | 0.074601 | 1        | 0.0625   | 0.22531  | 0.007974  | 0.006453 |          |          |
| 5  | 7896957   | 7896969   | MTR                                   | 1.39E-11 | 4.75E-17 | 0.001279 | 1         | 1        | 0.026515 | 1        | 1        | 1        | 0.057692 | 0.028986 | 1        | 0.202E-18 | 1        | 0.118059 |          |
| 6  | 52788392  | 52788398  | FBXO7                                 | 3.03E-21 | 2.77E-13 | 0.003185 | 0.011725  | 1        | 1        | 1        | 1        | 1        | 0.015873 | 1        | 0.25     | 6.2E-12   | 0.001357 | 2.15E-06 |          |
| 6  | 12332376  | 12332393  | WASL                                  | 6.96E-10 | 5.76E-19 | 0.001207 | 0.010154  | 0.061054 | 0.022321 | 0.030887 | 1        | 1        | 0.055556 | 1        | 1        | 1         | 1        | 1        |          |
| 7  | 151874147 | 151874157 | KMT2C                                 | 2.29E-09 | 4.09E-18 | 1        | 1         | 1        | 0.056738 | 1        | 1        | 1        | 1        | 1        | 1        | 0.04878   | 1        | 0.003687 |          |
| 7  | 84671609  | 84671620  | SEM3A3                                | 5.99E-07 | 4.96E-12 | 1        | 1         | 1        | 0.005814 | 1        | 1        | 1        | 0.065574 | 1        | 1        | 0.000394  | 1        | 1        |          |
| 7  | 92020452  | 92020465  | ANKR1                                 | 2.57E-10 | 2.12E-28 | 0.000219 | 1         | 0.150456 | 0.028986 | 1        | 1        | 1        | 1        | 1        | 1        | 3.34E-17  | 1        | 3.21E-06 |          |
| 8  | 80831393  | 80831407  | MRF2S2                                | 1.42E-32 | 7.74E-32 | 0.000816 | 0.010638  | 1        | 1        | 0.000276 | 1        | 0.014388 | 0.092613 | 0.05     | 0.105263 | 3.58E-23  | 1        | 2.6E-06  |          |
| 9  | 13193320  | 13193323  | PMPO2                                 | 4.36E-16 | 2.96E-15 | 0.089852 | 1         | 0.060811 | 1        | 1        | 0.013889 | 1        | 0.017857 | 1        | 1        | 7.02E-06  | 0.037073 | 0.007923 |          |
| X  | 18180397  | 18181313  | BNID2                                 | 1.33E-12 | 4.43E-19 | 0.045455 | 0.004673  | 0.197186 | 0.066645 | 0.013216 | 1        | 0.155956 | 1        | 1        | 0.001302 | 0.2       | 0.000927 |          |          |
| X  | 48136511  | 48136518  | SSX1(dist=9636),SSX9(dist=24459)      | 1.44E-16 | 8.9E-24  | 1        | 0.088335  | 1        | 1        | 1        | 1        | 1        | 1        | 0.000514 | 1        | 1         | 0.025316 | 0.064307 |          |
| X  | 48214185  | 48214200  | SSX3                                  | 1.25E-42 | 1.4E-26  | 0.000302 | 0.0171332 | 1        | 0.000247 | 0.046869 | 0.004667 | 0.001442 | 1        | 1        | 1        | 2.22E-27  | 0.001852 | 2.51E-06 |          |
| 1  | 116234024 | 116234041 | VANGL1                                | 0.002156 | 7.32E-07 | 1        | 1         | 1        | 1        | 1        | 1        | 1        | 1        | 1        | 1        | 0.182692  | 1        | 1        |          |
| 1  | 116655183 | 116655197 | MAB21L3                               | 1.1E-14  | 3.9E-26  | 0.058824 | 1         | 0.095238 | 0.025236 | 0.000479 | 1        | 0.029851 | 1        | 1        | 6.5E-08  | 0.053684  | 0.000789 |          |          |
| 1  | 153994527 | 153994552 | NUP210L                               | 1.01E-06 | 1.65E-06 | 1        | 0.068182  | 1        | 1        | 0.131579 | 0.0181   |          |          |          |          |           |          |          |          |





|    |           |           |                 |          |          |          |          |          |           |          |          |          |          |          |          |          |          |           |          |
|----|-----------|-----------|-----------------|----------|----------|----------|----------|----------|-----------|----------|----------|----------|----------|----------|----------|----------|----------|-----------|----------|
| 1  | 158260878 | 158260892 | CD1C            | 2.63E-27 | 3.73E-08 | 0.136591 | 1        | 0.089841 | 0.117543  | 1        | 1        | 0.02909  | 0.05817  | 0.028571 | 1        | 1.1E-12  | 1        | 0.021466  |          |
| 9  | 39753377  | 39753390  | IDO1            | 2.71E-27 | 5.68E-17 | 0.113884 | 1        | 1        | 1         | 1        | 1        | 1        | 1        | 1        | 1        | 1        | 1        | 0.009087  |          |
| 19 | 3494531   | 3494534   | UBA2            | 2.76E-27 | 3.15E-27 | 0.239851 | 1        | 1        | 0.071194  | 0.027778 | 1        | 1        | 0.009346 | 0.055556 | 1        | 1        | 2.33E-15 | 0.000831  |          |
| 7  | 87212097  | 8721212   | PHML1           | 3.12E-27 | 1.08E-13 | 0.088613 | 1        | 1        | 1         | 1        | 1        | 1        | 0.038899 | 0.053537 | 1        | 1        | 1.93E-05 | 0.039482  |          |
| 3  | 108224685 | 108224701 | MYH15           | 3.61E-27 | 2.7E-25  | 0.011868 | 1        | 0.204267 | 0.000777  | 1        | 1        | 1        | 0.074045 | 0.051724 | 1        | 1        | 1.92E-27 | 0.070768  |          |
| 6  | 88221097  | 88221109  | SLC35A1         | 3.74E-27 | 2.66E-20 | 1        | 1        | 0.208116 | 1         | 1        | 1        | 1        | 1        | 1        | 1        | 1        | 1.69E-14 | 0.004195  |          |
| 4  | 39233719  | 39233734  | MIR1273H        | 3.79E-27 | 2.05E-24 | 0.001442 | 1        | 1        | 1         | 0.000372 | 1        | 1        | 0.045796 | 1.34E-05 | 0.079184 | 1        | 1.74E-20 | 0.000903  |          |
| 2  | 219341717 | 219341700 | USP37           | 3.95E-27 | 5.11E-20 | 0.000278 | 1        | 1        | 0.013514  | 1        | 1        | 1        | 1        | 1        | 1        | 1        | 5.98E-23 | 0.012048  |          |
| 20 | 34435246  | 34435270  | PHF20           | 4.01E-27 | 4.69E-19 | 0.08216  | 1        | 1        | 0.014493  | 1        | 1        | 1        | 0.026786 | 1        | 0.031746 | 1        | 2.02E-22 | 5.52E-07  |          |
| 15 | 22848150  | 22848166  | TUBGCP5         | 4.46E-27 | 1.41E-19 | 0.006645 | 1        | 1        | 1         | 1        | 1        | 1        | 1        | 1        | 1        | 1        | 3.42E-14 | 0.029412  |          |
| 12 | 42835328  | 42835333  | PHML1           | 5.23E-27 | 1.81E-05 | 0.006957 | 1        | 1        | 1         | 1        | 1        | 1        | 0.007092 | 1        | 0.015625 | 1        | 1        | 3.93E-29  |          |
| 4  | 39511530  | 39511543  | MIR1273H        | 5.81E-27 | 4.21E-24 | 0.00895  | 0.062001 | 0.48066  | 0.082152  | 0.006    | 1        | 1        | 0.008772 | 0.000702 | 1        | 1        | 5.54E-12 | 0.0100144 |          |
| 7  | 107336262 | 107336274 | SLC26A4         | 5.85E-27 | 8.07E-13 | 1        | 1        | 1        | 1         | 1        | 1        | 1        | 1        | 1        | 1        | 1        | 5.99E-16 | 0.107071  |          |
| 5  | 14678762  | 14678776  | OTULIN          | 6.01E-27 | 1.21E-14 | 0.08     | 0.012821 | 1        | 1         | 1        | 1        | 1        | 1        | 1        | 1        | 1        | 4.57E-18 | 0.044944  |          |
| 8  | 30933816  | 30933829  | WRN             | 6.78E-27 | 1.12E-17 | 0.010274 | 1        | 1        | 1         | 0.037497 | 1        | 1        | 0.019802 | 0.05618  | 1        | 1        | 1.8E-28  | 0.000131  |          |
| 19 | 21350520  | 21350533  | ZNF431          | 7.67E-27 | 2.9E-26  | 0.03333  | 1        | 0.163647 | 0.065772  | 1        | 1        | 1        | 0.084864 | 0.057143 | 0.015385 | 1        | 7.3E-13  | 0.034884  |          |
| 8  | 23712066  | 23712089  | ITFC            | 7.9E-27  | 2.0E-28  | 0.001068 | 0.000606 | 1        | 0.186019  | 0.150101 | 1        | 1        | 1        | 0.000439 | 1        | 1        | 5.72E-24 | 1.84E-05  |          |
| K  | 135115669 | 135115681 | SLC6A5          | 9.03E-27 | 3.5E-28  | 0.58824  | 1        | 0.003036 | 1         | 1        | 1        | 1        | 0.029961 | 1        | 1        | 1        | 2.36E-18 | 0.002896  |          |
| 7  | 138453892 | 138453909 | KITLGOM4        | 9.2E-27  | 9.62E-18 | 1        | 1        | 0.338135 | 0.024446  | 0.073864 | 1        | 1        | 0.001721 | 0.087391 | 0.048778 | 1        | 1.35E-10 | 0.069549  |          |
| 6  | 108076870 | 108076886 | SLC26A          | 1E-26    | 1.88E-17 | 0.006719 | 1        | 1        | 1         | 0.026053 | 1        | 1        | 1        | 0.021429 | 0.056027 | 1        | 1        | 0.101212  | 0.163512 |
| 11 | 125763610 | 125763624 | PUS3            | 1.01E-26 | 2.68E-20 | 1        | 1        | 1        | 0.105969  | 0.013636 | 1        | 1        | 0.047244 | 0.101519 | 0.005348 | 1        | 3.46E-21 | 0.094077  |          |
| 12 | 64491002  | 64491019  | SRGAP1          | 1.11E-26 | 1.27E-28 | 0.000611 | 1        | 0.042735 | 0.001046  | 0.016598 | 1        | 1        | 0.031619 | 0.039474 | 0.001081 | 1        | 2.94E-20 | 0.136087  |          |
| 3  | 16636093  | 16636108  | DAZL            | 1.13E-26 | 2.74E-08 | 1        | 1        | 0.096608 | 1         | 1        | 1        | 1        | 0.081818 | 0.095924 | 0.016949 | 0.298246 | 1.73E-18 | 0.0031    |          |
| 6  | 71571688  | 71571707  | SMAF1           | 1.45E-26 | 4.97E-09 | 0.004096 | 1        | 0.139558 | 0.053147  | 1        | 1        | 1        | 1        | 1        | 1        | 4.012486 | 3.21E-23 | 0.001878  |          |
| 2  | 30051705  | 30051722  | NF2             | 1.72E-26 | 4.02E-08 | 4.53E-05 | 1        | 1        | 1         | 1        | 1        | 1        | 1        | 1        | 1        | 1        | 0.06014  | 0.002971  |          |
| 13 | 67340663  | 67340673  | ANKK3           | 1.72E-26 | 5.95E-13 | 0.03384  | 1        | 0.202709 | 0.105     | 1        | 1        | 1        | 1        | 1        | 1        | 1        | 0.051101 | 0.007369  |          |
| 13 | 115011550 | 115011564 | CDIC16          | 1.79E-26 | 5.45E-06 | 0.000936 | 1        | 1        | 1         | 1        | 1        | 1        | 0.012987 | 0.031746 | 1        | 1        | 1.33E-21 | 0.012262  |          |
| 2  | 236817336 | 236817351 | AGAP1           | 1.84E-26 | 1.54E-17 | 1        | 0.067277 | 1        | 0.208568  | 1        | 1        | 1        | 0.005598 | 1        | 0.002885 | 1        | 1.88E-13 | 0.010786  |          |
| 14 | 75199555  | 75199568  | FCF1            | 1.88E-26 | 2.01E-16 | 0.055556 | 1        | 0.129353 | 0.001225  | 0.021277 | 1        | 1        | 0.007576 | 1        | 1        | 1        | 6.13E-13 | 0.027778  |          |
| 2  | 64331815  | 64331833  | PEL1            | 2.08E-26 | 1.94E-30 | 0.002225 | 1        | 0.201985 | 0.100883  | 0.105168 | 1        | 1        | 0.096087 | 0.156108 | 0.024096 | 1        | 2.42E-18 | 0.001203  |          |
| 1  | 117605130 | 117605145 | ITFC            | 2.09E-26 | 3.04E-06 | 0.001087 | 0.016129 | 1        | 1         | 1        | 1        | 1        | 1        | 1        | 1        | 1        | 0.142857 | 0.315789  |          |
| 12 | 72067966  | 72067980  | THAP2           | 2.3E-26  | 8.05E-20 | 0.009231 | 1        | 1        | 1         | 1        | 1        | 1        | 0.007519 | 4.52E-05 | 0.066667 | 1.36E-09 | 0.004152 | 5.21E-05  |          |
| 9  | 138453892 | 138453909 | KITLGOM4        | 2.34E-26 | 6.69E-13 | 0.000893 | 1        | 1        | 0.048778  | 1        | 1        | 1        | 0.000716 | 1        | 0.003411 | 1        | 0.001949 | 0.002149  |          |
| 20 | 35695555  | 35695562  | RRL1            | 3.44E-26 | 3.54E-27 | 7.31E-05 | 1        | 1        | 0.186929  | 1        | 1        | 1        | 0.038998 | 1        | 1        | 1        | 4.26E-34 | 0.000255  |          |
| 14 | 104465128 | 104465144 | TDRD9           | 4.05E-26 | 2.24E-23 | 2.8E-05  | 1        | 1        | 1         | 1        | 1        | 1        | 0.037879 | 1        | 1        | 1        | 6.97E-20 | 0.011364  |          |
| 9  | 15472611  | 15472623  | PSIP1           | 4.18E-26 | 6.14E-30 | 0.004193 | 1        | 0.056342 | 1         | 1        | 1        | 1        | 0.036864 | 0.051948 | 1        | 1        | 1.76E-19 | 4.35E-05  |          |
| 16 | 19619602  | 19619617  | L16orf67        | 4.58E-26 | 6.93E-26 | 0.002414 | 1        | 0.042404 | 0.073877  | 1        | 1        | 1        | 0.035928 | 1        | 1        | 1        | 1.7E-12  | 0.076897  |          |
| 3  | 71008341  | 71008362  | FOXF1           | 4.64E-26 | 5.43E-27 | 0.001488 | 0.041375 | 1        | 1         | 0.093778 | 1        | 1        | 1        | 1        | 1        | 1        | 0.062004 | 1.84E-30  |          |
| 2  | 299241445 | 299241460 | TRAF3IP1        | 4.7E-26  | 5.94E-23 | 0.000345 | 0.015152 | 1        | 0.026738  | 0.056325 | 0.009615 | 0.007937 | 1        | 0.034483 | 1        | 2.65E-27 | 0.000101 |           |          |
| 8  | 116404611 | 116404623 | ANKK3           | 4.82E-26 | 3.56E-06 | 0.019183 | 1        | 0.011723 | 0.0069783 | 1        | 1        | 1        | 0.080775 | 1        | 1        | 1        | 0.000686 | 0.003406  |          |
| 1  | 18383100  | 18383113  | ZFNK1           | 4.96E-26 | 2.91E-27 | 0.007869 | 1        | 0.065772 | 0.004105  | 1        | 1        | 1        | 0.017391 | 1        | 0.095238 | 1        | 3.12E-16 | 0.145726  |          |
| 1  | 220369745 | 220369758 | RAB39A2         | 5.65E-26 | 1.06E-18 | 0.004444 | 0.072141 | 0.005665 | 0.000406  | 0.073145 | 1        | 1        | 0.04202  | 1        | 1        | 1        | 1.43E-15 | 0.08195   |          |
| 2  | 203079025 | 203079039 | SUJMO1          | 7.14E-26 | 1.92E-09 | 0.003418 | 1        | 1        | 1         | 1        | 1        | 1        | 0.04     | 1        | 1        | 1        | 2.47E-26 | 0.10279   |          |
| 12 | 22215194  | 22215212  | CMAS            | 7.87E-26 | 1.67E-11 | 0.005348 | 0.12069  | 1        | 1         | 0.090909 | 1        | 1        | 1        | 0.041667 | 0.010989 | 1.32E-15 | 0.013514 | 0.004129  |          |
| 1  | 94964139  | 94964155  | ABCD3           | 8.28E-26 | 1.25E-31 | 8.25E-05 | 0.019704 | 0.261595 | 0.135291  | 0.076889 | 1        | 1        | 1        | 1        | 1        | 1        | 3.84E-34 | 0.004736  |          |
| 6  | 117243181 | 117243196 | RFX6            | 8.38E-26 | 3.71E-21 | 0.068418 | 1        | 1        | 0.134256  | 1        | 1        | 1        | 0.044771 | 1        | 1        | 1        | 4.61E-10 | 0.000926  |          |
| 4  | 40305784  | 40305799  | NFKB1           | 9.17E-26 | 5.39E-15 | 0.000765 | 1        | 1        | 0.122552  | 1        | 1        | 1        | 1        | 1        | 1        | 1        | 0.037632 | 0.337662  |          |
| 17 | 4081035   | 4081048   | ZNF1            | 9.24E-26 | 5.07E-18 | 0.077768 | 1        | 0.053193 | 1         | 1        | 1        | 1        | 0.29412  | 1        | 0.052381 | 1        | 3.69E-14 | 0.071429  |          |
| 6  | 61145498  | 61145512  | REL             | 9.33E-26 | 6.87E-27 | 0.074746 | 1        | 1        | 1         | 1        | 1        | 1        | 0.117986 | 0.027778 | 1        | 1        | 8.69E-21 | 1.26E-05  |          |
| 3  | 180679235 | 180679250 | FKR1            | 9.84E-26 | 2.28E-16 | 0.000113 | 0.025236 | 0.064815 | 0.00023   | 1        | 1        | 1        | 1        | 0.001184 | 1        | 1        | 4.28E-19 | 0.016128  |          |
| X  | 44386435  | 44386460  | FUNDC1          | 1.04E-25 | 1.15E-11 | 0.002714 | 1        | 0.058824 | 1         | 1        | 1        | 1        | 1        | 1        | 1        | 1        | 1.23E-26 | 3.97E-07  |          |
| 14 | 141294271 | 141294299 | LRP1B           | 1.04E-25 | 1.04E-09 | 6.52E-06 | 1        | 1        | 0.031432  | 1        | 1        | 1        | 1        | 0.046154 | 1        | 1        | 1.86E-13 | 0.091382  |          |
| 4  | 71888332  | 71888348  | BCK             | 1.06E-25 | 1.35E-13 | 0.007389 | 1        | 1        | 1         | 1        | 1        | 1        | 0.008621 | 0.024048 | 1        | 1        | 8.61E-06 | 1         |          |
| 20 | 7021106   | 7021112   | ITFC            | 1.09E-25 | 4.1E-27  | 0.000481 | 1        | 1        | 1         | 1        | 1        | 1        | 0.06473  | 1        | 1        | 1        | 2.4E-26  | 0.089342  |          |
| 1  | 8643595   | 8643597   | COL2A1          | 1.11E-25 | 1.77E-09 | 0.000982 | 1        | 1        | 1         | 1        | 1        | 1        | 0.078322 | 1        | 3.62E-07 | 0.00226  | 0.027778 |           |          |
| 3  | 10128965  | 10128985  | FANCD2-FANCD2OS | 1.11E-25 | 5.32E-12 | 0.003702 | 1        | 0.079022 | 1         | 0.013514 | 1        | 1        | 0.012579 | 1        | 1        | 1        | 2.68E-18 | 0.001522  |          |
| 17 | 74736999  | 74737016  | MFSO11          | 1.19E-25 | 4.26E-23 | 0.002283 | 0.055989 | 0.186157 | 0.052853  | 0.007756 | 1        | 1        | 0.113526 | 1        | 0.030769 | 0.222222 | 3.71E-21 | 1         |          |
| 15 | 65273147  | 65273161  | SPG21           | 1.38E-25 | 6.01E-14 | 0.013256 | 0.041447 | 0.001333 | 1         | 1        | 1        | 1        | 0.23077  | 1        | 1        | 1        | 0.000784 | 1         |          |
| 16 | 24574691  | 24574710  | RBBP6           | 1.39E-25 | 3.74E-18 | 0.018939 | 1        | 0.126504 | 1         | 1        | 1        | 1        | 0.017544 | 0.095238 | 5.79E-22 | 0.048479 | 1        | 1         |          |
| 6  | 20758808  | 20758822  | CDKAL1          | 1.43E-25 | 3.13E-21 | 0.001639 | 0.006289 | 0.281689 | 0.061839  | 0.003922 | 1        | 1        | 0.090044 | 0.041184 | 0.003759 | 1        | 7.44E-28 | 0.023256  |          |
| 17 | 8417006   | 8417020   | MIR10           | 1.54E-25 | 1.08E-28 | 0.001332 | 0.000345 | 1        | 0.090333  | 0.012022 | 1        | 1        | 0.000275 | 0.113835 | 0.230769 | 1        | 3.95E-19 | 0.000496  |          |
| 1  | 17104693  | 17104719  | RNXP3B          | 1.60E-25 | 2.09E-13 | 0.019183 | 0.060606 | 1        | 1         | 0.037079 | 0.002338 | 0.054054 | 1        | 1        | 1        | 1        | 0.001949 | 0.007369  |          |
| 6  | 64289938  | 64289954  | PTNA1           | 1.69E-25 | 1.81E-42 | 0.007389 | 1        | 0.114638 | 0.000544  | 1        | 1        | 1        | 1        | 1        | 1        | 1        | 1.74E-10 | 0.041881  |          |
| 9  | 86354663  | 86354679  | AGAP1           | 1.97E-25 | 1.96E-14 | 0.000234 | 1        | 1        | 1         | 0.000295 | 1        | 1        | 0.013889 | 0.005009 | 0.050949 | 1        | 1.3E-21  | 0.028302  |          |
| 12 | 107237602 | 107237626 | RICB8           | 2.05E-25 | 2.26E-27 | 0.001815 | 1        | 1        | 0.001984  | 3.5E-06  | 1        | 1        | 0.000457 | 0.028571 | 1        | 1        | 4.4E-22  | 0.000219  |          |
| 12 |           |           |                 |          |          |          |          |          |           |          |          |          |          |          |          |          |          |           |          |

|    |           |           |                        |          |          |          |          |          |          |          |           |          |           |          |          |          |          |          |
|----|-----------|-----------|------------------------|----------|----------|----------|----------|----------|----------|----------|-----------|----------|-----------|----------|----------|----------|----------|----------|
| 13 | 50586051  | 50586064  | DLEJ2                  | 4.51E-24 | 1.07E-26 | 0.061224 | 1        | 0.01144  | 0.030303 | 1        | 0.027118  | 0.052326 | 0.036364  | 1        | 1.74E-21 | 0.029641 | 0.164639 |          |
| 1  | 153617510 | 153617526 | CHTPO                  | 4.77E-24 | 1.61E-16 | 0.163043 | 0.033419 | 0.162921 | 0.000965 | 0.046777 | 1         | 1        | 0.000391  | 1        | 2.48E-07 | 1.58E-05 | 0.021233 |          |
| 6  | 70499209  | 70499222  | LMBRD1                 | 4.86E-24 | 1.93E-16 | 0.000101 | 0.010638 | 1        | 0.05613  | 1        | 0.019802  | 1        | 1         | 1        | 2.63E-16 | 0.054795 | 0.002578 |          |
| 4  | 10089876  | 10089893  | CSX3                   | 4.94E-24 | 1.82E-16 | 0.000047 | 1        | 0.001122 | 0.018405 | 0.02749  | 0.0238095 | 0.02749  | 0.0238095 | 0.02749  | 1.75E-16 | 0.030375 | 0.001945 |          |
| 7  | 33217071  | 33217084  | BSS9                   | 5.49E-24 | 4.73E-11 | 0.044963 | 1        | 0.050847 | 1        | 0.00431  | 0.102121  | 1        | 0.102121  | 1        | 1.67E-14 | 0.017241 | 0.023177 |          |
| 5  | 36629801  | 36629815  | SLC1A3                 | 5.55E-24 | 2.31E-18 | 0.000405 | 0.012422 | 1        | 0.044776 | 1        | 0.014493  | 1        | 1         | 0.025641 | 1        | 7.68E-15 | 8.23E-06 | 0.000245 |
| 9  | 131715001 | 131715017 | NUF18                  | 5.93E-24 | 8.62E-22 | 0.000208 | 0.015873 | 0.09703  | 1        | 1        | 1         | 1        | 0.002177  | 1        | 4.43E-23 | 1        | 0.274612 |          |
| 5  | 122940980 | 122941019 | CNSK1G3                | 6.38E-24 | 1.29E-13 | 0.063987 | 1        | 1        | 0.082804 | 1        | 1         | 0.000345 | 0.000439  | 1        | 8.68E-13 | 1        | 0.000845 |          |
| 15 | 58974349  | 58974361  | ADAM10                 | 6.53E-24 | 6.91E-22 | 0.076923 | 1        | 1        | 0.015873 | 1        | 1         | 0.015873 | 1         | 7.25E-13 | 0.027277 | 8.36E-06 |          |          |
| 17 | 30500816  | 30500828  | RHM01                  | 7.04E-24 | 6.4E-34  | 0.004281 | 1        | 1        | 0.069695 | 0.007605 | 0.012346  | 1        | 0.021739  | 1        | 7.03E-17 | 0.024691 | 1        |          |
| 22 | 44083327  | 44083345  | RHB1                   | 7.13E-24 | 4.71E-07 | 0.043508 | 1        | 1        | 1        | 0.059701 | 1         | 0.006394 | 1         | 1        | 1.75E-16 | 0.064501 | 0.112456 |          |
| X  | 52674318  | 52674335  | SSX7                   | 7.22E-24 | 1.56E-06 | 0.013123 | 1        | 1        | 1        | 1        | 1         | 1        | 1         | 1        | 2.91E-21 | 1        | 2.58E-05 |          |
| K  | 33584644  | 33584674  | LTBP1                  | 7.28E-24 | 0.000146 | 0.185714 | 1        | 1        | 1        | 1        | 1         | 0.054545 | 1         | 1        | 1        | 2.09E-09 | 0.019591 | 8.14E-05 |
| X  | 83403148  | 83403160  | RPS6KA6                | 8.44E-24 | 1.97E-08 | 0.071429 | 1        | 1        | 0.013889 | 0.019048 | 1         | 1        | 0.034483  | 0.26087  | 8.34E-11 | 0.000974 | 0.000541 |          |
| 19 | 47700438  | 47700453  | SAEL                   | 8.49E-24 | 1.75E-26 | 0.189947 | 0.177066 | 1        | 1        | 1        | 0.019048  | 0.002919 | 0.016667  | 1        | 5.22E-18 | 0.011765 | 2.39E-06 |          |
| 16 | 3808052   | 3808066   | CREBBP                 | 9.43E-24 | 1.7E-25  | 9.19E-07 | 0.010152 | 1        | 1        | 1        | 0.047994  | 1        | 0.28      | 1.29E-25 | 0.011647 | 0.004188 |          |          |
| 2  | 32117217  | 32117230  | MEMO1                  | 1.11E-23 | 3.7E-31  | 0.00439  | 0.004587 | 1        | 0.05491  | 1        | 0.02909   | 0.114638 | 1         | 1        | 1.85E-29 | 0.033333 | 0.085546 |          |
| 9  | 73164596  | 73164610  | TRPM3                  | 1.11E-23 | 6.17E-39 | 0.171717 | 0.008658 | 0.202665 | 1        | 1        | 1         | 0.000598 | 1         | 1        | 9.79E-10 | 1        | 0.000313 |          |
| 9  | 97555228  | 97555242  | CRNFB3                 | 1.13E-23 | 1.64E-35 | 0.004476 | 0.005376 | 1        | 0.0956   | 1        | 0.000309  | 1        | 1         | 0.000496 | 0.024631 | 1.37E-05 | 0.001916 |          |
| X  | 151996539 | 151996552 | CEN2N                  | 1.15E-23 | 1.51E-16 | 1        | 1        | 1        | 0.141512 | 1        | 0.139332  | 1        | 1         | 1        | 3.21E-06 | 1        | 0.001094 |          |
| 14 | 68582259  | 68582279  | RAD51B                 | 1.16E-23 | 6.47E-21 | 0.002714 | 1        | 0.04186  | 0.002094 | 1        | 0.013514  | 0.052632 | 0.013889  | 1        | 8.94E-30 | 0.031915 | 0.079546 |          |
| 21 | 30356973  | 30356986  | LTN1                   | 1.21E-23 | 1.02E-16 | 0.092593 | 0.056593 | 0.075161 | 1        | 1        | 1         | 1        | 1         | 1        | 2.79E-15 | 0.03125  | 5.93E-06 |          |
| 7  | 27136460  | 27136473  | GABPA                  | 1.35E-23 | 2.78E-21 | 0.000546 | 1        | 1        | 1        | 0.00463  | 0.013889  | 1        | 1         | 1        | 1.32E-24 | 1        | 0.002233 |          |
| 7  | 139097271 | 139097295 | C7orf55-LUC7L2, LUC7L2 | 1.38E-23 | 8.07E-32 | 0.001317 | 1        | 0.19065  | 0.000233 | 1        | 0.000363  | 0.000116 | 0.018519  | 1        | 5.26E-20 | 1        | 0.009165 |          |
| 14 | 60516914  | 60516927  | DHR57                  | 1.43E-23 | 2.39E-15 | 0.054545 | 1        | 1        | 0.040265 | 1        | 0.20408   | 1        | 1         | 1        | 3.79E-25 | 0.030928 | 8.79E-06 |          |
| 1  | 128330423 | 128330431 | CCND3                  | 1.43E-23 | 1.06E-31 | 0.000084 | 0.005128 | 0.158933 | 0.337736 | 0.019139 | 0.03354   | 0.040984 | 0.016123  | 1        | 1        | 1        | 0.001846 |          |
| 14 | 103192774 | 103192791 | RCOR1                  | 1.54E-23 | 9.54E-15 | 0.007937 | 1        | 0.009886 | 0.353337 | 1        | 0.012579  | 1        | 1         | 1        | 8.42E-10 | 0.047619 | 0.271301 |          |
| 7  | 95775848  | 95775863  | SLC25A13               | 1.55E-23 | 6.18E-25 | 0.006209 | 0.026577 | 0.045455 | 0.049587 | 0.037972 | 1         | 2.8E-06  | 0.002096  | 0.230769 | 6.52E-23 | 0.001111 | 0.00013  |          |
| 8  | 96047806  | 96047820  | NUDFA6                 | 1.57E-23 | 1.93E-14 | 0.013549 | 0.074113 | 1        | 0.093458 | 1        | 0.112584  | 0.086207 | 1         | 1        | 2E-21    | 1        | 0.001163 |          |
| 9  | 21861902  | 21861914  | MTAP                   | 1.58E-23 | 1.36E-24 | 0.09375  | 0.014423 | 0.146098 | 0.076163 | 0.048511 | 1         | 0.061842 | 0.153846  | 1        | 4.4E-19  | 1        | 0.042253 |          |
| 22 | 39079920  | 39079936  | TMOM22                 | 1.58E-23 | 1.94E-07 | 0.000175 | 1        | 1        | 1        | 1        | 0.030303  | 1        | 2.45E-21  | 0.02439  | 0.131876 | 1        | 0.000313 |          |
| 14 | 23870220  | 23870234  | MYH6                   | 1.69E-23 | 2.07E-08 | 0.094077 | 1        | 1        | 1        | 1        | 0.095188  | 1        | 1         | 1        | 2.31E-10 | 0.012821 | 0.059748 |          |
| 4  | 48734323  | 48734332  | CRN1R21                | 1.71E-23 | 0.000567 | 0.000484 | 0.13864  | 0.074393 | 1        | 1        | 0.027272  | 1        | 1         | 1        | 1        | 1        | 0.001652 |          |
| X  | 30569609  | 30569622  | GSR                    | 1.78E-23 | 1.72E-90 | 0.013213 | 1        | 0.016878 | 0.004082 | 1        | 0.003923  | 0.018519 | 1         | 1.37E-18 | 0.024691 | 2.33E-05 |          |          |
| 13 | 115002097 | 115002111 | CDIC6                  | 1.82E-23 | 1.82E-18 | 1        | 1        | 0.07823  | 1        | 1        | 0.07337   | 0.011905 | 1         | 0.0004   | 1        | 0.006628 |          |          |
| 13 | 102235764 | 102235780 | TGFB1L                 | 1.94E-23 | 2.09E-20 | 0.011723 | 0.02765  | 0.101961 | 0.118439 | 1        | 0.085849  | 1        | 0.074074  | 0.24     | 2.28E-26 | 0.002449 | 0.381991 |          |
| 8  | 38138934  | 38138975  | WHSC1L1                | 1.95E-23 | 7.88E-13 | 1        | 1        | 1        | 1        | 0.008264 | 1         | 1        | 1         | 1        | 6.07E-18 | 1        | 0.10881  |          |
| 5  | 134015495 | 134015508 | SEC2A4                 | 2.01E-23 | 2.52E-29 | 0.007937 | 1        | 0.142616 | 0.085261 | 1        | 1         | 1        | 1         | 1        | 6.38E-08 | 1        | 0.015173 |          |
| 1  | 173490477 | 173490517 | SLC6C2                 | 2.07E-23 | 9.55E-20 | 0.010081 | 0.008969 | 0.072222 | 1        | 1        | 0.021727  | 1        | 0.013514  | 1        | 1.46E-24 | 1        | 0.052576 |          |
| 1  | 110533444 | 110533460 | PCP1A1                 | 2.11E-23 | 9.76E-24 | 0.009087 | 0.03471  | 0.137149 | 0.163179 | 1        | 0.071406  | 1        | 0.032258  | 0.055586 | 1        | 1        | 0.04049  |          |
| 4  | 5977508   | 5789750   | FRBP7                  | 2.25E-23 | 2.07E-17 | 0.125    | 0.004785 | 1        | 1        | 1        | 1         | 1.4E-06  | 1         | 1        | 1.22E-05 | 0.001485 | 0.06599  |          |
| 22 | 16404838  | 16404857  | POTHD1                 | 2.26E-23 | 0.111111 | 0.004239 | 1        | 1        | 1        | 1        | 1         | 1        | 0.005746  | 0.016206 | 2.97E-17 | 9.69E-06 | 0.024853 |          |
| X  | 19024426  | 19024440  | GRP64                  | 2.28E-23 | 6.81E-23 | 1        | 0.066667 | 1        | 1        | 1        | 1         | 0.004662 | 1         | 1        | 1.52E-14 | 5.26E-05 | 0.001597 |          |
| X  | 134033226 | 134033239 | MOSP1                  | 2.33E-23 | 5.8E-23  | 0.001639 | 1        | 0.145249 | 1        | 0.041318 | 1         | 1        | 0.015625  | 1        | 2.98E-13 | 0.028169 | 0.005706 |          |
| 1  | 22030115  | 22030132  | USP48                  | 2.53E-23 | 3.94E-31 | 0.066667 | 1        | 1        | 1        | 0.004219 | 1         | 1        | 1         | 1        | 1E-10    | 0.001433 | 0.00021  |          |
| 2  | 162081128 | 162081140 | TANK                   | 2.6E-23  | 1.57E-21 | 0.073171 | 1        | 0.010299 | 1        | 0.037726 | 1         | 0.000414 | 1         | 3.33E-21 | 0.02381  | 0.120928 |          |          |
| 8  | 3881443   | 3881447   | ADMP                   | 2.84E-23 | 9.3E-30  | 0.000467 | 0.018072 | 0.071429 | 0.037936 | 1        | 0.005128  | 1        | 0.034176  | 0.01667  | 1        | 0.06232  | 0.001485 |          |
| 21 | 33132531  | 33132554  | HUMK                   | 3.05E-23 | 2E-10    | 0.000466 | 1        | 0.004666 | 1        | 1        | 0.01122   | 1        | 1         | 1        | 1.05E-22 | 0.021739 | 0.077046 |          |
| 1  | 23329592  | 23329607  | PCMK2                  | 3.26E-23 | 6.59E-12 | 0.001753 | 1        | 0.053846 | 1        | 1        | 0.015152  | 0.001845 | 1         | 1        | 1.07E-12 | 1        | 0.002097 |          |
| 1  | 178937630 | 178937642 | PIK3CA                 | 3.66E-23 | 8.49E-10 | 0.054545 | 1        | 1        | 1        | 1        | 0.027778  | 1        | 0.65E-14  | 0.000903 | 0.000201 | 1        | 0.000201 |          |
| 6  | 52400479  | 52400497  | TRAM2                  | 3.67E-23 | 1.33E-12 | 0.001221 | 1        | 1        | 0.038961 | 1        | 1         | 1        | 1         | 1        | 4.45E-16 | 1        | 5.38E-05 |          |
| 1  | 63044645  | 63044661  | DOC7C                  | 3.67E-23 | 2.55E-22 | 0.003129 | 0.076923 | 1        | 0.004034 | 1        | 1         | 1        | 1         | 1        | 5.64E-31 | 1        | 0.00493  |          |
| 1  | 53267474  | 53267488  | ZYG11B                 | 3.78E-23 | 7.37E-11 | 1        | 1        | 1        | 1        | 0.001753 | 0.184211  | 1.85E-20 | 0.026667  | 0.002559 | 1        | 1        | 0.001597 |          |
| 12 | 97081927  | 97081937  | CRN1R21                | 3.98E-23 | 3.48E-07 | 0.005823 | 1        | 0.075648 | 0.011466 | 1        | 0.049192  | 0.143433 | 1         | 0.054945 | 5.75E-22 | 1        | 0.001597 |          |
| 8  | 9626005   | 9626007   | CRN1R21                | 4.06E-23 | 8.66E-19 | 0.002381 | 1        | 0.041954 | 1        | 1        | 1         | 1        | 1         | 1        | 1.66E-22 | 1        | 0.001444 |          |
| 4  | 25160732  | 25160748  | SEPS5C5                | 5.03E-23 | 1.49E-08 | 0.026245 | 1        | 0.252552 | 0.077895 | 1        | 0.062242  | 0.046779 | 0.02439   | 1        | 7.17E-19 | 0.001317 | 0.000698 |          |
| 11 | 18379446  | 18379459  | FTGH21                 | 5.13E-23 | 1E-05    | 1        | 1        | 1        | 0.153846 | 1        | 1         | 1        | 1         | 1        | 3E-15    | 0.002177 | 0.283561 |          |
| 3  | 124397249 | 124397262 | KALRN                  | 5.38E-23 | 4.65E-17 | 0.199507 | 0.0625   | 1        | 1        | 1        | 0.042324  | 0.197749 | 0.035714  | 1        | 1.92E-06 | 1        | 0.114673 |          |
| 3  | 134015250 | 134015288 | SEC2A4                 | 5.55E-23 | 6.63E-25 | 0.044776 | 1        | 0.004255 | 1        | 1        | 0.028571  | 1        | 0.028571  | 1        | 3.63E-16 | 0.043011 | 0.059524 |          |
| 6  | 160233406 | 160233421 | KPNAA                  | 5.78E-23 | 8.8E-21  | 0.111801 | 0.029125 | 0.093788 | 0.03448  | 1        | 1         | 0.045113 | 1         | 1        | 2.36E-14 | 1        | 2.39E-06 |          |
| 7  | 12275719  | 12275733  | SLC33A1                | 5.82E-23 | 1.39E-06 | 0.004267 | 1        | 1        | 0.090865 | 1        | 0.014925  | 0.031915 | 1         | 1        | 4.45E-16 | 1        | 1        |          |
| 15 | 76135424  | 76135447  | PKNOX1                 | 6.21E-23 | 9.76E-24 | 0.009087 | 0.079967 | 0.1      | 0.038607 | 1        | 0.038607  | 0.083758 | 1         | 1        | 3.06E-10 | 0.001203 | 0.001444 |          |
| 2  | 230653669 | 230653682 | TRIP12                 | 6.05E-23 | 5.09E-38 | 0.018418 | 1        | 0.059837 | 1        | 1        | 0.045449  | 1        | 0.053684  | 1        | 4.23E-13 | 2.8E-05  | 7.98E-05 |          |
| 10 | 103567465 | 103567600 | MGEA5                  | 6.17E-23 | 1.22E-30 | 0.032406 | 1        | 0.05625  | 1        | 0.017422 | 1         | 1        | 4.22E-23  | 0.039474 | 0.006331 | 1        | 0.000668 |          |
| 12 | 129905035 | 129905050 | ARHGAP18               | 6.44E-23 | 2.27E-13 | 0.02913  | 1        | 0.059322 | 1        | 1        | 1         | 1        | 1         | 1        | 7.26E-12 | 0.013664 | 0.112506 |          |
| X  | 153       |           |                        |          |          |          |          |          |          |          |           |          |           |          |          |          |          |          |

|    |           |           |                        |          |          |          |          |          |          |          |          |          |          |          |          |          |          |           |          |
|----|-----------|-----------|------------------------|----------|----------|----------|----------|----------|----------|----------|----------|----------|----------|----------|----------|----------|----------|-----------|----------|
| 1  | 54395673  | 54395692  | HSPB11                 | 1.16E-21 | 1.64E-15 | 0.005665 | 0.040537 | 0.079365 | 1        | 1        | 0.123877 | 1        | 1        | 1        | 1        | 6.93E-24 | 0.027027 | 0.25037   |          |
| 14 | 31191658  | 31191682  | SCFD1                  | 1.16E-21 | 3.76E-26 | 0.107071 | 0.028949 | 1        | 1        | 0.00197  | 0.000716 | 1        | 1        | 0.065201 | 1        | 0.000381 | 1        | 9.73E-23  | 0.314844 |
| 4  | 178357514 | 178357527 | AGA                    | 1.17E-21 | 3.29E-20 | 0.033898 | 1        | 1        | 1        | 0.01561  | 1        | 1        | 1        | 0.028571 | 1        | 0.07618  | 0.189947 | 0.035887  |          |
| 19 | 9361740   | 9361753   | DRTF24                 | 1.17E-21 | 0.000837 | 1        | 1        | 1        | 1        | 0.043478 | 1        | 1        | 1        | 1        | 0.001398 | 1        | 6.31E-24 | 0.024088  |          |
| 18 | 19119813  | 19119828  | ESCD1                  | 1.28E-21 | 3.02E-16 | 0.000148 | 1        | 1        | 1        | 1        | 1        | 1        | 1        | 0.045752 | 0.000414 | 1        | 3.29E-20 | 0.011057  |          |
| 7  | 27062802  | 27062816  | IFT74                  | 1.31E-21 | 2.03E-24 | 0.052632 | 1        | 1        | 1        | 1        | 1        | 1        | 1        | 1        | 1        | 1        | 1.14E-14 | 1.11E-05  |          |
| 12 | 21639528  | 21639542  | RECLQ                  | 1.32E-21 | 5.72E-08 | 0.00262  | 1        | 1        | 0.372314 | 1        | 1        | 1        | 1        | 0.066927 | 0.053571 | 0.090909 | 4.38E-23 | 0.003057  |          |
| 3  | 113169372 | 113169386 | SPICE1                 | 1.35E-21 | 2.96E-22 | 0.000263 | 0.005025 | 1        | 1        | 1        | 1        | 1        | 1        | 0.018182 | 1        | 1        | 4.4E-25  | 1.0378494 |          |
| X  | 118679315 | 118679331 | ChorF56                | 1.37E-21 | 2.22E-32 | 5.78E-05 | 0.016632 | 1        | 1        | 0.052279 | 1        | 1        | 1        | 0.028267 | 0.002392 | 1        | 1        | 1.79E-09  | 0.365779 |
| 8  | 74204423  | 74204438  | RPL7                   | 1.4E-21  | 7.77E-30 | 0.111111 | 0.012571 | 0.198319 | 1        | 1        | 0.030187 | 0.118211 | 1        | 1        | 1        | 1        | 3E-13    | 0.018423  | 2.76E-06 |
| 1  | 455679543 | 455679573 | DAPF3                  | 1.41E-21 | 1.23E-31 | 1        | 1        | 0.010583 | 0.164309 | 0.035712 | 1        | 1        | 1        | 0.054795 | 0.027027 | 1        | 3.8E-13  | 0.004428  | 0.000548 |
| 8  | 87111362  | 87111372  | RTPEVD02               | 1.44E-21 | 2.03E-05 | 1        | 0.028986 | 1        | 1        | 1        | 1        | 1        | 1        | 1        | 1        | 1        | 1        | 7.43E-05  | 0.002659 |
| 8  | 86189006  | 86189024  | CA13                   | 1.46E-21 | 1.1E-07  | 0.02223  | 1        | 1        | 1        | 1        | 1        | 1        | 1        | 1        | 1        | 0.086957 | 1.73E-22 | 0.131698  | 0.17103  |
| X  | 154578865 | 154578881 | LOC101927830_TMLHE-AS1 | 1.5E-21  | 2.16E-07 | 0.001783 | 1        | 1        | 1        | 1        | 1        | 1        | 1        | 1        | 0.031746 | 0.333333 | 2.65E-09 | 0.037975  | 0.078272 |
| X  | 134049353 | 134049366 | NUPF214                | 1.5E-21  | 9.73E-25 | 0.074074 | 1        | 0.049587 | 1        | 1        | 1        | 1        | 1        | 1        | 0.2      | 1        | 5.5E-12  | 1.26E-05  |          |
| X  | 137451460 | 137451472 | NMES                   | 1.55E-21 | 4.81E-22 | 0.008547 | 0.010055 | 1        | 0.028846 | 1        | 1        | 1        | 1        | 1        | 0.014706 | 1        | 1        | 4.7E-09   | 1.000358 |
| X  | 135481956 | 135481970 | GRP112                 | 1.68E-21 | 2.71E-19 | 0.012256 | 0.016393 | 0.068966 | 1        | 0.000283 | 1        | 1        | 1        | 0.069744 | 0.071429 | 1        | 1.16E-14 | 1.000243  | 0.003243 |
| 2  | 95766553  | 95766567  | MMF35                  | 1.69E-21 | 1.74E-08 | 1        | 1        | 1        | 1        | 1        | 1        | 1        | 1        | 1        | 1        | 1        | 4.39E-20 | 1.26E-07  | 0.001809 |
| 20 | 46270911  | 46270933  | CKOAP                  | 1.89E-21 | 1.14E-21 | 0.16996  | 1        | 0.131689 | 0.007576 | 1        | 1        | 1        | 1        | 0.040688 | 1        | 0.2      | 4.83E-10 | 0.061843  | 0.001146 |
| 14 | 96848565  | 96848580  | SKIP                   | 1.9E-21  | 7.83E-18 | 0.016679 | 1        | 1        | 0.009709 | 0.00004  | 1        | 0.014085 | 0.036864 | 1        | 1        | 1        | 7.52E-14 | 0.045977  | 0.00102  |
| 1  | 182812410 | 182812425 | DH9                    | 2.03E-21 | 5.03E-19 | 1        | 1        | 1        | 1        | 1        | 1        | 1        | 1        | 0.001948 | 1        | 1        | 5.16E-09 | 0.036585  | 0.251576 |
| 20 | 35672436  | 35672456  | RBL1                   | 2.07E-21 | 3.51E-15 | 0.002763 | 1        | 1        | 1        | 1        | 1        | 1        | 1        | 1        | 1        | 1        | 1.71E-28 | 0.055556  | 0.092555 |
| 1  | 63270823  | 63270838  | ATGAC                  | 2.08E-21 | 1.32E-09 | 0.000458 | 1        | 1        | 1        | 1        | 1        | 1        | 1        | 0.051274 | 0.001695 | 1        | 6.75E-14 | 1.081303  | 0.181303 |
| 5  | 125820276 | 125820292 | GRAMD3                 | 2.09E-21 | 6.52E-14 | 0.215686 | 1        | 0.070513 | 0.048276 | 1        | 1        | 0.047238 | 0.065342 | 1        | 1        | 1        | 1.18E-08 | 0.588385  | 0.139569 |
| 16 | 15162143  | 15162165  | PXDCI_LRN3             | 2.19E-21 | 7.31E-11 | 0.00499  | 1        | 1        | 1        | 1        | 0.035294 | 0.035088 | 1        | 1        | 1        | 2.45E-27 | 0.025974 | 0.000766  |          |
| 14 | 54680721  | 54680733  | NSG2                   | 2.19E-21 | 1.26E-13 | 0.008117 | 0.026432 | 1        | 1        | 1        | 1        | 0.070613 | 0.011431 | 1        | 1        | 1        | 0.023895 | 0.010719  | 0.000516 |
| 15 | 63447932  | 63447960  | RPS27L                 | 2.25E-21 | 9.44E-02 | 0.001242 | 1        | 1        | 1        | 1        | 1        | 1        | 1        | 1        | 0.095524 | 1        | 1        | 1.05E-17  | 7.04E-05 |
| 5  | 118500981 | 118501000 | DMX11                  | 2.31E-21 | 5.32E-11 | 0.000578 | 1        | 1        | 1        | 1        | 1        | 1        | 1        | 0.016949 | 0.031045 | 9.03E-28 | 0.000325 | 0.003771  |          |
| 7  | 76883792  | 76883819  | CCD146                 | 2.34E-21 | 3.85E-20 | 0.019608 | 0.009995 | 1        | 1        | 0.045578 | 1        | 0.056738 | 0.016949 | 1        | 1        | 1        | 9.02E-12 | 0.037037  | 0.001184 |
| 4  | 41015553  | 41015566  | ABE2                   | 2.56E-21 | 3.24E-24 | 1        | 1        | 0.259832 | 0.034188 | 0.006231 | 0.009524 | 0.007634 | 5.71E-06 | 0.125    | 0.315789 | 2.49E-12 | 0.04     | 0.000709  |          |
| 12 | 120739962 | 120739978 | CPD1                   | 2.6E-21  | 9.53E-17 | 0.069767 | 0.03     | 0.061211 | 0.107448 | 1        | 1        | 1        | 1        | 0.003703 | 0.066667 | 1        | 2.41E-20 | 1.00205   | 0.00205  |
| 19 | 33408199  | 33408229  | CEP9                   | 2.69E-21 | 1.6E-12  | 0.000499 | 1        | 1        | 1        | 1        | 1        | 0.027778 | 1        | 1        | 1        | 1        | 1.77E-16 | 0.063815  | 0.000293 |
| 20 | 46270911  | 46270933  | CKOAP                  | 2.79E-21 | 1.26E-13 | 0.008117 | 0.027906 | 0.1951   | 0.072787 | 0.018349 | 1        | 0.1448   | 9.6E-07  | 0.121    | 1        | 1        | 3.8E-10  | 0.04      | 0.001809 |
| 15 | 73418741  | 73418756  | NEO1                   | 2.79E-21 | 2.63E-16 | 1        | 1        | 1        | 0.02193  | 0.00885  | 0.017544 | 1.97E-05 | 0.030303 | 1        | 1        | 1        | 1.73E-08 | 0.000639  | 0.000639 |
| 15 | 101019693 | 101019705 | CEB3                   | 3.11E-21 | 7.12E-20 | 0.013495 | 1        | 1        | 1        | 0.001812 | 1        | 0.13072  | 0.034014 | 0.016949 | 1        | 1        | 4.13E-12 | 0.03125   | 0.000142 |
| 7  | 173848186 | 173848214 | RAPGEF4                | 3.24E-21 | 5.55E-15 | 0.107071 | 1        | 0.095562 | 1        | 0.001997 | 1        | 1        | 1        | 0.15149  | 1        | 0.2      | 2.90E-08 | 1.013823  | 0.13823  |
| 3  | 195010023 | 195010035 | ACAP2                  | 3.27E-21 | 1.15E-11 | 1        | 1        | 1        | 1        | 1        | 1        | 1        | 1        | 0.013889 | 1        | 1        | 1.02E-16 | 8.74E-05  | 0.000142 |
| 2  | 220269426 | 220269439 | RNU5F-1                | 3.54E-21 | 2.69E-12 | 0.045455 | 1        | 1        | 0.012121 | 1        | 1        | 1        | 0.036232 | 0.037037 | 1        | 2.89E-10 | 0.050308 | 0.05615   |          |
| 11 | 74000180  | 74000195  | PAH4                   | 3.56E-21 | 0.000104 | 0.0237   | 1        | 1        | 1        | 1        | 1        | 0.111022 | 0.031746 | 1        | 1        | 1        | 4E-14    | 1         | 0.024231 |
| 4  | 16510052  | 16510073  | NSG2                   | 3.58E-21 | 1.95E-30 | 0.00296  | 0.030303 | 0.132445 | 0.039474 | 1        | 1        | 0.035    | 1        | 1        | 1        | 1        | 3.36E-20 | 1         | 0.00368  |
| 2  | 118854094 | 118854108 | INSJ2                  | 3.86E-21 | 3.16E-16 | 0.199373 | 1        | 1        | 0.269527 | 0.000964 | 1        | 0.061762 | 1        | 1        | 0.066667 | 0.045455 | 0.333333 | 1.02E-06  | 0.000639 |
| 1  | 223156384 | 223156419 | DISP1                  | 4.07E-21 | 2.33E-21 | 0.030769 | 1        | 1        | 0.043122 | 0.005988 | 1        | 1        | 4.63E-06 | 0.033333 | 1        | 1        | 4.72E-32 | 0.024691  | 0.002749 |
| 2  | 64195997  | 64196012  | WPS54                  | 4.25E-21 | 1.8E-06  | 0.002246 | 1        | 0.081633 | 1        | 1        | 1        | 0.032967 | 1        | 1        | 0.1875   | 1.08E-20 | 1        | 1.132715  | 1.132715 |
| 4  | 123109034 | 123109048 | KIAM1109               | 4.65E-21 | 2.85E-18 | 0.003484 | 0.020151 | 0.061069 | 1        | 0.033262 | 0.009009 | 1        | 0.036311 | 1        | 1        | 1        | 0.000217 | 1         | 2.25E-05 |
| 9  | 79968285  | 79968309  | WPL3A                  | 4.69E-21 | 5.66E-16 | 1.1E-05  | 1        | 1        | 1        | 1        | 1        | 1        | 0.030769 | 1        | 1        | 1        | 4.5E-25  | 0.063143  | 1        |
| 21 | 37706605  | 37706677  | MORC3                  | 4.72E-21 | 2.01E-24 | 0.000111 | 0.000143 | 0.069231 | 0.084701 | 0.043057 | 1        | 0.028069 | 0.038462 | 0.015625 | 1        | 1        | 1.06E-31 | 1         | 0.052764 |
| 3  | 338193025 | 338193038 | EVY3                   | 4.88E-21 | 1.93E-30 | 0.00096  | 0.017241 | 1        | 0.034884 | 0.017937 | 1        | 0.229961 | 0.030748 | 1        | 1        | 0.133331 | 0.66E-12 | 0.000274  | 0.051863 |
| 3  | 131193153 | 131193168 | KAP1                   | 5.02E-21 | 6.59E-28 | 9.53E-05 | 0.028605 | 0.013314 | 1        | 0.028605 | 0.013314 | 1        | 0.246416 | 0.045455 | 0.333333 | 0.142857 | 3.66E-12 | 0.000274  | 0.051863 |
| 3  | 44815871  | 44815883  | KIF15                  | 5.03E-21 | 3.04E-20 | 0.0833   | 0.005878 | 1        | 0.000958 | 1        | 1        | 1        | 0.051564 | 1        | 1        | 1        | 4.3E-13  | 0.00084   | 0.066327 |
| 11 | 86120270  | 86120294  | CCDC81                 | 5.04E-21 | 2.82E-20 | 0.00106  | 1        | 0.014706 | 0.01105  | 1        | 0.066667 | 1        | 1        | 1        | 1        | 5.05E-16 | 0.127536 | 0.000141  |          |
| 3  | 100438778 | 100438810 | TFG                    | 5.13E-21 | 6.57E-25 | 0.338462 | 0.005208 | 1        | 0.015707 | 1        | 1        | 1        | 1        | 1        | 1        | 6.56E-21 | 0.000301 | 0.028791  |          |
| 5  | 159841492 | 159841507 | SU17                   | 5.28E-21 | 3.2E-22  | 1        | 1        | 0.130466 | 1        | 1        | 0.004717 | 1        | 1        | 0.029851 | 1        | 1        | 5.43E-14 | 1         | 0.0629   |
| 17 | 118164375 | 118164388 | DECI1                  | 5.53E-21 | 5.67E-16 | 0.033898 | 0.024895 | 0.116781 | 1        | 1        | 1        | 1        | 0.025157 | 0.079184 | 1        | 1        | 6.46E-16 | 1         | 4.14E-05 |
| 9  | 17152363  | 17152373  | MEG1                   | 5.58E-21 | 1.5E-12  | 0.000499 | 1        | 1        | 1        | 1        | 1        | 0.003522 | 1        | 1        | 0.133331 | 0.125    | 2.15E-11 | 0.23E-05  | 0.000274 |
| 15 | 59094494  | 59094509  | FAME3B                 | 5.79E-21 | 7.49E-12 | 0.009942 | 0.013333 | 1        | 1        | 1        | 1        | 0.080612 | 0.001587 | 0.357143 | 0.333333 | 1        | 1        | 1.68E-16  | 0.028672 |
| 8  | 53543090  | 53543106  | RBLCC1                 | 6.29E-21 | 8.67E-06 | 5.78E-06 | 1        | 1        | 1        | 1        | 1        | 0.014286 | 1        | 0.017006 | 1        | 1        | 9E-31    | 0.037037  | 0.001666 |
| 7  | 7811876   | 7811889   | CHD3                   | 6.36E-21 | 7.63E-21 | 0.002797 | 1        | 0.21946  | 0.056459 | 1        | 1        | 1        | 0.000808 | 0.038898 | 0.272727 | 2.51E-15 | 1        | 2.45E-06  |          |
| 1  | 22033369  | 22033411  | USP48                  | 6.38E-21 | 9.89E-20 | 7.98E-05 | 0.019563 | 1        | 1        | 1        | 1        | 1        | 0.015873 | 1        | 1        | 6.38E-19 | 1        | 0.003422  |          |
| 5  | 115628120 | 115628134 | COMMD10                | 6.51E-21 | 5.38E-21 | 0.009094 | 0.020153 | 0.415993 | 0.11352  | 0.129116 | 1        | 0.029412 | 0.252552 | 0.069444 | 1        | 1        | 9.69E-07 | 0.01342   | 0.000452 |
| 6  | 18258299  | 18258311  | DEK                    | 6.57E-21 | 3.31E-22 | 0.002885 | 1        | 1        | 0.010638 | 1        | 0.015873 | 0.044643 | 0.014085 | 1        | 1        | 1        | 2.98E-18 | 0.000309  | 0.000694 |
| 12 | 53861636  | 53861650  | PCBP2                  | 6.64E-21 | 5.86E-28 | 1        | 0.014151 | 1        | 0.074442 | 0.000608 | 0.009662 | 1        | 1        | 0.006342 | 1        | 1        | 9.3E-32  | 0.023256  | 0.000694 |
| 14 | 18387471  | 18387488  | NSG2                   | 6.69E-21 | 1.91E-30 | 0.00198  |          |          |          |          |          |          |          |          |          |          |          |           |          |

|    |           |           |                                       |          |          |          |          |          |          |          |          |          |          |          |          |          |          |          |          |
|----|-----------|-----------|---------------------------------------|----------|----------|----------|----------|----------|----------|----------|----------|----------|----------|----------|----------|----------|----------|----------|----------|
| 8  | 97296205  | 97296220  | PTDSS1                                | 5.95E-20 | 2.16E-15 | 0.053684 | 1        | 1        | 1        | 1        | 1        | 0.036197 | 1        | 1        | 1        | 1.14E-22 | 1        | 0.001486 |          |
| 7  | 78936847  | 78936860  | PAPDA                                 | 6.59E-20 | 5.13E-25 | 0.016129 | 1        | 1        | 1        | 1        | 1        | 1        | 0.029412 | 0.001057 | 1        | 1.6E-17  | 1        | 0.002024 |          |
| 3  | 13065386  | 13065399  | ATPC21                                | 6.93E-20 | 6.08E-11 | 0.046154 | 1        | 1        | 1        | 1        | 1        | 0.013333 | 1        | 1        | 1        | 1.06E-17 | 0.05     | 2.03E-05 |          |
| 11 | 73984637  | 73984643  | DMH43                                 | 7.26E-20 | 2.33E-38 | 0.037314 | 1        | 1        | 1        | 1        | 1        | 0.025    | 1        | 1        | 1        | 1.06E-17 | 0.021    | 0.003144 |          |
| 3  | 111873902 | 111873917 | SICPC1                                | 7.56E-20 | 8.99E-15 | 7.18E-05 | 0.044771 | 1        | 0.019248 | 0.244847 | 1        | 1        | 0.028718 | 0.102041 | 0.269841 | 3.01E-27 | 0.057791 | 0.000369 |          |
| 2  | 198267243 | 198267257 | SFB31                                 | 7.67E-20 | 3.52E-19 | 0.095188 | 1        | 1        | 1        | 1        | 1        | 0.017647 | 1        | 1        | 1        | 3.46E-17 | 1        | 1        |          |
| 6  | 18148155  | 18148167  | TPMT                                  | 7.74E-20 | 2.99E-16 | 0.028571 | 1        | 1        | 1        | 1        | 1        | 0.007299 | 1        | 1        | 1        | 1.53E-14 | 0.034483 | 0.114046 |          |
| 14 | 52957731  | 52957750  | TKDCD16                               | 7.79E-20 | 5.39E-09 | 0.003604 | 0.157115 | 1        | 1        | 1        | 1        | 1        | 1        | 1        | 1        | 0.222222 | 1        | 1.06E-27 |          |
| 4  | 44364261  | 44364277  | CDCL5                                 | 8.27E-20 | 1.14E-24 | 1.23E-05 | 1        | 0.047619 | 1        | 1        | 1        | 0.018293 | 1        | 1        | 1        | 3.67E-13 | 0.03125  | 0.004771 |          |
| 11 | 17526254  | 17526267  | USHC1                                 | 8.32E-20 | 2.54E-25 | 0.210526 | 1        | 1        | 1        | 1        | 1        | 0.03065  | 0.016667 | 1        | 1        | 7.27E-07 | 0.065918 | 0.24343  |          |
| 21 | 38498241  | 38498255  | FTC3                                  | 8.66E-20 | 5.44E-16 | 0.037314 | 1        | 1        | 0.093697 | 1        | 1        | 0.000138 | 1        | 0.166667 | 1        | 0.000138 | 0.25714  | 0.000542 |          |
| 9  | 128064242 | 128064260 | GAVD01                                | 8.97E-20 | 5.14E-17 | 0.000803 | 0.00294  | 1        | 1        | 1        | 1        | 0.11288  | 1        | 1        | 1        | 1.24E-16 | 0.037207 | 0.484038 |          |
| 7  | 17446479  | 17446491  | CNTLN1                                | 9.05E-20 | 2.82E-27 | 1        | 0.036807 | 1        | 0.101045 | 0.019231 | 1        | 1        | 0.000128 | 1        | 1        | 2.19E-17 | 0.055936 | 0.041534 |          |
| X  | 108058769 | 108058785 | NPAT                                  | 9.12E-20 | 4.66E-14 | 0.226335 | 1        | 1        | 0.005098 | 1        | 1        | 1        | 1        | 1        | 0.09375  | 1        | 1.02E-26 | 0.011229 |          |
| 11 | 48054294  | 48054306  | SSX5                                  | 9.26E-20 | 1.06E-17 | 1        | 1        | 1        | 0.034856 | 1        | 1        | 0.015625 | 0.046053 | 1        | 1        | 1.63E-13 | 1        | 3.78E-05 |          |
| X  | 22245258  | 22244549  | PHX1                                  | 9.37E-20 | 4.83E-16 | 1        | 0.049484 | 0.111005 | 1        | 1        | 1        | 0.146095 | 0.034483 | 0.000327 | 6.62E-09 | 0.047976 | 0.000616 |          |          |
| 18 | 70532185  | 70532210  | NFET1                                 | 9.55E-20 | 4.88E-06 | 0.133192 | 1        | 1        | 1        | 1        | 1        | 1        | 1        | 1        | 1        | 9.48E-11 | 1        | 2.9E-07  |          |
| 1  | 11694881  | 11694897  | FTAL-AS1                              | 9.86E-20 | 2.23E-37 | 0.125    | 0.171332 | 1        | 0.000501 | 1        | 1        | 1        | 0.088563 | 1        | 1        | 5.98E-06 | 0.034483 | 0.003397 |          |
| 2  | 28464369  | 28464382  | BRE1                                  | 1.01E-19 | 2.31E-05 | 0.050779 | 1        | 1        | 1        | 1        | 1        | 0.039608 | 1        | 1        | 1        | 1.34E-11 | 1        | 0.002953 |          |
| 8  | 3611416   | 36114129  | CSMD1                                 | 1.06E-19 | 1.52E-14 | 0.111801 | 1        | 1        | 1        | 0.079571 | 1        | 1        | 0.038462 | 1        | 1        | 1.84E-29 | 0.033333 | 1.03E-05 |          |
| 10 | 108315599 | 108315615 | ANGPT1                                | 1.07E-19 | 5.04E-22 | 0.234274 | 1        | 1        | 1        | 1        | 1        | 1        | 1        | 1        | 0.052973 | 1        | 3.42E-14 | 7.46E-05 | 0.001027 |
| 12 | 50152601  | 50152618  | TMBIM6                                | 1.14E-19 | 2.59E-11 | 9.77E-05 | 1        | 1        | 1        | 1        | 1        | 1        | 1        | 1        | 1        | 1.31E-22 | 1        | 0.330159 |          |
| 2  | 64069277  | 64069293  | UGP2                                  | 1.15E-19 | 1.35E-27 | 1        | 1        | 0.034314 | 1        | 0.008734 | 0.034932 | 0.099228 | 0.024691 | 1        | 1        | 9.11E-09 | 0.032609 | 1.12E-05 |          |
| 9  | 33280749  | 33280775  | CHMP5                                 | 1.17E-19 | 1.29E-17 | 0.00327  | 0.009852 | 1        | 1        | 1        | 1        | 0.018182 | 0.076308 | 1        | 1        | 5.68E-19 | 0.059988 | 0.040857 |          |
| X  | 2343183   | 2343213   | DHRX3                                 | 1.18E-19 | 5.54E-17 | 4.72E-05 | 0.011905 | 0.023249 | 1        | 1        | 0.024    | 1        | 0.001763 | 1        | 1        | 4.48E-25 | 4.05E-05 | 0.000854 |          |
| 8  | 87680406  | 87680413  | CHMP2                                 | 1.19E-19 | 2.93E-18 | 0.000803 | 0.047801 | 1        | 0.024589 | 1        | 0.037681 | 1        | 0.065918 | 1        | 1        | 3.32E-14 | 0.016393 | 0.000347 |          |
| 3  | 21606027  | 21606040  | ZNF385D-AS1                           | 1.19E-19 | 1.41E-11 | 0.462451 | 0.585977 | 1        | 1        | 1        | 0.304878 | 1        | 0.117647 | 0.035714 | 4.23E-09 | 0.088421 | 1        | 1        |          |
| 2  | 86998651  | 86998676  | RMNDSA                                | 1.21E-19 | 3.22E-12 | 0.101633 | 0.000148 | 0.167625 | 0.00523  | 0.103138 | 1        | 1        | 0.139325 | 1        | 1        | 2.48E-10 | 0.003734 | 0.214399 |          |
| 5  | 94903575  | 94903589  | ARSX                                  | 1.26E-19 | 2.56E-12 | 0.211444 | 0.090524 | 1        | 0.004058 | 1        | 1        | 1        | 0.103898 | 1        | 1        | 2.5E-14  | 0.082224 | 0.024704 |          |
| 13 | 77792099  | 77792113  | MYCBP2                                | 1.32E-19 | 7.85E-19 | 0.038898 | 0.018306 | 0.017282 | 1        | 1        | 1        | 0.052632 | 0.027397 | 1        | 1        | 5.88E-22 | 1        | 2.11E-05 |          |
| 3  | 123332875 | 123332892 | MLX-AS1                               | 1.33E-19 | 1.35E-25 | 0.009307 | 0.023529 | 0.24607  | 0.084462 | 0.04395  | 1        | 1        | 1        | 1        | 0.181818 | 4.19E-21 | 0.104265 | 0.190309 |          |
| 6  | 38905667  | 38905680  | LOC10131047                           | 1.35E-19 | 2.94E-19 | 0.010336 | 1        | 0.043478 | 1        | 1        | 1        | 0.033333 | 1        | 1        | 1        | 1.87E-21 | 0.078919 | 0.000519 |          |
| 7  | 28454081  | 28454094  | CHMP3                                 | 1.35E-19 | 4.16E-15 | 0.076807 | 0.125262 | 1        | 0.039996 | 1        | 1        | 0.001122 | 1        | 1        | 1        | 3.70E-14 | 0.01236  | 0.28E-05 |          |
| 7  | 151884279 | 151884292 | KMTZ7                                 | 1.39E-19 | 1.57E-13 | 0.012097 | 1        | 1        | 0.09296  | 0.004883 | 0.044643 | 0.061856 | 0.028571 | 1        | 1        | 1.33E-14 | 0.034483 | 0.000637 |          |
| 3  | 42660489  | 42660508  | LOC101928323                          | 1.39E-19 | 7.16E-13 | 0.031715 | 1        | 1        | 1        | 1        | 0.059159 | 1        | 0.034884 | 1        | 1        | 6.55E-22 | 0.054045 | 0.002916 |          |
| 14 | 91365646  | 91365664  | RPS6KA5                               | 1.4E-19  | 5.83E-15 | 0.000673 | 0.075581 | 1        | 1        | 1        | 1        | 0.05746  | 1        | 1        | 1        | 1.9E-18  | 1        | 9.75E-08 |          |
| 2  | 114689047 | 114689061 | ACTR3                                 | 1.48E-19 | 1.56E-07 | 0.136185 | 0.035714 | 1        | 1        | 1        | 1        | 0.055164 | 1        | 1        | 9.29E-18 | 0.047976 | 0.001445 |          |          |
| 5  | 7218591   | 72185927  | TNP01                                 | 1.48E-19 | 3.63E-20 | 0.000853 | 1        | 0.08649  | 0.04629  | 0.00463  | 1        | 0.068361 | 1        | 1        | 5.68E-16 | 1        | 0.011015 |          |          |
| 8  | 142161666 | 142161681 | DNMD3                                 | 1.57E-19 | 1.13E-29 | 0.003587 | 0.020253 | 1        | 1        | 0.959309 | 1        | 1        | 1        | 1        | 1        | 1.45E-25 | 0.013699 | 0.003662 |          |
| 12 | 69540861  | 6954094   | CHMP2                                 | 1.58E-19 | 9.26E-13 | 0.000996 | 0.125262 | 1        | 0.039996 | 1        | 0.001122 | 1        | 1        | 1        | 1        | 3.70E-14 | 0.01236  | 0.28E-05 |          |
| 11 | 124624705 | 124624721 | ESAM                                  | 1.6E-19  | 2.03E-28 | 0.029412 | 1        | 0.02057  | 1        | 1        | 0.021127 | 1        | 0.086957 | 1        | 1        | 3.23E-14 | 0.000572 | 1        |          |
| 14 | 32142544  | 32142557  | NUBPL                                 | 1.61E-19 | 2.97E-12 | 0.144944 | 1        | 1        | 0.285337 | 1        | 1        | 1        | 0.001815 | 1        | 1        | 5.76E-26 | 0.026316 | 0.001818 |          |
| 13 | 103257289 | 103257311 | TPP2                                  | 1.62E-19 | 2.25E-22 | 0.01277  | 1        | 0.02649  | 1        | 1        | 0.028986 | 1        | 0.36630  | 0.036145 | 1.68E-05 | 1        | 1        | 1        |          |
| 1  | 148858987 | 148859001 | HP53                                  | 1.64E-19 | 1.89E-21 | 0.043478 | 1        | 0.305593 | 1        | 0.021739 | 1        | 0.027586 | 0.041667 | 0.26087  | 9.28E-14 | 0.144001 | 0.027877 |          |          |
| 9  | 197150249 | 197150268 | ZBTB41                                | 1.68E-19 | 4.21E-18 | 0.010188 | 1        | 0.039106 | 1        | 1        | 0.01626  | 1        | 1        | 1        | 1        | 1.42E-19 | 1        | 0.00221  |          |
| 17 | 45234760  | 45234774  | CDCT7                                 | 1.69E-19 | 5.24E-10 | 0.163647 | 1        | 0.11892  | 0.10281  | 1        | 0.18697  | 1        | 1        | 1        | 1        | 9.78E-17 | 0.2      | 0.001864 |          |
| 11 | 38564590  | 38564635  | FAM18A                                | 1.7E-19  | 4.16E-15 | 0.076807 | 1        | 0.012195 | 1        | 1        | 1        | 1        | 1        | 1        | 1        | 1.31E-17 | 1        | 1        |          |
| 12 | 100496519 | 100496549 | UHFBP1L                               | 1.79E-19 | 9.08E-06 | 3.97E-06 | 1        | 0.093647 | 1        | 1        | 0.045886 | 1        | 0.086957 | 1        | 1        | 3.57E-23 | 0.000104 | 1        |          |
| X  | 153357614 | 153357628 | MECP2                                 | 1.75E-19 | 5.46E-17 | 0.090909 | 0.10643  | 0.125995 | 0.020548 | 1        | 1        | 0.001905 | 0.086957 | 1        | 1        | 5.63E-14 | 0.000644 | 0.000394 |          |
| 19 | 46206021  | 46206037  | OPCTL                                 | 1.75E-19 | 2.83E-16 | 0.421739 | 1        | 1        | 1        | 1        | 0.038645 | 0.045977 | 1        | 1        | 1        | 1.27E-11 | 1        | 0.019851 |          |
| 7  | 66039938  | 66039951  | KPN2A                                 | 1.78E-19 | 3.37E-30 | 0.04918  | 0.015625 | 0.205044 | 0.182717 | 0.067063 | 1        | 0.00885  | 1        | 1        | 1        | 1.23E-19 | 0.000784 | 0.35E-27 |          |
| X  | 106028279 | 106028291 | RNF128                                | 1.8E-19  | 3.93E-23 | 1        | 0.10939  | 0.091321 | 1        | 1        | 0.027523 | 0.002392 | 1        | 1        | 1        | 4.78E-16 | 0.067398 | 1.55E-05 |          |
| 12 | 8528920   | 8528938   | SLC6A15                               | 1.8E-19  | 8.25E-19 | 4.63E-06 | 0.311836 | 0.245428 | 1        | 1        | 1        | 1        | 0.02381  | 0.003096 | 2.36E-18 | 1        | 1        | 1        |          |
| 5  | 93294851  | 93294871  | IRX2A                                 | 1.8E-19  | 5.13E-28 | 0.03125  | 0.02216  | 1        | 0.02926  | 0.031556 | 1        | 0.011405 | 1        | 1        | 1        | 1.01E-14 | 1        | 0.001085 |          |
| 6  | 24513330  | 24513331  | ALDH5A1                               | 1.8E-19  | 1.11E-12 | 0.25178  | 1        | 1        | 1        | 1        | 0.021127 | 1        | 0.086957 | 1        | 1        | 1.04E-28 | 0.018692 | 0.013381 |          |
| 14 | 21964623  | 21964635  | TOXA                                  | 2.06E-19 | 3.09E-14 | 1        | 1        | 0.031913 | 1        | 0.013423 | 1        | 0.000466 | 1        | 1        | 1        | 1.49E-23 | 1        | 1.60E    |          |
| 5  | 58270446  | 58270485  | PD4D                                  | 2.17E-19 | 3.13E-23 | 5.69E-05 | 1        | 1        | 1        | 0.009756 | 1        | 0.297572 | 1        | 1        | 1        | 5.58E-06 | 1        | 0.015383 |          |
| 2  | 232025952 | 23202597  | PSMD1                                 | 2.32E-19 | 2.79E-08 | 0.147905 | 1        | 1        | 1        | 1        | 0.02749  | 0.000539 | 1        | 1        | 1        | 4.49E-11 | 1        | 0.031946 |          |
| 6  | 11714639  | 11714665  | ADRP1                                 | 2.32E-19 | 2.6E-09  | 0.000115 | 1        | 1        | 1        | 1        | 0.041663 | 1        | 0.238095 | 6.33E-27 | 1        | 0.001321 | 1        | 1        |          |
| 17 | 45105631  | 45105644  | RPMML(dlist=49017),ARL17A(dlist=3308) | 2.36E-19 | 5.13E-20 | 1        | 0.166364 | 0.009615 | 0.000552 | 1        | 0.019608 | 0.046765 | 1        | 1        | 1        | 1.98E-15 | 0.000649 | 0.003885 |          |
| 6  | 119296378 | 119296390 | FAM18A                                | 2.42E-19 | 3.03E-07 | 1        | 0.036585 | 1        | 1        | 1        | 1        | 0.01374  | 1        | 1        | 1        | 9.57E-12 | 0.308823 | 1        |          |
| 10 | 45909023  | 45909034  | C4orf46                               | 2.49E-19 | 2.76E-13 | 0.062040 | 1        | 0.048774 | 0.02786  | 1        | 0.048774 | 0.02786  | 1        | 1        | 1        | 0.045455 | 1        | 3.9E-05  |          |
| 6  | 158049351 | 158049365 | ZDHHC14                               | 2.49E-19 | 1.56E-19 | 1        | 0.08602  | 1        | 0.104075 | 1        | 0.042254 | 0.132565 | 0.019608 | 0.2      | 1.04E-18 | 0.001317 | 0.000707 |          |          |
| 2  | 234178624 | 234178640 | ACTL16L1                              | 2.61E-19 | 2.57E-30 | 0.003301 | 0.032488 | 0.138664 | 0.079562 | 1        | 0.00233  | 0.106944 | 0.016129 | 1        | 1        | 1.4E-14  | 0.028037 | 0.04505  |          |

|    |           |           |                                        |          |          |           |          |          |          |          |          |          |           |          |          |          |          |          |          |          |          |
|----|-----------|-----------|----------------------------------------|----------|----------|-----------|----------|----------|----------|----------|----------|----------|-----------|----------|----------|----------|----------|----------|----------|----------|----------|
| 12 | 110834030 | 110834049 | ANAPC7                                 | 1.25E-18 | 2.99E-14 | 2.25E-06  | 1        | 0.039683 | 1        | 1        | 1        | 1        | 0.012195  | 1        | 0.166667 | 1        | 1        | 1.85E-34 | 0.025641 | 0.219596 |          |
| 12 | 43726277  | 43726290  | ADAMT50                                | 1.28E-17 | 1.21E-22 | 0.171007  | 0.039116 | 1        | 0.004427 | 1        | 1        | 1        | 0.028069  | 0.122328 | 1        | 1        | 1        | 1.85E-34 | 0.025641 | 0.219596 |          |
| 10 | 101124157 | 101124170 | CNNM1                                  | 1.35E-18 | 6.92E-12 | 0.146683  | 1        | 1        | 1        | 1        | 1        | 1        | 1         | 0.101633 | 1        | 1        | 1        | 1.85E-34 | 0.025641 | 0.219596 |          |
| X  | 18805831  | 18805835  | PR3                                    | 1.35E-18 | 1.89E-05 | 0.000838  | 0.009615 | 1        | 1        | 1        | 1        | 1        | 1         | 0.473846 | 1        | 1        | 1        | 1.85E-34 | 0.025641 | 0.219596 |          |
| 4  | 17841869  | 17841881  | NCAPG                                  | 1.46E-18 | 6.82E-29 | 0.000504  | 0.020887 | 1        | 0.083795 | 0.066058 | 0.004587 | 0.019608 | 1         | 1        | 1        | 1        | 1        | 1.85E-34 | 0.025641 | 0.219596 |          |
| 2  | 173435578 | 173435593 | PKD1                                   | 1.47E-18 | 1.43E-06 | 0.006721  | 1        | 1        | 1        | 1        | 1        | 1        | 1         | 1        | 1        | 1        | 1        | 1.85E-34 | 0.025641 | 0.219596 |          |
| 7  | 94740524  | 94740538  | PPP1R9A                                | 1.48E-18 | 7.07E-18 | 0.001739  | 1        | 1        | 1        | 1        | 1        | 1        | 1         | 0.084181 | 0.090909 | 4.34E-15 | 0.037778 | 0.012377 | 0.156832 |          |          |
| 2  | 98866980  | 98866995  | VWA3B                                  | 1.67E-18 | 5.07E-16 | 0.008737  | 1        | 0.124872 | 0.080775 | 1        | 1        | 1        | 0.0125    | 0.000161 | 0.027027 | 1        | 1        | 1.85E-34 | 0.025641 | 0.219596 |          |
| 2  | 135703650 | 135703664 | CNN2                                   | 1.69E-18 | 2.87E-21 | 0.050847  | 1        | 1        | 1        | 1        | 1        | 1        | 1         | 0.038462 | 0.020833 | 1        | 1        | 1        | 1.85E-34 | 0.025641 | 0.219596 |
| 11 | 134072616 | 134072632 | NCAPD3                                 | 1.75E-18 | 4E-12    | 0.054054  | 1        | 1        | 1        | 1        | 1        | 1        | 1         | 0.073257 | 1        | 1        | 1        | 1.85E-34 | 0.025641 | 0.219596 |          |
| 8  | 107740921 | 107740935 | DWR1B                                  | 1.76E-18 | 6.68E-20 | 0.009678  | 0.009615 | 0.105188 | 1        | 1        | 1        | 1        | 1         | 1.17E-18 | 0.000452 | 1        | 1        | 1        | 1.85E-34 | 0.025641 | 0.219596 |
| 1  | 12330939  | 12330953  | WFS13D                                 | 1.87E-18 | 5.72E-12 | 0.004862  | 1        | 0.042324 | 0.000483 | 1        | 1        | 1        | 1         | 0.059988 | 1        | 1        | 1        | 1.85E-34 | 0.025641 | 0.219596 |          |
| 7  | 66489771  | 66489787  | TYY1                                   | 1.92E-18 | 2.48E-06 | 0.085714  | 1        | 0.121617 | 1        | 1        | 1        | 1        | 1         | 0.017699 | 1        | 1        | 1        | 1.85E-34 | 0.025641 | 0.219596 |          |
| 12 | 69980447  | 69980462  | CCT2                                   | 1.94E-18 | 1.82E-17 | 0.052281  | 1        | 1        | 0.0199   | 0.038458 | 1        | 1        | 1         | 1        | 1        | 1        | 1        | 1.85E-34 | 0.025641 | 0.219596 |          |
| 7  | 112555294 | 112555307 | C7orf60                                | 1.95E-18 | 1.83E-12 | 1         | 1        | 0.06     | 1        | 0.011407 | 1        | 1        | 1         | 1        | 1        | 1        | 1        | 1.85E-34 | 0.025641 | 0.219596 |          |
| 4  | 52928352  | 52928371  | SPA1A18                                | 1.98E-18 | 2.7E-26  | 0.011888  | 0.002125 | 0.408639 | 0.019488 | 0.05475  | 1        | 0.015349 | 2.62E-06  | 0.069767 | 1        | 1        | 1        | 2.49E-05 | 1        | 0.053034 |          |
| 1  | 35885037  | 35885058  | ZMM4                                   | 2.04E-18 | 1.85E-23 | 1         | 1        | 1        | 0.033333 | 1        | 1        | 1        | 1         | 1        | 1        | 1        | 1        | 1.85E-34 | 0.025641 | 0.219596 |          |
| 12 | 69042454  | 69042468  | NCPD1B                                 | 2.06E-18 | 1.93E-07 | 0.123912  | 1        | 1        | 1        | 1        | 1        | 1        | 0.030534  | 0.034483 | 0.001242 | 1        | 1        | 1        | 1.85E-34 | 0.025641 | 0.219596 |
| 5  | 70937260  | 70937275  | BDF1                                   | 2.11E-18 | 2.5E-29  | 0.004707  | 1        | 1        | 1        | 1        | 1        | 1        | 1         | 0.060606 | 1        | 1        | 1        | 1.85E-34 | 0.025641 | 0.219596 |          |
| 14 | 45330466  | 45330477  | FCD1(dist=353967),C14orf28(dist=36030) | 2.12E-18 | 2.67E-07 | 0.055556  | 0.015625 | 0.069307 | 1        | 1        | 1        | 1        | 0.082116  | 0.181818 | 0.156111 | 0.067398 | 1        | 1        | 1.85E-34 | 0.025641 | 0.219596 |
| 4  | 38937316  | 38937329  | FAM114A1                               | 2.13E-18 | 6.35E-14 | 0.035088  | 1        | 0.075682 | 0.009479 | 1        | 1        | 1        | 0.052796  | 1        | 1        | 1        | 1        | 1.85E-34 | 0.025641 | 0.219596 |          |
| X  | 16761748  | 16761764  | SYAP1                                  | 2.14E-18 | 2.22E-20 | 0.249012  | 1        | 1        | 1        | 1        | 1        | 1        | 1         | 1        | 1        | 1        | 1        | 1.85E-34 | 0.025641 | 0.219596 |          |
| 10 | 35242702  | 35242726  | BAZ1A                                  | 2.19E-18 | 0.000477 | 0.000335  | 1        | 0.160967 | 1        | 1        | 1        | 1        | 1         | 1        | 1        | 1        | 1        | 1.85E-34 | 0.025641 | 0.219596 |          |
| 20 | 36431202  | 36431215  | CNTN1B1                                | 2.19E-18 | 9.81E-34 | 0.155556  | 1        | 0.042254 | 0.008053 | 0.000514 | 1        | 1        | 0.505E-05 | 1        | 1        | 1        | 1        | 1.85E-34 | 0.025641 | 0.219596 |          |
| 12 | 96379650  | 96379675  | HAL                                    | 2.2E-18  | 6.16E-11 | 0.032258  | 0.017344 | 1        | 1        | 1        | 1        | 1        | 1         | 1        | 1        | 1        | 1        | 1.85E-34 | 0.025641 | 0.219596 |          |
| 11 | 121720518 | 121720531 | FAM118                                 | 2.23E-18 | 3.86E-13 | 0.199417  | 0.044843 | 0.05937  | 0.018727 | 1        | 1        | 1        | 1         | 0.142873 | 0.191717 | 1        | 1        | 1        | 1.85E-34 | 0.025641 | 0.219596 |
| 3  | 17200381  | 17200385  | FNC3B                                  | 2.23E-18 | 8.68E-12 | 1         | 1        | 0.192962 | 0.188125 | 1        | 1        | 1        | 1         | 0.085714 | 1        | 1        | 1        | 1.85E-34 | 0.025641 | 0.219596 |          |
| 8  | 104075165 | 104075177 | ATPGV1C1                               | 2.52E-18 | 2.99E-23 | 0.000481  | 1        | 0.039801 | 1        | 1        | 1        | 1        | 0.0119291 | 1        | 1        | 1        | 1        | 1.85E-34 | 0.025641 | 0.219596 |          |
| 18 | 18588229  | 18588257  | ROCK1                                  | 2.52E-18 | 1.19E-09 | 0.001402  | 1        | 1        | 1        | 1        | 1        | 1        | 0.007937  | 1        | 1        | 1        | 0.214286 | 1.33E-08 | 0.179218 | 1.34558  |          |
| 17 | 58013510  | 58013529  | PRF58K1                                | 2.56E-18 | 8.53E-16 | 0.044776  | 0.01     | 1        | 1        | 1        | 1        | 1        | 0.068945  | 1        | 1        | 1        | 1        | 1.85E-34 | 0.025641 | 0.219596 |          |
| 14 | 88407716  | 88407730  | GALC                                   | 2.72E-18 | 2.99E-28 | 0.030769  | 1        | 0.285337 | 0.058515 | 1        | 1        | 1        | 0.110512  | 0.002031 | 0.166667 | 0.166667 | 9.78E-06 | 1        | 0.038217 |          |          |
| 2  | 222902623 | 222902655 | EPH4A                                  | 2.74E-18 | 1.17E-14 | 0.119998  | 0.005747 | 1        | 0.011236 | 0.038001 | 1        | 1        | 0.019291  | 1        | 1        | 1        | 1        | 1.85E-34 | 0.025641 | 0.219596 |          |
| 10 | 8171345   | 8171346   | EPH4B                                  | 2.74E-18 | 6.88E-13 | 0.000708  | 0.004635 | 0.004635 | 1        | 1        | 1        | 1        | 0.049938  | 0.000255 | 1        | 1        | 1        | 1.85E-34 | 0.025641 | 0.219596 |          |
| 1  | 65138787  | 65138801  | CACHD1                                 | 2.77E-18 | 4.85E-25 | 0.015336  | 0.027874 | 0.379795 | 1        | 1        | 1        | 1        | 0.000684  | 1        | 0.000571 | 9.66E-05 | 0.175084 | 1.59E-11 | 0.00925  | 0.553866 |          |
| 19 | 37721404  | 37721419  | ZNF383                                 | 2.79E-18 | 2.14E-09 | 1         | 1        | 1        | 1        | 0.030928 | 1        | 1        | 0.006897  | 1        | 1        | 1        | 1        | 1.85E-34 | 0.025641 | 0.219596 |          |
| 1  | 47581121  | 47581151  | CYP241                                 | 3E-18    | 2.5E-06  | 0.002162  | 0.0125   | 1        | 1        | 1        | 1        | 1        | 0.013699  | 1        | 1        | 1        | 1        | 1.85E-34 | 0.025641 | 0.219596 |          |
| 2  | 33402334  | 33402352  | RNF19B                                 | 3.07E-18 | 4.77E-20 | 0.763E-05 | 0.095511 | 0.194207 | 1        | 1        | 1        | 1        | 0.0151492 | 1        | 1        | 1        | 1        | 1.85E-34 | 0.025641 | 0.219596 |          |
| 2  | 211179765 | 211179777 | MYL1                                   | 3.1E-18  | 1.17E-26 | 0.109254  | 0.020134 | 1        | 0.079334 | 0.000453 | 1        | 0.013699 | 1.59E-06  | 0.045455 | 1        | 1        | 1        | 1.85E-34 | 0.025641 | 0.219596 |          |
| 2  | 230658987 | 23065901  | TRIP12                                 | 3.12E-18 | 1.2E-24  | 0.001129  | 0.027906 | 1        | 0.016484 | 1        | 1        | 1        | 0.019608  | 1        | 1        | 0.272727 | 2.74E-24 | 0.117647 | 0.000121 |          |          |
| 5  | 45132245  | 45132259  | GABRI1B                                | 3.12E-18 | 4.86E-18 | 0.044118  | 1        | 1        | 1        | 1        | 1        | 1        | 1         | 1        | 1        | 1        | 1        | 1.85E-34 | 0.025641 | 0.219596 |          |
| 2  | 62063093  | 62063111  | FAM161A                                | 3.24E-18 | 1.54E-30 | 0.001329  | 0.070485 | 0.591131 | 0.310812 | 0.122474 | 1        | 1        | 1.59E-06  | 0.069444 | 1        | 1        | 1        | 1.85E-34 | 0.025641 | 0.219596 |          |
| 11 | 33374613  | 33374626  | HPK3                                   | 3.26E-18 | 9.48E-21 | 0.00752   | 0.077267 | 1        | 1        | 0.072125 | 0.022222 | 0.26786  | 1         | 1        | 1        | 1        | 1        | 1.85E-34 | 0.025641 | 0.219596 |          |
| 7  | 55016354  | 55016369  | COL                                    | 3.27E-18 | 4.83E-18 | 0.049684  | 0.073529 | 1        | 0.047612 | 1        | 1        | 1        | 0.05      | 1        | 1        | 1        | 1        | 1.85E-34 | 0.025641 | 0.219596 |          |
| 10 | 12226870  | 12226882  | NUD5                                   | 3.38E-18 | 1.83E-11 | 0.000171  | 1        | 1        | 1        | 0.050732 | 1        | 1        | 1         | 1        | 1        | 1        | 0.214286 | 4.36E-19 | 0.024096 | 0.000415 |          |
| 17 | 58289521  | 58289533  | USP32                                  | 3.39E-18 | 6.04E-09 | 9.38E-05  | 1        | 1        | 1        | 1        | 1        | 1        | 0.008065  | 1        | 0.333333 | 1.18E-20 | 1        | 1        | 1.85E-34 | 0.025641 | 0.219596 |
| 1  | 63128836  | 63128850  | DOCK7                                  | 3.41E-18 | 1.63E-28 | 8.35E-05  | 0.052464 | 1        | 1        | 1        | 1        | 1        | 1         | 1        | 1        | 1        | 1        | 1.85E-34 | 0.025641 | 0.219596 |          |
| 2  | 46868268  | 46868273  | TRIR12                                 | 3.5E-18  | 1.86E-20 | 0.001544  | 0.004695 | 1        | 1        | 1        | 1        | 1        | 0.007874  | 1        | 0.05     | 1        | 1        | 1        | 1.85E-34 | 0.025641 | 0.219596 |
| 4  | 4813535   | 4813538   | MUT1                                   | 3.51E-18 | 2.84E-27 | 0.945E-05 | 0.04958  | 0.0025   | 0.04958  | 0.02564  | 0.014184 | 1        | 1         | 1        | 1        | 1        | 1        | 1.85E-34 | 0.025641 | 0.219596 |          |
| 5  | 145647187 | 145647210 | RBM27                                  | 3.7E-18  | 6.14E-25 | 3.42E-05  | 1        | 1        | 1        | 1        | 1        | 1        | 1         | 1        | 1        | 1        | 1        | 1.85E-34 | 0.025641 | 0.219596 |          |
| 12 | 112289576 | 112289599 | SCL35A5                                | 3.71E-18 | 5.73E-07 | 0.041096  | 1        | 1        | 1        | 1        | 1        | 1        | 0.021277  | 1        | 0.421053 | 1.13E-18 | 0.043478 | 0.006614 | 1.35986  |          |          |
| X  | 135080623 | 135080653 | SCL36A                                 | 3.77E-18 | 8.53E-17 | 0.222856  | 1        | 0.142032 | 0.000393 | 0.176891 | 1        | 0.011536 | 0.018868  | 0.529231 | 4.05E-19 | 0.294142 | 0.405077 | 1.450577 | 5E-06    |          |          |
| 5  | 7745712   | 77457152  | SCAMP1                                 | 3.81E-18 | 7.28E-22 | 1         | 1        | 1        | 1        | 0.000256 | 1        | 1        | 1         | 1        | 1        | 1        | 1        | 1.85E-34 | 0.025641 | 0.219596 |          |
| 12 | 123703074 | 123703086 | MPH0SPH9                               | 3.87E-18 | 3.21E-27 | 4.27E-05  | 0.018823 | 1        | 0.089056 | 0.051164 | 1        | 0.03     | 1         | 0.018519 | 1        | 1        | 1        | 1.85E-34 | 0.025641 | 0.219596 |          |
| 8  | 2818022   | 2818023   | TRIP12                                 | 3.9E-18  | 2.94E-27 | 0.000114  | 1        | 0.011645 | 0.000263 | 1        | 1        | 0.028888 | 1         | 0.025641 | 1        | 1        | 1        | 1.85E-34 | 0.025641 | 0.219596 |          |
| 1  | 10985829  | 10985849  | SOX11                                  | 4.22E-18 | 4.38E-12 | 0.030769  | 1        | 0.05511  | 0.004275 | 1        | 1        | 1        | 0.05084   | 1        | 1        | 1        | 1        | 1.85E-34 | 0.025641 | 0.219596 |          |
| 6  | 37328387  | 37328414  | RNF8                                   | 4.23E-18 | 2.79E-05 | 0.113122  | 1        | 1        | 1        | 1        | 1        | 1        | 1         | 1        | 1        | 1        | 1        | 1.85E-34 | 0.025641 | 0.219596 |          |
| 2  | 24789116  | 24789134  | DNAH5                                  | 4.27E-18 | 2.9E-18  | 0.009231  | 1        | 1        | 0.004665 | 1        | 1        | 1        | 0.034483  | 1        | 1        | 1        | 1        | 1.85E-34 | 0.025641 | 0.219596 |          |
| X  | 3238003   | 3238028   | MKRN8                                  | 4.27E-18 | 7.59E-09 | 0.032787  | 1        | 0.060606 | 1        | 0.039604 | 1        | 1        | 1         | 1        | 1        | 1        | 1        | 1.85E-34 | 0.025641 | 0.219596 |          |
| 9  | 86920104  | 86920135  | SCL28A3                                | 4.32E-18 | 4.29E-09 | 0.007974  | 0.01474  | 1        | 1        | 1        | 1        | 0.040265 | 1         | 0.047899 | 1        | 1        | 1        | 1.85E-34 | 0.025641 | 0.219596 |          |
| 12 | 110925982 | 110925995 |                                        |          |          |           |          |          |          |          |          |          |           |          |          |          |          |          |          |          |          |

|    |           |           |                                          |          |          |          |          |          |          |          |          |          |          |          |          |          |          |          |   |          |          |          |   |   |          |
|----|-----------|-----------|------------------------------------------|----------|----------|----------|----------|----------|----------|----------|----------|----------|----------|----------|----------|----------|----------|----------|---|----------|----------|----------|---|---|----------|
| 22 | 40755427  | 40755439  | ADSL                                     | 1.61E-17 | 8.83E-09 | 0.000117 | 1        | 1        | 1        | 1        | 1        | 1        | 1        | 1        | 1        | 1        | 1        | 1        | 1 | 0.01325  | 0.263158 | 1.47E-16 | 1 | 1 | 0.003753 |
| 16 | 31196218  | 31196237  | FUS                                      | 1.63E-17 | 7.46E-23 | 1        | 0.008658 | 0.04555  | 0.04     | 0.019157 | 1        | 1        | 1        | 0.002408 | 1        | 1        | 1        | 1        | 1 | 1        | 1        | 1        | 1 | 1 | 0.000301 |
| 1  | 21593101  | 21593195  | USHA2                                    | 1.63E-17 | 7.98E-16 | 0.157614 | 1        | 1        | 0.089056 | 1        | 1        | 1        | 1        | 1        | 1        | 1        | 1        | 1        | 1 | 1        | 1        | 1        | 1 | 1 | 1        |
| 19 | 21845521  | 21845531  | LR                                       | 1.63E-17 | 0.000000 | 0.000000 | 0.007611 | 0.143899 | 1        | 1        | 1        | 1        | 1        | 0.008266 | 1        | 1        | 1        | 1        | 1 | 1        | 1        | 1        | 1 | 1 | 0.09305  |
| 4  | 20706067  | 20706080  | PACRGL                                   | 1.68E-17 | 3.95E-12 | 0.063492 | 1        | 1        | 1        | 1        | 1        | 1        | 1        | 1        | 1        | 1        | 1        | 1        | 1 | 1        | 1        | 1        | 1 | 1 | 0.058835 |
| 8  | 109462215 | 109462229 | EMC2                                     | 1.72E-17 | 1.08E-23 | 2.69E-05 | 1        | 1        | 1        | 1        | 1        | 1        | 1        | 1        | 1        | 1        | 1        | 1        | 1 | 1        | 1        | 1        | 1 | 1 | 0.169605 |
| 11 | 16117684  | 16117698  | SOX6                                     | 1.76E-17 | 2.06E-24 | 0.133192 | 1        | 1        | 1        | 1        | 1        | 1        | 0.02749  | 1        | 1        | 1        | 1        | 1        | 1 | 1        | 1        | 1        | 1 | 1 | 0.97706  |
| 10 | 101992923 | 101992938 | CWF19L1                                  | 1.81E-17 | 1.71E-31 | 0.002262 | 1        | 1        | 1        | 1        | 1        | 1        | 1        | 0.088517 | 0.000754 | 1        | 1        | 1        | 1 | 1        | 1        | 1        | 1 | 1 | 0.000802 |
| 11 | 107518175 | 107518187 | ELMOD1                                   | 1.82E-17 | 4.86E-16 | 0.006697 | 1        | 1        | 1        | 1        | 1        | 1        | 1        | 0.005689 | 0.000512 | 1        | 1        | 1        | 1 | 1        | 1        | 1        | 1 | 1 | 0.000267 |
| 12 | 112519594 | 112519596 | NAAT25                                   | 1.93E-17 | 2.57E-14 | 0.037975 | 1        | 1        | 0.012987 | 1        | 1        | 1        | 1        | 1        | 1        | 1        | 1        | 1        | 1 | 1        | 1        | 1        | 1 | 1 | 0.005145 |
| 18 | 59842745  | 59842748  | LRCA458                                  | 1.95E-17 | 3.07E-08 | 0.004118 | 1        | 0.257945 | 1        | 1        | 1        | 1        | 1        | 0.013986 | 1        | 1        | 1        | 1        | 1 | 0.385965 | 1        | 1        | 1 | 1 | 0.001006 |
| 14 | 36218039  | 36218056  | NALGAIPA                                 | 1.97E-17 | 2.8E-17  | 1.23E-05 | 1        | 1        | 1        | 1        | 1        | 1        | 1        | 1        | 1        | 1        | 1        | 1        | 1 | 1        | 1        | 1        | 1 | 1 | 9.45E-06 |
| 17 | 53014442  | 53014457  | TOM1L1                                   | 2.02E-17 | 7.4E-02  | 0.003623 | 0.02459  | 0.010755 | 0.083636 | 0.110596 | 1        | 1        | 1        | 0.131212 | 4.39E-05 | 0.064516 | 1        | 1        | 1 | 1        | 1        | 1        | 1 | 1 | 0.003948 |
| 15 | 43927623  | 43927636  | CATSPER2                                 | 2.02E-17 | 1.69E-29 | 1        | 1        | 1        | 1        | 1        | 1        | 1        | 1        | 0.025723 | 0.047945 | 0.028571 | 1        | 1        | 1 | 1        | 1        | 1        | 1 | 1 | 0.009283 |
| 2  | 21226218  | 21226230  | AP08                                     | 2.06E-17 | 6.85E-24 | 0.013495 | 0.011299 | 0.006266 | 0.000176 | 0.00302  | 1        | 1        | 1        | 0.016393 | 0.033893 | 0.1      | 1        | 1        | 1 | 1        | 1        | 1        | 1 | 1 | 0.00157  |
| 17 | 5044640   | 50446453  | USP6                                     | 2.11E-17 | 4.06E-11 | 0.037736 | 0.008197 | 1        | 1        | 1        | 1        | 1        | 1        | 0.043161 | 0.000206 | 1        | 1        | 1        | 1 | 1        | 1        | 1        | 1 | 1 | 0.026645 |
| 13 | 107910327 | 107910342 | IF57                                     | 2.14E-17 | 1.83E-21 | 0.262724 | 1        | 0.005865 | 0.167582 | 1        | 1        | 1        | 1        | 1        | 0.000726 | 1        | 1        | 1        | 1 | 1        | 1        | 1        | 1 | 1 | 0.000649 |
| 12 | 25678995  | 25679008  | LMWTD1                                   | 2.14E-17 | 4.33E-18 | 0.013733 | 1        | 0.189624 | 1        | 1        | 1        | 1        | 0.00869  | 0.032673 | 0.010362 | 0.000529 | 0.227273 | 1        | 1 | 1        | 1        | 1        | 1 | 1 | 0.001229 |
| X  | 128817905 | 128817919 | PLK4                                     | 2.15E-17 | 2.78E-34 | 0.107071 | 1        | 1        | 1        | 1        | 1        | 1        | 1        | 0.037556 | 1        | 1        | 0.033898 | 1        | 1 | 1        | 1        | 1        | 1 | 1 | 4.56E-06 |
| X  | 100793432 | 100793449 | ARMCKX(dist=42634).ARMCKX1(dist=12065)   | 2.2E-17  | 4.34E-14 | 0.020158 | 1        | 0.520925 | 0.044607 | 0.002878 | 1        | 1        | 1        | 0.023651 | 0.006747 | 1        | 1        | 1        | 1 | 1        | 1        | 1        | 1 | 1 | 0.000726 |
| 3  | 50112589  | 50112605  | RRM6                                     | 2.25E-17 | 5.45E-15 | 1        | 0.022472 | 1        | 1        | 1        | 1        | 1        | 1        | 0.014388 | 0.043474 | 1        | 1        | 1        | 1 | 1        | 1        | 1        | 1 | 1 | 0.002803 |
| X  | 67741418  | 67741434  | YIPF6                                    | 2.29E-17 | 2.84E-08 | 0.076923 | 1        | 1        | 1        | 1        | 1        | 1        | 1        | 0.105263 | 1        | 1        | 1        | 1        | 1 | 1        | 1        | 1        | 1 | 1 | 0.000321 |
| 5  | 108168451 | 108168468 | LR                                       | 2.33E-17 | 2.12E-11 | 0.006807 | 1        | 0.264543 | 1        | 1        | 1        | 1        | 0.010811 | 1        | 0.141361 | 0.060606 | 1        | 1        | 1 | 1        | 1        | 1        | 1 | 1 | 0.055556 |
| 22 | 17063605  | 17063619  | OR11H1(dist=613801).CC18L2(dist=8029)    | 2.39E-17 | 4.2E-16  | 0.015618 | 0.035294 | 1        | 1        | 1        | 1        | 1        | 1        | 1        | 1        | 1        | 1        | 1        | 1 | 1        | 1        | 1        | 1 | 1 | 0.055556 |
| 9  | 69127139  | 69127155  | PGM5F2                                   | 2.45E-17 | 6.54E-12 | 0.002177 | 1        | 0.046074 | 1        | 1        | 1        | 1        | 1        | 1        | 1        | 1        | 1        | 1        | 1 | 1        | 1        | 1        | 1 | 1 | 0.009994 |
| 14 | 40470621  | 40470623  | LR                                       | 2.45E-17 | 6.54E-12 | 0.002177 | 1        | 1        | 0.043057 | 0.04512  | 1        | 1        | 1        | 0.058284 | 1        | 0.21568  | 0.12109  | 1        | 1 | 1        | 1        | 1        | 1 | 1 | 0.007327 |
| 3  | 37611414  | 37611428  | LRN12                                    | 2.72E-17 | 1.76E-18 | 0.103383 | 1        | 0.113783 | 0.003518 | 0.066506 | 1        | 1        | 1        | 0.087457 | 0.071429 | 1        | 1        | 1        | 1 | 1        | 1        | 1        | 1 | 1 | 0.001297 |
| 7  | 26247984  | 26247997  | CBX3                                     | 2.73E-17 | 4.95E-17 | 0.127869 | 1        | 0.0375   | 1        | 0.095562 | 1        | 1        | 1        | 0.008547 | 0.052083 | 0.00085  | 1        | 1        | 1 | 1        | 1        | 1        | 1 | 1 | 0.08105  |
| 8  | 17422434  | 17422446  | SLC7A2                                   | 2.76E-17 | 1.97E-16 | 0.041667 | 0.000686 | 0.062548 | 0.0625   | 1        | 1        | 1        | 1        | 0.018182 | 1        | 1        | 1        | 1        | 1 | 1        | 1        | 1        | 1 | 1 | 0.000651 |
| 16 | 10567751  | 10567778  | ATFP12                                   | 2.76E-17 | 2.32E-06 | 6.14E-06 | 1        | 1        | 1        | 1        | 1        | 1        | 1        | 1        | 1        | 1        | 1        | 1        | 1 | 1        | 1        | 1        | 1 | 1 | 0.1999   |
| 12 | 28412398  | 28412416  | CCD91                                    | 2.83E-17 | 7.22E-13 | 0.000486 | 1        | 0.053846 | 0.057471 | 1        | 1        | 1        | 1        | 0.007937 | 1        | 1        | 1        | 1        | 1 | 1        | 1        | 1        | 1 | 1 | 0.003177 |
| 4  | 74285182  | 74285210  | ALB                                      | 2.83E-17 | 5.48E-11 | 0.012356 | 1        | 0.057554 | 1        | 1        | 1        | 1        | 1        | 1        | 1        | 1        | 1        | 1        | 1 | 1        | 1        | 1        | 1 | 1 | 0.031339 |
| 11 | 328317915 | 328317919 | PLK4                                     | 2.85E-17 | 2.78E-34 | 0.107071 | 0.011173 | 1        | 1        | 1        | 1        | 1        | 1        | 0.024767 | 1        | 0.02702  | 1        | 1        | 1 | 1        | 1        | 1        | 1 | 1 | 0.004695 |
| 17 | 20639183  | 20639199  | LOC100287072                             | 2.91E-17 | 0.004902 | 0.142669 | 1        | 1        | 1        | 1        | 1        | 1        | 1        | 0.001142 | 0.241379 | 8.76E-16 | 0.032256 | 0.000138 | 1 | 1        | 1        | 1        | 1 | 1 | 0.000638 |
| 6  | 163235158 | 163235170 | PACRG                                    | 2.93E-17 | 8.56E-19 | 0.069767 | 0.005263 | 0.284936 | 1        | 0.001037 | 1        | 1        | 1        | 0.015267 | 0.006891 | 1        | 1        | 1        | 1 | 1        | 1        | 1        | 1 | 1 | 0.004304 |
| 15 | 34168207  | 34168221  | AVEN                                     | 2.94E-17 | 1.19E-10 | 1        | 1        | 1        | 1        | 1        | 1        | 1        | 1        | 1        | 1        | 1        | 1        | 1        | 1 | 1        | 1        | 1        | 1 | 1 | 0.004056 |
| 13 | 53239754  | 53239767  | SUGT1                                    | 3.04E-17 | 1.08E-14 | 0.086207 | 1        | 0.015038 | 0.03012  | 1        | 1        | 1        | 1        | 0.022727 | 1        | 3.46E-14 | 0.033333 | 0.017581 | 1 | 1        | 1        | 1        | 1 | 1 | 0.000154 |
| 12 | 88926290  | 88926302  | KITLG                                    | 3.06E-17 | 1.7E-15  | 0.006466 | 1        | 0.019961 | 0.088191 | 0.086157 | 1        | 1        | 1        | 0.025641 | 1        | 0.015873 | 1        | 1        | 1 | 1        | 1        | 1        | 1 | 1 | 0.001514 |
| 13 | 80095130  | 80095156  | NDFP2                                    | 3.1E-17  | 6.8E-15  | 0.047619 | 1        | 0.071406 | 1        | 1        | 1        | 1        | 1        | 1        | 1        | 1        | 1        | 1        | 1 | 1        | 1        | 1        | 1 | 1 | 0.000427 |
| 18 | 68690765  | 68690777  | LRN12                                    | 3.13E-17 | 2.1E-12  | 0.032781 | 1        | 1        | 1        | 1        | 1        | 1        | 1        | 0.018349 | 0.007546 | 1        | 1        | 1        | 1 | 1        | 1        | 1        | 1 | 1 | 0.001071 |
| 20 | 18511458  | 18511473  | SFC23B                                   | 3.31E-17 | 6.56E-16 | 0.001998 | 1        | 1        | 0.049254 | 1        | 1        | 1        | 1        | 1        | 1        | 1        | 1        | 1        | 1 | 1        | 1        | 1        | 1 | 1 | 0.000963 |
| 14 | 147628705 | 147628716 | ITC29                                    | 3.34E-17 | 2.08E-08 | 0.308943 | 1        | 1        | 0.024315 | 1        | 1        | 1        | 1        | 0.070175 | 1        | 1        | 1        | 1        | 1 | 1        | 1        | 1        | 1 | 1 | 6.02E-05 |
| 11 | 18591715  | 18591730  | JEVD                                     | 3.44E-17 | 6.78E-14 | 1        | 1        | 1        | 1        | 1        | 1        | 1        | 1        | 0.136364 | 0.1      | 1.06E-14 | 0.073171 | 0.062881 | 1 | 1        | 1        | 1        | 1 | 1 | 0.000811 |
| 10 | 7684120   | 7684123   | ITH5                                     | 3.46E-17 | 1.49E-13 | 0.078125 | 1        | 1        | 0.032785 | 1        | 1        | 1        | 1        | 1        | 1        | 1        | 1        | 1        | 1 | 1        | 1        | 1        | 1 | 1 | 0.003244 |
| 12 | 97306603  | 97306631  | NEPD1                                    | 3.47E-17 | 1.32E-13 | 0.002063 | 1        | 1        | 1        | 1        | 1        | 1        | 1        | 0.008475 | 1        | 0.001207 | 1        | 1        | 1 | 1        | 1        | 1        | 1 | 1 | 0.001001 |
| 14 | 56078699  | 56078713  | KTNI                                     | 3.5E-17  | 5.36E-10 | 0.126618 | 1        | 1        | 0.045796 | 1        | 1        | 1        | 1        | 0.026549 | 1        | 0.001107 | 1        | 1        | 1 | 1        | 1        | 1        | 1 | 1 | 0.001832 |
| 11 | 120346128 | 120346148 | LRN12                                    | 3.52E-17 | 9.87E-08 | 0.022147 | 1        | 1        | 1        | 1        | 1        | 1        | 1        | 1        | 1        | 1        | 1        | 1        | 1 | 1        | 1        | 1        | 1 | 1 | 0.003686 |
| 4  | 181757691 | 18175784  | CACNA1E                                  | 3.57E-17 | 6.15E-08 | 1        | 1        | 1        | 0.035714 | 0.002134 | 0.032258 | 0.143281 | 0.000224 | 0.024691 | 1        | 1        | 1        | 1        | 1 | 1        | 1        | 1        | 1 | 1 | 0.224922 |
| 2  | 56611386  | 56611398  | CCDC85A                                  | 3.69E-17 | 5.66E-17 | 0.25946  | 0.021917 | 0.012664 | 1        | 1        | 1        | 1        | 1        | 1        | 0.001169 | 0.03125  | 1        | 1        | 1 | 1        | 1        | 1        | 1 | 1 | 0.15495  |
| 2  | 10187764  | 10187775  | KLF11                                    | 3.79E-17 | 1.97E-16 | 1        | 1        | 1        | 0.058522 | 1        | 1        | 1        | 1        | 1        | 0.007313 | 1        | 1        | 1        | 1 | 1        | 1        | 1        | 1 | 1 | 0.004886 |
| 18 | 67614674  | 67614695  | CD226                                    | 4.09E-17 | 6.39E-17 | 0.000578 | 1        | 1        | 0.006663 | 1        | 1        | 1        | 1        | 0.182449 | 0.069767 | 0.416667 | 1.47E-17 | 1        | 1 | 1        | 1        | 1        | 1 | 1 | 0.002888 |
| 11 | 49883922  | 49883985  | LOC440040(dist=52003).OR4C13(dist=89958) | 4.12E-17 | 1.2E-11  | 0.001344 | 0.042662 | 1        | 0.234693 | 0.062485 | 1        | 1        | 1        | 0.097969 | 1        | 1        | 1        | 1        | 1 | 1        | 1        | 1        | 1 | 1 | 0.002814 |
| 1  | 236714292 | 236714311 | HEATR1                                   | 4.19E-17 | 5.32E-09 | 0.05102  | 1        | 1        | 1        | 1        | 1        | 1        | 1        | 1        | 1        | 1        | 1        | 1        | 1 | 1        | 1        | 1        | 1 | 1 | 0.003924 |
| 1  | 25607366  | 25607378  | LR                                       | 4.2E-17  | 1.48E-21 | 0.002347 | 0.006329 | 1        | 1        | 0.024641 | 1        | 1        | 1        | 1        | 1        | 1        | 1        | 1        | 1 | 1        | 1        | 1        | 1 | 1 | 0.000413 |
| 12 | 98989187  | 98989199  | SLC25A3                                  | 4.22E-17 | 1.6E-19  | 1        | 0.017977 | 1        | 0.018868 | 1        | 1        | 1        | 1        | 0.031229 | 1        | 1        | 1        | 1        |   |          |          |          |   |   |          |





|    |           |           |               |          |          |          |          |          |          |          |          |          |          |          |          |          |          |          |          |          |          |
|----|-----------|-----------|---------------|----------|----------|----------|----------|----------|----------|----------|----------|----------|----------|----------|----------|----------|----------|----------|----------|----------|----------|
| 8  | 62550924  | 62550938  | ASPH          | 1.49E-15 | 6.5E-29  | 0.001364 | 0.02046  | 1        | 1        | 1        | 1        | 0.008658 | 0.015385 | 1        | 1        | 1        | 2.76E-22 | 0.110262 | 0.038123 |          |          |
| 13 | 147120444 | 147120470 | ZICA          | 1.53E-15 | 1.08E-16 | 0.00565  |          | 1        | 1        | 1        | 0.058238 | 1        | 1        | 0.087912 | 1        | 1        | 1        | 1.49E-10 | 1        | 0.009352 |          |
| 17 | 38451739  | 38451755  | CDCE          | 1.55E-15 | 5.78E-14 | 0.04918  |          | 1        | 1        | 0.029412 | 1        | 1        | 1        | 0.041667 | 1        | 1        | 1        | 2.4E+16  | 1        | 0.014777 |          |
| 7  | 13782593  | 13782597  | AKR11         | 1.55E-15 | 1.06E-04 | 0.007493 |          | 1        | 0.068376 | 0.11812  | 1        | 1        | 1        | 0.017544 | 1        | 0.03125  | 0.333333 | 0.029412 | 0.05     | 0.054493 |          |
| 8  | 42789394  | 42789409  | HOOK3         | 1.56E-15 | 6.21E-17 | 1        | 1        | 1        | 1        | 1        | 1        | 0.031871 | 0.009524 | 1        | 1        | 1        | 1        | 6.98E-10 | 1        | 9.85E-07 |          |
| 15 | 45028919  | 45028931  | TRIM69        | 1.56E-15 | 1.1E-08  | 1        | 1        | 1        | 0.574975 | 1        | 0.129353 | 1        | 0.202329 | 0.001326 | 1        | 1        | 1        | 1        | 6.81E-06 | 1        | 0.034297 |
| 5  | 60170512  | 60170537  | ERC8          | 1.61E-15 | 8.17E-11 | 0.002347 |          | 1        | 0.034483 | 1        | 1        | 1        | 1        | 0.016393 | 1        | 1        | 1        | 2.19E+15 | 1        | 4.97E-05 |          |
| 8  | 30954244  | 30954280  | WRN           | 1.61E-15 | 1.7E-09  | 0.025997 |          | 1        | 1        | 1        | 1        | 1        | 1        | 0.045108 | 1        | 1        | 1        | 1        | 0.006117 | 1        | 0.060317 |
| 20 | 44429633  | 44429646  | DNTTP1        | 1.66E-15 | 2.21E-09 | 0.08951  |          | 1        | 1        | 1        | 0.020725 | 1        | 1        | 1        | 1        | 0.25     | 0.209609 | 0.021978 | 0.228297 | 1        |          |
| X  | 54042926  | 54042942  | PHRF          | 1.67E-15 | 1.16E-11 | 1        | 1        | 1        | 0.04918  | 1        | 1        | 1        | 1        | 0.333333 | 1        | 1        | 1        | 2.58E-07 | 1        | 0.000116 |          |
| 10 | 40150104  | 40150123  | CDCE          | 1.68E-15 | 2.3E-14  | 0.04634  | 0.009174 | 0.071895 | 1        | 1        | 1        | 1        | 1        | 0.000213 | 1        | 1        | 1        | 9.43E-04 | 1        | 0.029412 |          |
| 10 | 40871690  | 40871737  | SH3BR8        | 1.68E-15 | 4.34E-10 | 0.001442 |          | 1        | 1        | 1        | 1        | 1        | 1        | 0.015625 | 1        | 1        | 1        | 5.8E-10  | 0.037037 | 0.066519 |          |
| 5  | 138704323 | 138704348 | PAIP2_SLC23A1 | 1.71E-15 | 1.76E-07 | 0.044118 |          | 1        | 1        | 1        | 1        | 1        | 1        | 0.033898 | 1        | 1        | 1        | 2.3E+10  | 1        | 0.032722 |          |
| 12 | 21644428  | 21644447  | RECLQ         | 1.74E-15 | 1.54E-11 | 0.006368 |          | 1        | 1        | 1        | 1        | 1        | 1        | 0.0625   | 1        | 1        | 1        | 6.91E+26 | 1        | 0.158201 |          |
| 11 | 22296604  | 22296106  | ANOS          | 1.75E-15 | 1.21E-25 | 0.370448 | 0.466731 | 0.076889 | 1        | 1        | 1        | 1        | 1        | 1        | 0.142857 | 0.172857 | 0.357143 | 0.000591 | 1        | 0.000591 |          |
| 2  | 172582088 | 172582125 | DYNC112       | 1.8E-15  | 9.12E-05 | 1        | 1        | 1        | 1        | 1        | 1        | 1        | 1        | 0.062004 | 0.142857 | 0.317828 | 0.035714 | 0.161057 | 1        | 1        |          |
| 5  | 101574897 | 101574911 | SLC04C1       | 1.83E-15 | 1.17E-15 | 0.006765 | 0.116388 | 1        | 0.081593 | 1        | 1        | 1        | 1        | 0.104082 | 1        | 1        | 0.222222 | 1.12E+17 | 1        | 0.048305 |          |
| 3  | 138341284 | 138341300 | FAIM          | 1.85E-15 | 1.65E-06 | 0.009336 | 0.093023 | 1        | 1        | 0.11812  | 1        | 1        | 1        | 1        | 1        | 1        | 1        | 4.01E-10 | 0.172016 | 0.054299 |          |
| 12 | 44074070  | 44074103  | ERCAF6        | 1.92E-15 | 3.04E-08 | 0.002346 |          | 1        | 1        | 1        | 1        | 1        | 1        | 1        | 0.391304 | 2.82E-18 | 1        | 0.001195 | 1        | 1        |          |
| 2  | 217329413 | 217329447 | SMARCAL1      | 1.93E-15 | 5.57E-17 | 0.006061 | 0.009804 | 0.123429 | 1        | 1        | 1        | 1        | 1        | 1        | 1        | 1        | 1        | 1        | 5.08E-06 | 1        | 0.005342 |
| 20 | 13695824  | 13695839  | ESF1          | 2.04E-15 | 7.82E-07 | 0.010053 | 1        | 1        | 1        | 0.017241 | 1        | 1        | 1        | 1        | 1        | 1        | 1        | 4.94E-12 | 1        | 0.267699 |          |
| 12 | 88566358  | 88566370  | TWTC3         | 2.06E-15 | 3.5E-21  | 1        | 1        | 1        | 0.01875  | 1        | 1        | 1        | 1        | 0.044688 | 0.003634 | 0.024048 | 1        | 4.64E-09 | 1        | 0.348272 |          |
| 3  | 179298584 | 179298597 | ACTL6A        | 2.06E-15 | 1.47E-10 | 0.118305 | 1        | 1        | 0.001237 | 1        | 1        | 1        | 0.015152 | 1        | 0.024484 | 0.007692 | 6.98E-16 | 1        | 0.063463 |          |          |
| 2  | 55863360  | 55863372  | PNNP1         | 2.1E-15  | 2.93E-09 | 0.355556 | 0.071429 | 1        | 1        | 0.0122   | 1        | 1        | 1        | 0.240001 | 0.034483 | 0.125    | 1.21E-11 | 1        | 4.8E-05  |          |          |
| 4  | 122590883 | 122590959 | ANKAS         | 2.17E-15 | 1.47E-18 | 0.003507 |          | 1        | 1        | 0.082311 | 0.039526 | 1        | 1        | 0.003852 | 0.030303 | 1        | 2.92E+15 | 1        | 0.095174 |          |          |
| 3  | 97116656  | 97116693  | TRIM2         | 2.18E-15 | 3.06E-14 | 6.44E-05 | 0.052287 | 0.045045 | 1        | 1        | 1        | 1        | 1        | 0.014815 | 0.161206 | 1        | 1        | 1        | 0.055556 | 0.054993 |          |
| 16 | 72832618  | 72832635  | ZFHK3         | 2.26E-15 | 8.48E-21 | 0.003953 | 1        | 1        | 0.127113 | 1        | 1        | 1        | 1        | 1        | 1        | 1        | 1        | 3.14E-14 | 0.034483 | 0.065201 |          |
| 19 | 11411997  | 11412010  | TSPAN16       | 2.29E-15 | 1.54E-23 | 0.004525 | 0.009259 | 1        | 0.004043 | 1        | 1        | 1        | 0.018692 | 1        | 1        | 1        | 1        | 6.36E-17 | 1        | 9.36E-05 |          |
| 17 | 66904031  | 66904045  | ABC08         | 2.3E-15  | 5.71E-12 | 0.000725 | 1        | 0.184111 | 1        | 1        | 1        | 1        | 0.070401 | 0.1      | 1        | 1        | 2.12E-13 | 0.029412 | 0.005419 |          |          |
| 14 | 39619587  | 39619599  | TRAPCC6B      | 2.31E-15 | 4.43E-10 | 0.066667 |          | 1        | 1        | 0.047332 | 1        | 1        | 1        | 1        | 1        | 1        | 1        | 0.000144 | 0.021987 | 0.006801 |          |
| 11 | 108014684 | 108014704 | ACAT1         | 2.32E-15 | 3.72E-10 | 0.00339  | 0.065    | 0.226366 | 0.160926 | 0.169518 | 0.015075 | 1        | 0.256522 | 0.047074 | 1        | 1        | 2.13E-08 | 0.020928 | 0.002392 |          |          |
| 5  | 56197331  | 56197344  | SARP          | 2.32E-15 | 2.59E-08 | 1        | 1        | 1        | 0.02168  | 1        | 1        | 1        | 1        | 0.033898 | 1        | 1        | 1        | 0.003815 | 0.02439  | 0.267533 |          |
| 12 | 25012941  | 25012953  | ERLUR         | 2.32E-15 | 3.48E-11 | 0.018487 | 0.039377 | 1        | 1        | 1        | 1        | 1        | 1        | 1        | 1        | 1        | 1        | 1        | 1        | 0.005419 |          |
| 4  | 123374811 | 123374832 | IL2           | 2.38E-15 | 6.69E-10 | 0.02223  | 1        | 1        | 0.021186 | 1        | 1        | 1        | 0.024    | 0.007482 | 1        | 1        | 1        | 1        | 1.27E-07 | 1        | 0.003045 |
| 10 | 90676384  | 90676397  | STAMPB1       | 2.42E-15 | 4.58E-12 | 0.027778 | 1        | 1        | 0.05042  | 1        | 1        | 1        | 0.025641 | 1        | 0.375    | 1.76E+15 | 1        | 0.002865 | 1        | 1        |          |
| 17 | 80430359  | 80430375  | NARF          | 2.44E-15 | 1.29E-12 | 0.142857 | 0.059159 | 0.251675 | 1        | 1        | 1        | 1        | 1        | 0.044444 | 1        | 1        | 1        | 8.97E-05 | 1        | 0.207652 |          |
| 6  | 155109168 | 155109189 | SCAF8         | 2.5E-15  | 1.81E-19 | 0.004152 | 1        | 1        | 0.054635 | 1        | 0.005556 | 1        | 1        | 0.018182 | 1        | 1        | 1        | 1.7E-12  | 1        | 0.059764 |          |
| 22 | 42415224  | 42415240  | WBP2NL        | 2.52E-15 | 1.51E-20 | 8.1E-05  | 0.007785 | 1        | 1        | 1        | 1        | 1        | 1        | 1        | 1        | 1        | 1        | 1.49E-15 | 1        | 7.35E-05 |          |
| 3  | 38257551  | 38257583  | DXSR1         | 2.55E-15 | 3.78E-10 | 0.000636 | 1        | 1        | 1        | 1        | 1        | 1        | 1        | 1        | 1        | 1        | 1        | 6.71E-24 | 1        | 1.84E-07 |          |
| 9  | 43037634  | 43037649  | NSM4L1        | 2.59E-15 | 3.08E-15 | 0.006135 | 1        | 1        | 1        | 1        | 1        | 1        | 1        | 1        | 1        | 1        | 1        | 2.93E-09 | 2.4E-05  | 0.004634 |          |
| 5  | 50054546  | 50054573  | PARP8         | 2.6E-15  | 5.2E-20  | 0.00549  | 1        | 0.174337 | 1        | 0.153002 | 1        | 1        | 0.070588 | 1        | 0.940077 | 0.22222  | 8.17E-24 | 1        | 0.003161 |          |          |
| 14 | 21936762  | 21936776  | RAB2B         | 2.65E-15 | 2.38E-21 | 0.04     | 0.011657 | 0.099451 | 1        | 1        | 1        | 1        | 1        | 0.059701 | 1        | 1        | 1        | 5.6E-20  | 1        | 0.36563  |          |
| 7  | 73666736  | 73666750  | RFC2          | 2.65E-15 | 1.95E-24 | 1        | 0.026431 | 0.068027 | 0.001716 | 0.047611 | 1        | 0.032387 | 0.003497 | 1        | 1        | 1        | 3.83E-11 | 1        | 1.9E-07  |          |          |
| 3  | 42599049  | 42599064  | SEC2C         | 2.7E-15  | 4.95E-18 | 0.004442 | 1        | 1        | 0.004934 | 1        | 1        | 1        | 0.062242 | 0.018668 | 1        | 1        | 1        | 1.37E-14 | 0.071429 | 1        |          |
| 13 | 134626034 | 134626049 | CALD1         | 2.75E-15 | 2.61E-19 | 0.199457 | 1        | 1        | 0.116388 | 0.020061 | 0.008621 | 0.038213 | 1        | 1        | 0.136364 | 2.41E-18 | 1        | 0.002535 | 1        | 1        |          |
| 12 | 106219995 | 106219999 | SNX31         | 2.75E-15 | 1.4E-18  | 0.120237 | 1        | 1        | 1        | 1        | 1        | 1        | 0.04142  | 1        | 1        | 1        | 6.73E-15 | 1        | 0.000791 |          |          |
| 5  | 460138723 | 460138736 | TRAF1B        | 2.78E-15 | 2.86E-15 | 0.010686 | 1        | 1        | 0.045855 | 1        | 1        | 0.015385 | 0.03     | 0.016949 | 1        | 1        | 1        | 6.7E+13  | 1        | 0.345819 |          |
| 8  | 97116656  | 97116693  | NEO1          | 2.81E-15 | 3.48E-11 | 1        | 0.409703 | 0.057787 | 1        | 1        | 1        | 0.039474 | 0.015385 | 0.1      | 0.120588 | 0.9E-19  | 1        | 0.003014 | 1        | 1        |          |
| 12 | 104066176 | 104066191 | CEPTE         | 2.81E-15 | 5.86E-22 | 0.003279 | 1        | 0.176099 | 1        | 1        | 1        | 0.050308 | 0.000402 | 1        | 1        | 1        | 2.49E-19 | 0.026316 | 0.04417  |          |          |
| 4  | 51323672  | 51323684  | NEN1A         | 2.82E-15 | 4.71E-35 | 0.030303 | 0.01087  | 1        | 0.03947  | 0.059955 | 0.018868 | 1        | 0.16615  | 0.047619 | 0.145738 | 1        | 1        | 1        | 1        | 1        |          |
| X  | 134708007 | 134708023 | DDX26B        | 2.83E-15 | 7.58E-11 | 1        | 1        | 1        | 1        | 1        | 1        | 1        | 0.039683 | 1        | 1        | 1        | 2.89E-15 | 1        | 0.005195 |          |          |
| 5  | 94206957  | 94206971  | MCTP1         | 2.84E-15 | 6.99E-05 | 0.138274 | 0.123144 | 0.012987 | 0.063987 | 1        | 1        | 1        | 0.052632 | 1        | 1        | 1        | 4.2E-13  | 0.022727 | 0.026844 |          |          |
| 7  | 81695842  | 81695859  | CACNA2D1      | 2.89E-15 | 1.32E-14 | 8.46E-05 | 1        | 1        | 1        | 1        | 1        | 1        | 0.015385 | 1        | 1        | 1        | 4.96E-24 | 0.025316 | 0.242627 |          |          |
| 15 | 44842211  | 44842214  | SNRPB         | 2.9E-15  | 1.57E-15 | 0.010686 | 1        | 1        | 1        | 1        | 1        | 1        | 1        | 1        | 1        | 1        | 1        | 2.33E-08 | 1        | 0.005517 |          |
| 13 | 24410499  | 24410511  | MRPEP         | 2.92E-15 | 1.54E-18 | 0.074074 | 0.067901 | 0.034653 | 1        | 1        | 1        | 0.036142 | 1        | 1        | 1        | 1        | 9.1E-06  | 1        | 0.000148 |          |          |
| 3  | 43385025  | 43385042  | SNRK          | 2.93E-15 | 6.83E-07 | 1        | 1        | 1        | 1        | 1        | 1        | 1        | 1        | 1        | 1        | 1        | 1        | 3.23E-08 | 0.034483 | 1        |          |
| 5  | 37027560  | 37027590  | NIPBL         | 2.96E-15 | 3.33E-14 | 0.000308 | 1        | 1        | 1        | 1        | 1        | 1        | 1        | 0.063987 | 1        | 1        | 1        | 3.03E-25 | 1        | 1        |          |
| 2  | 208611699 | 208611735 | CNVL1         | 3.04E-15 | 6.06E-12 | 0.109524 | 1        | 1        | 1        | 1        | 1        | 0.02439  | 0.1875   | 1.35E-08 | 0.067212 | 0.001258 | 1        | 0.001568 |          |          |          |
| 13 | 33637913  | 33637928  | KL            | 3.06E-15 | 4.51E-12 | 0.002484 | 0.192278 | 0.018593 | 0.004101 | 1        | 0.053563 | 0.392164 | 0.010989 | 1        | 1        | 1        | 2.25E-11 | 1        | 0.001267 |          |          |
| 12 | 57882764  | 57882777  | MARS          | 3.1E-15  | 1.46E-27 | 1        | 1        | 1        | 0.049682 | 1        | 1        | 1        | 1.17E-05 | 1        | 1        | 1        | 5.12E+15 | 1        | 0.051402 |          |          |
| 7  | 72159280  | 72159382  | TWY13         | 3.21E-15 | 2.22E-12 | 0.118415 | 1        | 1        | 1        | 1        | 1        | 0.021978 | 1        | 1        | 1        | 1        | 4.34E-16 | 0.001604 | 0.002132 |          |          |
| 6  | 10027763  | 10027779  | ANKB3         | 3.27E-15 | 3.18E-17 | 1        | 1        | 1        | 1        | 1        | 1        | 1        | 7.75E-05 | 1        | 1        | 1        | 7.1E-09  | 1        | 0.000294 |          |          |
| 16 | 21809188  | 21809208  | RNR3P1        |          |          |          |          |          |          |          |          |          |          |          |          |          |          |          |          |          |          |



|    |           |           |                                   |          |          |          |          |          |          |          |          |          |          |          |          |          |          |          |          |          |          |
|----|-----------|-----------|-----------------------------------|----------|----------|----------|----------|----------|----------|----------|----------|----------|----------|----------|----------|----------|----------|----------|----------|----------|----------|
| 9  | 135133867 | 135133881 | NTNG2(dist=15647).SETX(dist=2946) | 7.31E-14 | 3.04E-10 | 0.025441 | 1        | 1        | 1        | 1        | 0.019608 | 0.09853  | 1        | 0.020408 | 0.090909 | 7.55E-11 | 0.136185 | 0.292701 |          |          |          |
| 12 | 3018675   | 3018690   | TULP3                             | 7.45E-14 | 1.13E-11 | 0.017501 | 1        | 0.122778 | 0.35987  | 0.031659 | 1        | 1        | 4.44E-06 | 0.05     | 0.014706 | 2.45E-08 | 1        | 0.022485 |          |          |          |
| 1  | 78432647  | 78432669  | FUBP1                             | 7.48E-14 | 1.55E-06 | 1        | 1        | 1        | 1        | 1        | 1        | 0.038462 | 1        | 1        | 1        | 1.57E-10 | 0.026316 | 0.009098 |          |          |          |
| 1  | 38453294  | 38453313  | TPY111                            | 7.52E-14 | 1.16E-08 | 1        | 1        | 1        | 1        | 1        | 1        | 1        | 1        | 1        | 0.004782 | 1        | 1        | 1.001945 |          |          |          |
| 3  | 130660392 | 130660405 | ATPC21                            | 7.55E-14 | 7.67E-13 | 1        | 1        | 0.018365 | 1        | 1        | 1        | 1        | 1        | 1        | 0.035714 | 1        | 1.12E-18 | 0.001025 | 9.26E-05 |          |          |
| 11 | 57094842  | 57094869  | SSRP1                             | 7.78E-14 | 1.2E-24  | 0.078431 | 1        | 0.058065 | 0.047238 | 0.035211 | 1        | 0.047899 | 8.51E-05 | 1        | 1        | 1.42E-08 | 0.011905 | 0.154594 |          |          |          |
| 7  | 103270629 | 103270641 | RELN                              | 7.88E-14 | 1.19E-13 | 0.001815 | 1        | 1        | 1        | 1        | 1        | 0.040265 | 1        | 1        | 1        | 1        | 5.46E-08 | 1        | 0.019669 |          |          |
| 2  | 27463091  | 27463105  | CAD                               | 7.94E-14 | 1.67E-26 | 0.01     | 0.009434 | 1        | 0.002714 | 0.057681 | 1        | 1        | 1        | 0.020096 | 1        | 1        | 2.03E-12 | 7.31E-05 | 0.01232  |          |          |
| 7  | 37487307  | 37487320  | PKRKB3                            | 8.1E-14  | 1.65E-14 | 0.008202 | 1        | 1        | 1        | 1        | 1        | 0.008929 | 1        | 0.027397 | 1        | 1        | 1.67E-08 | 0.001899 | 1.52E-05 |          |          |
| 8  | 9549206   | 9549231   | KIAA1429                          | 8.13E-14 | 5.7E-13  | 1        | 0.056738 | 0.053691 | 0.02765  | 1        | 1        | 1        | 1        | 1        | 1        | 1        | 2.19E-10 | 1        | 0.008596 |          |          |
| 5  | 43549620  | 43549634  | PCAD5                             | 8.24E-14 | 2.16E-15 | 0.181423 | 1        | 0.03371  | 0.4081   | 0.0291   | 1        | 0.041915 | 1        | 0.085714 | 1        | 1        | 3.05E-08 | 0.02623  | 0.001945 |          |          |
| 7  | 106889846 | 106889877 | ZOG5                              | 8.75E-14 | 4.55E-21 | 0.003953 | 1        | 0.015    | 0.041667 | 5.13E-06 | 1        | 0.016807 | 2.33E-06 | 1        | 1        | 1        | 7.67E-09 | 0.001025 | 0.000551 |          |          |
| 2  | 11716433  | 11716447  | GSRB1                             | 8.75E-14 | 5.96E-16 | 1        | 0.015152 | 1        | 1        | 1        | 1        | 0.034333 | 0.052633 | 0.019231 | 1        | 1        | 1        | 9.37E-10 | 0.026316 | 8.89E-05 |          |
| 2  | 80101515  | 80101528  | CTNNA2                            | 8.77E-14 | 5.11E-22 | 1        | 1        | 0.041428 | 0.168462 | 0.023256 | 1        | 1        | 1        | 0.176471 | 1        | 1        | 1        | 1.08E-08 | 0.121951 | 0.075472 |          |
| 12 | 21639385  | 21639398  | RECLD                             | 9.33E-14 | 2.19E-15 | 0.112824 | 1        | 1        | 0.289463 | 0.032609 | 1        | 0.032787 | 1        | 0.044444 | 0.039526 | 6.69E-16 | 0.128422 | 0.000447 |          |          |          |
| 17 | 15973417  | 15973449  | NCR01                             | 9.36E-14 | 8.37E-30 | 0.031346 | 1        | 0.26571  | 1        | 1        | 1        | 1        | 1        | 1        | 1        | 1        | 1        | 1.17E-08 | 0.02381  | 0.148907 |          |
| 21 | 43549808  | 43549820  | UMODL1                            | 9.57E-14 | 7.01E-17 | 0.041489 | 1        | 0.000964 | 1        | 1        | 1        | 1        | 1        | 1        | 1        | 1        | 1        | 2.14E-09 | 1        | 0.137111 |          |
| 11 | 118883880 | 11888392  | CCDC84                            | 9.63E-14 | 5.12E-26 | 0.055556 | 1        | 1        | 0.026738 | 1        | 1        | 0.066372 | 0.025974 | 1        | 1        | 1        | 1        | 1.03E-20 | 1        | 0.001945 |          |
| 9  | 91083260  | 91083278  | SRN11                             | 9.67E-14 | 9.71E-05 | 3.03E-05 | 1        | 0.592274 | 0.235936 | 1        | 1        | 0.066667 | 1        | 0.079699 | 1        | 1        | 1        | 1.58E-15 | 0.022727 | 0.002597 |          |
| 4  | 68443006  | 68443018  | STAP1                             | 9.68E-14 | 1.09E-08 | 0.002797 | 1        | 1        | 1        | 1        | 1        | 1        | 1        | 1        | 1        | 1        | 1        | 1.58E-15 | 0.022727 | 0.002597 |          |
| 5  | 158630629 | 158630653 | RNF145                            | 9.88E-14 | 1.85E-11 | 0.058824 | 1        | 0.128514 | 0.001055 | 0.015936 | 1        | 1        | 1        | 1        | 1        | 1        | 1        | 0.000231 | 1        | 0.109502 |          |
| 1  | 198711160 | 198711197 | PTPRC                             | 1E-13    | 3.11E-09 | 0.009614 | 1        | 0.051724 | 1        | 1        | 1        | 1        | 1        | 1        | 1        | 1        | 1        | 1.47E-17 | 0.042105 | 1        |          |
| 3  | 178962491 | 178962504 | KCNMB3                            | 1.02E-13 | 4.49E-15 | 0.030488 | 0.053147 | 1        | 1        | 1        | 0.055739 | 0.092613 | 1        | 0.461538 | 1        | 1        | 1        | 2.3E-18  | 1        | 0.051809 |          |
| 12 | 42768646  | 42768660  | PHLNL1                            | 1.02E-13 | 2.95E-16 | 0.213505 | 0.009804 | 1        | 1        | 1        | 1        | 1        | 1        | 1        | 1        | 1        | 1        | 2.61E-14 | 0.03125  | 0.001737 |          |
| 12 | 94575201  | 94575219  | PLXNC1                            | 1.03E-13 | 9.16E-49 | 1        | 1        | 0.076169 | 0.000143 | 1        | 0.023256 | 0.046358 | 0.035714 | 0.454545 | 1        | 1        | 1        | 4.76E-17 | 0.000861 | 0.004149 |          |
| 1  | 243746210 | 243746213 | ITPR1                             | 1.23E-13 | 3.85E-04 | 0.125    | 1        | 0.004263 | 1        | 1        | 0.026515 | 0.07487  | 1        | 1        | 1        | 1        | 1        | 3.75E-14 | 0.001835 | 1        |          |
| 2  | 99721804  | 99721820  | TSGA10                            | 1.03E-13 | 2.88E-15 | 1        | 0.023529 | 1        | 1        | 5.44E-05 | 1        | 1        | 1        | 1        | 1        | 1        | 1        | 3E-22    | 0.065201 | 0.010939 |          |
| 3  | 67058329  | 67058357  | KITBD8                            | 1.03E-13 | 1.64E-10 | 0.16996  | 0.009217 | 0.039216 | 1        | 1        | 0.015504 | 0.005714 | 0.015873 | 1        | 1        | 0.063768 | 0.001081 | 0.010462 |          |          |          |
| 17 | 39033672  | 39033684  | RMCCL                             | 1.04E-13 | 1.98E-15 | 0.006266 | 1        | 0.153016 | 1        | 1        | 0.019608 | 0.014702 | 1        | 1        | 1        | 1        | 1        | 9.5E-22  | 1        | 0.013566 |          |
| 9  | 37887570  | 37887587  | SLC25A51                          | 1.05E-13 | 1.16E-06 | 0.002746 | 1        | 0.184689 | 0.12069  | 1        | 1        | 1        | 1        | 0.019231 | 1        | 1        | 1        | 8.53E-22 | 0.024691 | 0.316902 |          |
| 6  | 1779922   | 1779935   | KIF13A                            | 1.08E-13 | 6.89E-17 | 0.042254 | 1        | 0.023952 | 1        | 1        | 1        | 0.038275 | 1        | 1        | 1        | 1        | 1        | 1.69E-20 | 0.044994 | 0.003813 |          |
| 1  | 161201297 | 161201309 | KRIB3                             | 1.1E-13  | 6.55E-36 | 1        | 1        | 1        | 1        | 1        | 0.008772 | 1        | 1        | 1        | 1        | 1        | 1        | 2.9E-07  | 1        | 0.022216 |          |
| 1  | 14211061  | 14211079  | KIF11                             | 1.1E-13  | 2.22E-08 | 0.074827 | 1        | 0.078651 | 0.08308  | 1        | 1        | 1        | 1        | 1        | 1        | 1        | 1        | 3.95E-16 | 0.001485 | 1        |          |
| 11 | 4150238   | 4150253   | RNMI                              | 1.12E-13 | 6.81E-18 | 1        | 0.034483 | 0.116179 | 1        | 0.012739 | 1        | 1        | 1        | 1        | 1        | 1        | 1        | 8.04E-10 | 0.1875   | 0.005073 |          |
| X  | 131233588 | 131233600 | FRMD7                             | 1.12E-13 | 5.5E-11  | 1        | 0.133733 | 1        | 1        | 1        | 1        | 1        | 1        | 1        | 1        | 1        | 1        | 4.17E-23 | 0.043956 | 0.007158 |          |
| 20 | 60711773  | 60711796  | PSMA7                             | 1.13E-13 | 5.46E-18 | 0.058824 | 0.005882 | 1        | 1        | 1        | 1        | 1        | 1        | 1        | 1        | 1        | 1        | 2.52E-17 | 0.013699 | 0.078917 |          |
| 10 | 61612466  | 61612479  | CDC6                              | 1.13E-13 | 2.19E-05 | 0.018197 | 0.019231 | 0.486865 | 1        | 1        | 1        | 1        | 1        | 1        | 1        | 1        | 0.116883 | 7.01E-05 | 1        | 0.128255 |          |
| 7  | 2969910   | 2969921   | LOC646762                         | 1.13E-13 | 6.47E-05 | 1        | 1        | 1        | 0.036585 | 1        | 1        | 1        | 1        | 1        | 1        | 1        | 1        | 3.91E-08 | 0.014493 | 1        |          |
| X  | 20394479  | 20394490  | RPSK3A3                           | 1.14E-13 | 1.84E-11 | 0.09375  | 1        | 0.149588 | 1        | 1        | 1        | 1        | 0.059396 | 1        | 1        | 1        | 1        | 3.46E-18 | 0.032258 | 0.0116   |          |
| 3  | 98097080  | 98097103  | KNAK3                             | 1.14E-13 | 7.14E-07 | 0.035088 | 1        | 1        | 1        | 1        | 1        | 0.001833 | 1        | 0.0081   | 1        | 1        | 1        | 1.98E-11 | 0.001349 | 1        |          |
| 6  | 64022582  | 64022593  | PLXNC1                            | 1.14E-13 | 1.26E-15 | 5.14E-06 | 1        | 0.004263 | 1        | 1        | 0.033333 | 0.014925 | 1        | 0.4317   | 0.000861 | 0.004149 | 1        | 1        | 0.001835 | 1        |          |
| 13 | 100913132 | 100913161 | PCCA                              | 1.17E-13 | 2.56E-14 | 0.095238 | 1        | 0.067114 | 0.016064 | 1        | 1        | 0.002098 | 0.027778 | 1        | 1        | 1        | 0.036946 | 1        | 2.6E-05  |          |          |
| 10 | 101627343 | 101627360 | RPL31,TRC1D8                      | 1.19E-13 | 2.52E-15 | 0.181023 | 1        | 0.11     | 0.128857 | 1        | 1        | 1        | 1        | 1        | 1        | 1        | 1        | 9.79E-16 | 1        | 4.7E-07  |          |
| 5  | 45725103  | 45725138  | C15orf48                          | 1.2E-13  | 9.03E-27 | 0.096774 | 0.010101 | 1        | 1        | 1        | 1        | 0.12821  | 1        | 0.006699 | 1        | 1        | 1        | 9.32E-11 | 0.000926 | 1.02E-05 |          |
| 3  | 56807854  | 56807869  | ARHGEF3                           | 1.2E-13  | 2.36E-09 | 0.003229 | 1        | 0.061224 | 0.205859 | 1        | 1        | 0.093689 | 0.028571 | 1.09E-10 | 1        | 1        | 1        | 1.09E-10 | 1        | 0.026204 |          |
| 6  | 62611334  | 62611348  | KHDRB52                           | 1.2E-13  | 1.68E-23 | 0.015015 | 1        | 0.124167 | 1        | 1        | 1        | 0.008416 | 0.040816 | 1        | 1        | 1        | 0.07047  | 0.045455 | 0.003221 |          |          |
| 15 | 83805209  | 83805225  | KNAK3                             | 1.22E-13 | 5.20E-15 | 0.005668 | 1        | 0.09853  | 1        | 1        | 0.015748 | 0.046358 | 0.035714 | 0.454545 | 1        | 1        | 1        | 4.76E-17 | 0.000861 | 0.004149 |          |
| 10 | 169109123 | 169109143 | DDX60                             | 1.23E-13 | 3.35E-04 | 0.035088 | 0.10559  | 0.221326 | 1        | 1        | 1        | 0.033333 | 0.009139 | 1        | 1        | 1        | 0.352381 | 1        | 0.001835 |          |          |
| 3  | 108276264 | 108276276 | KIAA1524                          | 1.24E-13 | 2.39E-09 | 0.055556 | 1        | 1        | 1        | 1        | 1        | 0.037313 | 1        | 1        | 1        | 1        | 1        | 1.32E-09 | 0.076293 | 0.004442 |          |
| 17 | 37119364  | 37119376  | KIAA1207                          | 1.28E-13 | 3.44E-09 | 0.055556 | 1        | 1        | 1        | 1        | 1        | 0.019195 | 1        | 1        | 1        | 1        | 1        | 2.78E-10 | 1        | 3.2E-05  |          |
| 6  | 102130410 | 102130422 | GRK2                              | 1.29E-13 | 8.04E-15 | 2.35E-06 | 0.013889 | 1        | 0.110998 | 1        | 0.000164 | 0.048276 | 0.031746 | 1        | 1        | 1        | 1        | 8.03E-08 | 1        | 2.8E-07  |          |
| 1  | 185120927 | 185120940 | TRMT1L                            | 1.3E-13  | 1.58E-14 | 0.001357 | 1        | 1        | 0.023256 | 0.12046  | 1        | 1        | 1        | 1        | 1        | 1        | 1        | 1.58E-24 | 0.012821 | 1        |          |
| 11 | 47726034  | 47726053  | AGR12                             | 1.31E-13 | 8.08E-14 | 0.026245 | 1        | 1        | 1        | 1        | 1        | 0.059396 | 1        | 1        | 1        | 1        | 1        | 1.67E-17 | 0.001628 | 0.007943 |          |
| 1  | 23724360  | 23724373  | TRMT1L                            | 1.32E-13 | 0.002027 | 0.011426 | 0.024096 | 1        | 1        | 1        | 1        | 1        | 1        | 1        | 1        | 1        | 1        | 1        | 1.67E-17 | 0.001628 | 0.007943 |
| 2  | 119739123 | 119739147 | MARCO                             | 1.34E-13 | 8.3E-17  | 1        | 0.016279 | 0.047865 | 0.00035  | 1        | 0.029197 | 0.025    | 0.090909 | 0.0408   | 0.0087   | 0.00413  | 1        | 1        | 0.001835 | 1        |          |
| 8  | 17100456  | 17100471  | CNO77                             | 1.34E-13 | 6.77E-15 | 0.194225 | 1        | 0.19175  | 1        | 1        | 0.043161 | 0.004419 | 0.00605  | 1        | 1        | 1        | 4.7E-15  | 0.142634 | 0.044315 |          |          |
| 16 | 68155860  | 68155874  | FNATC3                            | 1.35E-13 | 1.32E-14 | 0.009524 | 0.076474 | 0.158951 | 0.000134 | 0.150567 | 1        | 0.05601  | 0.000816 | 1        | 1        | 1        | 1.88E-09 | 6.71E-05 | 0.668592 |          |          |
| 12 | 69090573  | 69090587  | NUP107                            | 1.37E-13 | 1.88E-15 | 0.111111 | 1        | 0.343147 | 0.004407 | 1        | 0.134142 | 0.001377 | 0.1875   | 1        | 1        | 1        | 1.51E-06 | 0.183508 | 0.195518 |          |          |
| 17 | 74286032  | 74286047  | ORC12                             | 1.37E-13 | 1.46E-24 | 1        | 0.010526 | 1        | 1        | 0.002005 | 1        | 0.028423 | 0.333333 | 1        | 1        | 1        | 1        | 1.34E-11 | 1        | 6.11E-08 |          |
| 3  | 14890135  | 148901407 | CP                                | 1.4E-13  | 3.02E-13 | 0.039216 | 1        | 1        | 1        | 1        | 0.054045 | 0.028571 | 1        | 1        | 1        | 1        | 1        | 2.35E-07 | 1        | 0.084448 |          |
| 20 | 43623620  | 43623658  | STK4                              | 1.41E-13 | 1.04E-13 | 0.004662 | 1        | 1        | 1        | 0.005464 | 1        |          |          |          |          |          |          |          |          |          |          |

|           |           |           |                                               |          |          |           |          |          |          |          |          |           |          |          |          |          |          |           |
|-----------|-----------|-----------|-----------------------------------------------|----------|----------|-----------|----------|----------|----------|----------|----------|-----------|----------|----------|----------|----------|----------|-----------|
| 2         | 24345196  | 24345211  | FAM228B,PFM4                                  | 3.77E-13 | 3E-09    | 0.213675  | 1        | 1        | 1        | 0.035712 | 1        | 0.029519  | 1        | 1        | 1        | 0.000447 | 1        | 9.07E-05  |
| 16        | 56335193  | 56335208  | BBS2                                          | 3.95E-13 | 2.21E-16 | 0.000709  | 1        | 0.095184 | 1        | 1        | 1        | 1         | 1        | 1        | 1        | 3.17E-05 | 1        | 1         |
| 14        | 104040415 | 104040450 | APOPPT1                                       | 3.96E-13 | 1.87E-05 | 0.003246  | 1        | 1        | 1        | 1        | 1        | 0.011628  | 1        | 1        | 1        | 4.4E-21  | 1        | 0.009016  |
| 7         | 165050541 | 165050587 | KO5TK1                                        | 4.02E-13 | 1.55E-05 | 1         | 1        | 1        | 1        | 1        | 1        | 0.414176  | 0.08383  | 0.133383 | 1        | 3.73E-24 | 0.063143 | 0.1050771 |
| 2         | 86683539  | 86683575  | KDMA                                          | 4.08E-13 | 0.044118 | 0.0002    | 1        | 1        | 1        | 1        | 1        | 1         | 1        | 1        | 1        | 1        | 1        | 0.0007176 |
| 137193301 | 137193332 | PEX7      | 4.08E-13                                      | 4.4E-11  | 0.057143 | 1         | 0.079065 | 1        | 1        | 0.005495 | 1        | 0.000138  | 1        | 1        | 1        | 6.08E-06 | 1        | 0.001776  |
| 8         | 121293133 | 121293158 | COLL4A1                                       | 4.09E-13 | 3.99E-08 | 0.028986  | 1        | 0.313659 | 1        | 1        | 1        | 1         | 1        | 1        | 0.026316 | 3.47E-11 | 0.047976 |           |
| 9         | 85926893  | 85926921  | FRMD3                                         | 4.09E-13 | 8.78E-09 | 0.057495  | 1        | 1        | 1        | 1        | 1        | 1         | 1        | 1        | 0.062004 | 1.67E-09 | 0.047976 |           |
| 15        | 43170667  | 43170727  | TIBK2                                         | 4.12E-13 | 0.047113 | 8.35E-05  | 1        | 0.546331 | 0.104261 | 1        | 1        | 1         | 1        | 1        | 1        | 2.54E-08 | 1        | 0.007691  |
| 1         | 155583121 | 155583149 | MST102P                                       | 4.18E-13 | 1.92E-08 | 0.022569  | 1        | 1        | 1        | 1        | 1        | 1         | 0.001442 | 1        | 1        | 1.91E-12 | 0.047059 | 0.053908  |
| 21        | 10916534  | 10916538  | KO5TK1                                        | 4.21E-13 | 0.001515 | 0.193947  | 1        | 1        | 1        | 1        | 1        | 0.039586  | 1        | 0.078919 | 0.315789 | 1.37E-05 | 0.134189 |           |
| 14        | 103449863 | 103449890 | LOC102888                                     | 4.22E-13 | 2.05E-22 | 1         | 0.20154  | 0.067067 | 1        | 1        | 1        | 0.013514  | 0.078621 | 1        | 0.000335 | 0.01638  | 0.005938 |           |
| 11        | 112832276 | 112832287 | CDCA1928847                                   | 4.45E-13 | 1.7E-30  | 1         | 1        | 1        | 1        | 0.03125  | 0.019048 | 1         | 0.088195 | 0.176471 | 2.84E-15 | 4.5E-05  |          |           |
| 3         | 148902929 | 148902942 | CP                                            | 4.53E-13 | 5.49E-16 | 0.193103  | 1        | 1        | 1        | 1        | 1        | 0.064268  | 0.12064  | 1        | 1        | 8.91E-08 | 0.027397 | 0.009323  |
| 137513369 | 137513382 | BRD8      | 4.53E-13                                      | 1.63E-14 | 0.086957 | 1         | 1        | 0.242609 | 1        | 0.026178 | 0.07244  | 0.22998   | 1        | 1        | 1        | 4.43E-09 | 1        | 0.000418  |
| 3         | 60522571  | 60522583  | FHIT                                          | 4.59E-13 | 1.5E-08  | 0.588244  | 1        | 1        | 0.019417 | 1        | 1        | 1         | 0.080782 | 1        | 1        | 0.00035  | 1        | 0.002854  |
| 4         | 184174896 | 184174908 | WWC2                                          | 4.66E-13 | 5.03E-08 | 0.03125   | 1        | 1        | 1        | 1        | 1        | 1         | 0.020408 | 1        | 1        | 9.59E-11 | 0.054795 | 0.383685  |
| 12        | 106500153 | 106500175 | NUMK1                                         | 4.69E-13 | 1.18E-06 | 0.171717  | 1        | 0.180637 | 1        | 0.085062 | 1        | 0.034041  | 0.036036 | 1        | 1        | 4.68E-10 | 1        | 0.448336  |
| K         | 32472757  | 32472777  | DMD                                           | 4.71E-13 | 2.58E-30 | 0.582458  | 1        | 0.229682 | 1        | 1        | 1        | 0.002759  | 1        | 1        | 0.111111 | 1        | 0.032329 |           |
| 1         | 98011812  | 98011842  | DYPD                                          | 4.76E-13 | 4.21E-17 | 0.002096  | 1        | 1        | 0.009376 | 0.039116 | 1        | 1         | 1        | 0.03125  | 1        | 2.74E-13 | 0.047619 | 0.000662  |
| 10        | 105990647 | 105990660 | CFAP43                                        | 4.87E-13 | 8.17E-15 | 1         | 1        | 0.008621 | 1        | 1        | 1        | 0.0099318 | 1        | 1        | 1        | 6.24E-05 | 1        | 0.016557  |
| 12        | 28459652  | 28459664  | CDCP91                                        | 4.99E-13 | 7.85E-14 | 0.08599   | 1        | 1        | 0.000143 | 1        | 1        | 0.086494  | 1        | 1        | 1        | 2.33E-05 | 1        | 6.23E-05  |
| 4         | 123128660 | 123128687 | KIAA1109                                      | 5.04E-13 | 2.02E-09 | 0.015495  | 1        | 1        | 1        | 1        | 1        | 1         | 1        | 1        | 1        | 7.79E-10 | 1        | 0.065388  |
| 11        | 125488247 | 125488261 | SIT3A                                         | 5.07E-13 | 6.99E-28 | 1         | 0.031746 | 0.041916 | 1        | 1        | 1        | 0.010989  | 1        | 1        | 1        | 2.03E-09 | 1        | 0.049808  |
| 1         | 145456732 | 145456747 | NBP1F0,NBP2F0,POLR3GL                         | 5.13E-13 | 9.85E-28 | 0.003049  | 0.02564  | 1        | 1        | 0.009353 | 0.057336 | 1         | 1        | 1        | 1        | 2.41E-17 | 1        | 0.046066  |
| 16        | 58351178  | 58351183  | CNBP1                                         | 5.21E-13 | 6.25E-12 | 0.011903  | 1        | 0.011903 | 1        | 0.020134 | 0.042112 | 1         | 1        | 1        | 0.103847 | 1        | 0.032033 |           |
| X         | 100375865 | 100375883 | KNP1                                          | 5.22E-13 | 1.93E-06 | 0.046512  | 1        | 1        | 1        | 1        | 1        | 1         | 1        | 1        | 1        | 0.001627 | 0.039798 | 0.02442   |
| 8         | 100287517 | 100287536 | VPS13B                                        | 5.24E-13 | 3.25E-20 | 0.024656  | 0.003922 | 0.000388 | 0.86371  | 1        | 1        | 1         | 1        | 1        | 1        | 1.42E-15 | 1        | 0.03725   |
| 15        | 83677270  | 83677285  | C15orf40                                      | 5.28E-13 | 1.84E-14 | 1         | 1        | 0.192278 | 1        | 0.038294 | 1        | 1         | 0.143603 | 1        | 1        | 0.000133 | 0.017544 | 0.000961  |
| 21        | 35094849  | 35094878  | ITSN1                                         | 5.31E-13 | 2.9E-08  | 0.006266  | 1        | 1        | 1        | 1        | 1        | 0.006579  | 0.022222 | 1        | 1        | 2.99E-21 | 0.027778 | 0.020219  |
| 43        | 43872451  | 43872468  | ENOX1                                         | 5.34E-13 | 5.31E-09 | 0.00046   | 1        | 1        | 1        | 1        | 1        | 0.076433  | 1        | 1        | 1        | 2.62E-20 | 1        | 0.001209  |
| 19        | 50911947  | 50911960  | PODI1                                         | 5.41E-13 | 4.11E-31 | 1         | 1        | 0.00014  | 1        | 0.05     | 1        | 0.028316  | 0.25     | 5.71E-13 | 1        | 1        | 1        |           |
| 6         | 109510963 | 109510981 | CNBP1                                         | 5.44E-13 | 2.07E-13 | 0.005048  | 0.028086 | 1        | 0.053923 | 0.015094 | 1        | 1         | 1        | 1        | 1        | 1        | 1        | 1         |
| 8         | 89791609  | 89791620  | POI3R3                                        | 5.56E-13 | 3.58E-09 | 0.0114    | 1        | 1        | 1        | 1        | 1        | 1         | 1        | 1        | 1        | 6.85E-13 | 0.05     | 0.058621  |
| 3         | 160144007 | 160144039 | SMC4                                          | 5.56E-13 | 3.82E-23 | 0.000264  | 1        | 0.066667 | 0.042857 | 1        | 1        | 0.000649  | 1        | 1        | 1        | 1.95E-20 | 1.48E-05 | 0.058394  |
| 7         | 104309164 | 104309177 | LHFLP3                                        | 5.57E-13 | 1.6E-08  | 0.027223  | 1        | 0.001077 | 1        | 1        | 1        | 1         | 1        | 0.333333 | 8.3E-06  | 0.018868 | 0.059166 |           |
| 1         | 35826959  | 35826972  | ZMYM4                                         | 5.68E-13 | 7.4E-06  | 1         | 1        | 1        | 1        | 1        | 1        | 1         | 0.015873 | 1        | 1        | 1.44E-08 | 0.0375   | 0.048593  |
| 6         | 158294098 | 158294121 | SNX9                                          | 5.77E-13 | 1.16E-06 | 0.088235  | 1        | 1        | 1        | 1        | 1        | 1         | 1        | 1        | 1        | 8.89E-06 | 0.031915 | 0.023709  |
| 13        | 42491778  | 42491796  | EPST11                                        | 5.86E-13 | 9.98E-20 | 0.000815  | 1        | 0.043316 | 1        | 0.057957 | 1        | 1         | 1        | 1        | 1        | 7.62E-22 | 1        | 0.0188    |
| 16        | 46592385  | 46592395  | TRIP11                                        | 6.06E-13 | 4.63E-07 | 0.000191  | 1        | 1        | 1        | 1        | 1        | 1         | 1        | 1        | 1        | 2.36E-08 | 1        | 0.012408  |
| 6         | 64687558  | 64687585  | TRIP4                                         | 6.17E-13 | 9.97E-08 | 1         | 1        | 0.041375 | 1        | 1        | 1        | 1         | 1        | 1        | 1        | 1.34E-07 | 1        | 0.002278  |
| 1         | 204494748 | 204494783 | MDM4                                          | 6.18E-13 | 1.26E-07 | 0.002105  | 0.00995  | 1        | 1        | 1        | 1        | 1         | 0.037736 | 1        | 1        | 2.22E-13 | 0.040541 | 1         |
| 13        | 30822226  | 30822240  | IPO8                                          | 6.25E-13 | 7.33E-10 | 0.017544  | 1        | 1        | 1        | 1        | 1        | 0.016529  | 1        | 1        | 1        | 0.000166 | 1        | 0.000587  |
| 13        | 45556282  | 45556303  | NUFIP1                                        | 6.39E-13 | 2.24E-07 | 0.08      | 1        | 1        | 1        | 1        | 0.01     | 1         | 1        | 1        | 1        | 4.18E-11 | 0.045612 | 1         |
| 14        | 50050396  | 50050408  | RSP29                                         | 6.64E-13 | 1.83E-18 | 1         | 1        | 1        | 1        | 1        | 1        | 1         | 0.020833 | 0.095188 | 1        | 1.03E-12 | 0.035714 | 0.000165  |
| 12        | 110720351 | 110720363 | ATP2A2                                        | 6.81E-13 | 3.09E-20 | 1         | 1        | 0.079702 | 0.004598 | 1        | 1        | 1.34E-08  | 1        | 1        | 1        | 2.01E-15 | 1        | 0.072414  |
| X         | 11953084  | 11953093  | TRIS1                                         | 6.83E-13 | 1.67E-13 | 0.0008016 | 1        | 0.032622 | 1        | 1        | 1        | 0.015873  | 1        | 1        | 1        | 0.00123  | 0.092347 | 0.012408  |
| 21        | 12142055  | 12142059  | INT57                                         | 7.01E-13 | 6.25E-12 | 0.107071  | 1        | 1        | 1        | 1        | 1        | 0.168831  | 3.47E-14 | 1        | 1        | 0.01165  | 1        | 0.01165   |
| 2         | 203384776 | 203384799 | BMP2R2                                        | 7.11E-13 | 1.89E-10 | 0.014286  | 1        | 1        | 0.009346 | 1        | 1        | 0.061762  | 0.083333 | 0.181818 | 1.27E-13 | 1        | 0.531266 |           |
| 12        | 14599896  | 14599919  | ATFY1P                                        | 7.18E-13 | 4.27E-17 | 0.007212  | 1        | 0.107075 | 0.007308 | 1        | 1        | 0.004428  | 0.030769 | 1        | 1        | 4.23E-15 | 0.035714 | 0.058485  |
| 6         | 49423956  | 49423968  | MUT                                           | 7.19E-13 | 5.14E-17 | 0.00266   | 1        | 0.068942 | 1        | 1        | 1        | 0.026549  | 1        | 1        | 1        | 2.43E-09 | 1        | 0.021569  |
| 1         | 1920434   | 1920449   | CFAP74                                        | 7.31E-13 | 1.71E-13 | 1         | 0.018182 | 1        | 1        | 1        | 1        | 1         | 0.001317 | 1        | 1        | 2.56E-07 | 0.115272 | 0.059511  |
| 12        | 102131090 | 102131108 | SYCP3                                         | 7.34E-13 | 3.95E-24 | 0.131213  | 0.04329  | 1        | 0.115362 | 1        | 1        | 0.065772  | 0.075441 | 0.3      | 1        | 1.11E-17 | 1        | 0.201942  |
| 14        | 76420881  | 76420903  | TTLS1                                         | 7.42E-13 | 1.1E-12  | 1         | 0.049992 | 0.025331 | 1        | 1        | 1        | 1         | 1        | 1        | 1        | 0.00123  | 0.102199 | 1         |
| 7         | 116556088 | 116556111 | CAPA2                                         | 7.49E-13 | 4.02E-11 | 0.001185  | 1        | 1        | 1        | 1        | 1        | 1         | 1        | 1        | 1        | 4.16E-16 | 0.002896 | 1         |
| 11        | 9192336   | 9192336   | DEMN5A                                        | 7.56E-13 | 6.15E-11 | 0.021719  | 1        | 0.104404 | 1        | 1        | 1        | 1         | 1        | 1        | 1        | 7.4E-06  | 1        | 0.000756  |
| 12        | 95498747  | 95498778  | FGD6                                          | 7.72E-13 | 2.2E-12  | 0.172078  | 1        | 1        | 1        | 1        | 1        | 0.019355  | 1        | 1        | 1        | 7.14E-16 | 1        | 0.00542   |
| 6         | 6485740   | 6485753   | DAGLB                                         | 7.79E-13 | 1.18E-18 | 1         | 0.009709 | 1        | 1        | 1        | 1        | 0.120104  | 1        | 1        | 1        | 7.18E-06 | 1        | 0.030487  |
| 13        | 77818089  | 77818117  | MYCBP2                                        | 7.93E-13 | 0.008358 | 0.072464  | 1        | 1        | 1        | 1        | 1        | 1         | 1        | 1        | 1        | 1.23E-18 | 1        | 2.3E-05   |
| 6         | 30557379  | 30557397  | ABCF3                                         | 8.14E-13 | 3.14E-09 | 0.284091  | 0.044776 | 1        | 1        | 1        | 0.064241 | 1         | 1        | 1        | 1        | 3.29E-10 | 0.166667 | 0.005093  |
| 10        | 98531731  | 98531746  | TMSF3P                                        | 8.17E-13 | 1.67E-24 | 0.193103  | 1        | 0.132264 | 1        | 1        | 1        | 0.055546  | 1        | 1        | 1        | 1.49E-10 | 0.059249 | 0.017286  |
| 13        | 58299422  | 58299437  | TRAF3IP2(dist=27397),LOC101927814(dist=41845) | 8.21E-13 | 2.63E-07 | 0.000816  | 1        | 1        | 1        | 1        | 0.014923 | 1         | 1        | 1        | 1        | 0.000661 | 0.012408 | 1         |
| 16        | 19451273  | 19451297  | TMC5                                          | 8.74E-13 | 1.38E-18 | 0.081081  | 1        | 0.031681 | 1        | 1        | 1        | 1         | 1        | 1        | 1        | 6.07E-06 | 1        | 0.082503  |
| 15        | 59009910  | 59009941  | ADAM10                                        | 8.88E-13 | 1.62E-11 | 0.046154  | 0.007874 | 1        | 1        | 1        | 1        | 1         | 1        | 1        | 1        | 3.08E-15 | 0.047619 | 1         |
| 2         | 55789793  | 55789806  | DYX1C1-CCPG1                                  | 8.96E-13 | 3.94E-20 | 0.025     | 1        | 0.050271 | 0.015625 | 1        | 1        | 0.098834  | 1        | 1        | 1        | 4.76E-06 | 0.142857 | 0.021872  |
| 2         | 86348737  | 86348749  | CCP1                                          | 9.37E-13 | 3.74E-09 | 1         | 0.069565 | 0.011561 | 1        | 1        | 1        | 0.073684  | 0.028571 | 1        | 1        | 2.09E-08 | 1        | 1         |
| 21        | 30435646  | 30435668  | CCT8                                          | 9.45E-13 | 5.32E-27 | 0.117651  | 0.010417 | 1        | 0.022059 | 1        | 1        | 0.059406  | 1        | 1        | 1        | 1.01E-14 | 1        | 1.32E-06  |

|    |           |           |                                      |          |          |          |          |          |          |          |          |          |          |           |          |          |          |          |
|----|-----------|-----------|--------------------------------------|----------|----------|----------|----------|----------|----------|----------|----------|----------|----------|-----------|----------|----------|----------|----------|
| 10 | 94366347  | 94366370  | KIF11                                | 2.61E-12 | 4.98E-18 | 0.008471 | 0.003623 | 1        | 1        | 1        | 1        | 1        | 1        | 1         | 1        | 7.13E-16 | 1        | 5.96E-05 |
| 15 | 51017381  | 51017393  | SPP12A                               | 2.61E-12 | 1.64E-24 | 0.016129 |          | 1        | 1        | 0.028249 |          |          |          | 1         | 1        | 0.004354 | 1        | 1.43E-10 |
| 1  | 36479764  | 36479778  | AGO3                                 | 2.61E-12 | 1.29E-11 | 0.057892 |          | 1        | 1        | 1        | 1        | 1        | 0.008065 | 1         | 1        | 1        | 1        | 1.58E-10 |
| 1  | 94543143  | 94543157  | MRXG29                               | 2.61E-12 | 3.91E-17 | 0.058244 |          | 1        | 1        | 1        | 1        | 1        | 0.012774 | 0.012774  | 0.027277 | 1        | 1        | 0.21E-06 |
| 6  | 165809963 | 165809979 | PDE10A                               | 2.61E-12 | 1.37E-53 | 0.000324 |          | 1        | 0.086601 | 0.021774 | 1        | 1        | 1        | 0.026786  | 1        | 1        | 1        | 0.001191 |
| 10 | 17110577  | 17110588  | CUBN                                 | 2.69E-12 | 4.66E-34 | 0.058824 | 1        | 1        | 1        | 0.039896 | 0.001442 | 0.003906 | 1        | 1         | 0.029412 | 1        | 1        | 1.00E-29 |
| 8  | 101253085 | 101253108 | SPAG1                                | 2.72E-12 | 1.11E-09 | 0.012442 | 1        | 0.094287 | 0.036364 | 1        | 1        | 1        | 0.021739 | 1         | 1        | 1        | 1        | 0.009848 |
| 12 | 123103115 | 123103129 | KNTC1                                | 2.81E-12 | 1.01E-09 | 0.03008  |          | 1        | 1        | 1        | 1        | 1        | 0.015267 | 0.009346  | 1        | 1        | 1        | 0.20E-09 |
| 15 | 34380216  | 34380230  | EMC7                                 | 2.86E-12 | 0.000179 | 1        | 1        | 1        | 1        | 1        | 1        | 1        | 0.031619 | 0.031579  | 1        | 1        | 1        | 0.001211 |
| 1  | 17391292  | 17391336  | KC3H1                                | 2.86E-12 | 0.000616 | 0.011816 | 1        | 1        | 1        | 0.017857 | 1        | 1        | 1        | 1         | 1        | 1        | 1        | 0.000289 |
| 2  | 87110591  | 87110595  | MRXG1                                | 2.87E-12 | 2.19E-06 | 0.058724 |          | 1        | 1        | 1        | 1        | 1        | 1        | 1         | 1        | 1        | 1        | 0.001211 |
| 4  | 100137292 | 100137316 | ADH6                                 | 2.86E-12 | 2.16E-06 | 0.085106 | 0.036697 | 0.271854 | 1        | 1        | 0.057792 | 1        | 1        | 0.062483  | 1        | 1        | 1        | 0.003798 |
| 2  | 39240584  | 39240596  | KSLG                                 | 2.89E-12 | 7.77E-29 | 1        | 1        | 1        | 0.038168 | 0.004062 | 0.000316 | 1        | 1        | 0.002579  | 0.000726 | 1        | 1        | 0.004691 |
| 6  | 131948469 | 131948501 | MEDD3                                | 2.94E-12 | 2.27E-08 | 0.006036 | 1        | 0.059829 | 1        | 1        | 1        | 1        | 1        | 1         | 0.028986 | 1        | 1        | 0.000431 |
| 6  | 42625963  | 42625974  | UBR2                                 | 2.96E-12 | 1.03E-18 | 0.055556 | 1        | 1        | 1        | 1        | 1        | 1        | 0.017422 | 1         | 1        | 1        | 1        | 0.05E-09 |
| 8  | 131859768 | 131859803 | ADCY8                                | 2.97E-12 | 2.5E-05  | 0.002976 | 1        | 1        | 1        | 1        | 1        | 1        | 1        | 1         | 0.011364 | 1        | 1        | 0.000111 |
| 2  | 121047044 | 121047056 | RAB18                                | 2.98E-12 | 3.26E-21 | 1        | 1        | 1        | 1        | 1        | 0.022026 | 1        | 1        | 1         | 1        | 1        | 1        | 0.003662 |
| 16 | 74920075  | 74920089  | WDR59                                | 3.08E-12 | 4.35E-08 | 0.025997 | 1        | 1        | 1        | 1        | 1        | 1        | 1        | 0.000413  | 1        | 1        | 1        | 0.04E-07 |
| 17 | 28811824  | 28811848  | OSK1                                 | 3.04E-12 | 2.55E-34 | 0.003782 | 1        | 0.125995 | 0.014085 | 1        | 1        | 1        | 0.017857 | 1         | 1        | 0.024527 | 0.005889 | 0.100955 |
| 15 | 44057632  | 44057645  | PDIA3                                | 3.07E-12 | 1.38E-18 | 0.05     | 0.024242 | 0.061538 | 0.018018 | 0.080176 | 1        | 1        | 1        | 0.037037  | 0.037037 | 1        | 1        | 0.001104 |
| 5  | 126866119 | 126866130 | PRRC1                                | 3.08E-12 | 4.57E-49 | 0.012987 | 1        | 1        | 0.023529 | 1        | 1        | 1        | 1        | 1         | 1        | 1        | 1        | 0.000467 |
| 12 | 122758719 | 122758730 | CLIP1                                | 3.08E-12 | 2.27E-18 | 0.004706 | 1        | 1        | 0.059867 | 0.019417 | 1        | 1        | 1        | 0.0092593 | 1        | 1        | 1        | 0.004625 |
| 7  | 72966422  | 72966438  | BCL7B                                | 3.09E-12 | 1.55E-14 | 1        | 1        | 1        | 1        | 1        | 1        | 1        | 0.006329 | 1         | 1        | 1        | 1        | 0.000467 |
| 5  | 158126222 | 158126236 | EBF1                                 | 3.09E-12 | 3.08E-13 | 0.013239 | 1        | 1        | 1        | 0.014493 | 1        | 1        | 0.022727 | 0.023256  | 1        | 1        | 1        | 0.014106 |
| 7  | 54819993  | 54820005  | SEC1G                                | 3.09E-12 | 2.26E-12 | 1        | 1        | 1        | 1        | 1        | 1        | 1        | 0.000414 | 1         | 1        | 1        | 1        | 0.001919 |
| 14 | 75497428  | 75497443  | USP11                                | 3.1E-12  | 1.06E-12 | 1        | 1        | 1        | 0.027778 | 1        | 1        | 1        | 0.04717  | 1         | 1        | 1        | 1        | 0.002444 |
| 4  | 3040279   | 3040293   | GRK4                                 | 3.21E-12 | 1.12E-18 | 0.131034 | 1        | 1        | 1        | 0.071771 | 0.030303 | 1        | 0.07573  | 1         | 1        | 1        | 1        | 0.01E-07 |
| 1  | 95368553  | 95368604  | CNN3                                 | 3.24E-12 | 4.2E-05  | 0.074627 | 1        | 1        | 1        | 0.021053 | 1        | 1        | 1        | 1         | 1        | 1        | 1        | 0.001104 |
| 17 | 62532622  | 62532635  | CEP95                                | 3.25E-12 | 5.95E-11 | 1        | 1        | 1        | 1        | 0.013514 | 1        | 1        | 0.02439  | 0.018182  | 1        | 1        | 1        | 0.044418 |
| 10 | 96108988  | 96109000  | NOC3L                                | 3.25E-12 | 4.21E-15 | 0.004558 | 1        | 1        | 0.03555  | 1        | 1        | 0.011236 | 0.000173 | 1         | 1        | 1        | 1        | 0.069866 |
| 1  | 22084284  | 22084307  | USP48                                | 3.26E-12 | 5.32E-12 | 0.102564 | 1        | 1        | 0.025316 | 1        | 1        | 1        | 1        | 1         | 1        | 1        | 1        | 0.014219 |
| 1  | 86355414  | 86355428  | COL24A1                              | 3.27E-12 | 0.000129 | 0.068182 | 0.047619 | 1        | 1        | 1        | 1        | 1        | 1        | 0.0833    | 1        | 1        | 1        | 0.10679  |
| 1  | 28011824  | 28011833  | OSK1                                 | 3.27E-12 | 6.29E-06 | 0.000405 | 1        | 0.12     | 0.02439  | 1        | 1        | 1        | 0.000571 | 1         | 1        | 1        | 1        | 0.037736 |
| 13 | 31195409  | 31195432  | USP11                                | 3.26E-12 | 3.94E-16 | 6.43E-05 | 1        | 1        | 1        | 0.020408 | 1        | 1        | 0.014815 | 9.8E-05   | 0.017544 | 4.77E-11 | 1        | 0.042553 |
| 2  | 212578379 | 212578394 | ERBB4                                | 3.31E-12 | 2.17E-15 | 7.22E-05 | 1        | 1        | 1        | 1        | 1        | 1        | 0.158405 | 0.02020   | 0.401709 | 3.7E-20  | 1        | 0.02722  |
| 15 | 57484572  | 57484587  | TCF12                                | 3.33E-12 | 1.45E-16 | 0.026455 | 1        | 1        | 0.136165 | 1        | 1        | 0.019231 | 1        | 0.1       | 1        | 1        | 1        | 0.015298 |
| 1  | 75311040  | 75311051  | SCAMP5                               | 3.4E-12  | 2.59E-07 | 1        | 1        | 1        | 0.070779 | 1        | 1        | 1        | 0.037037 | 1         | 1        | 1        | 1        | 0.010516 |
| 1  | 46726867  | 46726890  | RAD54L                               | 3.54E-12 | 1.62E-16 | 0.094077 | 0.072072 | 0.086284 | 0.01005  | 0.01676  | 1        | 1        | 1        | 1         | 1        | 1        | 1        | 0.009853 |
| 4  | 186188737 | 18618888  | SNAI25                               | 3.57E-12 | 4.12E-11 | 0.020197 | 1        | 1        | 1        | 1        | 1        | 1        | 0.037034 | 1         | 1        | 1        | 1        | 0.39E-05 |
| 3  | 91887905  | 91887913  | CDC6[dist=39930],GTPBR[dist=75449]   | 3.57E-12 | 7.98E-06 | 0.000405 | 1        | 1        | 1        | 1        | 1        | 1        | 0.057143 | 1         | 1        | 1        | 0.002449 | 0.00061  |
| 2  | 20249630  | 20249642  | TMEM237                              | 3.62E-12 | 3.31E-09 | 1        | 1        | 1        | 0.020408 | 1        | 1        | 1        | 0.014815 | 9.8E-05   | 0.017544 | 4.77E-11 | 1        | 0.042553 |
| 13 | 78137932  | 78137946  | SCEL                                 | 3.71E-12 | 6.19E-15 | 1        | 1        | 1        | 0.005541 | 1        | 1        | 1        | 0.278062 | 0.02222   | 0.071429 | 2.86E-08 | 1        | 0.087896 |
| 9  | 35382559  | 35382578  | UNC138                               | 3.75E-12 | 7.82E-16 | 1        | 1        | 1        | 1        | 1        | 1        | 1        | 1        | 1         | 1        | 1        | 1        | 0.060811 |
| 19 | 55420537  | 55420549  | NCR1                                 | 3.8E-12  | 2.05E-12 | 0.0289   | 1        | 1        | 1        | 0.18072  | 1        | 1        | 1        | 1         | 1        | 1        | 1        | 0.011921 |
| 10 | 102287989 | 10228800  | TARSL2[dist=23344],ORA6F[dist=57923] | 3.83E-12 | 1.8E-23  | 0.0251   | 1        | 0.00413  | 0.086159 | 1        | 1        | 1        | 0.00936  | 1         | 1        | 1        | 1        | 0.012821 |
| 9  | 86584222  | 86584234  | HNRNP1                               | 3.87E-12 | 2.83E-16 | 1        | 1        | 1        | 1        | 0.017353 | 1        | 1        | 0.041447 | 0.004605  | 1        | 1        | 1        | 0.31E-07 |
| 12 | 19140744  | 19140758  | PCSK5                                | 3.91E-12 | 8.12E-06 | 0.002177 | 0.018306 | 0.360056 | 1        | 1        | 1        | 1        | 0.001038 | 0.001242  | 1        | 0.039216 | 1        | 0.002449 |
| 22 | 41559824  | 4155996   | EP300                                | 3.95E-12 | 6.58E-12 | 0.004525 | 1        | 1        | 0.063474 | 1        | 1        | 1        | 0.38462  | 0.002621  | 1        | 1        | 1        | 0.001104 |
| 5  | 153174310 | 153174322 | GRI1A                                | 3.95E-12 | 1.32E-12 | 1        | 0.012987 | 0.06808  | 1        | 1        | 1        | 1        | 1        | 1         | 1        | 1        | 1        | 0.17E-05 |
| 6  | 68524006  | 68524019  | MRP536                               | 4.04E-12 | 2.24E-08 | 0.007035 | 1        | 0.144731 | 1        | 1        | 1        | 1        | 1        | 0.001231  | 1        | 1        | 1        | 0.91E-12 |
| 7  | 133886342 | 133886370 | LRGUK                                | 1.26E-08 | 4.22E-06 | 0.002347 | 1        | 1        | 1        | 1        | 1        | 1        | 0.029866 | 1         | 1        | 1        | 1        | 0.054795 |
| 10 | 93579111  | 93579133  | TNKS2                                | 4.15E-10 | 0.000143 | 0.006908 | 1        | 1        | 1        | 1        | 1        | 1        | 0.019231 | 0.052281  | 1        | 1        | 1        | 0.004816 |
| 5  | 86659147  | 86659159  | RASA1                                | 2.46E-11 | 6.43E-12 | 1        | 0.149321 | 1        | 1        | 1        | 1        | 1        | 0.139373 | 0.016667  | 1        | 1        | 1        | 0.123991 |
| 1  | 89898964  | 89898972  | PCSK2                                | 1.16E-10 | 7.97E-08 | 1        | 1        | 1        | 1        | 1        | 1        | 1        | 0.001242 | 1         | 1        | 1        | 1        | 0.02703  |
| 6  | 108217475 | 10821752  | SEC3                                 | 1.03E-06 | 5.87E-16 | 0.021739 | 0.027777 | 1        | 1        | 0.028571 | 1        | 1        | 1        | 0.126004  | 0.014493 | 1        | 1        | 0.096868 |
| 5  | 159831736 | 159831748 | SLU7                                 | 1.03E-08 | 3.16E-05 | 0.046875 | 1        | 1        | 1        | 1        | 1        | 1        | 0.014925 | 1         | 1        | 1        | 1        | 0.001104 |
| 1  | 212217944 | 212217961 | DTL                                  | 9.39E-12 | 3.63E-12 | 0.003993 | 0.013333 | 1        | 1        | 1        | 1        | 1        | 1        | 1         | 1        | 1        | 1        | 0.227849 |
| 14 | 57072251  | 57072275  | TMEM260                              | 4.85E-06 | 8.7E-10  | 0.018868 | 1        | 1        | 1        | 1        | 1        | 1        | 0.017857 | 0.08      | 1        | 1        | 1        | 0.159021 |
| 6  | 86387036  | 86387048  | SNORD50A                             | 0.000655 | 1.02E-08 | 1        | 1        | 1        | 1        | 1        | 1        | 1        | 0.001683 | 1         | 1        | 1        | 1        | 0.028169 |
| 7  | 131113756 | 131113779 | MKN1                                 | 3.39E-09 | 2.21E-13 | 0.034483 | 0.004673 | 1        | 1        | 1        | 0.00463  | 1        | 1        | 0.000481  | 1        | 1        | 1        | 0.000733 |
| 1  | 64022708  | 64022715  | FKBP1                                | 5.13E-12 | 1.24E-16 | 0.169043 | 1        | 0.41938  | 1        | 1        | 1        | 1        | 1        | 0.013158  | 1        | 1        | 1        | 0.43E-05 |
| 15 | 4232798   | 4232799   | GANC                                 | 3.79E-02 | 7.98E-06 | 0.066639 | 1        | 1        | 1        | 1        | 1        | 1        | 1        | 1         | 1        | 1        | 1        | 0.001104 |
| 2  | 196762491 | 196762509 | DNAH7                                | 1.77E-10 | 1.01E-13 | 2.27E-05 | 1        | 1        | 1        | 1        | 1        | 0.014184 | 0.011494 | 0.002162  | 1        | 1        | 1        | 0.001104 |
| 7  | 89982116  | 89982127  | PTBP10                               | 1.1E-05  | 1.86E-07 | 1        | 1        | 0.117647 | 1        | 1        | 1        | 1        | 1        | 1         | 1        | 1        | 1        | 0.00024  |
| 8  | 101936106 | 101936118 | YWH4                                 | 3.44E-09 | 9.18E-11 | 0.010101 | 1        | 1        | 0.022472 | 1        | 1        | 0.025424 | 1        | 1         | 1        | 1        | 1        | 0.006384 |
| 8  | 125534481 | 125534503 | TATDN1                               | 9.88E-09 | 2.5E-11  | 0.066066 | 1        | 1        | 0.02649  | 1        | 1        | 0.035088 | 1        | 1         | 1        | 1        | 1        | 0.002326 |
| 1  | 202736222 | 202736233 | KDM5B                                | 1.87E-09 | 6.49E-26 | 0.001502 | 4.69E-05 | 1        | 0.008827 | 0.019802 | 1        | 1        | 0.009936 | 0.029851  | 1        | 1        | 1        | 0.063934 |
| 10 | 75497107  | 75497133  | GLD1P3[dist=1740],SEC24C[dist=6998]  | 8.82E-06 | 1.46E-05 | 1        | 1        | 1        | 1        | 1        | 1        | 1        | 1        | 1         | 1        | 1        | 1        | 0.091617 |
| 6  | 64133381  | 64133385  | PCSK5                                | 2.14E-12 | 1.26E-06 | 0.038462 | 1        | 1        | 1        | 1        | 1        | 1        | 1        | 1         | 1        | 1        | 1        | 0.001665 |
| 13 | 37582122  | 37582135  | EXOSC8                               |          |          |          |          |          |          |          |          |          |          |           |          |          |          |          |

|    |           |           |                                        |          |          |          |          |          |          |          |          |          |          |          |          |          |          |          |           |          |
|----|-----------|-----------|----------------------------------------|----------|----------|----------|----------|----------|----------|----------|----------|----------|----------|----------|----------|----------|----------|----------|-----------|----------|
| 4  | 69964234  | 69964245  | UGT2B7                                 | 0.000761 | 1.22E-11 | 1        | 1        | 1        | 0.129461 | 0.169909 | 1        | 0.103632 | 0.083996 | 1        | 0.285714 | 9.12E-06 | 0.047976 | 0.517354 |           |          |
| 6  | 121412191 | 121412603 | TBCD132                                | 9.34E-07 | 2.36E-10 | 1        | 1        | 1        | 0.004149 | 1        | 1        | 0.008197 | 0.002682 | 1        | 1        | 1        | 6.56E-08 | 1.000247 |           |          |
| 7  | 23290963  | 23290974  | NUP12                                  | 8.46E-11 | 1.46E-22 | 1        | 0.011494 | 0.182124 | 1        | 1        | 1        | 1        | 1        | 1        | 1        | 1        | 6.5E-12  | 0.010485 | 0.000286  |          |
| 8  | 6334449   | 6334450   | NRX35                                  | 3.24E-03 | 0.085678 | 0.010989 | 0.071429 | 1        | 1        | 1        | 1        | 1        | 1        | 1        | 1        | 1        | 1        | 0.013158 | 0.230515  |          |
| 8  | 120831492 | 12083157  | TAZF                                   | 0.000155 | 1.31E-07 | 0.166667 | 1        | 1        | 1        | 1        | 1        | 1        | 1        | 1        | 1        | 1        | 1        | 0.000528 | 0.089947  |          |
| 1  | 100206566 | 100206577 | FRRS1                                  | 1        | 0.000225 | 1        | 1        | 1        | 1        | 1        | 1        | 1        | 1        | 1        | 1        | 1        | 1        | 0.013449 | 1         |          |
| 12 | 102576299 | 102576300 | PARBPB                                 | 3.96E-11 | 1.28E-09 | 0.06014  | 0.018182 | 1        | 1        | 1        | 1        | 0.079334 | 1        | 0.052632 | 1.38E-15 | 1        | 1        | 0.395873 |           |          |
| 17 | 35771517  | 35771528  | TADA2A                                 | 0.010625 | 6.52E-06 | 1        | 1        | 1        | 0.000287 | 1        | 1        | 1        | 1        | 1        | 1        | 1        | 1        | 0.000616 | 1.074074  |          |
| 18 | 59894493  | 59894513  | KIAM1468                               | 3.71E-06 | 5.6E-06  | 1        | 1        | 1        | 1        | 1        | 1        | 1        | 0.04878  | 1        | 1        | 1        | 1        | 1.28E-08 | 0.078818  |          |
| 3  | 44608820  | 44608836  | ZKSCAN7                                | 4.54E-08 | 7.83E-09 | 1        | 1        | 1        | 1        | 1        | 1        | 0.025641 | 0.017241 | 1        | 0.002947 | 1        | 1        | 0.002947 |           |          |
| 5  | 82937251  | 82937261  | HANL1                                  | 1.37E-06 | 0.018868 | 0.078658 | 1        | 0.046723 | 1        | 1        | 1        | 1        | 1        | 1        | 0.041667 | 1        | 8.4E-12  | 0.02439  | 0.050209  |          |
| 7  | 35218768  | 35218786  | DPY19L2P1                              | 5.41E-10 | 2.38E-13 | 0.002009 | 1        | 1        | 1        | 1        | 1        | 0.037057 | 1        | 1        | 1        | 1        | 1        | 1.17E-09 | 0.189614  |          |
| 8  | 62557195  | 62557207  | ASPH                                   | 2.4E-10  | 1.83E-14 | 0.001815 | 1        | 1        | 0.080775 | 0.027397 | 1        | 1        | 1        | 1        | 0.3      | 3.77E-12 | 1        | 1.49E-06 |           |          |
| 9  | 112225552 | 112225564 | PTPN3                                  | 1.15E-10 | 9.22E-15 | 0.042254 | 1        | 1        | 0.056214 | 1        | 1        | 1        | 1.74E-05 | 1        | 1        | 2.8E-07  | 1        | 0.038501 |           |          |
| 9  | 123922400 | 123922412 | CNTRL                                  | 5.92E-11 | 3.67E-18 | 0.015624 | 1        | 1        | 0.029412 | 1        | 0.004405 | 1        | 0.016667 | 1        | 1        | 1        | 1        | 0.006433 |           |          |
| 1  | 35826773  | 35826784  | ZMYMM                                  | 2.72E-11 | 1.86E-11 | 1        | 1        | 1        | 0.029586 | 1        | 1        | 1        | 0.033333 | 1        | 1        | 1        | 1        | 0.036855 | 0.06422   |          |
| 10 | 114154662 | 114154673 | ACSL5                                  | 2.15E-11 | 1.46E-19 | 0.002775 | 0.158163 | 1        | 0.087143 | 1        | 1        | 1        | 4.24E-05 | 0.02     | 1        | 7.61E-13 | 1        | 0.00054  |           |          |
| 10 | 116915795 | 116915796 | ATRNLL1                                | 2.27E-06 | 3.03E-08 | 0.037037 | 1        | 1        | 1.32E-05 | 0.018868 | 0.171717 | 1        | 1        | 1        | 1        | 7.79E-09 | 1        | 0.012783 |           |          |
| 10 | 94235457  | 94235470  | IDE                                    | 6.63E-09 | 9.29E-09 | 0.011402 | 1        | 1        | 1        | 1        | 1        | 1        | 1        | 1        | 1        | 1        | 1        | 1.34E-07 | 0.931119  |          |
| 11 | 108332126 | 108332138 | C11orf65                               | 2.39E-07 | 3.51E-15 | 0.041667 | 1        | 1        | 0.015504 | 0.016667 | 0.131579 | 1        | 1        | 1        | 1        | 1        | 1        | 2.14E-08 | 0.028571  |          |
| 14 | 45497556  | 45497567  | FAML79B                                | 0.001813 | 5.01E-09 | 0.0625   | 1        | 1        | 0.000549 | 1        | 1        | 1        | 1        | 1        | 1        | 1        | 1        | 1.82E-05 | 0.074234  |          |
| 16 | 57246810  | 57246821  | RSRPY1                                 | 2E-07    | 1.16E-19 | 0.033898 | 1        | 0.031412 | 1        | 1        | 1        | 1        | 1        | 1        | 1        | 1        | 1        | 8.57E-13 | 1.071207  |          |
| 2  | 109404474 | 109404507 | CCDC138                                | 1.57E-11 | 4.33E-06 | 0.006697 | 1        | 1        | 1        | 1        | 1        | 1        | 1        | 1        | 1        | 1        | 1        | 2.84E-11 | 0.290924  |          |
| 2  | 173861105 | 173861120 | RAPGEF4                                | 9.32E-09 | 2.15E-05 | 1        | 1        | 1        | 1        | 1        | 1        | 0.011905 | 1        | 1        | 1        | 1        | 1        | 1.05E-17 | 0.011905  |          |
| 4  | 54256308  | 54256319  | RIP1L1                                 | 6.14E-09 | 2.59E-07 | 0.068182 | 1        | 1        | 1        | 1        | 1        | 1        | 1        | 1        | 1        | 1        | 1        | 0.000311 | 0.000889  |          |
| 4  | 104747784 | 104747795 | RIP1Z1                                 | 9.04E-07 | 7.21E-17 | 0.004604 | 0.000774 | 1        | 1        | 0.114754 | 1        | 1        | 1        | 1        | 1        | 1        | 1        | 4.3E-09  | 0.004473  |          |
| 8  | 24811831  | 24811853  | NEF                                    | 0.000749 | 0.006338 | 0.153846 | 1        | 1        | 1        | 1        | 1        | 1        | 1        | 1        | 0.049383 | 1        | 1        | 0.000323 | 0.000875  |          |
| X  | 24516919  | 24516938  | PKD3                                   | 5.62E-09 | 0.000151 | 0.035088 | 1        | 1        | 1        | 1        | 1        | 0.036697 | 0.035088 | 1        | 3.99E-13 | 0.000605 | 1        | 1        |           |          |
| 1  | 163313695 | 163313707 | NUF2                                   | 8.67E-09 | 5.94E-10 | 0.000247 | 0.071429 | 1        | 1        | 1        | 1        | 1        | 0.03125  | 1        | 2.2E-15  | 0.047619 | 0.75663  |          |           |          |
| 1  | 215768872 | 215768883 | KCTD3                                  | 1.87E-09 | 2.12E-05 | 0.08     | 1        | 1        | 1        | 1        | 1        | 1        | 1        | 1        | 1        | 1        | 1        | 1.45E-06 | 0.041667  | 0.07767  |
| 1  | 67279866  | 67279877  | WDR78                                  | 0.000306 | 0.007133 | 1        | 1        | 1        | 1        | 1        | 1        | 0.08046  | 1        | 1        | 0.010989 | 1        | 1        | 0.068966 |           |          |
| 1  | 68905367  | 68905378  | RPE65                                  | 4.63E-05 | 0.001276 | 0.047619 | 1        | 1        | 1        | 1        | 0.058824 | 1        | 1        | 1        | 0.009167 | 1        | 1        | 0.069549 |           |          |
| 1  | 57689230  | 57689241  | PRK4                                   | 9.94E-07 | 7.81E-08 | 0.096721 | 0.050848 | 0.138489 | 0.007785 | 1        | 1        | 1        | 1        | 1        | 1        | 1        | 1        | 0.02316  | 0.004473  |          |
| 15 | 86279430  | 86279457  | AKAP13                                 | 1.2E-11  | 4.29E-09 | 1        | 1        | 1        | 1        | 1        | 1        | 1        | 1        | 1        | 0.027778 | 1        | 1        | 0.000574 |           |          |
| 18 | 21644075  | 21644099  | ITIC39C                                | 0.015893 | 0.001802 | 1        | 1        | 1        | 1        | 1        | 1        | 1        | 1        | 1        | 1        | 1        | 1        | 0.000334 | 0.000117  |          |
| 4  | 15826415  | 15826426  | CD38                                   | 0.00226  | 0.000151 | 0.006452 | 1        | 1        | 1        | 1        | 1        | 0.014706 | 0.032967 | 0.415479 | 0.006721 | 0.000283 | 0.335266 |          |           |          |
| 4  | 39871117  | 39871154  | PDSSA                                  | 0.005899 | 5.8E-06  | 0.181452 | 1        | 1        | 1        | 0.00653  | 1        | 1        | 1        | 1        | 1        | 1        | 1        | 0.066456 | 1         |          |
| 5  | 72875091  | 72875102  | UTP15                                  | 6.03E-06 | 2.76E-08 | 0.001783 | 1        | 1        | 0.013514 | 1        | 1        | 1        | 1        | 1        | 1        | 1        | 1        | 1.95E-07 | 0.000179  |          |
| 7  | 6771663   | 6771664   | ZNF212(dist=25097),PMS2CL1(dist=3252)  | 3.05E-08 | 4.2E-06  | 0.010638 | 1        | 1        | 1        | 1        | 1        | 1        | 1        | 1        | 1        | 1        | 1        | 0.197674 | 0.000711  |          |
| 9  | 140006087 | 140006100 | DHPL                                   | 0.000187 | 7.21E-17 | 0.026167 | 0.178571 | 1        | 1        | 1        | 1        | 1        | 1        | 1        | 1        | 1        | 1        | 4.3E-05  | 0.045441  |          |
| 9  | 94118279  | 94118310  | ADP                                    | 0.000474 | 8.18E-05 | 0.012981 | 1        | 1        | 1        | 1        | 1        | 0.079571 | 1        | 1        | 1        | 1        | 1        | 6.7E-06  | 0.095188  | 0.167422 |
| X  | 52640310  | 52640321  | KAGE1E(dist=94113),SSX8(dist=11664)    | 3.21E-09 | 9.45E-09 | 1        | 1        | 1        | 1        | 1        | 1        | 1        | 1        | 1        | 1        | 1        | 1        | 0.000944 | 0.000861  |          |
| 1  | 39900058  | 39900076  | MCAF1                                  | 1.52E-11 | 2.83E-15 | 0.000204 | 1        | 1        | 1        | 1        | 1        | 1        | 1        | 0.05     | 1.37E-14 | 1        | 1        | 0.06015  |           |          |
| 10 | 43199666  | 43199677  | LINC01518(dist=12459),BM51(dist=78277) | 0.002852 | 5.07E-08 | 0.000806 | 1        | 1        | 0.032965 | 0.001604 | 1        | 1        | 1        | 1        | 1        | 1        | 1        | 0.003468 | 1         |          |
| 13 | 32360691  | 32360702  | RFXP2                                  | 1.7E-11  | 1        | 1        | 1        | 0.132626 | 1        | 1        | 1        | 0.046296 | 0.257086 | 1        | 0.1      | 2.16E-12 | 1        | 0.03361  |           |          |
| 13 | 53007886  | 53007897  | VP36                                   | 1.81E-05 | 1.96E-22 | 1        | 1        | 0.035714 | 1        | 1        | 1        | 1        | 1        | 1        | 1        | 1        | 1        | 0.20E-12 | 0.02641   |          |
| 15 | 62250932  | 62250943  | SLC13C                                 | 1.74E-08 | 0.000163 | 0.119318 | 1        | 1        | 1        | 0.359606 | 0.020408 | 1        | 1        | 1        | 1        | 1        | 1        | 6.25E-07 | 0.092543  |          |
| 15 | 57689230  | 57689251  | SPR5                                   | 1.0E-11  | 0.66E-35 | 1        | 0.513464 | 1        | 0.054442 | 1        | 1        | 1        | 1        | 1        | 1        | 1        | 1        | 0.000496 | 0.000496  |          |
| 17 | 58300951  | 58300962  | USP32                                  | 3.2E-05  | 2.46E-11 | 0.00303  | 1        | 1        | 1        | 1        | 1        | 1        | 1        | 1        | 1        | 1        | 1        | 5.09E-10 | 0.066667  |          |
| 2  | 215821543 | 215821563 | LOC101928103                           | 9.5E-10  | 2.43E-06 | 0.078125 | 0.007937 | 1        | 0.046154 | 1        | 1        | 1        | 1        | 1        | 1        | 1        | 1        | 0.000694 | 0.0117975 |          |
| 2  | 234746303 | 234746314 | HJURP                                  | 3.37E-06 | 1.78E-07 | 1        | 1        | 1        | 1        | 1        | 1        | 1        | 1        | 1        | 1        | 1        | 1        | 5.89E-09 | 0.04264   |          |
| 21 | 17236804  | 17236816  | USP25                                  | 1.52E-09 | 0.001423 | 1        | 1        | 1        | 1        | 1        | 1        | 1        | 1        | 1        | 1        | 1        | 1        | 4.91E-05 | 0.000903  | 0.004264 |
| 4  | 128996166 | 128996178 | LARP1B                                 | 3.06E-07 | 3.4E-08  | 0.109015 | 1        | 1        | 1        | 0.016129 | 1        | 1        | 1        | 1        | 5.95E-10 | 0.025641 | 0.227953 |          |           |          |
| 4  | 40868390  | 40868391  | AKR1                                   | 5.48E-05 | 0.000386 | 0.003171 | 1        | 1        | 0.165711 | 1        | 1        | 1        | 0.142857 | 0.0407   | 0.000496 | 1        | 1        | 0.456441 |           |          |
| 1  | 14491801  | 14491802  | NRX70,NBPF9,PDE4DIP                    | 1.46E-05 | 8.42E-11 | 0.006969 | 1        | 1        | 1        | 1        | 1        | 1        | 0.000565 | 1        | 1        | 1        | 1        | 0.000565 | 0.000496  |          |
| 15 | 37188705  | 37188717  | MEIS2                                  | 1.11E-08 | 0.154579 | 1        | 1        | 1        | 1        | 1        | 1        | 1        | 1        | 1        | 1        | 1        | 1        | 6.83E-09 | 0.04878   | 0.040133 |
| 3  | 48226193  | 48226204  | CD2C5A                                 | 2.63E-07 | 5.83E-10 | 0.096774 | 1        | 1        | 1        | 1        | 1        | 0.043478 | 2.55E-12 | 1        | 1        | 1        | 1        | 0.052288 |           |          |
| 9  | 114694383 | 114694394 | MIR4668                                | 2.48E-10 | 1.18E-18 | 0.071429 | 1        | 1        | 1        | 1        | 1        | 0.017875 | 1        | 1        | 1        | 1        | 1        | 4.11E-07 | 0.051491  |          |
| 9  | 73240335  | 73240357  | TRPM3                                  | 0.000105 | 6.02E-06 | 0.119898 | 1        | 1        | 1        | 1        | 1        | 0.037736 | 0.2      | 0.00089  | 0.051724 | 0.01961  |          |          |           |          |
| 1  | 197059221 | 197059244 | ASPM                                   | 0.00012  | 8.1E-10  | 0.046512 | 1        | 0.082718 | 1        | 1        | 0.011494 | 1        | 1        | 1        | 1        | 1        | 1        | 8.81E-07 | 0.000287  |          |
| 10 | 9648040   | 9648050   | CPVL18                                 | 3.27E-07 | 2.51E-07 | 0.010881 | 1        | 1        | 1        | 1        | 1        | 0.021869 | 1        | 1        | 1        | 1        | 1        | 9.58E-07 | 0.025259  |          |
| 12 | 112300876 | 112300891 | MANKPKS                                | 0.000446 | 6.93E-05 | 0.041667 | 1        | 1        | 1        | 0.010638 | 0.011921 | 1        | 1        | 1        | 1        | 1        | 1        | 0.000231 |           |          |
| 2  | 206997835 | 206997847 | NDUFS1                                 | 6.51E-12 | 1.64E-17 | 0.001815 | 0.008403 | 1        | 1        | 1        | 1        | 0.053571 | 0.02     | 1        | 1.31E-19 | 0.030769 | 0.000112 |          |           |          |
| 13 | 143235916 | 143235929 | SLC9A9                                 | 3.28E-07 | 5.11E-15 | 0.25     | 1        | 0.03125  | 1        | 1        | 1        | 0.030033 | 0.010422 | 1        | 0.027778 | 1        | 1        | 0.000733 |           |          |
| 4  | 155457781 | 155457826 | PLRG1                                  | 6.59E-06 | 1.08E-05 | 1        | 1        | 0.021053 | 1        | 1        | 1        | 1        | 1        | 1        | 1        | 1        | 1        | 1.5E-07  | 0.029412  |          |
| 5  | 134032954 | 134032965 | SEC24A                                 | 1.28E-07 | 5.2E-12  | 1        | 1        | 0.003764 | 1        | 1        | 1        | 1        | 1        | 1        | 1        | 1        | 1        | 2.88E-05 | 1         |          |
| 5  | 37051861  | 37051873  | NPBL                                   | 6.18E-11 | 1.15E-12 | 0.021277 | 1        | 0.03125  | 1        | 1        | 1        | 0.014286 | 1        | 1        | 1.65E-14 | 0.025316 | 0.000848 |          |           |          |
| 5  | 70754289  | 70754302  | BDP1                                   | 0        |          |          |          |          |          |          |          |          |          |          |          |          |          |          |           |          |

|     |           |           |                                             |           |           |          |          |          |          |          |          |          |          |          |          |          |          |          |          |          |          |          |
|-----|-----------|-----------|---------------------------------------------|-----------|-----------|----------|----------|----------|----------|----------|----------|----------|----------|----------|----------|----------|----------|----------|----------|----------|----------|----------|
| 1   | 151535020 | 151535045 | TUFT1                                       | 4.34E-07  | 0.003691  | 0.054054 | 1        | 1        | 1        | 1        | 1        | 1        | 1        | 1        | 1        | 1        | 1        | 1        | 0.1875   | 0.001327 | 1        | 0.250437 |
| 1   | 152539572 | 152539586 | SYNE1                                       | 1.91E-10  | 4.42E-12  | 0.005473 | 1        | 0.580256 | 0.250065 | 0.205631 | 1        | 1        | 1        | 0.39218  | 0.088235 | 0.142857 | 0.00862  | 0.05     | 0.010081 |          |          |          |
| 6   | 75929746  | 75929756  | CRISPLD1                                    | 4.63E-06  | 5.53E-14  | 1        | 1        | 1        | 1        | 1        | 1        | 0.076169 | 0.125    | 1        | 1        | 1        | 1        | 1        | 1        | 1.48E-11 | 1        | 1        |
| 11  | 89148857  | 8914903   | WXLAD2                                      | 0.95E-07  | 0.000344  | 1        | 1        | 0.159281 | 1        | 1        | 1        | 1        | 1        | 1        | 0.017544 | 0.017544 | 1        | 1        | 1        | 1        | 1        | 1        |
| 2   | 70066571  | 70066582  | SMCL1                                       | 3.99E-10  | 1.737E-08 | 0.068182 | 1        | 1        | 0.16768  | 1        | 1        | 1        | 1        | 1        | 0.105189 | 0.001357 | 0.004128 | 2.92E-05 | 0.005599 | 0.123374 | 1        | 1        |
| 1   | 64017377  | 64017388  | EFCAB7                                      | 1.54E-05  | 1.05E-05  | 0.031746 | 1        | 1        | 1        | 1        | 1        | 1        | 1        | 0.056065 | 1        | 0.016129 | 1        | 1        | 1        | 1        | 1        | 1        |
| 17  | 37575853  | 37575874  | MED1                                        | 9.67E-07  | 5.75E-06  | 0.152157 | 1        | 1        | 1        | 1        | 1        | 1        | 1        | 1        | 1        | 1        | 1        | 1        | 1        | 1.51E-07 | 0.021739 | 0.116007 |
| 9   | 33311294  | 33311306  | NFX1                                        | 3.95E-06  | 5.24E-08  | 1        | 1        | 0.062992 | 1        | 1        | 1        | 1        | 1        | 0.016529 | 0.031579 | 1        | 1        | 1        | 1        | 1        | 6.37E-10 | 0.185864 |
| 12  | 97331208  | 97331233  | NEDD1                                       | 0.048713  | 0.214026  | 0.122984 | 1        | 0.54538  | 0.102659 | 1        | 1        | 1        | 1        | 0.025095 | 1        | 0.065399 | 0.000068 | 1        | 1        | 1        | 0.535999 | 1        |
| 22  | 26889953  | 26889982  | SRDD                                        | 0.029035  | 0.153885  | 1        | 1        | 1        | 0.01282  | 1        | 1        | 1        | 1        | 0.185701 | 0.251515 | 0.1875   | 0.000253 | 1        | 1        | 1        | 0.027266 | 1        |
| 3   | 52082303  | 52091933  | GNL3                                        | 0.000005  | 0.001458  | 1        | 1        | 0.006369 | 0.172704 | 1        | 1        | 1        | 0.072917 | 1        | 1        | 1        | 1        | 1        | 1        | 5.31E-05 | 1        | 0.017821 |
| 6   | 155143561 | 155143577 | SCAF8                                       | 0.0000174 | 8.89E-35  | 1        | 1        | 1        | 1        | 1        | 1        | 1        | 1        | 1        | 1        | 1        | 1        | 1        | 1        | 7.32E-07 | 1        | 0.079280 |
| 14  | 91467393  | 91467404  | PBSGKA5                                     | 1.14E-06  | 7.15E-14  | 0.187805 | 1        | 1        | 1        | 1        | 1        | 1        | 1        | 1        | 1        | 0.03125  | 1        | 1        | 1        | 1        | 5.41E-13 | 0.012301 |
| 1   | 67516191  | 67516202  | SLC35D1                                     | 6.48E-06  | 9.56E-06  | 0.025641 | 1        | 0.391715 | 0.007879 | 1        | 1        | 1        | 0.025    | 0.343869 | 1        | 0.142857 | 1.51E-11 | 0.074051 | 0.193404 | 1        | 1        | 1        |
| 10  | 103771444 | 103771469 | C10orf76                                    | 2.99E-09  | 9.91E-14  | 1        | 1        | 1        | 1        | 1        | 1        | 1        | 1        | 0.070779 | 1        | 1        | 1        | 1        | 1        | 1        | 1E-12    | 0.051095 |
| 4   | 57686807  | 57686822  | SPNK2                                       | 1.07E-11  | 3E-14     | 0.030593 | 1        | 1        | 1        | 1        | 1        | 1        | 0.039732 | 1        | 1        | 1        | 1        | 1        | 1        | 1        | 9.97E-15 | 0.000504 |
| 5   | 38978758  | 38978770  | RICTOR                                      | 2.96E-11  | 5.57E-10  | 0.02381  | 1        | 1        | 1        | 1        | 1        | 1        | 1        | 0.008475 | 1        | 0.035088 | 0.117647 | 1.58E-09 | 0.044118 | 0.002413 | 1        | 1        |
| 11  | 89502897  | 89502936  | MTOR7(dist=50967),TRIM49(dist=28787)        | 1.58E-06  | 5.92E-05  | 0.139373 | 0.006579 | 1        | 1        | 1        | 1        | 1        | 1        | 0.044444 | 1        | 0.044444 | 1        | 3.99E-09 | 1        | 1        | 1        | 1        |
| 17  | 5234556   | 5234611   | KRNN                                        | 4.94E-12  | 4.83E-34  | 1        | 0.007874 | 1        | 1        | 1        | 1        | 0.00242  | 0.019481 | 1        | 0.017544 | 0.165144 | 0.047619 | 2.38E-11 | 0.103383 | 1        | 1        | 1        |
| 14  | 35550467  | 35550490  | LOC101927178                                | 3.88E-11  | 7.97E-11  | 0.000137 | 1        | 0.051948 | 1        | 1        | 1        | 1        | 0.02459  | 0.068947 | 0.018182 | 1        | 4.39E-11 | 0.031915 | 1        | 1        | 1        | 1        |
| 20  | 13909733  | 13909745  | SPTLC3                                      | 2.06E-08  | 5.14E-12  | 0.037662 | 0.031744 | 1        | 0.072809 | 1        | 1        | 1        | 0.146606 | 1        | 1        | 5.93E-08 | 0.000982 | 0.160236 | 1        | 1        | 1        | 1        |
| 17  | 44806139  | 44806158  | NFS                                         | 5.08E-07  | 6.54E-08  | 1        | 1        | 1        | 1        | 1        | 1        | 1        | 0.016129 | 1        | 1        | 5.03E-08 | 1        | 1        | 1        | 1        | 1        | 0.122471 |
| 3   | 47860685  | 47860696  | DHX30                                       | 2.64E-07  | 7.61E-14  | 1        | 1        | 0.073634 | 1        | 1        | 1        | 1        | 1        | 1        | 1        | 1        | 5.77E-08 | 0.065201 | 0.00389  | 1        | 1        | 1        |
| 21  | 15313079  | 15313093  | CYP4F29P(dist=92394),ANKRD201A1P(dist=3003) | 2.26E-06  | 4.17E-10  | 1        | 0.031577 | 1        | 1        | 1        | 1        | 1        | 1        | 0.154736 | 0.088195 | 1        | 0.1      | 0.060976 | 1        | 1        | 1        | 1        |
| 2   | 171862578 | 171862590 | KLK1                                        | 1.35E-08  | 2.64E-15  | 0.005772 | 1        | 1        | 0.104077 | 0.040157 | 1        | 1        | 1        | 1        | 1        | 1        | 1.31E-10 | 1        | 1        | 1        | 1        | 1        |
| 6   | 54030001  | 54030021  | ERACL1(GPR75-ASB3)                          | 0.35E-07  | 1.17E-05  | 1        | 0.054785 | 1        | 1        | 1        | 1        | 1        | 0.041096 | 1        | 1        | 1        | 1        | 1        | 1        | 7.5E-05  | 1        | 0.265774 |
| 1   | 115238016 | 115238032 | KAMP1                                       | 1.167E-09 | 1.55E-20  | 0.084288 | 1        | 0.103963 | 0.33182  | 0.040319 | 1        | 1        | 1        | 0.049005 | 0.055556 | 0.1      | 1.17E-06 | 0.111024 | 0.019098 | 1        | 1        | 1        |
| 1   | 207826095 | 207826106 | CRIL                                        | 0.000176  | 1.42E-10  | 1        | 1        | 1        | 0.173968 | 1        | 1        | 0.99427  | 0.050413 | 1        | 1        | 0.002561 | 1        | 1        | 1        | 1        | 0.31587  | 1        |
| 16  | 24820823  | 24820840  | TRNCGA6                                     | 0.000967  | 7.98E-07  | 0.22551  | 1        | 0.602348 | 1        | 0.140576 | 1        | 1        | 1        | 1        | 1        | 1        | 1        | 0.002835 | 1        | 0.059358 | 1        | 1        |
| 16  | 28883087  | 28883097  | SH2B1                                       | 0.000499  | 1.14E-11  | 1        | 1        | 1        | 1        | 1        | 1        | 0.012346 | 1        | 1        | 1        | 1        | 1.12E-08 | 1        | 1        | 1        | 1        | 1        |
| 3   | 44826303  | 44826335  | KIF15                                       | 2.03E-08  | 0.000451  | 0.044548 | 1        | 1        | 1        | 1        | 1        | 1        | 0.127138 | 1        | 1        | 0.125    | 4.04E-12 | 1        | 0.006843 | 1        | 1        | 1        |
| 4   | 89579550  | 89579561  | HERC3                                       | 0.003748  | 0.003996  | 1        | 1        | 1        | 1        | 1        | 1        | 1        | 0.025974 | 1        | 1        | 0.000809 | 0.050847 | 0.148718 | 1        | 1        | 1        | 1        |
| 17  | 6063946   | 6063949   | KM1                                         | 0.000385  | 0.000439  | 0.048547 | 1        | 1        | 1        | 1        | 0.023121 | 1        | 1        | 0.055944 | 1        | 0.42307  | 1        | 3.78E-05 | 1        | 0.047887 | 1        | 1        |
| 19  | 4297855   | 4297872   | TMGDS2                                      | 1.167E-09 | 9.93E-18  | 1        | 1        | 0.119868 | 1        | 1        | 1        | 1        | 0.15129  | 0.136175 | 1        | 1        | 0.485714 | 0.005202 | 1        | 1        | 1        | 1        |
| 1   | 53255587  | 53255601  | ZYG11B                                      | 1.45E-08  | 5.76E-07  | 0.010788 | 1        | 0.172494 | 1        | 1        | 1        | 1        | 0.000131 | 1        | 0.227273 | 3.32E-09 | 1        | 0.000114 | 1        | 1        | 1        | 1        |
| 11  | 113688357 | 113688368 | USP28                                       | 3.94E-05  | 1.43E-12  | 1        | 1        | 0.064103 | 0.140221 | 1        | 1        | 0.010204 | 0.02623  | 1        | 0.35     | 8.05E-10 | 0.039216 | 0.194331 | 1        | 1        | 1        | 1        |
| 19  | 10270725  | 10270758  | DNM1T                                       | 1.16E-05  | 1.43E-10  | 1        | 0.061947 | 0.495999 | 0.064872 | 0.085106 | 0.061699 | 0.116667 | 0.252185 | 1        | 1        | 0.001306 | 1        | 0.000354 | 1        | 0.000354 | 1        | 1        |
| 1   | 112718471 | 112718512 | GTPBP8                                      | 0.00032   | 1.48E-11  | 0.064516 | 1        | 1        | 1        | 1        | 1        | 1        | 1        | 1        | 1        | 0.000585 | 0.014925 | 0.116733 | 1        | 1        | 1        | 1        |
| 8   | 99054836  | 99054849  | RPL30                                       | 3.77E-08  | 3.84E-12  | 1        | 1        | 0.065342 | 1        | 1        | 1        | 1        | 0.006251 | 1        | 0.166667 | 1.95E-07 | 1        | 0.01928  | 1        | 1        | 1        | 1        |
| 19  | 14160686  | 14161033  | PKRX                                        | 3.94E-06  | 1.20E-06  | 0.002873 | 3.61E-05 | 1        | 0.035088 | 0.000845 | 1        | 1        | 0.055944 | 1        | 1        | 1.33E-10 | 1        | 1        | 1        | 1        | 1        | 1        |
| 1   | 11558519  | 11558591  | ELW3                                        | 1.05E-06  | 1.99E-35  | 1        | 1        | 0.069637 | 1        | 0.002019 | 1        | 1        | 0.883333 | 0.000235 | 1        | 1        | 1        | 1        | 1        | 0.188619 | 1        | 1        |
| 22  | 35719378  | 35719394  | TOM1                                        | 3.68E-08  | 6.68E-35  | 0.133333 | 0.000112 | 0.183389 | 1        | 1        | 1        | 0.041096 | 2.02E-05 | 1        | 1        | 7.95E-06 | 1        | 0.046683 | 1        | 1        | 1        | 1        |
| 4   | 8472785   | 8472805   | TRM44                                       | 4.38E-09  | 3.41E-34  | 0.00555  | 0.025889 | 1        | 1        | 0.001097 | 1        | 1        | 1        | 0.016393 | 1        | 1        | 1.75E-12 | 0.028571 | 0.067923 | 1        | 1        | 1        |
| 18  | 60025458  | 60025474  | TNFRSF11A                                   | 1.65E-07  | 1.52E-34  | 0.142857 | 1        | 0.474651 | 0.187468 | 1        | 1        | 0.024793 | 0.046478 | 1        | 1        | 4.77E-07 | 1        | 0.237923 | 1        | 1        | 1        | 1        |
| 17  | 138270744 | 138270757 | TRM24                                       | 9.61E-09  | 3.47E-31  | 0.176471 | 1        | 0.072892 | 1        | 1        | 1        | 1        | 1        | 1        | 1        | 1        | 1        | 1        | 1        | 1        | 1        | 1        |
| 4   | 44805012  | 44805045  | ERIB                                        | 0.000137  | 1.03E-30  | 0.008333 | 1        | 0.02749  | 1        | 1        | 1        | 1        | 1        | 1        | 1        | 1        | 5.7E-06  | 1        | 1        | 1        | 1        | 1        |
| 1   | 150932953 | 150932989 | RPLK1                                       | 2.72E-10  | 1.06E-30  | 0.166667 | 3.49E-05 | 1        | 0.58321  | 1        | 1        | 0.064501 | 1        | 0.23841  | 1        | 1        | 1.21E-10 | 0.028169 | 0.053973 | 1        | 1        | 1        |
| 6   | 56550477  | 56550489  | RN16-71P                                    | 3.55E-07  | 1.14E-30  | 0.022122 | 0.021447 | 0.051721 | 1        | 0.000287 | 1        | 1        | 0.83E-06 | 1        | 1        | 2.83E-06 | 1        | 0.000165 | 1        | 1        | 1        | 1        |
| 2   | 79314062  | 79314073  | REG1B                                       | 1.11E-11  | 2.58E-29  | 1        | 0.009852 | 1        | 1        | 0.013333 | 1        | 1        | 1        | 1        | 1        | 0.004158 | 1        | 1.29E-13 | 0.109994 | 0.102988 | 1        | 1        |
| 14  | 104145625 | 104145642 | KLC1                                        | 2.91E-10  | 2.95E-29  | 0.116747 | 0.058811 | 1        | 0.002063 | 1        | 0.008621 | 0.030928 | 1        | 0.058824 | 1        | 0.001422 | 0.001442 | 0.017477 | 1        | 1        | 1        | 1        |
| 11  | 47187055  | 47187087  | ARHGAP2                                     | 4.78E-07  | 5.04E-29  | 0.076923 | 0.009132 | 0.044872 | 0.06602  | 0.012245 | 1        | 0.007692 | 1        | 1        | 6.71E-05 | 1        | 0.02917  | 1        | 1        | 1        | 1        | 1        |
| 16  | 4559351   | 4559367   | HMOX2                                       | 1.64E-08  | 1.28E-28  | 0.125    | 1        | 1        | 0.035928 | 0.020305 | 1        | 1        | 0.000308 | 1        | 1        | 0.01685  | 1        | 0.014279 | 1        | 1        | 1        | 1        |
| 9   | 135773000 | 135773019 | F5C1                                        | 6.05E-09  | 2.55E-28  | 0.043043 | 1        | 1        | 1        | 1        | 1        | 1        | 1        | 1        | 1        | 1        | 1.54E-20 | 1        | 0.017305 | 1        | 1        | 1        |
| 7   | 9407251   | 9408733   | TRAF3                                       | 0.000121  | 3.64E-28  | 0.000324 | 0.072924 | 1        | 1        | 1        | 0.05245  | 1        | 0.055556 | 1        | 1        | 1        | 1.54E-20 | 1        | 0.007923 | 1        | 1        | 1        |
| 6   | 62153592  | 62153621  | PTPRG                                       | 0.000122  | 6.03E-28  | 0.008737 | 0.009804 | 0.031266 | 0.028757 | 1        | 1        | 0.067568 | 1        | 1        | 0.366667 | 1        | 1        | 1        | 0.188619 | 1        | 1        | 1        |
| X   | 100532479 | 10053205  | TAFL                                        | 1.98E-10  | 1.41E-27  | 0.156667 | 1        | 1        | 1        | 1        | 1        | 1        | 1        | 1        | 1        | 1        | 1        | 1.15E-08 | 1        | 0.180081 | 1        | 1        |
| 16  | 84907499  | 84907520  | CRISPLD2                                    | 2.88E-11  | 8.58E-27  | 0.006719 | 1        | 1        | 0.000262 | 0.119934 | 1        | 0.068027 | 0.010413 | 1        | 0.111111 | 1.85E-14 | 1        | 0.029757 | 1        | 1        | 1        | 1        |
| 5   | 140076413 | 140076436 | HARS2                                       | 4.64E-06  | 6.82E-27  | 0.166667 | 1        | 0.288938 | 1        | 0.064082 | 1        | 0.19231  | 0.047904 | 1        | 1        | 9.41E-05 | 1        | 0.044444 | 1        | 1        | 1        | 1        |
| 9</ |           |           |                                             |           |           |          |          |          |          |          |          |          |          |          |          |          |          |          |          |          |          |          |

|    |           |           |                                            |          |          |          |          |          |          |          |          |          |          |          |          |          |          |          |
|----|-----------|-----------|--------------------------------------------|----------|----------|----------|----------|----------|----------|----------|----------|----------|----------|----------|----------|----------|----------|----------|
| 3  | 10301805  | 10301816  | TATD2                                      | 8.18E-11 | 5.77E-21 | 0.103383 | 1        | 1        | 0.022346 | 1        | 1        | 0.08253  | 1        | 1        | 1.38E-09 | 0.000402 | 0.006087 |          |
| 13 | 73293238  | 73293264  | MZT1                                       | 1.69E-10 | 6.19E-21 | 0.008547 | 1        | 0.227958 | 1        | 1        | 0.012766 | 0.044439 | 1        | 1        | 0.000361 | 1        | 0.000229 |          |
| 8  | 95777578  | 95777591  | DPY19L4                                    | 6.96E-11 | 6.98E-21 | 1        | 0.004348 | 1        | 0.026738 | 1        | 1        | 1        | 1        | 1        | 8.6E-17  | 1        | 0.001033 |          |
| 7  | 24038949  | 24039032  | PC2                                        | 1.89E-08 | 7.93E-21 | 0.018455 | 1        | 1        | 0.034655 | 1        | 1        | 0.008403 | 0.05042  | 1        | 1        | 1.4E-09  | 0.04     | 1        |
| 10 | 21536939  | 21536956  | NEBL-AS1(dlist=73087),CASCI1(Dlist=246465) | 4.67E-07 | 8.74E-21 | 0.008163 | 1        | 1        | 0.027972 | 1        | 1        | 1        | 1        | 1        | 2.39E-20 | 0.05823  | 0.041459 |          |
| 17 | 72926288  | 72926300  | DTOP2                                      | 8.95E-06 | 8.86E-21 | 0.111111 | 1        | 1        | 1        | 1        | 1        | 0.034091 | 1        | 1        | 0.018174 | 0.095238 | 0.111016 |          |
| 2  | 38216766  | 38216779  | RMDN2-AS1                                  | 2.65E-09 | 9.2E-21  | 0.00058  | 1        | 0.108392 | 1        | 1        | 1        | 0.146095 | 0.029851 | 0.363636 | 4.81E-20 | 0.09147  | 0.0017   |          |
| 20 | 32803319  | 32803330  | EIF252(dlist=103234),ASIP(dlist=44841)     | 3.28E-08 | 1.15E-20 | 1        | 1        | 1        | 0.025862 | 1        | 1        | 0.035714 | 1        | 1        | 2.27E-09 | 1        | 0.057692 |          |
| 17 | 172314644 | 172314656 | DCAF17                                     | 4.59E-07 | 1.66E-20 | 1        | 1        | 1        | 0.001625 | 1        | 1        | 0.102485 | 0.023256 | 0.125    | 3.79E-06 | 0.044776 | 0.005372 |          |
| 11 | 63311954  | 63311966  | MIR3680-1,MIR3680-2                        | 2.29E-08 | 1.76E-20 | 1        | 1        | 1        | 0.022222 | 0.02193  | 1        | 1        | 1        | 1        | 0.000565 | 1        | 1        |          |
| 2  | 99766027  | 99766039  | PC4-F15,T5GA10                             | 1.37E-08 | 7.20E-21 | 0.041493 | 1        | 1        | 0.022960 | 1        | 1        | 0.052466 | 1        | 1        | 1        | 1.47E-08 | 0.048071 |          |
| 5  | 12752153  | 12752180  | SLC2A2                                     | 3.01E-08 | 2.31E-20 | 0.046264 | 1        | 1        | 0.215927 | 1        | 1        | 1        | 1        | 1        | 1.43E-13 | 0.008396 | 0.180918 |          |
| 12 | 56220974  | 56220993  | DNAIC14                                    | 7.94E-05 | 2.59E-20 | 0.452851 | 0.054852 | 0.358029 | 0.527051 | 0.106391 | 1        | 0.114656 | 0.171979 | 1        | 1        | 0.002847 | 1        | 0.134676 |
| 6  | 32155249  | 32155264  | PBX2                                       | 1.46E-06 | 3.19E-20 | 0.066667 | 1        | 1        | 0.025253 | 0.0125   | 1        | 1        | 0.04     | 1        | 1        | 1.82E-12 | 0.05     | 1        |
| 1  | 67098849  | 67098875  | SGIP1                                      | 0.000123 | 3.25E-20 | 1        | 1        | 1        | 0.217855 | 1        | 1        | 1        | 1        | 1        | 6.11E-08 | 0.044118 | 1        |          |
| 16 | 53496428  | 53496451  | RBL2                                       | 1.41E-08 | 3.42E-20 | 1        | 1        | 1        | 0.026882 | 1        | 1        | 0.002388 | 1        | 0.181818 | 1.42E-15 | 0.041096 | 0.019022 |          |
| 12 | 16052767  | 16052780  | STRAP                                      | 1.16E-11 | 3.8E-20  | 1        | 1        | 0.005367 | 1        | 1        | 1        | 0.034333 | 1        | 1        | 1.56E-08 | 1        | 0.018098 |          |
| 12 | 57032216  | 57032235  | ATP8B                                      | 5.23E-11 | 4.65E-20 | 3.61E-05 | 1        | 1        | 0.042483 | 0.007299 | 1        | 0.196068 | 1        | 1        | 1        | 6.3E-08  | 1        | 1        |
| 16 | 15758514  | 15758530  | NDR1                                       | 0.000491 | 4.65E-20 | 1        | 1        | 1        | 0.08486  | 1        | 1        | 1        | 1        | 1        | 1        | 0.001282 | 1        | 0.000871 |
| 3  | 14696955  | 14696967  | CCDC174                                    | 6.17E-12 | 6.56E-20 | 0.00024  | 1        | 1        | 0.096707 | 1        | 1        | 1        | 1        | 1        | 1        | 1        | 0.201212 | 1        |
| 15 | 129070812 | 129070838 | ADAMTS19                                   | 8.15E-08 | 6.76E-20 | 0.066667 | 0.005348 | 1        | 1        | 1        | 1        | 0.044118 | 0.061856 | 0.045455 | 1        | 4.14E-08 | 1        | 0.075472 |
| 14 | 62016387  | 62016398  | PKRCH                                      | 9.33E-11 | 7.11E-20 | 0.0625   | 1        | 1        | 0.091778 | 0.035317 | 1        | 1        | 1        | 1        | 7.46E-05 | 1        | 1        |          |
| 12 | 120800692 | 120800703 | TAF2                                       | 4.31E-12 | 7.87E-20 | 0.074746 | 1        | 1        | 0.00021  | 1        | 1        | 0.030769 | 0.297715 | 1        | 1        | 2.82E-12 | 0.013333 | 0.001707 |
| 11 | 49196555  | 49196567  | FOLH1                                      | 2.39E-11 | 8.9E-20  | 9.19E-05 | 1        | 1        | 0.020134 | 0.02941  | 1        | 0.022727 | 8E-05    | 1        | 1        | 1.11E-10 | 0.001586 | 0.000114 |
| 2  | 103281540 | 103281552 | SLC9A2                                     | 2.98E-09 | 1.08E-19 | 0.199385 | 0.006452 | 0.009484 | 0.153551 | 1        | 1        | 0.004158 | 0.019231 | 0.066667 | 6.19E-06 | 0.015873 | 0.005599 |          |
| 14 | 24718668  | 24718681  | PC2                                        | 1.89E-08 | 7.93E-21 | 0.018455 | 1        | 1        | 0.034655 | 0.049115 | 1        | 0.02951  | 1        | 1        | 0.166667 | 1        | 0.109945 |          |
| 12 | 109701959 | 109701975 | ACACB                                      | 3.21E-07 | 1.19E-19 | 0.222222 | 0.027624 | 0.003011 | 0.173473 | 1        | 0.042857 | 1        | 1        | 1        | 0.000732 | 1        | 1        |          |
| 10 | 75172756  | 75172771  | CRY2                                       | 1.55E-11 | 1.23E-19 | 0.020719 | 1        | 0.23052  | 0.221958 | 0.014963 | 0.067797 | 0.000826 | 0.202537 | 1        | 0.214286 | 2.52E-10 | 0.028169 | 0.005998 |
| 20 | 26802633  | 26802648  | APBB1P                                     | 1.11E-05 | 1.29E-19 | 0.000117 | 0.032086 | 0.201997 | 0.140221 | 0.156623 | 1        | 0.012821 | 7.85E-10 | 1        | 0.017047 | 0.171047 | 0.271764 |          |
| 2  | 218610662 | 218610680 | TGBF2                                      | 8.83E-11 | 1.33E-19 | 0.009231 | 0.023715 | 0.173494 | 0.08893  | 2.56E-05 | 1        | 0.072924 | 1        | 1        | 1        | 1.28E-06 | 1        | 0.461193 |
| 12 | 114500276 | 114500287 | SLC35F5                                    | 8.88E-11 | 1.53E-19 | 0.054054 | 0.026771 | 0.139558 | 1        | 0.027777 | 1        | 1        | 1        | 1        | 1        | 1.81E-13 | 1        | 0.007363 |
| 17 | 35550269  | 35550290  | ACACA                                      | 7.74E-10 | 1.57E-19 | 1        | 1        | 1        | 1        | 1        | 1        | 0.054054 | 0.062004 | 0.222222 | 1.61E-19 | 0.003049 | 0.024906 |          |
| 1  | 93201006  | 93201019  | ANGEL9                                     | 0.000408 | 1.57E-19 | 0.133333 | 1        | 1        | 0.09035  | 0.013793 | 1        | 0.0011   | 1        | 1        | 1        | 1        | 0.00385  | 1        |
| 1  | 213180434 | 213180459 | ANGEL2                                     | 8.47E-12 | 2.37E-19 | 0.005348 | 0.065602 | 1        | 0.97E-05 | 1        | 0.014337 | 0.028267 | 0.000838 | 1        | 1        | 1.22E-06 | 1        | 0.01047  |
| 4  | 48529683  | 48529699  | FRYL                                       | 3.37E-11 | 2.41E-19 | 0.018281 | 1        | 0.479895 | 0.128408 | 1        | 1        | 0.006897 | 1        | 1        | 4.1E-08  | 1        | 6.3E-05  |          |
| 12 | 121013744 | 121013756 | DEPTOR                                     | 2.08E-11 | 2.42E-19 | 0.330435 | 0.014706 | 1        | 1        | 1        | 1        | 0.038462 | 1        | 1        | 1        | 1.14E-07 | 1        | 0.103891 |
| 11 | 47840864  | 47840879  | NUP160                                     | 5.28E-08 | 3.78E-19 | 0.070779 | 1        | 1        | 0.036895 | 1        | 1        | 0.286019 | 0.071429 | 1        | 2.35E-09 | 1        | 0.000595 |          |
| 2  | 100060890 | 100060910 | EIF5B                                      | 8.68E-12 | 4.67E-19 | 0.074627 | 1        | 1        | 0.050243 | 1        | 1        | 0.046154 | 0.333333 | 1        | 2.8E-19  | 1        | 0.349697 |          |
| 11 | 118884009 | 118884025 | CCDC84                                     | 5.85E-11 | 5.19E-19 | 0.003246 | 1        | 1        | 0.047755 | 1        | 1        | 0.028986 | 1        | 1        | 5.09E-26 | 0.126618 | 0.061080 |          |
| 15 | 45060321  | 45060341  | OPNBP2                                     | 0.001021 | 4.84E-19 | 1        | 1        | 1        | 6.6E-05  | 1        | 1        | 0.0011   | 1        | 1        | 1.32E-10 | 1        | 0.021927 |          |
| X  | 100530312 | 100530326 | TAF7L                                      | 3.92E-07 | 5.99E-19 | 1        | 1        | 0.366988 | 0.000118 | 0.00157  | 1        | 0.027778 | 1        | 1        | 0.00986  | 1        | 0.041874 |          |
| 6  | 148761410 | 148761421 | SASH1                                      | 9.99E-09 | 6.09E-19 | 0.045455 | 1        | 0.031737 | 0.012658 | 1        | 1        | 0.095183 | 0.027397 | 1        | 2.64E-10 | 0.04     | 0.000248 |          |
| 4  | 187560860 | 187560871 | FAT1                                       | 4.7E-06  | 6.14E-19 | 0.026316 | 1        | 1        | 0.001947 | 0.03125  | 1        | 0.065359 | 1        | 1        | 8.31E-13 | 1        | 0.009825 |          |
| 2  | 27892022  | 27892033  | SLCA1A1P                                   | 1.95E-09 | 6.22E-19 | 0.051282 | 0.028267 | 1        | 0.025316 | 1        | 1        | 0.058824 | 1        | 1        | 1        | 1.79E-07 | 1        | 0.084656 |
| 18 | 52927275  | 52927286  | TCF4                                       | 0.000926 | 6.94E-19 | 0.153627 | 1        | 1        | 1        | 1        | 1        | 1        | 1        | 1        | 1        | 7.14E-06 | 1        | 0.084656 |
| 10 | 36369450  | 36369462  | APP1P                                      | 4.97E-10 | 7.13E-19 | 0.033898 | 1        | 1        | 0.029126 | 1        | 1        | 1        | 1        | 1        | 3.32E-08 | 0.030612 | 1        |          |
| 7  | 79655915  | 79655929  | MIR368P(dlist=8130),ZFPEV1(dlist=47903)    | 1.22E-09 | 8.56E-19 | 0.22819  | 1        | 0.147513 | 0.033262 | 1        | 0.02381  | 1        | 1        | 1        | 4.12E-10 | 0.144944 | 0.006826 |          |
| 7  | 26900079  | 26900091  | PLA2                                       | 2.58E-08 | 8.76E-19 | 0.133333 | 0.034668 | 1        | 0.053563 | 1        | 1        | 0.025649 | 1        | 1        | 2.51E-10 | 1        | 0.002443 |          |
| 15 | 30406088  | 30406103  | ULKAP3                                     | 9.7E-12  | 9E-19    | 0.041353 | 1        | 1        | 1        | 1        | 1        | 1        | 1        | 1        | 2.04E-15 | 1        | 0.000534 |          |
| 7  | 26411416  | 26411434  | SNX10                                      | 1.2E-05  | 9.36E-19 | 1        | 1        | 0.033613 | 1        | 1        | 1        | 0.096053 | 1        | 1        | 0.004757 | 1        | 0.123905 |          |
| 9  | 33056971  | 33056996  | SMU1                                       | 9.67E-06 | 9.97E-19 | 1        | 0.020565 | 1        | 0.106888 | 1        | 0.008197 | 0.078947 | 0.315789 | 2.1E-07  | 1        | 0.071921 |          |          |
| 14 | 92076810  | 92076822  | CATSPERB                                   | 1.57E-07 | 1.05E-18 | 1        | 0.236519 | 1        | 0.027397 | 1        | 1        | 0.019161 | 1        | 1        | 3.06E-12 | 1        | 0.002789 |          |
| 6  | 152702062 | 152702073 | SYNE1-AS1                                  | 5.2E-06  | 1.3E-18  | 0.020833 | 1        | 0.2      | 1        | 1        | 0.035714 | 1        | 1        | 1        | 5.34E-09 | 1        | 0.002941 |          |
| 12 | 6964518   | 6964519   | TM6D                                       | 0.21E-09 | 1.33E-18 | 0.291424 | 0.017977 | 1        | 0.037398 | 0.017778 | 1        | 0.044586 | 1        | 1        | 2.33E-10 | 1        | 0.056462 |          |
| 9  | 13552380  | 135523704 | DDX31                                      | 1.51E-11 | 1.4E-18  | 0.016667 | 1        | 1        | 0.072659 | 1        | 1        | 0.015152 | 1        | 1        | 1        | 1        | 7.46E-07 |          |
| 13 | 11453412  | 11453443  | TMEM205                                    | 2.36E-06 | 1.57E-18 | 1        | 1        | 0.036585 | 0.02193  | 1        | 1        | 1        | 1        | 1        | 0.00145  | 0.027778 | 1        |          |
| 14 | 81448951  | 81448962  | TSHR                                       | 8.17E-06 | 1.57E-18 | 0.140212 | 0.060227 | 1        | 0.000592 | 0.034283 | 1        | 0.47702  | 0.175476 | 1        | 0.21E-07 | 0.101215 | 0.187805 |          |
| 3  | 57632004  | 57632015  | DNEM6A                                     | 1.27E-08 | 1.95E-18 | 0.257217 | 0.017429 | 1        | 0.069286 | 1        | 1        | 1        | 1        | 1        | 1.32E-14 | 1        | 0.214475 |          |
| 19 | 44662274  | 44662288  | TENN234                                    | 7.49E-06 | 2.01E-18 | 0.2      | 0.03012  | 0.028565 | 1        | 0.091787 | 1        | 0.065918 | 1        | 0.042553 | 1        | 2.8E-09  | 0.048387 | 0.002801 |
| 17 | 65720150  | 65720161  | NOL11                                      | 1.82E-06 | 2.32E-18 | 0.058824 | 1        | 1        | 0.014085 | 1        | 1        | 1        | 1        | 1        | 0.034832 | 1        | 0.144442 |          |
| 16 | 69385403  | 69385421  | TM6D                                       | 1.12E-05 | 2.33E-18 | 0.12234  | 0.037313 | 1        | 0.012448 | 1        | 1        | 0.032258 | 1        | 1        | 3.62E-06 | 1        | 8.3E-06  |          |
| 5  | 51176619  | 51176631  | GALL1                                      | 1.44E-09 | 3.02E-18 | 0.002399 | 1        | 0.020408 | 1        | 1        | 0.044444 | 1        | 1        | 1        | 0.003478 | 0.023787 | 0.069914 |          |
| 6  | 151046112 | 151046124 | NUR1                                       | 2.49E-08 | 2.53E-18 | 0.001695 | 1        | 0.025974 | 0.022831 | 1        | 0.008475 | 1        | 1        | 1        | 1.92E-08 | 0.040816 | 0.000651 |          |
| 15 | 154489255 | 154489267 | IPCEF1,OPRML1                              | 2.65E-11 | 2.58E-18 | 1        | 0.041648 | 0.060962 | 1        | 1        | 0.000435 | 1        | 1        | 1        | 1.42E-09 | 0.034091 | 0.056452 |          |
| 10 | 116735234 | 116735260 | TRUB1                                      | 7.15E-06 | 2.98E-18 | 1        | 1        | 0.026316 | 1        | 1        | 0.026316 | 1        | 1        | 1        | 0.000567 | 0.125    | 1        |          |
| 10 | 104120731 | 104120750 | GFB1                                       | 0.001549 | 3.07E-18 | 0.212121 | 0.064935 | 1        | 1        | 1        | 0.162921 | 1        | 1        | 1        | 0.000555 | 0.02     | 0.029853 |          |
| 13 | 10429902  |           |                                            |          |          |          |          |          |          |          |          |          |          |          |          |          |          |          |



|    |           |             |                                     |          |          |          |          |          |          |          |          |          |          |          |          |          |          |          |
|----|-----------|-------------|-------------------------------------|----------|----------|----------|----------|----------|----------|----------|----------|----------|----------|----------|----------|----------|----------|----------|
| 10 | 122630877 | 122630889   | MRS594                              | 8.56E-06 | 1.5E-16  | 0.002775 | 6.35E-05 | 1        | 0.040323 | 1        | 1        | 0.011628 | 7.98E-05 | 0.074074 | 1        | 4.73E-06 | 1        | 0.014545 |
| 16 | 16121245  | 16121577    | IFT140                              | 5.96E-08 | 1.56E-16 | 0.012987 | 1        | 1        | 0.033058 | 1        | 1        | 1        | 1        | 1        | 1        | 2.47E-08 | 1        | 0.201622 |
| 12 | 989800    | 989815      | WNK1                                | 1.76E-07 | 1.68E-16 | 1        | 0.126303 | 1        | 0.014769 | 0.228381 | 0.056604 | 0.034483 | 4.06E-06 | 0.272727 | 0.000247 | 1        | 1        | 1        |
| 1  | 11517271  | 11519339    | PRKX1                               | 6.12E-08 | 3.67E-16 | 0.003896 | 0.011236 | 1        | 0.084299 | 1        | 1        | 0.029213 | 0.002295 | 1        | 0.029213 | 1        | 0.109926 | 1        |
| 1  | 161721402 | 161721434   | DUSP12                              | 3.04E-09 | 1.75E-16 | 0.042553 | 1        | 0.05303  | 1        | 0.019704 | 1        | 1        | 0.042735 | 1        | 1        | 2.81E-12 | 0.018866 | 0.012739 |
| 2  | 9515099   | 9515114     | ASAP2                               | 4.33E-08 | 1.83E-16 | 0.195254 | 1        | 1        | 0.048379 | 1        | 1        | 0.050336 | 1        | 1        | 1        | 1.24E-09 | 0.018182 | 1        |
| 1  | 151955791 | 151955814   | S100A10                             | 2.48E-07 | 1.91E-16 | 1        | 1        | 1        | 0.025641 | 1        | 1        | 1        | 1        | 1        | 1        | 0.007781 | 0.025136 | 0.021532 |
| 18 | 56279052  | 56279066    | ALPK2                               | 5.54E-06 | 2.01E-16 | 0.213675 | 1        | 0.096491 | 0.014019 | 0.015075 | 1        | 1        | 1        | 1        | 1        | 1.38E-08 | 1        | 0.001368 |
| 5  | 65088487  | 65088503    | NLN                                 | 8.14E-05 | 2.08E-16 | 1        | 1        | 0.096774 | 1        | 0.047238 | 1        | 1        | 1        | 0.018182 | 1        | 1        | 1        | 0.000246 |
| 1  | 17908419  | 17908431    | ABL2                                | 3.94E-09 | 2.16E-16 | 0.044444 | 1        | 1        | 0.046915 | 1        | 1        | 0.153846 | 1        | 1        | 1        | 0.000117 | 1        | 0.000171 |
| 1  | 53373454  | 53373467    | FSAD                                | 6.32E-08 | 2.76E-16 | 1        | 1        | 1        | 1        | 1        | 1        | 0.044489 | 1        | 1        | 1        | 4.1E-05  | 1        | 0.023423 |
| 1  | 184692999 | 184693020   | EDMB3                               | 1.66E-09 | 2.18E-16 | 0.083333 | 1        | 0.040198 | 1        | 1        | 1        | 0.022556 | 0.000342 | 1        | 1        | 1.45E-07 | 1        | 1        |
| 21 | 42838093  | 42838104    | TMFRS2                              | 3.32E-09 | 2.28E-16 | 0.283838 | 0.005714 | 1        | 0.056526 | 0.016949 | 1        | 1        | 1        | 1        | 1        | 2.81E-12 | 0.025316 | 1        |
| 12 | 7889886   | 7889934     | CLEC4C                              | 4.85E-05 | 2.28E-16 | 0.050568 | 0.036145 | 1        | 1        | 0.084834 | 1        | 1        | 1        | 0.041667 | 1        | 0.000825 | 0.055556 | 0.230408 |
| 10 | 76349020  | 76349033    | ADK                                 | 8.71E-11 | 2.37E-16 | 0.000511 | 1        | 1        | 0.005603 | 1        | 1        | 0.009009 | 0.010107 | 0.032258 | 1        | 1.09E-08 | 0.054414 | 0.01291  |
| 12 | 54676165  | 54676176    | HNRNP1A1                            | 5.82E-06 | 2.42E-16 | 0.040816 | 0.012346 | 1        | 0.025    | 1        | 1        | 0.010695 | 0.063987 | 1        | 1        | 1.09E-05 | 1        | 0.017488 |
| 22 | 31985385  | 31985398    | SFI1                                | 3.22E-07 | 2.44E-16 | 0.145299 | 1        | 1        | 0.000149 | 1        | 1        | 0.055556 | 1        | 1        | 1        | 0.000993 | 1        | 0.009483 |
| 12 | 129566284 | 129566302   | TMEM132D                            | 1.49E-07 | 2.52E-16 | 0.022569 | 1        | 1        | 1        | 1        | 0.045045 | 0.014141 | 0.070175 | 0.065359 | 1        | 4.78E-16 | 0.124875 | 0.15526  |
| 4  | 68416393  | 68416409    | CENPF(dlist=5137),STAP1(dlist=8037) | 2.23E-08 | 2.58E-16 | 1        | 0.108979 | 1        | 0.120554 | 0.10097  | 1        | 1        | 0.007064 | 0.023256 | 1        | 0.041667 | 0.038988 | 1        |
| 17 | 7700419   | 7700420     | DNAH2                               | 0.414628 | 2.73E-16 | 0.058824 | 0.007634 | 0.11171  | 1        | 1        | 1        | 1        | 1        | 1        | 1        | 0.000106 | 1        | 0.000694 |
| 5  | 179032860 | 179032871   | RUFY1                               | 1.48E-06 | 2.74E-16 | 1        | 0.008889 | 1        | 0.02139  | 1        | 1        | 0.018349 | 1        | 0.03125  | 1        | 1.51E-06 | 1        | 0.003615 |
| 11 | 14501267  | 14501282    | COPB1                               | 9.35E-11 | 2.81E-16 | 0.0625   | 1        | 1        | 0.000109 | 1        | 1        | 1        | 1        | 1        | 1        | 5.33E-14 | 0.03125  | 0.050139 |
| 17 | 8397208   | 8397219     | MYH10                               | 2.01E-08 | 2.81E-16 | 0.055556 | 1        | 1        | 1        | 1        | 1        | 0.075758 | 0.067212 | 1        | 1        | 6.99E-10 | 0.045455 | 0.147325 |
| 19 | 4430524   | 4430535     | CHAF1A                              | 1.19E-06 | 2.84E-16 | 1        | 0.127138 | 1        | 0.015075 | 1        | 1        | 0.027778 | 1        | 1        | 1        | 2.05E-05 | 1        | 0.027273 |
| 12 | 56994331  | 56994349    | BAZ2A                               | 1.55E-07 | 2.87E-16 | 1        | 0.009091 | 1        | 0.079967 | 0.01992  | 1        | 1        | 0.044444 | 1        | 1        | 2.11E-06 | 1        | 0.051997 |
| 1  | 45976028  | 45976039    | PRKX1                               | 3.69E-06 | 3.04E-16 | 0.034677 | 1        | 1        | 0.044444 | 1        | 1        | 0.005466 | 1        | 1        | 1        | 3.02E-02 | 1        | 0.013424 |
| 12 | 26816832  | 26816843    | TPR2                                | 0.001014 | 3.09E-16 | 1        | 1        | 1        | 0.010753 | 1        | 1        | 1        | 1        | 1        | 1        | 0.000212 | 1        | 0.065    |
| 1  | 207930564 | 207930575   | CD46                                | 7.17E-06 | 3.09E-16 | 0.011858 | 0.014388 | 1        | 0.030612 | 1        | 1        | 1        | 1        | 1        | 1        | 0.003289 | 1        | 1        |
| 8  | 94817177  | 94817188    | TMEM67                              | 2.43E-11 | 3.41E-16 | 0.037736 | 0.010753 | 0.114286 | 1        | 0.016393 | 1        | 1        | 0.074627 | 1        | 1        | 2.74E-12 | 1        | 1        |
| 12 | 103828911 | 103828922   | ORCS                                | 2.04E-06 | 3.49E-16 | 1        | 1        | 0.013889 | 0.01905  | 1        | 1        | 1        | 1        | 1        | 1        | 1.08E-05 | 1        | 1        |
| 19 | 8438454   | 8438467     | ANGPTL4                             | 0.000204 | 3.51E-16 | 1        | 1        | 1        | 1        | 1        | 1        | 0.002504 | 1        | 1        | 1        | 1        | 1        | 0.014925 |
| 11 | 43419087  | 43419132    | TRAF7                               | 4.61E-09 | 3.62E-16 | 1        | 1        | 1        | 1        | 1        | 0.014493 | 1        | 1        | 1        | 1        | 0.000333 | 1        | 0.02728  |
| 19 | 3908592   | 3908600     | PLKNG2                              | 1.43E-08 | 3.64E-16 | 0.313715 | 1        | 1        | 1        | 1        | 1        | 1        | 1        | 1        | 1        | 0.01667  | 0.086957 | 0.056405 |
| 4  | 5597648   | 55976961    | KOR                                 | 1.14E-11 | 3.86E-16 | 0.000735 | 1        | 0.068221 | 0.196535 | 1        | 1        | 0.03463  | 1        | 1        | 1        | 9.64E-06 | 1        | 0.01174  |
| 13 | 130761525 | 130761543   | TMEM200A                            | 4.52E-09 | 3.87E-16 | 0.06383  | 1        | 0.080292 | 0.073659 | 0.012146 | 1        | 1        | 1        | 1        | 1        | 9.64E-06 | 1        | 1        |
| 3  | 195022926 | 195022944   | ACA2P                               | 9.7E-07  | 3.93E-16 | 0.006209 | 1        | 0.163807 | 0.092303 | 0.013043 | 1        | 0.152871 | 1        | 1        | 1        | 1.43E-11 | 1        | 0.18614  |
| 6  | 79656600  | 79656611    | PHIP                                | 1.45E-09 | 4.04E-16 | 0.006734 | 1        | 1        | 1        | 1        | 1        | 1        | 1        | 1        | 1        | 8.71E-10 | 1        | 0.01168  |
| 21 | 17238572  | 17238582    | USP25                               | 5.42E-05 | 4.16E-16 | 1        | 0.03463  | 0.017501 | 0.000229 | 1        | 1        | 1        | 1        | 1        | 1        | 1.07E-07 | 0.03707  | 0.0875   |
| 1  | 22030891  | 22030902    | USP48                               | 1.14E-08 | 4.22E-16 | 1        | 0.01105  | 1        | 0.021277 | 1        | 1        | 0.009615 | 1        | 0.017241 | 1        | 0.007508 | 0.039474 | 0.15308  |
| 15 | 84587271  | 84587283    | NUMA3L3                             | 3.67E-07 | 4.76E-16 | 0.061204 | 1        | 1        | 1        | 1        | 0.037207 | 1        | 0.032781 | 1        | 1        | 3.02E-02 | 0.038961 | 0.049057 |
| X  | 153714027 | 153714038   | NUMA4                               | 0.000192 | 4.71E-16 | 1        | 0.133333 | 1        | 0.024793 | 0.027397 | 1        | 0.002283 | 1        | 0.214286 | 0.000379 | 1        | 0.413055 | 1        |
| 2  | 96994050  | 96994061    | ITPR1L1                             | 0.0001   | 4.75E-16 | 1        | 1        | 1        | 0.015    | 1        | 1        | 0.213495 | 1        | 1        | 1        | 6.45E-08 | 1        | 1        |
| 13 | 41382557  | 41382568    | PIE2P5                              | 1.11E-05 | 4.78E-16 | 0.025    | 1        | 1        | 0.019737 | 1        | 0.016949 | 1        | 1        | 0.333333 | 0.0004   | 0.050847 | 0.003591 | 1        |
| X  | 11200070  | 11200086    | ARHGAP6                             | 1.49E-10 | 4.83E-16 | 0.028894 | 1        | 0.208829 | 0.164334 | 1        | 1        | 0.000912 | 1        | 1        | 1        | 8.51E-15 | 1        | 0.075874 |
| 5  | 179150788 | 179150800   | CANX                                | 4.23E-08 | 4.83E-16 | 0.04878  | 0.01     | 1        | 0.013605 | 0.001636 | 1        | 1        | 0.024808 | 1        | 0.263158 | 1.39E-16 | 1        | 0.056064 |
| 11 | 19051446  | 19051588    | LSP1                                | 5.48E-09 | 4.92E-16 | 0.153846 | 0.040268 | 0.241783 | 0.078912 | 1        | 0.004030 | 0.132655 | 1        | 1        | 0.037555 | 1        | 0.030409 |          |
| 13 | 3838867   | 38052907    | GNL2                                | 3.67E-11 | 5.07E-16 | 0.067212 | 1        | 0.017896 | 0.01     | 0.044112 | 1        | 0.082018 | 0.177737 | 1        | 1        | 5.46E-05 | 0.055164 | 0.01303  |
| 12 | 130046810 | 12100553    | PRKX1                               | 0.000683 | 5.04E-16 | 0.016158 | 0.055545 | 0.085136 | 0.002489 | 0.001493 | 1        | 0.005862 | 1        | 1        | 1        | 0.018253 | 1        | 0.05825  |
| 4  | 72726593  | 72726604    | CDC158                              | 4.48E-08 | 5.08E-16 | 1        | 0.260629 | 0.037838 | 1        | 1        | 1        | 0.04386  | 0.014925 | 1        | 1        | 3.4E-13  | 1        | 0.00879  |
| 15 | 49926993  | 49927013    | DDIT2                               | 6.81E-05 | 5.74E-16 | 0.001783 | 1        | 1        | 1        | 1        | 1        | 0.037037 | 1        | 0.01181  | 1        | 0.130264 | 1        | 1        |
| 2  | 42776699  | 42776711    | FOXJ3                               | 4.88E-12 | 5.84E-16 | 0.048387 | 0.028707 | 1        | 0.194884 | 1        | 0.014286 | 1        | 0.029851 | 1        | 1        | 3.77E-24 | 0.021978 | 0.030085 |
| 1  | 120712718 | 120712731   | PTPN4                               | 7.53E-12 | 5.86E-16 | 0.068182 | 1        | 1        | 0.044316 | 0.07996  | 1        | 0.014085 | 0.003401 | 1        | 0.153846 | 4.45E-07 | 1        | 0.000609 |
| 15 | 65412325  | 65412337    | PDCD7                               | 9.06E-07 | 5.95E-16 | 1        | 0.064935 | 0.037497 | 1        | 0.004329 | 0.18519  | 0.004419 | 1        | 1        | 1        | 0.007628 | 1        | 0.141075 |
| 6  | 49459994  | 49460005    | PCPD                                | 6.7E-11  | 5.93E-16 | 1        | 0.006098 | 1        | 1        | 1        | 1        | 0.037207 | 1        | 1        | 1        | 5.46E-05 | 0.001093 | 0.01368  |
| 5  | 58792080  | 58792095    | C5orf67                             | 2.69E-09 | 6.64E-16 | 0.13392  | 1        | 0.14977  | 1        | 1        | 0.090837 | 0.003864 | 1        | 1        | 1        | 3.7E-11  | 0.000730 | 0.067419 |
| 19 | 41895839  | 41895854    | EXOSC5                              | 0.012401 | 6.25E-16 | 1        | 1        | 1        | 0.041771 | 1        | 1        | 0.066038 | 1        | 1        | 1        | 5.02E-07 | 0.058824 | 0.005821 |
| 10 | 98412329  | 98412342    | PKAF1P                              | 2.51E-07 | 6.29E-16 | 0.176471 | 1        | 1        | 1        | 1        | 1        | 0.037433 | 0.068966 | 0.001709 | 1        | 1        | 1        | 1        |
| 1  | 22837586  | 22837604    | ZBTB40                              | 3.55E-08 | 6.31E-16 | 0.008772 | 1        | 1        | 0.013035 | 1        | 1        | 0.002675 | 1        | 0.2      | 4.3E-05  | 0.087391 | 0.171569 | 1        |
| 1  | 158298679 | 158298691   | CD18                                | 1.31E-11 | 6.71E-16 | 0.005288 | 0.010309 | 1        | 0.035176 | 0.032724 | 1        | 1        | 0.04918  | 1        | 1        | 1.41E-11 | 0.02439  | 1        |
| 10 | 90983403  | 90983415    | LIPA                                | 3.21E-09 | 6.87E-16 | 0.074746 | 1        | 0.15361  | 1        | 0.019512 | 1        | 0.021053 | 1        | 1        | 1        | 8.52E-14 | 1        | 0.184325 |
| 11 | 115049203 | 115049221   | DYX1C1                              | 1.15E-06 | 7.28E-16 | 0.0425   | 1        | 1        | 0.095769 | 1        | 0.017699 | 1        | 1        | 1        | 0.005299 | 1        | 0.133921 | 1        |
| 12 | 114837210 | 114837235   | TRK5                                | 3.63E-07 | 7.47E-16 | 0.004049 | 0.027272 | 0.038222 | 0.045839 | 0.063273 | 1        | 0.025316 | 0.064482 | 1        | 0.076929 | 0.000379 | 0.088959 | 0.07183  |
| 1  | 180757007 | 180757018   | KPR1                                | 3.14E-05 | 7.44E-16 | 0.261084 | 1        | 1        | 0.073232 | 1        | 0.019353 | 1        | 1        | 1        | 1        | 1.24E-16 | 1        | 0.267579 |
| 7  | 20826270  | 20826284    | SP8                                 | 6.83E-11 | 7.54E-16 | 0.086957 | 1        | 1        | 0.005236 | 1        | 1        | 0.037376 | 1        | 1        | 1        | 1.47E-18 | 0.000439 | 0.054493 |
| 7  | 130927780 | 130927804   | MKLN1                               | 7.34E-06 | 7.55E-16 | 1        | 1        | 1        | 1        | 1        | 1        | 1        | 1        | 1        | 1        | 2.36E-04 | 1        | 1        |
| 2  | 176995682 | 176995693</ |                                     |          |          |          |          |          |          |          |          |          |          |          |          |          |          |          |

|    |           |           |                                    |          |          |          |          |          |          |          |          |          |          |          |          |          |          |          |          |          |          |          |
|----|-----------|-----------|------------------------------------|----------|----------|----------|----------|----------|----------|----------|----------|----------|----------|----------|----------|----------|----------|----------|----------|----------|----------|----------|
| 6  | 168348504 | 168348521 | MLLT4                              | 9.66E-07 | 8.02E-15 | 0.022222 | 1        | 1        | 0.103952 | 0.061479 | 1        | 1        | 1        | 0.001053 | 0.265082 | 1        | 0.181818 | 6.07E-08 | 1        | 0.380836 |          |          |
| 20 | 271204    | 271226    | C2orf96                            | 2.41E-11 | 8.04E-15 | 0.007317 | 1        | 1        | 1        | 1        | 1        | 1        | 1        | 1        | 0.013333 | 1        | 1        | 1.59E-23 | 1        | 1        |          |          |
| 2  | 12860827  | 128608284 | POUR2D                             | 3.87E-11 | 8.21E-15 | 0.082447 | 1        | 1        | 1        | 1        | 1        | 1        | 1        | 0.127138 | 0.025336 | 0.054054 | 0.045796 | 2.7E-12  | 0.105195 | 0.00114  |          |          |
| 21 | 47663899  | 47663903  | UNC95A1                            | 1.14E-10 | 8.66E-15 | 0.000000 | 1        | 1        | 1        | 1        | 1        | 1        | 1        | 0.068914 | 1        | 1        | 1        | 1.31E-05 | 1        | 0.23275  |          |          |
| 10 | 12215870  | 12215884  | NUDT5                              | 2.14E-10 | 8.87E-15 | 0.008547 | 1        | 1        | 1        | 0.002395 | 0.009043 | 1        | 1        | 1        | 1        | 1        | 1        | 1.27E-08 | 1        | 0.009656 |          |          |
| 11 | 55339545  | 55339556  | ORMC16                             | 1.14E-11 | 8.88E-15 | 0.056604 | 1        | 1        | 1        | 1        | 0.018111 | 1        | 1        | 1        | 1        | 1        | 0.043478 | 1        | 1        | 3.28E-12 | 0.030303 | 1        |
| 14 | 92258905  | 92258916  | TC2N                               | 6.42E-11 | 9.05E-15 | 0.16946  | 1        | 1        | 1        | 1        | 1        | 1        | 1        | 1        | 1        | 0.00037  | 0.016393 | 1        | 1        | 4.17E-09 | 1        | 0.067669 |
| 11 | 11969473  | 11969484  | USP47                              | 1.72E-08 | 9.36E-15 | 0.032258 | 1        | 1        | 1        | 1        | 0.040646 | 1        | 1        | 1        | 0.028469 | 1        | 1        | 1        | 1        | 3.28E-11 | 1        | 1        |
| 19 | 8839038   | 8839049   | ACTL9(dist=29858),OR231(dist=2267) | 0.000117 | 9.56E-15 | 1        | 1        | 1        | 1        | 1        | 1        | 1        | 1        | 1        | 1        | 1        | 1        | 1        | 1        | 0.166667 | 0.030769 | 1        |
| 6  | 150123316 | 150123316 |                                    | 1.28E-06 | 9.97E-15 | 0.127356 | 1        | 1        | 0.59214  | 0.257062 | 1        | 1        | 1        | 0.007064 | 0.373566 | 1        | 1        | 1        | 1        | 4.2E-06  | 1        | 1        |
| 7  | 43530099  | 43530103  | NCUR2D                             | 2.38E-08 | 8.66E-15 | 0.093317 | 1        | 1        | 1        | 1        | 1        | 1        | 1        | 0.014706 | 1        | 1        | 1        | 1        | 1        | 2.35E-09 | 1        | 0.079511 |
| 16 | 3065449   | 3065445   | PRR14                              | 5.03E-10 | 1.07E-14 | 1        | 1        | 0.018223 | 1        | 0.021622 | 1        | 1        | 1        | 1        | 0.001517 | 0.026316 | 1        | 1        | 1        | 0.222887 | 0.034483 | 1        |
| 11 | 36302410  | 36302422  | COMMD9                             | 2.69E-11 | 1.08E-14 | 0.103841 | 1        | 1        | 1        | 0.296926 | 0.183603 | 1        | 1        | 1        | 1        | 1        | 1        | 1        | 1        | 9.62E-09 | 1        | 0.001188 |
| 7  | 75513199  | 75513231  | RHBD02                             | 8.14E-10 | 1.14E-14 | 1        | 1        | 1        | 1        | 0.007143 | 1        | 1        | 1        | 1        | 1        | 1        | 1        | 1        | 1        | 6.12E-07 | 0.001174 | 0.041322 |
| 10 | 81925982  | 81925994  | ANKA11                             | 5.58E-12 | 1.18E-14 | 1        | 1        | 1        | 1        | 1        | 1        | 1        | 1        | 1        | 1        | 0.066667 | 0.176471 | 1.94E-05 | 0.071429 | 0.040006 | 1        |          |
| 2  | 70463168  | 70463180  | ITAI                               | 9.58E-12 | 1.25E-14 | 1        | 1        | 1        | 1        | 1        | 1        | 1        | 1        | 1        | 1        | 1        | 1        | 1        | 1        | 1.94E-08 | 0.028986 | 1        |
| 7  | 103234985 | 103234997 | RELN                               | 9.5E-08  | 1.28E-14 | 0.106607 | 0.022346 | 0.201424 | 0.097755 | 1        | 1        | 1        | 1        | 1        | 1        | 1        | 1        | 1        | 1        | 0.012743 | 0.04878  | 0.066398 |
| 15 | 90126218  | 90126232  |                                    | 4.29E-11 | 1.31E-14 | 0.030372 | 1        | 1        | 1        | 1        | 1        | 1        | 1        | 1        | 0.03225  | 1        | 1        | 1        | 1        | 5.9E-19  | 1        | 1        |
| 17 | 71223424  | 71223438  | FAM10A                             | 1.35E-11 | 1.4E-14  | 0.130303 | 0.050725 | 0.018919 | 1        | 1        | 1        | 1        | 1        | 1        | 0.032895 | 1        | 1        | 0.054054 | 1        | 2.41E-14 | 0.041096 | 0.20666  |
| 14 | 96788613  | 96788623  | ATG2B                              | 2.9E-05  | 1.53E-14 | 0.047619 | 1        | 1        | 1        | 1        | 0.033113 | 1        | 1        | 1        | 1        | 1        | 0.066667 | 1        | 1        | 4.54E-13 | 1        | 6.35E-05 |
| 2  | 55491007  | 55491018  | MTF2                               | 1.55E-10 | 1.59E-14 | 1        | 1        | 0.142634 | 1        | 1        | 1        | 1        | 1        | 1        | 0.034333 | 1        | 1        | 1        | 1        | 9.76E-12 | 1        | 0.265233 |
| 3  | 142274739 | 142274750 | ATRA                               | 6.46E-05 | 1.6E-14  | 1        | 1        | 0.033753 | 1        | 1        | 1        | 1        | 1        | 1        | 0.245161 | 1        | 1        | 1        | 1        | 4.23E-06 | 0.294412 | 0.077419 |
| 14 | 53217376  | 53217395  | STX                                | 2.14E-05 | 1.6E-14  | 1        | 1        | 1        | 0.052623 | 1        | 1        | 1        | 1        | 1        | 0.006263 | 1        | 1        | 1        | 1        | 0.042424 | 1        | 0.062718 |
| 13 | 73547700  | 73547726  | PIBF1                              | 0.000349 | 1.64E-14 | 0.06383  | 0.020151 | 1        | 1        | 1        | 1        | 1        | 1        | 1        | 0.112048 | 1        | 1        | 1        | 1        | 1.13E-14 | 1        | 0.08     |
| 18 | 31709810  | 31709828  | NOLA                               | 0.000086 | 1.69E-14 | 0.068966 | 1        | 1        | 0.075161 | 1        | 1        | 1        | 1        | 0.047619 | 1        | 1        | 1        | 1        | 1        | 1.79E-06 | 1        | 0.275926 |
| X  | 77264510  | 77264519  | MDM2A                              | 3.91E-11 | 1.7E-14  | 0.045455 | 0.023721 | 1        | 1        | 1        | 1        | 1        | 1        | 0.047619 | 1        | 1        | 1        | 1        | 1        | 0.227874 | 1        | 0.243789 |
| 3  | 184573472 | 184573483 | VPS8                               | 5.45E-07 | 1.84E-14 | 1        | 1        | 1        | 0.000766 | 1        | 1        | 1        | 1        | 1        | 0.02381  | 1        | 1        | 1        | 1        | 2.31E-07 | 1        | 0.032049 |
| 3  | 146234962 | 146234973 | PLSCR1                             | 1.6E-07  | 1.86E-14 | 0.00266  | 1        | 1        | 1        | 1        | 1        | 1        | 1        | 1        | 0.022727 | 1        | 1        | 1        | 1        | 1.33E-05 | 0.005665 | 0.141403 |
| 15 | 37328977  | 37328996  | IMB52                              | 2.85E-06 | 1.9E-14  | 1        | 1        | 0.108108 | 1        | 1        | 1        | 1        | 1        | 1        | 1        | 1        | 1        | 1        | 1        | 1.52E-07 | 1        | 1        |
| 9  | 85987879  | 85987892  | FRMD3                              | 4.6E-05  | 1.97E-14 | 0.018939 | 1        | 1        | 0.006035 | 1        | 1        | 1        | 1        | 0.368277 | 1        | 1        | 1        | 1        | 1        | 3.35E-06 | 1        | 0.005285 |
| 2  | 183995073 | 183995135 | NUPR3                              | 2.21E-11 | 1.98E-14 | 0.007974 | 0.172663 | 0.057681 | 0.038663 | 1        | 0.051439 | 1        | 1        | 1        | 1        | 1        | 1        | 1        | 1        | 1.98E-16 | 1        | 0.266678 |
| 16 | 84124604  | 84124621  | VMPF5                              | 1.85E-08 | 2.01E-14 | 0.136437 | 0.386118 | 1        | 0.018126 | 1        | 1        | 1        | 1        | 1        | 0.333333 | 1        | 1        | 1        | 1        | 2.1E-12  | 1        | 0.009163 |
| 17 | 9223084   | 9223093   | NCUR2D                             | 1.35E-11 | 1.4E-14  | 0.130303 | 0.050725 | 0.018919 | 1        | 1        | 0.115538 | 1        | 1        | 1        | 0.000846 | 1        | 1        | 1        | 1        | 1.31E-05 | 1        | 0.243789 |
| 6  | 65361369  | 65361402  | MAG1                               | 0.000476 | 2.12E-14 | 0.00101  | 0.279557 | 1        | 1        | 1        | 1        | 1        | 1        | 0.019231 | 1        | 0.357143 | 1.73E-13 | 0.093270 | 0.000399 | 1        | 1        |          |
| 1  | 22035521  | 22035533  | RAB3GAP2                           | 1.68E-09 | 2.13E-14 | 0.001083 | 0.086957 | 0.022059 | 1        | 0.00495  | 1        | 1        | 1        | 1        | 1.16E-06 | 1        | 1        | 1        | 1        | 3.84E-11 | 1        | 0.160926 |
| 3  | 105238890 | 105238907 | ALCAM                              | 7.68E-06 | 2.14E-14 | 1        | 1        | 0.281689 | 1        | 1        | 1        | 1        | 1        | 1        | 0.022727 | 0.166667 | 1.1E-09  | 0.056338 | 0.479897 | 1        | 1        |          |
| 21 | 37619920  | 37619943  | DOPYE2                             | 2.09E-08 | 2.18E-14 | 1        | 1        | 1        | 0.10815  | 1        | 1        | 1        | 1        | 0.028571 | 0.228317 | 1        | 1        | 1        | 1        | 4.42E-11 | 0.077922 | 1.11E-06 |
| 5  | 138758546 | 138758559 | DNAC18                             | 0.000257 | 2.44E-14 | 0.086207 | 1        | 1        | 1        | 1        | 1        | 1        | 1        | 1        | 1        | 1        | 1        | 1        | 1        | 3.01E-06 | 1        | 0.108826 |
| 11 | 122817187 | 122817199 | C11orf63                           | 5.82E-09 | 2.47E-14 | 1        | 0.00905  | 1        | 0.026738 | 1        | 0.008658 | 1        | 1        | 1        | 0.041667 | 1        | 1        | 1        | 1        | 1.4E-13  | 0.034478 | 1        |
| 3  | 154807458 | 154807461 | CLRN1                              | 1.84E-06 | 2.49E-14 | 0.023721 | 0.008083 | 0.122807 | 1        | 1        | 1        | 1        | 1        | 1        | 0.129487 | 1        | 1        | 0.038463 | 1        | 2.21E-10 | 0.000151 | 1        |
| 3  | 33912102  | 33912114  | UBE2R2                             | 9.2E-09  | 2.5E-14  | 0.070175 | 1        | 1        | 0.135399 | 0.123991 | 0.096547 | 1        | 1        | 1        | 0.040323 | 0.00138  | 0.048878 | 0.111111 | 1.29E-13 | 0.031746 | 0.060264 |          |
| 17 | 9501525   | 9501545   | CFAP2                              | 1.05E-08 | 2.5E-14  | 0.042146 | 1        | 1        | 0.00242  | 1        | 1        | 1        | 1        | 1        | 0.045977 | 1        | 1        | 1        | 1        | 1.71E-06 | 1        | 0.286489 |
| 3  | 101370529 | 101370548 | ZBTB11                             | 1.46E-10 | 2.55E-14 | 0.009231 | 0.033331 | 1        | 0.023669 | 1        | 0.032651 | 1        | 1        | 1        | 0.333333 | 1        | 1        | 1        | 1        | 1.08E-09 | 1        | 0.113191 |
| X  | 3828847   | 3828870   | CREBBP                             | 1.29E-06 | 2.57E-14 | 0.016081 | 0.016807 | 1        | 1        | 0.043488 | 1        | 1        | 1        | 1        | 0.078947 | 0.019231 | 1        | 1        | 1        | 7.44E-07 | 1        | 0.006079 |
| 3  | 31200799  | 31200843  | DMD                                | 3.08E-09 | 2.58E-14 | 0.020151 | 0.679709 | 0.143384 | 0.00986  | 1        | 0.05084  | 0.166299 | 1        | 1        | 1        | 0.97512  | 0.078985 | 1        | 1        | 6.31E-06 | 1        | 0.016306 |
| 11 | 75737770  | 75737785  | PII5                               | 7.24E-07 | 2.6E-14  | 0.004329 | 1        | 1        | 1        | 1        | 1        | 1        | 1        | 1        | 0.027778 | 0.076923 | 0.001404 | 0.130279 | 0.279549 | 1        | 1        |          |
| 8  | 4638608   | 4638622   | CLRN1                              | 3.3E-09  | 2.79E-14 | 0.005199 | 1        | 1        | 1        | 1        | 1        | 1        | 1        | 0.15038  | 0.063063 | 1        | 1        | 1        | 1        | 2.86E-10 | 1        | 0.003918 |
| 10 | 17164777  | 17164781  | CLRN1                              | 6.37E-07 | 2.8E-14  | 0.000752 | 1        | 0.135399 | 0.123991 | 0.096547 | 1        | 1        | 1        | 0.022929 | 0.00138  | 0.048878 | 0.111111 | 1.29E-13 | 0.031746 | 0.060264 | 0.01465  |          |
| 3  | 192516152 | 192516163 | MB21D2                             | 0.000871 | 2.9E-14  | 1        | 1        | 1        | 0.133333 | 1        | 1        | 1        | 1        | 1        | 0.034843 | 1        | 1        | 1        | 1        | 0.000136 | 1        | 1        |
| 14 | 90735723  | 90735735  | PSMC1                              | 1.51E-10 | 3.08E-14 | 0.183508 | 1        | 1        | 1        | 1        | 1        | 1        | 1        | 1        | 0.068182 | 1        | 1.86E-13 | 0.000219 | 0.057244 | 1        | 1        |          |
| 5  | 180668426 | 180668444 | GNB2L1                             | 1.41E-09 | 3.23E-14 | 0.117647 | 0.001594 | 1        | 0.016287 | 1        | 0.018868 | 1        | 1        | 1        | 1        | 0.001394 | 1        | 1        | 1        | 0.001394 | 1        | 0.016419 |
| 1  | 24857651  | 24857670  | RCAN3                              | 1.45E-07 | 3.3E-14  | 1        | 0.004219 | 1        | 0.043062 | 1        | 1        | 1        | 1        | 1        | 1        | 1        | 1        | 1        | 1        | 7.31E-05 | 1        | 0.002375 |
| 18 | 12817106  | 12817118  | PIRN2                              | 8.12E-09 | 3.35E-14 | 1        | 0.212698 | 1        | 1        | 1        | 0.014085 | 0.195578 | 0.285714 | 1        | 1.23E-06 | 0.052973 | 0.21864  | 1        | 1        | 0.000151 | 1        | 0.286489 |
| 11 | 53516162  | 53516173  | DNAAF1                             | 1.17E-06 | 3.47E-14 | 1        | 1        | 1        | 1        | 1        | 1        | 1        | 1        | 1        | 0.027397 | 1        | 8.63E-06 | 0.064501 | 0.000151 | 1        | 1        |          |
| 14 | 39620880  | 39620898  | TRAPP6B                            | 9.88E-08 | 3.57E-14 | 0.041667 | 1        | 1        | 0.018868 | 0.021739 | 1        | 1        | 1        | 1        | 0.034843 | 1        | 1        | 1        | 1        | 1.08E-07 | 1        | 0.004847 |
| 5  | 145888687 | 145888714 | TCERG1                             | 1.71E-11 | 3.8E-14  | 0.000218 | 1        | 1        | 1        | 1        | 1        | 1        | 1        | 1        | 0.00283  | 0.02381  | 1        | 1        | 1        | 1.25E-10 | 0.033898 | 0.00016  |
| 7  | 92883250  | 92883261  | CDC132                             | 2.82E-10 | 3.82E-14 | 1        | 1        | 1        | 1        | 0.008696 | 1        | 1        | 1        | 1        | 1        | 1        | 1        | 1        | 1        | 7.27E-15 | 1        | 0.000524 |
| 14 | 88454869  | 88454880  | GALC                               | 0.000355 | 3.9E-14  | 1        | 0.058824 | 0.023438 | 1        | 1        | 1        | 0.075472 | 1        | 1        | 1        | 1        | 1        | 1        | 1        | 4.38E-06 | 1        | 3.71E-06 |
| 19 | 47656338  | 47656359  | SAE1                               | 3.12E-05 | 4.06E-14 | 0.002463 | 1        | 0.014184 | 1        | 0.       |          |          |          |          |          |          |          |          |          |          |          |          |



|    |           |           |                                      |           |          |          |          |          |          |          |   |          |          |          |          |          |          |           |
|----|-----------|-----------|--------------------------------------|-----------|----------|----------|----------|----------|----------|----------|---|----------|----------|----------|----------|----------|----------|-----------|
| 1  | 151134579 | 151134590 | LYSMD1,NFPA1821-SCNML                | 0.000271  | 1.1E-09  | 0.001057 | 1        | 0.052632 | 1        | 1        | 1 | 0.047059 | 1        | 0.041667 | 0.090909 | 6.19E-10 | 1        | 0.131327  |
| 11 | 67787366  | 67787383  | ALDH3B1                              | 0.4       | 0.193277 | 1        | 1        | 0.029126 | 1        | 1        | 1 | 1        | 1        | 1        | 1        | 1        | 1        | 0.003173  |
| 13 | 113442784 | 113442795 | NAASO                                | 1.1E-05   | 2.18E-10 | 4E-06    | 0.01     | 1        | 1        | 1        | 1 | 1        | 1        | 1        | 1        | 1        | 1        | 0.342E-08 |
| 7  | 203675383 | 203675493 | CCAI                                 | 0.355E-09 | 9.47E-08 | 6.74E-06 | 1        | 1        | 1        | 1        | 1 | 0.01047  | 1        | 0.017241 | 1        | 1        | 1        | 0.024395  |
| 4  | 120423686 | 120423697 | PDE5A                                | 7.16E-06  | 1.24E-10 | 1.03E-05 | 0.012658 | 1        | 1        | 1        | 1 | 1        | 0.007541 | 1        | 1        | 1        | 1        | 2.32E-09  |
| 1  | 93687513  | 93687543  | CCDC18                               | 0.000558  | 0.014166 | 1.3E-05  | 1        | 1        | 1        | 1        | 1 | 1        | 1        | 1        | 1        | 1        | 1        | 1.14E-18  |
| 12 | 121618278 | 121618293 | P2RX7                                | 3.02E-09  | 0.000196 | 1.84E-05 | 1        | 1        | 1        | 1        | 1 | 1        | 0.032258 | 1        | 1        | 1        | 1        | 2.77E-14  |
| 21 | 37706087  | 37706100  | MORC3                                | 4.37E-09  | 3.54E-09 | 2.52E-05 | 1        | 1        | 1        | 1        | 1 | 1        | 0.001639 | 1        | 1        | 1        | 1        | 2.67E-12  |
| 14 | 20344373  | 20344394  | ORAK2                                | 6.05E-07  | 6.44E-11 | 2.82E-05 | 1        | 0.502572 | 1        | 1        | 1 | 1        | 1        | 1        | 1        | 1        | 1        | 1.22E-20  |
| 11 | 110306734 | 110306760 | FDX1                                 | 0.000149  | 9.4E-09  | 3.3E-05  | 0.005814 | 0.133157 | 1        | 1        | 1 | 1        | 1        | 1        | 1        | 1        | 1        | 9.41E-06  |
| 13 | 12509740  | 12509749  | DNF709                               | 0.000328  | 3.17E-09 | 6.8E-05  | 1        | 0.179182 | 1        | 1        | 1 | 1        | 0.263991 | 1        | 1        | 1        | 0.045455 | 1.43E-08  |
| 12 | 78594396  | 78594427  | NAV3                                 | 4.1E-05   | 0.000814 | 4.14E-05 | 1        | 1        | 1        | 1        | 1 | 1        | 0.019802 | 1        | 1        | 1        | 0.033898 | 1.89E-05  |
| 20 | 57569566  | 57569636  | NELFCD                               | 3.55E-09  | 6.04E-10 | 4.87E-05 | 1        | 0.047244 | 1        | 1        | 1 | 1        | 1        | 1        | 1        | 1        | 1        | 1.68E-17  |
| 14 | 36969255  | 36969278  | RALGAP1P                             | 2.6E-05   | 9.05E-09 | 6.17E-05 | 1        | 1        | 1        | 1        | 1 | 1        | 1        | 1        | 1        | 1        | 1        | 3.6E-25   |
| 4  | 95508108  | 95508128  | PDUJMS                               | 1.97E-09  | 0.005477 | 6.17E-05 | 1        | 1        | 1        | 1        | 1 | 1        | 1        | 1        | 1        | 1        | 1        | 1.14E-25  |
| 2  | 141625834 | 141625854 | LRRP1B                               | 4.63E-12  | 3.38E-07 | 8.35E-05 | 0.038998 | 0.239996 | 1        | 1        | 1 | 1        | 0.016129 | 1        | 1        | 1        | 1        | 1.92E-16  |
| 1  | 169819526 | 169819538 | C1orf112                             | 1.95E-10  | 2.96E-05 | 9.16E-05 | 1        | 1        | 1        | 1        | 1 | 1        | 0.007692 | 1        | 1        | 1        | 1        | 8.4E-06   |
| 3  | 136677957 | 136677968 | DARS                                 | 1.18E-07  | 9.66E-09 | 3.6E-05  | 1        | 1        | 1        | 1        | 1 | 0.025396 | 1        | 1        | 1        | 1        | 1        | 0.000299  |
| 12 | 66523628  | 66523660  | ILPH                                 | 0.001516  | 0.000495 | 0.000137 | 1        | 0.115373 | 1        | 1        | 1 | 1        | 1        | 1        | 1        | 1        | 1        | 0.024966  |
| 8  | 75157416  | 75157442  | IPH1                                 | 6.32E-05  | 0.056416 | 0.000137 | 1        | 1        | 1        | 1        | 1 | 1        | 0.001553 | 1        | 1        | 1        | 1        | 0.00021   |
| 12 | 124281419 | 124281436 | DNAH10                               | 3.03E-08  | 5.25E-13 | 0.000138 | 1        | 1        | 0.092859 | 1        | 1 | 1        | 0.032258 | 1        | 1        | 1        | 1        | 4.33E-06  |
| 12 | 96694172  | 96694190  | CNDX17                               | 9.56E-06  | 6.45E-06 | 0.000142 | 1        | 1        | 1        | 0.093702 | 1 | 1        | 1        | 1        | 1        | 1        | 1        | 2.77E-07  |
| 16 | 53913911  | 53913925  | F1O                                  | 1.87E-09  | 2.85E-11 | 0.000161 | 1        | 0.06338  | 1        | 1        | 1 | 1        | 1        | 0.333333 | 1        | 1        | 1        | 2E-09     |
| 5  | 134011834 | 134011848 | SECC2A                               | 2.54E-07  | 0.000141 | 0.000182 | 1        | 1        | 1        | 0.035292 | 1 | 1        | 0.188868 | 1        | 1        | 1        | 1        | 5.21E-05  |
| 5  | 7808348   | 78083871  | IMY                                  | 4.42E-08  | 0.010372 | 0.000192 | 1        | 1        | 1        | 1        | 1 | 1        | 1        | 1        | 1        | 1        | 1        | 1.8E-15   |
| 13 | 94591851  | 94591863  | CCDC18                               | 2.55E-07  | 2.41E-10 | 0.0002   | 1        | 1        | 1        | 1        | 1 | 1        | 0.028166 | 1        | 1        | 1        | 1        | 3.3E-12   |
| 9  | 79835312  | 79835353  | VPS13A                               | 4.79E-11  | 2.8E-08  | 0.0002   | 1        | 1        | 1        | 1        | 1 | 1        | 0.016529 | 1        | 1        | 1        | 1        | 1.93E-10  |
| 17 | 21603750  | 21603765  | DNAH11                               | 1.04E-11  | 1.07E-11 | 0.000209 | 0.032609 | 1        | 1        | 1        | 1 | 1        | 0.021739 | 1        | 1        | 1        | 1        | 8.64E-16  |
| 14 | 96794877  | 96794890  | ATG2B                                | 6.51E-08  | 6.71E-11 | 0.000217 | 1        | 0.181818 | 0.017699 | 0.027272 | 1 | 1        | 0.053571 | 1        | 0.111111 | 1.28E-08 | 0.077778 | 1         |
| 17 | 30267579  | 30267601  | SUZ12                                | 4.91E-05  | 0.002789 | 0.000217 | 1        | 0.082447 | 1        | 1        | 1 | 1        | 1        | 1        | 1        | 1        | 1        | 2.87E-09  |
| 2  | 60988862  | 60988872  | PAPOLG                               | 9.2E-05   | 7.21E-09 | 0.000231 | 0.000129 | 1        | 1        | 0.086915 | 1 | 1        | 0.040541 | 1        | 1        | 1        | 1        | 2.98E-10  |
| 12 | 43964612  | 43964623  | PAMT50(dist=18888),PUS7(dist=157787) | 2.04E-05  | 2.33E-07 | 0.000264 | 1        | 1        | 1        | 1        | 1 | 0.124228 | 1        | 1        | 0.003497 | 0.004933 | 0.001753 | 0.059935  |
| 13 | 73584828  | 73584841  | PAN                                  | 9.74E-05  | 0.110732 | 0.000264 | 1        | 1        | 1        | 1        | 1 | 1        | 1        | 1        | 1        | 1        | 1        | 0.024996  |
| 8  | 48732074  | 48732096  | PKRDC                                | 5E-08     | 4.24E-09 | 0.000264 | 1        | 1        | 1        | 1        | 1 | 1        | 0.007143 | 1        | 1        | 1        | 1        | 6.33E-18  |
| 1  | 207237233 | 207237262 | PKFB2                                | 2.12E-06  | 1.54E-07 | 0.000282 | 1        | 0.113384 | 1        | 1        | 1 | 1        | 1        | 1        | 1        | 1        | 1        | 5.11E-09  |
| 12 | 112119387 | 112119420 | BRAP                                 | 1.98E-09  | 8.83E-08 | 0.000284 | 1        | 1        | 1        | 1        | 1 | 1        | 1        | 1        | 0.206897 | 5.87E-19 | 1        | 0.177885  |
| 1  | 245025697 | 245025717 | HNRNPJ                               | 1.07E-11  | 2.31E-13 | 0.000292 | 1        | 0.133746 | 1        | 1        | 1 | 1        | 0.000301 | 0.019608 | 3.21E-20 | 0.005553 | 1        | 0.158469  |
| 16 | 23457290  | 23457308  | COG7                                 | 3.33E-10  | 3.05E-07 | 0.000302 | 1        | 0.208516 | 1        | 1        | 1 | 1        | 1        | 1        | 1        | 1        | 1        | 3.47E-17  |
| 10 | 88458996  | 88459025  | LD33                                 | 0.000654  | 8.14E-11 | 0.000305 | 0.044554 | 0.000792 | 0.174889 | 1        | 1 | 0.311996 | 1        | 1        | 0.028571 | 0.009628 | 1        | 0.031717  |
| 1  | 73078941  | 73078958  | PWW                                  | 2.73E-09  | 1.65E-07 | 0.000324 | 1        | 0.030612 | 0.007747 | 1        | 1 | 1        | 0.096721 | 0.019608 | 0.004146 | 1        | 1        | 0.006618  |
| 6  | 36569317  | 36569377  | SRSF3                                | 3.61E-07  | 7.85E-07 | 0.000325 | 1        | 0.066231 | 1        | 1        | 1 | 1        | 1        | 1        | 1        | 1        | 1        | 1.9E-21   |
| 5  | 61745737  | 61745750  | POI1                                 | 2.66E-07  | 1.47E-05 | 0.000348 | 1        | 0.012338 | 0.365751 | 1        | 1 | 1        | 0.084619 | 0.087004 | 1        | 1        | 1        | 2.97E-06  |
| 5  | 65372793  | 65372805  | ERBBP2                               | 3.43E-10  | 1.05E-10 | 0.000392 | 1        | 1        | 1        | 1        | 1 | 1        | 1        | 0.083333 | 1.39E-13 | 0.049074 | 0.023187 |           |
| 12 | 94575162  | 94575177  | PLXNC1                               | 1.8E-10   | 7.98E-11 | 0.000399 | 1        | 1        | 1        | 0.020548 | 1 | 1        | 0.129487 | 0.04878  | 1        | 1        | 1        | 4.25E-14  |
| 4  | 119674051 | 119674062 | SEC2AD                               | 1.99E-05  | 2.65E-10 | 0.000403 | 1        | 0.218647 | 1        | 1        | 1 | 1        | 0.003759 | 0.008772 | 4.63E-10 | 1        | 1        | 0.084149  |
| 5  | 162884074 | 162884113 | NUDCD2                               | 8.35E-08  | 5.56E-13 | 0.000414 | 1        | 1        | 0.020202 | 1        | 1 | 1        | 1        | 1        | 1        | 1        | 1        | 6.57E-10  |
| 6  | 75890923  | 75890929  | PCAD                                 | 3.82E-10  | 4.28E-07 | 0.000429 | 1        | 0.348869 | 1        | 1        | 1 | 1        | 0.028646 | 1        | 0.078947 | 1.27E-09 | 1        | 0.005831  |
| 3  | 10103903  | 10103946  | FANCID2                              | 1.59E-06  | 0.000115 | 5.00E-04 | 1        | 1        | 1        | 1        | 1 | 0.017241 | 1        | 1        | 0.3125   | 1.72E-09 | 1        | 0.007718  |
| 7  | 77584159  | 77584171  | PHTF2                                | 9.33E-12  | 1.05E-08 | 0.000448 | 1        | 0.049505 | 1        | 1        | 1 | 1        | 0.157325 | 1        | 0.333333 | 5.29E-11 | 0.025974 | 0.0329    |
| 10 | 17204246  | 17204272  | TRDMT1                               | 2.68E-05  | 9.69E-08 | 0.000495 | 1        | 0.444979 | 1        | 1        | 1 | 1        | 0.179929 | 0.038462 | 1        | 1        | 1        | 7.98E-07  |
| 17 | 1265304   | 1265326   | VYHAE                                | 2.13E-11  | 1.83E-09 | 0.00051  | 1        | 0.136821 | 1        | 1        | 1 | 1        | 0.019608 | 1        | 0.015385 | 1        | 1        | 1.68E-25  |
| 1  | 215824195 | 215824226 | USHA2A                               | 1.47E-11  | 2.22E-08 | 0.00056  | 1        | 0.079571 | 0.021739 | 1        | 1 | 1        | 1        | 1        | 1        | 1        | 1        | 4.47E-13  |
| 2  | 169994021 | 169994058 | LRP2                                 | 3.97E-10  | 7.87E-12 | 0.000605 | 1        | 0.133177 | 1        | 0.301511 | 1 | 1        | 0.016393 | 1        | 0.018182 | 1        | 1        | 2.34E-16  |
| 6  | 73078941  | 73078958  | PHF27                                | 1.32E-05  | 0.005234 | 0.000605 | 1        | 0.260204 | 1        | 1        | 1 | 1        | 0.3125   | 1        | 0.078947 | 1.27E-09 | 1        | 0.005831  |
| 3  | 13511863  | 13511890  | PHF6                                 | 0.000107  | 5.80E-09 | 0.000627 | 0.025    | 0.021581 | 1        | 0.017241 | 1 | 1        | 1        | 1        | 0.004    | 1        | 1        | 6.8E-11   |
| 6  | 42626564  | 42626585  | UBR2                                 | 1.63E-06  | 1.07E-09 | 0.000656 | 1        | 1        | 1        | 1        | 1 | 1        | 1        | 1        | 1        | 1        | 1        | 2.6E-22   |
| 1  | 173797451 | 173797462 | DARS2                                | 1.04E-09  | 5.21E-10 | 0.000659 | 1        | 0.068027 | 0.004173 | 0.018868 | 1 | 1        | 0.046875 | 0.115602 | 0.003484 | 1        | 1        | 2.63E-14  |
| 13 | 29238622  | 29238633  | POMP                                 | 4.66E-12  | 7.77E-10 | 0.000754 | 1        | 1        | 1        | 1        | 1 | 1        | 0.0375   | 0.035088 | 1        | 1        | 1        | 6.34E-12  |
| 14 | 149543201 | 149543232 | ZNF862                               | 6.51E-06  | 7.3E-07  | 0.000754 | 1        | 1        | 1        | 1        | 1 | 1        | 0.012987 | 1        | 1        | 1        | 1        | 5.13E-10  |
| 6  | 111685185 | 111685193 | REVL                                 | 8.92E-08  | 2.09E-08 | 0.000784 | 1        | 1        | 0.000884 | 1        | 1 | 1        | 1        | 1        | 1        | 1        | 1        | 5.7E-06   |
| 15 | 15702117  | 15702141  | KILCAD30                             | 0.066409  | 4.72E-09 | 0.000798 | 1        | 1        | 1        | 1        | 1 | 1        | 1        | 1        | 1        | 1        | 1        | 3.84E-11  |
| 13 | 132178958 | 13217919  | NIN                                  | 0.000178  | 4.47E-10 | 0.000845 | 1        | 1        | 1        | 0.010753 | 1 | 1        | 1        | 1        | 1        | 1        | 1        | 0.000945  |
| 18 | 21046255  | 21046274  | RICK3                                | 1.86E-11  | 1.02E-07 | 0.000866 | 0.019868 | 1        | 0.073275 | 1        | 1 | 1        | 1        | 0.04     | 1        | 1        | 1        | 4.6E-13   |
| 2  | 219350358 | 219350383 | USP37                                | 3.13E-06  | 9.45E-06 | 0.000892 | 1        | 0.050886 | 1        | 1        | 1 | 1        | 0.042662 | 1        | 0.431034 | 2.67E-14 | 0.073708 | 0.002181  |
| 12 | 30887772  | 30887783  | CAPRIN2                              | 4.68E-06  | 0.183186 | 0.00101  | 1        | 1        | 1        | 1        | 1 | 1        | 0.002452 | 1        | 0.117647 | 0.000104 | 1        | 1         |
| 9  | 115060090 | 115060107 | MIR3134                              | 1.03E-06  | 4.04E-12 | 0.001012 | 1        | 0.590106 | 0.226235 | 1        | 1 | 1        | 0.039022 | 0.156414 | 1        | 1        | 1        | 1.26E-06  |
| 13 | 42772765  | 42772789  | DGKH                                 | 1.04E-09  | 2.44E-06 | 0.001025 | 1        | 0.029333 | 1        | 0.020305 | 1 | 1        | 1        | 0.066102 | 1        | 1        | 1        | 7.29E-13  |
| 11 | 35287000  | 35287014  | SIC1A2                               | 1.35E-10  | 3.39E-13 | 0.001031 | 1        | 0.354866 | 1        | 1        | 1 | 1        | 0.016488 | 0.090909 | 0.032967 | 1.2E-10  | 1        | 0.19318   |
| 1  | 24078106  | 24078115  | SRMB                                 | 1.27E-05  | 2.66E-07 | 0.001037 | 1        | 1        | 1        | 1        | 1 | 1        | 0.041418 | 1        |          |          |          |           |

|    |           |           |                   |          |          |          |          |          |          |          |          |          |          |          |          |          |          |          |          |
|----|-----------|-----------|-------------------|----------|----------|----------|----------|----------|----------|----------|----------|----------|----------|----------|----------|----------|----------|----------|----------|
| 13 | 25467010  | 25467036  | CENPJ             | 2.01E-10 | 6.97E-12 | 0.003072 | 1        | 1        | 1        | 0.045839 | 1        | 1        | 1        | 0.139786 | 1        | 0.294118 | 1.48E-08 | 1        | 0.00013  |
| 5  | 58271705  | 58271734  | PD6AD             | 6.99E-06 | 0.000286 | 0.003072 | 1        | 1        | 0.234193 | 1        | 1        | 1        | 0.013999 | 0.08     | 1        | 1        | 5.85E-06 | 1        | 0.002806 |
| 5  | 76785406  | 76785444  | WDRM1             | 9.09E-10 | 8.86E-12 | 0.003072 | 1        | 1        | 1        | 1        | 1        | 1        | 1        | 1        | 1        | 1        | 4.84E-23 | 0.028169 | 0.087067 |
| 13 | 10391601  | 10391633  | TPD2              | 1.28E-11 | 1.28E-10 | 0.003072 | 0.004831 | 1        | 1        | 1        | 1        | 1        | 1        | 1        | 1        | 1        | 8.03E-14 | 1        | 0.002973 |
| 14 | 72941317  | 72941328  | RG56              | 7.52E-05 | 8.94E-12 | 0.003171 | 1        | 1        | 0.055545 | 1        | 1        | 1        | 1        | 0.016667 | 1        | 1        | 6.49E-14 | 1        | 0.000147 |
| 2  | 209197957 | 209197992 | PIKPVVE           | 9.17E-08 | 0.2      | 0.003171 | 1        | 1        | 1        | 1        | 1        | 1        | 1        | 1        | 1        | 0.123871 | 0.036585 | 0.011897 |          |
| 5  | 16763725  | 16763737  | MYO10             | 3.92E-08 | 3.06E-12 | 0.003171 | 1        | 1        | 1        | 1        | 1        | 1        | 0.029851 | 0.067797 | 1        | 1        | 6.39E-15 | 0.049383 | 0.196535 |
| 20 | 20003130  | 20003151  | NAAZ0             | 4.52E-09 | 1.18E-07 | 0.003279 | 1        | 1        | 1        | 1        | 1        | 1        | 1        | 1        | 1        | 1        | 0.28673  | 1        | 1.87E-07 |
| 5  | 71500888  | 71500899  | MAP1B             | 2.43E-10 | 2.8E-11  | 0.003232 | 1        | 1        | 1        | 1        | 1        | 1        | 1        | 0.016667 | 1        | 1        | 5.87E-05 | 1        | 1        |
| 6  | 149899943 | 149899954 | GNM1              | 1.45E-08 | 0.002187 | 0.003232 | 1        | 1        | 1        | 1        | 0.010753 | 1        | 1        | 0.014286 | 1        | 1        | 0.000779 | 1        | 0.000891 |
| 4  | 23262235  | 23262245  | PARPC1A           | 4.28E-09 | 0.002076 | 0.003238 | 0.11894  | 0.270556 | 1        | 1        | 1        | 1        | 0.048774 | 1        | 1        | 1        | 6.39E-15 | 1        | 0.02973  |
| 10 | 35818799  | 35818815  | CCNY              | 1.51E-11 | 6.61E-11 | 0.003454 | 1        | 1        | 1        | 0.091406 | 1        | 1        | 1        | 1        | 0.130435 | 2.43E-11 | 1        | 0.071326 |          |
| 4  | 75147041  | 75147074  | MTHFD2L           | 9.07E-07 | 1.69E-06 | 0.003454 | 1        | 1        | 0.193824 | 1        | 1        | 1        | 1        | 1        | 1        | 1        | 3.41E-10 | 1        | 0.053371 |
| 1  | 185953264 | 185953293 | HMCN1             | 0.000386 | 2.71E-07 | 0.003484 | 0.014599 | 1        | 0.023077 | 0.024169 | 1        | 0.068947 | 1        | 1        | 1        | 1        | 4.96E-08 | 1        | 1        |
| 4  | 103553441 | 103553459 | MANBA             | 1.23E-08 | 2.51E-08 | 0.003484 | 1        | 0.27535  | 0.106689 | 1        | 1        | 1        | 1        | 1        | 0.2      | 0.000379 | 1        | 0.015118 |          |
| 7  | 92855628  | 92855641  | HEPACAM2          | 1.25E-09 | 0.000672 | 0.003484 | 1        | 0.176032 | 1        | 0.106288 | 1        | 0.015267 | 0.107819 | 0.04     | 0.142857 | 2.63E-06 | 0.000126 | 0.015831 |          |
| 1  | 93584864  | 93584885  | MTF2              | 2.7E-08  | 0.000308 | 0.003488 | 1        | 1        | 1        | 1        | 1        | 1        | 1        | 0.029851 | 0.230769 | 3.3E-11  | 1        | 8.63E-05 |          |
| 16 | 4657206   | 4657316   | FTLAD             | 0.000409 | 4.87E-08 | 0.003507 | 1        | 1        | 1        | 1        | 1        | 1        | 1        | 1        | 1        | 1        | 3.78E-07 | 1        | 0.171373 |
| 1  | 10950199  | 10950216  | TRP8P             | 1.51E-11 | 3.39E-07 | 0.003509 | 1        | 1        | 1        | 1        | 1        | 1        | 1        | 1        | 1        | 1        | 2.46E-14 | 0.030303 | 2.39E-05 |
| 7  | 77006092  | 77006113  | GSAP              | 1.83E-05 | 5.15E-07 | 0.003583 | 1        | 0.046512 | 1        | 1        | 1        | 1        | 1        | 1        | 1        | 1        | 2.38E-16 | 1        | 1        |
| 4  | 15642515  | 15642535  | FBX15             | 6.91E-05 | 6.36E-06 | 0.003659 | 1        | 1        | 0.008734 | 1        | 0.068066 | 1        | 1        | 1        | 1        | 1        | 4.64E-09 | 1        | 1        |
| 5  | 142662342 | 142662359 | NR3C1             | 1.93E-10 | 5.1E-05  | 0.003661 | 1        | 1        | 1        | 1        | 1        | 1        | 1        | 1        | 1        | 1        | 2.68E-05 | 0.038462 | 0.009949 |
| 1  | 11886214  | 11886137  | CLCN6             | 5.07E-08 | 3.81E-09 | 0.00369  | 1        | 0.090862 | 1        | 1        | 1        | 1        | 1        | 1        | 1        | 1        | 5.9E-09  | 0.038462 | 0.003191 |
| 2  | 196578306 | 196578326 | SLC39A10          | 2.41E-08 | 4.41E-06 | 0.00369  | 1        | 1        | 1        | 1        | 1        | 1        | 0.019355 | 1        | 1        | 1        | 2.08E-14 | 0.03125  | 0.11161  |
| 15 | 43739886  | 43739739  | NR1B-2P           | 2.3E-09  | 4.2E-08  | 0.003702 | 1        | 1        | 1        | 1        | 0.018868 | 1        | 1        | 1        | 1        | 1        | 5.37E-12 | 1        | 0.004269 |
| 44 | 44789561  | 44789538  | CPD2              | 1.05E-05 | 2.24E-08 | 0.003702 | 1        | 1        | 1        | 1        | 1        | 0.01241  | 0.018159 | 1        | 1        | 1        | 3.93E-15 | 1        | 0.372166 |
| 20 | 31981959  | 31981984  | CDSCRAP1          | 0.017545 | 0.001934 | 0.003702 | 1        | 1        | 1        | 1        | 1        | 1        | 0.027874 | 0.026786 | 1        | 1        | 1.51E-06 | 1        | 1        |
| 12 | 62785259  | 62785270  | USP15             | 4.21E-12 | 2.88E-07 | 0.003846 | 1        | 1        | 1        | 1        | 0.014085 | 0.001012 | 1        | 1        | 1        | 1        | 4.66E-09 | 1        | 0.023358 |
| 11 | 134054705 | 134054746 | NCAPD3            | 2.41E-11 | 3.23E-07 | 0.00404  | 0.483073 | 0.280635 | 1        | 1        | 0.000716 | 1        | 0.07326  | 0.038314 | 0.272727 | 0.328672 | 1        | 0.002292 |          |
| 2  | 54163830  | 54163905  | PSM2A             | 0.000225 | 4.44E-07 | 0.00404  | 1        | 0.07619  | 0.002754 | 1        | 1        | 0.096774 | 1        | 1        | 1        | 1        | 0.001287 | 1        | 0.002661 |
| 1  | 33135035  | 33135055  | RHB4              | 1.3E-07  | 8.51E-12 | 0.004049 | 1        | 0.009346 | 1        | 1        | 1        | 1        | 1        | 1        | 1        | 1        | 1.02E-05 | 0.03125  | 0.105187 |
| 29 | 21968716  | 21968720  | UBE2L3            | 1.44E-10 | 8.89E-09 | 0.004049 | 0.015    | 1        | 0.028994 | 0.031216 | 1        | 1        | 1        | 1        | 1        | 1        | 1.98E-08 | 1        | 0.0048   |
| 8  | 87215841  | 87215835  | NR3C3             | 1.44E-10 | 8.89E-09 | 0.004049 | 1        | 0.349651 | 0.096618 | 1        | 1        | 1        | 1        | 1        | 0.4      | 0.02941  | 1        | 0.001904 |          |
| 42 | 49091972  | 49092009  | CNT1              | 2.48E-07 | 3.03E-05 | 0.004152 | 1        | 0.003296 | 1        | 0.027027 | 1        | 1        | 1        | 1        | 1        | 1        | 7.01E-27 | 1        | 0.078089 |
| 6  | 108197860 | 108197894 | SEC63             | 0.008629 | 4.64E-05 | 0.004193 | 1        | 1        | 1        | 1        | 1        | 1        | 1        | 1        | 1        | 1        | 0.000581 | 1        | 1        |
| 18 | 33611062  | 33611092  | RPRD1A            | 1.53E-09 | 0.048276 | 0.004263 | 1        | 1        | 1        | 1        | 1        | 1        | 1        | 1        | 1        | 1        | 9.11E-14 | 1        | 0.159128 |
| 4  | 9510783   | 95107994  | SMARCD1           | 0.000107 | 1.73E-11 | 0.004267 | 1        | 1        | 1        | 1        | 1        | 1        | 0.016667 | 0.26087  | 1.07E-06 | 1        | 1        | 1        |          |
| 4  | 66286113  | 66286124  | EPHAs             | 0.000141 | 4.13E-06 | 0.004354 | 1        | 1        | 1        | 1        | 1        | 1        | 1        | 1        | 0.003008 | 1.16E-05 | 1        | 0.008653 |          |
| 14 | 7794905   | 7794925   | AHS1A             | 3.31E-09 | 0.00027  | 0.004408 | 1        | 0.156424 | 1        | 1        | 1        | 1        | 1        | 1        | 1        | 1        | 8.5E-20  | 1        | 0.16297  |
| 11 | 11406385  | 11406391  | NR3C3             | 7.94E-08 | 4.18E-08 | 0.004416 | 1        | 1        | 1        | 1        | 1        | 1        | 0.00201  | 0.045455 | 1        | 1        | 5.57E-09 | 1        | 0.00292  |
| 15 | 158582497 | 158582509 | SPTA1             | 7.05E-12 | 2.35E-11 | 0.004505 | 1        | 0.040023 | 1        | 1        | 1        | 1        | 1        | 0.026316 | 1        | 1        | 7.9E-06  | 0.04878  | 1        |
| 5  | 50045960  | 50045967  | PARP8             | 9.91E-10 | 2.61E-07 | 0.004505 | 1        | 0.129487 | 1        | 1        | 1        | 1        | 1        | 0.020408 | 1        | 1        | 4.9E-07  | 0.031746 | 0.195665 |
| 10 | 94369023  | 94369100  | KIF11             | 2.95E-06 | 0.05767  | 0.004662 | 0.024589 | 0.41883  | 0.052748 | 1        | 0.003083 | 0.257291 | 1        | 0.190476 | 1        | 0.031677 | 1        | 0.395397 |          |
| 3  | 142094816 | 142094843 | XRN1              | 5.85E-06 | 0.035832 | 0.004706 | 1        | 0.24069  | 1        | 1        | 0.076923 | 0.106219 | 1        | 0.190476 | 1        | 0.031677 | 1        | 0.395397 |          |
| 3  | 169574462 | 169574474 | LRR3C1            | 4.58E-05 | 2.09E-11 | 0.004707 | 1        | 1        | 1        | 1        | 1        | 1        | 1        | 0.019231 | 1        | 1        | 0.002318 | 1        | 0.217746 |
| 8  | 6743588   | 6743599   | C8orf44-SGK3,SGK3 | 0.000211 | 2.49E-10 | 0.004762 | 1        | 1        | 1        | 1        | 1        | 1        | 1        | 1        | 1        | 1        | 2.39E-11 | 1        | 0.195365 |
| 10 | 61460385  | 61460387  | ANKK1             | 4.12E-07 | 2.87E-09 | 0.004762 | 1        | 1        | 1        | 1        | 1        | 1        | 0.02438  | 0.045455 | 1        | 1        | 6.59E-09 | 1        | 0.139679 |
| 15 | 9269405   | 92694158  | SLCO3A1           | 1.39E-05 | 2.24E-10 | 0.004762 | 0.081818 | 1        | 1        | 1        | 1        | 1        | 0.042105 | 1        | 1        | 1        | 6.07E-10 | 0.002292 | 1        |
| 3  | 160960468 | 160960478 | NMD3              | 0.002379 | 4.11E-05 | 0.004898 | 0.009009 | 1        | 0.056818 | 1        | 1        | 1        | 1        | 1        | 1        | 1        | 5.97E-07 | 0.02222  | 0.092347 |
| 15 | 195956726 | 195956749 | SLS1A             | 1.7E-05  | 0.007538 | 0.004898 | 1        | 0.095562 | 1        | 0.181411 | 1        | 0.357143 | 0.007928 | 1        | 1        | 1        | 0.007928 | 1        | 1        |
| 10 | 69957322  | 69957333  | MYPN              | 0.000102 | 2.27E-06 | 0.004902 | 1        | 1        | 1        | 1        | 1        | 1        | 1        | 1        | 1        | 1        | 0.004783 | 1        | 1        |
| 15 | 85659150  | 85659167  | PDE8A             | 1.34E-06 | 4.43E-12 | 0.004926 | 1        | 0.105239 | 0.273179 | 0.098467 | 1        | 0.031127 | 1        | 1        | 1        | 1        | 0.05943  | 1        | 0.040973 |
| 3  | 130447530 | 130447564 | PIK3R4            | 2.01E-10 | 2.18E-05 | 0.004995 | 1        | 1        | 1        | 1        | 1        | 0.046506 | 1        | 1        | 1        | 1        | 3E-13    | 1        | 0.205834 |
| 6  | 45603831  | 45603834  | ANKK4             | 0.000633 | 1.61E-12 | 0.004995 | 0.271429 | 1        | 0.023622 | 1        | 1        | 1        | 1        | 1        | 1        | 1        | 0.019076 | 1        | 0.001904 |
| 1  | 15533023  | 15533023  | AHHL1             | 1.24E-08 | 2.74E-10 | 0.005102 | 1        | 1        | 1        | 1        | 1        | 1        | 1        | 1        | 1        | 1        | 3.05E-05 | 0.003939 | 0.274944 |
| 15 | 49097732  | 49097750  | CEP152            | 6.63E-11 | 4.07E-12 | 0.005102 | 1        | 1        | 1        | 0.021127 | 0.033471 | 0.014456 | 1        | 1        | 1        | 1        | 5.14E-20 | 1        | 0.004161 |
| 1  | 154144673 | 154144694 | TPM3              | 0.005924 | 4.8E-05  | 0.005139 | 1        | 1        | 0.016667 | 1        | 1        | 1        | 0.008403 | 1        | 1        | 1        | 2.86E-08 | 1        | 0.007175 |
| 15 | 89009056  | 89009067  | MIRPL46           | 4.24E-06 | 1.68E-09 | 0.005348 | 1        | 1        | 1        | 1        | 1        | 1        | 1        | 1        | 1        | 1        | 0.125646 | 1        | 0.005763 |
| 4  | 57677780  | 57677805  | SPINK2            | 0.000126 | 3.24E-08 | 0.005348 | 1        | 1        | 1        | 1        | 1        | 1        | 1        | 1        | 1        | 1        | 0.003675 | 1        | 1        |
| 9  | 37768286  | 37768304  | TRMT10B           | 0.000225 | 9.04E-07 | 0.005348 | 0.117647 | 1        | 1        | 1        | 1        | 1        | 1        | 1        | 1        | 1        | 0.000375 | 0.074746 | 0.001329 |
| 5  | 145951383 | 145951380 | NR3C1             | 2.2E-11  | 5.51E-08 | 0.005348 | 1        | 1        | 1        | 1        | 1        | 1        | 1        | 1        | 1        | 1        | 1.71E-11 | 1        | 0.00254  |
| 11 | 110764978 | 110765003 | LRN3              | 6.93E-12 | 2.88E-08 | 0.005464 | 1        | 1        | 1        | 1        | 1        | 0.02438  | 0.045455 | 1        | 1        | 1        | 5.57E-09 | 1        | 0.00292  |
| 10 | 22676732  | 22676743  | SPAG5             | 4.92E-07 | 1.66E-09 | 0.00555  | 0.188269 | 1        | 1        | 1        | 0.034041 | 1        | 1        | 1        | 1        | 1        | 8.16E-05 | 0.039474 | 0.140059 |
| 13 | 38171301  | 38171312  | POSTN             | 1.7E-08  | 3.65E-13 | 0.00555  | 1        | 0.087231 | 1        | 1        | 1        | 0.054945 | 1        | 1        | 1        | 1        | 6.62E-13 | 0.047899 | 0.000414 |
| 5  | 65073389  | 65073400  | NLN               | 8.88E-05 | 3.22E-05 | 0.00555  | 1        | 1        | 1        | 1        | 1        | 1        | 1        | 1        | 1        | 1        | 3.85E-05 | 1        | 0.287816 |
| 10 | 109480681 | 109480693 | CEP57L1           | 1.24E-07 | 3.69E-10 | 0.00555  | 1        | 0.133043 | 1        | 1        | 1        | 1        |          |          |          |          |          |          |          |



|    |           |           |                                         |          |          |          |          |          |          |   |   |   |   |   |   |   |   |   |   |   |          |          |          |
|----|-----------|-----------|-----------------------------------------|----------|----------|----------|----------|----------|----------|---|---|---|---|---|---|---|---|---|---|---|----------|----------|----------|
| 6  | 118953826 | 118953837 | CEP85L                                  | 0.000119 | 7.56E-05 | 0.034483 | 1        | 1        | 1        | 1 | 1 | 1 | 1 | 1 | 1 | 1 | 1 | 1 | 1 | 1 | 0.179487 | 1        | 1        |
| 15 | 157496153 | 157496197 | ARI01B                                  | 0.0119   | 0.000152 | 0.034483 | 1        | 1        | 1        | 1 | 1 | 1 | 1 | 1 | 1 | 1 | 1 | 1 | 1 | 1 | 0.005082 | 0.015038 | 1        |
| X  | 132458578 | 132458605 | GPC4                                    | 0.000512 | 5.74E-11 | 0.034483 | 1        | 1        | 1        | 1 | 1 | 1 | 1 | 1 | 1 | 1 | 1 | 1 | 1 | 1 | 0.340887 | 1        | 0.026786 |
| 2  | 22780328  | 22780344  | COU44                                   | 2.91E-08 | 3.2E-05  | 0.039382 | 0.413631 | 0.3975   | 1        | 1 | 1 | 1 | 1 | 1 | 1 | 1 | 1 | 1 | 1 | 1 | 0.004056 | 1        | 0.010986 |
| 4  | 152065328 | 152065339 | SHD19D                                  | 0.001181 | 2.14E-12 | 0.035088 | 1        | 1        | 1        | 1 | 1 | 1 | 1 | 1 | 1 | 1 | 1 | 1 | 1 | 1 | 0.001186 | 0.034483 | 1        |
| 12 | 64020310  | 64020330  | DPY1912                                 | 0.000452 | 0.000898 | 0.035714 | 1        | 1        | 1        | 1 | 1 | 1 | 1 | 1 | 1 | 1 | 1 | 1 | 1 | 1 | 1        | 1        | 1        |
| 16 | 11862364  | 11862391  | ZC3H7A                                  | 1.2E-07  | 1.55E-12 | 0.035714 | 1        | 1        | 1        | 1 | 1 | 1 | 1 | 1 | 1 | 1 | 1 | 1 | 1 | 1 | 1        | 0.035088 | 1        |
| 18 | 21758169  | 21758196  | OSBP1A                                  | 8.65E-08 | 2.1E-05  | 0.035714 | 1        | 1        | 1        | 1 | 1 | 1 | 1 | 1 | 1 | 1 | 1 | 1 | 1 | 1 | 1        | 0.117974 | 1        |
| 2  | 234178775 | 234178807 | ATG16L1                                 | 4.08E-07 | 0.000853 | 0.035714 | 1        | 1        | 1        | 1 | 1 | 1 | 1 | 1 | 1 | 1 | 1 | 1 | 1 | 1 | 1        | 1        | 1        |
| 5  | 139817996 | 139818007 | GHCD1,ANKHD1-EIF4EBP3                   | 4.11E-07 | 7.03E-12 | 0.035714 | 1        | 1        | 1        | 1 | 1 | 1 | 1 | 1 | 1 | 1 | 1 | 1 | 1 | 1 | 1        | 1        | 1        |
| 7  | 16705323  | 16705341  | CYC21                                   | 0.000289 | 0.000442 | 0.035714 | 0.144352 | 1        | 1        | 1 | 1 | 1 | 1 | 1 | 1 | 1 | 1 | 1 | 1 | 1 | 1        | 1        | 1        |
| 1  | 115537600 | 115537611 | CYC21                                   | 0.000716 | 1.07E-09 | 0.035714 | 1        | 1        | 1        | 1 | 1 | 1 | 1 | 1 | 1 | 1 | 1 | 1 | 1 | 1 | 1        | 0.003256 | 1        |
| 17 | 10596306  | 10596316  | SC01                                    | 7.54E-05 | 4.85E-06 | 0.035714 | 1        | 1        | 1        | 1 | 1 | 1 | 1 | 1 | 1 | 1 | 1 | 1 | 1 | 1 | 1        | 0.033898 | 0.037037 |
| 19 | 14910637  | 14910648  | OR7C1                                   | 0.002704 | 7.2E-07  | 0.035714 | 1        | 1        | 1        | 1 | 1 | 1 | 1 | 1 | 1 | 1 | 1 | 1 | 1 | 1 | 1        | 0.206897 | 1        |
| 4  | 95506684  | 95506702  | PDLM15                                  | 0.004041 | 1.62E-06 | 0.035714 | 1        | 1        | 1        | 1 | 1 | 1 | 1 | 1 | 1 | 1 | 1 | 1 | 1 | 1 | 1        | 1        | 1        |
| 1  | 74818936  | 74818947  | FGPT-TNNI3K,TNNI3K                      | 1.69E-06 | 7.96E-09 | 0.036364 | 1        | 1        | 1        | 1 | 1 | 1 | 1 | 1 | 1 | 1 | 1 | 1 | 1 | 1 | 1        | 0.000511 | 1        |
| 18 | 182399497 | 182399529 | TIGM4                                   | 6.69E-06 | 0.00035  | 0.036364 | 1        | 1        | 1        | 1 | 1 | 1 | 1 | 1 | 1 | 1 | 1 | 1 | 1 | 1 | 1        | 0.022269 | 1        |
| 11 | 63663130  | 63663153  | MMR2C                                   | 4.47E-07 | 0.00968  | 0.036437 | 0.147292 | 1        | 1        | 1 | 1 | 1 | 1 | 1 | 1 | 1 | 1 | 1 | 1 | 1 | 1        | 1        | 1        |
| 16 | 28842257  | 28842275  | TKN2L                                   | 6.86E-08 | 8.42E-12 | 0.036993 | 0.04717  | 1        | 1        | 1 | 1 | 1 | 1 | 1 | 1 | 1 | 1 | 1 | 1 | 1 | 1        | 1        | 0.108015 |
| 1  | 162769510 | 162769522 | HSD17B7                                 | 1.62E-06 | 0.000133 | 0.037037 | 1        | 1        | 1        | 1 | 1 | 1 | 1 | 1 | 1 | 1 | 1 | 1 | 1 | 1 | 1        | 1        | 1        |
| 1  | 63096855  | 63096873  | DOCK7                                   | 0.005056 | 0.027453 | 0.037037 | 1        | 1        | 1        | 1 | 1 | 1 | 1 | 1 | 1 | 1 | 1 | 1 | 1 | 1 | 1        | 0.009434 | 1        |
| 11 | 47310608  | 47310619  | IMAD                                    | 0.002407 | 1.72E-06 | 0.037037 | 1        | 1        | 1        | 1 | 1 | 1 | 1 | 1 | 1 | 1 | 1 | 1 | 1 | 1 | 1        | 0.033708 | 0.032609 |
| 12 | 14947675  | 14947706  | WBP11                                   | 6.18E-06 | 1.96E-07 | 0.037037 | 0.028369 | 1        | 1        | 1 | 1 | 1 | 1 | 1 | 1 | 1 | 1 | 1 | 1 | 1 | 1        | 0.010989 | 1        |
| 12 | 14949720  | 14949731  | WBP11                                   | 0.000252 | 6.9E-09  | 0.037037 | 1        | 1        | 1        | 1 | 1 | 1 | 1 | 1 | 1 | 1 | 1 | 1 | 1 | 1 | 1        | 0.073529 | 1        |
| 12 | 53757482  | 53757503  | CSAD                                    | 0.000182 | 8.52E-07 | 0.037037 | 0.011628 | 1        | 1        | 1 | 1 | 1 | 1 | 1 | 1 | 1 | 1 | 1 | 1 | 1 | 1        | 0.060976 | 1        |
| 15 | 90844703  | 90844723  | RSF1                                    | 5.18E-08 | 7.12E-11 | 0.037037 | 1        | 1        | 1        | 1 | 1 | 1 | 1 | 1 | 1 | 1 | 1 | 1 | 1 | 1 | 1        | 0.057592 | 1        |
| 3  | 148711906 | 148711917 | GVG1                                    | 6.67E-07 | 2.14E-12 | 0.037037 | 1        | 1        | 1        | 1 | 1 | 1 | 1 | 1 | 1 | 1 | 1 | 1 | 1 | 1 | 1        | 1        | 1        |
| 8  | 91929652  | 91929661  | NECAB1                                  | 2.49E-05 | 0.003799 | 0.037424 | 1        | 1        | 1        | 1 | 1 | 1 | 1 | 1 | 1 | 1 | 1 | 1 | 1 | 1 | 1        | 0.294118 | 1        |
| 12 | 7818348   | 7818403   | APOBEC1                                 | 0.036018 | 1        | 0.0375   | 1        | 1        | 1        | 1 | 1 | 1 | 1 | 1 | 1 | 1 | 1 | 1 | 1 | 1 | 1        | 1        | 1        |
| 7  | 22190131  | 22190150  | RAPGEF5                                 | 8.04E-09 | 2.58E-10 | 0.037662 | 1        | 1        | 1        | 1 | 1 | 1 | 1 | 1 | 1 | 1 | 1 | 1 | 1 | 1 | 1        | 0.056604 | 1        |
| 1  | 151492610 | 151492637 | CGN                                     | 0.001523 | 4.12E-05 | 0.037736 | 0.115385 | 1        | 1        | 1 | 1 | 1 | 1 | 1 | 1 | 1 | 1 | 1 | 1 | 1 | 1        | 1        | 1        |
| 11 | 94602309  | 94602345  | AMOTL1                                  | 0.000236 | 0.005347 | 0.037736 | 1        | 1        | 1        | 1 | 1 | 1 | 1 | 1 | 1 | 1 | 1 | 1 | 1 | 1 | 1        | 1        | 1        |
| 7  | 2983927   | 29839285  | TKN2L                                   | 9.18E-10 | 1.35E-08 | 0.037831 | 0.010582 | 1        | 1        | 1 | 1 | 1 | 1 | 1 | 1 | 1 | 1 | 1 | 1 | 1 | 1        | 1        | 1        |
| 3  | 122081881 | 122081893 | CDC55                                   | 7.55E-08 | 2.63E-11 | 0.037736 | 0.011364 | 1        | 1        | 1 | 1 | 1 | 1 | 1 | 1 | 1 | 1 | 1 | 1 | 1 | 1        | 0.24     | 1        |
| 6  | 10989873  | 10989887  | ELOVL2                                  | 0.002253 | 3.51E-06 | 0.037736 | 0.028302 | 1        | 1        | 1 | 1 | 1 | 1 | 1 | 1 | 1 | 1 | 1 | 1 | 1 | 1        | 0.070463 | 1        |
| 9  | 19350919  | 19350938  | DENNDAC                                 | 4.24E-06 | 6.16E-07 | 0.037736 | 1        | 1        | 1        | 1 | 1 | 1 | 1 | 1 | 1 | 1 | 1 | 1 | 1 | 1 | 1        | 1        | 1        |
| 12 | 126075709 | 126075734 | HEY2                                    | 5.04E-11 | 9.6E-11  | 0.037836 | 0.439542 | 0.175413 | 0.006278 | 1 | 1 | 1 | 1 | 1 | 1 | 1 | 1 | 1 | 1 | 1 | 1        | 0.091206 | 1        |
| 2  | 183066377 | 183066403 | PDE1A                                   | 3.87E-06 | 1.56E-05 | 0.037975 | 1        | 1        | 1        | 1 | 1 | 1 | 1 | 1 | 1 | 1 | 1 | 1 | 1 | 1 | 1        | 0.005682 | 0.016949 |
| 12 | 113645152 | 113645163 | CCD                                     | 2.62E-06 | 4.8E-09  | 0.038462 | 1        | 1        | 1        | 1 | 1 | 1 | 1 | 1 | 1 | 1 | 1 | 1 | 1 | 1 | 1        | 0.007143 | 1        |
| 11 | 22050901  | 22050921  | CCDC66                                  | 5.38E-05 | 8.44E-08 | 0.038462 | 0.025157 | 0.073036 | 1        | 1 | 1 | 1 | 1 | 1 | 1 | 1 | 1 | 1 | 1 | 1 | 1        | 0.175444 | 1        |
| 14 | 103425946 | 103425957 | CD4ZBPB                                 | 0.000496 | 1.75E-05 | 0.038462 | 1        | 1        | 1        | 1 | 1 | 1 | 1 | 1 | 1 | 1 | 1 | 1 | 1 | 1 | 1        | 0.2381   | 0.166667 |
| 19 | 43689403  | 43689434  | PGS5                                    | 0.000565 | 0.040627 | 0.038462 | 1        | 1        | 1        | 1 | 1 | 1 | 1 | 1 | 1 | 1 | 1 | 1 | 1 | 1 | 1        | 1        | 1        |
| 22 | 26899774  | 26899785  | TFPI1                                   | 6.75E-09 | 5.49E-05 | 0.038462 | 0.004695 | 1        | 1        | 1 | 1 | 1 | 1 | 1 | 1 | 1 | 1 | 1 | 1 | 1 | 1        | 0.102823 | 1        |
| 5  | 130857217 | 130857228 | RAPGEF6                                 | 0.000737 | 9.47E-09 | 0.038462 | 1        | 1        | 1        | 1 | 1 | 1 | 1 | 1 | 1 | 1 | 1 | 1 | 1 | 1 | 1        | 1        | 1        |
| 1  | 155556426 | 155556438 | ASH1L-AS1(dist=22691),MSTO1(dist=23523) | 3.13E-06 | 6.92E-12 | 0.038462 | 0.019566 | 1        | 1        | 1 | 1 | 1 | 1 | 1 | 1 | 1 | 1 | 1 | 1 | 1 | 1        | 0.031056 | 1        |
| 3  | 122271204 | 122271215 | PARR9                                   | 1.05E-05 | 0.000158 | 0.038524 | 1        | 1        | 1        | 1 | 1 | 1 | 1 | 1 | 1 | 1 | 1 | 1 | 1 | 1 | 1        | 0.031915 | 1        |
| 3  | 56605379  | 56605427  | CCDC66                                  | 0.000775 | 8.44E-08 | 0.038571 | 1        | 1        | 1        | 1 | 1 | 1 | 1 | 1 | 1 | 1 | 1 | 1 | 1 | 1 | 1        | 0.1      | 1        |
| X  | 85597730  | 85597749  | RSF1                                    | 1.04E-10 | 7.14E-06 | 0.038571 | 0.017338 | 1        | 1        | 1 | 1 | 1 | 1 | 1 | 1 | 1 | 1 | 1 | 1 | 1 | 1        | 0.166667 | 1        |
| 13 | 79918806  | 79918816  | RRM2E                                   | 0.004099 | 8.8E-06  | 0.039216 | 1        | 1        | 1        | 1 | 1 | 1 | 1 | 1 | 1 | 1 | 1 | 1 | 1 | 1 | 1        | 0.021937 | 1        |
| 10 | 288184    | 288195    | ZMYND11                                 | 0.003507 | 4.91E-07 | 0.039409 | 1        | 1        | 1        | 1 | 1 | 1 | 1 | 1 | 1 | 1 | 1 | 1 | 1 | 1 | 1        | 1        | 1        |
| 7  | 131163354 | 131163376 | MKLN1                                   | 4.09E-06 | 5.46E-12 | 0.039409 | 0.161825 | 1        | 1        | 1 | 1 | 1 | 1 | 1 | 1 | 1 | 1 | 1 | 1 | 1 | 1        | 0.043122 | 1        |
| 12 | 44142419  | 44142447  | PUS7L                                   | 0.016655 | 4.51E-05 | 0.04     | 1        | 1        | 1        | 1 | 1 | 1 | 1 | 1 | 1 | 1 | 1 | 1 | 1 | 1 | 1        | 1        | 1        |
| 15 | 70992003  | 70992021  | UACA                                    | 1.66E-05 | 5.29E-05 | 0.04     | 0.056604 | 1        | 1        | 1 | 1 | 1 | 1 | 1 | 1 | 1 | 1 | 1 | 1 | 1 | 1        | 1        | 1        |
| 15 | 7386112   | 7386113   | PSM4                                    | 5.95E-12 | 9.15E-05 | 0.04     | 1        | 1        | 1        | 1 | 1 | 1 | 1 | 1 | 1 | 1 | 1 | 1 | 1 | 1 | 1        | 0.079184 | 1        |
| 15 | 81574808  | 81574857  | TSR                                     | 4.93E-08 | 4.88E-11 | 0.040178 | 1        | 1        | 1        | 1 | 1 | 1 | 1 | 1 | 1 | 1 | 1 | 1 | 1 | 1 | 1        | 1        | 1        |
| 21 | 15537721  | 15537732  | LPII                                    | 9.81E-05 | 9.71E-08 | 0.040816 | 1        | 1        | 1        | 1 | 1 | 1 | 1 | 1 | 1 | 1 | 1 | 1 | 1 | 1 | 1        | 0.199385 | 1        |
| 4  | 13371622  | 13371645  | RAB28                                   | 1.27E-11 | 3.04E-12 | 0.040816 | 1        | 1        | 1        | 1 | 1 | 1 | 1 | 1 | 1 | 1 | 1 | 1 | 1 | 1 | 1        | 0.027778 | 1        |
| 4  | 186288457 | 186288489 | LRP2BP                                  | 7.5E-11  | 4.28E-07 | 0.041096 | 1        | 1        | 1        | 1 | 1 | 1 | 1 | 1 | 1 | 1 | 1 | 1 | 1 | 1 | 1        | 0.199868 | 1        |
| 13 | 32893197  | 32893208  | BRCA2                                   | 0.00023  | 8.22E-13 | 0.041667 | 1        | 1        | 1        | 1 | 1 | 1 | 1 | 1 | 1 | 1 | 1 | 1 | 1 | 1 | 1        | 1        | 1        |
| 2  | 232320856 | 232320866 | NCL                                     | 0.006938 | 0.004255 | 0.041667 | 1        | 1        | 1        | 1 | 1 | 1 | 1 | 1 | 1 | 1 | 1 | 1 | 1 | 1 | 1        | 0.057143 | 0.00242  |
| 3  | 13219805  | 13219816  | DNAU1C3                                 | 2.57E-05 | 5.58E-07 | 0.041667 | 1        | 1        | 1        | 1 | 1 | 1 | 1 | 1 | 1 | 1 | 1 | 1 | 1 | 1 | 1        | 0.010101 | 1        |
| X  | 10030780  | 10030781  | NSFRBP1                                 | 0.000782 | 9.38E-08 | 0.041667 | 0.227755 | 1        | 1        | 1 | 1 | 1 | 1 | 1 | 1 | 1 | 1 | 1 | 1 | 1 | 1        | 0.166667 | 1        |
| 13 | 30829577  | 30829777  | KATNAL1                                 | 2.72E-05 | 4.91E-07 | 0.041667 | 0.246199 | 0.112391 | 1        | 1 | 1 | 1 | 1 | 1 | 1 | 1 | 1 | 1 | 1 | 1 | 1        | 0.035088 | 1        |
| 13 | 1838      |           |                                         |          |          |          |          |          |          |   |   |   |   |   |   |   |   |   |   |   |          |          |          |

|    |           |           |                                                |          |          |          |          |          |          |          |          |          |          |          |          |           |          |          |          |
|----|-----------|-----------|------------------------------------------------|----------|----------|----------|----------|----------|----------|----------|----------|----------|----------|----------|----------|-----------|----------|----------|----------|
| 20 | 37126168  | 37126180  | RALGAPB                                        | 8.66E-09 | 1.33E-11 | 0.06     | 0.011494 | 1        | 0.015385 | 0.233392 | 1        | 1        | 1        | 0.034483 | 1        | 4.34E-07  | 1        | 0.000362 |          |
| 18 | 214605    | 214622    | THOC1                                          | 0.005219 | 5.23E-07 | 1        | 0.011628 | 1        | 1        | 1        | 1        | 1        | 1        | 1        | 1        | 7.7E-05   | 1        | 1        |          |
| 16 | 4163683   | 4163694   | ADCY9                                          | 0.002974 | 1.35E-10 | 1        | 0.011698 | 1        | 1        | 1        | 1        | 1        | 1        | 1        | 1        | 1.61E-08  | 1        | 0.059327 |          |
| 6  | 119379471 | 11938993  | LRN4L1(dist=265476),LOC101927686(dist=1006742) | 0.003354 | 9.16E-11 | 0.153829 | 0.096777 | 0.077888 | 0.027027 | 1        | 1        | 1        | 0.032787 | 1        | 1        | 0.235932  | 1        | 1        |          |
| 14 | 76211938  | 76211949  | TTLL5                                          | 5.75E-05 | 4.47E-08 | 1        | 0.011834 | 1        | 0.03937  | 1        | 1        | 1        | 0.073735 | 1        | 1        | 1.93E-07  | 1        | 0.03285  |          |
| 10 | 93841262  | 93841273  | CPB3                                           | 2.46E-09 | 9.02E-08 | 0.052632 | 0.012121 | 0.07     | 1        | 0.009662 | 1        | 0.025641 | 0.054348 | 1        | 1        | 1.67E-06  | 1        | 0.01358  |          |
| 7  | 87056260  | 87056297  | ABCBA8                                         | 0.00638  | 1        | 0.206213 | 0.01227  | 0.18947  | 1        | 1        | 1        | 1        | 1        | 1        | 0.47619  | 0.289124  | 1        | 0.000369 |          |
| 10 | 134628521 | 134628532 | CFAP46                                         | 0.002296 | 1.95E-07 | 1        | 0.012579 | 0.02612  | 1        | 1        | 1        | 1        | 0.009346 | 1        | 1        | 1         | 4.18E-07 | 1        | 0.253664 |
| 17 | 4712563   | 4712580   | PLD2                                           | 0.162264 | 0.000659 | 1        | 0.012658 | 1        | 1        | 1        | 1        | 1        | 0.005126 | 0.017241 | 1        | 0.005546  | 1        | 0.185656 |          |
| 1  | 226027067 | 226027104 | EPHK1                                          | 0.166211 | 0.005419 | 1        | 0.012903 | 1        | 1        | 1        | 1        | 1        | 0.043478 | 1        | 0.007984 | 1         | 0.192957 |          |          |
| 3  | 196530448 | 196530459 | PAK2                                           | 2.06E-10 | 4.76E-11 | 1        | 0.012951 | 0.06908  | 0.017241 | 1        | 1        | 0.000013 | 1        | 1        | 1        | 5.31E-12  | 1        | 0.001038 |          |
| 14 | 53522638  | 53522650  | DDHD1                                          | 1.8E-06  | 3.5E-10  | 1        | 0.013158 | 1        | 1        | 1        | 1        | 0.042553 | 1        | 1        | 1        | 5.53E-07  | 0.045455 | 0.011402 |          |
| 4  | 120192436 | 120192448 | USP53                                          | 0.000458 | 7.94E-10 | 1        | 0.013243 | 1        | 1        | 1        | 1        | 1        | 1        | 1        | 1        | 3.84E-06  | 1        | 0.003703 |          |
| X  | 36901817  | 36901832  | FOXR2D2                                        | 0.039997 | 1.09E-12 | 0.2      | 0.013423 | 1        | 1        | 1        | 1        | 1        | 0.026786 | 1        | 1        | 0.000661  | 1        | 1        |          |
| 22 | 18599975  | 18599996  | CDKL5                                          | 1.26E-06 | 0.000538 | 1        | 0.013793 | 1        | 0.043103 | 1        | 1        | 1        | 0.093333 | 0.089852 | 1        | 0.066645  | 0.030769 | 0.012183 |          |
| 17 | 61728039  | 61728050  | TANC2                                          | 0.027474 | 3.82E-08 | 1        | 0.013889 | 0.28278  | 1        | 1        | 1        | 1        | 0.12037  | 1        | 1        | 0.015217  | 1        | 0.024362 |          |
| 5  | 137464887 | 137464899 | NMES                                           | 1.26E-05 | 1.37E-06 | 1        | 0.013986 | 1        | 1        | 1        | 1        | 1        | 0.076169 | 0.447368 | 0.000116 | 1         | 0.003381 |          |          |
| 3  | 20212754  | 20212778  | SGO1                                           | 6.52E-06 | 1.55E-10 | 0.095188 | 0.014384 | 1        | 0.024194 | 1        | 1        | 1        | 1        | 1        | 1        | 0.7E-13   | 1        | 0.153992 |          |
| 15 | 94841300  | 94841419  | MCTP2                                          | 4.76E-07 | 2.97E-06 | 1        | 0.014388 | 1        | 1        | 0.022989 | 1        | 1        | 0.016949 | 1        | 1        | 1         | 0.029851 | 0.071246 |          |
| 9  | 2097548   | 2097560   | SMARCA2                                        | 5.2E-10  | 3.32E-11 | 0.202742 | 0.014943 | 0.230038 | 1        | 1        | 1        | 0.042424 | 1        | 0.125899 | 1        | 0.35      | 1.18E-06 | 0.00468  |          |
| 3  | 175041806 | 175041870 | NAALADL2                                       | 3.89E-05 | 1.89E-05 | 1        | 0.014959 | 1        | 1        | 1        | 1        | 1        | 1        | 1        | 1        | 0.002021  | 1        | 0.075099 |          |
| 1  | 153954763 | 153954831 | RAB13                                          | 7.59E-07 | 0.001025 | 1        | 0.014706 | 1        | 0.139977 | 1        | 1        | 0.027778 | 1        | 1        | 0.028571 | 6.14E-05  | 1        | 0.016304 |          |
| 10 | 81036869  | 81036879  | ZMIZ2                                          | 0.002029 | 2.3E-07  | 1        | 0.014815 | 1        | 0.002596 | 0.001043 | 1        | 0.054054 | 0.015502 | 1        | 0.216180 | 0.096721  | 1        | 1        |          |
| 21 | 37591843  | 37591859  | DOPEY2                                         | 4.42E-06 | 2.08E-09 | 1        | 0.015038 | 1        | 0.016807 | 1        | 1        | 0.028571 | 0.093023 | 1        | 1        | 1.63E-05  | 1        | 1        |          |
| 6  | 119628160 | 119628177 | MAN1A1                                         | 0.000552 | 1.72E-07 | 1        | 0.015625 | 1        | 1        | 1        | 1        | 1        | 1        | 1        | 1        | 0.009623  | 1        | 0.015923 |          |
| 14 | 3633541   | 3633543   | TRAF3                                          | 0.000861 | 0.004043 | 1        | 0.015748 | 1        | 1        | 1        | 1        | 0.018182 | 0.078947 | 1        | 1        | 0.119314  | 1        | 0.016881 |          |
| 13 | 110833751 | 110833764 | COLA1L                                         | 1.52E-10 | 6.76E-06 | 0.066667 | 0.016129 | 0.04878  | 0.236953 | 1        | 1        | 1        | 0.018519 | 1        | 1        | 5.77E-12  | 1        | 0.151893 |          |
| 1  | 169797067 | 169797078 | C1orf112                                       | 0.000247 | 2.54E-12 | 1        | 0.016393 | 0.021739 | 6.57E-05 | 1        | 1        | 1        | 1        | 1        | 1        | 0.265734  | 1        | 0.161874 |          |
| 15 | 41508829  | 41508841  | EXD1                                           | 1.38E-11 | 0.000633 | 0.046875 | 0.016393 | 1        | 1        | 1        | 1        | 1        | 0.011905 | 1        | 1        | 3.43E-07  | 1        | 0.001128 |          |
| 7  | 67092937  | 67092960  | ACBA6                                          | 3.21E-05 | 0.000112 | 0.058824 | 0.016393 | 1        | 1        | 1        | 1        | 1        | 1        | 1        | 1        | 0.000529  | 1        | 1        |          |
| 2  | 173337669 | 173337681 | ITGA6                                          | 0.00032  | 2.15E-07 | 1        | 0.016399 | 1        | 1        | 1        | 1        | 0.022222 | 1        | 1        | 1        | 9.35E-05  | 1        | 0.015385 |          |
| 13 | 77404448  | 77404459  | KMCPB2                                         | 0.001718 | 1        | 1        | 0.016807 | 1        | 0.033333 | 1        | 1        | 0.032787 | 1        | 1        | 1        | 0.021388  | 1        | 0.121555 |          |
| 15 | 68028169  | 68028173  | TRAF2                                          | 0.001301 | 1.14E-06 | 1        | 0.017348 | 1        | 1        | 1        | 1        | 1        | 1        | 1        | 1        | 0.000000  | 1        | 0.001681 |          |
| 10 | 109247333 | 109247350 | E1F3E                                          | 0.000323 | 7.13E-05 | 0.083333 | 0.017391 | 1        | 1        | 1        | 1        | 1        | 0.029412 | 1        | 1        | 3.95E-05  | 1        | 1        |          |
| 2  | 201470233 | 201470249 | AOX1                                           | 4.22E-10 | 4.47E-07 | 0.148148 | 0.017544 | 1        | 0.04109  | 1        | 1        | 0.014925 | 0.066646 | 0.115942 | 0.2      | 1.1E-06   | 1        | 0.002679 |          |
| 1  | 21183819  | 21183838  | E1FAG3                                         | 9.98E-05 | 3.04E-06 | 1        | 0.017857 | 1        | 1        | 1        | 1        | 1        | 1        | 1        | 1        | 0.025683  | 1        | 1        |          |
| 2  | 88875981  | 88875993  | E1FAG3                                         | 2.38E-11 | 1.77E-10 | 1        | 0.018182 | 1        | 1        | 0.034884 | 1        | 0.000925 | 0.133333 | 3.74E-07 | 1        | 0.000049  | 0.124331 | 1        |          |
| 10 | 32742257  | 32742268  | CDC7                                           | 0.002086 | 2.14E-08 | 1        | 0.018349 | 1        | 0.035294 | 1        | 1        | 0.034483 | 0.018182 | 1        | 1        | 6.63E-09  | 0.030769 | 0.002229 |          |
| 18 | 61067251  | 61067268  | VPSB4                                          | 0.000552 | 0.003098 | 1        | 0.018692 | 1        | 1        | 1        | 1        | 1        | 1        | 1        | 1        | 0.178309  | 1        | 0.067416 |          |
| 19 | 4513225   | 4513237   | TRAF6                                          | 2.81E-09 | 0.000126 | 0.111111 | 0.018749 | 1        | 0.022707 | 0.25385  | 1        | 1        | 0.05042  | 1        | 0.035088 | 0.000192  | 0.044444 | 0.065558 |          |
| 12 | 36662141  | 36662154  | APOB1                                          | 5.31E-06 | 1.17E-09 | 1        | 0.019048 | 1        | 1        | 1        | 1        | 0.040323 | 1        | 0.263158 | 1        | 5.77E-12  | 1        | 0.014094 |          |
| 5  | 65029554  | 65029567  | NLN                                            | 6.99E-11 | 1.8E-05  | 1        | 0.019048 | 1        | 1        | 1        | 1        | 1        | 1        | 1        | 1        | 6.22E-05  | 1        | 1        |          |
| 10 | 102183695 | 102183706 | GNPTAB                                         | 1.98E-07 | 3.42E-11 | 1        | 0.019608 | 1        | 0.041096 | 1        | 1        | 1        | 1        | 1        | 1        | 0.001226  | 1        | 0.006662 |          |
| 16 | 74497442  | 74497453  | GLG1                                           | 9.65E-06 | 9.22E-07 | 0.054054 | 0.019753 | 1        | 1        | 1        | 1        | 1        | 1        | 1        | 1        | 0.0097973 | 1        | 1        |          |
| 18 | 23836102  | 23836113  | TFAB1                                          | 2.48E-05 | 5.56E-07 | 1        | 0.019995 | 1        | 1        | 1        | 1        | 1        | 1        | 1        | 1        | 1         | 6.1E-06  | 0.041096 | 0.043733 |
| 1  | 220789355 | 220789373 | MARK1                                          | 6.16E-09 | 0.002527 | 0.08     | 0.020833 | 1        | 1        | 1        | 0.085714 | 0.14017  | 1        | 0.018182 | 1        | 1         | 0.000462 |          |          |
| 13 | 29782253  | 29782278  | TRAF3                                          | 2.47E-11 | 3.18E-09 | 1        | 0.021799 | 0.257005 | 0.197668 | 1        | 1        | 1        | 1        | 0.1      | 0.003333 | 1         | 0.033787 |          |          |
| 19 | 20440881  | 20440893  | FNAB8(dist=129582),MIR1270(dist=69157)         | 0.000109 | 0.385568 | 1        | 0.021799 | 1        | 0.176668 | 1        | 1        | 0.133333 | 1        | 0.01875  | 1        | 0.153774  | 0.023199 | 0.006809 |          |
| 1  | 15890342  | 15890359  | DNAIC16                                        | 2.94E-08 | 0.001047 | 1        | 0.021978 | 1        | 0.020417 | 0.069093 | 1        | 0.053563 | 0.007546 | 1        | 1        | 2.97E-05  | 1        | 0.001026 |          |
| 7  | 67270277  | 67270288  | ACBA5                                          | 1.44E-06 | 3.38E-07 | 0.800782 | 0.022038 | 1        | 1        | 1        | 1        | 1        | 1        | 1        | 1        | 6.9E-06   | 1        | 0.001209 |          |
| 19 | 41798468  | 41798491  | HNRNPULL                                       | 0.266838 | 0.00131  | 1        | 0.022059 | 1        | 1        | 1        | 1        | 1        | 0.045455 | 0.003326 | 1        | 0.478211  | 1        | 1        |          |
| 7  | 16722392  | 16722403  | BZW2                                           | 2.89E-11 | 6.28E-13 | 0.0625   | 0.022408 | 1        | 1        | 1        | 1        | 0.000391 | 1        | 1        | 1        | 1.07E-12  | 0.0375   | 0.23487  |          |
| 17 | 29258446  | 29258463  | ADAP2                                          | 1.14E-09 | 3.02E-10 | 1        | 0.022727 | 0.193569 | 0.081781 | 1        | 1        | 1        | 1        | 1        | 1        | 0.000115  | 1        | 0.001136 |          |
| 3  | 15976423  | 15976433  | TRAF2                                          | 2.51E-05 | 0.000121 | 0.133333 | 0.022727 | 0.25385  | 1        | 1        | 1        | 0.05042  | 1        | 0.035088 | 0.000192 | 0.044444  | 0.065558 |          |          |
| 11 | 19628809  | 19628823  | CHODL                                          | 0.001310 | 0.037408 | 0.13219  | 0.022526 | 1        | 1        | 1        | 1        | 1        | 0.1875   | 1        | 0.090909 | 1         | 5.09E-05 | 0.004094 |          |
| 3  | 33434954  | 33434968  | URP1                                           | 3.33E-10 | 4.51E-05 | 0.050633 | 0.026316 | 0.059791 | 1        | 1        | 1        | 1        | 1        | 1        | 1        | 9.03E-11  | 1        | 1        |          |
| 17 | 43616611  | 43616622  | LRRC37A4P(dist=18722),LOC644172(dist=60870)    | 4.36E-05 | 0.0003   | 1        | 0.026549 | 0.352381 | 1        | 1        | 1        | 1        | 0.054545 | 0.125    | 0.000187 | 1         | 0.013652 |          |          |
| 15 | 42536227  | 42536238  | TMEM87A                                        | 7.21E-05 | 1.22E-09 | 1        | 0.026755 | 1        | 0.020833 | 1        | 1        | 0.008045 | 1        | 1        | 1        | 8.52E-13  | 0.02381  | 0.024613 |          |
| 6  | 84290141  | 84290156  | SNAP91                                         | 2.2E-05  | 3.03E-09 | 1        | 0.027523 | 1        | 0.106307 | 1        | 1        | 1        | 1        | 1        | 0.002741 | 0.146915  | 0.154023 |          |          |
| 5  | 167933673 | 167933685 | RARS                                           | 2.61E-08 | 2.42E-06 | 0.093702 | 0.028986 | 1        | 0.090172 | 1        | 1        | 0.020833 | 1        | 1        | 0.99E-08 | 0.073148  | 0.132413 |          |          |
| 17 | 19480586  | 19480594  | SICA7A1                                        | 0.001868 | 7.15E-06 | 1        | 0.029303 | 0.289321 | 1        | 1        | 1        | 1        | 0.426471 | 0.131493 | 1        | 0.29675   |          |          |          |
| 1  | 45284225  | 45284237  | TRAF6                                          | 2.81E-09 | 0.000126 | 0.111111 | 0.029749 | 0.222061 | 1        | 1        | 1        | 1        | 1        | 1        | 1        | 8.21E-13  | 1        | 0.04093  |          |
| 1  | 151665554 | 151665573 | SNK2                                           | 1.59E-06 | 2.54E-07 | 1        | 0.030187 | 0.079365 | 0.028302 | 1        | 1        | 0.027778 | 1        | 1        | 1        | 6.25E-05  | 1        | 1        |          |
| 1  | 179989020 | 179989038 | CEP350                                         | 0.000618 | 1.28E-10 | 0.097561 | 0.030417 | 1        | 1        | 1        | 1        | 0.017857 | 1        | 1        | 1        | 1.11E-05  | 0.031746 | 1        |          |
| 10 | 120795782 | 120795808 | E1F3A                                          | 3.9E-07  | 3.72E-09 | 1        | 0.030417 | 1        | 1        | 1        | 0.041667 | 1        | 1        | 1        | 1        | 0.001792  | 1        | 1        |          |
| 3  | 37599619  | 37599652  | PCTC                                           | 0.055411 | 0.001727 | 1        | 0.030769 | 1        | 1        | 1        | 1        | 1        | 1        | 1        | 1        | 0.000565  | 1        | 1        |          |
| 2  | 55900225  | 55900242  | PNF10                                          | 0.00027  | 6.48E-05 | 0.096341 | 0.030887 | 0.066667 | 1        | 1        | 0.013215 | 1        | 1        | 0.058    |          |           |          |          |          |



|    |           |           |                                            |           |          |          |   |          |          |          |          |          |          |          |          |          |          |          |          |          |         |
|----|-----------|-----------|--------------------------------------------|-----------|----------|----------|---|----------|----------|----------|----------|----------|----------|----------|----------|----------|----------|----------|----------|----------|---------|
| 1  | 29016705  | 29016737  | GMEB1                                      | 0.0012    | 1        | 1        | 1 | 0.031496 | 1        | 1        | 1        | 1        | 1        | 1        | 1        | 0.003166 | 1        | 1        | 0.00488  |          |         |
| 16 | 3117272   | 3117311   | LJ3                                        | 0.033433  | 0.185841 | 1        | 1 | 0.032127 | 1        | 1        | 0.114533 | 1        | 1        | 1        | 1        | 1        | 0.022585 | 1        | 0.046488 |          |         |
| 3  | 16041137  | 16041173  | SMCK                                       | 0.001009  | 0.011505 | 1        | 1 | 0.032258 | 1        | 1        | 1        | 1        | 0.014184 | 1        | 1        | 1        | 0.146636 | 1        | 0.089597 |          |         |
| 6  | 144814625 | 14481466  | TRNB                                       | 0.000685  | 1        | 1        | 1 | 0.032309 | 1        | 1        | 1        | 1        | 1        | 1        | 1        | 1        | 0.037183 | 1        | 1        |          |         |
| 4  | 47702411  | 47702471  | MSH2                                       | 0.081764  | 0.241206 | 0.148148 | 1 | 1        | 0.033058 | 1        | 1        | 1        | 1        | 1        | 1        | 1        | 0.038095 | 1        | 1        |          |         |
| 12 | 131476665 | 131476692 | GRP133                                     | 1.52E-05  | 0.000269 | 1        | 1 | 0.033464 | 1        | 1        | 1        | 1        | 0.028037 | 1        | 1        | 1        | 0.203998 | 1        | 0.000683 |          |         |
| 1  | 16354441  | 16354448  | CLCNKA                                     | 0.710243  | 1        | 1        | 1 | 0.034003 | 1        | 1        | 0.052623 | 1        | 1        | 0.109015 | 1        | 1        | 1        | 0.390688 | 1        | 0.155645 |         |
| 2  | 225035745 | 225035758 | SERPINE2(dist=131709),FAM1248(dist=207657) | 1.16E-06  | 4.82E-10 | 0.298246 | 1 | 1        | 0.034783 | 0.042662 | 0.025105 | 1        | 1        | 1        | 1        | 1        | 1        | 0.68E-07 | 1        | 1        |         |
| 3  | 139308383 | 139308420 | SPOL                                       | 3.16E-07  | 0.337203 | 1        | 1 | 0.034836 | 1        | 1        | 1        | 1        | 1        | 1        | 1        | 0.017266 | 0.002271 | 1        | 0.114155 |          |         |
| 10 | 43671378  | 43671392  | CGALNACT2                                  | 5.63E-06  | 1.12E-12 | 0.409944 | 1 | 1        | 0.035361 | 0.268822 | 0.064241 | 1        | 1        | 0.168354 | 1        | 0.108108 | 1        | 6.24E-07 | 0.023256 | 0.025642 |         |
| 1  | 660290008 | 660290016 | SRFBP2                                     | 0.000944  | 0.001259 | 0.133333 | 1 | 1        | 0.035733 | 1        | 1        | 1        | 1        | 1        | 1        | 1        | 1        | 0.038173 | 1        | 1        |         |
| 14 | 51062236  | 51062290  | ATL1                                       | 0.58E-45  | 0.012828 | 0.233943 | 1 | 1        | 0.036137 | 1        | 1        | 1        | 1        | 1        | 1        | 1        | 1        | 0.245105 | 1        | 1        |         |
| 17 | 45992566  | 45992604  | SP2-AS1                                    | 2.31E-09  | 4.25E-12 | 1        | 1 | 0.037004 | 1        | 1        | 1        | 1        | 1        | 1        | 1        | 1        | 1        | 3.51E-07 | 0.034483 | 0.001734 |         |
| 3  | 134210497 | 134210516 | TCF21                                      | 0.021574  | 6.31E-09 | 1        | 1 | 0.037553 | 1        | 1        | 1        | 1        | 1        | 1        | 1        | 0.272727 | 0.000288 | 1        | 1        |          |         |
| 6  | 38137959  | 38137970  | DLDC1                                      | 1.42E-08  | 5.3E-05  | 1        | 1 | 0.037879 | 1        | 1        | 1        | 1        | 1        | 1        | 1        | 0.022556 | 1        | 0.077291 | 1        | 1        |         |
| 2  | 69420574  | 69420634  | ANTXR1                                     | 2.07E-09  | 0.021611 | 0.109015 | 1 | 1        | 0.038462 | 1        | 1        | 1        | 1        | 1        | 1        | 1        | 1        | 2.21E-05 | 1        | 0.235594 |         |
| 1  | 218578726 | 218578745 | TGFB2                                      | 0.024401  | 0.000018 | 1        | 1 | 0.039398 | 1        | 1        | 1        | 1        | 1        | 1        | 1        | 0.041667 | 1        | 1        | 0.322682 | 1        | 1       |
| 1  | 155631307 | 155631342 | VYX1A                                      | 2.45E-06  | 1        | 0.192993 | 1 | 1        | 0.040333 | 1        | 1        | 1        | 1        | 1        | 1        | 0.001538 | 1.38E-06 | 1        | 0.001442 | 1        | 1       |
| 9  | 123945492 | 123945515 | NRB1A                                      | 7.58E-06  | 0.001226 | 1        | 1 | 0.040677 | 1        | 1        | 0.079967 | 1        | 1        | 0.039683 | 1        | 0.071429 | 1        | 0.000511 | 1        | 0.016293 |         |
| 19 | 45781081  | 45781156  | MARCKA                                     | 0.631693  | 1        | 1        | 1 | 0.040873 | 1        | 1        | 1        | 1        | 1        | 1        | 1        | 1        | 1        | 0.022589 | 1        | 0.016293 |         |
| 19 | 55452749  | 55452775  | NLRP7                                      | 0.182799  | 0.058708 | 1        | 1 | 0.041237 | 1        | 1        | 1        | 1        | 1        | 1        | 1        | 1        | 1        | 0.243243 | 1        | 0.11724  |         |
| 10 | 6273170   | 6273182   | PKFB3                                      | 0.000824  | 1.71E-06 | 1        | 1 | 0.04131  | 0.084767 | 1        | 1        | 1        | 0.071408 | 1        | 1        | 1        | 1        | 4.66E-07 | 1        | 1        |         |
| 22 | 26769464  | 26769477  | SEZ6L                                      | 0.002161  | 0.000282 | 1        | 1 | 0.041412 | 1        | 1        | 1        | 0.015267 | 0.25276  | 0.083333 | 1        | 1        | 1        | 2.96E-05 | 1        | 1        |         |
| 15 | 34553225  | 34553236  | SCL12A6                                    | 3.78E-05  | 1.6E-05  | 1        | 1 | 0.041667 | 0.282429 | 1        | 1        | 1        | 0.127354 | 1        | 1        | 1        | 1        | 2.77E-13 | 0.05     | 0.009323 |         |
| 7  | 20184025  | 20184076  | MCC1                                       | 0.145235  | 0.042165 | 1        | 1 | 0.042263 | 0.000652 | 1        | 1        | 1        | 1        | 1        | 1        | 1        | 0.24     | 1        | 0.032212 |          |         |
| 5  | 16760325  | 16760377  | TRIO10                                     | 0.007183  | 0.053524 | 1        | 1 | 0.043132 | 0.320721 | 0.260976 | 1        | 1        | 0.378763 | 1        | 1        | 0.083333 | 1        | 0.000511 | 1        | 0.161287 |         |
| 13 | 73636910  | 73636929  | KLFS                                       | 0.031519  | 0.096118 | 0.3      | 1 | 0.042779 | 0.011102 | 0.215868 | 1        | 1        | 0.120575 | 0.228469 | 1        | 0.333333 | 0.030854 | 1        | 0.042836 |          |         |
| 7  | 7780663   | 7780674   | AFAF1                                      | 0.00054   | 0.000469 | 0.181818 | 1 | 1        | 0.042857 | 1        | 1        | 1        | 1        | 1        | 1        | 1        | 1        | 1        | 0.05625  | 1        | 1       |
| 8  | 82583104  | 82583133  | IMP1A                                      | 0.010358  | 1        | 1        | 1 | 0.042857 | 1        | 1        | 1        | 1        | 1        | 1        | 1        | 1        | 1        | 2.86E-05 | 1        | 1        |         |
| 2  | 170413815 | 170413834 | FAXKD1                                     | 2.18E-10  | 9.28E-12 | 0.163647 | 1 | 1        | 0.042945 | 1        | 1        | 1        | 1        | 1        | 1        | 1        | 1        | 5.71E-05 | 0.001207 | 0.143992 |         |
| 2  | 84668258  | 84668269  | SUC1G1                                     | 3.61E-08  | 2.51E-11 | 1        | 1 | 0.043478 | 1        | 0.029412 | 1        | 1        | 0.049074 | 1        | 1        | 1        | 1        | 3.57E-10 | 1        | 0.007778 |         |
| 20 | 47269787  | 47269899  | PRKX1                                      | 0.002281  | 4.28E-06 | 0.088235 | 1 | 1        | 0.044248 | 1        | 1        | 1        | 1        | 1        | 1        | 1        | 1        | 1        | 0.148649 | 1        | 1       |
| 11 | 57421141  | 57421143  | TRIM19                                     | 0.000305  | 0.006663 | 0.066667 | 1 | 1        | 0.044333 | 1        | 1        | 1        | 1        | 1        | 0.040433 | 1        | 1        | 1        | 0.000511 | 0.016293 | 1       |
| 10 | 9365545   | 93655556  | BTAF1                                      | 0.006124  | 0.011434 | 1        | 1 | 0.045455 | 1        | 1        | 1        | 1        | 1        | 1        | 0.032    | 1        | 1        | 1        | 0.007746 | 1        | 0.05641 |
| 15 | 53815527  | 53815550  | WDR72                                      | 6.64E-05  | 0.001107 | 0.145299 | 1 | 1        | 0.045613 | 0.188619 | 1        | 1        | 1        | 0.312431 | 1        | 1        | 1        | 0.002223 | 1        | 0.044309 |         |
| 7  | 142139624 | 142139663 | TRYBP(dist=167556),MTRNR2L6(dist=234468)   | 0.001003  | 0.102765 | 1        | 1 | 0.046358 | 1        | 1        | 1        | 1        | 1        | 1        | 1        | 1        | 1        | 0.117647 | 1        | 1        |         |
| 7  | 74097328  | 74097361  | FAM169A                                    | 0.029969  | 0.254098 | 1        | 1 | 0.047619 | 1        | 1        | 1        | 1        | 1        | 1        | 1        | 1        | 1        | 0.132215 | 0.060606 | 1        | 1       |
| 12 | 6657402   | 6657417   | FFO1                                       | 0.00163   | 0.005516 | 1        | 1 | 0.047619 | 1        | 1        | 1        | 1        | 1        | 1        | 1        | 1        | 1        | 1        | 0.009775 | 1        | 1       |
| 5  | 54710447  | 54710491  | SKVLZ2                                     | 3.68E-06  | 3.89E-06 | 0.139373 | 1 | 1        | 0.047619 | 0.057851 | 1        | 1        | 0.015873 | 1        | 1        | 1        | 1        | 2.5E-06  | 1        | 0.1      |         |
| 11 | 32687086  | 32687103  | PRKRA                                      | 0.000305  | 5.26E-11 | 0.197031 | 1 | 1        | 0.048333 | 0.010659 | 0.047548 | 1        | 1        | 1        | 1        | 0.115314 | 1        | 0.001225 | 6.35E-05 | 0.016293 |         |
| 4  | 18360052  | 18360077  | TEMB3                                      | 2.48E-06  | 0.000197 | 0.089852 | 1 | 1        | 0.048804 | 0.012741 | 1        | 1        | 1        | 1        | 0.032066 | 0.230769 | 0.000441 | 0.013551 | 1        | 1        |         |
| 18 | 12955439  | 12955452  | SEH1L                                      | 2.86E-05  | 3.76E-07 | 1        | 1 | 0.048979 | 0.238761 | 0.031301 | 1        | 1        | 0.034188 | 0.010447 | 1        | 1        | 1        | 0.031977 | 1        | 1        |         |
| 3  | 7494245   | 7494274   | GRM7                                       | 1.43E-07  | 3.91E-05 | 0.221484 | 1 | 1        | 0.049558 | 1        | 0.22541  | 1        | 1        | 1        | 1        | 1        | 1        | 1        | 0.05045  | 1        | 0.07355 |
| 14 | 67848479  | 67848493  | EIF2S1                                     | 1.53E-09  | 1.11E-05 | 0.109524 | 1 | 1        | 0.049587 | 1        | 0.045796 | 1        | 1        | 0.015504 | 1        | 1        | 1        | 0.116171 | 1        | 0.040616 |         |
| 2  | 46583272  | 46583283  | EPAS1                                      | 0.066976  | 0.210665 | 1        | 1 | 1        | 1        | 2.13E-06 | 1        | 1        | 0.156883 | 0.307035 | 1        | 0.375    | 0.400724 | 1        | 0.420572 | 1        | 1       |
| 18 | 43314395  | 43314412  | SCL14A1                                    | 8.26E-05  | 1.67E-10 | 0.05814  | 1 | 1        | 4.24E-05 | 0.133774 | 1        | 1        | 0.058412 | 1        | 0.2      | 1.58E-06 | 1        | 0.199638 | 1        | 0.012827 |         |
| x  | 17883813  | 17883824  | PRKRI                                      | 0.045E-08 | 1.54E-07 | 1        | 1 | 1        | 0.000224 | 0.028571 | 1        | 1        | 0.156163 | 1        | 1        | 1        | 0.000511 | 0.035888 | 0.000511 | 0.016293 |         |
| 1  | 17151148  | 17151159  | PRRC1                                      | 0.007183  | 0.053524 | 1        | 1 | 0.049744 | 1        | 1        | 1        | 1        | 0.176136 | 1        | 1        | 1        | 1        | 0.01008  | 1        | 0.012827 |         |
| 12 | 122437594 | 122437605 | WDR66                                      | 1.87E-05  | 1.18E-09 | 1        | 1 | 1        | 0.000571 | 1        | 0.007692 | 0.015873 | 1        | 1        | 1        | 1        | 1        | 0.000637 | 0.037073 | 0.038647 | 1       |
| 12 | 19475610  | 19475621  | PLEKHA5                                    | 8.52E-07  | 1.25E-12 | 0.176136 | 1 | 1        | 0.0008   | 0.023256 | 1        | 1        | 1        | 0.069866 | 1        | 1        | 1        | 1.16E-06 | 1        | 1        |         |
| 6  | 97615907  | 97615918  | MIR548H3                                   | 0.000106  | 9.26E-10 | 1        | 1 | 1        | 0.000821 | 1        | 1        | 1        | 1        | 0.086957 | 1        | 1        | 1        | 3.99E-10 | 1        | 1        |         |
| 15 | 28427670  | 28427687  | HERC2                                      | 0.000398  | 6.15E-05 | 0.0625   | 1 | 1        | 0.009942 | 1        | 1        | 1        | 1        | 0.030303 | 1        | 1        | 1        | 0.000651 | 1        | 0.122389 |         |
| 3  | 50235208  | 50235218  | EBPL                                       | 0.001264  | 8.42E-06 | 0.131034 | 1 | 1        | 0.074074 | 0.009949 | 1        | 1        | 1        | 1        | 1        | 1        | 1        | 2.69E-07 | 1        | 1        |         |
| 4  | 7082786   | 7082788   | UGT2B28(dist=120018),UGT2B4(dist=65085)    | 0.52E-06  | 5.58E-07 | 0.206349 | 1 | 1        | 0.043333 | 0.010659 | 0.047548 | 1        | 1        | 1        | 0.115314 | 1        | 0.001225 | 6.35E-05 | 0.000806 | 1        | 1       |
| 10 | 160302352 | 160302363 | PRKCI                                      | 0.007243  | 8.66E-07 | 0.045516 | 1 | 1        | 0.110627 | 0.012741 | 1        | 1        | 0.016529 | 0.029465 | 1        | 1        | 1        | 0.000511 | 1        | 0.000511 |         |
| 17 | 7726468   | 7726698   | DNAH2                                      | 0.000443  | 0.02871  | 1        | 1 | 0.284963 | 0.001268 | 0.154999 | 1        | 1        | 0.061224 | 0.066863 | 1        | 1        | 1        | 0.022323 | 0.12     | 0.000745 | 1       |
| 3  | 36884530  | 36884544  | OSCP1                                      | 1.27E-11  | 2.29E-13 | 0.050847 | 1 | 1        | 1        | 0.001534 | 1        | 1        | 0.013746 | 1        | 1        | 1        | 1        | 7.54E-16 | 0.042857 | 3.16E-05 | 1       |
| 3  | 38938299  | 38938322  | SC11A1                                     | 6.3E-08   | 2.95E-06 | 0.069444 | 1 | 1        | 0.471529 | 0.00158  | 0.062176 | 1        | 1        | 0.029333 | 0.137931 | 1        | 1        | 0.002712 | 1        | 0.017123 |         |
| 7  | 56126036  | 56126047  | CCTFA1                                     | 0.027885  | 1.17E-06 | 1        | 1 | 0.064516 | 0.001721 | 1        | 1        | 1        | 1        | 1        | 1        | 1        | 1        | 1.53E-05 | 0.044444 | 0.144958 | 1       |
| 5  | 64084776  | 64084771  | CWC27                                      | 0.000355  | 3.63E-06 | 0.139373 | 1 | 1        | 0.536429 | 0.001762 | 1        | 1        | 1        | 0.012865 | 1        | 1        | 0.384615 | 0.000886 | 1        | 0.085224 | 1       |
| 15 | 50873112  | 50873154  | TRPM7                                      | 0.002047  | 3.45E-10 | 1        | 1 | 0.061663 | 0.001858 | 1        | 1        | 1        | 1        | 1        | 1        | 1        | 1        | 0.001204 | 1        | 0.012539 |         |
| 2  | 36848086  | 36848109  | MTR                                        | 1.29E-06  | 3.05E-13 | 1        | 1 | 1        | 0.128255 | 0.036361 | 1        | 1        | 0.017544 | 1        | 1        | 1        | 1        | 1        | 0.000511 | 0.062004 | 1       |
| 10 | 64975001  | 64975102  | IMID1C                                     | 9.05E-05  | 8.72E-09 | 1        | 1 | 0.002667 | 0.05695  | 1        | 1        | 0.058824 | 0.002864 | 1        | 1        | 1        | 1        | 0.000587 |          |          |         |

|    |           |           |                                      |          |          |          |          |          |          |          |          |          |          |          |          |           |          |          |          |         |   |
|----|-----------|-----------|--------------------------------------|----------|----------|----------|----------|----------|----------|----------|----------|----------|----------|----------|----------|-----------|----------|----------|----------|---------|---|
| 1  | 205594807 | 205594823 | ELK4                                 | 1.21E-08 | 8.58E-08 | 1        | 1        | 1        | 0.026906 | 1        | 1        | 1        | 1        | 1        | 1        | 9.43E-07  | 1        | 0.024071 |          |         |   |
| 1  | 150998221 | 150998235 | PRUNE                                | 6.98E-07 | 6.55E-10 | 0.05     | 1        | 0.39484  | 0.027149 | 0.21418  | 1        | 1        | 1        | 0.142622 | 1        | 1         | 0.000939 | 1        | 0.027833 |         |   |
| 9  | 74349917  | 74349938  | TME2M                                | 7.17E-07 | 2.64E-06 | 1        | 0.054412 | 0.252941 | 0.037289 | 0.150972 | 1        | 1        | 1        | 1        | 1        | 0.04329   | 1        | 0.001276 |          |         |   |
| 12 | 100994143 | 100994153 | COA213                               | 2.23E-07 | 3.27E-08 | 1        | 1        | 1        | 0.037387 | 0.037386 | 1        | 1        | 1        | 0.011364 | 1        | 0.019233  | 1        | 0.017494 |          |         |   |
| 3  | 160156367 | 160156378 | TRIM59                               | 0.003248 | 5.2E-09  | 1        | 1        | 1        | 0.027397 | 1        | 1        | 1        | 0.0625   | 1        | 1        | 1         | 7.09E-05 | 1        | 1        |         |   |
| 12 | 112143465 | 112143476 | ACAD10                               | 2.27E-05 | 4.71E-08 | 1        | 1        | 1        | 0.027778 | 1        | 1        | 1        | 1        | 1        | 1        | 0.058824  | 1        | 8.6E-13  | 1        | 1       |   |
| 17 | 3846565   | 3846561   | ATP2A3                               | 0.009142 | 5.22E-13 | 1        | 1        | 0.028119 | 1        | 1        | 1        | 1        | 1        | 1        | 1        | 0.114907  | 1        | 0.057692 | 1        | 1       |   |
| 5  | 50074331  | 50074342  | PARP8                                | 2.9E-05  | 1.49E-07 | 1        | 1        | 0.028169 | 1        | 1        | 1        | 1        | 1        | 1        | 1        | 1         | 0.000539 | 0.046512 | 0.133175 | 1       |   |
| 1  | 11933140  | 11933151  | TAMM4A(dist=44747),SYN2(dist=112683) | 0.051724 | 0.00482  | 0.119318 | 1        | 1        | 0.028202 | 1        | 1        | 1        | 1        | 1        | 1        | 1         | 0.020996 | 1        | 1        | 1       |   |
| 12 | 102159106 | 102159131 | GNPTAB                               | 2.95E-05 | 1.18E-07 | 0.075    | 1        | 1        | 0.028571 | 0.03125  | 1        | 1        | 1        | 1        | 1        | 1         | 0.000307 | 1        | 0.067797 | 1       |   |
| 12 | 89743441  | 89743453  | COA213                               | 0.009471 | 3.37E-08 | 1        | 0.076923 | 0.032951 | 1        | 1        | 0.138889 | 1        | 1        | 1        | 1        | 1         | 0.013726 | 1        | 0.065574 | 0.01379 |   |
| 8  | 63985465  | 63985476  | TTPA                                 | 2.58E-08 | 4.74E-11 | 1        | 1        | 1        | 0.028986 | 0.043592 | 1        | 1        | 1        | 1        | 1        | 1         | 7.44E-05 | 1        | 1        | 1       |   |
| 20 | 48467300  | 48467311  | SLC9A8                               | 6.28E-07 | 2.2E-09  | 0.068361 | 1        | 1        | 0.028986 | 0.040319 | 1        | 1        | 0.031127 | 0.060811 | 1        | 1         | 0.000562 | 0.061224 | 0.194397 | 1       |   |
| 2  | 179442292 | 179442314 | MIR548N,TTN-AS1                      | 2E-05    | 6.71E-08 | 0.05     | 1        | 0.029126 | 1        | 1        | 1        | 1        | 0.052632 | 1        | 0.166667 | 0.041197  | 0.001174 | 0.000672 | 1        | 1       |   |
| 3  | 20216049  | 20216075  | SGOL1                                | 3.33E-06 | 0.001087 | 0.05     | 1        | 0.029126 | 1        | 1        | 1        | 1        | 1        | 1        | 1        | 0.001199  | 1        | 1        | 1        | 1       |   |
| 2  | 192228419 | 192228444 | MYO1B                                | 1.54E-06 | 2.93E-12 | 1        | 1        | 0.029268 | 0.017021 | 1        | 1        | 1        | 0.014286 | 1        | 1        | 0.00914   | 1        | 0.003666 | 1        | 1       |   |
| 17 | 56688726  | 56688737  | TEX14                                | 1.02E-05 | 1.51E-10 | 1        | 1        | 0.029557 | 1        | 1        | 1        | 1        | 1        | 1        | 1        | 0.914E-05 | 1        | 1        | 1        | 1       |   |
| 12 | 119748135 | 119748152 | MMKOC                                | 0.039066 | 1.44E-06 | 0.234274 | 1        | 0.126843 | 0.032568 | 1        | 1        | 1        | 1        | 1        | 0.333333 | 7.49E-08  | 1        | 0.00188  | 1        |         |   |
| 13 | 110895916 | 110895936 | COA413                               | 1.04E-10 | 5.84E-13 | 1        | 0.171727 | 0.030203 | 1        | 1        | 1        | 1        | 0.018939 | 0.031579 | 1        | 5.09E-18  | 0.06014  | 0.004841 | 1        | 1       |   |
| 7  | 77394978  | 77395006  | RSNL1                                | 0.502016 | 0.000811 | 0.068182 | 1        | 1        | 0.030303 | 1        | 1        | 1        | 1        | 1        | 1        | 0.20438   | 1        | 1        | 1        | 1       |   |
| 2  | 37342007  | 37342019  | EIF2AK2                              | 4.4E-05  | 4.49E-12 | 0.058824 | 1        | 1        | 0.030303 | 1        | 1        | 1        | 1        | 0.030303 | 1        | 1         | 2.08E-10 | 1        | 1        | 1       | 1 |
| 2  | 271998    | 272015    | ACP1                                 | 1.6E-07  | 6.07E-08 | 0.090865 | 0.060962 | 0.448561 | 0.030801 | 0.10097  | 1        | 0.091966 | 0.007548 | 1        | 0.011858 | 6.13E-08  | 0.059988 | 0.216545 | 1        | 1       |   |
| 11 | 102395831 | 102395842 | MMP7                                 | 0.236842 | 0.002031 | 0.0625   | 1        | 0.030928 | 1        | 1        | 1        | 1        | 1        | 1        | 1        | 0.232143  | 1        | 0.056604 | 1        | 1       |   |
| 17 | 30538050  | 30538061  | RH0T1                                | 1.99E-06 | 2.17E-07 | 1        | 1        | 0.03125  | 0.020101 | 1        | 1        | 1        | 0.016667 | 1        | 1        | 6.59E-05  | 1        | 1        | 1        | 1       |   |
| 2  | 203807441 | 203807452 | CARF                                 | 5.76E-06 | 0.000596 | 1        | 1        | 0.131001 | 0.031746 | 1        | 1        | 1        | 1        | 1        | 1        | 7.85E-06  | 1        | 1        | 1        | 1       |   |
| 13 | 46646872  | 46646883  | COA213                               | 3.4E-05  | 3.11E-11 | 1        | 1        | 0.032051 | 0.010152 | 1        | 1        | 1        | 1        | 1        | 1        | 1         | 0.001216 | 1        | 0.000123 | 1       |   |
| 18 | 31463174  | 31463185  | NOLA                                 | 0.009513 | 1.13E-10 | 0.052632 | 0.06865  | 0.131725 | 0.032258 | 1        | 1        | 1        | 1        | 1        | 1        | 0.000562  | 0.061224 | 0.194397 | 1        | 1       |   |
| 4  | 120241806 | 120241818 | FABP2                                | 2.93E-07 | 5.36E-10 | 1        | 1        | 0.032258 | 1        | 1        | 1        | 1        | 0.075554 | 1        | 1        | 1.52E-06  | 0.024096 | 0.190918 | 1        | 1       |   |
| 13 | 132270728 | 132270740 | CTGF                                 | 0.039452 | 4.27E-05 | 0.206897 | 1        | 0.216216 | 0.032361 | 1        | 1        | 1        | 0.35304  | 1        | 0.214286 | 0.085255  | 0.232529 | 0.650209 | 1        | 1       |   |
| 10 | 52566432  | 52566445  | AICF                                 | 1.07E-07 | 3.89E-11 | 1        | 1        | 0.03252  | 0.012422 | 1        | 1        | 1        | 1        | 1        | 1        | 3.59E-06  | 1        | 0.185148 | 1        | 1       |   |
| 20 | 62571412  | 62571430  | UCKL1                                | 5.57E-09 | 5.89E-07 | 1        | 1        | 0.03252  | 1        | 1        | 1        | 1        | 1        | 1        | 1        | 0.088591  | 1        | 0.116883 | 1        | 1       |   |
| 19 | 5727206   | 5727228   | CATSPEED                             | 3.9E-07  | 3.41E-06 | 1        | 1        | 0.032651 | 0.015267 | 1        | 1        | 1        | 1        | 1        | 1        | 3.6E-08   | 1        | 1        | 1        | 1       |   |
| 2  | 42959216  | 42959235  | PCP4                                 | 0.003413 | 0.001089 | 1        | 1        | 0.032871 | 1        | 1        | 1        | 1        | 1        | 1        | 1        | 0.00272   | 1        | 0.260    | 1        | 1       |   |
| 1  | 11182261  | 11182279  | MTOR                                 | 3.7E-05  | 6.41E-05 | 1        | 1        | 0.033058 | 1        | 1        | 1        | 1        | 1        | 1        | 1        | 0.010546  | 0.044444 | 1        | 1        | 1       |   |
| 5  | 179665269 | 179665281 | MARP9                                | 2E-07    | 1.79E-06 | 0.069549 | 1        | 0.033493 | 1        | 1        | 1        | 1        | 0.002095 | 1        | 1        | 3.42E-12  | 0.027778 | 0.037461 | 1        | 1       |   |
| 1  | 117633133 | 117633144 | TF2                                  | 0.000237 | 2.63E-06 | 1        | 1        | 0.03352  | 1        | 0.004854 | 1        | 1        | 1        | 1        | 1        | 5.7E-08   | 1        | 2.24E-05 | 1        | 1       |   |
| 3  | 33160254  | 33160275  | SYNC                                 | 0.035714 | 5.34E-08 | 0.294872 | 1        | 0.033654 | 1        | 1        | 1        | 1        | 1        | 1        | 1        | 0.003008  | 1        | 1        | 1        | 1       |   |
| X  | 151393196 | 151393224 | GABRA3                               | 1.31E-07 | 7.16E-10 | 0.143955 | 1        | 0.033654 | 1        | 1        | 1        | 1        | 1        | 1        | 1        | 1.97E-06  | 1        | 0.241513 | 1        | 1       |   |
| 2  | 15840601  | 15840612  | ALCVR1                               | 4.9E-09  | 1.83E-05 | 0.055556 | 1        | 0.033708 | 1        | 1        | 0.009709 | 1        | 1        | 1        | 1        | 0.00734   | 1        | 0.053476 | 1        | 1       |   |
| 15 | 1531461   | 1531473   | PCP4                                 | 0.000344 | 0.000430 | 1        | 1        | 0.034091 | 1        | 1        | 1        | 1        | 1        | 1        | 1        | 9.1E-08   | 0.039216 | 0.6405   | 1        | 1       |   |
| 11 | 134055425 | 134055436 | PCNP03                               | 6.4E-05  | 1.59E-10 | 0.054054 | 1        | 0.034091 | 1        | 0.004808 | 1        | 1        | 0.035088 | 1        | 0.000415 | 0.041667  | 0.158895 | 1        | 1        | 1       |   |
| 10 | 285473    | 285500    | ZMYND11                              | 0.017474 | 0.000988 | 0.051724 | 1        | 0.117541 | 0.034483 | 1        | 1        | 1        | 1        | 1        | 1        | 0.188235  | 1        | 0.16347  | 1        | 1       |   |
| 13 | 131755652 | 131755666 | EBF3                                 | 2.56E-10 | 9.56E-07 | 1        | 1        | 0.034783 | 1        | 1        | 1        | 0.009623 | 0.076923 | 1        | 1        | 2.1E-06   | 1        | 1        | 1        | 1       |   |
| 4  | 128751775 | 128751787 | HSPA4L                               | 3.33E-08 | 6.65E-06 | 1        | 1        | 0.035461 | 1        | 1        | 1        | 1        | 1        | 1        | 1        | 0.83E-12  | 0.042553 | 0.083333 | 1        | 1       |   |
| 12 | 128385949 | 128385967 | LOC101928140                         | 5.17E-05 | 1.54E-05 | 0.066667 | 1        | 0.035714 | 0.017442 | 1        | 1        | 0.001207 | 1        | 1        | 0.186047 | 0.044776  | 0.186047 | 1        | 0.003778 | 1       |   |
| 20 | 47648454  | 47648481  | ARFGF2                               | 4.14E-06 | 7.2E-10  | 0.119898 | 1        | 0.035926 | 0.06059  | 0.009479 | 0.008065 | 1        | 1        | 1        | 1        | 0.06271   | 1        | 6.9E-05  | 1        | 1       |   |
| 6  | 43219480  | 43219491  | Ulk1,ULK2,ULK4P3                     | 0.000388 | 1.23E-10 | 0.1      | 1        | 0.036458 | 1        | 1        | 1        | 1        | 1        | 0.31348  | 1        | 0.00271   | 1        | 0.063604 | 1        | 1       |   |
| 15 | 73741691  | 73741694  | ULK4P1,ULK4P2,ULK4P3                 | 0.041753 | 0.138392 | 0.171437 | 1        | 0.24694  | 0.034091 | 1        | 1        | 1        | 0.038462 | 1        | 0.013699 | 1         | 0.004353 | 1        | 0.451653 | 1       |   |
| 17 | 66972364  | 66972375  | AC9A                                 | 0.000451 | 4.74E-07 | 0.117551 | 1        | 0.039116 | 0.036364 | 1        | 1        | 1        | 1        | 1        | 1        | 2.33E-06  | 1        | 1        | 1        | 1       |   |
| 2  | 203680554 | 203680568 | ICAIL                                | 5.55E-09 | 3.2E-10  | 0.199507 | 1        | 0.037034 | 1        | 1        | 1        | 0.02381  | 1        | 1        | 1        | 1.4E-06   | 1        | 0.156614 | 1        | 1       |   |
| 7  | 99687972  | 99687988  | COF56                                | 1.09E-11 | 8.24E-10 | 1        | 1        | 0.037556 | 1        | 1        | 1        | 0.064    | 1        | 1        | 1        | 0.001158  | 0.021978 | 1        | 1        | 1       |   |
| 14 | 75476004  | 75476015  | EIF2B2                               | 1.48E-05 | 1.84E-08 | 1        | 1        | 0.05     | 0.037972 | 1        | 1        | 1        | 1        | 1        | 1        | 4.93E-07  | 1        | 0.000375 | 1        | 1       |   |
| 12 | 19440358  | 19440369  | PLEKHA5                              | 0.005588 | 4.55E-05 | 1        | 1        | 0.038095 | 1        | 1        | 1        | 1        | 1        | 1        | 1        | 0.039865  | 1        | 0.137233 | 1        | 1       |   |
| 9  | 94693160  | 94693171  | PCP4                                 | 3.7E-10  | 4.04E-11 | 0.12     | 1        | 0.038458 | 1        | 1        | 0.007194 | 6.24E-05 | 1        | 0.013699 | 1        | 0.00075   | 0.043478 | 0.003604 | 1        | 1       |   |
| 1  | 20514896  | 20514907  | PLAGL2                               | 0.014515 | 0.000851 | 1        | 1        | 0.038462 | 1        | 1        | 1        | 1        | 1        | 1        | 1        | 0.004353  | 1        | 0.00156  | 1        | 1       |   |
| X  | 135053121 | 135053154 | MMGT1                                | 0.000146 | 3.12E-07 | 1        | 1        | 0.03876  | 1        | 1        | 1        | 1        | 1        | 1        | 1        | 4.07E-08  | 1        | 0.000516 | 1        | 1       |   |
| 13 | 32814024  | 32814043  | FRY                                  | 2.04E-10 | 1.55E-07 | 0.065789 | 1        | 0.039216 | 1        | 1        | 1        | 1        | 1        | 1        | 1        | 6.77E-07  | 1        | 0.011851 | 1        | 1       |   |
| 10 | 15113934  | 15113946  | OLAH                                 | 5.58E-07 | 6.24E-10 | 1        | 1        | 0.040265 | 1        | 1        | 1        | 1        | 1        | 1        | 1        | 6.96E-09  | 0.000974 | 5.11E-06 | 1        | 1       |   |
| 19 | 43358576  | 43358613  | PSG10P                               | 0.002658 | 1        | 1        | 0.060656 | 0.040265 | 1        | 1        | 1        | 1        | 1        | 0.25     | 0.029293 | 1         | 0.395969 | 1        | 1        | 1       |   |
| 13 | 132039801 | 132039901 | ENPP3                                | 2.8E-09  | 1.25E-11 | 0.15     | 1        | 0.040462 | 0.045243 | 1        | 1        | 0.040198 | 1        | 1        | 1        | 1.82E-06  | 1        | 0.207715 | 1        | 1       |   |
| 20 | 3565277   | 3565289   | ATRNL                                | 1.07E-11 | 2.15E-12 | 0.199417 | 1        | 0.040609 | 1        | 0.004854 | 0.013605 | 0.05     | 0.015385 | 1        | 0.051385 | 1         | 1.85E-06 | 0.003361 | 1        | 1       |   |
| 17 | 16137441  | 16137457  | PIGL1                                | 1.45E-11 | 1.04E-09 | 1        | 1        | 0.040816 | 0.05117  | 1        | 1        | 0.028571 | 1        | 1        | 1        | 1         | 0.000727 | 1        | 0.001405 | 1       | 1 |
| 2  | 31388311  | 31388327  | PIKH2B                               | 8.33E-08 | 3.86E-05 | 1        | 1        | 0.040816 | 1        | 1        | 0.095188 | 1        | 1        | 1        | 1        | 1.04E-07  | 1        | 0.141264 | 1        | 1       |   |
| 16 | 29375976  | 29376000  | SNX29P2                              | 1.5E-08  | 4.12E-05 | 1        | 1        | 0.041663 | 1        | 1        | 1        | 0.0      |          |          |          |           |          |          |          |         |   |

|    |           |           |                                           |          |          |          |   |          |          |          |          |          |          |          |           |           |          |          |          |
|----|-----------|-----------|-------------------------------------------|----------|----------|----------|---|----------|----------|----------|----------|----------|----------|----------|-----------|-----------|----------|----------|----------|
| 6  | 39047035  | 39047052  | GLP1R                                     | 0.127097 | 0.452319 | 0.098718 | 1 | 1        | 1        | 0.014925 | 1        | 1        | 0.114846 | 1        | 1         | 0.212121  | 1        | 0.246155 |          |
| X  | 108924091 | 108924121 | ACSL4                                     | 0.001219 | 5.57E-06 | 1        | 1 | 0.178473 | 1        | 0.014925 | 1        | 1        | 1        | 1        | 1         | 0.002153  | 1        | 0.177063 |          |
| 17 | 29206408  | 29206439  | ATAD5                                     | 2.27E-10 | 4.43E-10 | 0.059524 | 1 | 0.127032 | 1        | 0.015209 | 1        | 1        | 1        | 0.133333 | 1         | 2.38E-10  | 1        | 0.254039 |          |
| 14 | 32352871  | 32352881  | ATLA                                      | 0.023466 | 0.027758 | 0.05371  | 1 | 1        | 1        | 0.015209 | 1        | 1        | 1        | 1        | 1         | 0.031404  | 1        | 0.000444 |          |
| 1  | 36297998  | 36298033  | AGOA                                      | 1.3E-09  | 4.23E-06 | 0.09434  | 1 | 1        | 1        | 0.015385 | 1        | 1        | 1        | 1        | 1         | 1         | 1        | 0.003323 |          |
| 6  | 34831755  | 34831773  | UHRF1BP1                                  | 1.28E-07 | 3.05E-11 | 1        | 1 | 1        | 0.015464 | 1        | 0.042735 | 1        | 1        | 1        | 1         | 1         | 0.07E-10 | 1        | 0.004993 |
| 3  | 196236651 | 196236664 | SMCO1                                     | 6.19E-08 | 1.22E-10 | 1        | 1 | 1        | 0.015504 | 1        | 0.038645 | 1        | 1        | 1        | 1         | 1         | 1        | 0.008191 |          |
| 12 | 48880078  | 48880089  | C12orf54                                  | 5.49E-06 | 3.79E-06 | 1        | 1 | 1        | 0.015625 | 1        | 1        | 0.043478 | 0.166667 | 9.45E-10 | 0.308462  | 0.055375  | 1        | 0.008191 |          |
| 1  | 200544650 | 200544673 | KIF14                                     | 0.005644 | 0.000815 | 1        | 1 | 1        | 0.015655 | 1        | 0.041022 | 0.199362 | 1        | 0.318182 | 0.00035   | 0.153573  | 0.095672 | 1        |          |
| 3  | 150906314 | 150906344 | MED12L                                    | 0.001292 | 6.36E-09 | 1        | 1 | 1        | 0.015873 | 1        | 1        | 1        | 0.26087  | 8.23E-05 | 1         | 1         | 1        | 0.140967 |          |
| 8  | 53455013  | 53455034  | FAM131A                                   | 0.002141 | 0.001617 | 1        | 1 | 1        | 0.015914 | 1        | 1        | 1        | 1        | 1        | 1         | 1         | 1        | 0.003884 |          |
| 2  | 24521686  | 24521697  | TSP2                                      | 3.42E-07 | 5.97E-07 | 1        | 1 | 0.058955 | 0.01626  | 1        | 1        | 0.015625 | 1        | 1        | 1         | 0.301E-05 | 1        | 0.104728 |          |
| 12 | 101779979 | 101780006 | UTMD                                      | 0.002119 | 5.02E-05 | 0.054054 | 1 | 0.194662 | 0.016461 | 1        | 1        | 1        | 1        | 1        | 1         | 1         | 1        | 0.044335 |          |
| 3  | 32933344  | 32933365  | TRIM71                                    | 0.073855 | 0.377278 | 1        | 1 | 1        | 0.016517 | 1        | 0.322902 | 1        | 0.22619  | 0.203683 | 1         | 1         | 1        | 0.000432 |          |
| 10 | 16911550  | 16911567  | CUBN                                      | 0.035182 | 1.07E-06 | 1        | 1 | 1        | 0.016575 | 1        | 1        | 1        | 1        | 1        | 1         | 0.252991  | 1        | 5.61E-06 |          |
| 9  | 79852893  | 79852911  | VPS13A                                    | 0.000146 | 1.01E-05 | 1        | 1 | 1        | 0.016667 | 1        | 0.020408 | 0.12     | 1        | 1        | 1         | 0.000733  | 1        | 0.097902 |          |
| 11 | 73765522  | 73765578  | CZCD3                                     | 0.056693 | 0.457971 | 1        | 1 | 1        | 0.016667 | 1        | 1        | 1        | 1        | 1        | 1         | 1         | 1        | 1        |          |
| 17 | 3493774   | 34937725  | GGMBP2                                    | 0.008608 | 0.00041  | 1        | 1 | 1        | 0.016949 | 1        | 1        | 1        | 1        | 1        | 1         | 1         | 1        | 0.04918  |          |
| 20 | 30254257  | 30254300  | FKBP2                                     | 1.95E-06 | 0.025701 | 0.086957 | 1 | 1        | 1        | 0.017094 | 1        | 1        | 1        | 1        | 1         | 0.152286  | 1        | 0.07462  |          |
| 2  | 8917110   | 8917121   | KIDINS20                                  | 1.55E-05 | 2.15E-05 | 1        | 1 | 1        | 0.017241 | 1        | 1        | 0.035714 | 1        | 1        | 0.000231  | 1         | 0.003126 |          |          |
| 1  | 176012466 | 176012478 | RIFWD2                                    | 1.17E-11 | 4.03E-13 | 0.071429 | 1 | 1        | 0.017241 | 0.004292 | 0.019608 | 1        | 1        | 0.000427 | 0.000605  | 0.009764  | 1        | 1        |          |
| 15 | 157046584 | 157046595 | UBE3C                                     | 2.28E-05 | 0.000899 | 1        | 1 | 1        | 0.017391 | 1        | 1        | 0.035088 | 1        | 9.29E-09 | 0.039474  | 0.048773  | 1        | 1        |          |
| 2  | 233392012 | 233392045 | CHRD                                      | 0.002423 | 3.54E-05 | 1        | 1 | 1        | 0.017621 | 1        | 0.016129 | 1        | 1        | 0.004161 | 1         | 1         | 1        | 0.053254 |          |
| 12 | 101598350 | 101598362 | SCLS48                                    | 3.95E-08 | 3.3E-13  | 1        | 1 | 1        | 0.017964 | 1        | 1        | 0.007843 | 0.014925 | 1        | 0.85E-08  | 1         | 0.000379 |          |          |
| 4  | 89772341  | 89772364  | FAM13A                                    | 0.004932 | 5.47E-06 | 1        | 1 | 1        | 0.018018 | 1        | 0.003086 | 1        | 1        | 0.005479 | 1         | 1         | 1        | 0.083969 |          |
| 6  | 26501598  | 26501613  | CHD3                                      | 0.001323 | 1.65E-06 | 1        | 1 | 1        | 0.018018 | 1        | 1        | 1        | 1        | 1        | 0.000496  | 0.000496  | 0.096154 | 1        |          |
| 14 | 130425540 | 130425551 | L3MBTL3                                   | 1.18E-06 | 5.76E-13 | 1        | 1 | 1        | 0.018519 | 1        | 1        | 0.045455 | 1        | 9.82E-07 | 0.044118  | 0.198247  | 1        | 1        |          |
| 22 | 35661543  | 35661561  | HMGXB4                                    | 0.358974 | 0.00885  | 1        | 1 | 1        | 0.018605 | 1        | 1        | 1        | 1        | 1        | 0.185185  | 1         | 0.059761 | 1        |          |
| X  | 70608756  | 70608784  | BCRNL1                                    | 4.44E-07 | 6.33E-09 | 1        | 1 | 1        | 0.018605 | 1        | 1        | 1        | 1        | 1        | 1         | 1         | 1        | 1        |          |
| 1  | 183481943 | 183481964 | SMG7                                      | 3.25E-09 | 1.35E-07 | 0.075    | 1 | 1        | 0.01875  | 1        | 0.012048 | 1        | 0.024096 | 1        | 1         | 1         | 1        | 0.000825 |          |
| X  | 15443970  | 15443993  | PIR-FIGF                                  | 4.8E-05  | 0.085348 | 0.080782 | 1 | 1        | 0.018868 | 1        | 0.034483 | 1        | 1        | 0.005188 | 1         | 1         | 1        | 0.068878 |          |
| 3  | 119190999 | 11919113  | POGLIP1                                   | 5.98E-12 | 1.95E-08 | 1        | 1 | 1        | 0.019048 | 1        | 0.038213 | 1        | 1        | 1        | 0.002046  | 1         | 1        | 0.150733 |          |
| 7  | 74092163  | 74092183  | LOC101928943                              | 0.000139 | 0.000849 | 1        | 1 | 1        | 0.019048 | 1        | 0.138961 | 1        | 1        | 1        | 1         | 1         | 1        | 1        |          |
| 14 | 56107823  | 56107834  | KTNL                                      | 0.020443 | 0.061869 | 1        | 1 | 1        | 0.019231 | 1        | 1        | 1        | 1        | 1        | 0.031818  | 1         | 1        | 1        |          |
| 1  | 161293492 | 161293504 | SDHC                                      | 0.000117 | 4.37E-08 | 1        | 1 | 1        | 0.020134 | 1        | 1        | 1        | 1        | 1        | 1         | 1         | 1        | 0.060914 |          |
| 7  | 26251417  | 26251429  | CBX3                                      | 3.85E-11 | 2.18E-10 | 1        | 1 | 1        | 0.020134 | 1        | 1        | 1        | 1        | 1        | 1         | 1         | 1        | 0.06383  |          |
| 5  | 14607339  | 14607351  | FAM105A                                   | 5.33E-12 | 1.77E-08 | 0.076797 | 1 | 1        | 0.021097 | 1        | 1        | 0.014286 | 1        | 1        | 0.000139  | 1         | 0.05679  |          |          |
| 21 | 34882121  | 34882132  | GART                                      | 2.91E-05 | 8.14E-11 | 1        | 1 | 1        | 0.021127 | 1        | 1        | 1        | 1        | 1        | 0.000261  | 1         | 1        | 0.215384 |          |
| 12 | 116481759 | 116481873 | MED13L                                    | 0.001332 | 0.001811 | 1        | 1 | 1        | 0.021739 | 1        | 1        | 1        | 1        | 1        | 0.004919  | 1         | 1        | 1        |          |
| 11 | 41000421  | 41000437  | CEP350                                    | 2.08E-07 | 1.01E-07 | 0.107448 | 1 | 1        | 0.021739 | 1        | 0.010101 | 1        | 1        | 1        | 1         | 1         | 1        | 0.064246 |          |
| 6  | 647896    | 647907    | CEP72                                     | 0.000852 | 3.28E-10 | 0.055556 | 1 | 1        | 0.022727 | 1        | 1        | 1        | 9.47E-10 | 1        | 1         | 1         | 0.042735 |          |          |
| 9  | 103035114 | 103035125 | INVS                                      | 0.015468 | 1.18E-07 | 1        | 1 | 1        | 0.022727 | 1        | 1        | 0.020408 | 1        | 1        | 0.196563  | 0.047619  | 1        | 1        |          |
| 4  | 119644815 | 119644826 | SEC24D                                    | 1.83E-05 | 3.36E-07 | 0.179402 | 1 | 1        | 0.022727 | 1        | 1        | 1        | 1        | 0.000114 | 0.113384  | 0.393738  | 1        | 1        |          |
| 8  | 23292044  | 23292067  | ENTPD4                                    | 0.007071 | 0.000157 | 1        | 1 | 1        | 0.022901 | 1        | 1        | 1        | 0.388889 | 0.042505 | 1         | 0.020399  | 1        | 1        |          |
| 15 | 56720549  | 56720560  | TEX9                                      | 3.57E-06 | 1.99E-07 | 0.083333 | 1 | 0.058824 | 0.023077 | 1        | 1        | 1        | 1        | 1        | 1         | 1         | 1        | 0.001809 |          |
| 17 | 74625858  | 74625883  | STGALNAC1                                 | 1.010187 | 0.060066 | 1        | 1 | 1        | 0.023077 | 0.010417 | 1        | 1        | 1        | 1        | 0.000275  | 1         | 1        | 1        |          |
| 6  | 51492344  | 51492353  | PRK3                                      | 6.69E-06 | 3.49E-06 | 1        | 1 | 0.105283 | 1        | 0.034368 | 1        | 1        | 1        | 1        | 1         | 1         | 1        | 0.133178 |          |
| 1  | 210414859 | 210414894 | SEPTAD4                                   | 0.000549 | 2.45E-06 | 0.128422 | 1 | 1        | 0.023999 | 1        | 0.014388 | 0.205044 | 1        | 0.291667 | 1         | 1         | 1        | 1        |          |
| 2  | 27592090  | 27592102  | EIF2B4                                    | 3.1E-10  | 9.09E-12 | 1        | 1 | 0.079365 | 0.069424 | 0.024038 | 1        | 1        | 1        | 0.096774 | 1         | 1         | 1        | 1        |          |
| 6  | 167944013 | 167944039 | RARS                                      | 1.57E-05 | 1.52E-05 | 0.113384 | 1 | 1        | 0.02439  | 1        | 1        | 1        | 1        | 1        | 0.009489  | 1         | 0.064426 |          |          |
| 12 | 124172760 | 124172799 | TCTN2                                     | 5.31E-05 | 7.26E-07 | 1        | 1 | 1        | 0.024752 | 1        | 1        | 1        | 1        | 1        | 1         | 1         | 1        | 1        |          |
| 18 | 44682613  | 44682624  | HERP1P1                                   | 0.043697 | 0.002228 | 1        | 1 | 1        | 0.024845 | 1        | 1        | 1        | 1        | 1        | 0.010835  | 1         | 0.090909 |          |          |
| 22 | 35692622  | 35692627  | HMGXB4                                    | 2.14E-08 | 7.01E-06 | 0.065217 | 1 | 1        | 0.025    | 1        | 1        | 0.037037 | 1        | 1        | 1         | 1         | 1        | 0.046875 |          |
| 22 | 26173883  | 26173893  | SMO5B                                     | 0.000189 | 0.000869 | 0.058824 | 1 | 0.290559 | 0.051606 | 0.025424 | 1        | 0.086207 | 0.285714 | 0.039474 | 0.281263  | 0.003825  | 1        | 1        |          |
| 8  | 90796367  | 90796393  | RIPK2                                     | 0.001010 | 1.09E-05 | 1        | 1 | 1        | 0.026136 | 1        | 1        | 0.025974 | 1        | 1        | 5.18E-12  | 1         | 1        | 1        |          |
| 17 | 78263391  | 78263408  | RNF213                                    | 0.000509 | 1.1E-06  | 1        | 1 | 1        | 0.027778 | 1        | 1        | 1        | 0.206897 | 3.08E-06 | 1         | 0.208208  | 1        | 1        |          |
| 12 | 122737314 | 122737337 | HSF2                                      | 6.55E-06 | 0.004233 | 1        | 1 | 0.12049  | 0.028169 | 1        | 1        | 1        | 0.039969 | 1        | 0.038184  | 1         | 1        |          |          |
| 10 | 25883344  | 25883370  | GRP15B                                    | 1.54E-09 | 3.28E-09 | 0.054054 | 1 | 1        | 0.028249 | 1        | 1        | 1        | 1        | 1        | 0.000136  | 1         | 0.015906 |          |          |
| 15 | 64972760  | 64972789  | ZNF609                                    | 7.92E-07 | 1.95E-11 | 0.163306 | 1 | 1        | 0.02941  | 1        | 1        | 1        | 1        | 1        | 0.004552  | 1         | 0.089465 |          |          |
| 7  | 70131320  | 70131332  | SNRPB27                                   | 2.92E-09 | 7.04E-12 | 0.229809 | 1 | 1        | 0.029851 | 1        | 0.051282 | 1        | 1        | 4.24E-16 | 1         | 0.017215  | 1        | 1        |          |
| 19 | 23455450  | 23455459  | ZNF91                                     | 2.1E-09  | 2.70E-08 | 1        | 1 | 1        | 0.029961 | 1        | 0.008621 | 1        | 1        | 1        | 1         | 1         | 1        | 0.021667 |          |
| 8  | 95182984  | 95182995  | CHD17                                     | 0.002817 | 1.48E-09 | 1        | 1 | 1        | 0.031428 | 1        | 1        | 1        | 1        | 1        | 0.029851  | 1         | 1        | 1        |          |
| 14 | 57113890  | 57113916  | TMEM260                                   | 0.003035 | 3.23E-12 | 0.121212 | 1 | 1        | 0.03125  | 1        | 0.016129 | 1        | 1        | 1        | 2.28E-05  | 1         | 1        | 1        |          |
| 2  | 170127380 | 170127401 | LRP2                                      | 1.12E-05 | 0.001394 | 0.074074 | 1 | 1        | 0.031577 | 1        | 0.030928 | 1        | 1        | 0.444444 | 8.17E-08  | 1         | 1        | 1        |          |
| 1  | 215345245 | 215345313 | CKN2C                                     | 0.002313 | 0.275528 | 1        | 1 | 1        | 0.032258 | 1        | 1        | 1        | 0.058824 | 0.000817 | 1         | 0.000499  | 1        | 1        |          |
| 7  | 55004033  | 55004044  | LOC10096654(dist=131377).EGFR(dist=82681) | 2.21E-06 | 8.1E-05  | 1        | 1 | 1        | 0.033058 | 1        | 1        | 1        | 1        | 1        | 0.501E-05 | 1         | 1        | 0.084034 |          |
| 8  | 6756875   | 6756886   | DFBP1(dist=21346).DFEAF(dist=25330)       | 0.017138 | 1.59E-10 | 0.166667 | 1 | 0.166355 | 0.033968 | 1        | 0.070588 | 0.029851 | 1        | 0.005445 | 1         | 1         | 1        | 0.05     |          |
| 1  | 167382399 | 167382426 | POU2F1                                    | 0.155327 | 0.117454 | 1        | 1 | 0.366271 | 0.288054 | 0.034089 | 1        | 0.048487 | 1        | 1        | 0.0001828 | 1         | 0.031495 |          |          |
| 9  | 50881326  | 50881326  | POU2F1                                    | 0.000188 | 3.19E-06 | 1        | 1 | 1        | 0.034368 | 1        | 1        | 1        | 1        | 1        | 1         | 1         | 1        | 0.000275 |          |
| 5  | 137451365 | 137451372 | NMES2                                     | 4.2E-05  | 2.45E-08 | 1        | 1 | 1        | 0.036233 |          |          |          |          |          |           |           |          |          |          |

|    |           |           |                      |          |          |          |          |          |          |          |         |   |   |          |          |          |          |          |          |          |          |   |
|----|-----------|-----------|----------------------|----------|----------|----------|----------|----------|----------|----------|---------|---|---|----------|----------|----------|----------|----------|----------|----------|----------|---|
| 7  | 27147451  | 27147501  | HOKA3                | 0.030779 | 6.28E-09 | 0.090909 | 1        | 1        | 1        | 1        | 1       | 1 | 1 | 1        | 1.16E-07 | 0.037383 | 0.026087 |          |          |          |          |   |
| 10 | 81053094  | 81053105  | ZM21                 | 0.05745  | 0.000124 | 1        | 1        | 1        | 1        | 0.053182 | 1       | 1 | 1 | 1        | 1        | 0.008645 | 1        | 1        |          |          |          |   |
| 12 | 105464316 | 105464302 | ALPH112              | 0.000134 | 4.3E-05  | 1        | 1        | 0.058824 | 1        | 1        | 0.00051 | 1 | 1 | 1        | 1        | 0.000132 | 1        | 0.004709 |          |          |          |   |
| 11 | 108119515 | 108119628 | TKA1                 | 0.01925  | 1        | 1        | 1        | 1        | 1        | 1        | 1       | 1 | 1 | 1        | 1        | 1        | 1        | 0.030537 |          |          |          |   |
| 3  | 135806702 | 135806713 | PPP2R3A              | 0.000227 | 1.8E-12  | 0.046512 | 1        | 1        | 1        | 1        | 1       | 1 | 1 | 0.072727 | 0.000887 | 1        | 3.51E-10 | 0.046514 |          |          |          |   |
| 9  | 5753518   | 5753530   | RIC1                 | 4E-05    | 3.28E-11 | 0.04878  | 1        | 1        | 1        | 1        | 1       | 1 | 1 | 1        | 0.01     | 1        | 1.84E-12 | 0.038989 | 0.087719 |          |          |   |
| 4  | 65180308  | 65180357  | TECRL                | 0.004395 | 1        | 1        | 1        | 0.264991 | 1        | 1        | 1       | 1 | 1 | 1        | 1        | 0.000877 | 0.000284 | 1        | 0.028468 |          |          |   |
| 16 | 258007    | 258018    | LCU7L                | 2.59E-06 | 2.09E-07 | 0.229809 | 1        | 1        | 1        | 1        | 1       | 1 | 1 | 1        | 0.025974 | 1        | 0.005067 | 1        | 0.086294 |          |          |   |
| 9  | 45823034  | 45823067  | CKM1                 | 2.19E-06 | 1.36E-05 | 1        | 1        | 1        | 1        | 1        | 1       | 1 | 1 | 1        | 0.047619 | 1        | 1        | 0.000841 | 1        | 0.067606 |          |   |
| 3  | 100492722 | 100432699 | IFG                  | 0.011729 | 1        | 1        | 1        | 0.065421 | 1        | 1        | 1       | 1 | 1 | 1        | 1        | 1        | 1        | 0.222222 | 1        | 1        |          |   |
| 17 | 48066132  | 4826117   | TKA1A                | 0.000402 | 0.007764 | 1        | 1        | 1        | 1        | 1        | 1       | 1 | 1 | 1        | 0.009307 | 1        | 1        | 0.00111  | 1        | 0.32003  |          |   |
| 7  | 158935023 | 158935043 | WPR2                 | 6.05E-05 | 1.01E-08 | 1        | 1        | 1        | 1        | 1        | 1       | 1 | 1 | 1        | 1        | 0.105263 | 2.98E-11 | 1        | 0.070025 |          |          |   |
| 11 | 128354631 | 128354658 | ETS1                 | 0.000291 | 0.038168 | 1        | 1        | 1        | 1        | 1        | 1       | 1 | 1 | 1        | 0.010638 | 0.037037 | 1        | 1        | 0.593144 | 1        | 1        |   |
| 2  | 165971883 | 165971895 | SCN3A                | 1.51E-08 | 2.48E-08 | 1        | 1        | 1        | 1        | 1        | 1       | 1 | 1 | 1        | 1        | 0.016949 | 1        | 1.01E-10 | 1        | 0.001159 |          |   |
| 10 | 18828669  | 18828689  | CACNB2               | 0.000127 | 1.38E-11 | 1        | 1        | 1        | 1        | 1        | 1       | 1 | 1 | 1        | 1        | 0.052281 | 1        | 2.52E-08 | 1        | 1        |          |   |
| 10 | 70520707  | 70520747  | CCAR1                | 8.24E-07 | 8.25E-10 | 1        | 1        | 1        | 1        | 1        | 1       | 1 | 1 | 1        | 1        | 1        | 5.78E-09 | 0.010753 | 0.003139 | 1        | 1        |   |
| 11 | 3789982   | 3790022   | NUP98                | 0.000491 | 0.001803 | 1        | 1        | 1        | 1        | 1        | 1       | 1 | 1 | 1        | 1        | 0.068966 | 1        | 0.031991 | 0.012021 | 0.359865 |          |   |
| 16 | 21396850  | 21396873  | SNK29P1              | 5.24E-07 | 3.30E-07 | 0.106383 | 1        | 1        | 1        | 1        | 1       | 1 | 1 | 1        | 1        | 1        | 2.1E-21  | 1        | 1        | 1        | 1        |   |
| 19 | 52469526  | 52469535  | ZNF350-AS1           | 7.85E-05 | 0.000107 | 0.218732 | 1        | 1        | 1        | 1        | 1       | 1 | 1 | 1        | 0.025    | 1        | 1        | 1        | 1        | 0.040198 |          |   |
| 4  | 151835239 | 151835258 | LRBA                 | 4.47E-12 | 7.33E-11 | 0.054054 | 1        | 1        | 1        | 1        | 1       | 1 | 1 | 1        | 0.043791 | 0.045113 | 1        | 7.32E-09 | 1        | 0.100405 |          |   |
| 3  | 197562495 | 197562534 | LRCH3                | 0.150456 | 0.004767 | 1        | 1        | 1        | 1        | 1        | 1       | 1 | 1 | 1        | 1        | 1        | 1        | 0.198198 | 1        | 1        |          |   |
| 4  | 142153856 | 142153880 | ZNF330               | 9.61E-08 | 7.45E-08 | 0.124884 | 1        | 1        | 1        | 1        | 1       | 1 | 1 | 1        | 1        | 1        | 7.78E-20 | 1        | 0.12163  |          |          |   |
| 10 | 70696596  | 70696633  | DDX50                | 1.24E-08 | 0.003657 | 1        | 1        | 1        | 1        | 1        | 1       | 1 | 1 | 1        | 1        | 1        | 8.38E-06 | 1        | 0.01865  |          |          |   |
| 3  | 40503070  | 40503094  | RPL14                | 1.1E-07  | 5.35E-06 | 1        | 1        | 1        | 1        | 1        | 1       | 1 | 1 | 1        | 1        | 1        | 1        | 3.68E-07 | 1        | 0.130261 |          |   |
| 11 | 113323406 | 113323417 | CSMD3                | 5.4E-08  | 1.79E-11 | 0.139373 | 1        | 0.090909 | 1        | 1        | 1       | 1 | 1 | 1        | 1        | 1        | 1        | 0.000687 | 1        | 0.039454 |          |   |
| 1  | 101440341 | 101440349 | CDK4                 | 0.000448 | 3.21E-06 | 1        | 1        | 1        | 1        | 1        | 1       | 1 | 1 | 1        | 0.017544 | 1        | 1        | 9.31E-09 | 1        | 0.096586 |          |   |
| 19 | 6176498   | 6176523   | CSBG2                | 0.34241  | 0.379035 | 1        | 1        | 1        | 1        | 1        | 1       | 1 | 1 | 1        | 1        | 1        | 1        | 0.065223 | 1        | 1        |          |   |
| 7  | 129680648 | 129680677 | ZC3HC1               | 6.5E-10  | 7.15E-07 | 0.045455 | 1        | 1        | 1        | 1        | 1       | 1 | 1 | 1        | 0.050413 | 0.021739 | 0.001207 | 1        | 0.012217 | 0.075068 | 0.322309 |   |
| 2  | 162279850 | 162279867 | TBR1                 | 1        | 3.26E-05 | 1        | 1        | 1        | 1        | 0.081933 | 1       | 1 | 1 | 1        | 1        | 1        | 1        | 0.069354 | 1        | 1        | 1        | 1 |
| 7  | 73829294  | 73829305  | ALMS1                | 0.003348 | 2.64E-05 | 1        | 1        | 1        | 1        | 1        | 1       | 1 | 1 | 1        | 1        | 1        | 1        | 0.013294 | 1        | 1        | 1        | 1 |
| 7  | 121012196 | 121012208 | FAM3C                | 4.06E-05 | 2.25E-07 | 0.055556 | 1        | 1        | 1        | 1        | 1       | 1 | 1 | 1        | 1        | 1        | 1        | 2.24E-12 | 1        | 1        | 1        | 1 |
| 16 | 151779420 | 151779459 | C6orf211             | 0.347518 | 0.026759 | 1        | 1        | 1        | 1        | 1        | 1       | 1 | 1 | 1        | 1        | 0.25     | 0.069355 | 1        | 1        | 1        | 1        |   |
| 17 | 60865741  | 60865805  | SNR11                | 0.073369 | 1        | 1        | 1        | 1        | 1        | 1        | 1       | 1 | 1 | 1        | 1        | 1        | 1        | 0.152671 | 1        | 1        | 1        | 1 |
| 9  | 35107316  | 35107350  | FAM214B              | 1        | 1        | 1        | 1        | 1        | 1        | 1        | 1       | 1 | 1 | 1        | 1        | 1        | 1        | 0.000967 | 1        | 1        | 1        | 1 |
| 2  | 61456592  | 61456645  | USP34                | 0.000219 | 0.038026 | 1        | 1        | 1        | 1        | 1        | 1       | 1 | 1 | 1        | 1        | 1        | 1        | 0.547485 | 1        | 0.00014  | 1        | 1 |
| 16 | 71772784  | 71772795  | API61                | 7.4E-07  | 3.16E-12 | 1        | 1        | 1        | 0.059837 | 1        | 1       | 1 | 1 | 1        | 1        | 1        | 1        | 2.69E-06 | 1        | 1        | 1        | 1 |
| 17 | 26911647  | 26911664  | SPAG5                | 7.45E-05 | 0.000642 | 0.055556 | 1        | 1        | 1        | 1        | 1       | 1 | 1 | 1        | 1        | 1        | 1        | 6.22E-08 | 1        | 0.019591 | 1        | 1 |
| 9  | 58120318  | 58120335  | FLNB                 | 0.070204 | 0.003261 | 0.052632 | 1        | 1        | 1        | 1        | 1       | 1 | 1 | 1        | 1        | 0.072027 | 1        | 0.000145 | 0.028169 | 1        | 1        |   |
| 12 | 22605994  | 22606268  | ABC9                 | 0.000407 | 0.000161 | 1        | 1        | 1        | 1        | 1        | 1       | 1 | 1 | 1        | 0.008772 | 1        | 1        | 0.176471 | 1        | 0.01795  | 1        | 1 |
| 12 | 165950662 | 165950691 | C6orf11              | 0.000011 | 0.203583 | 1        | 1        | 1        | 1        | 1        | 1       | 1 | 1 | 1        | 1        | 1        | 1        | 0.000126 | 0.039216 | 1        | 1        | 1 |
| 7  | 7575506   | 7575518   | CDK1                 | 7.85E-08 | 4.03E-13 | 0.120192 | 1        | 0.067797 | 1        | 1        | 1       | 1 | 1 | 1        | 0.015038 | 1        | 1        | 6.86E-10 | 1        | 0.070923 | 1        | 1 |
| 7  | 103557648 | 103557659 | RELN                 | 5.84E-05 | 1.04E-05 | 1        | 1        | 1        | 1        | 1        | 1       | 1 | 1 | 1        | 1        | 0.153627 | 1        | 1        | 5.84E-06 | 1        | 0.095238 |   |
| 1  | 232564096 | 232564118 | SIPAL1               | 5.12E-07 | 0.005921 | 0.058824 | 1        | 0.074074 | 1        | 1        | 1       | 1 | 1 | 1        | 1        | 1        | 1        | 8.77E-18 | 1        | 0.045404 | 1        | 1 |
| 1  | 35879555  | 35879566  | ZMYM4                | 0.00077  | 0.001269 | 1        | 1        | 1        | 1        | 1        | 1       | 1 | 1 | 1        | 1        | 1        | 1        | 2.58E-06 | 1        | 0.236113 | 1        | 1 |
| 17 | 9503559   | 9503577   | FCFAS2               | 1.01E-05 | 1.72E-11 | 1        | 1        | 1        | 1        | 1        | 1       | 1 | 1 | 1        | 0.079545 | 1        | 1        | 2.2E-05  | 1        | 1        | 1        | 1 |
| 4  | 178274919 | 178274938 | NEI3                 | 1.93E-10 | 1.71E-05 | 0.016728 | 1        | 1        | 1        | 1        | 1       | 1 | 1 | 1        | 0.013699 | 1        | 1        | 6.84E-20 | 1        | 0.000975 | 1        | 1 |
| 4  | 28998815  | 28998831  | HMC                  | 9.03E-06 | 0.009737 | 0.1      | 0.071429 | 1        | 1        | 1        | 1       | 1 | 1 | 1        | 1        | 1        | 1        | 0.000126 | 0.084472 | 1        | 0.075622 | 1 |
| 1  | 21175505  | 21175586  | EIF4G3               | 4.02E-05 | 3.81E-08 | 1        | 1        | 1        | 1        | 1        | 1       | 1 | 1 | 1        | 1        | 1        | 1        | 5.35E-06 | 1        | 0.012288 | 1        | 1 |
| 9  | 103275649 | 103275693 | MSANTO3-TMFF1L,TMFF1 | 0.000217 | 0.050388 | 0.056338 | 1        | 1        | 1        | 1        | 1       | 1 | 1 | 1        | 1        | 1        | 1        | 0.000112 | 1        | 1        | 1        | 1 |
| 12 | 149583372 | 149583428 | SLC6A7               | 0.001123 | 1        | 1        | 1        | 1        | 1        | 1        | 1       | 1 | 1 | 1        | 1        | 0.076923 | 0.263158 | 0.009162 | 1        | 1        | 1        | 1 |
| 10 | 28908452  | 28908478  | WAC                  | 6.97E-05 | 4.1E-09  | 1        | 1        | 1        | 1        | 1        | 1       | 1 | 1 | 1        | 0.029412 | 1        | 4.3E-11  | 0.000974 | 0.100073 | 1        | 1        |   |
| 7  | 77424267  | 77424278  | OSTF1                | 0.006391 | 6.27E-06 | 1        | 1        | 1        | 1        | 1        | 1       | 1 | 1 | 1        | 1        | 1        | 1        | 0.003401 | 1        | 0.138122 | 1        | 1 |
| 13 | 76134860  | 76134871  | UCHL3                | 0.000402 | 6.79E-05 | 0.051282 | 1        | 1        | 1        | 1        | 1       | 1 | 1 | 1        | 1        | 0.001488 | 1        | 0.000833 | 0.000452 | 0.115561 | 1        | 1 |
| 4  | 58277765  | 58277777  | TMM1465              | 4.41E-05 | 1.03E-06 | 1        | 1        | 1        | 1        | 0.005376 | 1       | 1 | 1 | 1        | 1        | 0.042105 | 1        | 0.000126 | 1        | 0.069182 | 1        | 1 |
| 2  | 228401293 | 22840135  | ARGF1                | 0.001015 | 1.86E-05 | 1        | 1        | 1        | 1        | 1        | 1       | 1 | 1 | 1        | 1        | 1        | 1        | 5.35E-06 | 1        | 1        | 1        | 1 |
| 17 | 17725851  | 17725896  | SREBF1               | 0.001811 | 0.002085 | 1        | 1        | 0.069444 | 1        | 0.09472  | 1       | 1 | 1 | 1        | 1        | 1        | 1        | 0.000772 | 1        | 1        | 1        | 1 |
| 8  | 55050032  | 55050043  | MRLP15               | 4.21E-08 | 1.1E-08  | 1        | 1        | 1        | 1        | 1        | 1       | 1 | 1 | 1        | 1        | 1        | 1        | 3.7E-18  | 1        | 0.054852 | 1        | 1 |
| 9  | 5073681   | 5073692   | IAK2                 | 2.1E-06  | 7.2E-13  | 1        | 1        | 1        | 1        | 1        | 1       | 1 | 1 | 1        | 0.069549 | 1        | 1        | 2.03E-05 | 1        | 0.012783 | 1        | 1 |
| 5  | 36995692  | 36995703  | NPBL                 | 0.02125  | 3.62E-05 | 1        | 1        | 1        | 1        | 1        | 1       | 1 | 1 | 1        | 1        | 1        | 1        | 0.020792 | 0.022727 | 1        | 1        | 1 |
| 7  | 73467650  | 73467689  | ELN                  | 0.000567 | 1        | 0.088355 | 1        | 1        | 1        | 1        | 1       | 1 | 1 | 1        | 1        | 1        | 1        | 0.038994 | 1        | 0.080563 | 1        | 1 |
| 5  | 64933457  | 64933472  | TRAPP1C3             | 9.38E-06 | 0.60344  | 0.144731 | 1        | 1        | 1        | 1        | 1       | 1 | 1 | 1        | 1        | 1        | 1        | 6.96E-09 | 1        | 0.119059 | 1        | 1 |
| 6  | 13839216  | 13839215  | TPRK                 | 2.38E-11 | 3.83E-10 | 1        | 1        | 1        | 0.137397 | 1        | 1       | 1 | 1 | 1        | 0.089127 | 0.032787 | 1        | 2.17E-08 | 0.071408 | 1        | 0.05945  | 1 |
| 2  | 202626550 | 202626577 | ALS2                 | 0.011153 | 0.000141 | 1        | 1        | 1        | 1        | 1        | 1       | 1 | 1 | 1        | 0.022472 | 1        | 1        | 0.007746 | 1        | 0.133733 | 1        | 1 |
| 6  | 170115957 | 170115968 | PHF10                | 2.97E-05 | 6.51E-09 | 1        | 1        | 1        | 1        | 1        | 1       | 1 | 1 | 1        | 1        | 1        | 1        | 2.54E-10 | 1        | 0.141116 | 1        | 1 |
| X  | 122805622 | 122805633 | THOC2                | 1.38E-05 | 2.95E-10 | 1        | 1        | 0.227273 | 1        | 1        | 1       | 1 | 1 | 1        | 0.104167 | 1        | 1        | 2.92E-13 | 0.046875 | 0.018634 | 1        | 1 |
| 12 | 116549320 | 116549361 | MED13L               | 1.8E-05  | 1.01E-06 | 1        | 1        | 1        | 1        | 1        | 1       | 1 | 1 | 1        | 1        | 1        | 1        | 0.003767 | 1        | 0.011294 | 1        | 1 |
| 6  | 11192516  | 111       |                      |          |          |          |          |          |          |          |         |   |   |          |          |          |          |          |          |          |          |   |

|    |           |           |                                               |          |          |          |          |          |          |          |          |          |          |          |          |          |          |          |          |          |   |
|----|-----------|-----------|-----------------------------------------------|----------|----------|----------|----------|----------|----------|----------|----------|----------|----------|----------|----------|----------|----------|----------|----------|----------|---|
| 5  | 56231347  | 56231384  | MIR3                                          | 9.17E-05 | 1.06E-08 | 1        | 1        | 1        | 1        | 1        | 1        | 1        | 1        | 1        | 1        | 1        | 1        | 0.001803 | 0.070779 | 0.058824 |   |
| 3  | 10076842  | 10076830  | CCDC67                                        | 0.000346 | 2.17E-10 | 0.090909 | 1        | 0.53039  | 1        | 0.163288 | 1        | 1        | 1        | 1        | 1        | 1        | 0.006105 | 0.00058  | 0.609632 |          |   |
| 4  | 81121301  | 81123039  | PRDM8                                         | 1        | 1        | 1        | 0.240404 | 1        | 1        | 1        | 1        | 1        | 1        | 1        | 1        | 1        | 1        | 0.003215 | 0.038462 | 0.090275 |   |
| 3  | 64184677  | 64184657  | ORX1L2-AS3                                    | 1.61E-10 | 0.000202 | 0.069767 | 1        | 0.095582 | 1        | 1        | 1        | 1        | 1        | 1        | 1        | 1        | 1        | 0.000202 | 0.000202 | 0.034844 |   |
| 5  | 96314793  | 96314804  | INPEP                                         | 7.64E-09 | 3.74E-13 | 1        | 1        | 1        | 1        | 1        | 1        | 1        | 1        | 0.036364 | 1        | 1        | 1        | 4.55E-05 | 0.000872 | 0.008527 |   |
| X  | 106109272 | 106109294 | TBC1D8B                                       | 4.02E-07 | 5.71E-05 | 0.053571 | 1        | 1        | 1        | 1        | 1        | 1        | 1        | 1        | 1        | 1        | 1        | 3.43E-05 | 1        | 0.126681 |   |
| 7  | 134264233 | 134264254 | AKR1B15                                       | 1.39E-08 | 0.00035  | 0.171047 | 1        | 0.238138 | 1        | 1        | 1        | 1        | 1        | 1        | 1        | 1        | 1        | 5.26E-06 | 0.079184 | 0.340406 |   |
| 15 | 41663884  | 41663900  | MUSAP1                                        | 1.83E-10 | 6.27E-12 | 1        | 1        | 0.190952 | 1        | 1        | 1        | 1        | 1        | 1        | 1        | 0.012987 | 1        | 3.82E-20 | 0.002387 | 0.010325 |   |
| 19 | 15648108  | 15648133  | CYP4F22                                       | 0.004423 | 0.208209 | 1        | 1        | 1        | 1        | 1        | 1        | 1        | 1        | 0.096154 | 1        | 1        | 1        | 0.000188 | 1        | 0.007139 |   |
| 11 | 93170895  | 93170938  | CCDC67                                        | 0.000919 | 0.030896 | 0.109015 | 1        | 1        | 1        | 1        | 1        | 1        | 1        | 1        | 1        | 1        | 0.184211 | 9.4E-06  | 0.057681 |          |   |
| 11 | 17534407  | 17534451  | NSD1 (dist=6479),DCBLD1 (dist=50309)          | 7.04E-07 | 7.61E-08 | 1        | 1        | 0.313852 | 0.071038 | 1        | 0.014218 | 1        | 0.047606 | 1        | 0.0625   | 1        | 1        | 6.15E-05 | 1        | 0.033923 |   |
| 2  | 23242528  | 23242550  | ALPAP                                         | 0.06397  | 1        | 1        | 1        | 1        | 1        | 1        | 1        | 1        | 1        | 1        | 1        | 1        | 1        | 0.330601 | 0.03125  | 1        |   |
| 19 | 6466368   | 6466409   | CRB3                                          | 0.432432 | 0.210526 | 1        | 1        | 1        | 1        | 1        | 1        | 1        | 1        | 1        | 1        | 1        | 1        | 1        | 1        | 1        |   |
| 3  | 100009610 | 100009621 | TBC1D23                                       | 0.00116  | 4.09E-10 | 1        | 1        | 1        | 1        | 1        | 1        | 1        | 0.063492 | 1        | 1        | 1        | 1        | 5.86E-07 | 1        | 1        |   |
| 12 | 55820958  | 55820971  | ORC67C                                        | 2.96E-06 | 1.07E-09 | 0.263306 | 1        | 0.425032 | 1        | 0.063275 | 0.011236 | 1        | 1        | 1        | 1        | 1        | 1        | 0.00013  | 1        | 0.063081 |   |
| 8  | 104930646 | 104930658 | RIMS2                                         | 5.1E-06  | 3.85E-11 | 0.066102 | 1        | 0.110193 | 0.117517 | 1        | 1        | 0.006439 | 1        | 0.333333 | 9.22E-10 | 0.086957 | 0.161505 | 1        | 1        |          |   |
| 9  | 138594012 | 138594030 | KCNT1                                         | 1        | 0.000469 | 1        | 1        | 1        | 1        | 1        | 1        | 1        | 1        | 1        | 1        | 1        | 1        | 1        | 1        | 1        |   |
| 7  | 121942442 | 121942464 | ITP1                                          | 0.008511 | 2.22E-06 | 1        | 1        | 1        | 1        | 1        | 1        | 0.018182 | 1        | 1        | 1        | 1        | 1        | 0.04045  | 1        | 0.027226 |   |
| X  | 17254373  | 17254398  | SDHB                                          | 0.31884  | 0.462766 | 1        | 1        | 1        | 1        | 1        | 1        | 1        | 1        | 1        | 1        | 1        | 1        | 0.423926 | 1        | 1        |   |
| X  | 23724675  | 23724698  | ACOF9                                         | 1.89E-08 | 0.314685 | 1        | 1        | 1        | 1        | 1        | 1        | 1        | 1        | 0.079184 | 1        | 1        | 1        | 1.73E-21 | 1        | 0.405212 |   |
| 5  | 180663941 | 180663952 | GNB2L1                                        | 3.62E-06 | 0.000789 | 1        | 1        | 1        | 0.228861 | 1        | 1        | 1        | 0.203862 | 0.109091 | 0.005882 | 2E-14    | 1        | 0.018471 | 1        | 1        |   |
| 15 | 59970049  | 59970060  | BNIP2                                         | 1.53E-05 | 7.07E-10 | 1        | 1        | 1        | 1        | 1        | 1        | 1        | 0.102941 | 1        | 1        | 1        | 1        | 3.16E-10 | 1        | 0.199349 |   |
| 1  | 155737425 | 155737454 | GONAL                                         | 0.032705 | 0.020729 | 0.197031 | 1        | 0.066641 | 0.145873 | 1        | 1        | 1        | 1        | 0.002259 | 0.001231 | 1        | 1        | 0.147134 | 1        | 1        |   |
| 3  | 100016726 | 100016752 | TBC1D23                                       | 0.038268 | 0.003526 | 0.080782 | 1        | 0.130303 | 1        | 1        | 1        | 0.052632 | 1        | 0.061224 | 1        | 0.000246 | 0.001442 | 1        | 1        | 1        |   |
| 10 | 52502803  | 52502820  | ASAH2B                                        | 6.76E-06 | 0.003115 | 1        | 1        | 0.075924 | 1        | 0.056169 | 1        | 1        | 1        | 1        | 1        | 1        | 1        | 1.1E-05  | 1        | 0.000145 |   |
| 20 | 58153393  | 58153418  | ACTR3C                                        | 3.82E-05 | 3.71E-06 | 1        | 1        | 1        | 1        | 1        | 1        | 1        | 1        | 1        | 1        | 1        | 1        | 0.21E-06 | 1        | 0.000247 |   |
| 17 | 37580118  | 37580153  | MED1                                          | 3.91E-10 | 0.001401 | 1        | 1        | 1        | 1        | 1        | 1        | 1        | 1        | 1        | 1        | 1        | 1        | 4.28E-09 | 0.037975 | 0.004761 |   |
| 22 | 38259110  | 38259129  | E1F3L                                         | 1.48E-08 | 0.014261 | 1        | 1        | 1        | 1        | 1        | 1        | 1        | 1        | 1        | 1        | 1        | 1        | 1.39E-10 | 1        | 0.013309 |   |
| 3  | 37373976  | 37373983  | E1F2AK2                                       | 1        | 1        | 1        | 1        | 1        | 1        | 1        | 1        | 1        | 1        | 1        | 1        | 1        | 1        | 1        | 1        | 0.513293 |   |
| X  | 101804817 | 101804836 | NXF4                                          | 1.69E-11 | 0.171437 | 0.142651 | 1        | 1        | 1        | 1        | 1        | 1        | 0.039216 | 0.176471 | 6.9E-09  | 0.027397 | 0.032514 | 1        | 1        |          |   |
| 2  | 74756111  | 74756122  | AUP1                                          | 0.003739 | 1.69E-05 | 1        | 0.103841 | 1        | 1        | 1        | 1        | 0.022222 | 1        | 0.018182 | 0.009296 | 1        | 1        | 0.368144 | 1        | 1        |   |
| 1  | 235301496 | 235301530 | RBMYB                                         | 5.29E-09 | 1.56E-07 | 1        | 0.289576 | 0.055046 | 1        | 1        | 1        | 1        | 1        | 0.210526 | 9.97E-15 | 0.061538 | 0.017913 | 1        | 1        | 1        |   |
| X  | 17254373  | 17254398  | SDHB                                          | 0.60984  | 0.462766 | 1        | 1        | 1        | 1        | 1        | 1        | 1        | 1        | 1        | 1        | 1        | 1        | 0.423926 | 1        | 0.000247 |   |
| 15 | 84685118  | 84685129  | ADAMTS13                                      | 0.004356 | 2.58E-10 | 1        | 1        | 1        | 1        | 0.060592 | 1        | 1        | 1        | 1        | 1        | 1        | 1        | 0.000298 | 0.057145 | 0.296442 |   |
| 3  | 179291295 | 179291319 | ACTL6A                                        | 0.000529 | 4.3E-07  | 0.053571 | 1        | 0.487089 | 1        | 0.092728 | 1        | 1        | 1        | 0.071429 | 3.64E-07 | 1        | 1        | 1        | 1        | 1        |   |
| 5  | 38959431  | 38959442  | RICTOR                                        | 0.001362 | 0.004785 | 1        | 1        | 1        | 1        | 1        | 1        | 1        | 1        | 1        | 1        | 1        | 1        | 0.003502 | 1        | 0.107663 |   |
| 4  | 4701841   | 4701860   | CD37L1                                        | 7.36E-06 | 0.00124  | 1        | 1        | 1        | 0.077141 | 1        | 1        | 1        | 0.458353 | 0.09375  | 1        | 1        | 1        | 0.000185 | 1        | 0.527822 |   |
| 11 | 107969287 | 107969319 | CUL5                                          | 3.01E-05 | 0.004266 | 1        | 1        | 1        | 1        | 1        | 1        | 1        | 1        | 1        | 1        | 1        | 1        | 1.45E-07 | 1        | 1        |   |
| 8  | 194596    | 194607    | ZNF596                                        | 3.01E-07 | 4.47E-13 | 0.136213 | 1        | 1        | 1        | 1        | 0.010753 | 1        | 1        | 0.111111 | 3.6E-09  | 1        | 1        | 0.164912 | 1        | 1        |   |
| 11 | 17171987  | 17172017  | PKNOX1A                                       | 0.141794 | 0.136213 | 1        | 1        | 1        | 0.130435 | 1        | 1        | 1        | 0.090909 | 0.315789 | 0.010443 | 1        | 1        | 0.000247 | 1        | 1        |   |
| 11 | 124007398 | 124007486 | VWASA                                         | 0.095916 | 0.163934 | 1        | 0.080878 | 1        | 1        | 1        | 1        | 1        | 1        | 1        | 1        | 1        | 1        | 0.522747 | 1        | 0.00979  |   |
| 2  | 197762941 | 197762956 | PGAP1                                         | 2.46E-07 | 0.001578 | 0.111444 | 1        | 1        | 1        | 1        | 1        | 1        | 0.014493 | 0.017094 | 1        | 0.173913 | 1.52E-06 | 0.071984 | 1        | 1        |   |
| 2  | 38545608  | 38545626  | ATL2                                          | 6.65E-06 | 0.000395 | 1        | 1        | 1        | 1        | 1        | 1        | 1        | 1        | 1        | 1        | 1        | 1        | 8.68E-08 | 0.000974 | 1        |   |
| 6  | 39580887  | 39580898  | KIF6                                          | 0.004198 | 0.001084 | 1        | 1        | 1        | 1        | 1        | 1        | 0.009259 | 0.037037 | 1        | 1        | 0.000149 | 0.045154 | 0.082748 | 1        | 1        |   |
| 1  | 94544805  | 94544830  | ABC4A                                         | 0.000671 | 0.004908 | 0.066667 | 1        | 1        | 0.324331 | 1        | 1        | 1        | 0.022059 | 1.45E-07 | 0.027778 | 0.043316 | 1        | 1        | 1        | 1        |   |
| 12 | 14952706  | 14952735  | OR2A10                                        | 2.52E-09 | 0.006417 | 0.117647 | 1        | 1        | 1        | 1        | 1        | 1        | 1        | 0.030508 | 1        | 1        | 1        | 5.33E-10 | 1        | 0.316908 |   |
| 19 | 58361014  | 58361034  | KRCBP1 (dist=9962),LOC101927653 (dist=988708) | 3.75E-10 | 6.40E-10 | 0.083333 | 1        | 1        | 1        | 0.004348 | 1        | 0.007194 | 1        | 0.088358 | 1        | 1        | 0.001232 | 0.027778 | 0.046402 | 1        | 1 |
| 7  | 7985974   | 7985977   | TMM4A                                         | 6.25E-09 | 3.31E-10 | 1        | 1        | 1        | 1        | 0.004348 | 0.007692 | 2.86E-05 | 1        | 0.03227  | 0.052247 | 1        | 1        | 0.00015  | 1        | 0.000247 |   |
| 14 | 76173952  | 76173964  | TTL5                                          | 1.63E-11 | 1.73E-08 | 1        | 0.134618 | 1        | 1        | 0.004425 | 1        | 0.035461 | 1        | 1        | 8.15E-05 | 0.051282 | 0.000712 | 1        | 1        | 1        |   |
| 3  | 131721441 | 131721453 | NUP188                                        | 2.68E-06 | 2.93E-09 | 0.097561 | 1        | 0.114754 | 1        | 0.004587 | 0.021739 | 1        | 0.019231 | 1        | 1.46E-06 | 0.022727 | 0.067265 | 1        | 1        | 1        |   |
| 8  | 1844623   | 1844643   | ARHGAP10                                      | 0.000361 | 1.03E-09 | 1        | 1        | 1        | 0.004695 | 1        | 1        | 1        | 1        | 1        | 1        | 1        | 1        | 3.29E-05 | 1        | 0.100525 |   |
| 2  | 114210810 | 114210837 | CBWD2                                         | 3.16E-07 | 7.64E-10 | 1        | 1        | 0.051111 | 1        | 0.004739 | 0.108764 | 0.092543 | 1        | 1        | 1        | 1        | 1        | 1.58E-07 | 1        | 0.203844 |   |
| 19 | 18857939  | 18857956  | CRT1                                          | 5.21E-11 | 3.32E-05 | 1        | 1        | 1        | 0.006993 | 1        | 1        | 1        | 1        | 1        | 1        | 1        | 1        | 1        | 1        | 1        |   |
| 4  | 16689848  | 16689848  | SCN1A                                         | 0.000685 | 3.32E-11 | 1        | 1        | 1        | 1        | 0.007194 | 1        | 1        | 1        | 1        | 1        | 1        | 1        | 9.52E-06 | 0.045455 | 0.006645 |   |
| 7  | 2923213   | 2923219   | TMEM162                                       | 1.54E-05 | 2.81E-09 | 0.06     | 1        | 1        | 0.007246 | 1        | 1        | 1        | 1        | 1        | 1        | 1        | 1        | 0.0011   | 1        | 0.000247 |   |
| 18 | 14218568  | 14218580  | ANKRD20ASP                                    | 3.45E-06 | 7.9E-13  | 1        | 1        | 1        | 0.008097 | 1        | 1        | 1        | 1        | 1        | 1        | 1        | 1        | 0.025    | 1        | 1        |   |
| 21 | 37787572  | 37787585  | CHAF1B                                        | 5.43E-10 | 3.18E-06 | 1        | 0.064103 | 1        | 1        | 0.008299 | 1        | 1.52E-05 | 0.0625   | 1        | 1        | 1        | 1        | 1.72E-05 | 1        | 0.12487  |   |
| 17 | 49048274  | 49048312  | SPAG9                                         | 2.63E-07 | 0.005247 | 1        | 1        | 1        | 0.009804 | 1        | 1        | 1        | 1        | 1        | 1        | 1        | 1        | 0.026549 | 1        | 0.000965 |   |
| 19 | 12112120  | 12112142  | ZNF673 (dist=20922),ZNF433 (dist=13390)       | 3.96E-06 | 0.008564 | 1        | 1        | 1        | 0.010417 | 1        | 1        | 1        | 1        | 0.001254 | 0.033333 | 1        | 1        | 1        | 1        | 1        |   |
| 16 | 10851655  | 10851666  | NUPB1                                         | 6.24E-05 | 0.000121 | 1        | 1        | 1        | 0.011173 | 1        | 0.085714 | 0.037037 | 1        | 0.357143 | 1        | 1        | 1        | 0.000247 | 1        | 0.000537 |   |
| 1  | 74757199  | 74757231  | RNR3                                          | 4.79E-05 | 0.002186 | 0.081081 | 1        | 0.064499 | 1        | 0.011696 | 1        | 1        | 0.08599  | 1        | 0.001096 | 1        | 1        | 0.000247 | 1        | 0.000537 |   |
| 11 | 17170407  | 17170425  | NUPB1 (dist=1743),OR2A10 (dist=9286)          | 1.63E-07 | 5.66E-11 | 0.166667 | 1        | 1        | 1        | 0.01227  | 1        | 1        | 1        | 1        | 1        | 1        | 1        | 0.052323 | 1        | 0.090305 |   |
| 16 | 160157277 | 160157288 | WTAP                                          | 4.05E-06 | 3.41E-12 | 0.061224 | 1        | 1        | 0.013216 | 1        | 0.000949 | 1        | 1        | 1        | 1        | 1        | 1        | 3.62E-11 | 0.036585 | 0.061538 |   |
| 7  | 75670529  | 75670530  | KARS                                          | 0.002083 | 5.77E-05 | 1        | 1        | 1        | 0.014706 | 1        | 1        | 1        | 1        | 1        | 1        | 1        | 1        | 0.003623 | 1        | 1        |   |
| 2  | 53823175  | 53823189  | AMHR2                                         | 0.002143 | 5.05E-09 | 1        | 1        | 0.096604 | 0.016878 | 0.002193 | 0.119076 | 1        | 1        | 0.019317 | 1        | 1        | 1        | 0.146079 | 1        | 0.1460   |   |

|    |           |           |                                           |          |              |           |          |          |          |   |          |          |          |          |          |          |          |          |          |
|----|-----------|-----------|-------------------------------------------|----------|--------------|-----------|----------|----------|----------|---|----------|----------|----------|----------|----------|----------|----------|----------|----------|
| 8  | 42761230  | 42761249  | HOOK3                                     | 7.54E-12 | 4.93E-06     | 0.11894   | 0.055164 | 1        | 1        | 1 | 1        | 0.006173 | 1        | 1        | 0.115385 | 1.05E-18 | 0.014778 | 0.048956 |          |
| 15 | 44024081  | 44024112  | CKM11(dist=32661),CATSPER2P1(dist=4034)   | 1.17E-08 | 0.000205     | 1         | 1        | 1        | 1        | 1 | 1        | 0.006494 | 1        | 1        | 1        | 1        | 0.002068 | 1        | 0.003584 |
| 1  | 100671860 | 100671880 | DBT                                       | 1.36E-10 | 9.54E-13     | 0.103388  | 1        | 1        | 1        | 1 | 1        | 0.006849 | 1        | 0.019231 | 1        | 1        | 1.002605 | 1        | 0.006344 |
| 17 | 17035656  | 17035955  | MNP                                       | 0.01202  | 9.457792E-11 | 1         | 1        | 1        | 1        | 1 | 0.194976 | 1        | 0.000531 | 0.005882 | 1        | 1        | 0.93204  | 1        | 0.219981 |
| 14 | 94745068  | 94745095  | PPARA4                                    | 8.01E-09 | 1.4E-08      | 1         | 1        | 1        | 1        | 1 | 1        | 0.007463 | 1        | 0.098718 | 1        | 1        | 6.85E-05 | 1        | 0.016429 |
| 13 | 136529897 | 136529910 | UBXNA                                     | 9.15E-08 | 4.52E-11     | 1         | 0.050908 | 1        | 1        | 1 | 1        | 0.007463 | 1        | 1        | 1        | 1        | 4.68E-06 | 1        | 0.054393 |
| 8  | 124817605 | 124817620 | FAM91A1                                   | 1.15E-11 | 3.04E-08     | 0.122024  | 1        | 1        | 1        | 1 | 0.163647 | 1        | 0.007752 | 1        | 0.056729 | 1        | 3.47E-18 | 0.023256 | 0.171518 |
| 1  | 36019913  | 36019925  | KIAA0319L                                 | 2E-07    | 2.28E-10     | 1         | 1        | 1        | 1        | 1 | 0.063143 | 1        | 0.007813 | 0.036585 | 1        | 1        | 5.38E-09 | 1        | 0.004167 |
| 2  | 109123970 | 109124000 | GCC2                                      | 3.92E-07 | 1.09E-06     | 0.298824  | 1        | 1        | 1        | 1 | 1        | 0.008    | 1        | 1        | 0.166667 | 6.04E-10 | 0.07819  | 0.043873 |          |
| 13 | 50306915  | 50306932  | KPMB                                      | 3.88E-06 | 0.051282     | 0.028258  | 1        | 1        | 1        | 1 | 1        | 0.008333 | 1        | 0.017857 | 1        | 1        | 1.93E-05 | 1        | 0.116487 |
| 12 | 76456701  | 76456714  | PNP4                                      | 1.77E-05 | 0.002043     | 1         | 1        | 1        | 1        | 1 | 1        | 0.003885 | 1        | 1        | 1        | 1        | 5.43E-05 | 1        | 0.03939  |
| 16 | 17178358  | 17178365  | PHU22                                     | 8.8E-09  | 0.000222     | 1         | 1        | 1        | 1        | 1 | 1        | 0.009174 | 0.025862 | 0.016949 | 1        | 1        | 1.08E-08 | 1        | 0.009974 |
| 8  | 10366485  | 103664739 | KLF10                                     | 0.001576 | 0.010242     | 1         | 1        | 0.304366 | 1        | 1 | 1        | 0.011173 | 1        | 1        | 1        | 1        | 6.12E-07 | 1        | 0.122017 |
| 6  | 13620380  | 13620391  | NOL7                                      | 0.004639 | 0.00748      | 1         | 1        | 1        | 1        | 1 | 1        | 0.011364 | 1        | 1        | 1        | 1        | 0.025103 | 1        | 1        |
| 4  | 44081957  | 44081968  | MRLP14                                    | 0.000317 | 1.1E-11      | 0.047619  | 1        | 1        | 1        | 1 | 1        | 0.011364 | 1        | 1        | 1        | 1        | 0.000745 | 1        | 1        |
| 14 | 56104386  | 56104405  | KTN1                                      | 3.21E-10 | 8.85E-10     | 1         | 1        | 1        | 1        | 1 | 1        | 0.012195 | 0.000342 | 1        | 1        | 1        | 7.89E-11 | 0.033898 | 0.049107 |
| X  | 135767763 | 13576792  | HRHGF6                                    | 1.8E-08  | 0.000278     | 0.672112  | 1        | 1        | 1        | 1 | 1        | 0.012346 | 1        | 1        | 1        | 1        | 0.000181 | 1        | 0.013201 |
| 10 | 92752074  | 92752105  | BTAF1                                     | 2.79E-11 | 1.02E-09     | 0.588294  | 1        | 1        | 0.052941 | 1 | 1        | 0.012821 | 1        | 0.062398 | 1        | 1        | 1.38E-09 | 0.004446 | 0.150857 |
| 11 | 77692189  | 77692239  | INTS4                                     | 3.08E-09 | 1.57E-08     | 0.185616  | 1        | 1        | 1        | 1 | 1        | 0.012821 | 1        | 1        | 1        | 1        | 3.24E-13 | 1        | 0.280456 |
| 2  | 15676456  | 15676468  | NBAS                                      | 3.75E-10 | 2.4E-11      | 0.068966  | 1        | 1        | 1        | 1 | 1        | 0.012987 | 1        | 1        | 1        | 1        | 6.51E-05 | 1        | 0.217062 |
| 10 | 62544391  | 62544411  | CDK1                                      | 2.25E-05 | 4.16E-05     | 1         | 1        | 0.062857 | 1        | 1 | 1        | 0.013072 | 0.02439  | 1        | 1        | 1        | 0.000136 | 0.043478 | 0.059226 |
| 10 | 69961537  | 69961564  | MYPN                                      | 2.48E-06 | 0.002541     | 1         | 1        | 1        | 1        | 1 | 1        | 0.013245 | 0.033557 | 1        | 1        | 1        | 0.055135 | 1        | 0.171309 |
| 2  | 108999483 | 108999515 | SULT1C4                                   | 1.99E-07 | 7.04E-07     | 0.057971  | 1        | 1        | 0.064516 | 1 | 1        | 0.013245 | 1        | 1        | 1        | 1        | 3.34E-07 | 1        | 1        |
| 1  | 148594259 | 148594272 | NRP2F5P                                   | 9.82E-05 | 8.71E-09     | 0.066667  | 1        | 1        | 1        | 1 | 1        | 0.013514 | 0.022989 | 1        | 1        | 1        | 0.000397 | 1        | 0.061856 |
| 1  | 185951573 | 185951599 | HMCN1                                     | 8.88E-10 | 4.86E-09     | 0.0598205 | 1        | 1        | 0.105984 | 1 | 1        | 0.013605 | 1        | 1        | 1        | 1        | 2.79E-10 | 1        | 0.050481 |
| 20 | 47143048  | 47143054  | FTL1                                      | 1.13E-05 | 6.24E-05     | 1         | 1        | 1        | 1        | 1 | 1        | 0.013789 | 1        | 1        | 1        | 1        | 0.000974 | 1        | 1        |
| 7  | 5780521   | 5780558   | RNF216                                    | 0.003038 | 5.5E-07      | 1         | 1        | 1        | 1        | 1 | 1        | 0.013793 | 1        | 1        | 1        | 1        | 0.00053  | 1        | 0.175854 |
| 11 | 102575512 | 102575536 | MMP27                                     | 9.73E-05 | 1.97E-07     | 1         | 1        | 1        | 1        | 1 | 1        | 0.013889 | 1        | 1        | 1        | 1        | 8.54E-11 | 0.019231 | 9.59E-05 |
| 15 | 78839102  | 78839127  | PSMA4                                     | 0.136346 | 0.034429     | 1         | 1        | 1        | 1        | 1 | 1        | 0.013986 | 1        | 1        | 0.02     | 0.662112 | 1        | 0.03501  |          |
| 6  | 4861103   | 4861130   | GLYR1                                     | 2.01E-10 | 6.5E-07      | 1         | 1        | 1        | 1        | 1 | 1        | 0.014286 | 0.038217 | 1        | 1        | 1        | 7.62E-06 | 1        | 0.070225 |
| 3  | 108102580 | 108102602 | MYH15                                     | 0.000951 | 9.06E-07     | 0.122024  | 1        | 0.246647 | 1        | 1 | 1        | 0.014493 | 1        | 1        | 0.05     | 0.008854 | 1        | 0.00553  |          |
| 8  | 39114668  | 39114704  | KPMB2                                     | 2.13E-11 | 0.018946     | 0.082447  | 1        | 1        | 1        | 1 | 1        | 0.014599 | 1        | 1        | 1        | 1        | 1.84E-09 | 0.001947 | 1        |
| 11 | 11789571  | 11789575  | DCAN11                                    | 1.39E-05 | 0.216303     | 1         | 1        | 1        | 1        | 1 | 1        | 0.015267 | 1        | 1        | 1        | 1        | 0.002347 | 1        | 0.005641 |
| X  | 106396617 | 106396641 | NUP62CL                                   | 6.99E-12 | 3.02E-13     | 0.085106  | 1        | 1        | 1        | 1 | 1        | 0.015267 | 1        | 1        | 1        | 1        | 5.63E-11 | 0.00084  | 0.063291 |
| 13 | 21373161  | 21373193  | KP04                                      | 1.84E-06 | 5.95E-07     | 1         | 1        | 1        | 1        | 1 | 1        | 0.015625 | 1        | 1        | 1        | 1        | 0.002587 | 1        | 0.058201 |
| 17 | 57128711  | 57128722  | TRIM37                                    | 4.07E-05 | 4.76E-06     | 1         | 1        | 1        | 1        | 1 | 1        | 0.015625 | 1        | 0.035088 | 1        | 1        | 0.000438 | 1        | 0.029095 |
| 16 | 53721713  | 53721724  | RGRIP1L                                   | 1.53E-06 | 1.07E-10     | 1         | 1        | 1        | 1        | 1 | 1        | 0.015873 | 0.031008 | 1        | 1        | 1        | 0.000102 | 1        | 0.221703 |
| 7  | 105108955 | 105108983 | PUS7                                      | 3.03E-05 | 0.008274     | 0.072727  | 1        | 1        | 1        | 1 | 1        | 0.015873 | 1        | 1        | 1        | 1        | 0.000544 | 1        | 1        |
| 3  | 17418001  | 17418012  | IBC1D5                                    | 4.56E-06 | 5.52E-06     | 1         | 1        | 1        | 1        | 1 | 1        | 0.015873 | 0.214701 | 1        | 1        | 1        | 2.8E-09  | 0.030303 | 0.085714 |
| 10 | 71054441  | 71054469  | IKL1                                      | 4.42E-07 | 0.053371     | 1         | 1        | 1        | 1        | 1 | 1        | 0.034096 | 1        | 0.000649 | 1        | 1        | 0.000454 | 1        | 0.00376  |
| 3  | 225710433 | 225710459 | DOCK10                                    | 1.08E-05 | 4.18E-11     | 1         | 1        | 1        | 1        | 1 | 1        | 0.017699 | 0.108515 | 1        | 1        | 1        | 0.055468 | 1        | 0.097898 |
| 2  | 224760359 | 224760376 | WDFY1                                     | 0.11619  | 0.482587     | 1         | 1        | 1        | 1        | 1 | 1        | 0.018349 | 1        | 1        | 1        | 1        | 0.058401 | 1        | 1        |
| 7  | 171454541 | 171454562 | PLD1                                      | 3.29E-07 | 4.07E-08     | 1         | 1        | 1        | 1        | 1 | 1        | 0.019231 | 0.054348 | 1        | 0.142857 | 4.36E-09 | 0.047619 | 0.000386 |          |
| 19 | 12981477  | 12981503  | MAS1T                                     | 8.72E-08 | 1.36E-09     | 1         | 1        | 1        | 1        | 1 | 1        | 0.019417 | 1        | 1        | 1        | 1        | 0.022059 | 1        | 1        |
| 7  | 87323209  | 87323220  | ANR1, RUND3B                              | 1.58E-05 | 4.07E-09     | 1         | 0.096774 | 1        | 0.06865  | 1 | 1        | 0.019608 | 1        | 0.022727 | 1        | 1        | 0.102337 | 1        | 0.063492 |
| 14 | 68126414  | 68126425  | YTH18                                     | 3.85E-06 | 1.82E-06     | 1         | 1        | 1        | 1        | 1 | 1        | 0.020833 | 1        | 1        | 1        | 1        | 0.009922 | 1        | 0.020269 |
| 18 | 44448219  | 44448231  | PKNOX2                                    | 1.29E-09 | 2.21E-07     | 1         | 1        | 1        | 1        | 1 | 1        | 0.022232 | 1        | 1        | 1        | 1        | 2.59E-12 | 1        | 0.072727 |
| 5  | 16474764  | 16474785  | FAM13AB                                   | 7.85E-08 | 4.53E-11     | 0.096774  | 1        | 1        | 1        | 1 | 1        | 0.022727 | 1        | 0.072267 | 1        | 1        | 2.54E-10 | 1        | 1.35E-05 |
| 11 | 18231188  | 18231224  | LOC494141                                 | 0.000847 | 0.030834     | 1         | 1        | 0.071726 | 1        | 1 | 1        | 0.022556 | 1        | 1        | 1        | 1        | 9.68E-07 | 1        | 1        |
| 7  | 27614746  | 27614770  | NUPF2                                     | 2.84E-07 | 0.000282     | 1         | 1        | 1        | 1        | 1 | 1        | 0.022727 | 1        | 1        | 0.002597 | 9.48E-06 | 1        | 0.224377 |          |
| 11 | 114123141 | 114123159 | MAGI3                                     | 1.06E-07 | 1.59E-09     | 1         | 1        | 1        | 1        | 1 | 1        | 0.022727 | 1        | 1        | 1        | 1        | 1.74E-06 | 1        | 0.007154 |
| 12 | 7170167   | 7170178   | C1S                                       | 6.8E-07  | 4.25E-11     | 1         | 1        | 1        | 1        | 1 | 1        | 0.023256 | 0.010279 | 1        | 1        | 1        | 1.11E-07 | 1        | 0.069307 |
| 21 | 17135361  | 17135372  | USP25                                     | 0.000107 | 3.78E-07     | 0.076923  | 1        | 1        | 1        | 1 | 1        | 0.023529 | 1        | 0.0625   | 1        | 1        | 0.000461 | 0.000816 | 1        |
| 17 | 42326461  | 42326466  | HKDM1                                     | 1.54E-07 | 0.00763      | 1         | 1        | 1        | 1        | 1 | 1        | 0.024096 | 1        | 1        | 1        | 1        | 0.002347 | 1        | 0.203327 |
| 15 | 30003291  | 30003303  | TIPI1                                     | 2.04E-09 | 1.03E-09     | 0.047619  | 1        | 1        | 1        | 1 | 1        | 0.02439  | 0.012658 | 1        | 1        | 1        | 6.63E-05 | 1        | 0.003761 |
| 7  | 22206774  | 22206785  | RAPGEF5                                   | 0.000848 | 0.177419     | 0.083333  | 1        | 0.082569 | 1        | 1 | 1        | 0.02459  | 1        | 1        | 1        | 1        | 6.66E-07 | 1        | 1        |
| 10 | 131639306 | 131639325 | EBF3                                      | 1.53E-06 | 2.08E-09     | 1         | 1        | 0.081967 | 1        | 1 | 1        | 0.025    | 1        | 0.062004 | 1        | 0.002022 | 0.073418 | 0.131956 |          |
| 8  | 2017705   | 2017719   | MYO2                                      | 5.74E-09 | 7.65E-08     | 1         | 1        | 1        | 1        | 1 | 1        | 0.025236 | 1        | 1        | 1        | 1        | 8.42E-09 | 1        | 0.108636 |
| 13 | 30033645  | 30033656  | TIPI1                                     | 0.001211 | 0.002883     | 1         | 1        | 1        | 1        | 1 | 1        | 0.025641 | 1        | 1        | 0.065934 | 0.000341 | 0.00303  | 1        | 1        |
| 15 | 90993531  | 90993532  | ICPAG1                                    | 0.000151 | 2.78E-05     | 0.25994   | 1        | 1        | 1        | 1 | 1        | 0.025974 | 1        | 1        | 1        | 1        | 0.000577 | 1        | 0.007968 |
| 12 | 25710433  | 15305894  | CFAP23P(dist=85869),ANKRD20A1P(dist=9512) | 0.000061 | 9.38E-08     | 0.4       | 0.377966 | 0.365016 | 0.117541 | 1 | 1        | 0.026232 | 1        | 0.130439 | 1        | 1        | 0.000454 | 1        | 0.00376  |
| 13 | 25363466  | 25363477  | RNF17                                     | 6.05E-07 | 7.3E-11      | 1         | 1        | 1        | 1        | 1 | 1        | 0.026316 | 1        | 1        | 1        | 1        | 2.3E-07  | 1        | 0.095745 |
| 6  | 13652915  | 13652932  | RANBP9                                    | 0.000156 | 2.49E-07     | 1         | 1        | 1        | 1        | 1 | 1        | 0.026667 | 1        | 1        | 1        | 1        | 1.5E-08  | 1        | 1        |
| 11 | 111903890 | 111903901 | FRS1L                                     | 0.00066  | 0.012813     | 0.054054  | 1        | 1        | 1        | 1 | 1        | 0.026667 | 0.138961 | 1        | 1        | 1        | 0.00066  | 0.090909 | 0.018881 |
| 6  | 3558262   | 3558286   | CLUAP1                                    | 4.32E-08 | 2.88E-13     | 1         | 1        | 1        | 1        | 1 | 1        | 0.026755 | 1        | 1        | 1        | 1        | 4.57E-09 | 1        | 0.000159 |
| 12 | 1890035   | 1890046   | ADIPOR2                                   | 0.000446 | 1.84E-09     | 1         | 1        | 1        | 1        | 1 | 1        | 0.027027 | 0.052632 | 1        | 1        | 1        | 7.8E-07  | 1        | 0.070474 |
| 2  | 190670539 | 190670551 | PMS1                                      | 1.25E-07 | 0.002508     | 0.210521  | 1        | 1        | 1        | 1 | 1        | 0.027523 | 0.026316 | 1        | 0.304348 | 4.54E-08 | 0.037975 | 0.076847 |          |
|    |           |           |                                           |          |              |           |          |          |          |   |          |          |          |          |          |          |          |          |          |



|    |           |           |                                       |           |          |          |          |   |   |   |   |   |   |   |   |   |   |   |   |      |          |          |          |          |          |          |          |          |         |   |          |
|----|-----------|-----------|---------------------------------------|-----------|----------|----------|----------|---|---|---|---|---|---|---|---|---|---|---|---|------|----------|----------|----------|----------|----------|----------|----------|----------|---------|---|----------|
| 1  | 42966090  | 42966103  | PPCS(dist=27041),CCDC30(dist=34457)   | 5.91E-07  | 2.3E-07  | 1        | 1        | 1 | 1 | 1 | 1 | 1 | 1 | 1 | 1 | 1 | 1 | 1 | 1 | 1    | 0.028069 | 1        | 1        | 2.56E-07 | 1        | 1        | 0.054348 |          |         |   |          |
| 2  | 179094712 | 179094723 | MFN1                                  | 0.001871  | 1.5E-07  | 1        | 1        | 1 | 1 | 1 | 1 | 1 | 1 | 1 | 1 | 1 | 1 | 1 | 1 | 1    | 0.028571 | 1        | 1        | 5.7E-09  | 1        | 1        | 0.010991 |          |         |   |          |
| 3  | 185634171 | 185634196 | CENPU                                 | 4.86E-11  | 2.74E-12 | 1        | 1        | 1 | 1 | 1 | 1 | 1 | 1 | 1 | 1 | 1 | 1 | 1 | 1 | 1    | 0.028986 | 0.071429 | 1        | 1        | 1.56E-13 | 1        | 1        | 0.011091 |         |   |          |
| 4  | 20035327  | 20035337  | HTR3                                  | 0.231488  | 0.025825 | 1        | 1        | 1 | 1 | 1 | 1 | 1 | 1 | 1 | 1 | 1 | 1 | 1 | 1 | 1    | 0.029412 | 1        | 1        | 1        | 1        | 1        | 0.321881 |          |         |   |          |
| 10 | 123996879 | 123996899 | TACC2                                 | 0.000142  | 8.53E-08 | 1        | 1        | 1 | 1 | 1 | 1 | 1 | 1 | 1 | 1 | 1 | 1 | 1 | 1 | 1    | 0.029412 | 1        | 1        | 1        | 1        | 1        | 0.002555 |          |         |   |          |
| 13 | 45589547  | 45589558  | GPALP1                                | 1.34E-08  | 1.05E-12 | 0.074074 | 1        | 1 | 1 | 1 | 1 | 1 | 1 | 1 | 1 | 1 | 1 | 1 | 1 | 1    | 0.030864 | 1        | 1        | 1        | 1        | 1        | 0.034551 |          |         |   |          |
| 2  | 152267897 | 152267923 | RIF1                                  | 5.56E-06  | 3.11E-05 | 0.14976  | 0.064918 | 1 | 1 | 1 | 1 | 1 | 1 | 1 | 1 | 1 | 1 | 1 | 1 | 1    | 0.031371 | 1        | 1        | 0.090909 | 2.12E-14 | 1        | 1        | 1        |         |   |          |
| 11 | 8494831   | 8494856   | SKT33                                 | 8.94E-10  | 1.48E-08 | 1        | 1        | 1 | 1 | 1 | 1 | 1 | 1 | 1 | 1 | 1 | 1 | 1 | 1 | 1    | 0.032258 | 1        | 1        | 1        | 1        | 1        | 0.000562 |          |         |   |          |
| 3  | 37369724  | 37369761  | GOLGA4                                | 0.000997  | 0.046002 | 0.187805 | 1        | 1 | 1 | 1 | 1 | 1 | 1 | 1 | 1 | 1 | 1 | 1 | 1 | 1    | 0.03252  | 1        | 1        | 1        | 1        | 1        | 0.133921 |          |         |   |          |
| 20 | 29614290  | 29614296  | FRG1B                                 | 0.0467532 | 1        | 1        | 1        | 1 | 1 | 1 | 1 | 1 | 1 | 1 | 1 | 1 | 1 | 1 | 1 | 1    | 0.033708 | 1        | 1        | 1        | 1        | 1        | 1        |          |         |   |          |
| 10 | 79493504  | 79493505  | KOLM1A(dist=9327),DLG5(dist=59014)    | 0.023488  | 0.008766 | 1        | 1        | 1 | 1 | 1 | 1 | 1 | 1 | 1 | 1 | 1 | 1 | 1 | 1 | 1    | 0.033908 | 1        | 1        | 1        | 1        | 1        | 0.090306 |          |         |   |          |
| 3  | 183493743 | 183493771 | VEZ52                                 | 0.047209  | 1        | 1        | 1        | 1 | 1 | 1 | 1 | 1 | 1 | 1 | 1 | 1 | 1 | 1 | 1 | 1    | 0.034212 | 1        | 1        | 0.011905 | 0.083388 | 1        | 1        | 0.310159 |         |   |          |
| 1  | 205740426 | 205740441 | RAB29                                 | 0.003626  | 2.5E-06  | 0.235294 | 1        | 1 | 1 | 1 | 1 | 1 | 1 | 1 | 1 | 1 | 1 | 1 | 1 | 1    | 0.034783 | 1        | 1        | 1        | 1        | 1        | 0.014401 |          |         |   |          |
| 1  | 236708022 | 236708034 | LGA1S8                                | 0.000245  | 7.19E-10 | 0.222222 | 1        | 1 | 1 | 1 | 1 | 1 | 1 | 1 | 1 | 1 | 1 | 1 | 1 | 1    | 0.035505 | 0.035714 | 1        | 1        | 0.012756 | 1        | 1        | 0.012469 |         |   |          |
| 1  | 92944314  | 92944351  | GFI1                                  | 0.000954  | 1        | 1        | 1        | 1 | 1 | 1 | 1 | 1 | 1 | 1 | 1 | 1 | 1 | 1 | 1 | 1    | 0.036496 | 1        | 1        | 0.004449 | 0.049204 | 1        | 1        | 0.00043  |         |   |          |
| 7  | 94047903  | 94047914  | COL1A2                                | 1.96E-07  | 4.54E-06 | 0.142683 | 1        | 1 | 1 | 1 | 1 | 1 | 1 | 1 | 1 | 1 | 1 | 1 | 1 | 1    | 0.036842 | 1        | 1        | 0.004032 | 0.066667 | 0.003319 | 1        | 1        | 0.02182 |   |          |
| 2  | 70070184  | 70070208  | GMLC1                                 | 9.93E-11  | 0.015444 | 1        | 1        | 1 | 1 | 1 | 1 | 1 | 1 | 1 | 1 | 1 | 1 | 1 | 1 | 1    | 0.038462 | 1        | 1        | 1        | 1        | 1        | 0.114032 |          |         |   |          |
| 16 | 58557209  | 58557220  | CPY1                                  | 1.63E-05  | 0.001961 | 0.051724 | 1        | 1 | 1 | 1 | 1 | 1 | 1 | 1 | 1 | 1 | 1 | 1 | 1 | 1    | 0.040323 | 0.05445  | 0.370779 | 1        | 1        | 1        | 0.084719 |          |         |   |          |
| 6  | 90491071  | 90491082  | MDM1                                  | 1.14E-05  | 1.73E-08 | 1        | 1        | 1 | 1 | 1 | 1 | 1 | 1 | 1 | 1 | 1 | 1 | 1 | 1 | 1    | 0.040404 | 1        | 1        | 1        | 1        | 1        | 0.065693 |          |         |   |          |
| 3  | 53531142  | 53531165  | CACNA1D                               | 0.050219  | 2.9E-07  | 1        | 1        | 1 | 1 | 1 | 1 | 1 | 1 | 1 | 1 | 1 | 1 | 1 | 1 | 1    | 0.040816 | 1        | 1        | 1        | 1        | 1        | 0.027778 |          |         |   |          |
| 7  | 72667735  | 72667760  | NCF1B(dist=17756),NSUN5(dist=48753)   | 2.28E-08  | 0.044392 | 0.57247  | 1        | 1 | 1 | 1 | 1 | 1 | 1 | 1 | 1 | 1 | 1 | 1 | 1 | 1    | 0.041881 | 1        | 1        | 1        | 1        | 1        | 0.000955 |          |         |   |          |
| 22 | 32841691  | 32841723  | BPIFC                                 | 0.046059  | 1        | 1        | 1        | 1 | 1 | 1 | 1 | 1 | 1 | 1 | 1 | 1 | 1 | 1 | 1 | 1    | 0.041958 | 1        | 1        | 1        | 1        | 1        | 0.127483 |          |         |   |          |
| 2  | 198264715 | 198264732 | SFB31                                 | 0.014936  | 0.00012  | 0.083333 | 1        | 1 | 1 | 1 | 1 | 1 | 1 | 1 | 1 | 1 | 1 | 1 | 1 | 1    | 0.042857 | 1        | 1        | 1        | 1        | 1        | 0.094508 |          |         |   |          |
| 2  | 170678569 | 170678588 | METTL5                                | 0.000928  | 5.23E-05 | 1        | 1        | 1 | 1 | 1 | 1 | 1 | 1 | 1 | 1 | 1 | 1 | 1 | 1 | 1    | 0.043478 | 1        | 1        | 1        | 1        | 1        | 0.051724 |          |         |   |          |
| 11 | 85421989  | 85422001  | SYTL2                                 | 1.09E-10  | 2.55E-12 | 0.075143 | 1        | 1 | 1 | 1 | 1 | 1 | 1 | 1 | 1 | 1 | 1 | 1 | 1 | 1    | 0.044248 | 1        | 1        | 1        | 0.009561 | 0.052623 | 1        | 1        | 0.04318 |   |          |
| 2  | 38017543  | 38017639  | DMT1                                  | 0.14E-03  | 1        | 1        | 1        | 1 | 1 | 1 | 1 | 1 | 1 | 1 | 1 | 1 | 1 | 1 | 1 | 1    | 0.044545 | 1        | 1        | 1        | 1        | 1        | 0.318881 |          |         |   |          |
| 3  | 5022981   | 5022992   | BHME40                                | 0.558895  | 0.656805 | 1        | 1        | 1 | 1 | 1 | 1 | 1 | 1 | 1 | 1 | 1 | 1 | 1 | 1 | 1    | 0.045726 | 1        | 1        | 0.047619 | 1        | 1        | 1        | 0.088314 |         |   |          |
| 10 | 9007492   | 9007509   | A2ML1                                 | 1.52E-05  | 0.000964 | 0.103158 | 1        | 1 | 1 | 1 | 1 | 1 | 1 | 1 | 1 | 1 | 1 | 1 | 1 | 1    | 0.046296 | 1        | 1        | 1        | 1        | 1        | 0.20768  |          |         |   |          |
| 13 | 113908908 | 113908936 | CUL4A                                 | 6.68E-05  | 0.000245 | 0.075    | 1        | 1 | 1 | 1 | 1 | 1 | 1 | 1 | 1 | 1 | 1 | 1 | 1 | 1    | 0.046667 | 1        | 1        | 1        | 1        | 1        | 0.122953 |          |         |   |          |
| 6  | 30545853  | 30545864  | ABC1F                                 | 1.39E-09  | 7.15E-13 | 0.178197 | 1        | 1 | 1 | 1 | 1 | 1 | 1 | 1 | 1 | 1 | 1 | 1 | 1 | 1    | 0.047619 | 1        | 1        | 1        | 1        | 1        | 0.066667 |          |         |   |          |
| 12 | 72023336  | 72023373  | ZPC3H1                                | 2.31E-06  | 0.168339 | 1        | 1        | 1 | 1 | 1 | 1 | 1 | 1 | 1 | 1 | 1 | 1 | 1 | 1 | 1    | 0.048041 | 1        | 1        | 1        | 1        | 1        | 0.012911 |          |         |   |          |
| 6  | 83842074  | 83842105  | DOPY1                                 | 0.168556  | 0.00433  | 1        | 1        | 1 | 1 | 1 | 1 | 1 | 1 | 1 | 1 | 1 | 1 | 1 | 1 | 1    | 0.04902  | 1        | 1        | 0.3125   | 0.241935 | 1        | 1        | 1        |         |   |          |
| 5  | 74493504  | 74493505  | TRIP12(dist=63728),CNT4(dist=96886)   | 6.84E-05  | 1.13E-12 | 1        | 1        | 1 | 1 | 1 | 1 | 1 | 1 | 1 | 1 | 1 | 1 | 1 | 1 | 1    | 0.000451 | 1        | 1        | 1        | 1        | 1        | 0.033333 |          |         |   |          |
| 16 | 3306766   | 3306999   | TIGD7                                 | 5.2E-09   | 1.19E-11 | 0.153627 | 1        | 1 | 1 | 1 | 1 | 1 | 1 | 1 | 1 | 1 | 1 | 1 | 1 | 1    | 0.000673 | 1        | 1        | 1        | 1        | 1        | 0.052294 |          |         |   |          |
| 10 | 112211000 | 112211025 | SMNDC1(dist=146293),DUSP5(dist=46600) | 2.05E-07  | 9.23E-08 | 0.1      | 1        | 1 | 1 | 1 | 1 | 1 | 1 | 1 | 1 | 1 | 1 | 1 | 1 | 1    | 0.002449 | 1        | 1        | 1        | 1        | 1        | 0.051606 |          |         |   |          |
| 2  | 230705516 | 230705530 | TRIP12                                | 2.66E-10  | 5.89E-10 | 1        | 1        | 1 | 1 | 1 | 1 | 1 | 1 | 1 | 1 | 1 | 1 | 1 | 1 | 1    | 0.084472 | 1        | 1        | 1        | 0.055036 | 0.010101 | 0.238095 | 6.6E-15  | 1       | 1 | 0.012519 |
| 12 | 108104315 | 108104351 | PWP1                                  | 0.1901    | 0.241379 | 1        | 1        | 1 | 1 | 1 | 1 | 1 | 1 | 1 | 1 | 1 | 1 | 1 | 1 | 1    | 0.0125   | 1        | 1        | 1        | 1        | 1        | 0.192308 |          |         |   |          |
| 15 | 76191743  | 76191755  | UBE2O2                                | 1.47E-10  | 1.1E-05  | 0.112605 | 1        | 1 | 1 | 1 | 1 | 1 | 1 | 1 | 1 | 1 | 1 | 1 | 1 | 1    | 0.012821 | 1        | 1        | 1        | 1        | 1        | 0.157606 |          |         |   |          |
| 3  | 93754080  | 93754099  | ARL13B                                | 1.36E-09  | 0.000103 | 0.071429 | 1        | 1 | 1 | 1 | 1 | 1 | 1 | 1 | 1 | 1 | 1 | 1 | 1 | 1    | 0.013333 | 1        | 1        | 1        | 1        | 1        | 0.021739 |          |         |   |          |
| 7  | 45509526  | 45509535  | INSIG1                                | 2.45E-05  | 0.15E-11 | 1        | 1        | 1 | 1 | 1 | 1 | 1 | 1 | 1 | 1 | 1 | 1 | 1 | 1 | 1    | 0.013821 | 0.230789 | 1        | 1        | 1        | 1        | 1        | 0.001224 |         |   |          |
| 10 | 104449572 | 104449619 | ARL3                                  | 7.02E-09  | 0.008969 | 0.052632 | 1        | 1 | 1 | 1 | 1 | 1 | 1 | 1 | 1 | 1 | 1 | 1 | 1 | 1    | 0.014085 | 1        | 1        | 1        | 1        | 1        | 0.001003 |          |         |   |          |
| 2  | 29449706  | 29449717  | NOM1(dist=NONE),FRG1B(dist=162162)    | 2.23E-06  | 1        | 1        | 1        | 1 | 1 | 1 | 1 | 1 | 1 | 1 | 1 | 1 | 1 | 1 | 1 | 1    | 0.014706 | 1        | 1        | 1        | 1        | 1        | 0.000287 |          |         |   |          |
| 13 | 45781539  | 45781550  | GTF2F                                 | 8.04E-12  | 3.95E-09 | 1        | 1        | 1 | 1 | 1 | 1 | 1 | 1 | 1 | 1 | 1 | 1 | 1 | 1 | 1    | 0.014925 | 1        | 1        | 1        | 1        | 1        | 0.005836 |          |         |   |          |
| 12 | 120590802 | 120590830 | ING3                                  | 2.78E-07  | 1.92E-05 | 1        | 1        | 1 | 1 | 1 | 1 | 1 | 1 | 1 | 1 | 1 | 1 | 1 | 1 | 1    | 0.015152 | 1        | 1        | 1        | 1        | 1        | 0.041096 |          |         |   |          |
| 11 | 27412757  | 27412806  | LGR4                                  | 0.000123  | 0.415653 | 0.157591 | 1        | 1 | 1 | 1 | 1 | 1 | 1 | 1 | 1 | 1 | 1 | 1 | 1 | 1    | 0.015625 | 1        | 1        | 1        | 1        | 1        | 0.082126 |          |         |   |          |
| 20 | 7976762   | 7976773   | TMX4                                  | 1.1E-08   | 8.24E-07 | 0.057143 | 1        | 1 | 1 | 1 | 1 | 1 | 1 | 1 | 1 | 1 | 1 | 1 | 1 | 1    | 0.015625 | 1        | 1        | 1        | 1        | 1        | 0.008333 |          |         |   |          |
| 10 | 88573099  | 88573120  | AGRP11                                | 2.38E-05  | 1.66E-07 | 1        | 1        | 1 | 1 | 1 | 1 | 1 | 1 | 1 | 1 | 1 | 1 | 1 | 1 | 1    | 0.078947 | 0.013873 | 1        | 1        | 1        | 1        | 1        | 0.005111 |         |   |          |
| 3  | 39152386  | 39152408  | NR1                                   | 2.15E-05  | 0.068379 | 0.051282 | 1        | 1 | 1 | 1 | 1 | 1 | 1 | 1 | 1 | 1 | 1 | 1 | 1 | 1    | 0.016229 | 1        | 1        | 1        | 1        | 1        | 0.012821 |          |         |   |          |
| 12 | 123886190 | 123886202 | CNTRL                                 | 1.16E-06  | 2.55E-05 | 0.065217 | 1        | 1 | 1 | 1 | 1 | 1 | 1 | 1 | 1 | 1 | 1 | 1 | 1 | 1    | 0.016129 | 1        | 1        | 1        | 1        | 1        | 0.024342 |          |         |   |          |
| 16 | 15141966  | 15141977  | NTAN1,PDXD1C1                         | 0.288196  | 0.000478 | 1        | 1        | 1 | 1 | 1 | 1 | 1 | 1 | 1 | 1 | 1 | 1 | 1 | 1 | 0.25 | 0.016949 | 1        | 1        | 1        | 0.00362  | 1        | 1        | 1        |         |   |          |
| 7  | 56052489  | 56052500  | GBAS                                  | 0.004762  | 0.000456 | 0.051724 | 1        | 1 | 1 | 1 | 1 | 1 | 1 | 1 | 1 | 1 | 1 | 1 | 1 | 1    | 0.016949 | 1        | 1        | 1        | 1        | 1        | 0.246825 |          |         |   |          |
| 5  | 72795055  | 72795066  | BTF3                                  | 5.57E-07  | 3.48E-07 | 1        | 1        | 1 | 1 | 1 | 1 | 1 | 1 | 1 | 1 | 1 | 1 | 1 | 1 | 1    | 0.017241 | 0.294118 | 1        | 1        | 1        | 1        | 1        | 0.007974 |         |   |          |
| 1  | 86241399  | 86241410  | COL24A1                               | 0.000262  | 9.31E-07 | 1        | 1        | 1 | 1 | 1 | 1 | 1 | 1 | 1 | 1 | 1 | 1 | 1 | 1 | 1    | 0.018182 | 1        | 1        | 1        | 1        | 1        | 0.000982 |          |         |   |          |
| 3  | 37579999  | 37580023  | CGSC8                                 | 2.59E-05  | 0.384449 | 1        | 1        | 1 | 1 | 1 | 1 | 1 | 1 | 1 | 1 | 1 | 1 | 1 | 1 | 1    | 0.018321 | 0.230789 | 1        | 1        | 1        | 1        | 1        | 0.005111 |         |   |          |
| 13 | 211521401 | 211521424 | PGC1                                  | 9.14E-05  | 0.0      |          |          |   |   |   |   |   |   |   |   |   |   |   |   |      |          |          |          |          |          |          |          |          |         |   |          |



|    |           |           |                                            |          |          |          |          |          |          |          |          |   |   |   |   |   |       |          |          |          |          |          |          |
|----|-----------|-----------|--------------------------------------------|----------|----------|----------|----------|----------|----------|----------|----------|---|---|---|---|---|-------|----------|----------|----------|----------|----------|----------|
| 17 | 4906146   | 4906166   | KIF1C                                      | 4.03E-05 | 8.36E-05 | 1        | 1        | 0.31543  | 1        | 1        | 1        | 1 | 1 | 1 | 1 | 1 | 1     | 0.133333 | 0.047619 | 0.136785 | 0.213505 | 0.370843 |          |
| 15 | 30875074  | 30875089  | ULK4P1,ULK4P2                              | 4.62E-05 | 5.72E-13 | 0.231061 | 1        | 1        | 1        | 1        | 1        | 1 | 1 | 1 | 1 | 1 | 1     | 0.176043 | 1        | 1        | 2.23E-26 | 0.322421 |          |
| 9  | 77457028  | 77457044  | TRPM6                                      | 1.56E-08 | 1.29E-06 | 1        | 1        | 1        | 1        | 1        | 1        | 1 | 1 | 1 | 1 | 1 | 1     | 1        | 5.91E-20 | 1        | 1        | 0.003048 |          |
| 9  | 88571253  | 88571273  | NAK3                                       | 7.47E-08 | 8.04E-13 | 0.076923 | 1        | 1        | 1        | 1        | 1        | 1 | 1 | 1 | 1 | 1 | 1     | 1        | 1        | 2.46E-18 | 1        | 0.003288 |          |
| 1  | 36475026  | 36475037  | AGO3                                       | 2.8E-10  | 9.53E-11 | 1        | 1        | 1        | 1        | 1        | 1        | 1 | 1 | 1 | 1 | 1 | 1     | 1        | 2.6E-17  | 0.027027 | 1        | 1        |          |
| 4  | 3938949   | 3938988   | ADR2A2(dist=168696),FAM86E(dist=4701)      | 0.000338 | 0.031842 | 1        | 1        | 1        | 1        | 1        | 1        | 1 | 1 | 1 | 1 | 1 | 1     | 1        | 1        | 1.26E-16 | 1        | 0.16591  |          |
| 5  | 74872797  | 74872809  | POLK                                       | 1.17E-07 | 1.59E-09 | 1        | 1        | 0.081818 | 1        | 1        | 1        | 1 | 1 | 1 | 1 | 1 | 1     | 1        | 1        | 1.56E-16 | 1        | 1        |          |
| 5  | 159839530 | 159839545 | SLU7                                       | 8.59E-12 | 0.041121 | 0.147905 | 1        | 1        | 1        | 1        | 1        | 1 | 1 | 1 | 1 | 1 | 1     | 1        | 1        | 2.17E-16 | 1        | 0.118874 |          |
| 3  | 68680781  | 68680799  | RAD17                                      | 6.04E-07 | 2.1E-06  | 0.050633 | 1        | 1        | 1        | 1        | 1        | 1 | 1 | 1 | 1 | 1 | 1     | 0.055556 | 1        | 1        | 7.69E-16 | 0.039732 |          |
| 3  | 122629656 | 122629675 | SEMAS8                                     | 0.002974 | 1.02E-05 | 1        | 1        | 1        | 1        | 1        | 1        | 1 | 1 | 1 | 1 | 1 | 1     | 1        | 1        | 9.54E-16 | 1        | 0.086538 |          |
| 5  | 68305347  | 68305367  | KDM7                                       | 9.99E-08 | 0.001633 | 0.096934 | 1        | 1        | 1        | 1        | 1        | 1 | 1 | 1 | 1 | 1 | 1     | 1        | 1        | 2.46E-19 | 1        | 0.141518 |          |
| 16 | 31389634  | 31389654  | ITGAX                                      | 2.02E-10 | 1.83E-09 | 1        | 1        | 1        | 1        | 1        | 1        | 1 | 1 | 1 | 1 | 1 | 1     | 1        | 1        | 2.66E-15 | 1        | 0.153211 |          |
| 20 | 50286484  | 50286496  | ATPA9                                      | 1.2E-11  | 6.64E-06 | 1        | 1        | 1        | 1        | 1        | 1        | 1 | 1 | 1 | 1 | 1 | 1     | 0.195707 | 0.068947 | 1        | 1        | 0.003344 |          |
| 11 | 102587154 | 102587179 | MMBP8                                      | 2.62E-08 | 1.95E-06 | 0.076923 | 1        | 1        | 1        | 1        | 1        | 1 | 1 | 1 | 1 | 1 | 1     | 1        | 1        | 4.11E-15 | 1        | 0.022332 |          |
| 8  | 186479586 | 186479604 | KNG1(dist=17387),EP4A2(dist=21757)         | 0.001335 | 3.7E-07  | 1        | 1        | 1        | 1        | 1        | 1        | 1 | 1 | 1 | 1 | 1 | 1     | 1        | 1        | 5.23E-15 | 1        | 0.01311  |          |
| 3  | 129811872 | 129811898 | ALG12                                      | 0.003344 | 1        | 1        | 1        | 1        | 0.0625   | 1        | 1        | 1 | 1 | 1 | 1 | 1 | 1     | 1        | 1        | 9.94E-15 | 0.03612  | 1        |          |
| 19 | 41062902  | 41062914  | SPTB84                                     | 5.38E-09 | 1.09E-08 | 0.057692 | 1        | 1        | 1        | 1        | 1        | 1 | 1 | 1 | 1 | 1 | 1     | 0.238507 | 0.1875   | 1        | 1.33E-14 | 0.107306 | 0.220044 |
| 14 | 50280815  | 50280836  | NEHF                                       | 1.83E-07 | 2.5E-09  | 0.051948 | 1        | 1        | 1        | 1        | 1        | 1 | 1 | 1 | 1 | 1 | 1     | 1        | 1        | 6.3E-14  | 1        | 0.249861 |          |
| 11 | 9455952   | 9455965   | PO7                                        | 5.17E-05 | 1.69E-06 | 1        | 1        | 0.297504 | 1        | 1        | 1        | 1 | 1 | 1 | 1 | 1 | 1     | 1        | 1        | 1.3E-13  | 1        | 0.034286 |          |
| 4  | 103237003 | 103237014 | SLC39A8                                    | 2.25E-10 | 2.06E-09 | 0.096341 | 1        | 1        | 1        | 0.051805 | 1        | 1 | 1 | 1 | 1 | 1 | 1     | 1        | 0.077267 | 1        | 2.5E-13  | 1        | 0.001109 |
| 17 | 59001879  | 59001898  | BCAS3                                      | 2.68E-11 | 4.46E-05 | 0.096934 | 1        | 1        | 1        | 1        | 1        | 1 | 1 | 1 | 1 | 1 | 1     | 1        | 1        | 3.54E-13 | 1        | 0.022221 |          |
| 12 | 121613113 | 121613133 | P2RX7                                      | 0.002044 | 0.000202 | 0.071429 | 1        | 1        | 1        | 1        | 1        | 1 | 1 | 1 | 1 | 1 | 1     | 1        | 1        | 6.65E-13 | 0.072054 | 0.060872 |          |
| 2  | 202073748 | 202073787 | CASP10                                     | 3.2E-10  | 4.11E-07 | 1        | 1        | 1        | 1        | 1        | 1        | 1 | 1 | 1 | 1 | 1 | 1     | 1        | 1        | 6.72E-13 | 1        | 0.004219 |          |
| 5  | 64629824  | 64629864  | ADAMT56                                    | 1        | 1        | 1        | 1        | 1        | 1        | 1        | 1        | 1 | 1 | 1 | 1 | 1 | 1     | 1        | 1        | 1.93E-12 | 1        | 1        |          |
| 5  | 37321272  | 37321301  | ITP2                                       | 0.000168 | 9.44E-08 | 1        | 1        | 1        | 1        | 1        | 1        | 1 | 1 | 1 | 1 | 1 | 1     | 1        | 1        | 2.42E-12 | 1        | 1        |          |
| 5  | 125809712 | 125809804 | GRAMD3                                     | 1.88E-08 | 6.51E-09 | 0.076923 | 1        | 1        | 0.248712 | 1        | 1        | 1 | 1 | 1 | 1 | 1 | 1     | 1        | 1        | 3.6E-12  | 1        | 1        |          |
| 20 | 47770443  | 47770478  | STAU1                                      | 2.88E-05 | 4.54E-06 | 1        | 1        | 1        | 1        | 1        | 1        | 1 | 1 | 1 | 1 | 1 | 1     | 1        | 1        | 5.2E-12  | 1        | 0.00036  |          |
| 1  | 11187618  | 11187628  | MTOR                                       | 0.029057 | 2.33E-11 | 0.066667 | 1        | 1        | 1        | 1        | 1        | 1 | 1 | 1 | 1 | 1 | 0.125 | 1        | 1        | 5.5E-12  | 1        | 0.113924 |          |
| 11 | 135958875 | 135958891 | RNMX                                       | 0.000318 | 4.4E-08  | 0.06     | 1        | 1        | 1        | 1        | 1        | 1 | 1 | 1 | 1 | 1 | 1     | 1        | 1        | 9.54E-12 | 0.055556 | 1        |          |
| X  | 121175278 | 121175289 | SC5D                                       | 9.71E-05 | 3.44E-11 | 0.12234  | 0.194524 | 1        | 1        | 1        | 1        | 1 | 1 | 1 | 1 | 1 | 1     | 1        | 0.166667 | 6.78E-12 | 0.277778 | 0.407909 |          |
| 12 | 69119604  | 69119635  | NUPF1D7                                    | 7.82E-05 | 0.00059  | 0.068493 | 1        | 1        | 1        | 1        | 1        | 1 | 1 | 1 | 1 | 1 | 1     | 1        | 1        | 6.84E-12 | 0.030203 | 0.126539 |          |
| 3  | 40508423  | 40508441  | HMC01(dist=34277),LOC10273854(dist=200941) | 0.000238 | 0.000234 | 1        | 1        | 1        | 1        | 1        | 1        | 1 | 1 | 1 | 1 | 1 | 1     | 0.310343 | 0.220204 | 1        | 1        | 0.014548 |          |
| 3  | 148583231 | 148583243 | CPA3                                       | 5.13E-09 | 1.48E-11 | 0.092262 | 1        | 0.051948 | 1        | 1        | 1        | 1 | 1 | 1 | 1 | 1 | 1     | 0.117196 | 1        | 1        | 1.13E-11 | 0.010962 |          |
| 4  | 177100754 | 177100775 | WDR17                                      | 8.53E-11 | 2.28E-11 | 1        | 1        | 1        | 1        | 1        | 1        | 1 | 1 | 1 | 1 | 1 | 1     | 1        | 1        | 1.90476  | 1.24E-11 | 1        |          |
| 3  | 15080602  | 15080612  | NRC2C                                      | 1.71E-10 | 1.69E-06 | 0.233443 | 1        | 1        | 0.138684 | 1        | 1        | 1 | 1 | 1 | 1 | 1 | 1     | 0.072289 | 1        | 1.48E-11 | 0.031746 | 0.030572 |          |
| X  | 110406671 | 110406683 | PAK3                                       | 2.02E-11 | 1.66E-09 | 0.107071 | 1        | 0.058824 | 1        | 0.05775  | 1        | 1 | 1 | 1 | 1 | 1 | 1     | 1        | 1        | 1.97E-11 | 0.056338 | 0.001585 |          |
| 13 | 114240056 | 114240112 | FRFB1                                      | 2.03E-10 | 8.58E-12 | 1        | 1        | 1        | 1        | 1        | 1        | 1 | 1 | 1 | 1 | 1 | 1     | 1        | 0.166667 | 2.77E-11 | 0.033333 | 2.79E-05 |          |
| 1  | 147411014 | 147411028 | GRBP8B                                     | 5.36E-08 | 0.311459 | 0.132086 | 1        | 1        | 1        | 1        | 1        | 1 | 1 | 1 | 1 | 1 | 1     | 1        | 1        | 3.2E-11  | 1        | 0.001425 |          |
| 10 | 56080869  | 56080903  | HCLF                                       | 0.000166 | 4.02E-07 | 1        | 1        | 0.052768 | 0.208791 | 0.151898 | 1        | 1 | 1 | 1 | 1 | 1 | 1     | 0.357143 | 0.040808 | 0.094073 | 0.004    |          |          |
| 19 | 49657710  | 49657753  | ITPL                                       | 0.013266 | 1        | 1        | 1        | 0.384729 | 1        | 1        | 1        | 1 | 1 | 1 | 1 | 1 | 1     | 0.067227 | 1        | 3.5E-11  | 0.339516 | 0.028122 |          |
| 12 | 7521563   | 7521588   | CD163L1                                    | 5.58E-12 | 1.39E-07 | 1        | 1        | 1        | 1        | 1        | 1        | 1 | 1 | 1 | 1 | 1 | 1     | 1        | 1        | 5.43E-11 | 1        | 0.117376 |          |
| 5  | 151784731 | 151784768 | NMUR2                                      | 1.01E-09 | 4.51E-08 | 0.074627 | 1        | 1        | 1        | 1        | 1        | 1 | 1 | 1 | 1 | 1 | 1     | 1        | 1        | 6.63E-11 | 1        | 0.113204 |          |
| 2  | 209049812 | 209049831 | C2orf87                                    | 4.24E-06 | 2.03E-11 | 1        | 1        | 1        | 1        | 1        | 1        | 1 | 1 | 1 | 1 | 1 | 1     | 1        | 1        | 6.79E-11 | 0.068966 | 0.179905 |          |
| 7  | 128413997 | 128414041 | OPN15W                                     | 2.88E-06 | 7.66E-06 | 1        | 1        | 1        | 1        | 1        | 1        | 1 | 1 | 1 | 1 | 1 | 1     | 1        | 1        | 0.074074 | 2.8E-05  | 1        |          |
| 6  | 100901513 | 100901552 | SIM1                                       | 0.000712 | 0.001909 | 0.055556 | 0.056526 | 1        | 0.068356 | 1        | 1        | 1 | 1 | 1 | 1 | 1 | 1     | 1        | 1        | 0.114893 | 0.000446 | 1        |          |
| 13 | 158390443 | 158390459 | TRPC2                                      | 7.1E-10  | 9.54E-06 | 1        | 1        | 1        | 1        | 1        | 1        | 1 | 1 | 1 | 1 | 1 | 1     | 1        | 1        | 0.040348 | 0.021726 | 0.067692 |          |
| 8  | 42832373  | 42832384  | HMOX3                                      | 0.000235 | 1.56E-10 | 1        | 1        | 1        | 1        | 1        | 1        | 1 | 1 | 1 | 1 | 1 | 1     | 1        | 1        | 6.02E-07 | 0.032333 | 0.084337 |          |
| 5  | 133707247 | 133707259 | UBE2B                                      | 0.160528 | 0.029629 | 1        | 1        | 1        | 1        | 1        | 1        | 1 | 1 | 1 | 1 | 1 | 1     | 0.125    | 0.003122 | 0.020971 | 1        | 1        |          |
| 1  | 113196179 | 113196217 | CPAZA1                                     | 0.155434 | 9.6E-08  | 0.063492 | 1        | 1        | 1        | 1        | 1        | 1 | 1 | 1 | 1 | 1 | 1     | 1        | 1        | 2.57E-08 | 0.00752  | 0.120366 |          |
| 3  | 73440108  | 73440119  | PDZRN3                                     | 3.75E-08 | 9.23E-08 | 0.321524 | 1        | 0.093363 | 0.157582 | 1        | 0.121555 | 1 | 1 | 1 | 1 | 1 | 1     | 0.125    | 5.86E-08 | 0.00895  | 0.125158 |          |          |
| 3  | 31765848  | 31765875  | LSM2                                       | 0.000165 | 0.122915 | 1        | 1        | 1        | 1        | 1        | 1        | 1 | 1 | 1 | 1 | 1 | 1     | 1        | 1        | 0.002311 | 0.012195 | 1        |          |
| 12 | 39716416  | 39716427  | KIF21A                                     | 6.38E-07 | 2.95E-11 | 1        | 1        | 1        | 1        | 1        | 1        | 1 | 1 | 1 | 1 | 1 | 1     | 1        | 1        | 0.003045 | 0.014499 | 0.002454 |          |
| 10 | 20589975  | 20589983  | TRPC4                                      | 5.05E-06 | 2.39E-07 | 0.171123 | 0.257484 | 1        | 1        | 1        | 1        | 1 | 1 | 1 | 1 | 1 | 1     | 1        | 1        | 4.4E-08  | 0.027333 | 0.067692 |          |
| 8  | 17137984  | 17137997  | USP37A                                     | 0.000553 | 0.000922 | 1        | 1        | 1        | 1        | 1        | 1        | 1 | 1 | 1 | 1 | 1 | 1     | 1        | 1        | 0.004896 | 0.016292 | 1        |          |
| 3  | 193272422 | 193272477 | ATP13A4-AS1                                | 0.048316 | 1        | 0.210521 | 1        | 1        | 1        | 1        | 1        | 1 | 1 | 1 | 1 | 1 | 1     | 1        | 0.052632 | 0.002508 | 0.018868 | 0.408661 |          |
| 4  | 108824275 | 108824292 | LOC101929595                               | 0.000803 | 0.000415 | 1        | 1        | 1        | 1        | 1        | 1        | 1 | 1 | 1 | 1 | 1 | 1     | 1        | 1        | 0.048123 | 0.018868 | 1        |          |
| 1  | 62175139  | 62175150  | TMD21                                      | 6.32E-05 | 2.35E-06 | 0.088889 | 1        | 1        | 1        | 1        | 1        | 1 | 1 | 1 | 1 | 1 | 1     | 1        | 1        | 5.25E-07 | 0.019231 | 0.082835 |          |
| 10 | 115370113 | 115370147 | NRAP                                       | 1.3E-05  | 0.080214 | 0.092308 | 1        | 1        | 1        | 1        | 1        | 1 | 1 | 1 | 1 | 1 | 1     | 1        | 1        | 1.11E-06 | 0.019231 | 1        |          |
| X  | 19018109  | 19018130  | GRP64                                      | 9.91E-06 | 8.21E-05 | 1        | 1        | 1        | 1        | 1        | 1        | 1 | 1 | 1 | 1 | 1 | 1     | 1        | 1        | 1.97E-05 | 0.020408 | 1        |          |
| 13 | 20772728  | 20772789  | NSPC1                                      | 0.075731 | 3.74E-05 | 1        | 1        | 1        | 1        | 1        | 1        | 1 | 1 | 1 | 1 | 1 | 1     | 1        | 1        | 2.19E-06 | 0.021739 | 0.013628 |          |
| 12 | 42371716  | 42371735  | ECR1B                                      | 1.33E-08 | 9.08E-05 | 0.163323 | 1        | 1        | 1        | 1        | 1        | 1 | 1 | 1 | 1 | 1 | 1     | 1        | 1        | 0.025467 | 0.032333 | 0.062827 |          |
| 6  | 43021903  | 43021943  | MRP12                                      | 0.070444 | 2.96E-05 | 1        | 1        | 1        | 1        | 1        | 1        | 1 | 1 | 1 | 1 | 1 | 1     | 0.054536 | 1        | 0.176471 | 0.024691 | 1        |          |
| 10 | 104140751 | 104140763 | GBF1                                       | 4.77E-05 | 1.51E-07 |          |          |          |          |          |          |   |   |   |   |   |       |          |          |          |          |          |          |

|    |           |           |                                           |          |           |          |          |          |          |          |          |          |          |          |          |          |          |          |          |          |          |
|----|-----------|-----------|-------------------------------------------|----------|-----------|----------|----------|----------|----------|----------|----------|----------|----------|----------|----------|----------|----------|----------|----------|----------|----------|
| 9  | 130413851 | 130413880 | STXB1                                     | 0.042475 | 1         | 1        | 1        | 0.142857 | 1        | 1        | 1        | 1        | 1        | 1        | 0.009157 | 1        | 0.000556 |          |          |          |          |
| 9  | 84267021  | 84267054  | FL1                                       | 1.38E-09 | 0.001699  | 1        | 1        | 0.357539 | 1        | 1        | 1        | 1        | 1        | 1        | 0.375    | 0.00076  | 1        | 0.000593 |          |          |          |
| 2  | 152589615 | 152589626 | NBB                                       | 1.04E-06 | 8.83E-05  | 1        | 1        | 1        | 1        | 1        | 1        | 1        | 1        | 1        | 1        | 9.24E-06 | 1        | 0.000675 |          |          |          |
| 2  | 68272321  | 68272322  | F                                         | 0.001609 | 1.12E-05  | 1        | 1        | 1        | 1        | 1        | 1        | 1        | 1        | 0.312912 | 1        | 1        | 1        | 0.000757 |          |          |          |
| 6  | 160966399 | 160966420 | LPA                                       | 2.08E-09 | 1.7E-05   | 0.169173 | 1        | 1        | 0.227705 | 1        | 1        | 1        | 1        | 1        | 1        | 1.94E-05 | 1        | 0.000799 |          |          |          |
| 7  | 122769378 | 122769427 | SLC13A1                                   | 1.69E-07 | 1         | 1        | 1        | 1        | 1        | 1        | 1        | 1        | 1        | 1        | 0.32     | 2.05E-05 | 1        | 0.000803 |          |          |          |
| 12 | 6840126   | 6840143   | COP57A                                    | 0.015396 | 1         | 1        | 1        | 1        | 1        | 1        | 1        | 1        | 1        | 1        | 1        | 0.010369 | 1        | 0.001062 |          |          |          |
| 17 | 36474721  | 36474733  | MRP1_45                                   | 1.53E-07 | 4.78E-06  | 1        | 1        | 0.149038 | 1        | 1        | 1        | 1        | 1        | 1        | 1        | 1        | 0.000151 | 1        | 0.001065 |          |          |
| 20 | 50015289  | 50015312  | NFATC2                                    | 1.24E-07 | 4.27E-08  | 1        | 1        | 1        | 1        | 1        | 1        | 1        | 1        | 0.205396 | 1        | 0.125    | 1.19E-05 | 1        | 0.001069 |          |          |
| 12 | 49398554  | 49398645  | PRKAG1                                    | 0.000413 | 0.020601  | 1        | 1        | 0.051095 | 1        | 1        | 1        | 1        | 1        | 1        | 1        | 1        | 0.008579 | 1        | 0.001186 |          |          |
| 6  | 63893701  | 63893702  | PCNA                                      | 6.41E-06 | 0.000808  | 1        | 1        | 1        | 1        | 1        | 1        | 1        | 1        | 1        | 1        | 1        | 0.013067 | 1        | 0.001361 |          |          |
| 11 | 43413146  | 43413160  | TTC17                                     | 1.5E-06  | 0.101852  | 0.070779 | 1        | 1        | 1        | 1        | 1        | 1        | 1        | 1        | 1        | 0.025372 | 1        | 0.001317 |          |          |          |
| 7  | 142468336 | 142468342 | PRSS1(dlist=7409),PRSS3P2(dlist=10415)    | 0.118993 | 1         | 1        | 1        | 1        | 0.104167 | 1        | 1        | 1        | 1        | 0.060606 | 1        | 1        | 1        | 0.001425 |          |          |          |
| 17 | 45669428  | 45669438  | NPEPP5                                    | 0.41168  | 0.045594  | 1        | 0.177404 | 1        | 1        | 1        | 1        | 1        | 1        | 1        | 0.2      | 0.005929 | 1        | 0.001442 |          |          |          |
| 14 | 71542879  | 71542890  | PCNX                                      | 9.62E-09 | 7.12E-06  | 1        | 1        | 0.076923 | 1        | 1        | 1        | 1        | 1        | 1        | 1        | 1        | 0.01E-07 | 1        | 0.001543 |          |          |
| 14 | 73945644  | 73945662  | HEATR4                                    | 4.54E-05 | 3.18E-09  | 1        | 1        | 1        | 1        | 1        | 1        | 1        | 1        | 1        | 1        | 1        | 6.92E-06 | 1        | 0.001593 |          |          |
| 6  | 43594565  | 43594593  | GTPBP2                                    | 7.38E-09 | 4.81E-10  | 1        | 1        | 1        | 1        | 1        | 1        | 1        | 1        | 1        | 1        | 1        | 0.344678 | 1        | 0.001617 |          |          |
| 18 | 751380    | 751393    | YES1                                      | 4.31E-06 | 2.76E-11  | 1        | 1        | 0.234193 | 1        | 1        | 1        | 1        | 1        | 1        | 1        | 1        | 0.002729 | 1        | 0.00176  |          |          |
| 1  | 245180629 | 245180651 | EFCAB2                                    | 5.51E-12 | 1.9E-07   | 0.12234  | 1        | 0.224838 | 1        | 1        | 1        | 1        | 1        | 0.067774 | 1        | 1        | 1        | 1.1E-08  | 1        | 0.00221  |          |
| 2  | 37454907  | 37454917  | NCB2                                      | 5.88E-05 | 0.000169  | 1        | 1        | 1        | 1        | 1        | 1        | 1        | 1        | 1        | 0.0625   | 1        | 0.003286 | 1        | 0.00237  |          |          |
| 12 | 8982250   | 8982273   | AZML1                                     | 7.6E-06  | 1.19E-06  | 0.086957 | 1        | 0.152701 | 1        | 1        | 1        | 1        | 1        | 1        | 1        | 1        | 4.1E-06  | 1        | 0.002444 |          |          |
| 2  | 37076776  | 37076800  | STRN                                      | 0.002356 | 1.69E-06  | 1        | 1        | 1        | 1        | 1        | 1        | 1        | 1        | 1        | 1        | 1        | 0.034627 | 1        | 0.002484 |          |          |
| 2  | 189434711 | 189434722 | GULP1                                     | 0.002317 | 1.97E-05  | 0.096154 | 1        | 1        | 1        | 1        | 1        | 1        | 1        | 1        | 1        | 1        | 0.006947 | 1        | 0.002506 |          |          |
| 7  | 56136382  | 56136415  | SUMF2                                     | 7.94E-07 | 0.174603  | 0.142857 | 1        | 1        | 1        | 1        | 1        | 1        | 1        | 1        | 1        | 1        | 0.039927 | 1        | 0.002638 |          |          |
| 17 | 73660992  | 73661024  | RECQL5                                    | 1.53E-05 | 1.19E-08  | 1        | 1        | 1        | 1        | 1        | 1        | 1        | 1        | 1        | 1        | 1        | 0.008957 | 1        | 0.002695 |          |          |
| 17 | 38548371  | 38548383  | CC3B3                                     | 2.34E-07 | 1.92E-07  | 1        | 1        | 1        | 1        | 1        | 1        | 1        | 1        | 1        | 0.467836 | 1        | 3.63E-07 | 1        | 0.002719 |          |          |
| 8  | 102381882 | 102381893 | NACAP1                                    | 1.6E-06  | 6.63E-05  | 0.075472 | 1        | 1        | 1        | 1        | 1        | 1        | 1        | 1        | 1        | 1        | 6.3E-06  | 1        | 0.002849 |          |          |
| X  | 15593697  | 15593710  | ACE2                                      | 0.305596 | 0.042308  | 1        | 1        | 1        | 1        | 1        | 1        | 1        | 1        | 1        | 1        | 1        | 1        | 1        | 0.002951 |          |          |
| 17 | 35985897  | 35985908  | DDX52                                     | 0.000556 | 1.42E-05  | 1        | 0.115385 | 1        | 1        | 1        | 1        | 1        | 1        | 1        | 1        | 1        | 0.000371 | 1        | 0.003086 |          |          |
| 13 | 131136173 | 131136212 | ASAP1                                     | 0.000211 | 0.01084   | 0.080645 | 1        | 1        | 1        | 1        | 1        | 1        | 1        | 1        | 1        | 1        | 0.000101 | 1        | 0.003104 |          |          |
| 22 | 32813176  | 32813194  | BPICF                                     | 0.000448 | 7.94E-10  | 1        | 1        | 1        | 1        | 1        | 1        | 1        | 1        | 1        | 1        | 1        | 3.34E-06 | 1        | 0.00317  |          |          |
| 7  | 72689488  | 72689513  | NCF1B(dlist=35509),NSUN5(dlist=31002)     | 0.071068 | 1         | 1        | 1        | 1        | 1        | 1        | 1        | 1        | 1        | 1        | 1        | 1        | 0.003983 | 1        | 0.003274 |          |          |
| 5  | 83663779  | 83663783  | SLC3B3                                    | 0.000372 | 2.27E-11  | 1        | 1        | 1        | 1        | 1        | 1        | 1        | 1        | 1        | 1        | 1        | 1        | 1        | 1.6E-06  | 1        | 0.003361 |
| 10 | 93776240  | 93776254  | BTAP1                                     | 6.12E-11 | 7.65E-08  | 0.171717 | 1        | 1        | 1        | 1        | 1        | 1        | 1        | 0.059985 | 1        | 1        | 0.001357 | 1        | 0.003391 |          |          |
| 19 | 55452194  | 55452209  | NLRP7                                     | 1.06E-08 | 0.031962  | 1        | 1        | 0.132174 | 1        | 1        | 1        | 1        | 1        | 0.061538 | 0.126167 | 1        | 1        | 1.86E-07 | 0.103448 | 0.003428 |          |
| 21 | 34903875  | 34903903  | GART                                      | 0.000432 | 9.29E-07  | 0.076923 | 1        | 1        | 1        | 1        | 1        | 1        | 1        | 1        | 1        | 1        | 0.000161 | 1        | 0.003495 |          |          |
| 6  | 151420589 | 151420603 | MTHFD1L                                   | 3.19E-09 | 1.8E-10   | 1        | 0.129487 | 1        | 1        | 1        | 1        | 1        | 1        | 1        | 1        | 1        | 0.005522 | 1        | 0.003703 |          |          |
| 4  | 48530069  | 48530081  | FRYL                                      | 1.44E-11 | 1.84E-12  | 1        | 1        | 1        | 1        | 1        | 1        | 1        | 1        | 1        | 0.071429 | 9.81E-09 | 1        | 0.003746 |          |          |          |
| 12 | 50050142  | 50050168  | FMNL3                                     | 0.418079 | 0.185185  | 0.05     | 1        | 1        | 1        | 1        | 1        | 1        | 1        | 1        | 0.2      | 0.001334 | 1        | 0.003851 |          |          |          |
| 12 | 37513786  | 37513807  | NR2F1-AS1                                 | 0.000372 | 0.000348  | 1        | 0.074786 | 1        | 1        | 1        | 1        | 1        | 1        | 1        | 1        | 1        | 0.000893 | 1        | 0.003868 |          |          |
| 11 | 75694430  | 75694441  | LYRAG                                     | 1.77E-07 | 2.51E-06  | 1        | 1        | 1        | 1        | 1        | 1        | 1        | 1        | 1        | 1        | 1        | 1        | 1        | 1.63E-06 | 1        | 0.004164 |
| 12 | 8757509   | 8757515   | ACDA                                      | 8.08E-09 | 8.28E-07  | 1        | 1        | 1        | 0.170198 | 1        | 1        | 1        | 1        | 0.128045 | 1        | 1        | 3.98E-08 | 1        | 0.004194 |          |          |
| 10 | 101829686 | 101829697 | CPNL1                                     | 0.000469 | 1.28E-07  | 0.052632 | 1        | 1        | 1        | 1        | 1        | 1        | 1        | 1        | 1        | 1        | 0.001536 | 1        | 0.004199 |          |          |
| 4  | 152609920 | 152609934 | GATB                                      | 0.000143 | 2.46E-06  | 1        | 0.319154 | 1        | 0.187534 | 1        | 0.078228 | 0.129897 | 1        | 0.313725 | 0.000178 | 1        | 1        | 0.004288 |          |          |          |
| 5  | 96339092  | 96339114  | LNPEP                                     | 3.93E-06 | 6.72E-05  | 0.071429 | 1        | 0.315011 | 1        | 0.065918 | 1        | 1        | 1        | 0.272727 | 7.36E-06 | 1        | 1        | 0.004441 |          |          |          |
| 17 | 58147228  | 58147258  | HEATR6                                    | 0.006002 | 0.000671  | 1        | 1        | 1        | 1        | 1        | 1        | 1        | 1        | 1        | 1        | 1        | 0.010415 | 1        | 0.004491 |          |          |
| 1  | 215192845 | 215192894 | ADAM2                                     | 0.000501 | 0.577387  | 1        | 1        | 1        | 1        | 1        | 1        | 1        | 1        | 0.444444 | 0.083333 | 1        | 0.004495 |          |          |          |          |
| 2  | 20861556  | 20861574  | CRB1                                      | 0.010408 | 0.000476  | 0.05     | 1        | 1        | 1        | 1        | 1        | 1        | 1        | 1        | 1        | 1        | 1        | 1        | 4.82E-06 | 1        | 0.004762 |
| 1  | 173881163 | 173881173 | SERPINC1                                  | 0.0087   | 3.27E-07  | 1        | 1        | 1        | 1        | 1        | 1        | 1        | 1        | 1        | 1        | 1        | 0.117944 | 1        | 0.004818 |          |          |
| 7  | 150384193 | 150384244 | GIMAP2                                    | 1        | 1         | 1        | 0.058812 | 1        | 1        | 1        | 1        | 1        | 1        | 1        | 1        | 1        | 1        | 1        | 1        | 0.004856 |          |
| 13 | 28980036  | 28980047  | FLT1                                      | 0.000832 | 8.41E-07  | 1        | 1        | 1        | 1        | 1        | 1        | 1        | 1        | 0.169427 | 1        | 1        | 0.431184 | 1        | 0.004916 |          |          |
| 2  | 74076616  | 74076633  | STAMPB                                    | 2.8E-06  | 3.36E-12  | 1        | 1        | 1        | 1        | 1        | 1        | 1        | 1        | 1        | 1        | 1        | 0.002578 | 1        | 0.005065 |          |          |
| 17 | 78349502  | 78349513  | LOC100294362                              | 4.09E-12 | 7.39E-10  | 0.068966 | 1        | 1        | 1        | 1        | 1        | 1        | 1        | 1        | 1        | 1        | 0.082107 | 1        | 0.005122 |          |          |
| 18 | 60110451  | 60110479  | NRPSF11(dlist=55508),ZCCHC2(dlist=80179)  | 7.75E-07 | 1.82E-08  | 1        | 1        | 1        | 1        | 1        | 1        | 1        | 1        | 1        | 1        | 1        | 0.000116 | 1        | 0.005168 |          |          |
| 4  | 85866565  | 85866594  | USP39                                     | 1.83E-06 | 0.010077  | 0.313725 | 1        | 1        | 1        | 1        | 1        | 1        | 1        | 1        | 1        | 1        | 0.023277 | 1        | 0.005966 |          |          |
| 7  | 138768472 | 138768492 | ZC3HAV1                                   | 1.54E-05 | 0.000258  | 1        | 1        | 1        | 1        | 1        | 1        | 1        | 1        | 1        | 1        | 1        | 1        | 6.58E-06 | 1        | 0.005211 |          |
| 16 | 21763589  | 21763638  | OTOA                                      | 0.01855  | 3.3E-05   | 1        | 1        | 1        | 1        | 1        | 1        | 1        | 1        | 1        | 1        | 1        | 0.000334 | 1        | 0.005364 |          |          |
| 9  | 86893061  | 86893072  | SLC28A3                                   | 0.000425 | 0.000112  | 1        | 1        | 1        | 1        | 1        | 1        | 1        | 1        | 1        | 1        | 1        | 0.005644 | 1        | 0.005789 |          |          |
| 16 | 15892465  | 15892503  | MYPH11                                    | 0.00024  | 0.001914  | 0.154595 | 1        | 1        | 1        | 1        | 1        | 1        | 1        | 1        | 1        | 1        | 0.002336 | 1        | 0.005915 |          |          |
| 3  | 10382058  | 10382073  | ATP2B2                                    | 0.101587 | 0.083617  | 0.057143 | 1        | 1        | 1        | 1        | 1        | 1        | 1        | 1        | 1        | 1        | 0.007066 | 1        | 0.006061 |          |          |
| 3  | 121500479 | 121500528 | IQCB1                                     | 2.75E-07 | 0.102315  | 0.237903 | 1        | 0.304366 | 1        | 1        | 1        | 1        | 1        | 1        | 0.375    | 0.030392 | 1        | 0.006801 |          |          |          |
| 4  | 183521050 | 183521074 | TENM3                                     | 1        | 8.81E-05  | 1        | 1        | 1        | 1        | 1        | 1        | 1        | 1        | 1        | 1        | 1        | 2.84E-05 | 1        | 0.006966 |          |          |
| 19 | 15795566  | 15795569  | CYP4F12                                   | 0.004867 | 1         | 1        | 1        | 1        | 1        | 1        | 1        | 1        | 1        | 1        | 1        | 1        | 0.266074 | 1        | 0.007069 |          |          |
| 10 | 15883639  | 15883651  | FAMI88A                                   | 4.18E-11 | 1.02E-10  | 1        | 1        | 1        | 1        | 1        | 1        | 1        | 1        | 1        | 1        | 1        | 1.01E-10 | 1        | 0.007149 |          |          |
| 17 | 29528406  | 29528408  | NF1                                       | 3.31E-06 | 2.36E-08  | 0.193103 | 1        | 1        | 1        | 1        | 1        | 1        | 0.073375 | 0.102041 | 1        | 1        | 0.04E-08 | 1        | 0.007265 |          |          |
| 6  | 3077011   | 3077025   | RIPK1                                     | 0.00131  | 0.054934  | 1        | 1        | 1        | 1        | 1        | 1        | 1        | 1        | 1        | 1        | 1        | 0.013581 | 1        | 0.007362 |          |          |
| 12 | 130970483 | 130970495 | TUBA3E(dlist=14449),CCDC115(dlist=125011) | 7.39E-05 | 0.000315  | 0.338924 | 1        | 0.245351 | 1        | 1        | 1        | 1        | 0.083333 | 1        | 1        | 0.000837 | 1        | 0.007632 |          |          |          |
| 12 | 18854540  | 18854586  | PLCZ1                                     | 1        | 1         | 1        | 0.08037  | 1        | 1        | 1        | 1        | 1        | 1        | 1        | 1        | 1        | 0.020549 | 1        | 0.008084 |          |          |
| 2  | 444193145 | 444193166 | ARHGAP15                                  | 8.63E-12 | 0.0004524 | 0.238915 | 1        | 1        | 1        | 1        | 1        | 1        | 0.056526 | 0.059406 | 1        | 1        | 0.002812 | 1        | 0.008095 |          |          |
| 15 | 84651006  | 84651018  | ADAMTSL3                                  | 5.48E-08 | 3.74E-12  | 1        | 1        | 1        | 1        | 1        | 1        | 1        | 1        | 1        | 1        | 1        | 9.82E-06 | 1        | 0.008433 |          |          |
| 5  | 52370822  | 52370833  | ITGA2</                                   |          |           |          |          |          |          |          |          |          |          |          |          |          |          |          |          |          |          |

Supplemental Table 5. Pairwise Euclidean dissimilarity matrix of tissue-specific informative microsatellite loci based on tissue-scaled p-values

|      | UCEC | STAD | READ | PRAD | OV   | LUSC | LUAD | LGG  | KIRC | GBM  | ESCA | DLBC | COAD | CESC | BRCA |
|------|------|------|------|------|------|------|------|------|------|------|------|------|------|------|------|
| UCEC | 0    | 10.7 | 13.8 | 18.2 | 17.2 | 16.6 | 16.6 | 20.8 | 17.4 | 16.8 | 17.1 | 18.9 | 9.3  | 15   | 12.4 |
| STAD | 10.7 | 0    | 16.1 | 19.3 | 19.5 | 18.7 | 18.4 | 22.8 | 19.3 | 18.7 | 19.6 | 21.8 | 12.5 | 18   | 15.4 |
| READ | 13.8 | 16.1 | 0    | 19.9 | 18.8 | 18.2 | 18.6 | 22.1 | 19.7 | 18.9 | 20.4 | 19.8 | 13.1 | 17.9 | 15.7 |
| PRAD | 18.2 | 19.3 | 19.9 | 0    | 16   | 13.7 | 14.6 | 18.2 | 18.7 | 15   | 21.2 | 15.9 | 19.2 | 16.2 | 15.4 |
| OV   | 17.2 | 19.5 | 18.8 | 16   | 0    | 11.6 | 12.8 | 16.7 | 17   | 13.2 | 20.3 | 13   | 18.3 | 14.4 | 13.4 |
| LUSC | 16.6 | 18.7 | 18.2 | 13.7 | 11.6 | 0    | 9.9  | 14.4 | 15.5 | 10.4 | 19.4 | 10.6 | 17.8 | 12.4 | 11.8 |
| LUAD | 16.6 | 18.4 | 18.6 | 14.6 | 12.8 | 9.9  | 0    | 15.6 | 16.2 | 11.2 | 19.7 | 12.2 | 17.9 | 13.3 | 12.5 |
| LGG  | 20.8 | 22.8 | 22.1 | 18.2 | 16.7 | 14.4 | 15.6 | 0    | 19.7 | 15.6 | 23   | 15.8 | 22   | 17.2 | 16.8 |
| KIRC | 17.4 | 19.3 | 19.7 | 18.7 | 17   | 15.5 | 16.2 | 19.7 | 0    | 16.4 | 21.9 | 17   | 18.8 | 17.2 | 15.8 |
| GBM  | 16.8 | 18.7 | 18.9 | 15   | 13.2 | 10.4 | 11.2 | 15.6 | 16.4 | 0    | 20   | 12.4 | 18.3 | 13.8 | 12.6 |
| ESCA | 17.1 | 19.6 | 20.4 | 21.2 | 20.3 | 19.4 | 19.7 | 23   | 21.9 | 20   | 0    | 20.9 | 18.3 | 18.3 | 18.2 |
| DLBC | 18.9 | 21.8 | 19.8 | 15.9 | 13   | 10.6 | 12.2 | 15.8 | 17   | 12.4 | 20.9 | 0    | 19.8 | 14.3 | 13.8 |
| COAD | 9.3  | 12.5 | 13.1 | 19.2 | 18.3 | 17.8 | 17.9 | 22   | 18.8 | 18.3 | 18.3 | 19.8 | 0    | 16.5 | 14   |
| CESC | 15   | 18   | 17.9 | 16.2 | 14.4 | 12.4 | 13.3 | 17.2 | 17.2 | 13.8 | 18.3 | 14.3 | 16.5 | 0    | 13.1 |
| BRCA | 12.4 | 15.4 | 15.7 | 15.4 | 13.4 | 11.8 | 12.5 | 16.8 | 15.8 | 12.6 | 18.2 | 13.8 | 14   | 13.1 | 0    |

Supplemental Table 6. Pairwise Cophenetic dissimilarity matrix of tissue-specific informative microsatellite loci based on tissue-scaled p-values

|      | UCEC | STAD | READ | PRAD | OV   | LUSC | LUAD | LGG  | KIRC | GBM  | ESCA | DLBC | COAD | CESC | BRCA |
|------|------|------|------|------|------|------|------|------|------|------|------|------|------|------|------|
| UCEC | 0    | 12.5 | 16.1 | 23   | 23   | 23   | 23   | 23   | 19.7 | 23   | 21.9 | 23   | 9.3  | 23   | 23   |
| STAD | 12.5 | 0    | 16.1 | 23   | 23   | 23   | 23   | 23   | 19.7 | 23   | 21.9 | 23   | 12.5 | 23   | 23   |
| READ | 16.1 | 16.1 | 0    | 23   | 23   | 23   | 23   | 23   | 19.7 | 23   | 21.9 | 23   | 16.1 | 23   | 23   |
| PRAD | 23   | 23   | 23   | 0    | 16.2 | 16.2 | 16.2 | 18.2 | 23   | 16.2 | 23   | 16.2 | 23   | 16.2 | 16.2 |
| OV   | 23   | 23   | 23   | 16.2 | 0    | 13.2 | 13.2 | 18.2 | 23   | 13.2 | 23   | 13.2 | 23   | 14.4 | 14.4 |
| LUSC | 23   | 23   | 23   | 16.2 | 13.2 | 0    | 9.9  | 18.2 | 23   | 11.2 | 23   | 12.4 | 23   | 14.4 | 14.4 |
| LUAD | 23   | 23   | 23   | 16.2 | 13.2 | 9.9  | 0    | 18.2 | 23   | 11.2 | 23   | 12.4 | 23   | 14.4 | 14.4 |
| LGG  | 23   | 23   | 23   | 18.2 | 18.2 | 18.2 | 18.2 | 0    | 23   | 18.2 | 23   | 18.2 | 23   | 18.2 | 18.2 |
| KIRC | 19.7 | 19.7 | 19.7 | 23   | 23   | 23   | 23   | 23   | 0    | 23   | 21.9 | 23   | 19.7 | 23   | 23   |
| GBM  | 23   | 23   | 23   | 16.2 | 13.2 | 11.2 | 11.2 | 18.2 | 23   | 0    | 23   | 12.4 | 23   | 14.4 | 14.4 |
| ESCA | 21.9 | 21.9 | 21.9 | 23   | 23   | 23   | 23   | 23   | 21.9 | 23   | 0    | 23   | 21.9 | 23   | 23   |
| DLBC | 23   | 23   | 23   | 16.2 | 13.2 | 12.4 | 12.4 | 18.2 | 23   | 12.4 | 23   | 0    | 23   | 14.4 | 14.4 |
| COAD | 9.3  | 12.5 | 16.1 | 23   | 23   | 23   | 23   | 23   | 19.7 | 23   | 21.9 | 23   | 0    | 23   | 23   |
| CESC | 23   | 23   | 23   | 16.2 | 14.4 | 14.4 | 14.4 | 18.2 | 23   | 14.4 | 23   | 14.4 | 23   | 0    | 13.1 |
| BRCA | 23   | 23   | 23   | 16.2 | 14.4 | 14.4 | 14.4 | 18.2 | 23   | 14.4 | 23   | 14.4 | 23   | 13.1 | 0    |

Supplemental Table 7. Coordinates of and p values of cross-informative microsatellites for diagnosing MSI in endometrial, colon, rectal, and stomach cancers

| Chromosome | Start Position | End Position | Gene(s) or distance to closest genes (dist) | UCEC     | STAD     | READ     | COAD     |
|------------|----------------|--------------|---------------------------------------------|----------|----------|----------|----------|
| 1          | 149900985      | 149901002    | MTMR11                                      | 1.55E-20 | 3.34E-19 | 6.52E-06 | 3.11E-17 |
| 1          | 222904869      | 222904881    | BROX                                        | 6.01E-27 | 5.06E-33 | 4.59E-06 | 4.84E-29 |
| 10         | 112360315      | 112360333    | SMC3                                        | 7.66E-28 | 1.89E-24 | 8.23E-07 | 1.18E-37 |
| 10         | 35314130       | 35314161     | CUL2                                        | 2.33E-16 | 9.48E-12 | 1.23E-06 | 4.56E-27 |
| 10         | 64022582       | 64022593     | RTKN2                                       | 1.14E-13 | 1.26E-15 | 5.14E-06 | 5.43E-17 |
| 11         | 118885668      | 118885701    | CCDC84                                      | 3.57E-10 | 1.68E-16 | 9.19E-07 | 1.36E-17 |
| 12         | 110834030      | 110834049    | ANAPC7                                      | 1.25E-18 | 2.99E-14 | 2.25E-06 | 1.85E-34 |
| 12         | 125587478      | 125587491    | AACS                                        | 1.42E-14 | 3.9E-35  | 1.3E-06  | 3.9E-23  |
| 12         | 85285920       | 85285938     | SLC6A15                                     | 1.8E-19  | 8.25E-19 | 4.63E-06 | 2.36E-18 |
| 12         | 89853387       | 89853405     | POC1B                                       | 9.49E-13 | 1.35E-13 | 4.11E-06 | 5.25E-30 |
| 13         | 79216356       | 79216381     | RNF219                                      | 8.49E-32 | 1.14E-34 | 2.53E-06 | 6.25E-34 |
| 15         | 55841195       | 55841209     | PYGO1                                       | 4.8E-19  | 1.24E-21 | 4.34E-06 | 2.55E-26 |
| 16         | 10567751       | 10567778     | ATF7IP2                                     | 2.76E-17 | 2.32E-06 | 6.14E-06 | 5.38E-28 |
| 16         | 3808052        | 3808066      | CREBBP                                      | 9.43E-24 | 1.7E-25  | 9.19E-07 | 1.29E-25 |
| 16         | 9010826        | 9010844      | USP7                                        | 1.28E-12 | 4.6E-07  | 3.16E-06 | 7.6E-23  |
| 17         | 29508819       | 29508836     | NF1                                         | 5.07E-19 | 7.64E-19 | 3.01E-06 | 7.41E-39 |
| 19         | 6026288        | 6026302      | RFX2                                        | 7.76E-21 | 2.88E-29 | 2.86E-06 | 1.91E-22 |
| 2          | 141294271      | 141294299    | LRP1B                                       | 1.04E-25 | 1.04E-09 | 6.52E-06 | 1.86E-13 |
| 2          | 203676382      | 203676403    | ICA1L                                       | 1.1E-09  | 9.47E-08 | 6.74E-06 | 1.03E-28 |
| 2          | 32095023       | 32095056     | MEMO1                                       | 3.71E-16 | 3.72E-09 | 7.87E-06 | 4.58E-25 |
| 2          | 8998775        | 8998788      | MBOAT2                                      | 1.18E-13 | 4.18E-21 | 6.14E-06 | 1.92E-13 |
| 3          | 41877473       | 41877487     | ULK4                                        | 5.73E-19 | 2.07E-18 | 4.63E-06 | 3.47E-23 |
| 4          | 146031236      | 146031253    | ABCE1                                       | 1.39E-34 | 1.29E-17 | 3.16E-06 | 3.47E-37 |
| 5          | 172578549      | 172578567    | BNIP1                                       | 3.33E-35 | 9.43E-28 | 4.25E-06 | 5.33E-35 |
| 5          | 36123065       | 36123135     | LMBRD2                                      | 1.78E-36 | 2.55E-15 | 1.03E-06 | 5.76E-29 |
| 6          | 102130410      | 102130422    | GRIK2                                       | 1.29E-13 | 8.04E-15 | 2.35E-06 | 8.03E-08 |
| 6          | 122733490      | 122733508    | HSF2                                        | 1.08E-16 | 2.77E-20 | 1.23E-06 | 1.46E-14 |
| 6          | 36452603       | 36452620     | KCTD20                                      | 1.66E-22 | 6.6E-29  | 8.39E-06 | 2.83E-32 |
| 6          | 46636556       | 46636581     | SLC25A27                                    | 1.08E-15 | 1.69E-19 | 5.78E-06 | 3.27E-22 |
| 6          | 49415351       | 49415368     | MUT                                         | 3.52E-18 | 2.84E-22 | 6.94E-06 | 8.71E-33 |
| 7          | 97939975       | 97939988     | BAIAP2L1                                    | 3.04E-24 | 6.88E-19 | 2.05E-06 | 5.79E-15 |
| 8          | 100160282      | 100160300    | VPS13B                                      | 5.77E-32 | 2.33E-24 | 5.83E-06 | 7.54E-28 |
| 8          | 33356825       | 33356839     | MAK16                                       | 2.52E-24 | 8.7E-14  | 1.79E-06 | 3.19E-22 |
| 9          | 52625          | 52641        | FAM138C(dist=16761),PGM5P3-AS1(dist=20049)  | 6.03E-18 | 5.71E-20 | 5.15E-06 | 1.08E-12 |
| 9          | 75420448       | 75420463     | TMC1                                        | 2.37E-21 | 3.03E-18 | 2.48E-06 | 1.05E-17 |
| X          | 106092450      | 106092473    | TBC1D8B                                     | 2.06E-35 | 1.3E-07  | 3.51E-06 | 2.91E-36 |
| X          | 19380975       | 19380993     | MAP3K15                                     | 9.58E-29 | 1.52E-24 | 9.19E-07 | 4.16E-21 |

**Supplemental Table 8. Covariates associated with instability of MSI-informative microsatellites**

| Feature Category  | Feature                 | Coefficient*     | 97.5% confidence interval |            |            | p value  |
|-------------------|-------------------------|------------------|---------------------------|------------|------------|----------|
| Coding context    | Intergenic              | Not applicable** |                           |            |            |          |
|                   | Upstream                | 0.26330362       | 0.201082791               | to         | 0.32552445 | 1.1E-16  |
|                   | Downstream              | 0.24775092       | 0.19523743                | to         | 0.3002644  | 2.32E-20 |
|                   | Exonic                  | 0.63116873       | 0.312458773               | to         | 0.94987869 | 0.000104 |
|                   | Intronic                | 0.22357372       | 0.214076632               | to         | 0.23307081 | 0        |
|                   | ncRNA exonic            | 0.24869416       | 0.139176607               | to         | 0.35821171 | 8.56E-06 |
|                   | ncRNA intronic          | 0.06674437       | 0.045628207               | to         | 0.08786053 | 5.83E-10 |
|                   | ncRNA splicing          | 0.80560147       | 0.355024088               | to         | 1.25617886 | 0.000458 |
|                   | Splicing                | 1.095599         | 0.889927325               | to         | 1.30127068 | 1.63E-25 |
|                   | Upstream and Downstream | 0.20875388       | -0.103550755              | to         | 0.52105852 | 0.190162 |
|                   | 3' UTR                  | 0.54949742       | 0.502719112               | to         | 0.59627574 | 3.1E-117 |
| 5' UTR            | 0.64615781              | 0.442216539      | to                        | 0.85009909 | 5.31E-10   |          |
| Repeat class      | Compound repeat         | 1.46871369       | 1.301270946               | to         | 1.63615644 | 3.18E-66 |
|                   | Complex repeat          | 0.92271293       | 0.751505079               | to         | 1.09392078 | 4.44E-26 |
|                   | Mononucleotide repeat   | 1.44146313       | 1.272848876               | to         | 1.61007737 | 5.33E-63 |
|                   | Dinucleotide repeat     | 0.15687561       | -0.012360733              | to         | 0.32611194 | 0.069246 |
|                   | Trinucleotide repeat    | -0.118346        | -0.4131167                | to         | 0.17642471 | 0.431342 |
|                   | Tetranucleotide Repeat  | 0.24265869       | 0.054478379               | to         | 0.43083901 | 0.011492 |
| Number of repeats | Pentanucleotide Repeat  | Not applicable** |                           |            |            |          |
|                   | 5-11                    | Not applicable** |                           |            |            |          |
|                   | 11-12                   | 0.80031813       | 0.779980199               | to         | 0.82065606 | 0        |
|                   | 12-13                   | 1.77745115       | 1.757111464               | to         | 1.79779084 | 0        |
|                   | 13-14                   | 1.59183987       | 1.571499926               | to         | 1.61217982 | 0        |
|                   | 14-16                   | 1.50008182       | 1.479731404               | to         | 1.52043224 | 0        |
|                   | 16-18                   | 0.31325393       | 0.2920993                 | to         | 0.33440855 | 4.6E-185 |
|                   | 18-21                   | -0.1869956       | -0.211463299              | to         | -0.162528  | 1.03E-50 |
|                   | 21-25                   | -0.2282874       | -0.255785148              | to         | -0.2007896 | 1.61E-59 |
|                   | 25-32                   | -0.5444188       | -0.572807037              | to         | -0.5160306 | 0        |
| >32               | -1.2434585              | -1.272243027     | to                        | -1.2146739 | 0          |          |

\*Positive coefficients values are associated with microsatellite instability; negative values are associated with microsatellite stability

\*\*Category was used as reference for statistical comparisons
